# Supplementary material for: Stereoselective alkylC-glycosylation of glycosyl estersviaanomeric C–O bond homolysis: efficient access toC-glycosyl amino acids andC-glycosyl peptides
Source: Royal Society of Chemistry journal article supplement (doi:10.1039/d3sc01995k), 2023-01-01

## SUPPORTING INFORMATION

### **Stereoselective Alkyl C-Glycosylation of Glycosyl Esters *via* Anomeric C-O Bonds Homolysis: Efficient Access to C-Glycosyl Amino Acids and C-Glycosyl Peptides**

Anrong Chen,<sup>[+][a]</sup> Shiyin Zhao,<sup>[+][a][b]</sup> Yang Han,<sup>[+][a]</sup> Zhenghong Zhou,<sup>[a]</sup> Bo Yang,<sup>[a]</sup> Lan-Gui Xie<sup>\*[b]</sup>,  
Maciej A. Walczak<sup>\*[c]</sup>, and Feng Zhu<sup>\*[a]</sup>

<sup>a</sup>Frontiers Science Center for Transformative Molecules (FSCTM), Shanghai Key Laboratory for Molecular Engineering of Chiral Drugs, Department of Chemical Biology, School of Chemistry and Chemical Engineering, Zhangjiang Institute for Advanced Study, Shanghai Jiao Tong University, Shanghai, 200240, P. R. China

<sup>b</sup>School of Chemistry and Materials Science, Nanjing Normal University, Nanjing, 210023, P. R. China

<sup>c</sup>Department of Chemistry, University of Colorado, Boulder, CO 80309, United States

\* xielg@njnu.edu.cn

\*maciej.walczak@colorado.edu

\* fzchem@sjtu.edu.cn

<sup>+</sup>*These authors contributed equally*

## Table of Contents

|                                                                                                            |            |
|------------------------------------------------------------------------------------------------------------|------------|
| <b>1. General Information</b>                                                                              | <b>S3</b>  |
| <b>2. General Procedures</b>                                                                               | <b>S4</b>  |
| <b>3. Additional Reaction Optimization Conditions</b>                                                      | <b>S7</b>  |
| <b>4. Detailed Experimental Procedures for the Coupling of Glycosyl Esters with Chiral Dehydroalanines</b> | <b>S8</b>  |
| <b>5. Detailed Experimental Procedures for Preparation of Glycosyl 4-Formate-1,4- dihydropyridine</b>      | <b>S31</b> |
| <b>6. Detailed Experimental Procedures for Dehydroalanine Derivatives</b>                                  | <b>S45</b> |
| <b>7. Synthetic Applications and Transformation</b>                                                        | <b>S51</b> |
| <b>8. Mechanistic Studies</b>                                                                              | <b>S54</b> |
| <b>9. Computational Details</b>                                                                            | <b>S56</b> |
| <b>10. References</b>                                                                                      | <b>S72</b> |
| <b>11. Copies of 1D and 2D NMR spectra</b>                                                                 | <b>S74</b> |

## 1. General Information

Commercially available materials were used as received without further purification unless otherwise noted. All reactions were carried out under anhydrous N<sub>2</sub> in oven-dried glassware. Ir[dF(CF<sub>3</sub>)ppy]<sub>2</sub>(dtbbpy)PF<sub>6</sub> (95% purity) were purchased from Leyan, Anhydrous CH<sub>3</sub>CN (99.5% purity), anhydrous 1,4-dioxane (99.5% purity) were purchased from Adamas. Aldrich® Micro Photochemical Reactors (6 W blue LED strips) were purchased from Sigma-Aldrich. Visualizations were performed with UV light and/or Hanessian stain and/or sulfuric acid stain (5% H<sub>2</sub>SO<sub>4</sub> in MeOH). Column chromatography was performed on silica gel (200-400 mesh). Automated column chromatography was performed on a Biotage Selekt using Silicycle high-resolution SiO<sub>2</sub> cartridges unless otherwise noted. <sup>1</sup>H and <sup>13</sup>C NMR spectra were recorded on Bruker 400/500 MHz instruments and were reported as follows: chemical shift (δ), multiplicity (s = singlet, d = doublet, t = triplet, q = quartet, br = broad, m = multiplet), coupling constants (Hz), and integration. The residual solvent reference peaks were used from published literature. 2D NMR experiments were performed using standard parameters (*200 and More NMR Experiments*, S. Berger, S. Braun, Wiley-VCH, **2004**). High-resolution mass spectra (HR-MS) were recorded on a Waters Micromass Q-ToF Premier mass spectrometer. Optical rotations were measured on JASCO P-1030 and were reported as average of five data points. Optical rotations were measured on an Anton Paar MCP100 automatic polarimeter using a 100 mm path-length cell at 589 nm. Thin layer chromatography was used to monitor reaction progress and analyze fractions from column chromatography.

## 2. General Procedures

### 2.1 General Procedure for the Coupling of Glycosyl Esters with Chiral Dehydroalanines

#### Procedure A:

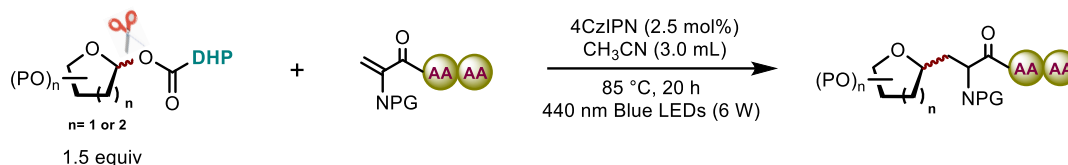

Glycosyl esters (1.50 equiv), chiral dehydroalanines (1.00 equiv), 4CzIPN (2.5 mol%) were added to a one-dram vial with a screw-top septum, and the vial was then evacuated and refilled with N<sub>2</sub> (3×). Anhydrous CH<sub>3</sub>CN (3.00 mL) were added, and the reaction mixture was stirred at 85 °C under 6W blue LED irradiation for 20 h, cooled to rt, filtered through a pad of Celite®, and concentrated. It is worth noting that the upper edge of the heating block submerges up 1/3 of the reaction mixture. <sup>1</sup>H NMR spectra were recorded using this mixture to evaluate diastereoselectivity. The crude material was purified by column chromatography on SiO<sub>2</sub>.

#### Procedure B:

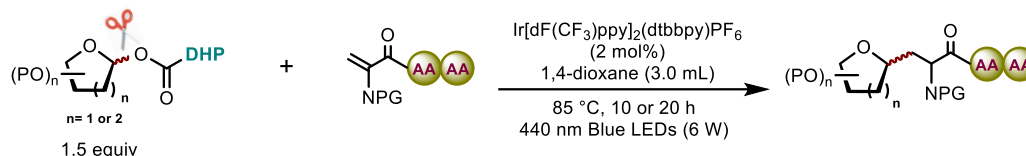

Glycosyl esters (1.50 equiv), chiral dehydroalanines (1.00 equiv), Ir[dF(CF<sub>3</sub>)ppy]<sub>2</sub>(dtbbpy)PF<sub>6</sub> (2.0 mol%) were added to a one-dram vial with a screw-top septum, and the vial was then evacuated and refilled with N<sub>2</sub> (3×). Anhydrous 1,4-dioxane (3.00 mL) were added, and the reaction mixture was stirred at 85 °C under 6W blue LED irradiation for 10 h or 20 h, cooled to rt, filtered through a pad of Celite®, and concentrated. It is worth noting that the upper edge of the heating block submerges up 1/3 of the reaction mixture. <sup>1</sup>H NMR spectra were recorded using this mixture to evaluate diastereoselectivity. The crude material was purified by column chromatography on SiO<sub>2</sub>.

#### Procedure C:

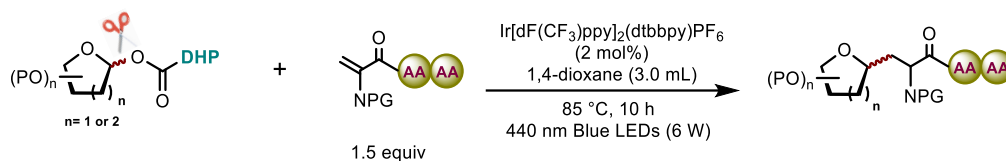

Glycosyl esters (1.00 equiv), chiral dehydroalanines (1.50 equiv), Ir[dF(CF<sub>3</sub>)ppy]<sub>2</sub>(dtbbpy)PF<sub>6</sub> (2.0 mol%) were added to a one-dram vial with a screw-top septum, and the vial was then evacuated and refilled with N<sub>2</sub> (3×). Anhydrous 1,4-dioxane (3.00 mL) were added, and the reaction mixture was stirred at 85 °C for 10 h under 6W blue LED irradiation, cooled to rt, filtered through a pad of Celite®, and concentrated. It is worth noting that the upper edge of the heating block submerges up 1/3 of the reaction mixture. <sup>1</sup>H NMR spectra were recorded using this mixture to evaluate diastereoselectivity. The crude material was purified by column chromatography on SiO<sub>2</sub>.



## Reaction Set-up for the Radical Addition of Glycosyl Esters with Chiral Dehydroalanines:

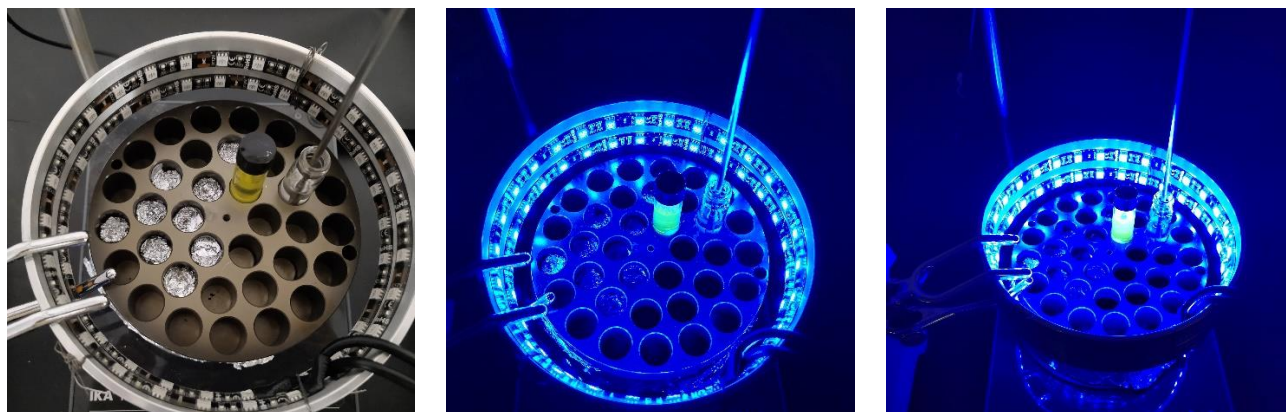

### 2.2 General Procedure D for Preparation of Glycosyl 4-Formate-1,4-dihydropyridine<sup>1</sup>

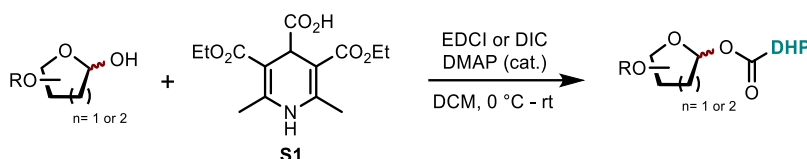

In a round bottom flask, carboxylic acid **S1**, EDCI (EDCI = 1-ethyl-3-(3-dimethylaminopropyl)-carbodiimide hydrochloride) and DMAP (DMAP = 4-dimethylaminopyridine) (0.100 equiv) were added to a solution of protected-furanose or -pyranose (1.00 equiv) in DCM (0.200 M) at 0 °C. After stirring for 30 minutes, the resulting yellow reaction mixture was warmed up to rt and stirred for 12 h to 18 h. After solvent removal *in vacuo*, the residue was purified by flash column chromatography to afford the corresponding glycosyl ester. Replacing EDCI with DIC (DIC = *N,N'*-diisopropylcarbodiimide) resulted in higher conversion to the ester in a shorter time.

### 2.3 General Procedure for Preparation of Dehydroalanine Derivatives

#### General Procedure E:<sup>2</sup>

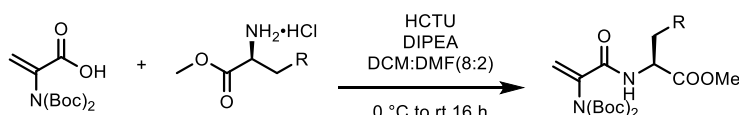

HCTU (*O*-(6-Chlorobenzotriazol-1-yl)-*N,N,N',N'*-tetramethyluronium hexafluorophosphate) (1.07 g, 2.61 mmol, 1.50 equiv) was added to a solution of 2-(di(*tert*-butoxycarbonyl)amino)acrylic acid<sup>2</sup> (0.500 g, 1.74 mmol, 1.00 equiv) in anhydrous DCM:DMF (16:4). The solution was cooled to 0 °C and stirred under N<sub>2</sub> for 0.5 h, then glycine methyl ester (1.74 mmol, 1.00 equiv) and DIPEA (*N,N*-Diisopropylethylamine) (0.454 mL, 2.61 mmol, 1.50 equiv) was added. After stirring at rt for another 16 hours, the crude material was quenched with water, extracted with EtOAc (3 × 20.0 mL) and washed with 1.0 M HCl solution (2 × 20.0 mL), sat. aq. NaHCO<sub>3</sub> solution (2 × 20.0 mL) and brine (20.0 mL). The organic layers were dried over MgSO<sub>4</sub>, filtered, and concentrated *in vacuo*. The residue was purified by flash column chromatography on SiO<sub>2</sub>.

#### General Procedure F:<sup>3</sup>

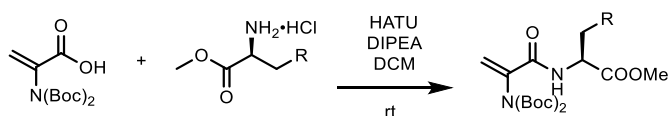

2-(Di(*tert*-butoxycarbonyl)amino)acrylic acid<sup>2</sup> (5.00 mmol, 1.00 equiv) was dissolved in anhydrous DCM

(10.0 mL), then glycine methyl ester (6.00 mmol, 1.20 equiv), HATU (2-(7-Aza-1*H*-benzotriazole-1-yl)-1,1,3,3-tetramethyluronium hexafluorophosphate) (3.80 g, 10.00 mmol, 2.00 equiv), and DIPEA (1.75 mL, 10.00 mmol, 2.00 equiv) were subsequently added. After stirring for 4 h, the mixture was diluted with DCM (10.0 mL) and washed with brine (20.0 mL). The combined organic layers were dried over MgSO<sub>4</sub> and concentrated *in vacuo*. The residue was purified by column chromatography on SiO<sub>2</sub>.

### 3. Additional Reaction Optimization Conditions

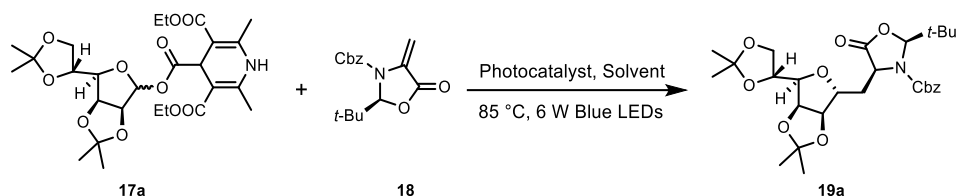

| Entry     | Catalyst                                                                      | 17a (equiv) | 18 (equiv)  | Solvent                              | Time        | Temperature  | Yield      |
|-----------|-------------------------------------------------------------------------------|-------------|-------------|--------------------------------------|-------------|--------------|------------|
| 1         | Ir[dF(CF <sub>3</sub> )ppy] <sub>2</sub> (dtbbpy)PF <sub>6</sub> (2.0 mol%)   | 1.50        | 1.00        | MeCN (2.0 mL)                        | 10 h        | 85 °C        | 52%        |
| 2         | Ir[dF(CF <sub>3</sub> )ppy] <sub>2</sub> (dtbbpy)PF <sub>6</sub> (2.0 mol%)   | 1.50        | 1.00        | DMSO (2.0 mL)                        | 10 h        | 85 °C        | ND         |
| 3         | Ir[dF(CF <sub>3</sub> )ppy] <sub>2</sub> (dtbbpy)PF <sub>6</sub> (2.0 mol%)   | 1.50        | 1.00        | Dioxane (2.0 mL)                     | 10 h        | 85 °C        | 69%        |
| 4         | Ir[dF(CF <sub>3</sub> )ppy] <sub>2</sub> (dtbbpy)PF <sub>6</sub> (2.0 mol%)   | 1.50        | 1.00        | DMA (2.0 mL)                         | 10 h        | 85 °C        | 7%         |
| 5         | Ir[dF(CF <sub>3</sub> )ppy] <sub>2</sub> (dtbbpy)PF <sub>6</sub> (2.0 mol%)   | 1.50        | 1.00        | DMF (2.0 mL)                         | 10 h        | 85 °C        | 9%         |
| 6         | Ir[dF(CF <sub>3</sub> )ppy] <sub>2</sub> (dtbbpy)PF <sub>6</sub> (2.0 mol%)-  | 1.50        | 1.00        | THF (2.0 mL)                         | 10 h        | 85 °C        | 33%        |
| 7         | Ir[dF(CF <sub>3</sub> )ppy] <sub>2</sub> (dtbbpy)PF <sub>6</sub> (2.0 mol%)-  | 1.00        | 1.50        | Dioxane (2.0 mL)                     | 10 h        | 85 °C        | 36%        |
| 8         | Ir[dF(CF <sub>3</sub> )ppy] <sub>2</sub> (dtbbpy)PF <sub>6</sub> (2.0 mol%)-  | 1.50        | 1.00        | Dioxane (2.0 mL)                     | 10 h        | 60 °C        | 35%        |
| 9         | Ir[dF(CF <sub>3</sub> )ppy] <sub>2</sub> (dtbbpy)PF <sub>6</sub> (2.0 mol%)-  | 1.50        | 1.00        | Dioxane (2.0 mL)                     | 10 h        | 75 °C        | 63%        |
| 10        | Ir[dF(CF <sub>3</sub> )ppy] <sub>2</sub> (dtbbpy)PF <sub>6</sub> (2.0 mol%)-  | 1.50        | 1.00        | Dioxane (2.0 mL)                     | 10 h        | 100 °C       | 60%        |
| 11        | Ir(ppy) <sub>3</sub>                                                          | 1.50        | 1.00        | Dioxane (2.0 mL)                     | 10 h        | 85 °C        | ND         |
| 12        | Ru(bpy) <sub>3</sub> Cl <sub>2</sub>                                          | 1.50        | 1.00        | Dioxane (2.0 mL)                     | 10 h        | 85 °C        | NR         |
| 13        | 9,10-Diphenylanthracene                                                       | 1.50        | 1.00        | Dioxane (2.0 mL)                     | 10 h        | 85 °C        | NR         |
| 14        | 4CzIPN (2.0 mol%)-                                                            | 1.50        | 1.00        | Dioxane (2.0 mL)                     | 10 h        | 85 °C        | 7%         |
| 15        | 4CzIPN (2.0 mol%)                                                             | 1.50        | 1.00        | MeCN (2.0 mL)                        | 10 h        | 85 °C        | 64%        |
| 16        | 4CzIPN (2.5 mol%)                                                             | 1.50        | 1.00        | MeCN (2.0 mL)                        | 10 h        | 85 °C        | 70%        |
| 17        | Ir[dF(CF <sub>3</sub> )ppy] <sub>2</sub> (dtbbpy)PF <sub>6</sub> (2.0 mol%)   | 1.50        | 1.00        | Dioxane (1.0 mL)                     | 10 h        | 85 °C        | 54%        |
| <b>18</b> | <b>Ir[dF(CF<sub>3</sub>)ppy]<sub>2</sub>(dtbbpy)PF<sub>6</sub> (2.0 mol%)</b> | <b>1.50</b> | <b>1.00</b> | <b>Dioxane (3.0 mL)</b>              | <b>10 h</b> | <b>85 °C</b> | <b>80%</b> |
| 19        | 4CzIPN (2.5 mol%)                                                             | 1.50        | 1.00        | MeCN (2.0 mL)                        | 20 h        | 85 °C        | 82%        |
| <b>20</b> | <b>4CzIPN (2.5 mol%)</b>                                                      | <b>1.50</b> | <b>1.00</b> | <b>MeCN (3.0 mL)</b>                 | <b>20 h</b> | <b>85 °C</b> | <b>85%</b> |
| 21        | 4CzIPN (2.5 mol%)                                                             | 1.50        | 1.00        | MeCN : H <sub>2</sub> O=2:1 (3.0 mL) | 20 h        | 85 °C        | 78%        |

## 4. Detailed Experimental Procedures for the Coupling of Glycosyl Esters with Chiral Dehydroalanines

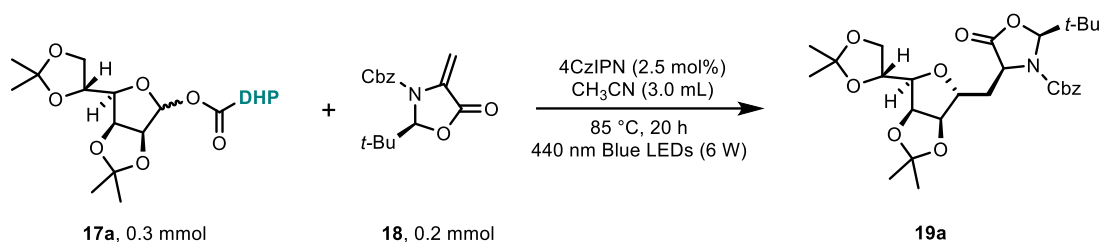

### Benzyl (2*S*,4*S*)-2-(*tert*-butyl)-4-(((3*aR*,4*S*,6*R*,6*aS*)-6-((*R*)-2,2-dimethyl-1,3-dioxolan-4-yl)-2,2-dimethyltetrahydrofuro[3,4-*d*][1,3]dioxol-4-yl)methyl)-5-oxooxazolidine-3-carboxylate (19a).

According to the general procedure A, 4-((3*aS*,4*R*,6*R*,6*aS*)-6-((*S*)-2,2-dimethyl-1,3-dioxolan-4-yl)-2,2-dimethyltetrahydrofuro[3,4-*d*][1,3]dioxol-4-yl) 3,5-diethyl 2,6-dimethyl-1,4-dihydropyridine-3,4,5-tricarboxylate<sup>1</sup> **17a** (162 mg, 0.300 mmol, 1.50 equiv), benzyl (*S*)-2-(*tert*-butyl)-4-methylene-5-oxooxazolidine-3-carboxylate<sup>4</sup> **18** (58.0 mg, 0.200 mmol, 1.00 equiv) and 4CzIPN (4.0 mg, 0.005 mmol, 0.0250 equiv) were added to anhydrous CH<sub>3</sub>CN (3.00 mL). The reaction mixture was stirred at 85 °C under 6W blue LED irradiation for 20 h and afforded after chromatographic purification on SiO<sub>2</sub> (Petroleum ether: EtOAc = 6:1) **19a** (90.8 mg, 85%, d.r. >20:1) as a colorless oil:  $[\alpha]_D^{25} = +16.6$  ( $c = 0.740$ , CHCl<sub>3</sub>); <sup>1</sup>H NMR (400 MHz, CDCl<sub>3</sub>) δ 7.42 – 7.30 (m, 5H), 5.54 (s, 1H), 5.21 (d,  $J = 1.9$  Hz, 2H), 4.77 (dd,  $J = 6.0, 3.7$  Hz, 1H), 4.57 (d,  $J = 6.0$  Hz, 2H), 4.54 – 4.45 (m, 1H), 4.45 – 4.36 (m, 1H), 4.14 – 4.01 (m, 2H), 3.83 (dd,  $J = 7.7, 3.7$  Hz, 1H), 2.06 – 1.87 (m, 2H), 1.50 (s, 3H), 1.44 (s, 3H), 1.38 (s, 3H), 1.33 (s, 3H), 0.94 (s, 9H); <sup>13</sup>C NMR (101 MHz, CDCl<sub>3</sub>) δ 172.2, 155.8, 135.7, 128.8, 128.7, 112.9, 109.3, 96.4, 85.1, 80.7, 80.6, 80.5, 73.4, 68.4, 67.1, 54.0, 37.2, 33.9, 27.0, 26.2, 25.3, 24.9, 24.8; HRMS (ESI)  $m/z$  calcd for C<sub>28</sub>H<sub>39</sub>O<sub>9</sub>NNa [M + Na]<sup>+</sup> 556.2517, found 556.2522.

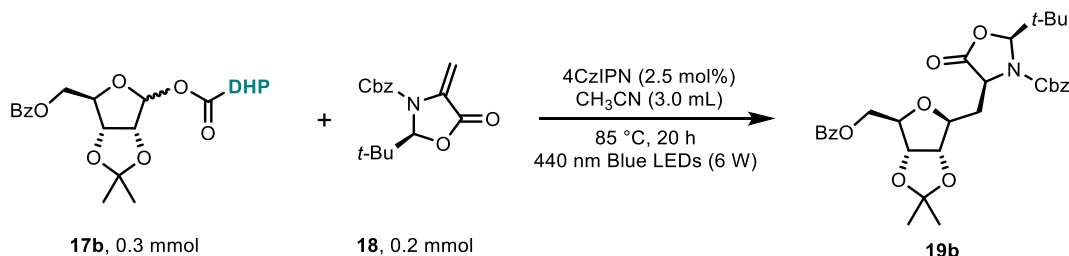

**Benzyl (2*S*,4*S*)-4-(((3*aS*,4*S*,6*R*,6*aR*)-6-((benzoyloxy)methyl)-2,2-dimethyltetrahydrofuro[3,4-*d*][1,3]dioxol-4-yl)methyl)-2-(*tert*-butyl)-5-oxooxazolidine-3-carboxylate (19b).** According to the general protocol A, 4-((3*aR*,6*R*,6*aR*)-6-((benzoyloxy)methyl)-2,2-dimethyltetrahydrofuro[3,4-*d*][1,3]dioxol-4-yl) 3,5-diethyl 2,6-dimethyl-1,4-dihydropyridine-3,4,5-tricarboxylate **17b**<sup>1</sup> (172 mg, 0.300 mmol, 1.50 equiv), benzyl (*S*)-2-(*tert*-butyl)-4-methylene-5-oxooxazolidine-3-carboxylate<sup>4</sup> **18** (58.0 mg, 0.200 mmol, 1.00 equiv), 4CzIPN (4.0 mg, 0.005 mmol, 0.0250 equiv) were added to anhydrous CH<sub>3</sub>CN (3.00 mL). The reaction mixture was stirred at 85 °C under 6W blue LED irradiation for 20 h and afforded after chromatographic purification on SiO<sub>2</sub> (Petroleum ether: EtOAc = 5:1) **19b** (89.0 mg, 78%, d.r. = 5.3:1, major β) as a light yellow oil: <sup>1</sup>H NMR (400 MHz, CDCl<sub>3</sub>) δ 8.06 – 8.02 (m, 2H), 7.59 – 7.55 (m, 1H), 7.48 – 7.43 (m, 2H), 7.39 – 7.32 (m, 5H), 5.58 – 5.57 (m, 1H), 5.16 – 5.13 (m, 2H), 4.61 – 4.51 (m, 2H), 4.49 – 4.33 (m, 3.20H), 4.25 – 4.22 (m, 1H), 4.09 – 4.05 (m, 0.80H), 2.29 – 2.22 (m, 1.20H), 2.07 – 2.00 (m, 0.80H), 1.52 (s, 2.40H), 1.45 (s, 0.60H), 1.30 – 1.26 (m, 3H), 0.98 (s, 1.80H), 0.95 (s, 7.20H); <sup>13</sup>C NMR (101 MHz, CDCl<sub>3</sub>) δ 172.5, 166.4, 156.0, 135.2, 133.3, 129.9(2), 129.8, 128.9(2), 128.8, 128.7, 128.6, 115.1, 113.0, 96.6, 84.6, 83.3, 82.2, 81.8,

81.6, 80.7, 68.8, 64.6, 54.0, 37.6, 37.2, 27.6, 26.4, 25.8, 25.2, 25.1, 25.0; **HRMS** (ESI)  $m/z$  calcd for  $C_{31}H_{37}NNaO_9$   $[M + Na]^+$  590.2361, found 590.2364.

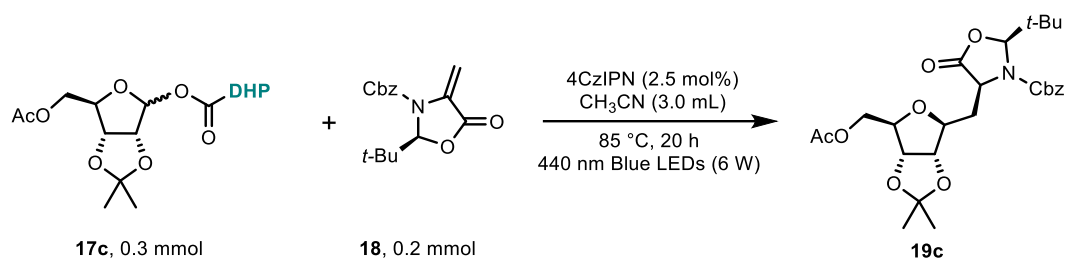

**Benzyl (2*S*,4*S*)-4-(((3*aS*,4*S*,6*R*,6*aR*)-6-(acetoxymethyl)-2,2-dimethyltetrahydrofuro[3,4-*d*][1,3]dioxol-4-yl)methyl)-2-(*tert*-butyl)-5-oxooxazolidine-3-carboxylate (**19c**).** According to the general protocol A, 4-(((3*aR*,6*R*,6*aR*)-6-(acetoxymethyl)-2,2-dimethyltetrahydrofuro[3,4-*d*][1,3]dioxol-4-yl) 3,5-diethyl 2,6-dimethyl-1,4-dihydropyridine-3,4,5-tricarboxylate **17c** (153.3 mg, 0.300 mmol, 1.50 equiv), benzyl (*S*)-2-(*tert*-butyl)-4-methylene-5-oxooxazolidine-3-carboxylate<sup>4</sup> **18** (58.0 mg, 0.200 mmol, 1.00 equiv), 4CzIPN (4.0 mg, 0.005 mmol, 0.0250 equiv) were added to anhydrous  $CH_3CN$  (3.00 mL). The reaction mixture was stirred at 85 °C under 6W blue LED irradiation for 20 h and afforded after chromatographic purification on  $SiO_2$  (Petroleum ether: EtOAc = 5:1) **19c** (80.0 mg, 79%, d.r. = 5.3:1, major  $\beta$ ) as a light yellow oil: **<sup>1</sup>H NMR** (400 MHz,  $CDCl_3$ )  $\delta$  7.40 – 7.34 (m, 5H), 5.58 (s, 1H), 5.19 – 5.17 (m, 2H), 4.67 – 4.31 (m, 3.17H), 4.23 – 4.13 (m, 1.83H), 4.09 – 3.95 (m, 2H), 2.28 – 2.21 (m, 1H), 2.07 – 2.06 (m, 3H), 2.04 – 1.97 (m, 1H), 1.50 (s, 2.5H), 1.43 (s, 0.5H), 1.30 – 1.28 (m, 3H), 0.98 – 0.96 (m, 9H); **<sup>13</sup>C NMR** (101 MHz,  $CDCl_3$ )  $\delta$  172.5, 170.9, 156.1, 135.2, 128.9, 128.9, 115.1, 96.6, 84.7, 82.1, 81.7, 80.7, 68.7, 64.3, 54.0, 37.5, 37.2, 27.5, 25.7, 25.0, 21.0; **HRMS** (ESI)  $m/z$  calcd for  $C_{26}H_{35}NNaO_9$   $[M + Na]^+$  528.2204, found 528.2202.

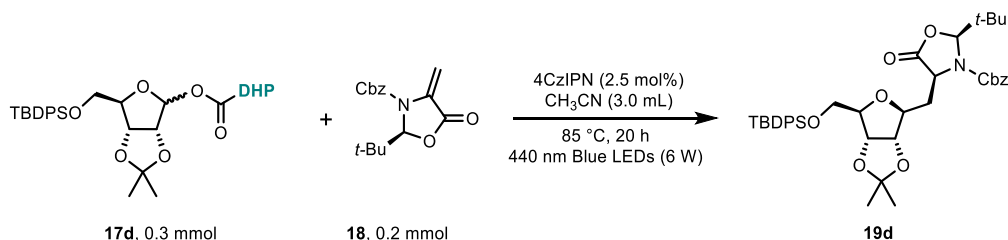

**Benzyl (2*S*,4*S*)-2-(*tert*-butyl)-4-(((3*aS*,4*S*,6*R*,6*aR*)-6-(((*tert*-butyldiphenylsilyl)oxy)methyl)-2,2-dimethyltetrahydrofuro[3,4-*d*][1,3]dioxol-4-yl)methyl)-5-oxooxazolidine-3-carboxylate (**19d**).** According to the general procedure A, 4-(((3*aR*,6*R*,6*aR*)-6-(((*tert*-butyldiphenylsilyl)oxy)methyl)-2,2-dimethyltetrahydrofuro[3,4-*d*][1,3]dioxol-4-yl) 3,5-diethyl 2,6-dimethyl-1,4-dihydropyridine-3,4,5-tricarboxylate<sup>1</sup> **17d** (212 mg, 0.300 mmol, 1.50 equiv), benzyl (*S*)-2-(*tert*-butyl)-4-methylene-5-oxooxazolidine-3-carboxylate<sup>4</sup> **18** (58.0 mg, 0.200 mmol, 1.00 equiv) and 4CzIPN (4.0 mg, 0.005 mmol, 0.0250 equiv) were added to anhydrous  $CH_3CN$  (3.00 mL). The reaction mixture was stirred at 85 °C under 6W blue LED irradiation for 20 h and afforded after chromatographic purification on  $SiO_2$  (Petroleum ether: EtOAc = 6:1) **19d** (77.6 mg, 57%, d.r. = 3.2:1, major  $\beta$ ) as a colorless oil: **<sup>1</sup>H NMR** (400 MHz,  $CDCl_3$ )  $\delta$  7.73 – 7.66 (m, 4H), 7.46 – 7.30 (m, 11H), 5.59 (d,  $J = 2.7$  Hz, 1H), 5.21 – 5.11 (m, 2H), 4.83 (d,  $J = 5.9$  Hz, 0.24H), 4.70 – 4.61 (m, 1H), 4.53 (t,  $J = 6.6$  Hz, 1H), 4.30 (t,  $J = 6.0$  Hz, 0.68H), 4.18 (q,  $J = 6.6$  Hz, 0.78H), 4.11 (t,  $J = 4.4$  Hz, 0.27H), 3.88 (d,  $J = 4.1$  Hz, 0.74H), 3.75 – 3.62 (m, 2H), 2.27 (dt,  $J = 14.1, 7.2$  Hz, 1H), 2.04 (dt,  $J = 13.5, 6.6$  Hz, 1H), 1.47 (d,  $J = 26.7$  Hz, 3H), 1.32 (d,  $J = 9.6$  Hz, 3H), 1.07 (d,  $J = 3.8$  Hz, 9H), 0.98 (d,  $J = 7.5$  Hz, 9H); **<sup>13</sup>C NMR** (101 MHz,  $CDCl_3$ )  $\delta$  172.5, 172.4, 156.1 (2), 135.8, 135.7, 135.3, 135.2,

133.5, 133.3, 133.1, 132.9, 130.0, 129.9(2), 129.8, 128.8 (2), 128.5, 128.2, 127.9, 127.8 (2), 114.4, 112.5, 96.6, 96.4, 84.8, 84.2, 84.1, 83.5, 82.0 (2), 80.5, 68.6, 68.3, 65.1, 64.2, 54.7, 54.1, 37.8, 37.1, 33.5, 29.8, 27.6, 27.0, 26.4, 25.8, 25.2, 25.0 (2), 19.4, 19.2; **HRMS** (ESI)  $m/z$  calcd for  $C_{40}H_{51}O_8NNaSi$   $[M + Na]^+$  724.3276, found 724.3283.

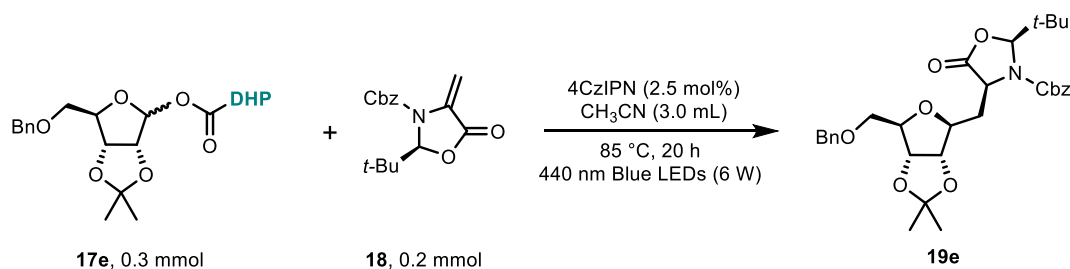

**Benzyl**                      **(2*S*,4*S*)-4-(((3*aS*,4*S*,6*R*,6*aR*)-6-((benzyloxy)methyl)-2,2-dimethyltetrahydrofuro[3,4-*d*][1,3]dioxol-4-yl)methyl)-2-(*tert*-butyl)-5-oxooxazolidine-3-carboxylate (19e).** According to the general protocol A, 4-(((3*aR*,6*R*,6*aR*)-6-((benzyloxy)methyl)-2,2-dimethyltetrahydrofuro[3,4-*d*][1,3]dioxol-4-yl) 3,5-diethyl 2,6-dimethyl-1,4-dihydropyridine-3,4,5-tricarboxylate<sup>1</sup> **17e** (158.7 mg, 0.300 mmol, 1.50 equiv), benzyl (*S*)-2-(*tert*-butyl)-4-methylene-5-oxooxazolidine-3-carboxylate<sup>4</sup> **18** (58.0 mg, 0.20 mmol, 1.00 equiv), 4CzIPN (4.0 mg, 0.005 mmol, 0.0250 equiv) were added to anhydrous  $CH_3CN$  (3.00 mL). The reaction mixture was stirred at 85 °C under 6W blue LED irradiation for 20 h and afforded after chromatographic purification on  $SiO_2$  (Petroleum ether: EtOAc = 6:1) **19e** (82.0 mg, 75%, d.r. = 4.3:1, major  $\beta$ ) as a light yellow oil: **<sup>1</sup>H NMR** (400 MHz,  $CDCl_3$ )  $\delta$  7.37 – 7.27 (m, 10H), 5.59 (s, 0.11H), 5.57 (s, 0.89H), 5.18 – 5.11 (m, 2H), 4.62 – 4.47 (m, 4.11H), 4.31 – 4.16 (m, 2H), 4.01 – 3.98 (m, 0.91H), 3.53 – 3.49 (m, 2H), 2.32 – 2.20 (m, 1.11H), 2.05 – 1.99 (m, 0.89H), 1.49 (s, 2.67H), 1.42 (s, 0.33H), 1.27 (s, 3H), 0.99 (s, 0.99H), 0.96 (s, 8.01H); **<sup>13</sup>C NMR** (101 MHz,  $CDCl_3$ )  $\delta$  172.6, 156.0, 138.1, 135.3, 128.9, 128.8, 128.5, 128.0, 127.8, 114.6, 96.5, 84.8, 83.3, 82.6, 81.0, 73.7, 70.6, 68.6, 54.1, 37.7, 37.2, 27.5, 25.7, 25.0; **HRMS** (ESI)  $m/z$  calcd for  $C_{31}H_{39}NNaO_8$   $[M + Na]^+$  576.2568, found 576.2573.

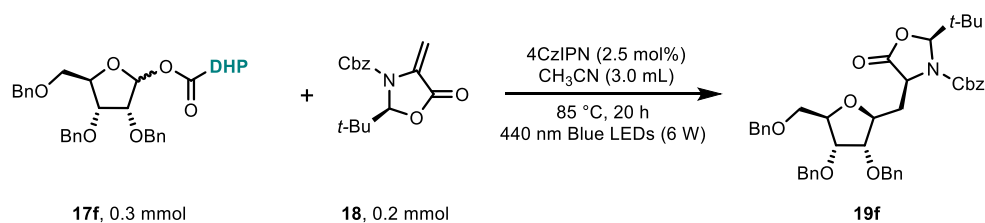

**Benzyl**                      **(2*S*,4*S*)-4-(((2*S*,3*S*,4*R*,5*R*)-3,4-bis(benzyloxy)-5-((benzyloxy)methyl)tetrahydrofuran-2-yl)methyl)-2-(*tert*-butyl)-5-oxooxazolidine-3-carboxylate (19f).** According to the general procedure A, 4-(((3*R*,4*R*,5*R*)-3,4-bis(benzyloxy)-5-((benzyloxy)methyl)tetrahydrofuran-2-yl) 3,5-diethyl 2,6-dimethyl-1,4-dihydropyridine-3,4,5-tricarboxylate<sup>1</sup> **17f** (210 mg, 0.300 mmol, 1.50 equiv), benzyl (*S*)-2-(*tert*-butyl)-4-methylene-5-oxooxazolidine-3-carboxylate<sup>4</sup> **18** (58.0 mg, 0.200 mmol, 1.00 equiv) and 4CzIPN (4.0 mg, 0.005 mmol, 0.0250 equiv) were added to anhydrous  $CH_3CN$  (3.00 mL). The reaction mixture was stirred at 85 °C under 6W blue LED irradiation for 20 h and afforded after chromatographic purification on  $SiO_2$  (Petroleum ether: EtOAc = 6:1) **19f** (120 mg, 87%, d.r. = 3.5:1, major  $\beta$ ) as a colorless oil: **<sup>1</sup>H NMR** (400 MHz,  $CDCl_3$ )  $\delta$  7.42 – 7.22 (m, 20H), 5.58 (s, 1H), 5.13 (q,  $J$  = 12.0 Hz, 2.22H), 4.61 (t,  $J$  = 6.7 Hz, 1H), 4.57 (d,  $J$  = 2.6 Hz, 0.84H), 4.56 – 4.48 (m, 4.35H), 4.46 (d,  $J$  = 5.4 Hz, 0.65H), 4.36 (d,  $J$  = 11.8 Hz, 1H), 4.24 (q,  $J$  = 6.9 Hz, 1H), 3.95 (s, 1H), 3.89 (dd,  $J$  = 5.5, 3.3 Hz, 1H), 3.57 (dd,  $J$  = 7.3, 5.4 Hz, 1H), 3.43 (dd,  $J$  = 10.3,



3.9 Hz, 1H), 3.38 (dd,  $J = 10.3, 4.9$  Hz, 1H), 2.04 (d,  $J = 6.2$  Hz, 2H), 0.96 (s, 9H);  $^{13}\text{C}$  NMR (101 MHz,  $\text{CDCl}_3$ )  $\delta$  172.9, 156.3, 138.3, 138.0, 137.9, 135.4, 128.8, 128.7, 128.6, 128.5, 128.5, 128.5, 128.4, 128.0, 127.9, 127.9, 127.8, 96.8, 81.9, 81.3, 76.5, 73.6, 72.2, 71.7, 70.6, 68.6, 54.5, 37.9, 37.0, 29.8, 25.1, 25.0; **HRMS** (ESI)  $m/z$  calcd for  $\text{C}_{42}\text{H}_{47}\text{O}_8\text{NNa}$  [ $\text{M} + \text{Na}$ ] $^+$  716.3194, found 716.3198.

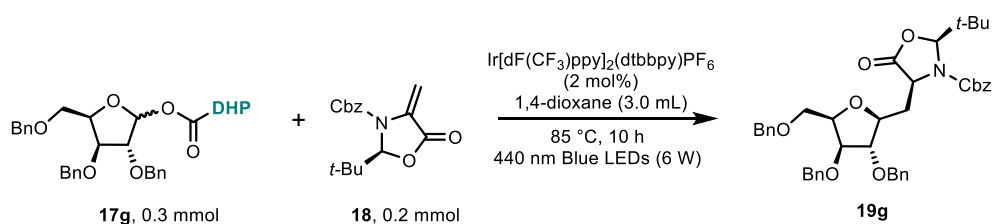

**Benzyl (2S,4S)-4-(((2S,3S,4S,5R)-3,4-bis(benzyloxy)-5-((benzyloxy)methyl)tetrahydrofuran-2-yl)methyl)-2-(tert-butyl)-5-oxooxazolidine-3-carboxylate (19g).** According to the general procedure B, 4-(((3R,4S,5R)-3,4-bis(benzyloxy)-5-((benzyloxy)methyl)tetrahydrofuran-2-yl) 3,5-diethyl 2,6-dimethyl-1,4-dihydropyridine-3,4,5-tricarboxylate<sup>1</sup> **17g** (210 mg, 0.300 mmol, 1.50 equiv), benzyl (*S*)-2-(*tert*-butyl)-4-methylene-5-oxooxazolidine-3-carboxylate<sup>4</sup> **18** (58.0 mg, 0.200 mmol, 1.00 equiv) and  $\text{Ir}[\text{dF}(\text{CF}_3)(\text{ppy})_2](\text{dtbbpy})\text{PF}_6$  (4.5 mg, 0.004 mmol, 0.020 equiv) were added to anhydrous 1,4-dioxane (3.00 mL). The reaction mixture was stirred at 85 °C under 6W blue LED irradiation for 10 h and afforded after chromatographic purification on  $\text{SiO}_2$  (Petroleum ether: EtOAc = 6:1) **19g** (114 mg, 82%, d.r. = 3.5:1, major  $\beta$ ) as a colorless oil:  $^1\text{H}$  NMR (400 MHz,  $\text{CDCl}_3$ )  $\delta$  7.38 – 7.24 (m, 20H), 5.57 (d,  $J = 7.1$  Hz, 1H), 5.22 – 5.07 (m, 2H), 4.63 – 4.38 (m, 7H), 4.37 – 4.28 (m, 0.3H), 4.28 – 4.10 (m, 1.76H), 4.07 – 3.88 (m, 2H), 3.83 – 3.66 (m, 2H), 2.36 (dt,  $J = 14.1, 7.1$  Hz, 0.84H), 2.31 – 2.21 (m, 0.29H), 2.06 (dt,  $J = 13.5, 6.4$  Hz, 0.83H), 0.97 (s, 9H);  $^{13}\text{C}$  NMR (101 MHz,  $\text{CDCl}_3$ )  $\delta$  172.6, 172.5, 156.1, 156.0, 138.4, 138.3, 138.0, 137.9 (2), 135.4, 128.7 (3), 128.5 (2), 128.4, 127.9 (2), 127.8 (2), 127.7 (2), 127.6, 96.5, 96.4, 86.4, 82.6, 81.5, 80.0, 79.8, 78.6, 73.6, 72.3, 72.0, 71.8, 71.7, 68.5, 68.4, 68.2, 54.9, 54.4, 38.1, 37.1, 37.0, 25.0; **HRMS** (ESI)  $m/z$  calcd for  $\text{C}_{42}\text{H}_{47}\text{O}_8\text{NNa}$  [ $\text{M} + \text{Na}$ ] $^+$  716.3194, found 716.3195.

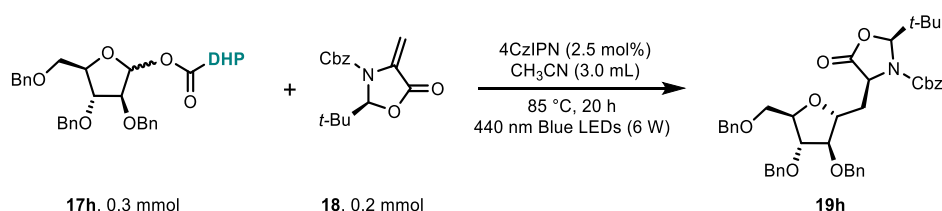

**Benzyl (2S,4S)-4-(((2S,3R,4R,5R)-3,4-bis(benzyloxy)-5-((benzyloxy)methyl)tetrahydrofuran-2-yl)methyl)-2-(tert-butyl)-5-oxooxazolidine-3-carboxylate (19h).** According to the general procedure A, 4-(((3S,4R,5R)-3,4-bis(benzyloxy)-5-((benzyloxy)methyl)tetrahydrofuran-2-yl) 3,5-diethyl 2,6-dimethyl-1,4-dihydropyridine-3,4,5-tricarboxylate<sup>1</sup> **17h** (210 mg, 0.300 mmol, 1.50 equiv), benzyl (*S*)-2-(*tert*-butyl)-4-methylene-5-oxooxazolidine-3-carboxylate<sup>4</sup> **18** (58.0 mg, 0.200 mmol, 1.00 equiv) and 4CzIPN (4.0 mg, 0.005 mmol, 0.0250 equiv) were added to anhydrous  $\text{CH}_3\text{CN}$  (3.00 mL). The reaction mixture was stirred at 85 °C under 6W blue LED irradiation for 20 h and afforded after chromatographic purification on  $\text{SiO}_2$  (Petroleum ether: EtOAc = 6:1) **19h** (114.6 mg, 80%, d.r. >20:1) as a colorless oil:  $[\alpha]_D^{25} = +30.9$  ( $c = 1.10$ ,  $\text{CHCl}_3$ );  $^1\text{H}$  NMR (400 MHz,  $\text{CDCl}_3$ )  $\delta$  7.41 – 7.28 (m, 20H), 5.59 (s, 1H), 5.26 – 5.11 (m, 2H), 4.70 – 4.47 (m, 8H), 4.23 – 4.13 (m, 1H), 4.06 (dd,  $J = 3.6, 2.0$  Hz, 1H), 3.89 (t,  $J = 2.5$  Hz, 1H), 3.62 – 3.49 (m, 2H), 2.41 – 2.27 (m, 1H), 2.10 – 1.98 (m, 1H), 1.00 (s, 9H);  $^{13}\text{C}$  NMR (101 MHz,  $\text{CDCl}_3$ )  $\delta$  172.6, 155.8, 138.3, 137.9, 137.8, 135.5, 128.7 (2), 128.5(3), 128.4, 127.8 (3), 127.6, 96.2, 87.5, 85.2, 81.9, 79.0, 73.5, 72.1, 71.8,

71.5, 70.4, 68.2, 53.9, 37.2, 36.4, 24.9, 24.8; **HRMS** (ESI)  $m/z$  calcd for  $C_{42}H_{47}O_8NNa$   $[M + Na]^+$  716.3194, found 716.3198.

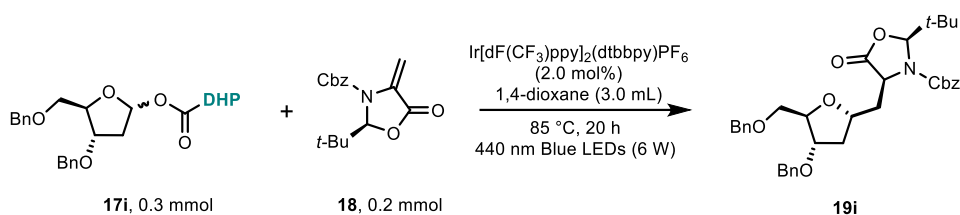

**Benzyl (2*S*,4*S*)-4-(((2*S*,4*S*,5*R*)-4-(benzyloxy)-5-((benzyloxy)methyl)tetrahydrofuran-2-yl)methyl)-2-(*tert*-butyl)-5-oxooxazolidine-3-carboxylate (**19i**).** According to the general procedure B, 4-(((4*S*,5*R*)-4-(benzyloxy)-5-((benzyloxy)methyl)tetrahydrofuran-2-yl) 3,5-diethyl 2,6-dimethyl-1,4-dihydropyridine-3,4,5-tricarboxylate<sup>1</sup> **17i** (178 mg, 0.300 mmol, 1.50 equiv), benzyl (*S*)-2-(*tert*-butyl)-4-methylene-5-oxooxazolidine-3-carboxylate<sup>4</sup> **18** (58.0 mg, 0.200 mmol, 1.00 equiv) and  $Ir[dF(CF_3)(ppy)]_2(dtbbpy)PF_6$  (4.5 mg, 0.004 mmol, 0.020 equiv) were added to anhydrous 1,4-dioxane (3.00 mL). The reaction mixture was stirred at 85 °C under 6W blue LED irradiation for 20 h and afforded after chromatographic purification on  $SiO_2$  (Petroleum ether: EtOAc = 5:1) **19i** (68.0 mg, 58%, d.r. = 1.9:1, major  $\alpha$ ) as a colorless oil: **<sup>1</sup>H NMR** (400 MHz,  $CDCl_3$ )  $\delta$  7.43 – 7.26 (m, 15H), 5.57 (s, 1H), 5.19 (dd,  $J$  = 12.0, 2.8 Hz, 1H), 5.11 (dd,  $J$  = 12.0, 5.3 Hz, 1H), 4.62 – 4.38 (m, 6H), 4.13 – 3.95 (m, 2H), 3.53 – 3.36 (m, 2H), 2.42 – 2.22 (m, 1.46H), 2.13 – 2.02 (m, 0.85H), 2.00 – 1.88 (m, 0.41H), 1.76 (d,  $J$  = 11.6 Hz, 1H), 0.97 – 0.96 (d, 9H); **<sup>13</sup>C NMR** (101 MHz,  $CDCl_3$ )  $\delta$  172.8, 172.6, 156.1, 156.0, 138.3 (3), 135.4, 135.3, 128.8 (2), 128.7, 128.6, 128.5 (2), 127.8, 127.7 (2), 96.7, 96.4, 83.4, 82.5, 81.3, 80.9, 75.3, 75.2, 73.6, 73.5, 71.5, 71.1 (2), 70.8, 68.6, 68.4, 55.0, 54.5, 39.5 (2), 38.2, 37.7, 37.2, 37.1, 25.0 (2); **HRMS** (ESI)  $m/z$  calcd for  $C_{35}H_{41}O_7NNa$   $[M + Na]^+$  610.2775, found 610.2777.

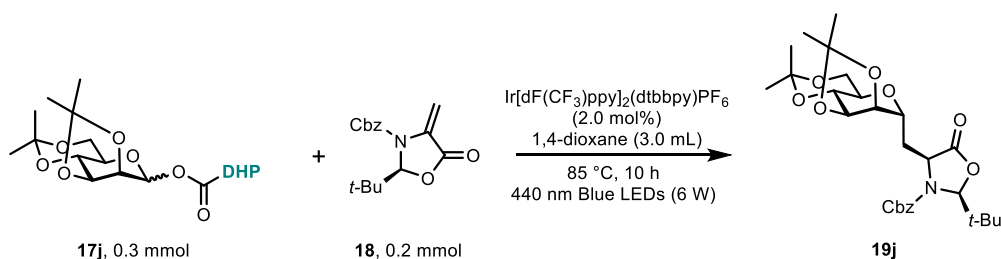

**Benzyl (2*S*,4*S*)-2-(*tert*-butyl)-5-oxo-4-(((3*aR*,4*R*,5*aR*,9*aR*,9*bR*)-2,2,8,8-tetramethylhexahydro-[1,3]dioxolo[4',5':4,5]pyrano[3,2-*d*][1,3]dioxin-4-yl)methyl)oxazolidine-3-carboxylate (**19j**).** According to the general procedure B, 3,5-diethyl 4-(((3*aS*,5*aR*,9*aR*,9*bS*)-2,2,8,8-tetramethylhexahydro-[1,3]dioxolo[4',5':4,5]pyrano[3,2-*d*][1,3]dioxin-4-yl) 2,6-dimethyl-1,4-dihydropyridine-3,4,5-tricarboxylate<sup>1</sup> **17j** (162 mg, 0.300 mmol, 1.50 equiv), benzyl (*S*)-2-(*tert*-butyl)-4-methylene-5-oxooxazolidine-3-carboxylate<sup>4</sup> **18** (58.0 mg, 0.200 mmol, 1.00 equiv) and  $Ir[dF(CF_3)(ppy)]_2(dtbbpy)PF_6$  (4.5 mg, 0.004 mmol, 0.020 equiv) were added to anhydrous 1,4-dioxane (3.00 mL). The reaction mixture was stirred at 85 °C under 6W blue LED irradiation for 10 h and afforded after chromatographic purification on  $SiO_2$  (Petroleum ether: EtOAc = 4:1) **19j** (48.4 mg, 45%, d.r. > 20:1) as a colorless oil:  $[\alpha]_D^{25} = +7.6$  ( $c$  = 0.380,  $CHCl_3$ ); **<sup>1</sup>H NMR** (400 MHz,  $CDCl_3$ )  $\delta$  7.43 – 7.32 (m, 5H), 5.55 (s, 1H), 5.21 (d,  $J$  = 1.9 Hz, 2H), 4.62 (dd,  $J$  = 10.3, 4.1 Hz, 1H), 4.52 – 4.43 (m, 1H), 4.15 (dd,  $J$  = 7.6, 6.3 Hz, 1H), 4.02 (dd,  $J$  = 6.3, 4.9 Hz, 1H), 3.96 (dd,  $J$  = 10.6, 7.6 Hz, 1H), 3.81 (dd,  $J$  = 10.8, 5.3 Hz, 1H), 3.69 (t,  $J$  = 10.4 Hz, 1H), 3.53 – 3.39 (m, 1H), 2.25 – 2.12 (m, 1H), 2.14 – 2.03 (m, 1H), 1.52 (d,  $J$  = 4.8 Hz, 6H), 1.45 (s, 3H), 1.34 (s, 3H), 0.96 (s, 9H); **<sup>13</sup>C NMR** (101 MHz,



CDCl<sub>3</sub>) δ 172.2, 155.7, 135.5, 128.8 (2), 128.6, 109.9, 99.7, 96.3, 76.7, 75.4, 72.6, 70.2, 68.4, 64.1, 62.9, 53.2, 37.3, 35.3, 29.2, 27.9, 25.7, 25.0, 19.1; **HRMS** (ESI) *m/z* calcd for C<sub>28</sub>H<sub>39</sub>O<sub>9</sub>NNa [M + Na]<sup>+</sup> 556.2517, found 556.2523.

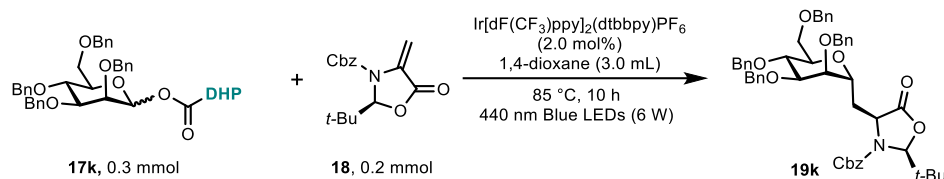

**Benzyl** **(2*S*,4*S*)-2-(*tert*-butyl)-5-oxo-4-(((2*R*,3*R*,4*R*,5*R*,6*R*)-3,4,5-tris(benzyloxy)-6-((benzyloxy)methyl)tetrahydro-2*H*-pyran-2-yl)methyl)oxazolidine-3-carboxylate (**19k**). According to the general protocol B, 3,5-diethyl 4-((3*S*,4*S*,5*R*,6*R*)-3,4,5-tris(benzyloxy)-6-((benzyloxy)methyl)tetrahydro-2*H*-pyran-2-yl) 2,6-dimethyl-1,4-dihydropyridine-3,4,5-tricarboxylate<sup>1</sup> **17k** (246 mg, 0.300 mmol, 1.50 equiv), benzyl (*S*)-2-(*tert*-butyl)-4-methylene-5-oxooxazolidine-3-carboxylate<sup>4</sup> **18** (58.0 mg, 0.200 mmol, 1.00 equiv), Ir[dF(CF<sub>3</sub>)ppy]<sub>2</sub>(dtbbpy)PF<sub>6</sub> (4.5 mg, 0.004 mmol, 0.020 equiv) were added to anhydrous 1,4-dioxane (3.00 mL). The reaction mixture was stirred at 85 °C under 6W Blue LEDs irradiation for 10 h and afforded after chromatographic purification on SiO<sub>2</sub> (Petroleum ether: EtOAc = 5:1) **19k** (104 mg, 63%, d.r. > 20:1) as a light yellow oil: [α]<sub>D</sub><sup>25</sup> = +21.1 (c = 0.8, CHCl<sub>3</sub>); <sup>1</sup>H NMR (400 MHz, CDCl<sub>3</sub>) δ 7.26 – 7.11 (m, 25H), 5.43 (s, 1H), 5.05 (d, *J* = 1.8 Hz, 2H), 4.63 (d, *J* = 11.3 Hz, 1H), 4.57 – 4.39 (m, 10H), 3.85 (t, *J* = 6.8 Hz, 1H), 3.79 – 3.76 (m, 1H), 3.68 – 3.64 (m, 2H), 3.61 – 3.58 (m, 1H), 3.49 (t, *J* = 3.8 Hz, 1H), 2.10 – 2.03 (m, 1H), 1.87 – 1.80 (m, 1H), 0.84 (s, 9H); <sup>13</sup>C NMR (101 MHz, CDCl<sub>3</sub>) δ 172.3, 155.7, 138.6, 138.5, 138.3, 138.2, 135.5, 128.8, 128.6, 128.4 (3), 128.0 (2), 127.9 (2), 127.7 (2), 127.5, 96.1, 76.2, 74.9, 74.0, 73.50, 72.16, 71.31, 69.25, 68.17, 53.36, 52.76, 37.17, 33.54, 24.94; **HRMS** (ESI) *m/z* calcd for C<sub>50</sub>H<sub>55</sub>NNaO<sub>9</sub> [M + Na]<sup>+</sup> 836.3769, found 836.3773.**

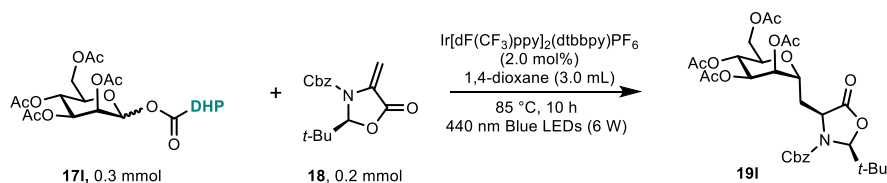

**(2*R*,3*R*,4*R*,5*R*,6*R*)-2-(Acetoxymethyl)-6-(((2*S*,4*S*)-3-((benzyloxy)carbonyl)-2-(*tert*-butyl)-5-oxooxazolidin-4-yl)methyl)tetrahydro-2*H*-pyran-3,4,5-triyl triacetate (**19l**). According to the general protocol B, 3,5-diethyl 4-((3*S*,4*S*,5*R*,6*R*)-3,4,5-triacetoxy-6-(acetoxymethyl)tetrahydro-2*H*-pyran-2-yl) 2,6-dimethyl-1,4-dihydropyridine-3,4,5-tricarboxylate<sup>1</sup> **17l** (188 mg, 0.300 mmol, 1.50 equiv), benzyl (*S*)-2-(*tert*-butyl)-4-methylene-5-oxooxazolidine-3-carboxylate<sup>4</sup> **18** (58.0 mg, 0.200 mmol, 1.00 equiv), Ir[dF(CF<sub>3</sub>)ppy]<sub>2</sub>(dtbbpy)PF<sub>6</sub> (4.5 mg, 0.004 mmol, 0.020 equiv) were added to anhydrous 1,4-dioxane (3.00 mL). The reaction mixture was stirred at 85 °C under 6W Blue LEDs irradiation for 10 h and afforded after chromatographic purification on SiO<sub>2</sub> (Petroleum ether: EtOAc = 5:1) **19l** (59.6 mg, 48%, d.r. > 20:1) as a light yellow oil: [α]<sub>D</sub><sup>25</sup> = +21.1 (c = 2.44, CHCl<sub>3</sub>); <sup>1</sup>H NMR (400 MHz, CDCl<sub>3</sub>) δ 7.39 – 7.31 (m, 5H), 5.53 (s, 1H), 5.23 – 5.12 (m, 5H), 4.57 – 4.52 (m, 2H), 4.16 – 4.01 (m, 3H), 2.45 – 2.37 (m, 1H), 2.10 (s, 3H), 2.04 (s, 3H), 2.03 (s, 3H), 2.00 (s, 3H), 1.98 – 1.93 (m, 1H), 0.93 (s, 9H); <sup>13</sup>C NMR (101 MHz, CDCl<sub>3</sub>) δ 171.7, 170.8, 170.2, 170.2, 169.6, 155.5, 135.1, 128.9, 128.6, 96.2, 70.6, 70.2, 68.9, 68.6, 66.5, 62.2, 52.6, 37.2, 31.8, 24.9, 20.9 (2), 20.8; **HRMS** (ESI) *m/z* calcd for C<sub>30</sub>H<sub>39</sub>NNaO<sub>13</sub> [M + Na]<sup>+</sup> 644.2314, found 644.2314.**

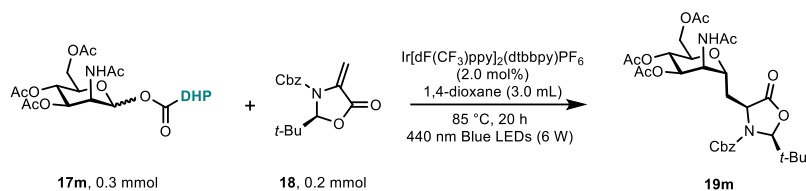

**(2*R*,3*S*,4*R*,5*R*,6*R*)-5-Acetamido-2-(acetoxymethyl)-6-(((2*S*,4*S*)-3-((benzyloxy)carbonyl)-2-(*tert*-butyl)-5-oxooxazolidin-4-yl)methyl)tetrahydro-2*H*-pyran-3,4-diyl diacetate (**19m**). According to the general procedure B, 4-(((3*S*,4*R*,5*S*,6*R*)-3-acetamido-4,5-diacetoxy-6-(acetoxymethyl)tetrahydro-2*H*-pyran-2-yl) 3,5-diethyl 2,6-dimethyl-1,4-dihydropyridine-3,4,5-tricarboxylate<sup>5</sup> **17m** (188 mg, 0.300 mmol, 1.50 equiv), benzyl (*S*)-2-(*tert*-butyl)-4-methylene-5-oxooxazolidine-3-carboxylate<sup>4</sup> **18** (58.0 mg, 0.200 mmol, 1.00 equiv), and Ir[dF(CF<sub>3</sub>)(ppy)<sub>2</sub>](dtbbpy)PF<sub>6</sub> (4.5 mg, 0.004 mmol, 0.020 equiv) were added to anhydrous 1,4-dioxane (3.00 mL). The reaction mixture was stirred at 85 °C under 6W blue LED irradiation for 20 h and afforded after chromatographic purification on SiO<sub>2</sub> (Petroleum ether: EtOAc = 1:3) **19m** (84.0 mg, 68%, d.r. > 20:1) as a light yellow oil: [α]<sub>D</sub><sup>25</sup> = +38.5 (c = 0.460, CHCl<sub>3</sub>); <sup>1</sup>H NMR (400 MHz, CDCl<sub>3</sub>) δ 7.42 – 7.32 (m, 5H), 5.96 (s, 1H), 5.55 (s, 1H), 5.18 (s, 2H), 5.13 – 5.01 (m, 2H), 4.56 – 4.36 (m, 3H), 4.32 – 3.90 (m, 3H), 2.56 – 2.41 (m, 1H), 2.09 – 1.99 (m, 13H), 0.94 (s, 9H); <sup>13</sup>C NMR (101 MHz, CDCl<sub>3</sub>) δ 172.0, 170.7, 170.3, 170.0, 169.8, 155.6, 135.1, 128.9, 128.5, 96.4, 70.7, 69.7, 68.6, 66.4, 62.0, 52.9, 49.3, 37.3, 33.0, 24.9, 24.8, 23.4, 21.0 (2), 20.9; HRMS (ESI) *m/z* calcd for C<sub>30</sub>H<sub>40</sub>O<sub>12</sub>N<sub>2</sub>Na [M + Na]<sup>+</sup> 643.2473, found 643.2477.**

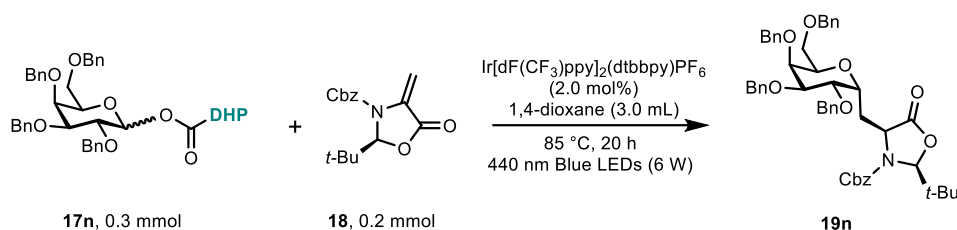

**Benzyl** **(2*S*,4*S*)-2-(*tert*-butyl)-5-oxo-4-(((2*R*,3*S*,4*R*,5*S*,6*R*)-3,4,5-tris(benzyloxy)-6-((benzyloxy)methyl)tetrahydro-2*H*-pyran-2-yl)methyl)oxazolidine-3-carboxylate (**19n**). According to the general procedure B, 3,5-diethyl 4-(((3*R*,4*S*,5*S*,6*R*)-3,4,5-tris(benzyloxy)-6-((benzyloxy)methyl)tetrahydro-2*H*-pyran-2-yl) 2,6-dimethyl-1,4-dihydropyridine-3,4,5-tricarboxylate<sup>1</sup> **17n** (246 mg, 0.300 mmol, 1.50 equiv), benzyl (*S*)-2-(*tert*-butyl)-4-methylene-5-oxooxazolidine-3-carboxylate<sup>4</sup> **18** (58.0 mg, 0.200 mmol, 1.00 equiv) and Ir[dF(CF<sub>3</sub>)(ppy)<sub>2</sub>](dtbbpy)PF<sub>6</sub> (4.5 mg, 0.004 mmol, 0.020 equiv) were added to anhydrous 1,4-dioxane (3.00 mL). The reaction mixture was stirred at 85 °C under 6W blue LED irradiation for 20 h and afforded after chromatographic purification on SiO<sub>2</sub> (Petroleum ether: EtOAc = 6:1) **19n** (83.0 mg, 51%, d.r. = 10.1:1, major α) as a colorless oil: <sup>1</sup>H NMR (400 MHz, CDCl<sub>3</sub>) δ 7.38 – 7.23 (m, 25H), 5.50 (s, 1H), 5.16 (d, *J* = 12.0 Hz, 1H), 5.02 (d, *J* = 12.1 Hz, 1H), 4.81 (d, *J* = 11.7 Hz, 1H), 4.76 – 4.67 (m, 3H), 4.66 – 4.53 (m, 3H), 4.52 – 4.40 (m, 3H), 4.00 (s, 1H), 3.87 – 3.63 (m, 3H), 3.61 – 3.45 (m, 2H), 2.33 – 2.20 (m, 1H), 2.10 – 1.96 (m, 1H), 0.94 – 0.89 (s, 9H); <sup>13</sup>C NMR (101 MHz, CDCl<sub>3</sub>) δ 172.4, 155.6, 138.8, 138.7, 138.6, 138.3, 135.7, 128.7, 128.6, 128.5 (3), 128.4 (2), 128.2, 128.1, 128.0, 127.9, 127.8, 127.7 (2), 127.6, 127.5, 95.9, 76.3, 74.4, 73.8, 73.5, 73.1 (2), 68.8, 68.4, 68.1, 53.2, 51.4, 37.3, 29.8, 24.9; HRMS (ESI) *m/z* calcd for C<sub>50</sub>H<sub>55</sub>O<sub>9</sub>NNa [M + Na]<sup>+</sup> 836.3769, found 836.3777.**

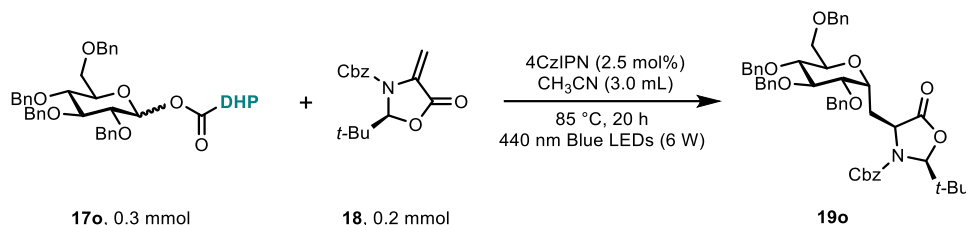

**Benzyl (2*S*,4*S*)-2-(*tert*-butyl)-5-oxo-4-(((2*R*,3*S*,4*R*,5*R*,6*R*)-3,4,5-tris(benzyloxy)-6-((benzyloxy)methyl)tetrahydro-2*H*-pyran-2-yl)methyl)oxazolidine-3-carboxylate (19o).** According to the general procedure A, 3-ethyl 4-((3*R*,4*S*,5*R*,6*R*)-3,4,5-tris(benzyloxy)-6-((benzyloxy)methyl)tetrahydro-2*H*-pyran-2-yl) 5-((ethylperoxy)-12-methyl)-2,6-dimethyl-1,4-dihydropyridine-3,4-dicarboxylate<sup>1</sup> **17o** (246 mg, 0.300 mmol, 1.50 equiv), benzyl (*S*)-2-(*tert*-butyl)-4-methylene-5-oxooxazolidine-3-carboxylate<sup>4</sup> **18** (58.0 mg, 0.200 mmol, 1.00 equiv) and 4CzIPN (4.0 mg, 0.005 mmol, 0.0250 equiv) were added to anhydrous CH<sub>3</sub>CN (3.00 mL). The reaction mixture was stirred at 85 °C under 6W blue LED irradiation for 20 h and afforded after chromatographic purification on SiO<sub>2</sub> (Petroleum ether: EtOAc = 5.7:1) **19o** (114 mg, 70%, d.r. = 5:1, major  $\alpha$ ) as a colorless oil: <sup>1</sup>H NMR (400 MHz, CDCl<sub>3</sub>)  $\delta$  7.37 – 7.15 (m, 25H), 5.58 (d, *J* = 13.6 Hz, 1H), 5.14 (s, 2H), 4.99 – 4.76 (m, 4H), 4.68 – 4.52 (m, 4H), 4.48 (d, *J* = 10.9 Hz, 1H), 4.43 (d, *J* = 12.2 Hz, 1H), 3.87 – 3.34 (m, 6H), 2.40 – 1.96 (m, 1H), 0.94 (d, *J* = 22.3 Hz, 9H); <sup>13</sup>C NMR (101 MHz, CDCl<sub>3</sub>)  $\delta$  173.1, 172.5, 156.6 (2), 138.9, 138.7, 138.6, 138.3, 138.0, 137.9, 135.4, 135.3, 128.92 (2), 128.8 (2), 128.7, 128.6, 128.5 (2), 128.4 (2), 128.3, 128.1, 128.0 (2), 127.9 (4), 127.8 (2), 127.7 (2), 97.0, 96.1, 87.5, 82.3, 82.0, 79.3, 78.8, 78.6, 77.9, 75.6, 75.2, 74.9, 73.6, 73.5, 72.8, 71.7, 69.9, 68.8, 68.5, 68.4, 54.2, 52.9, 37.3, 36.9, 29.8, 28.4, 25.2, 25.0; HRMS (ESI) *m/z* calcd for C<sub>50</sub>H<sub>55</sub>O<sub>9</sub>NNa [M + Na]<sup>+</sup> 836.3769, found 836.3780.

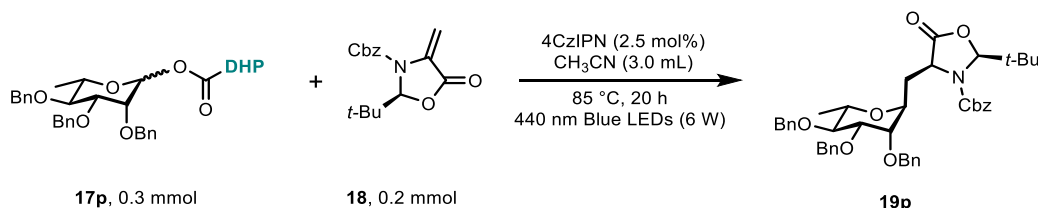

**Benzyl (2*S*,4*S*)-2-(*tert*-butyl)-5-oxo-4-(((2*S*,3*S*,4*R*,5*S*,6*S*)-3,4,5-tris(benzyloxy)-6-methyltetrahydro-2*H*-pyran-2-yl)methyl)oxazolidine-3-carboxylate (19p).** According to the general protocol A, 3,5-diethyl 4-((3*R*,4*R*,5*S*,6*S*)-3,4,5-tris(benzyloxy)-6-methyltetrahydro-2*H*-pyran-2-yl) 2,6-dimethyl-1,4-dihydropyridine-3,4,5-tricarboxylate **17p** (214 mg, 0.300 mmol, 1.50 equiv), benzyl (*S*)-2-(*tert*-butyl)-4-methylene-5-oxooxazolidine-3-carboxylate<sup>4</sup> **18** (58.0 mg, 0.200 mmol, 1.00 equiv) and 4CzIPN (4.0 mg, 0.005 mmol, 0.0250 equiv) were added to anhydrous CH<sub>3</sub>CN (3.00 mL). The reaction mixture was stirred at 85 °C under 6W Blue LEDs irradiation for 20 h and afforded after chromatographic purification on SiO<sub>2</sub> (Petroleum ether: EtOAc = 6:1) **19p** (102 mg, 72%, d.r. > 20:1) as a light yellow oil:  $[\alpha]_D^{25} = +19.9$  (c = 1.42, CHCl<sub>3</sub>); <sup>1</sup>H NMR (400 MHz, CDCl<sub>3</sub>)  $\delta$  7.38 – 7.27 (m, 20H), 5.56 (s, 1H), 5.22 – 5.11 (m, 2H), 4.78 (d, *J* = 11.3 Hz, 1H), 4.63 – 4.54 (m, 5H), 4.49 (dd, *J* = 6.8, 5.0 Hz, 1H), 4.39 – 4.35 (m, 1H), 3.85 – 3.79 (m, 1H), 3.74 (dd, *J* = 7.4, 3.1 Hz, 1H), 3.62 – 3.58 (m, 2H), 2.30 – 2.23 (m, 1H), 1.92 – 1.85 (m, 1H), 1.36 (d, *J* = 6.3 Hz, 3H), 0.93 (s, 9H); <sup>13</sup>C NMR (101 MHz, CDCl<sub>3</sub>)  $\delta$  172.8, 156.1, 138.6, 138.5, 138.3, 135.5, 128.8, 128.7(2), 128.5(2), 128.4, 128.1, 128.0, 127.9, 127.8(2), 96.6, 80.0, 77.9, 76.1, 74.3, 72.3, 71.6, 69.9, 69.8, 68.4, 54.5, 37.1, 34.6, 25.0, 18.1; HRMS (ESI) *m/z* calcd for C<sub>43</sub>H<sub>49</sub>NNaO<sub>8</sub> [M + Na]<sup>+</sup> 730.3350, found 730.3353.

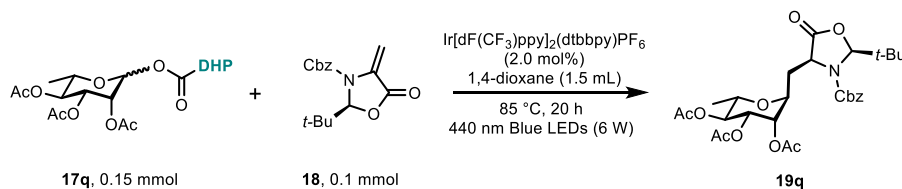

**(2*S*,3*S*,4*R*,5*S*,6*S*)-2-(((2*S*,4*S*)-3-((Benzyloxy)carbonyl)-2-(*tert*-butyl)-5-oxooxazolidin-4-yl)methyl)-6-methyltetrahydro-2*H*-pyran-3,4,5-triyl triacetate (**19q**).** According to the general procedure B, 3,5-diethyl 4-(((3*R*,4*R*,5*S*,6*S*)-3,4,5-triacetoxy-6-methyltetrahydro-2*H*-pyran-2-yl) 2,6-dimethyl-1,4-dihydropyridine-3,4,5-tricarboxylate **17q** (85.5 mg, 0.150 mmol, 1.50 equiv), benzyl (*S*)-2-(*tert*-butyl)-4-methylene-5-oxooxazolidine-3-carboxylate<sup>4</sup> **18** (29.0 mg, 0.100 mmol, 1.00 equiv) and Ir[dF(CF<sub>3</sub>)(ppy)<sub>2</sub>](dtbbpy)PF<sub>6</sub> (2.3 mg, 0.002 mmol, 0.020 equiv) were added to anhydrous 1,4-dioxane (1.50 mL). The reaction mixture was stirred at 85 °C under 6W blue LED irradiation for 20 h and afforded after chromatographic purification on SiO<sub>2</sub> (Petroleum ether: EtOAc = 3:1) to afford **19q** (16.0 mg, 28%, d.r. > 20:1) as a colorless oil:  $[\alpha]_D^{25} = +14.9$  ( $c = 0.770$ , CHCl<sub>3</sub>); <sup>1</sup>H NMR (400 MHz, CDCl<sub>3</sub>)  $\delta$  7.38 – 7.33 (m, 5H), 5.58 (s, 1H), 5.24 – 5.02 (m, 5H), 4.52 (dd,  $J = 6.2, 4.3$  Hz, 1H), 4.31 – 4.24 (m, 1H), 3.96 – 3.84 (m, 1H), 2.60 – 2.47 (m, 1H), 2.11 (s, 3H), 2.05 (s, 3H), 1.99 (s, 3H), 1.97 – 1.90 (m, 1H), 1.23 (d,  $J = 6.1$  Hz, 3H), 0.95 (s, 9H); <sup>13</sup>C NMR (101 MHz, CDCl<sub>3</sub>)  $\delta$  172.9, 170.4, 170.3, 170.1, 156.0, 135.2, 128.8 (2), 96.8, 73.0, 71.3, 70.6, 69.4, 68.8, 68.1, 54.4, 37.2, 33.6, 29.8, 24.9, 21.1, 21.0, 20.8, 17.8; HRMS (ESI)  $m/z$ :  $[M + Na]^+$  calcd for C<sub>28</sub>H<sub>37</sub>O<sub>11</sub>NNa 586.2259; found 586.2260.

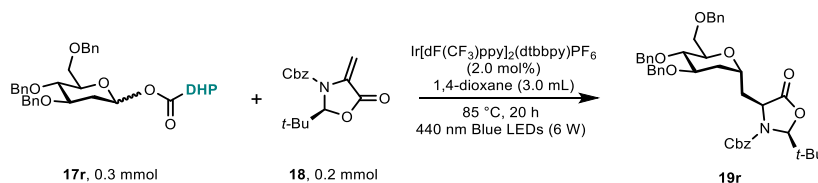

**Benzyl (2*S*,4*S*)-4-(((2*R*,4*R*,5*S*,6*R*)-4,5-bis(benzyloxy)-6-((benzyloxy)methyl)tetrahydro-2*H*-pyran-2-yl)methyl)-2-(*tert*-butyl)-5-oxooxazolidine-3-carboxylate (**19r**).** According to the general procedure B, 3-ethyl 4-(((3*R*,4*S*,5*R*,6*R*)-3,4,5-tris(benzyloxy)-6-((benzyloxy)methyl)tetrahydro-2*H*-pyran-2-yl) 5-((ethylperoxy)-1,2-methyl)-2,6-dimethyl-1,4-dihydropyridine-3,4-dicarboxylate<sup>1</sup> **17r** (214 mg, 0.300 mmol, 1.50 equiv), benzyl (*S*)-2-(*tert*-butyl)-4-methylene-5-oxooxazolidine-3-carboxylate<sup>4</sup> **18** (58.0 mg, 0.200 mmol, 1.00 equiv) and Ir[dF(CF<sub>3</sub>)(ppy)<sub>2</sub>](dtbbpy)PF<sub>6</sub> (4.5 mg, 0.004 mmol, 0.020 equiv) were added to anhydrous 1,4-dioxane (3.00 mL). The reaction mixture was stirred at 85 °C under 6W blue LED irradiation for 20 h and afforded after chromatographic purification on SiO<sub>2</sub> (Petroleum ether: EtOAc = 5:1) to afford **19r** (84.0 mg, 59%, d.r. >20:1) as a colorless oil:  $[\alpha]_D^{25} = +32.9$  ( $c = 0.770$ , CHCl<sub>3</sub>); <sup>1</sup>H NMR (400 MHz, CDCl<sub>3</sub>)  $\delta$  7.38 – 7.19 (m, 20H), 5.55 (s, 1H), 5.23 – 5.06 (m, 2H), 4.82 (d,  $J = 11.1$  Hz, 1H), 4.69 – 4.44 (m, 7H), 3.84 – 3.73 (m, 2H), 3.74 – 3.52 (m, 3H), 2.39 – 2.26 (m, 1H), 2.02 – 1.90 (m, 1H), 1.94 – 1.78 (m, 2H), 0.96 (s, 9H); <sup>13</sup>C NMR (101 MHz, CDCl<sub>3</sub>)  $\delta$  172.5, 155.7, 138.7, 138.6, 138.5, 135.4, 128.8, 128.7, 128.6, 128.5, 128.4, 128.0 (2), 127.9 (2), 127.7 (2), 127.6, 96.2, 74.3, 73.6, 72.9, 71.6, 69.2, 68.4, 67.4, 53.6, 37.2, 35.6, 33.4, 25.0; HRMS (ESI)  $m/z$  calcd for C<sub>43</sub>H<sub>49</sub>O<sub>8</sub>NNa  $[M + Na]^+$  730.3350, found 730.3356.

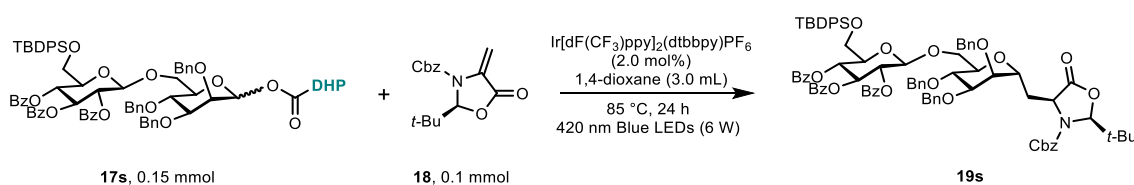

**(2*R*,3*R*,4*S*,5*R*,6*R*)-2-(((*tert*-Butyldiphenylsilyl)oxy)methyl)-6-(((2*R*,3*R*,4*R*,5*R*,6*R*)-3,4,5-tris(benzyloxy)-6-(((2*S*,4*S*)-3-((benzyloxy)carbonyl)-2-(*tert*-butyl)-5-oxooxazolidin-4-yl)methyl)tetrahydro-2*H*-pyran-2-yl)methoxy)tetrahydro-2*H*-pyran-3,4,5-triyl tribenzoate (**19s**). According to the general protocol B, 3,5-diethyl 4-(((2*R*,3*S*,4*S*,5*R*,6*R*)-3,4,5-tris(benzyloxy)-6-(((2*R*,3*R*,5*R*,6*R*)-3,4,5-tris(benzyloxy)-6-(((*tert*-butyldiphenylsilyl)oxy)methyl)tetrahydro-2*H*-pyran-2-yl)oxy)methyl)tetrahydro-2*H*-pyran-2-yl) 2,6-dimethyl-1,4-dihydropyridine-3,4,5-tricarboxylate **17s** (214 mg, 0.150 mmol, 1.50 equiv), benzyl (*S*)-2-(*tert*-butyl)-4-methylene-5-oxooxazolidine-3-carboxylate<sup>4</sup> **18** (29.0 mg, 0.100 mmol, 1.00 equiv), Ir[dF(CF<sub>3</sub>)ppy]<sub>2</sub>(dtbbpy)PF<sub>6</sub> (2.3 mg, 0.002 mmol, 0.020 equiv) were added to anhydrous 1,4-dioxane (3.00 mL). The reaction mixture was stirred at 85 °C under 6W Blue LEDs irradiation for 24 h and afforded after chromatographic purification on SiO<sub>2</sub> (Petroleum ether: EtOAc = 4:1) **19s** (103 mg, 72%, d.r. > 20:1) as a foam: [α]<sub>D</sub><sup>25</sup> = +1.4 (c = 2.21, CHCl<sub>3</sub>); <sup>1</sup>H NMR (400 MHz, CDCl<sub>3</sub>) δ 7.90 – 7.86 (m, 4H), 7.81 – 7.79 (m, 2H), 7.71 – 7.69 (m, 2H), 7.60 – 7.57 (m, 2H), 7.55 – 7.51 (m, 2H), 7.47 (t, *J* = 7.4 Hz, 1H), 7.40 – 7.17 (m, 33H), 5.85 (t, *J* = 9.7 Hz, 1H), 5.69 – 5.62 (m, 1H), 5.58 – 5.52 (m, 1H), 5.29 – 5.21 (m, 2H), 5.01 – 4.96 (m, 2H), 4.60 – 4.45 (m, 7H), 4.23 – 4.20 (m, 2H), 4.02 – 3.85 (m, 5H), 3.68 – 3.63 (m, 2H), 3.45 (dd, *J* = 5.4, 2.3 Hz, 1H), 2.05 – 1.98 (m, 1H), 1.87 – 1.80 (m, 1H), 1.01 (s, 9H), 0.90 (s, 9H); <sup>13</sup>C NMR (101 MHz, CDCl<sub>3</sub>) δ 171.9, 165.9, 165.1, 164.9, 155.0, 138.3, 138.1, 138.0, 135.6, 135.5, 133.2, 133.1, 133.0, 129.8 (2), 129.7, 129.6, 129.3, 129.1, 128.6, 128.6, 128.4 (2), 128.3, 128.2, 127.9 (2), 127.7 (2), 127.6, 127.6, 101.3, 95.6, 76.3, 75.3, 75.0, 73.5, 73.4, 73.2, 72.3, 72.0, 71.2, 69.4, 68.8, 67.7, 62.9, 37.1, 33.6, 26.7, 24.7, 19.2; HRMS (ESI) *m/z* calcd for C<sub>86</sub>H<sub>89</sub>NNa O<sub>17</sub>Si [M + Na]<sup>+</sup> 1458.5792, found 1458.5794.**

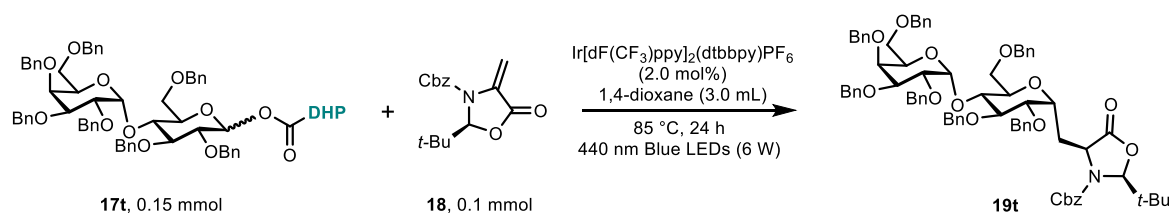

**Benzyl (2*S*,4*S*)-4-(((2*S*,3*S*,4*R*,5*R*,6*R*)-3,4-bis(benzyloxy)-6-((benzyloxy)methyl)-5-(((2*R*,3*R*,4*S*,5*S*,6*R*)-3,4,5-tris(benzyloxy)-6-((benzyloxy)methyl)tetrahydro-2*H*-pyran-2-yl)oxy)tetrahydro-2*H*-pyran-2-yl)methyl)-2-(*tert*-butyl)-5-oxooxazolidine-3-carboxylate (**19t**). According to the general protocol B, 4-(((3*R*,4*S*,5*R*,6*R*)-3,4-bis(benzyloxy)-6-((benzyloxy)methyl)-5-(((2*R*,3*R*,4*S*,5*S*,6*R*)-3,4,5-tris(benzyloxy)-6-((benzyloxy)methyl)tetrahydro-2*H*-pyran-2-yl)oxy)tetrahydro-2*H*-pyran-2-yl) 3,5-diethyl 2,6-dimethyl-1,4-dihydropyridine-3,4,5-tricarboxylate **17t** (188 mg, 0.150 mmol, 1.50 equiv), benzyl (*S*)-2-(*tert*-butyl)-4-methylene-5-oxooxazolidine-3-carboxylate<sup>4</sup> **18** (29.0 mg, 0.100 mmol, 1.00 equiv), Ir[dF(CF<sub>3</sub>)ppy]<sub>2</sub>(dtbbpy)PF<sub>6</sub> (2.3 mg, 0.002 mmol, 0.020 equiv) were added to anhydrous 1,4-dioxane (3.00 mL). The reaction mixture was stirred at 85 °C under 6W Blue LEDs irradiation for 24 h and afforded after chromatographic purification on SiO<sub>2</sub> (Petroleum ether: EtOAc = 5:1) **19t** (80.2 mg, 64%, d.r. = 5:1, major α) as a foam: <sup>1</sup>H NMR (400 MHz, CDCl<sub>3</sub>) δ 7.37 – 7.15 (m, 1H), 5.56 – 5.49 (m, 1H), 5.20 – 5.17 (m, 0.20H), 5.14 – 5.08 (m, 0.30H), 5.03 – 4.93 (m, 3H), 4.85 – 4.79 (m, 1.80H), 4.76 – 4.72 (m, 1H), 4.70 – 4.65 (m, 3.60H), 4.60 – 4.53 (m, 3.60H), 4.50 (s, 0.10H), 4.48 – 4.45 (m, 0.20H), 4.41 – 4.32 (m, 2.90H), 4.29 – 4.23 (m, , 1H), 4.17 (dd, *J* = 8.8, 6.2 Hz, 0.10H), 4.09 – 4.06 (m, 0.10H), 4.05 – 3.97 (m, 1H), 3.94 – 3.88 (m, 1.80H), 3.86 – 3.82 (m, 0.20H), 3.79 – 3.50 (m, 5.40H), 3.47 – 3.45 (m, 0.10H), 3.43 – 3.42 (m, 0.10H), 3.40 – 3.32 (m, 2.90H), 3.25 – 3.16 (m, 0.30H), 2.88 (dd, *J* = 16.0, 6.8 Hz, 0.10H), 2.71 (dd, *J* = 16.1, 5.7 Hz, 0.10H), 2.38 – 2.14 (m, 1.80H), 2.07 – 1.93 (m, 0.20H), 0.95 – 0.88 (m, , 9H) ; <sup>13</sup>C NMR (101 MHz, CDCl<sub>3</sub>) δ 173.1, 172.5, 156.6, 155.5, 139.4, 139.2, 139.0, 138.6, 138.4, 138.3, 138.2, 135.5, 128.8 (2), 128.7, 128.5 (2), 128.4 (2), 128.3 (3), 128.2, 128.1 (2), 128.0 (2), 127.9 (3), 127.8 (3), 127.7, 127.6 (3), 127.5 (2), 127.2,**



103.1, 102.7, 96.0, 82.6, 80.1, 80.0, 78.5, 77.0, 75.2, 74.8, 73.7, 73.5, 73.3, 73.1, 72.7, 71.9, 69.9, 68.6, 68.3, 54.3, 53.0, 37.3, 36.8, 28.8, 25.0; **HRMS** (ESI)  $m/z$  calcd for  $C_{77}H_{83}NNaO_{14}$   $[M + Na]^+$  1268.5706, found 1268.5718.

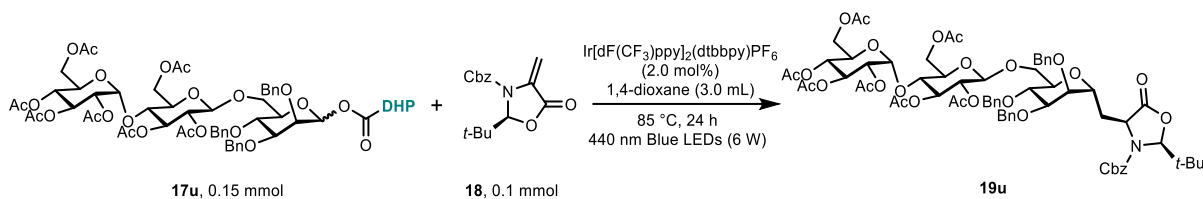

**(2*R*,3*R*,4*S*,5*R*,6*R*)-2-(Acetoxymethyl)-6-(((2*R*,3*R*,4*S*,5*R*,6*R*)-4,5-diacetoxy-2-(acetoxymethyl)-6-(((2*R*,3*R*,4*R*,5*R*,6*R*)-3,4,5-tris(benzyloxy)-6-(((2*S*,4*S*)-3-((benzyloxy)carbonyl)-2-(*tert*-butyl)-5-oxooxazolidin-4-yl)methyl)tetrahydro-2*H*-pyran-2-yl)methoxy)tetrahydro-2*H*-pyran-3-yl)oxy)tetrahydro-2*H*-pyran-3,4,5-triyl triacetate (**19u**). According to the general protocol B, 3,5-diethyl 4-((2*R*,3*S*,4*S*,5*R*,6*R*)-3,4,5-tris(benzyloxy)-6-(((2*R*,3*R*,4*S*,5*R*,6*R*)-3,4-diacetoxy-6-(acetoxymethyl)-5-(((2*R*,3*R*,4*S*,5*R*,6*R*)-3,4,5-triacetoxy-6-(acetoxymethyl)tetrahydro-2*H*-pyran-2-yl)oxy)tetrahydro-2*H*-pyran-2-yl)oxy)methyl)tetrahydro-2*H*-pyran-2-yl) 2,6-dimethyl-1,4-dihydropyridine-3,4,5-tricarboxylate **17u** (202 mg, 0.150 mmol, 1.50 equiv), benzyl (*S*)-2-(*tert*-butyl)-4-methylene-5-oxooxazolidine-3-carboxylate<sup>4</sup> **18** (29.0 mg, 0.100 mmol, 1.00 equiv), Ir[dF(CF<sub>3</sub>)ppy]<sub>2</sub>(dtbbpy)PF<sub>6</sub> (2.3 mg, 0.002 mmol, 0.020 equiv) were added to anhydrous 1,4-dioxane (3.00 mL). The reaction mixture was stirred at 85 °C under 6W Blue LEDs irradiation for 24 h and afforded after chromatographic purification on SiO<sub>2</sub> (Petroleum ether: EtOAc = 1.5:1) **19u** (101 mg, 75%, d.r. > 20:1) as a foam:  $[\alpha]_D^{25} = +24.1$  ( $c = 1.84$ , CHCl<sub>3</sub>); **<sup>1</sup>H NMR** (400 MHz, CDCl<sub>3</sub>)  $\delta$  7.39 – 7.22 (m, 20H), 5.61 (s, 1H), 5.41 – 5.33 (m, 3H), 5.22 (t,  $J = 9.3$  Hz, 1H), 5.08 – 5.03 (m, 2H), 4.86 – 4.77 (m, 2H), 4.74 – 4.39 (m, 10H), 4.26 – 4.18 (m, 2H), 4.05 – 3.63 (m, 9H), 3.53 – 3.51 (m, 1H), 2.16 – 1.94 (m, 20H), 1.90 (s, 3H), 0.94 (s, 9H); **<sup>13</sup>C NMR** (101 MHz, CDCl<sub>3</sub>)  $\delta$  172.8, 170.7(2), 170.6, 170.1(3), 169.6, 138.4, 138.2, 138.1, 135.6, 128.8, 128.7, 128.6, 128.5(2), 128.1, 128.0, 127.9(3), 127.8, 100.6, 96.1, 95.5, 76.3, 75.2, 75.0, 72.5, 72.3, 72.0, 71.6, 70.1, 69.5, 68.8, 68.5, 68.1, 62.9, 61.6, 37.2, 25.0, 21.0, 20.8(3), 20.7(2), 20.6; **HRMS** (ESI)  $m/z$  calcd for  $C_{69}H_{83}NNaO_{26}$   $[M + Na]^+$  1364.5096, found 1364.5105.**

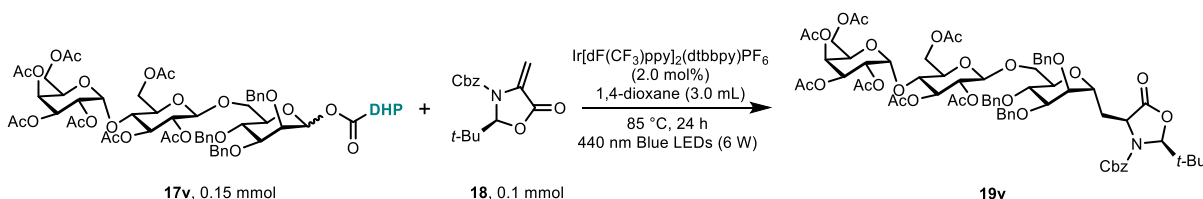

**(2*R*,3*S*,4*S*,5*R*,6*R*)-2-(Acetoxymethyl)-6-(((2*R*,3*R*,4*S*,5*R*,6*R*)-4,5-diacetoxy-2-(acetoxymethyl)-6-(((2*R*,3*R*,4*R*,5*R*,6*R*)-3,4,5-tris(benzyloxy)-6-(((2*S*,4*S*)-3-((benzyloxy)carbonyl)-2-(*tert*-butyl)-5-oxooxazolidin-4-yl)methyl)tetrahydro-2*H*-pyran-2-yl)methoxy)tetrahydro-2*H*-pyran-3-yl)oxy)tetrahydro-2*H*-pyran-3,4,5-triyl triacetate (**19v**). According to the general protocol B, 3,5-diethyl 4-((2*R*,3*S*,4*S*,5*R*,6*R*)-3,4,5-tris(benzyloxy)-6-(((2*R*,3*R*,4*S*,5*R*,6*R*)-3,4-diacetoxy-6-(acetoxymethyl)-5-(((2*R*,3*R*,4*S*,5*S*,6*R*)-3,4,5-triacetoxy-6-(acetoxymethyl)tetrahydro-2*H*-pyran-2-yl)oxy)tetrahydro-2*H*-pyran-2-yl)oxy)methyl)tetrahydro-2*H*-pyran-2-yl) 2,6-dimethyl-1,4-dihydropyridine-3,4,5-tricarboxylate **17v** (202 mg, 0.150 mmol, 1.50 equiv), benzyl (*S*)-2-(*tert*-butyl)-4-methylene-5-oxooxazolidine-3-carboxylate<sup>4</sup> **18** (29.0 mg, 0.100 mmol, 1.00 equiv), Ir[dF(CF<sub>3</sub>)ppy]<sub>2</sub>(dtbbpy)PF<sub>6</sub> (2.3 mg, 0.002 mmol, 0.020 equiv) were added to anhydrous 1,4-dioxane (3.00 mL). The reaction mixture was stirred at 85 °C under 6W Blue LEDs irradiation for 24 h and afforded after chromatographic purification on SiO<sub>2</sub> (Petroleum ether:**

EtOAc = 1.5:1) **19v** (90.5 mg, 67%, d.r. > 20:1) as a foam:  $[\alpha]_D^{25} = -5.1$  ( $c = 0.965$ ,  $\text{CHCl}_3$ );  $^1\text{H NMR}$  (400 MHz,  $\text{CDCl}_3$ )  $\delta$  7.38 – 7.21 (m, 20H), 5.64 (s, 1H), 5.34 – 5.32 (m, 2H), 5.20 – 5.03 (m, 3H), 4.95 – 4.85 (m, 2H), 4.70 – 4.46 (m, 11H), 4.15 – 4.05 (m, 4H), 3.91 – 3.62 (m, 7H), 3.52 (d,  $J = 4.6$  Hz, 1H), 2.16 – 1.92 (m, 23H), 0.95 (s, 9H);  $^{13}\text{C NMR}$  (101 MHz,  $\text{CDCl}_3$ )  $\delta$  172.8, 170.5(2), 170.3, 170.2(2), 169.8, 169.1, 156.0, 138.4, 138.1(2), 135.7, 128.8, 128.7, 128.5(3), 128.0(2), 127.9(2), 127.8(2), 100.7, 96.2, 76.2, 75.2, 72.5, 72.3, 72.0, 71.7, 71.6, 71.2, 70.7, 69.1, 68.7, 67.9, 66.8, 62.1, 60.9, 37.2, 31.5, 29.8, 24.9, 20.9, 20.8(2), 20.6(2); **HRMS** (ESI)  $m/z$  calcd for  $\text{C}_{69}\text{H}_{83}\text{NNaO}_{26}$   $[\text{M} + \text{Na}]^+$  1364.5096, found 1364.5109.

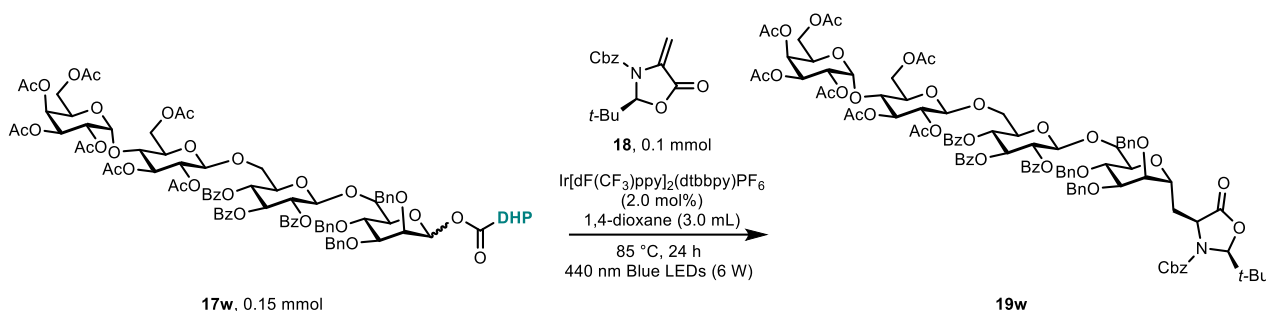

**(2R,3R,5R,6R)-2-((((2R,3R,4S,5R,6R)-3,4-Diacetoxy-6-(acetoxymethyl)-5-(((2R,3R,4S,5S,6R)-3,4,5-triacetoxy-6-(acetoxymethyl)tetrahydro-2H-pyran-2-yl)oxy)tetrahydro-2H-pyran-2-yl)oxy)methyl)-6-(((2R,3R,4R,5R,6R)-3,4,5-tris(benzyloxy)-6-(((2S,4S)-3-((benzyloxy)carbonyl)-2-(tert-butyl)-5-oxooxazolidin-4-yl)methyl)tetrahydro-2H-pyran-2-yl)methoxy)tetrahydro-2H-pyran-3,4,5-triyl tribenzoate (**19w**)). According to the general protocol B, 3,5-diethyl 4-(((2R,3S,4S,5R,6R)-3,4,5-tris(benzyloxy)-6-(((2R,3R,4S,5R,6R)-3,4-diacetoxy-6-(acetoxymethyl)-5-(((2R,3R,4S,5R,6R)-3,4,5-triacetoxy-6-(acetoxymethyl)tetrahydro-2H-pyran-2-yl)oxy)tetrahydro-2H-pyran-2-yl)oxy)methyl)tetrahydro-2H-pyran-2-yl) 2,6-dimethyl-1,4-dihydropyridine-3,4,5-tricarboxylate **17w** (202 mg, 0.150 mmol, 1.50 equiv), benzyl (*S*)-2-(*tert*-butyl)-4-methylene-5-oxooxazolidine-3-carboxylate<sup>4</sup> **18** (29.0 mg, 0.100 mmol, 1.00 equiv),  $\text{Ir}[\text{dF}(\text{CF}_3)\text{ppy}]_2(\text{dtbbpy})\text{PF}_6$  (2.3 mg, 0.002 mmol, 0.020 equiv) were added to anhydrous 1,4-dioxane (3.00 mL). The reaction mixture was stirred at 85 °C under 6W Blue LEDs irradiation for 24 h and afforded after chromatographic purification on  $\text{SiO}_2$  (Petroleum ether: EtOAc = 1:1) **19w** (118 mg, 65%, d.r. > 20:1) as a foam:  $[\alpha]_D^{25} = -7.3$  ( $c = 0.78$ ,  $\text{CHCl}_3$ );  $^1\text{H NMR}$  (400 MHz,  $\text{CDCl}_3$ )  $\delta$  7.92 – 7.86 (m, 3H), 7.77 – 7.75 (m, 2H), 7.55 – 7.50 (m, 1H), 7.46 – 7.17 (m, 29H), 5.83 (t,  $J = 9.6$ , 9.6 Hz, 1H), 5.50 – 5.39 (m, 2H), 5.33 (d,  $J = 3.4$  Hz, 1H), 5.25 – 5.20 (m, 2H), 5.12 – 5.05 (m, 2H), 5.00 – 4.83 (m, 4H), 4.58 – 4.19 (m, 12H), 4.12 – 3.94 (m, 6H), 3.89 – 3.84 (m, 2H), 3.75 – 3.65 (m, 3H), 3.60 (t,  $J = 9.4$ , 9.4 Hz, 1H), 3.54 – 3.43 (m, 2H), 2.14 (s, 3H), 2.06 – 1.84 (m, 20H), 0.89 (s, 9H);  $^{13}\text{C NMR}$  (101 MHz,  $\text{CDCl}_3$ )  $\delta$  172.2, 170.5 (2), 170.3, 170.2, 169.8, 169.2, 165.8, 165.2, 165.0, 155.2, 138.6, 138.3, 138.2, 133.6, 133.2, 129.9, 129.8, 129.1, 129.0, 128.7, 128.6, 128.5 (2), 128.4, 128.3, 128.1, 127.9, 127.8, 127.7 (3), 101.2, 101.0, 100.8, 95.8, 76.4, 76.3, 73.5, 73.2, 72.8, 72.6, 72.1, 72.0, 71.7, 71.2, 71.1, 70.7, 69.7, 69.1, 68.7, 68.3, 66.7, 62.3, 60.9, 37.1, 25.0, 20.9 (2), 20.8 (3), 20.7 (2); **HRMS** (ESI)  $m/z$  calcd for  $\text{C}_{96}\text{H}_{105}\text{NNaO}_{34}$   $[\text{M} + \text{Na}]^+$  1838.6410, found 1838.6412.**

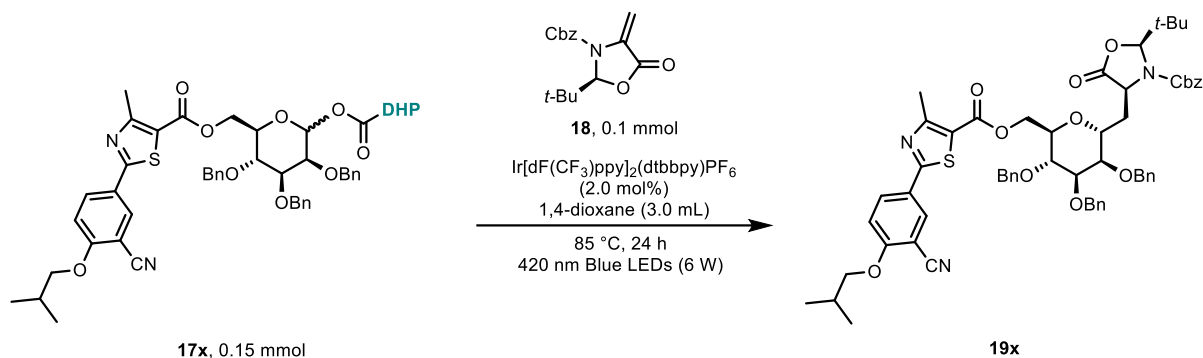

**Benzyl (2*S*,4*S*)-2-(*tert*-butyl)-5-oxo-4-(((2*S*,3*R*,4*R*,5*R*,6*R*)-3,4,5-tris(benzyloxy)-6-(((5-(3-cyano-4-isobutoxyphenyl)-4-methylthiazole-2-carbonyl)oxy)methyl)tetrahydro-2*H*-pyran-2-yl)methyl)oxazolidine-3-carboxylate (**19x**).**

According to the general protocol B, 3,5-diethyl 4-((2*S*,3*S*,4*S*,5*R*,6*R*)-3,4,5-tris(benzyloxy)-6-(((2-(3-cyano-4-isobutoxyphenyl)-4-methylthiazole-5-carbonyl)oxy)methyl)tetrahydro-2*H*-pyran-2-yl) 2,6-dimethyl-1,4-dihydropyridine-3,4,5-tricarboxylate **17x** (154 mg, 0.150 mmol, 1.50 equiv), benzyl (*S*)-2-(*tert*-butyl)-4-methylene-5-oxooxazolidine-3-carboxylate<sup>4</sup> **18** (29.0 mg, 0.100 mmol, 1.00 equiv),  $\text{Ir}[\text{dF}(\text{CF}_3)\text{ppy}]_2(\text{dtbbpy})\text{PF}_6$  (2.3 mg, 0.002 mmol, 0.020 equiv) were added to anhydrous 1,4-dioxane (3.00 mL). The reaction mixture was stirred at 85 °C under 6W Blue LEDs irradiation for 24 h and afforded after chromatographic purification on  $\text{SiO}_2$  (Petroleum ether: EtOAc = 4:1) **19x** (52.0 mg, 51%, d.r. > 20:1) as a foam:  $[\alpha]_D^{25} = +11.4$  (c = 1.40,  $\text{CHCl}_3$ ); **<sup>1</sup>H NMR** (400 MHz,  $\text{CDCl}_3$ )  $\delta$  8.09 (d,  $J = 2.2$  Hz, 1H), 7.98 (dd,  $J = 8.9, 2.3$  Hz, 1H), 7.38 – 7.24 (m, 23H), 6.97 (d,  $J = 8.9$  Hz, 1H), 5.55 (s, 1H), 5.14 (s, 2H), 4.83 (d,  $J = 11.2$  Hz, 1H), 4.70 – 4.57 (m, 7H), 4.50 – 4.45 (m, 1H), 3.98 – 3.87 (m, 4H), 3.78 (dd,  $J = 7.7, 2.9$  Hz, 1H), 3.61 (t,  $J = 3.4, 3.4$  Hz, 1H), 2.71 (s, 4H), 2.26 – 2.16 (m, 2H), 1.93 – 1.86 (m, 1H), 1.10 (d,  $J = 6.7$  Hz, 6H), 0.95 (s, 9H). **<sup>13</sup>C NMR** (101 MHz,  $\text{CDCl}_3$ )  $\delta$  172.2, 167.3, 162.6, 161.8, 161.4, 155.6, 138.2, 138.1 (2), 135.1, 132.7, 132.1, 128.8 (2), 128.6, 128.5 (2), 128.4, 128.2, 128.0 (2), 127.9 (2), 127.7, 126.0, 121.8, 115.5, 112.6, 103.0, 96.1, 76.2, 75.7, 74.5, 74.4, 72.4, 71.9, 71.5, 68.5, 63.9, 53.3, 37.2, 33.0, 28.2, 24.9, 19.2, 17.6. **HRMS** (ESI)  $m/z$  calcd for  $\text{C}_{59}\text{H}_{63}\text{N}_3\text{NaO}_{11}\text{S}$   $[\text{M} + \text{Na}]^+$  1044.4076, found 1044.4087.

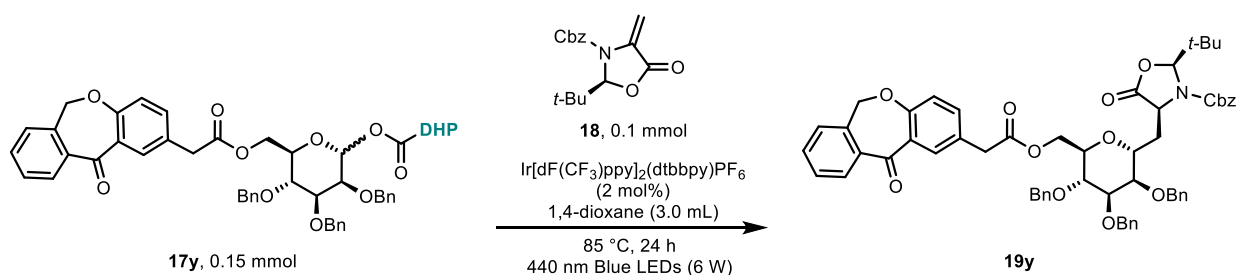

**Benzyl (2*S*,4*S*)-2-(*tert*-butyl)-5-oxo-4-(((2*S*,3*R*,4*R*,5*R*,6*R*)-3,4,5-tris(benzyloxy)-6-(((2-(11-oxo-6,11-dihydrodibenzo[b,e]oxepin-2-yl)acetoxy)methyl)tetrahydro-2*H*-pyran-2-yl)methyl)oxazolidine-3-**

**carboxylate (**19y**).** According to the general protocol B, 3,5-diethyl 4-((3*S*,4*S*,5*R*,6*R*)-3,4,5-tris(benzyloxy)-6-(((2-(11-oxo-6,11-dihydrodibenzo[b,e]oxepin-2-yl)acetoxy)methyl)tetrahydro-2*H*-pyran-2-yl) 2,6-dimethyl-1,4-dihydropyridine-3,4,5-tricarboxylate **17y** (147 mg, 0.150 mmol, 1.50 equiv), benzyl (*S*)-2-(*tert*-butyl)-4-methylene-5-oxooxazolidine-3-carboxylate<sup>4</sup> **18** (29.0 mg, 0.100 mmol, 1.00 equiv),  $\text{Ir}[\text{dF}(\text{CF}_3)\text{ppy}]_2(\text{dtbbpy})\text{PF}_6$  (2.3 mg, 0.002 mmol, 0.020 equiv) were added to anhydrous 1,4-dioxane (3.00 mL). The reaction mixture was stirred at 85 °C under 6W Blue LEDs irradiation for 24 h and afforded after chromatographic purification on  $\text{SiO}_2$  (Petroleum ether: EtOAc = 4:1) **19y** (55.0 mg, 56%, d.r. > 20:1) as a



foam:  $[\alpha]_D^{25} = +15.6$  ( $c = 1.17$ ,  $\text{CHCl}_3$ );  $^1\text{H NMR}$  (400 MHz,  $\text{CDCl}_3$ )  $\delta$  8.12 (d,  $J = 2.4$  Hz, 1H), 7.88 (dd,  $J = 7.7$ , 1.4 Hz, 1H), 7.59 – 7.55 (m, 1H), 7.49 – 7.45 (m, 1H), 7.41 – 7.26 (m, 22H), 6.98 (d,  $J = 8.4$  Hz, 1H), 5.51 (s, 1H), 5.15 – 5.12 (m, 4H), 4.46 – 4.72 (m, 8H), 4.40 – 4.29 (m, 2H), 3.93 – 3.88 (m, 2H), 3.80 – 3.73 (m, 2H), 3.67 – 3.56 (m, 3H), 2.18 – 2.11 (m, 1H), 1.93 – 1.86 (m, 1H), 0.93 (s, 9H);  $^{13}\text{C NMR}$  (101 MHz,  $\text{CDCl}_3$ )  $\delta$  190.8, 172.2, 171.2, 160.5, 155.6, 140.5, 138.2(2), 136.6, 135.8, 135.4, 132.8, 132.7, 129.8, 129.3, 128.8, 128.7, 128.5(3), 128.1, 128.0, 127.9(2), 127.8(2), 125.2, 121.1, 96.1, 76.0, 75.0, 74.1, 73.7, 72.3, 72.1, 71.4, 68.3(2), 53.2, 40.4, 37.1, 25.0; **HRMS** (ESI)  $m/z$  calcd for  $\text{C}_{59}\text{H}_{59}\text{NNaO}_{12}$   $[\text{M} + \text{Na}]^+$  996.3929, found 996.3937.

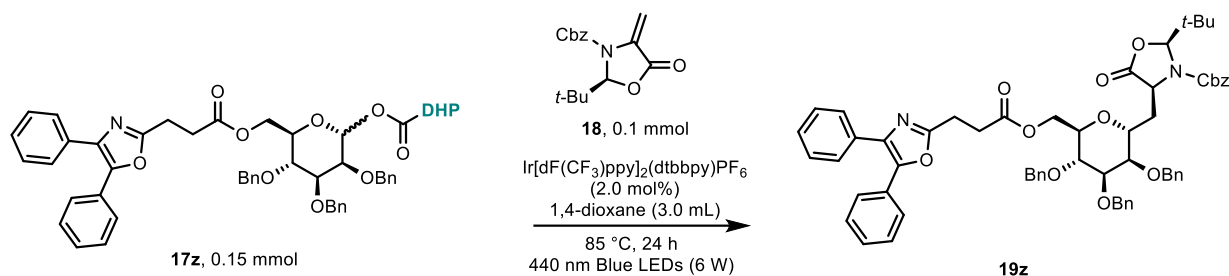

**Benzyl** (2*S*,4*S*)-2-(*tert*-butyl)-5-oxo-4-(((2*S*,3*R*,4*R*,5*R*,6*R*)-3,4,5-tris(benzyloxy)-6-(((3-(4,5-diphenyloxazol-2-yl)propanoyl)oxy)methyl)tetrahydro-2*H*-pyran-2-yl)methyl)oxazolidine-3-carboxylate (**19z**). According to the general protocol B, 3,5-diethyl 4-((2*S*,3*S*,4*S*,5*R*,6*R*)-3,4,5-tris(benzyloxy)-6-(((3-(4,5-diphenyloxazol-2-yl)propanoyl)oxy)methyl)tetrahydro-2*H*-pyran-2-yl) 2,6-dimethyl-1,4-dihydropyridine-3,4,5-tricarboxylate **17z** (154 mg, 0.150 mmol, 1.50 equiv), benzyl (*S*)-2-(*tert*-butyl)-4-methylene-5-oxooxazolidine-3-carboxylate<sup>4</sup> **18** (29.0 mg, 0.100 mmol, 1.00 equiv),  $\text{Ir}[\text{dF}(\text{CF}_3)\text{ppy}]_2(\text{dtbbpy})\text{PF}_6$  (2.3 mg, 0.002 mmol, 0.020 equiv) were added to anhydrous 1,4-dioxane (3.00 mL). The reaction mixture was stirred was stirred at 85 °C under 6W Blue LEDs irradiation for 24 h and afforded after chromatographic purification on  $\text{SiO}_2$  (Petroleum ether: EtOAc = 4:1) **19z** (50.0 mg, 50%, d.r. > 20:1) as a foam:  $[\alpha]_D^{25} = +14.0$  ( $c = 1.67$ ,  $\text{CHCl}_3$ );  $^1\text{H NMR}$  (400 MHz,  $\text{CDCl}_3$ )  $\delta$  7.63 – 7.60 (m, 2H), 7.57 – 7.54 (m, 2H), 7.37 7.24 (m, 26H), 5.5 (s, 1H), 5.18 – 5.11 (m, 2H), 4.7 (d,  $J = 11.2$  Hz, 1H), 4.66 – 4.54 (m, 6H), 4.41 – 4.27 (m, 2H), 3.88 – 3.81 (m, 3H), 3.59 – 3.57 (m, 1H), 3.1 (dd,  $J = 8.7$ , 6.7 Hz, 2H), 2.9 (dd,  $J = 9.0$ , 6.6 Hz, 2H), 2.19 – 2.12 (m, 1H), 1.93 – 1.86 (m, 1H), 0.9 (s, 9H);  $^{13}\text{C NMR}$  (101 MHz,  $\text{CDCl}_3$ )  $\delta$  172.3, 171.9, 161.9, 155.7, 145.5, 138.2(2), 135.2, 132.6, 129.1, 128.9, 128.8, 128.7, 128.6, 128.5(2), 128.2, 128.1, 128.0(2), 127.9(2), 127.8, 126.6, 96.2, 76.0, 74.8, 72.3, 71.4, 68.4, 63.6, 53.4, 37.2, 31.2, 25.0, 23.6; **HRMS** (ESI)  $m/z$  calcd for  $\text{C}_{61}\text{H}_{62}\text{N}_2\text{NaO}_{11}$   $[\text{M} + \text{Na}]^+$  1021.4246, found 1021.4255.

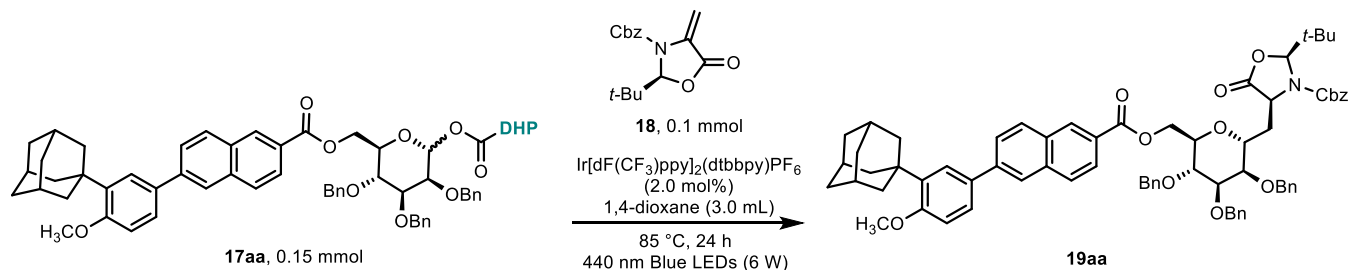

**Benzyl** (2*S*,4*S*)-4-(((2*S*,3*R*,4*R*,5*R*,6*R*)-6-(((6-(3-((3*r*,5*r*,7*r*)-adamantan-1-yl)-4-methoxyphenyl)-2-naphthoyl)oxy)methyl)-3,4,5-tris(benzyloxy)tetrahydro-2*H*-pyran-2-yl)methyl)-2-(*tert*-butyl)-5-oxooxazolidine-3-carboxylate (**19aa**). According to the general protocol B, 4-((2*S*,3*S*,4*S*,5*R*,6*R*)-6-(((6-(3-((3*r*,5*r*,7*r*)-adamantan-1-yl)-4-methoxyphenyl)-2-naphthoyl)oxy)methyl)-3,4,5-tris(benzyloxy)tetrahydro-

2*H*-pyran-2-yl) 3,5-diethyl 2,6-dimethyl-1,4-dihydropyridine-3,4,5-tricarboxylate **17a** (149 mg, 0.150 mmol, 1.50 equiv), benzyl (*S*)-2-(*tert*-butyl)-4-methylene-5-oxooxazolidine-3-carboxylate<sup>4</sup> **18** (29.0 mg, 0.100 mmol, 1.00 equiv), Ir[dF(CF<sub>3</sub>)ppy]<sub>2</sub>(dtbbpy)PF<sub>6</sub> (2.3 mg, 0.002 mmol, 0.020 equiv) were added to anhydrous 1,4-dioxane (3.00 mL). The reaction mixture was stirred at 85 °C under 6W Blue LEDs irradiation for 24 h and afforded after chromatographic purification on SiO<sub>2</sub> (Petroleum ether: EtOAc = 4:1) **19aa** (52.0 mg, 46%, d.r. = 16:1, major  $\alpha$ ) as a foam <sup>1</sup>H NMR (400 MHz, CDCl<sub>3</sub>)  $\delta$  8.58 – 8.55 (m, 1H), 8.38 (d, *J* = 8.9 Hz, 0.10H), 8.13 (d, *J* = 9.2 Hz, 0.10H), 8.06 – 8.00 (m, 1.90H), 7.91 – 7.83 (m, 1.90H), 7.78 – 7.73 (m, 1H), 7.62 (d, *J* = 2.4 Hz, 1H), 7.56 (dd, *J* = 8.4, 2.3 Hz, 1H), 7.48 (d, *J* = 8.4 Hz, 0.20H), 7.43 – 7.27 (m, 19.80H), 7.03 – 6.98 (m, 1H), 5.54 (s, 0.95H), 5.47 (s, 0.05H), 5.13 (s, 1.90H), 5.01 (s, 0.10H), 4.83 (d, *J* = 11.2 Hz, 1H), 4.78 – 4.51 (m, 9H), 4.10 – 4.01 (m, 2H), 3.92 (s, 3H), 3.82 (dd, *J* = 7.6, 3.0 Hz, 1H), 3.65 (t, *J* = 3.5, 3.5 Hz, 1H), 2.27 – 2.17 (m, 7H), 2.13 – 2.09 (m, 3H), 1.96 – 1.89 (m, 1H), 1.86 – 1.79 (m, 6H), 0.95 (s, 9H). <sup>13</sup>C NMR (101 MHz, CDCl<sub>3</sub>)  $\delta$  172.3, 166.7, 159.0, 155.6, 141.4, 139.1, 138.3, 138.2, 136.0, 135.2, 132.7, 131.3, 131.1, 129.9, 128.9, 128.8(2), 128.6(2), 128.5(2), 128.3, 128.2, 128.1, 128.0, 127.9, 127.7, 127.0, 126.5, 126.1, 125.9, 125.8, 124.8, 112.2, 96.1, 76.3, 74.7, 74.4, 72.4, 72.2, 71.5, 68.5, 63.8, 55.3, 53.4, 40.7, 37.3, 37.2(2), 31.6, 29.2, 25.0; HRMS (ESI) *m/z* calcd for C<sub>71</sub>H<sub>75</sub>NNaO<sub>11</sub> [M + Na]<sup>+</sup> 1140.5232, found 1140.5241.

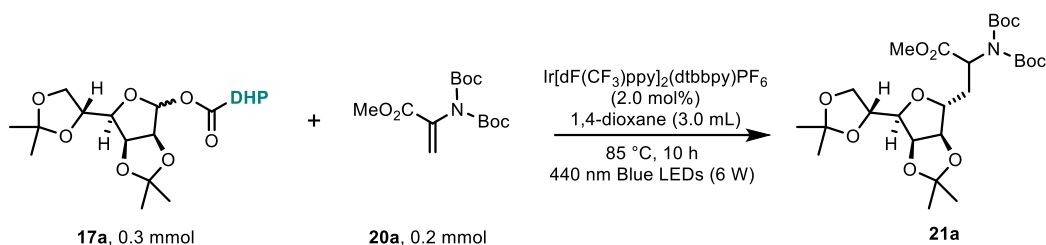

**Methyl 2-(bis(*tert*-butoxycarbonyl)amino)-3-((3*aR*,4*R*,6*R*,6*aS*)-6-((*R*)-2,2-dimethyl-1,3-dioxolan-4-yl)-2,2-dimethyltetrahydrofuro[3,4-*d*][1,3]dioxol-4-yl)propanoate (21a).** According to the general protocol B, 4-((3*aS*,6*R*,6*aS*)-6-((*S*)-2,2-dimethyl-1,3-dioxolan-4-yl)-2,2-dimethyltetrahydrofuro[3,4-*d*][1,3]dioxol-4-yl) 3,5-diethyl 2,6-dimethyl-1,4-dihydropyridine-3,4,5-tricarboxylate<sup>1</sup> **17a** (162 mg, 0.300 mmol, 1.50 equiv), *N,N*-*tert*-butoxycarbonyldehydroalanine<sup>2</sup> **20a** (60.2 mg, 0.200 mmol, 1.00 equiv), Ir[dF(CF<sub>3</sub>)ppy]<sub>2</sub>(dtbbpy)PF<sub>6</sub> (4.5 mg, 0.004 mmol, 0.020 equiv) were added to anhydrous 1,4-dioxane (3.00 mL). The reaction mixture was stirred in 6W Blue LEDs irradiation under N<sub>2</sub> at 85 °C for 10 h and afforded after chromatographic purification on SiO<sub>2</sub> (Petroleum ether: EtOAc = 3:1) **21a** (73.0 mg, 67%, d.r. = 1.5:1) as a foam: <sup>1</sup>H NMR (400 MHz, CDCl<sub>3</sub>)  $\delta$  5.12 (t, *J* = 6.6, 6.6 Hz, 0.77H), 4.96 (dd, *J* = 10.0, 4.0 Hz, 0.23H), 4.80 – 4.74 (m, 1H), 4.53 (dd, *J* = 6.2, 2.8 Hz, 1H), 4.38 – 4.29 (m, 1.77H), 4.12 – 4.00 (m, 2.23H), 3.76 – 3.70 (m, 3.23H), 3.65 (dd, *J* = 8.4, 3.7 Hz, 0.77H), 2.31 – 2.25 (m, 0.77H), 2.02 – 1.95 (m, 0.46H), 1.90 – 1.82 (m, 0.77H), 1.49 – 1.47 (m, 18H), 1.43 – 1.33 (m, 12H); <sup>13</sup>C NMR (101 MHz, CDCl<sub>3</sub>)  $\delta$  171.4, 171.0, 152.2, 151.9, 112.8, 112.7, 109.4, 109.3, 85.7, 85.4, 83.5, 83.3, 82.5, 81.0, 80.9, 80.8, 80.5, 80.2, 73.4, 73.3, 67.3(2), 55.6, 55.4, 52.5, 52.4, 31.6, 30.9, 28.1(2), 27.1, 27.0, 26.3, 25.4, 25.3, 24.9(2); HRMS (ESI) *m/z* calcd for C<sub>26</sub>H<sub>43</sub>NNaO<sub>11</sub> [M + Na]<sup>+</sup> 568.2728, found 568.2727.

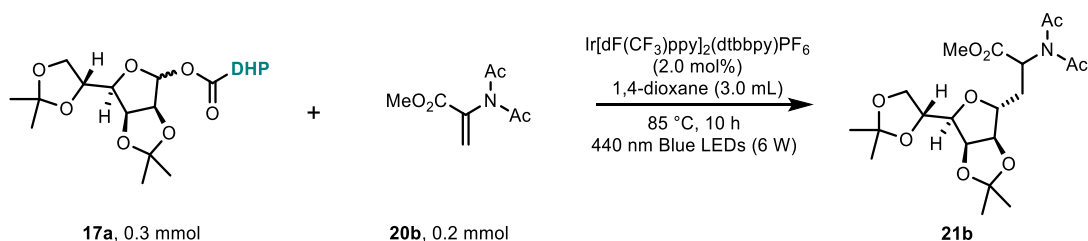

**Methyl 2-(*N*-acetylacetamido)-3-((3*aR*,4*R*,6*R*,6*aS*)-6-((*R*)-2,2-dimethyl-1,3-dioxolan-4-yl)-2,2-dimethyltetrahydrofuro[3,4-*d*][1,3]dioxol-4-yl)propanoate (21b).** According to the general protocol B, 4-((3*aS*,6*R*,6*aS*)-6-((*S*)-2,2-dimethyl-1,3-dioxolan-4-yl)-2,2-dimethyltetrahydrofuro[3,4-*d*][1,3]dioxol-4-yl) 3,5-diethyl 2,6-dimethyl-1,4-dihydropyridine-3,4,5-tricarboxylate<sup>1</sup> **17a** (162 mg, 0.300 mmol, 1.50 equiv), methyl 2-(*N*-acetylacetamido)acrylate<sup>6</sup> **20b** (39.8 mg, 0.200 mmol, 1.00 equiv), Ir[dF(CF<sub>3</sub>)ppy]<sub>2</sub>(dtbbpy)PF<sub>6</sub> (4.5 mg, 0.004 mmol, 0.020 equiv) were added to anhydrous 1,4-dioxane (3.00 mL). The reaction mixture was stirred at 85 °C under 6W Blue LEDs irradiation for 10 h and afforded after chromatographic purification on SiO<sub>2</sub> (Petroleum ether: EtOAc = 3:1) **21b** (75.0 mg, 87%, d.r. = 1.1:1) as a foam: <sup>1</sup>H NMR (400 MHz, CDCl<sub>3</sub>) δ 4.77 (dd, *J* = 6.1, 3.9 Hz, 0.53H), 4.70 (dd, *J* = 6.1, 3.8 Hz, 0.47H), 4.56 (dd, *J* = 7.1, 4.5 Hz, 0.47H), 4.51 – 4.48 (m, 1H), 4.46 – 4.42 (m, 0.53H), 4.40 – 4.32 (m, 1.47H), 4.07 – 3.88 (m, 3H), 3.76 (dd, *J* = 6.0, 3.8 Hz, 0.47H), 3.70 – 3.69 (m, 3H), 2.59 – 2.53 (m, 0.53H), 2.42 – 2.41 (m, 6H), 2.21 – 2.16 (m, 1H), 1.70 – 1.62 (m, 0.47H), 1.45 (s, 3H), 1.40 (- 1.38 (s, 3H), 1.34 -1.33 (s, 3H), 1.29 (s, 3H); <sup>13</sup>C NMR (101 MHz, CDCl<sub>3</sub>) δ 173.5, 173.1, 170.4, 170.0, 112.9, 112.8, 109.0, 108.8, 85.2, 85.1, 82.7, 80.6, 80.5, 80.3, 79.9, 79.8, 73.6, 73.5, 66.5, 66.2, 56.6, 56.2, 52.8(2), 31.9, 29.1, 26.9(2), 26.6, 26.4, 26.0(2), 25.2, 25.1, 24.5, 24.4; HRMS (ESI) *m/z* calcd for C<sub>20</sub>H<sub>31</sub>NNaO<sub>9</sub> [M + Na]<sup>+</sup> 452.1891, found 452.1888.

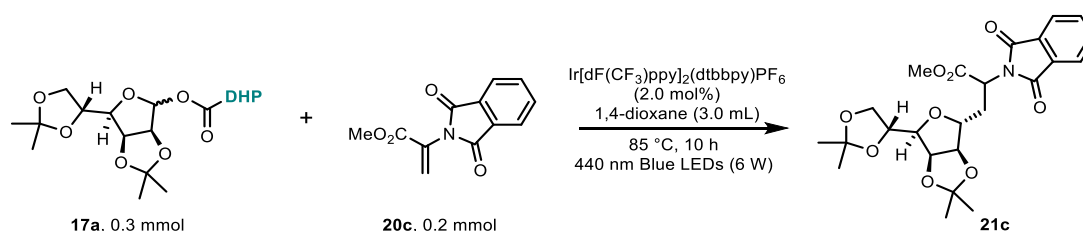

**Methyl 3-((3*aR*,4*R*,6*R*,6*aS*)-6-((*R*)-2,2-dimethyl-1,3-dioxolan-4-yl)-2,2-dimethyltetrahydrofuro[3,4-*d*][1,3]dioxol-4-yl)-2-(1,3-dioxoisindolin-2-yl)propanoate (21c).** According to the general protocol B, 4-((3*aS*,6*R*,6*aS*)-6-((*S*)-2,2-dimethyl-1,3-dioxolan-4-yl)-2,2-dimethyltetrahydrofuro[3,4-*d*][1,3]dioxol-4-yl) 3,5-diethyl 2,6-dimethyl-1,4-dihydropyridine-3,4,5-tricarboxylate<sup>1</sup> **17a** (162 mg, 0.300 mmol, 1.50 equiv), methyl 2-phthalimidoacrylate<sup>7</sup> **20c** (46.0 mg, 0.200 mmol, 1.00 equiv), Ir[dF(CF<sub>3</sub>)ppy]<sub>2</sub>(dtbbpy)PF<sub>6</sub> (4.5 mg, 0.004 mmol, 0.020 equiv) were added to anhydrous 1,4-dioxane (3.00 mL). The reaction mixture was stirred under 6W Blue LEDs irradiation at 85 °C for 10 h and afforded after chromatographic purification on SiO<sub>2</sub> (Petroleum ether: EtOAc = 4:1) **21c** (82.0 mg, 86%, d.r. = 1.1:1) as a foam: <sup>1</sup>H NMR (400 MHz, CDCl<sub>3</sub>) δ 7.88 – 7.84 (m, 2H), 7.76 – 7.72 (m, 2H), 5.04 – 5.00 (m, 1H), 4.81 (dd, *J* = 6.0, 3.8 Hz, 0.50H), 4.71 (dd, *J* = 6.0, 3.8 Hz, 0.50H), 4.53 (dd, *J* = 6.0, 1.4 Hz, 1H), 4.40 – 4.36 (m, 0.50H), 4.25 (dd, *J* = 10.4, 4.0 Hz, 0.50H), 4.21 – 4.08 (m, 1.50H), 3.91 (dd, *J* = 12.4, 3.6 Hz, 0.50H), 3.78 (dd, *J* = 8.1, 3.8 Hz, 0.50H), 3.74 – 3.73 (s, 3H), 3.67 (dd, *J* = 8.6, 6.2 Hz, 0.50H), 3.60 (dd, *J* = 8.2, 3.8 Hz, 0.50H), 3.46 (dd, *J* = 8.6, 5.2 Hz, 0.50H), 2.49 – 2.42 (m, 0.50H), 2.39 – 2.28 (m, 1.50H), 1.48 (s, 1H), 1.44 (s, 2H), 1.42 (s, 2H), 1.37 (s, 1H), 1.32 – 1.26 (m, 6H); <sup>13</sup>C NMR (101 MHz, CDCl<sub>3</sub>) δ 169.9, 169.5, 167.6(2), 134.4, 132.1, 132.0, 123.8, 113.0, 112.9, 109.5, 109.3, 85.9, 85.3, 83.0, 80.7(2), 80.6, 80.3, 80.2, 73.4, 73.1, 67.2, 67.0, 53.1, 49.9, 48.9, 29.8, 28.9, 27.2, 26.9, 26.3, 26.1, 25.5, 25.4, 24.8, 24.5; HRMS (ESI) *m/z* calcd for C<sub>24</sub>H<sub>29</sub>NNaO<sub>9</sub> [M + Na]<sup>+</sup> 498.1735, found 498.1732.

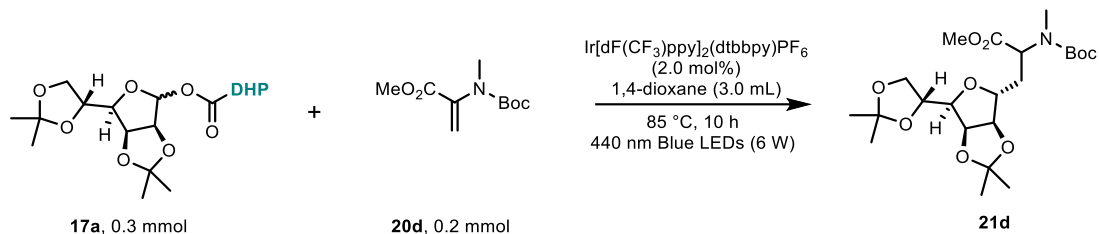

**Methyl 2-((*tert*-butoxycarbonyl)(methyl)amino)-3-((3*aR*,4*R*,6*R*,6*aS*)-6-((*R*)-2,2-dimethyl-1,3-dioxolan-4-yl)-2,2-dimethyltetrahydrofuro[3,4-*d*][1,3]dioxol-4-yl)propanoate (21d).** According to the general protocol B, 4-((3*aS*,6*R*,6*aS*)-6-((*S*)-2,2-dimethyl-1,3-dioxolan-4-yl)-2,2-dimethyltetrahydrofuro[3,4-*d*][1,3]dioxol-4-yl) 3,5-diethyl 2,6-dimethyl-1,4-dihydropyridine-3,4,5-tricarboxylate<sup>1</sup> **17a** (162 mg, 0.300 mmol, 1.50 equiv), methyl 2-((*tert*-butoxycarbonyl)(methyl)amino)acrylate<sup>8</sup> **20d** (43.0 mg, 0.200 mmol, 1.00 equiv), Ir[dF(CF<sub>3</sub>)ppy]<sub>2</sub>(dtbbpy)PF<sub>6</sub> (4.5 mg, 0.004 mmol, 0.020 equiv) were added to anhydrous 1,4-dioxane (3.00 mL). The reaction mixture was stirred at 85 °C under 6W Blue LEDs irradiation for 10 h and afforded after chromatographic purification on SiO<sub>2</sub> (Petroleum ether: EtOAc = 4:1) **21d** (44.6 mg, 49%, d.r. = 1.1:1) as a foam: <sup>1</sup>H NMR (400 MHz, CDCl<sub>3</sub>) δ 4.80 – 4.76 (m, 1H), 4.55 (dd, *J* = 6.2, 2.2 Hz, 1H), 4.40 – 4.35 (m, 1.50H), 4.18 – 4.14 (m, 1H), 4.10 – 3.97 (m, 2.5H), 3.77 – 3.71 (m, 4H), 2.90 – 2.83 (m, 3H), 2.15 – 1.95 (m, 1H), 1.90 – 1.73 (m, 1H), 1.49 – 1.41 (m, 15H), 1.36 (s, 3H), 1.32 (s, 3H); <sup>13</sup>C NMR (101 MHz, CDCl<sub>3</sub>) δ 141.0, 140.9, 140.1, 138.9, 138.4, 138.2, 128.9, 128.7, 128.6(2), 128.3, 128.1(2), 127.8, 127.4, 127.1, 126.8, 126.4, 98.2, 82.5, 80.0, 77.8, 77.5, 77.2, 76.8, 76.0, 75.3, 73.6(2), 70.7, 55.0, 29.8; HRMS (ESI) *m/z* calcd for C<sub>22</sub>H<sub>37</sub>NNaO<sub>9</sub> [M + Na]<sup>+</sup> 482.2361, found 482.2358.

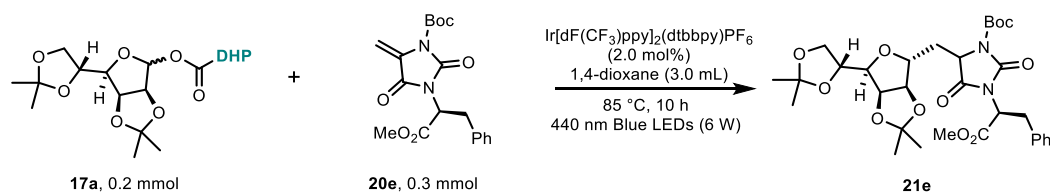

***tert*-Butyl 5-(((3*aR*,4*R*,6*R*,6*aS*)-6-((*R*)-2,2-dimethyl-1,3-dioxolan-4-yl)-2,2-dimethyltetrahydrofuro[3,4-*d*][1,3]dioxol-4-yl)methyl)-3-((*S*)-1-methoxy-1-oxo-3-phenylpropan-2-yl)-2,4-dioxoimidazolidine-1-carboxylate (21e).** According to the general procedure C, 3,5-diethyl 4-((3*aS*,5*aR*,9*aR*,9*bS*)-2,2,8,8-tetramethylhexahydro-[1,3]dioxolo[4',5':4,5]pyrano[3,2-*d*][1,3]dioxin-4-yl) 2,6-dimethyl-1,4-dihydropyridine-3,4,5-tricarboxylate<sup>1</sup> **17a** (108 mg, 0.200 mmol, 1.00 equiv), *tert*-butyl (*S*)-3-(1-methoxy-1-oxo-3-phenylpropan-2-yl)-5-methylene-2,4-dioxoimidazolidine-1-carboxylate **20e** (112 mg, 0.300 mmol, 1.50 equiv) and Ir[dF(CF<sub>3</sub>)ppy]<sub>2</sub>(dtbbpy)PF<sub>6</sub> (4.5 mg, 0.004 mmol, 0.020 equiv) were added to anhydrous 1,4-dioxane (3.00 mL). The reaction mixture was stirred at 85 °C under 6W blue LED irradiation for 10 h and afforded after chromatographic purification on SiO<sub>2</sub> (Petroleum ether: EtOAc = 3:1) to afford **21e** (55.0 mg, 44%, d.r. = 1.1:1) as a light yellow oil: <sup>1</sup>H NMR (400 MHz, CDCl<sub>3</sub>) δ 7.33 – 7.13 (m, 5H), 5.07 – 4.96 (m, 1H), 4.72 (dd, *J* = 6.0, 3.7 Hz, 1H), 4.47 – 4.13 (m, 4H), 4.03 – 3.87 (m, 2H), 3.77 (d, *J* = 6.1 Hz, 3H), 3.68 (dd, *J* = 8.3, 3.7 Hz, 0.52H), 3.60 (dd, *J* = 8.1, 3.8 Hz, 0.54H), 3.57 – 3.41 (m, 2H), 2.19 – 1.92 (m, 1H), 1.87 – 1.72 (m, 0.57H), 1.63 – 1.30 (m, 21H), 1.20 – 1.13 (m, 0.61H); <sup>13</sup>C NMR (101 MHz, CDCl<sub>3</sub>) δ 170.0, 169.9, 168.6, 168.5, 151.1, 151.0, 148.7, 148.4, 136.5, 136.4, 129.2, 128.9, 128.8, 127.1 (2), 112.9 (2), 109.3, 109.2, 85.5, 85.3, 85.0, 84.9, 80.7 (2), 80.6 (2), 80.5, 79.6, 77.2, 73.2, 73.1, 67.3, 66.8, 57.2, 56.4, 54.0, 53.5, 53.1 (2), 33.9, 33.8, 31.1, 30.3, 28.2, 28.1, 27.0, 26.9, 26.2, 25.4, 25.2, 24.9, 24.7; HRMS (ESI) *m/z* calcd for C<sub>31</sub>H<sub>42</sub>O<sub>11</sub>N<sub>2</sub>Na [M + Na]<sup>+</sup> 641.2681, found 641.2684.

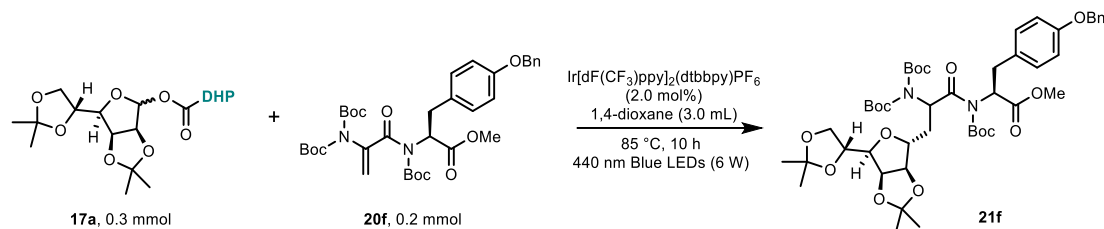

**Methyl (2*S*)-3-(4-(benzyloxy)phenyl)-2-(2-(bis(*tert*-butoxycarbonyl)amino)-*N*-(*tert*-butoxycarbonyl)-3-((3*aR*,4*R*,6*R*,6*aS*)-6-((*R*)-2,2-dimethyl-1,3-dioxolan-4-yl)-2,2-dimethyltetrahydrofuro[3,4-*d*][1,3]dioxol-4-yl)propanamido)propanoate (21f).** According to the general protocol B, 4-((3*aS*,6*R*,6*aS*)-6-((*S*)-2,2-dimethyl-1,3-dioxolan-4-yl)-2,2-dimethyltetrahydrofuro[3,4-*d*][1,3]dioxol-4-yl) 3,5-diethyl 2,6-dimethyl-1,4-dihydropyridine-3,4,5-tricarboxylate<sup>1</sup> **17a** (162 mg, 0.300 mmol, 1.50 equiv), *N,N*-*tert*-butoxycarbonyldehydroalanine **20f** (131 mg, 0.200 mmol, 1.00 equiv), Ir[dF(CF<sub>3</sub>)ppy]<sub>2</sub>(dtbbpy)PF<sub>6</sub> (4.5 mg, 0.004 mmol, 0.020 equiv) were added to anhydrous 1,4-dioxane (3.00 mL). The reaction mixture was stirred at 85 °C under 6W Blue LEDs irradiation for 10 h and afforded after chromatographic purification on SiO<sub>2</sub> (Toluene: EtOAc = 5:1) **21f** (146 mg, 81%, d.r. = 1.8:1) as an oil: <sup>1</sup>H NMR (400 MHz, CDCl<sub>3</sub>) δ 7.44 – 7.41 (m, 2H), 7.39 – 7.35 (m, 2H), 7.34 – 7.29 (m, 1H), 7.28 – 7.27 (m, 0.53H), 7.18 – 7.16 (m, 0.47H), 7.12 – 7.06 (m, 1H), 6.91 – 6.88 (m, 2H), 5.89 (dd, *J* = 11.0, 4.5 Hz, 0.47H), 5.63 (t, *J* = 6.7, 6.7 Hz, 0.53H), 5.40 – 5.35 (m, 1H), 5.03 – 5.01 (m, 2H), 4.77 (dd, *J* = 6.0, 3.7 Hz, 0.53H), 4.70 (dd, *J* = 6.0, 3.8 Hz, 0.47H), 4.59 (d, *J* = 6.0 Hz, 0.53H), 4.40 – 4.30 (m, 2H), 4.17 – 4.04 (m, 2.47H), 3.82 (dd, *J* = 8.4, 3.8 Hz, 0.53H), 3.76 (dd, *J* = 8.7, 3.8 Hz, 0.47H), 3.70 – 3.66 (m, 3H), 3.44 – 3.36 (m, 1H), 3.08 (dd, *J* = 14.1, 9.5 Hz, 0.47H), 2.84 (dd, *J* = 14.0, 3.6 Hz, 0.53H), 2.32 – 2.25 (m, 0.53H), 2.03 – 1.97 (m, 0.47H), 1.49 – 1.47 (m, 20H), 1.45 – 1.42 (m, 11H), 1.38 (d, *J* = 2.6 Hz, 3H), 1.33 (d, *J* = 1.4 Hz, 3H), 1.29 – 1.27 (m, 4H); <sup>13</sup>C NMR (101 MHz, CDCl<sub>3</sub>) δ 174.4, 172.6, 171.1, 170.8, 157.9, 157.6, 153.2, 152.6, 151.6, 151.3, 137.3, 137.0, 131.6, 130.8, 130.6, 130.0, 129.2, 128.7, 128.4, 128.1, 128.0, 127.7, 127.6, 115.0, 114.8, 112.6, 109.4, 109.3, 85.8, 85.4, 84.5, 84.0, 83.1, 82.4, 82.3, 80.8, 80.5, 80.4, 73.4, 73.3, 70.3, 70.1, 67.7, 67.4, 58.8 (2), 58.4, 52.4, 52.3, 36.9, 35.6, 34.7, 31.6, 31.1, 30.3, 29.8, 28.1 (2), 28.0 (3), 27.0, 26.9, 26.3, 26.2, 25.6, 25.5, 25.0, 24.8; HRMS (ESI) *m/z* calcd for C<sub>47</sub>H<sub>66</sub>N<sub>2</sub>NaO<sub>15</sub> [M + Na]<sup>+</sup>921.4355, found 921.4369.

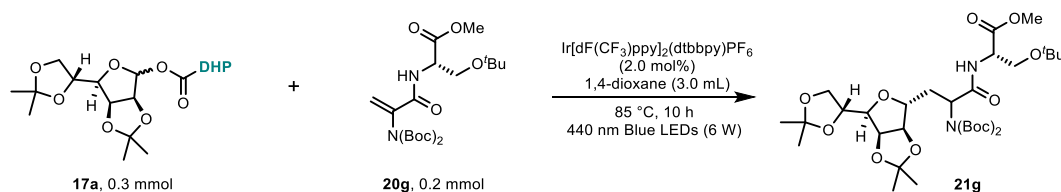

**Methyl *N*-(2-(bis(*tert*-butoxycarbonyl)amino)-3-((3*aR*,4*R*,6*R*,6*aS*)-6-((*R*)-2,2-dimethyl-1,3-dioxolan-4-yl)-2,2-dimethyltetrahydrofuro[3,4-*d*][1,3]dioxol-4-yl)propanoyl)-*O*-(*tert*-butyl)-*L*-serinate (21g).** According to the general procedure B, 4-((3*aS*,4*R*,6*R*,6*aS*)-6-((*S*)-2,2-dimethyl-1,3-dioxolan-4-yl)-2,2-dimethyltetrahydrofuro[3,4-*d*][1,3]dioxol-4-yl) 3,5-diethyl 2,6-dimethyl-1,4-dihydropyridine-3,4,5-tricarboxylate<sup>1</sup> **17a** (162 mg, 0.300 mmol, 1.50 equiv), (2-(di(*tert*-butoxycarbonyl)amino)acrylic-*L*-methionine **20g** (89.0 mg, 0.200 mmol, 1.00 equiv) and Ir[dF(CF<sub>3</sub>)ppy]<sub>2</sub>(dtbbpy)PF<sub>6</sub> (4.5 mg, 0.004 mmol, 0.020 equiv) were added to anhydrous 1,4-dioxane (3.00 mL). The reaction mixture was stirred at 85 °C under 6W blue LED irradiation for 10 h and afforded after chromatographic purification on SiO<sub>2</sub> (Petroleum ether: EtOAc = 2:1) **21g** (70.5 mg, 51%, d.r. = 1:1) as a colorless oil: <sup>1</sup>H NMR (400 MHz, CDCl<sub>3</sub>) δ 6.85 (d, *J* = 8.1 Hz, 0.29H), 6.58 (d, *J* = 8.1 Hz, 0.73H), 4.93 – 4.87 (m, 0.77H), 4.79 – 4.69 (m, 1.25H), 4.69 – 4.60 (m, 0.34H), 4.62 – 4.54 (m, 0.78H), 4.52 (d, *J* = 6.1 Hz, 1H), 4.39 – 4.30 (m, 1H), 4.22 (dd, *J* = 10.0, 5.1 Hz,



0.74H), 4.09 – 3.95 (m, 2.22H), 3.82 – 3.73 (m, 1.11H), 3.69 (d,  $J = 7.3$  Hz, 3H), 3.65 (dd,  $J = 8.4, 3.7$  Hz, 0.69H), 3.53 (dd,  $J = 9.0, 3.4$  Hz, 0.33H), 3.45 (dd,  $J = 9.0, 3.5$  Hz, 0.64H), 2.41 – 2.25 (m, 0.78H), 2.22 – 2.01 (m, 0.58H), 1.91 – 1.78 (m, 0.78H), 1.51 – 1.29 (m, 30H), 1.10 (d,  $J = 2.8$  Hz, 9H);  $^{13}\text{C}$  NMR (101 MHz,  $\text{CDCl}_3$ )  $\delta$  170.9, 170.7, 170.1, 169.9, 152.4, 152.0, 112.7, 112.6, 109.3, 109.2, 85.5, 85.4, 83.7, 83.6, 82.7, 80.9, 80.8, 80.7, 80.5, 80.1, 73.6, 73.5, 73.4, 73.3, 67.3, 67.2, 62.1, 61.8, 57.0, 56.6, 53.1, 53.0, 52.4, 52.3, 30.5, 30.3, 29.8, 29.5, 28.0(2), 27.3, 27.0, 26.2(2), 25.3(2), 24.9, 24.8; **HRMS** (ESI)  $m/z$  calcd for  $\text{C}_{33}\text{H}_{56}\text{O}_{13}\text{N}_2\text{Na}$  [ $\text{M} + \text{Na}$ ] $^+$  711.3675, found 711.3678.

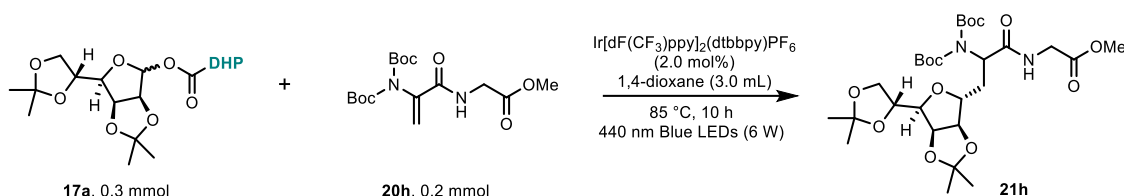

**Methyl (2-(bis(*tert*-butoxycarbonyl)amino)-3-((3*aR*,4*R*,6*R*,6*aS*)-6-((*R*)-2,2-dimethyl-1,3-dioxolan-4-yl)-2,2-dimethyltetrahydrofuro[3,4-*d*][1,3]dioxol-4-yl)propanoyl)glycinate (21h).** According to the general protocol B, 4-((3*aS*,6*R*,6*aS*)-6-((*S*)-2,2-dimethyl-1,3-dioxolan-4-yl)-2,2-dimethyltetrahydrofuro[3,4-*d*][1,3]dioxol-4-yl) 3,5-diethyl 2,6-dimethyl-1,4-dihydropyridine-3,4,5-tricarboxylate<sup>1</sup> **17a** (162 mg, 0.300 mmol, 1.50 equiv), *N,N*-*tert*-butoxycarbonyldehydroalanine<sup>3</sup> **20h** (71.6 mg, 0.200 mmol, 1.00 equiv),  $\text{Ir}[\text{dF}(\text{CF}_3)\text{ppy}]_2(\text{dtbbpy})\text{PF}_6$  (4.5 mg, 0.004 mmol, 0.02 equiv) were added to anhydrous 1,4-dioxane (3.00 mL). The reaction mixture was stirred in 6W Blue LEDs under  $\text{N}_2$  at 85 °C for 10 h and afforded after chromatographic purification on  $\text{SiO}_2$  (Petroleum ether: EtOAc = 3:1) **21h** (59.0 mg, 49%, d.r. = 1.1:1) as an oil:  $^1\text{H}$  NMR (400 MHz,  $\text{CDCl}_3$ )  $\delta$  6.62 (t,  $J = 5.2$  Hz, 0.62H), 6.39 (t,  $J = 5.2$  Hz, 0.38H), 4.94 (t,  $J = 6.6$  Hz, 0.38H), 4.79 – 4.74 (m, 1.28H), 4.55 (d,  $J = 6.0$  Hz, 1.01H), 4.38 – 4.32 (m, 1H), 4.25 (dd,  $J = 10.3, 4.8$  Hz, 0.38H), 4.13 – 3.93 (m, 4.29H), 3.77 – 3.74 (m, 3.38H), 3.67 (dd,  $J = 8.3, 3.7$  Hz, 0.38H), 2.40 – 2.32 (m, 0.39H), 2.27 – 2.20 (m, 0.62H), 2.13 – 2.05 (m, 0.62H), 1.93 – 1.85 (m, 0.39H), 1.50 – 1.49 (m, 19.03H), 1.42 – 1.41 (m, 2.62H), 1.36 – 1.25 (m, 7.99H), 1.14 (d,  $J = 6.4$  Hz, 0.38H).  $^{13}\text{C}$  NMR (101 MHz,  $\text{CDCl}_3$ )  $\delta$  170.6, 170.2, 152.6, 152.2, 112.8(2), 109.3, 85.7, 85.5, 84.1, 83.8, 82.9, 81.1, 80.9, 80.8, 80.5, 80.0, 73.4, 67.3, 67.1, 57.0, 56.8, 52.5(2), 41.5(2), 30.8, 30.2, 28.1, 28.0, 27.1, 27.0, 26.3, 26.2, 25.4, 25.0, 24.9. **HRMS** (ESI)  $m/z$  calcd for  $\text{C}_{28}\text{H}_{46}\text{NNaO}_{12}$  [ $\text{M} + \text{Na}$ ] $^+$  625.2943, found 625.2945.

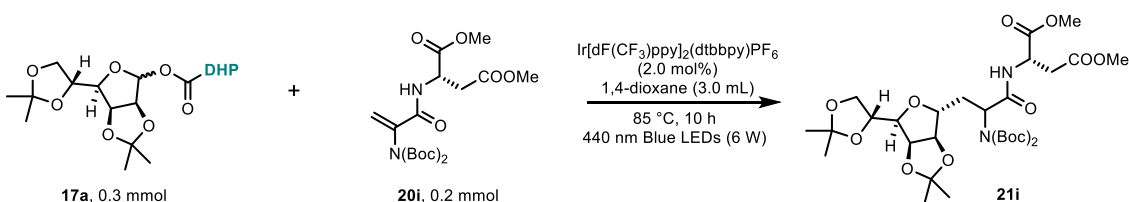

**Dimethyl (2-(bis(*tert*-butoxycarbonyl)amino)-3-((3*aR*,4*R*,6*R*,6*aS*)-6-((*R*)-2,2-dimethyl-1,3-dioxolan-4-yl)-2,2-dimethyltetrahydrofuro[3,4-*d*][1,3]dioxol-4-yl)propanoyl)-*L*-aspartate (21i).** According to the general procedure B, 4-((3*aS*,4*R*,6*R*,6*aS*)-6-((*S*)-2,2-dimethyl-1,3-dioxolan-4-yl)-2,2-dimethyltetrahydrofuro[3,4-*d*][1,3]dioxol-4-yl) 3,5-diethyl 2,6-dimethyl-1,4-dihydropyridine-3,4,5-tricarboxylate<sup>1</sup> **17a** (162 mg, 0.300 mmol, 1.50 equiv), (2-(di(*tert*-butoxycarbonyl)amino)acrylic)-*L*-dimethyl-aspartate **20i** (86.0 mg, 0.200 mmol, 1.00 equiv) and  $\text{Ir}[\text{dF}(\text{CF}_3)(\text{ppy})_2](\text{dtbbpy})\text{PF}_6$  (4.5 mg, 0.004 mmol, 0.020 equiv) were added to anhydrous 1,4-dioxane (3.00 mL). The reaction mixture was stirred at 85 °C under 6W blue LED irradiation for 10 h and afforded after chromatographic purification on  $\text{SiO}_2$  (Petroleum ether: EtOAc = 3:1) **21i** (70.0 mg, 52%, d.r. = 1.2:1) as a colorless oil:  $^1\text{H}$  NMR (400 MHz,  $\text{CDCl}_3$ )  $\delta$  7.00 (d,  $J =$

7.8 Hz, 0.67H), 6.85 (d,  $J = 8.1$  Hz, 0.29H), 4.92 – 4.68 (m, 3H), 4.54 (d,  $J = 6.1$  Hz, 1H), 4.41 – 4.30 (m, 1H), 4.24 (dd,  $J = 10.2$ , 4.9 Hz, 0.35H), 4.12 – 3.98 (m, 2.60H), 3.75 – 3.63 (m, 7H), 3.03 (d,  $J = 4.2$  Hz, 0.33H), 2.99 (d,  $J = 4.2$  Hz, 0.55H), 2.89 (d,  $J = 4.8$  Hz, 0.37H), 2.85 (d,  $J = 4.7$  Hz, 0.20H), 2.77 (d,  $J = 4.7$  Hz, 0.19H), 2.72 (d,  $J = 4.7$  Hz, 0.13H), 2.43 – 2.30 (m, 0.42H), 2.24 – 2.04 (m, 1.41H), 1.53 – 1.29 (m, 30H);  $^{13}\text{C}$  NMR (101 MHz,  $\text{CDCl}_3$ )  $\delta$  171.4, 171.3, 171.1, 171.0, 170.2, 169.8, 152.5, 152.1, 112.8, 112.7, 109.4, 109.3, 85.6, 85.5, 84.0, 83.9, 83.7, 82.8, 80.9, 80.8, 80.7, 80.5, 80.1, 73.4, 67.2, 56.9, 56.6, 52.9, 52.8, 52.1, 52.0, 48.8, 48.7, 36.3, 36.1, 31.0, 30.5, 29.5, 28.0(2), 27.1, 27.0, 26.3, 26.2, 25.3, 24.9, 24.8; **HRMS** (ESI)  $m/z$  calcd for  $\text{C}_{31}\text{H}_{50}\text{O}_{14}\text{N}_2\text{Na}$  [ $\text{M} + \text{Na}$ ] $^+$  697.3154, found 697.3162.

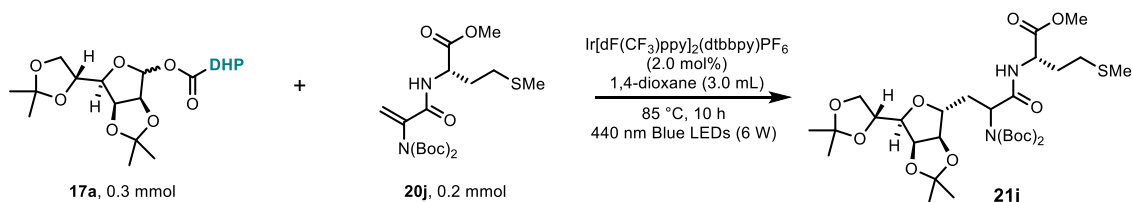

**Methyl (2-(bis(*tert*-butoxycarbonyl)amino)-3-((3*aR*,4*R*,6*R*,6*aS*)-6-((*R*)-2,2-dimethyl-1,3-dioxolan-4-yl)-2,2-dimethyltetrahydrofuro[3,4-*d*][1,3]dioxol-4-yl)propanoyl)-*L*-methioninate (21j).** According to the general procedure B, 4-((3*aS*,4*R*,6*R*,6*aS*)-6-((*S*)-2,2-dimethyl-1,3-dioxolan-4-yl)-2,2-dimethyltetrahydrofuro[3,4-*d*][1,3]dioxol-4-yl) 3,5-diethyl 2,6-dimethyl-1,4-dihydropyridine-3,4,5-tricarboxylate<sup>1</sup> **17a** (162 mg, 0.300 mmol, 1.50 equiv), (2-(di(*tert*-butoxycarbonyl)amino)acrylic-*L*-methionine **20j** (86.5 mg, 0.200 mmol, 1.00 equiv) and  $\text{Ir[dF(CF}_3\text{)ppy]}_2\text{(dtbbpy)PF}_6$  (4.5 mg, 0.004 mmol, 0.020 equiv) were added to anhydrous 1,4-dioxane (3.00 mL). The reaction mixture was stirred at 85 °C under 6W blue LED irradiation for 10 h and afforded after chromatographic purification on  $\text{SiO}_2$  (Petroleum ether: EtOAc = 3:1) to afford **21j** (46.5 mg, 34%, d.r. = 1:1) as a colorless oil:  $^1\text{H}$  NMR (400 MHz,  $\text{CDCl}_3$ )  $\delta$  6.78 (d,  $J = 7.7$  Hz, 0.43H), 6.62 (d,  $J = 7.5$  Hz, 0.44H), 4.90 – 4.63 (m, 3H), 4.53 (dd,  $J = 6.1$ , 2.5 Hz, 1H), 4.39 – 4.29 (m, 1H), 4.22 (dd,  $J = 10.2$ , 4.9 Hz, 0.53H), 4.12 – 3.98 (m, 2H), 3.80 – 3.68 (m, 4H), 3.65 (dd,  $J = 8.3$ , 3.7 Hz, 0.45H), 2.54 – 2.44 (m, 2H), 2.42 – 2.34 (m, 0.43H), 2.21 – 2.04 (m, 5.37H), 2.03 – 1.92 (m, 1H), 1.91 – 1.80 (m, 0.57H), 1.55 – 1.23 (m, 30H);  $^{13}\text{C}$  NMR (101 MHz,  $\text{CDCl}_3$ )  $\delta$  172.4, 172.2, 170.3, 169.8, 152.6, 152.2, 112.8, 112.7, 109.4, 109.3, 85.6, 85.5, 84.1, 83.8, 82.9, 80.9, 80.8, 80.7, 80.5, 80.1, 73.4, 67.2(2), 57.1, 56.7, 52.7, 52.6, 51.9, 51.8, 31.9, 31.7, 30.5, 30.0, 29.9, 29.6, 28.1, 28.0, 27.1(2), 26.3, 26.2, 25.3(2), 24.9(2), 15.6, 15.4; **HRMS** (ESI)  $m/z$  calcd for  $\text{C}_{31}\text{H}_{52}\text{O}_{12}\text{N}_2\text{SNa}$  [ $\text{M} + \text{Na}$ ] $^+$  699.3133, found 699.3135.

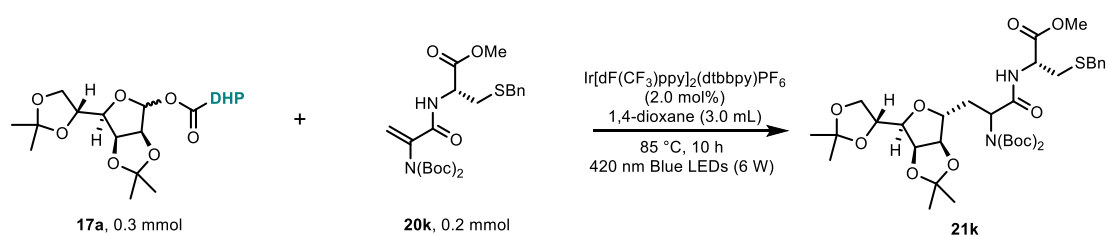

**Methyl *S*-benzyl-*N*-(2-(bis(*tert*-butoxycarbonyl)amino)-3-((3*aR*,4*R*,6*R*,6*aS*)-6-((*R*)-2,2-dimethyl-1,3-dioxolan-4-yl)-2,2-dimethyltetrahydrofuro[3,4-*d*][1,3]dioxol-4-yl)propanoyl)-*L*-cysteinate (21k).** According to the general procedure B, 4-((3*aS*,4*R*,6*R*,6*aS*)-6-((*S*)-2,2-dimethyl-1,3-dioxolan-4-yl)-2,2-dimethyltetrahydrofuro[3,4-*d*][1,3]dioxol-4-yl) 3,5-diethyl 2,6-dimethyl-1,4-dihydropyridine-3,4,5-tricarboxylate<sup>1</sup> **17a** (162 mg, 0.300 mmol, 1.50 equiv), (2-(di(*tert*-butoxycarbonyl)amino)acrylic-*L*-*S*-benzylcysteine **20k** (86.5 mg, 0.200 mmol, 1.00 equiv) and  $\text{Ir[dF(CF}_3\text{)ppy]}_2\text{(dtbbpy)PF}_6$  (4.5 mg, 0.004 mmol, 0.020 equiv) were added to anhydrous 1,4-dioxane (3.00 mL). The reaction mixture was stirred at 85 °C under

6W blue LED irradiation for 20 h and afforded after chromatographic purification on SiO<sub>2</sub> (Petroleum ether: EtOAc = 3:1) to afford **21k** (78.3 mg, 53%, d.r. = 1:1) as a colorless oil: <sup>1</sup>H NMR (400 MHz, CDCl<sub>3</sub>) δ 7.33 – 7.20 (m, 5H), 6.83 (d, *J* = 7.7 Hz, 0.52H), 6.65 (d, *J* = 7.6 Hz, 0.41H), 4.89 (t, *J* = 6.5 Hz, 0.48H), 4.82 – 4.71 (m, 2.69H), 4.54 (dd, *J* = 6.2, 2.1 Hz, 1H), 4.39 – 4.32 (m, 1H), 4.23 (dd, *J* = 10.2, 4.8 Hz, 0.47H), 4.12 – 3.98 (m, 2.63H), 3.77 – 3.64 (m, 7H), 2.92 – 2.76 (m, 2.22H), 2.42 – 2.34 (m, 0.52H), 2.26 – 2.06 (m, 1.23H), 1.91 – 1.81 (m, 0.52H), 1.49 (d, *J* = 1.9 Hz, 21H), 1.41 (d, *J* = 5.8 Hz, 3H), 1.35 (d, *J* = 3.1 Hz, 3H), 1.32 (d, *J* = 4.8 Hz, 3H); <sup>13</sup>C NMR (101 MHz, CDCl<sub>3</sub>) δ 171.3, 171.0, 170.2, 169.8, 152.5, 152.2, 137.6(2), 129.0(2), 128.6, 127.3, 127.3, 112.7(2), 109.3(2), 85.5, 85.4, 84.0, 83.7, 82.8, 80.9, 80.8, 80.7, 80.5, 80.1, 73.3, 67.2, 56.9, 56.7, 52.7, 52.6, 52.0, 51.9, 36.6, 36.5, 33.4, 33.3, 30.6, 29.7, 28.1, 28.0, 27.0, 26.2(2), 25.3(2), 24.9, 24.8; HRMS (ESI) *m/z* calcd for C<sub>36</sub>H<sub>54</sub>O<sub>12</sub>N<sub>2</sub>NaS [M + Na]<sup>+</sup> 761.3290, found 761.3293.

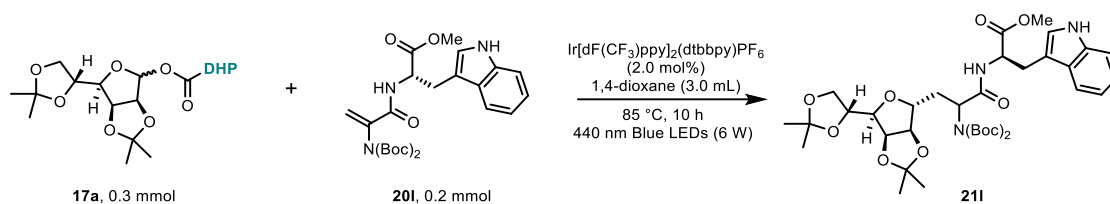

**Methyl (2-(bis(*tert*-butoxycarbonyl)amino)-3-((3*aR*,4*R*,6*R*,6*aS*)-6-((*R*)-2,2-dimethyl-1,3-dioxolan-4-yl)-2,2-dimethyltetrahydrofuro[3,4-*d*][1,3]dioxol-4-yl)propanoyl)-*D*-tryptophanate (**21I**).** According to the general procedure B, 4-((3*aS*,4*R*,6*R*,6*aS*)-6-((*S*)-2,2-dimethyl-1,3-dioxolan-4-yl)-2,2-dimethyltetrahydrofuro[3,4-*d*][1,3]dioxol-4-yl) 3,5-diethyl 2,6-dimethyl-1,4-dihydropyridine-3,4,5-tricarboxylate<sup>1</sup> **17a** (162 mg, 0.300 mmol, 1.50 equiv), (2-(di(*tert*-butoxycarbonyl)amino)acryloyl)-*L*-tryptophanate<sup>2</sup> **20I** (86.5 mg, 0.200 mmol, 1.00 equiv) and Ir[dF(CF<sub>3</sub>)ppy]<sub>2</sub>(dtbbpy)PF<sub>6</sub> (4.5 mg, 0.004 mmol, 0.020 equiv) were added to anhydrous 1,4-dioxane (3.00 mL). The reaction mixture was stirred at 85 °C under 6W blue LED irradiation for 10 h and afforded after chromatographic purification on SiO<sub>2</sub> (Petroleum ether: EtOAc = 3:1) to afford **21I** (94.7 mg, 65%, d.r. = 1.2:1) as a colorless oil: <sup>1</sup>H NMR (400 MHz, CDCl<sub>3</sub>) δ 8.18 (d, *J* = 19.7 Hz, 1H), 7.52 (d, *J* = 7.7 Hz, 1H), 7.33 (d, *J* = 8.3 Hz, 1H), 7.20 – 7.06 (m, 2H), 7.01 (t, *J* = 3.5 Hz, 1H), 6.48 (d, *J* = 7.6 Hz, 1H), 4.93 – 4.83 (m, 2H), 4.75 (dd, *J* = 6.0, 3.7 Hz, 1H), 4.53 (d, *J* = 6.1 Hz, 1H), 4.42 – 4.32 (m, 1H), 4.28 – 4.18 (m, 1H), 4.15 – 4.00 (m, 2H), 3.72 – 3.59 (m, 4H), 3.30 (d, *J* = 5.4 Hz, 2H), 2.45 – 2.29 (m, 1H), 1.92 – 1.80 (m, 1H), 1.49 – 1.32 (m, 30H); <sup>13</sup>C NMR (101 MHz, CDCl<sub>3</sub>) δ 172.1, 169.4, 152.1, 136.2, 127.6, 123.0, 122.3, 119.8, 118.7, 112.7, 111.3, 110.0, 109.3, 85.6, 83.9, 82.8, 80.8, 80.5, 73.5, 67.2, 57.0, 53.1, 52.4, 30.7, 28.1, 28.0, 27.1, 26.3, 25.3, 25.0; HRMS (ESI) *m/z* calcd for C<sub>37</sub>H<sub>53</sub>O<sub>12</sub>N<sub>3</sub>Na [M + Na]<sup>+</sup> 754.3521, found 754.3530.

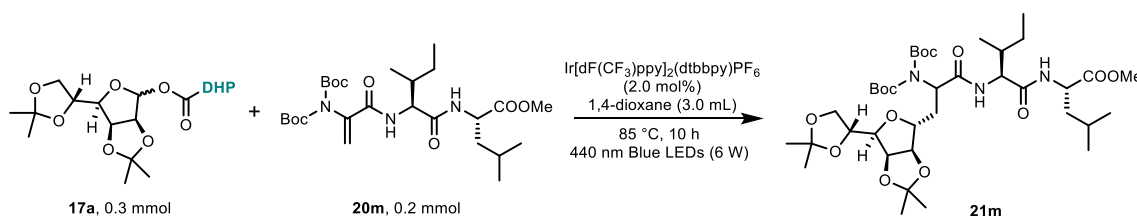

**Methyl (2-(bis(*tert*-butoxycarbonyl)amino)-3-((3*aR*,4*R*,6*R*,6*aS*)-6-((*R*)-2,2-dimethyl-1,3-dioxolan-4-yl)-2,2-dimethyltetrahydrofuro[3,4-*d*][1,3]dioxol-4-yl)propanoyl)-*L*-alloisoleucyl-*L*-leucinate (**21m**).** According to the general protocol B, 4-((3*aS*,6*R*,6*aS*)-6-((*S*)-2,2-dimethyl-1,3-dioxolan-4-yl)-2,2-dimethyltetrahydrofuro[3,4-*d*][1,3]dioxol-4-yl) 3,5-diethyl 2,6-dimethyl-1,4-dihydropyridine-3,4,5-tricarboxylate<sup>1</sup> **17a** (162 mg, 0.300 mmol, 1.50 equiv), methyl (2-(bis(*tert*-butoxycarbonyl)amino)acryloyl)-*L*-alloisoleucyl-*L*-leucinate **20m** (105 mg, 0.200 mmol, 1.00 equiv), Ir[dF(CF<sub>3</sub>)ppy]<sub>2</sub>(dtbbpy)PF<sub>6</sub> (4.5 mg,



0.004 mmol, 0.020 equiv) were added to anhydrous 1,4-dioxane (3.00 mL). The reaction mixture was stirred at 85 °C under 6W Blue LEDs for 10 h and afforded after chromatographic purification on SiO<sub>2</sub> (Petroleum ether: EtOAc = 1:1) **21m** (87.9 mg, 57%, d.r. = 1.4:1) as a foam: <sup>1</sup>H NMR (400 MHz, CDCl<sub>3</sub>) δ 6.57 (d, *J* = 8.4 Hz, 0.39H), 6.49 (d, *J* = 8.4 Hz, 0.61H), 6.41 (d, *J* = 8.1 Hz, 0.39H), 6.17 (d, *J* = 8.0 Hz, 0.61H), 4.83 – 4.72 (m, 2H), 4.59 – 4.49 (m, 2H), 4.38 – 4.31 (m, 1H), 4.30 – 4.19 (m, 1.61H), 4.08 – 3.99 (m, 2.39H), 3.75 – 3.70 (m, 3.39H), 3.65 (dd, *J* = 8.3, 3.7 Hz, 0.61H), 2.45 – 2.38 (m, 0.61H), 2.29 – 2.21 (m, 0.39H), 2.09 – 1.93 (m, 1H), 1.82 – 1.77 (m, 1H), 1.76 – 1.53 (m, 4H), 1.50 – 1.48 (m, 18H), 1.45 – 1.40 (m, 5.61H), 1.35 – 1.31 (m, 6.39H), 1.15 – 1.06 (m, 1H), 0.93 – 0.86 (m, 12H); <sup>13</sup>C NMR (101 MHz, CDCl<sub>3</sub>) δ 173.2, 173.0, 170.7(2), 170.4, 169.9, 152.7, 152.4, 112.8, 112.7, 109.4, 109.3, 85.6, 85.5, 84.1, 83.9, 82.8, 80.9, 80.8, 80.6, 80.5, 80.2, 73.4, 67.3(2), 58.0, 57.9, 57.0, 56.9, 52.4, 52.3, 50.9(2), 41.4, 41.3, 37.4, 37.1, 30.6, 29.8, 29.4, 28.1, 28.0, 27.1, 27.0, 26.2(2), 25.3(2), 25.0, 24.9, 24.8, 22.9, 22.8, 22.0, 21.9, 15.6, 15.4, 11.6, 11.5; HRMS (ESI) *m/z*: [M + Na]<sup>+</sup> calcd for C<sub>38</sub>H<sub>65</sub>N<sub>3</sub>NaO<sub>13</sub> 794.4410; found 794.4406.

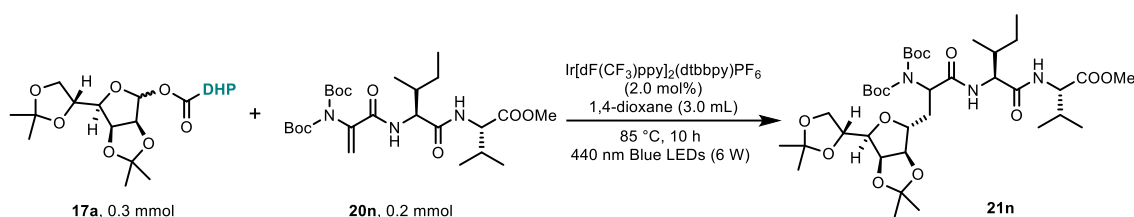

**Methyl (2-(bis(*tert*-butoxycarbonyl)amino)-3-((3*aR*,4*R*,6*R*,6*aS*)-6-((*R*)-2,2-dimethyl-1,3-dioxolan-4-yl)-2,2-dimethyltetrahydrofuro[3,4-*d*][1,3]dioxol-4-yl)propanoyl)-*L*-alloisoleucyl-*L*-valinate (21n).**

According to the general protocol B, 4-((3*aS*,6*R*,6*aS*)-6-((*S*)-2,2-dimethyl-1,3-dioxolan-4-yl)-2,2-dimethyltetrahydrofuro[3,4-*d*][1,3]dioxol-4-yl) 3,5-diethyl 2,6-dimethyl-1,4-dihydropyridine-3,4,5-tricarboxylate<sup>1</sup> **17a** (162 mg, 0.300 mmol, 1.50 equiv), methyl (2-(bis(*tert*-butoxycarbonyl)amino)acryloyl)-*L*-alloisoleucyl-*L*-valinate **20n** (103 mg, 0.200 mmol, 1.00 equiv), Ir[dF(CF<sub>3</sub>)ppy]<sub>2</sub>(dtbbpy)PF<sub>6</sub> (4.5 mg, 0.004 mmol, 0.020 equiv) were added to anhydrous 1,4-dioxane (3.00 mL). The reaction mixture was stirred at 85 °C under 6W Blue LEDs for 10 h and afforded after chromatographic purification on SiO<sub>2</sub> (Petroleum ether: EtOAc = 1:1) **21n** (80.2 mg, 53%, d.r. = 1.2:1) as a foam: <sup>1</sup>H NMR (400 MHz, CDCl<sub>3</sub>) δ 6.65 (d, *J* = 8.4 Hz, 0.48H), 6.51 (d, *J* = 8.3 Hz, 0.52H), 6.43 (d, *J* = 8.6 Hz, 0.48H), 6.29 (d, *J* = 8.6 Hz, 0.52H), 4.82 – 4.72 (m, 2H), 4.54 – 4.43 (m, 2H), 4.37 – 4.25 (m, 2H), 4.20 (dd, *J* = 10.3, 4.8 Hz, 0.52H), 4.07 – 3.99 (m, 2.48H), 3.75 – 3.71 (m, 3.52H), 3.64 (dd, *J* = 8.3, 3.7 Hz, 0.48H), 2.44 – 2.38 (m, 0.52H), 2.27 – 2.03 (m, 2H), 1.93 (s, 2H), 1.87 – 1.79 (m, 1H), 1.49 – 1.39 (m, 25.52H), 1.35 – 1.30 (m, 6.52H), 1.20 – 1.05 (m, 1.48H), 0.92 – 0.86 (m, 12H); <sup>13</sup>C NMR (101 MHz, CDCl<sub>3</sub>) δ 172.1(2), 170.9, 170.8, 170.5, 169.9, 152.7, 152.4, 112.7(2), 109.4, 109.3, 85.6, 85.5, 84.1, 83.8, 82.9, 80.9, 80.8, 80.6, 80.5, 80.2, 73.4, 67.3, 67.2, 58.0(2), 57.4, 57.3, 57.1, 56.9, 52.3, 52.2, 37.3, 37.2, 31.2, 31.0, 30.5, 29.5, 28.1, 28.0, 27.1, 27.0, 26.3, 26.2, 25.3(2), 25.0, 24.9(2), 24.8, 19.1, 18.1, 17.9, 15.6, 15.5, 11.6, 11.5; HRMS (ESI) *m/z* calcd for C<sub>37</sub>H<sub>63</sub>N<sub>3</sub>NaO<sub>13</sub> [M + Na]<sup>+</sup> 780.4253, found 780.4260.

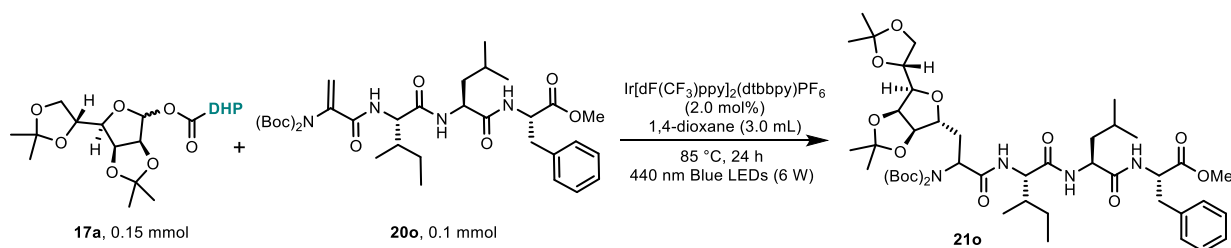

**Methyl (2-(bis(*tert*-butoxycarbonyl)amino)-3-((3*aR*,4*R*,6*R*,6*aS*)-6-((*R*)-2,2-dimethyl-1,3-dioxolan-4-yl)-2,2-dimethyltetrahydrofuro[3,4-*d*][1,3]dioxol-4-yl)propanoyl)-*L*-alloisoleucyl-*L*-leucyl-*L*-**

**phenylalaninate (21o).** According to the general protocol B, 4-((3*aS*,6*R*,6*aS*)-6-((*S*)-2,2-dimethyl-1,3-dioxolan-4-yl)-2,2-dimethyltetrahydrofuro[3,4-*d*][1,3]dioxol-4-yl) 3,5-diethyl 2,6-dimethyl-1,4-dihydropyridine-3,4,5-tricarboxylate<sup>1</sup> **17a** (81.0 mg, 0.150 mmol, 1.50 equiv), methyl (2-(bis(*tert*-butoxycarbonyl)amino)acryloyl)-*L*-alloisoleucyl-*L*-leucyl-*L*-phenylalaninate **20o** (67.4 mg, 0.100 mmol, 1.0 equiv), Ir[dF(CF<sub>3</sub>)ppy]<sub>2</sub>(dtbbpy)PF<sub>6</sub> (2.3 mg, 0.002 mmol, 0.02 equiv) were added to anhydrous 1,4-dioxane (3.00 mL). The reaction mixture was stirred at 85 °C under 6W Blue LEDs for 24 h and afforded after chromatographic purification on SiO<sub>2</sub> (Petroleum ether: Acetone = 1:1) **21o** (57.0 mg, 62%, d.r. = 1.2:1) as a foam: <sup>1</sup>H NMR (400 MHz, CD<sub>3</sub>CN) δ 7.31 – 7.26 (m, 2H), 7.25 – 7.22 (m, 1H), 7.21 – 7.17 (m, 2H), 7.08 (d, *J* = 7.8 Hz, 0.55H), 6.99 (d, *J* = 7.7 Hz, 0.45H), 6.79 (d, *J* = 8.1 Hz, 1H), 6.67 (d, *J* = 7.0 Hz, 0.55H), 6.56 (d, *J* = 7.4 Hz, 0.45H), 4.89 (dd, *J* = 7.6, 5.8 Hz, 0.45H), 4.73 (dd, *J* = 10.3, 4.4 Hz, 0.55H), 4.68 – 4.64 (m, 1H), 4.59 – 4.55 (m, 1H), 4.53 – 4.52 (m, 0.55H), 4.47 (dd, *J* = 6.0, 0.9 Hz, 0.55H), 4.31 – 4.21 (m, 2H), 4.16 – 4.06 (m, 1.55H), 4.00 – 3.97 (m, 1.45H), 3.93 – 3.88 (m, 1H), 3.74 – 3.71 (m, 0.45H), 3.64 – 3.61 (m, 3.55H), 3.12 – 3.05 (m, 1H), 3.02 – 2.95 (m, 1H), 2.24 – 2.22 (m, 0.55H), 1.91 – 1.87 (m, 0.45H), 1.51 – 1.47 (m, 20H), 1.40 – 1.38 (m, 3.35H), 1.35 – 1.34 (m, 3H), 1.28 – 1.26 (m, 6.65H), 0.90 – 0.82 (m, 15H); <sup>13</sup>C NMR (101 MHz, CD<sub>3</sub>CN) δ 172.8, 172.7, 171.9, 171.8, 171.6, 171.2, 153.7, 153.3, 138.0, 137.8, 130.3, 130.3, 129.4, 129.3, 127.8, 127.7, 112.9, 112.7, 109.6(2), 86.4, 86.0, 84.4, 84.2, 84.0, 82.0, 81.7, 81.6, 81.2, 81.0, 74.0, 67.8, 67.8, 59.2, 58.1, 57.6, 54.7, 52.6(2), 52.5(2), 42.4, 41.4, 41.3, 38.2, 38.1, 37.9, 37.8, 36.9, 30.9, 30.8, 29.8, 29.1, 28.2(2), 27.1(2), 26.4, 25.7, 25.6, 25.4(2), 25.3, 24.9(2), 23.5, 23.3(2), 22.9, 21.7, 21.6, 19.7, 16.1, 11.8, 11.7; HRMS (ESI) *m/z* calcd for C<sub>47</sub>H<sub>74</sub>N<sub>4</sub>NaO<sub>14</sub> [M + Na]<sup>+</sup> 941.5094, found 941.5104.

### Unsuccessful examples

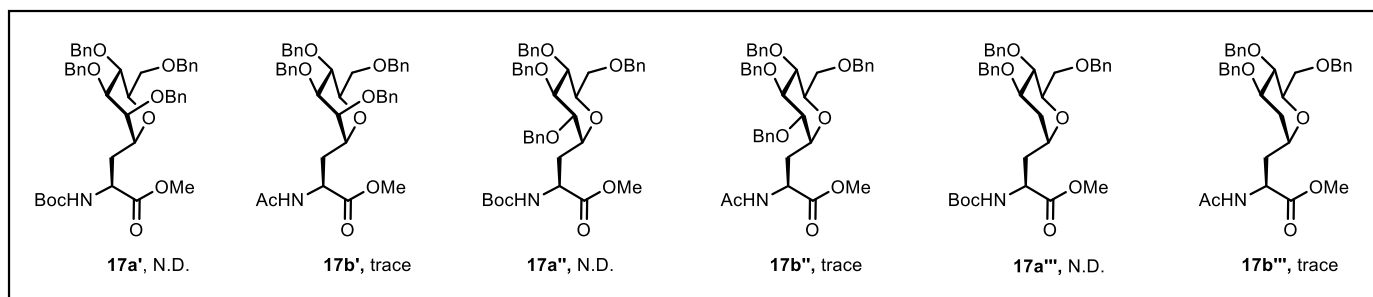

Glycosyl esters (1.50 equiv), chiral dehydroalanines (1.00 equiv), Ir[dF(CF<sub>3</sub>)ppy]<sub>2</sub>(dtbbpy)PF<sub>6</sub> (2.0 mol%) were added to a one-dram vial with a screw-top septum, and the vial was then evacuated and refilled with N<sub>2</sub> (3×). Anhydrous 1,4-dioxane (3.00 mL) were added, and the reaction mixture was stirred at 85 °C under 6W blue LED irradiation for 10 h or 20 h, cooled to rt. It is worth noting that the upper edge of the heating block submerges up 1/3 of the reaction mixture. The experimental results showed that no target compounds (**17a**, **17a''**, **17a'''**) were detected, there are some residual raw materials and by-products of the protonation of glycosyl esters; At the same time, only trace of product (**17b'**, **17b''**, **17b'''**) formation can be detected in HRMS, the by-product is also the protonation of glycosyl esters.

## 5. Detailed Experimental Procedures for Preparation of Glycosyl 4-Formate-1,4-dihydropyridine

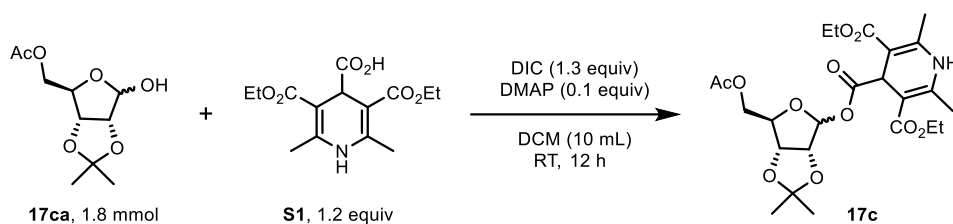

**4-((3*aR*,6*R*,6*aR*)-6-(Acetoxymethyl)-2,2-dimethyltetrahydrofuro[3,4-*d*][1,3]dioxol-4-yl) 3,5-diethyl 2,6-dimethyl-1,4-dihydropyridine-3,4,5-tricarboxylate (**17c**). According to the general protocol D, 3,5-bis(ethoxycarbonyl)-2,6-dimethyl-1,4-dihydropyridine-4-carboxylic acid<sup>1</sup> **S1** (653 mg, 2.20 mmol, 1.20 equiv), DIC (290 mg, 2.30 mmol, 1.30 equiv) and DMAP (24.4 mg, 0.180 mmol, 0.100 equiv) were added to a solution of ((3*aR*,4*R*,6*aR*)-6-hydroxy-2,2-dimethyltetrahydrofuro[3,4-*d*][1,3]dioxol-4-yl)methyl (2*S*)-2-(6-methoxynaphthalen-2-yl)propanoate<sup>9</sup> **17ca** (410 mg, 1.80 mmol, 1.00 equiv) in DCM (10.0 mL) at rt. After stirring for 12h, the reaction mixture was concentrated *in vacuo* and afforded after flash column chromatographic purification on SiO<sub>2</sub> (Petroleum ether: EtOAc = 2:1) **17c** (653 mg, β and α mixture, 71%) as a light-yellow foam: <sup>1</sup>H NMR (400 MHz, CDCl<sub>3</sub>) δ 6.16 (s, 1H), 6.08 (s, 1H), 4.85 (s, 1H), 4.66 (d, *J* = 5.9 Hz, 1H), 4.60 (d, *J* = 5.9 Hz, 1H), 4.43 – 4.35 (m, 1H), 4.23 – 4.17 (m, 4H), 4.02 – 3.94 (m, 2H), 2.31 (d, *J* = 2.9 Hz, 6H), 2.09 (s, 3H), 1.47 (s, 3H), 1.32 – 1.27 (m, 9H); <sup>13</sup>C NMR (101 MHz, CDCl<sub>3</sub>) δ 171.2, 170.8, 167.1, 167.0, 146.1, 146.0, 113.3, 102.3, 98.4, 98.1, 85.2, 85.1, 82.0, 64.2, 60.3(2), 40.6, 26.5, 25.2, 20.9, 19.5, 19.4, 14.5; HRMS (ESI) *m/z* calcd for C<sub>24</sub>H<sub>33</sub>NNaO<sub>11</sub> [M + Na]<sup>+</sup> 534.1946, found 534.1944.**

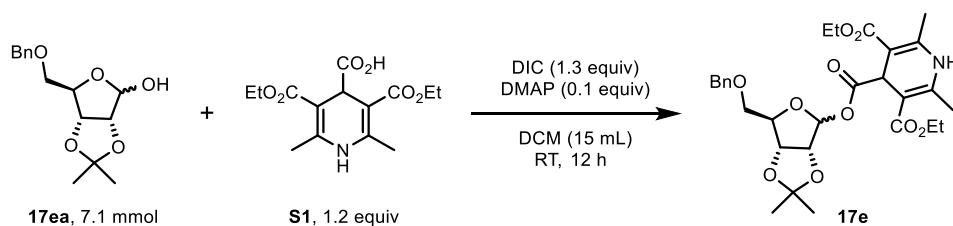

**4-((3*aR*,6*R*,6*aR*)-6-((Benzyloxy)methyl)-2,2-dimethyltetrahydrofuro[3,4-*d*][1,3]dioxol-4-yl) 3,5-diethyl 2,6-dimethyl-1,4-dihydropyridine-3,4,5-tricarboxylate (**17e**). According to the general protocol D, 3,5-bis(ethoxycarbonyl)-2,6-dimethyl-1,4-dihydropyridine-4-carboxylic acid<sup>1</sup> **S1** (2.50 g, 8.50 mmol, 1.20 equiv), DIC (1.20 g, 9.30 mmol, 1.30 equiv) and DMAP (86.0 mg, 0.710 mmol, 0.100 equiv) were added to a solution of (3*aR*,6*R*,6*aR*)-6-((benzyloxy)methyl)-2,2-dimethyltetrahydrofuro[3,4-*d*][1,3]dioxol-4-ol<sup>10</sup> **17ea** (2.00 g, 7.10 mmol, 1.00 equiv) in DCM (15.0 mL) at rt. After stirring for 12h, the reaction mixture was concentrated *in vacuo* and afforded after flash column chromatographic purification on SiO<sub>2</sub> (Petroleum ether: EtOAc = 3:1) **17e** (2.20 g, β and α mixture, 56%) as a light-yellow oil: <sup>1</sup>H NMR (400 MHz, CDCl<sub>3</sub>) δ 7.34 – 7.31 (m, 4H), 7.29 – 7.26 (m, 1H), 6.32 (s, 1H), 6.11 (s, 1H), 4.84 (s, 1H), 4.74 (d, *J* = 5.9 Hz, 1H), 4.60 (d, *J* = 6.0 Hz, 1H), 4.57 (s, 2H), 4.41 (dd, *J* = 9.3, 5.6 Hz, 1H), 4.21 – 4.10 (m, 4H), 3.50 – 3.39 (m, 2H), 2.25 – 2.24 (m, 6H), 1.47 (s, 3H), 1.30 – 1.23 (m, 9H); <sup>13</sup>C NMR (101 MHz, CDCl<sub>3</sub>) δ 172.3, 167.1, 167.0, 146.3, 146.1, 138.1, 128.5, 127.8, 127.6, 113.0, 102.6, 98.1, 97.7, 86.1, 85.1, 82.2, 73.2, 70.3, 60.2, 60.1, 40.4, 26.5, 25.1, 19.2(2), 14.5(2); HRMS (ESI) *m/z* calcd for C<sub>29</sub>H<sub>37</sub>NNaO<sub>10</sub> [M + Na]<sup>+</sup> 582.2310, found 582.2309.**

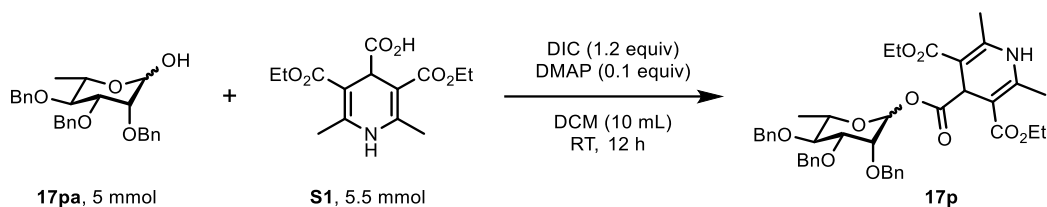

**3,5-Diethyl 4-((3R,4R,5S,6S)-3,4,5-tris(benzyloxy)-6-methyltetrahydro-2H-pyran-2-yl) 2,6-dimethyl-1,4-dihydropyridine-3,4,5-tricarboxylate (17p).** According to the general protocol D, 3,5-bis(ethoxycarbonyl)-2,6-dimethyl-1,4-dihydropyridine-4-carboxylic acid<sup>1</sup> **S1** (1.64 g, 5.50 mmol, 1.10 equiv), DIC (756 mg, 6.00 mmol, 1.20 equiv) and DMAP (61.0 mg, 0.500 mmol, 0.100 equiv) were added to a solution of (3R,4R,5S,6S)-3,4,5-tris(benzyloxy)-6-methyltetrahydro-2H-pyran-2-ol<sup>11</sup> **17pa** (2.17 g, 5.00 mmol, 1.00 equiv) in DCM (10.0 mL) at rt. After stirring for 12h, the reaction mixture was concentrated *in vacuo* and afforded after flash column chromatographic purification on SiO<sub>2</sub> (Petroleum ether: EtOAc = 3:1) **17p** (2.0 g,  $\beta$  and  $\alpha$  mixture, 56%) as a white foam: <sup>1</sup>H NMR (400 MHz, CDCl<sub>3</sub>)  $\delta$  7.49 – 7.46 (m, 2H), 7.34 – 7.23 (m, 13H), 5.95 (s, 1H), 5.52 (s, 1H), 5.01 (s, 1H), 4.91 (dd,  $J$  = 11.5, 4.5 Hz, 2H), 4.63 (dd,  $J$  = 18.3, 11.5 Hz, 2H), 4.49 – 4.42 (m, 2H), 4.21 – 4.12 (m, 4H), 3.91 (d,  $J$  = 2.8 Hz, 1H), 3.60 – 3.50 (m, 2H), 3.45 – 3.38 (m, 1H), 2.28 – 2.27 (m, 6H), 1.34 – 1.24 (m, 12H); <sup>13</sup>C NMR (101 MHz, CDCl<sub>3</sub>)  $\delta$  172.3, 167.1, 146.1, 139.0, 138.5, 138.2, 128.5(2), 128.3, 128.2, 128.1, 127.8, 127.7(2), 127.6, 98.5, 98.3, 94.3, 81.8, 79.7, 75.5, 74.6, 74.2, 72.9, 71.5, 60.4, 60.3, 40.8, 19.5(2), 18.0, 14.5(2); HRMS (ESI)  $m/z$  calcd for C<sub>41</sub>H<sub>47</sub>NNaO<sub>10</sub> [M + Na]<sup>+</sup> 736.3092, found 736.3094.

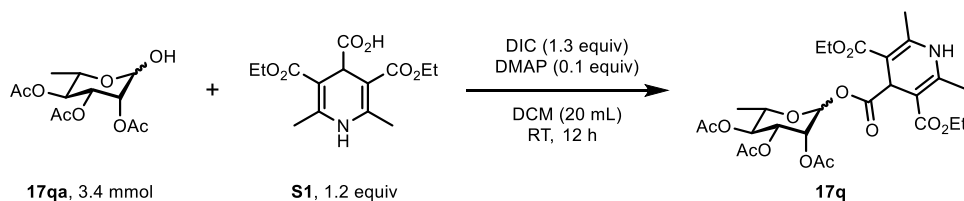

**3,5-Diethyl 4-((3R,4R,5S,6S)-3,4,5-triacetoxy-6-methyltetrahydro-2H-pyran-2-yl) 2,6-dimethyl-1,4-dihydropyridine-3,4,5-tricarboxylate (17q).** According to the general protocol D, 3,5-bis(ethoxycarbonyl)-2,6-dimethyl-1,4-dihydropyridine-4-carboxylic acid<sup>1</sup> **S1** (1.12 g, 4.08 mmol, 1.20 equiv), DIC (557 mg, 4.42 mmol, 1.30 equiv) and DMAP (42.0 mg, 0.340 mmol, 0.100 equiv) were added to a solution of (3R,4R,5S,6S)-2-hydroxy-6-methyltetrahydro-2H-pyran-3,4,5-triyl triacetate<sup>6</sup> **17qa** (1.00 g, 3.40 mmol, 1.00 equiv) in DCM (20.0 mL) at rt. After stirring for 12h, the reaction mixture was concentrated *in vacuo* and afforded after flash column chromatographic purification on SiO<sub>2</sub> (Petroleum ether: EtOAc = 1:1) **17q** (420 mg,  $\beta$  and  $\alpha$  mixture, 22%) as a white foam: <sup>1</sup>H NMR (400 MHz, CDCl<sub>3</sub>)  $\delta$  6.17 (s, 1H), 6.06 (s, 1H), 5.91 (d,  $J$  = 1.9 Hz, 1H), 5.71 (d,  $J$  = 1.2 Hz, 1H), 5.39 (dd,  $J$  = 2.9, 1.2 Hz, 1H), 5.21 – 5.16 (m, 2H), 5.10 – 4.98 (m, 3H), 4.98 – 4.94 (m, 2H), 4.28 – 4.12 (m, 10H), 3.88 – 3.81 (m, 1H), 3.62 – 3.55 (m, 1H), 2.36 – 2.28 (m, 14H), 2.20 (s, 4H), 2.14 (s, 3H), 2.06 – 2.04 (m, 7H), 1.98 – 1.97 (m, 3H), 1.33 – 1.23 (m, 18H), 1.18 (d,  $J$  = 6.2 Hz, 3H); <sup>13</sup>C NMR (101 MHz, CDCl<sub>3</sub>)  $\delta$  171.6, 170.6, 170.4, 170.1, 170.0, 167.0, 166.9, 146.0(2), 98.2, 97.9, 90.8, 71.5, 71.0, 70.6, 70.4, 69.0, 68.7, 68.4, 60.4, 60.2(2), 40.5, 40.2, 20.9, 20.8, 20.7, 19.4(3), 19.3, 17.5, 17.4, 14.5, 14.4; HRMS (ESI)  $m/z$  calcd for C<sub>26</sub>H<sub>35</sub>NNaO<sub>13</sub> [M + Na]<sup>+</sup> 592.2001, found 592.1998.

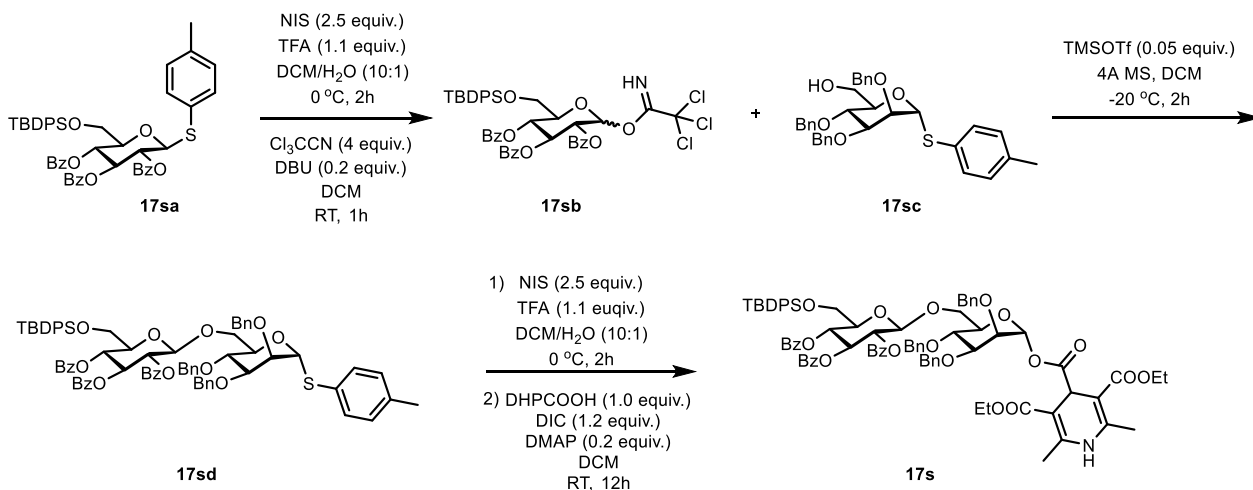

**3,5-Diethyl 4-((2*R*,3*S*,4*S*,5*R*,6*R*)-3,4,5-tris(benzyloxy)-6-(((2*R*,3*R*,5*R*,6*R*)-3,4,5-tris(benzyloxy)-6-(((*tert*-butyldiphenylsilyloxy)methyl)tetrahydro-2*H*-pyran-2-yl)oxy)methyl)tetrahydro-2*H*-pyran-2-yl) 2,6-dimethyl-1,4-dihydropyridine-3,4,5-tricarboxylate (17s).** NIS (9.30 g, 41.25 mmol, 2.50 equiv) and TFA (673 mg, 5.90 mmol, 1.10 equiv) were added to a solution of **17sa**<sup>12</sup> (13.8 g, 16.5 mmol, 1.00 equiv) in a mixture of DCM/H<sub>2</sub>O (88.0 mL, 10:1 v/v) at 0 °C. The reaction was allowed to proceed under stirring for 2 h at rt and quenched with Et<sub>3</sub>N. The mixture was washed with 20% (w/w) aqueous Na<sub>2</sub>S<sub>2</sub>O<sub>3</sub> (30.0 mL) and saturated aqueous NaHCO<sub>3</sub> (80.0 mL). The organic layer was separated, and the aqueous layer was reextracted with DCM (2 × 80.0 mL). The organic phase was dried over anhydrous Na<sub>2</sub>SO<sub>4</sub> and the solvent was removed. The crude product was purified by short column on SiO<sub>2</sub> (petroleum ether: EtOAc = 5:1) to give the hemiacetal (9.50 g, 79%). The hemiacetal (9.50 g, 13.0 mmol, 1.00 equiv) was treated with trichloroacetimidate glycosyl donor **7sb** as a white foam. Freshly activated 4Å MS (3.00 g), the above **17sb**, ((2*R*,3*R*,4*S*,5*S*,6*R*)-3,4,5-tris(benzyloxy)-6-(*p*-tolylthio)tetrahydro-2*H*-pyran-2-yl)methanol<sup>13</sup> **17sc** (6.60 g, 12.2 mmol, 1.00 equiv) and anhydrous DCM (60.0 mL) were successively added into a flame dried glassware. The mixture was cooled to -20 °C and TMSOTf (135.4 mg, 0.610 mmol, 0.050 equiv) was added. After stirring at this temperature for 2 h, the resulting mixture was filtered through a pad of silica, concentrated, and purified by column chromatography on SiO<sub>2</sub> (Petroleum ether: EtOAc = 5:1) to afford **17sd** (10.2 g, 74%) as a white foam: <sup>1</sup>H NMR (400 MHz, CDCl<sub>3</sub>) δ 7.98 – 7.91 (m, 6H), 7.80 – 7.78 (m, 2H), 7.67 – 7.65 (m, 2H), 7.60 – 7.55 (m, 1H), 7.47 – 7.30 (m, 26H), 7.29 – 7.27 (m, 3H), 7.25 – 7.24 (m, 1H), 7.18 – 7.16 (m, 2H), 5.90 (t, *J* = 9.6, 9.6 Hz, 1H), 5.73 – 5.64 (m, 3H), 4.91 (d, *J* = 7.9 Hz, 1H), 4.79 (d, *J* = 12.7 Hz, 1H), 4.68 – 4.61 (m, 2H), 4.57 (s, 2H), 4.48 (d, *J* = 11.2 Hz, 1H), 4.33 – 4.20 (m, 2H), 4.06 – 3.97 (m, 3H), 3.93 – 3.82 (m, 4H), 2.39 (s, 3H), 1.10 (s, 9H); <sup>13</sup>C NMR (101 MHz, CDCl<sub>3</sub>) δ 166.0, 165.1, 165.0, 138.6, 138.3, 138.1, 137.5, 135.7, 135.6, 133.3, 133.1, 133.0, 132.8, 131.6, 130.9, 130.0, 129.9, 129.8 (2), 129.7 (2), 129.6, 129.3, 129.1, 128.4, 128.3 (3), 128.0, 127.7 (3), 127.6, 101.3, 86.2, 80.2, 75.9, 75.3, 74.8, 74.5, 73.5, 72.8, 72.1, 71.8, 71.7, 69.4, 68.3, 62.8, 26.7, 21.2, 19.2; HRMS (ESI) *m/z* calcd for C<sub>77</sub>H<sub>76</sub>NaO<sub>13</sub>SSi [M + Na]<sup>+</sup> 1291.4668, found 1291.4689.

NIS (1.20 g, 5.00 mmol, 2.50 equiv) and TFA (250 mg, 2.20 mmol, 1.10 equiv) were added to a solution of **17sd** (2.30 g, 2.00 mmol, 1.00 equiv) in a mixture of DCM/H<sub>2</sub>O (22.0 mL, 10:1 v/v) at 0 °C. The reaction was allowed to stir at rt for 2 h and quenched with Et<sub>3</sub>N. The mixture was washed with 20% (w/w) aqueous Na<sub>2</sub>S<sub>2</sub>O<sub>3</sub> (20.0 mL) and saturated aqueous NaHCO<sub>3</sub> (20.0 mL). The organic layer was separated, reextracted

with DCM (2 × 20 mL), dried over anhydrous Na<sub>2</sub>SO<sub>4</sub>, and concentrated. The crude product was purified by short column on SiO<sub>2</sub> to obtain the hemiacetal (1.15 g, 50%). According to the general protocol D, 3,5-bis(ethoxycarbonyl)-2,6-dimethyl-1,4-dihydropyridine-4-carboxylic acid<sup>1</sup> **S1** (297 mg, 1.00 mmol, 1.00 equiv), DIC (151 mg, 1.20 mmol, 1.20 equiv) and DMAP (24.4 mg, 0.200 mmol, 0.200 equiv) were added to a solution of the above hemiacetal (1.15 g, 1.00 mmol, 1.00 equiv) in DCM (10.0 mL) at rt and stirred for 12 h. The reaction mixture was concentrated and afforded after chromatographic purification on SiO<sub>2</sub> (Toluene: ether: EtOAc = 3:1) **17s** (620 mg, β and α mixture, 44%) as a white foam: <sup>1</sup>H NMR (400 MHz, CDCl<sub>3</sub>) δ 7.92 – 7.87 (m, 6H), 7.78 – 7.75 (m, 2H), 7.64 – 7.55 (m, 6H), 7.53 – 7.47 (m, 2H), 7.42 (t, *J* = 7.8, 7.8 Hz, 2H), 7.38 – 7.29 (m, 16H), 7.27 – 7.26 (m, 2H), 7.25 – 7.22 (m, 2H), 5.82 – 5.72 (m, 2H), 5.56 – 5.52 (m, 2H), 5.33 (s, 1H), 5.16 (d, *J* = 8.0 Hz, 1H), 5.03 (d, *J* = 12.2 Hz, 1H), 4.87 (d, *J* = 10.9 Hz, 1H), 4.74 (d, *J* = 12.2 Hz, 1H), 4.51 – 4.43 (m, 2H), 4.39 – 4.29 (m, 4H), 4.23 (dd, *J* = 10.8, 7.1 Hz, 1H), 4.19 – 4.13 (m, 1H), 4.12 – 4.07 (m, 1H), 4.04 (d, *J* = 2.8 Hz, 1H), 4.01 – 3.95 (m, 2H), 3.90 – 3.82 (m, 2H), 3.64 – 3.60 (m, 1H), 3.52 – 3.47 (m, 2H), 2.66 (s, 3H), 2.21 (s, 3H), 1.39 (t, *J* = 7.1, 7.1 Hz, 3H), 1.27 (t, *J* = 7.1, 7.1 Hz, 3H), 1.08 (s, 9H). <sup>13</sup>C NMR (101 MHz, CDCl<sub>3</sub>) δ 172.1, 167.2, 167.2, 167.1, 165.2, 164.9, 147.1, 146.3, 138.7, 138.0, 137.9, 135.8, 135.6, 133.7, 133.4, 133.3, 133.0, 130.0, 129.9, 129.7, 129.7, 129.3, 129.1, 128.6, 128.5, 128.5, 128.5, 128.5, 128.4, 128.3, 128.2, 128.0, 127.9, 127.7, 127.7, 127.6, 101.0, 98.6, 97.7, 94.5, 81.7, 78.4, 75.2, 74.9, 74.4, 74.4, 74.0, 73.4, 71.6, 71.3, 69.4, 66.9, 62.7, 60.3, 60.2, 39.8, 26.7, 19.6, 19.3, 18.7, 14.6, 14.5. HRMS (ESI) *m/z* calcd for C<sub>84</sub>H<sub>87</sub>NNaO<sub>19</sub>Si [M + Na]<sup>+</sup> 1464.5534, found 1464.5540.

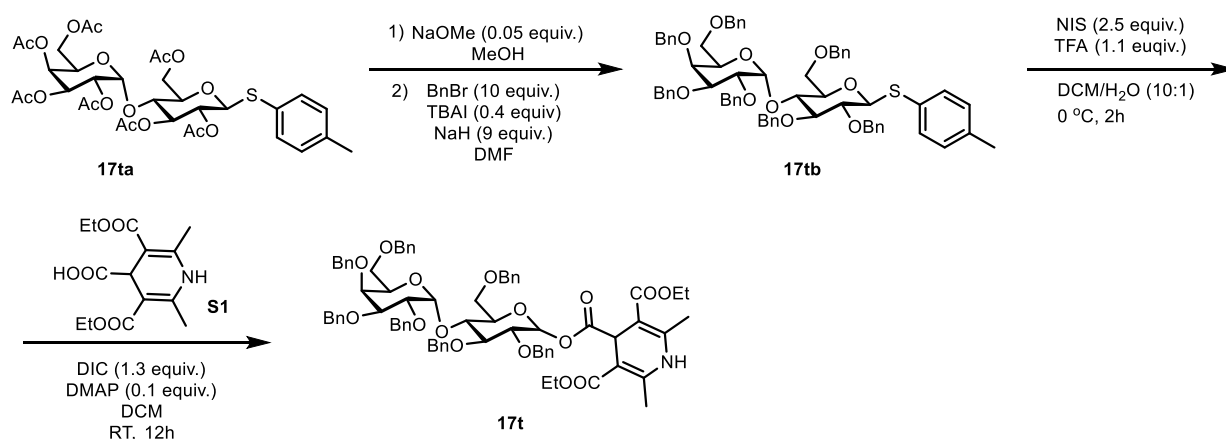

**4-((3*R*,4*S*,5*R*,6*R*)-3,4-Bis(benzyloxy)-6-((benzyloxy)methyl)-5-(((2*R*,3*R*,4*S*,5*S*,6*R*)-3,4,5-tris(benzyloxy)-6-((benzyloxy)methyl)tetrahydro-2*H*-pyran-2-yl)oxy)tetrahydro-2*H*-pyran-2-yl) 3,5-diethyl 2,6-dimethyl-1,4-dihydropyridine-3,4,5-tricarboxylate (**17t**). 30% NaOMe in MeOH (58 mg, 0.31 mmol, 0.1 equiv) was added a solution of (2*R*,3*S*,4*S*,5*R*,6*R*)-2-(acetoxymethyl)-6-(((2*R*,3*R*,4*S*,5*R*,6*S*)-4,5-diacetoxy-2-(acetoxymethyl)-6-(*p*-tolylthio)tetrahydro-2*H*-pyran-3-yl)oxy)tetrahydro-2*H*-pyran-3,4,5-triyl triacetate<sup>14</sup> **17ta** (2.30 g, 3.10 mmol, 1.00 equiv) in anhydrous MeOH (20.0 mL) at rt. The reaction mixture was stirred at 2 h, concentrated, and azeotroped with toluene (2×). A solution of the crude heptol (3.00 mmol, 1.00 equiv) and TBAI (443 mg, 1.20 mmol, 0.400 equiv) in anhydrous DMF (30.0 mL) was added NaH (60% in oil) (1.10 g, 27.0 mmol, 9.00 equiv) at 0 °C and stirred for 10 minutes. BnBr (5.13 g, 30.0 mmol, 10.0 equiv) was added dropwise to the resulting mixture at 0 °C. After warming up to rt and stirring overnight, the reaction mixture was poured into ice-water and extracted with EtOAc (3×). The combined organic extracts were washed with H<sub>2</sub>O (3×), brine (2×), dried over Na<sub>2</sub>SO<sub>4</sub>, and filtered. After solvent removal *in vacuo*, the residue afforded after chromatographic purification on SiO<sub>2</sub> (Petroleum ether: EtOAc = 6:1) the corresponding the benzylated lactopyranoside **17tb** (1.50 g, 47%) as a white foam: <sup>1</sup>H NMR (400 MHz, CDCl<sub>3</sub>) δ 7.53 – 7.51 (m, 2H), 7.48**

– 7.45 (m, 2H), 7.41 – 7.27 (m, 30H), 7.25 – 7.21 (m, 1H), 7.18 – 7.14 (m, 2H), 7.05 (d,  $J = 8.0$  Hz, 2H), 5.14 (d,  $J = 10.4$  Hz, 1H), 5.03 (d,  $J = 11.4$  Hz, 1H), 4.88 – 4.81 (m, 4H), 4.80 – 4.71 (m, 3H), 4.64 – 4.56 (m, 2H), 4.51 (d,  $J = 7.8$  Hz, 1H), 4.46 (d,  $J = 12.0$  Hz, 1H), 4.38 (d,  $J = 11.8$  Hz, 1H), 4.29 (d,  $J = 11.8$  Hz, 1H), 4.02 – 3.98 (m, 2H), 3.90 – 3.80 (m, 3H), 3.66 (t,  $J = 8.9, 8.9$  Hz, 1H), 3.58 (t,  $J = 7.8, 7.8$  Hz, 1H), 3.51 – 3.37 (m, 5H), 2.34 (s, 3H);  $^{13}\text{C}$  NMR (101 MHz,  $\text{CDCl}_3$ )  $\delta$  139.2, 139.0, 138.8, 138.6, 138.6, 138.5, 138.2, 137.7, 132.9, 129.7, 129.7, 128.5, 128.5, 128.5, 128.3, 128.3, 128.3, 128.3, 128.1, 128.0, 127.9, 127.8, 127.8, 127.6, 127.6, 127.5, 127.5, 127.4, 127.3, 102.9, 87.6, 85.1, 82.7, 80.1, 80.1, 79.5, 76.6, 75.7, 75.6, 75.4, 74.8, 73.7, 73.5, 73.1, 73.1, 72.7, 68.5, 68.1, 21.2; HRMS (ESI)  $m/z$  calcd for  $\text{C}_{68}\text{H}_{70}\text{NaO}_{10}\text{S}$  [ $\text{M} + \text{Na}$ ] $^+$  1101.4582, found 1101.4580.

NIS (788 mg, 3.50 mmol, 2.50 equiv) and TFA (182 mg, 1.60 mmol, 1.10 equiv) were added to a solution of **17tb** (1.50 g, 1.40 mmol, 1.00 equiv) in a mixture of DCM/ $\text{H}_2\text{O}$  (22.0 mL, 10:1 v/v) at 0 °C. The reaction was allowed to stir at rt for 2 h and quenched with  $\text{Et}_3\text{N}$ . After solvent removal in *vacuo*, the residue was dissolved in DCM (20.0 mL) and washed with 20% (w/w) aqueous  $\text{Na}_2\text{S}_2\text{O}_3$  (20.0 mL) and saturated aqueous  $\text{NaHCO}_3$  (20.0 mL). The organic layer was separated, and the aqueous layer was reextracted with DCM (2  $\times$  20 mL). The organic phase was dried over anhydrous  $\text{Na}_2\text{SO}_4$ , concentrated, and purified by short column on  $\text{SiO}_2$  to obtain the hemiacetal (1.10 g, 73%). According to the general protocol D, 3,5-bis(ethoxycarbonyl)-2,6-dimethyl-1,4-dihydropyridine-4-carboxylic acid<sup>1</sup> **S1** (386 mg, 1.30 mmol, 1.30 equiv), DIC (189 mg, 1.50 mmol, 1.50 equiv) and DMAP (24.4 mg, 0.200 mmol, 0.200 equiv) were added to a solution of the above hemiacetal (972 mg, 1.00 mmol, 1.00 equiv) in DCM (15.0 mL) at rt. After stirring for 12h, the reaction mixture was concentrated and purified by column chromatography on  $\text{SiO}_2$  (Toluene: EtOAc = 3:1) **17t** (620 mg,  $\beta$  and  $\alpha$  mixture, 49%) as a light-yellow foam:  $^1\text{H}$  NMR (400 MHz,  $\text{CDCl}_3$ )  $\delta$  7.41 – 7.27 (m, 31H), 7.25 – 7.19 (m, 2H), 7.16 – 7.12 (m, 2H), 6.22 – 6.21 (m, 1H), 5.63 (d,  $J = 7.9$  Hz, 1H), 5.09 (s, 1.45H), 5.06 (d,  $J = 6.6$  Hz, 1H), 5.02 (s, 0.55H), 4.86 – 4.79 (m, 3H), 4.78 – 4.74 (m, 3H), 4.72 – 4.69 (m, 1H), 4.61 (d,  $J = 11.5$  Hz, 1H), 4.56 (s, 0.45H), 4.52 (d,  $J = 4.2$  Hz, 1H), 4.50 (s, 0.55H), 4.42 – 4.37 (m, 2H), 4.31 (d,  $J = 11.8$  Hz, 1H), 4.26 – 4.16 (m, 3H), 4.15 – 4.08 (m, 2H), 3.97 (d,  $J = 2.9$  Hz, 1H), 3.89 (dd,  $J = 11.4, 3.2$  Hz, 1H), 3.81 (dd,  $J = 9.7, 7.7$  Hz, 1H), 3.66 – 3.58 (m, 3H), 3.55 – 3.51 (m, 1H), 3.48 – 3.39 (m, 4H), 2.27 (s, 3H), 2.18 (s, 3H), 1.28 – 1.23 (m, 6H).  $^{13}\text{C}$  NMR (101 MHz,  $\text{CDCl}_3$ )  $\delta$  172.6, 167.1, 167.1, 146.2, 146.0, 139.1, 138.9, 138.7, 138.7, 138.6, 138.3, 138.1, 128.5, 128.4, 128.3 (3), 128.2, 128.0 (2), 127.9, 127.8, 127.7, 127.6 (2), 127.5 (3), 127.4, 127.2, 102.6, 98.0, 97.8, 94.8, 83.0, 82.6, 80.6, 80.0, 76.0, 75.7, 75.6, 75.4, 74.8, 74.7, 73.7, 73.5, 73.1, 73.0, 72.7, 68.1, 67.6, 60.1 (2), 40.4, 19.2, 19.1, 14.5; HRMS (ESI)  $m/z$  calcd for  $\text{C}_{75}\text{H}_{81}\text{NNaO}_{16}$  [ $\text{M} + \text{Na}$ ] $^+$  1274.5448, found 1274.5453.

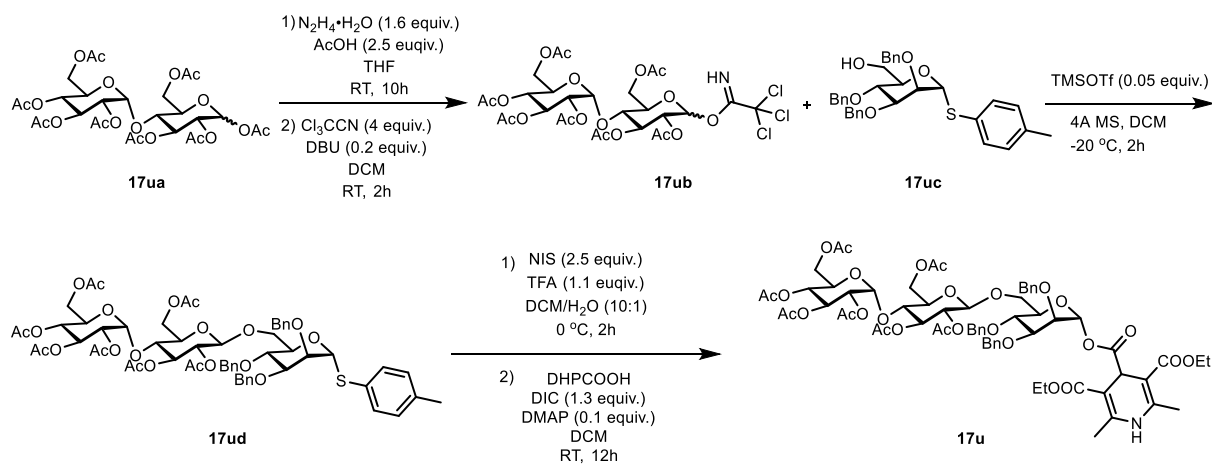

**3,5-Diethyl 4-((2R,3S,4S,5R,6R)-3,4,5-tris(benzyloxy)-6-(((2R,3R,4S,5R,6R)-3,4-diacetoxy-6-(acetoxymethyl)-5-(((2R,3R,4S,5R,6R)-3,4,5-triacetoxy-6-(acetoxymethyl)tetrahydro-2H-pyran-2-yl)oxy)tetrahydro-2H-pyran-2-yl)oxy)methyl)tetrahydro-2H-pyran-2-yl) 2,6-dimethyl-1,4-dihydropyridine-3,4,5-tricarboxylate (17u).** N<sub>2</sub>H<sub>4</sub>·H<sub>2</sub>O (43.8 mmol, 1.60 equiv) and AcOH (43.8 mmol, 2.50 equiv) were added to a solution of acetylated maltose **17ua** (17.5 mmol, 1.00 equiv) in THF (80.0 mL). The reaction was allowed to stir at rt for 10 h. The reaction mixture was concentrated, poured into ice-water and extracted with EtOAc (3×). The combined organic layer were dried over Na<sub>2</sub>SO<sub>4</sub>, filtered, concentrated, and purified by short column on SiO<sub>2</sub> (Petroleum ether: EtOAc, 1:1) to give the acetylated maltosyl hemiacetal (4.35 g, 39%). The resulted hemiacetal (5.00 mmol, 1.00 equiv) was treated with trichloroacetonitrile (20.0 mmol, 4.00 equiv) in anhydrous DCM (30.0 mL) in the presence of DBU (1.00 mmol, 0.200 equiv). After stirring at rt for 2 h, the reaction mixture was concentrated and purified by short column on SiO<sub>2</sub> (Petroleum ether: EtOAc, 1:1) to afford the curde **17ub**. Freshly activated 4Å MS, the above trichloroacetimidate glycosyl donor **17ub** (5.00 mmol, 1.00 equiv), ((2R,3R,4S,5S,6R)-3,4,5-tris(benzyloxy)-6-(*p*-tolylthio)tetrahydro-2H-pyran-2-yl)methanol<sup>13</sup> **17uc** (4.00 mmol, 0.800 equiv) and anhydrous DCM (30.0 mL) were successively added into a flame dried glassware. The mixture was cooled to -20 °C and TMSOTf (0.25 mmol, 0.05 equiv.) was added. The resulting mixture was stirred at this temperature for 2 h, filtered through a pad of silica and concentrated. The residue was purified by column chromatography on SiO<sub>2</sub> (petroleum ether: EtOAc = 10:1) to afford **17ud** (1.45 g, 24%) as a white foam: <sup>1</sup>H NMR (400 MHz, CDCl<sub>3</sub>) δ 7.41 – 7.06 (m, 19H), 5.48 (d, *J* = 1.7 Hz, 1H), 5.43 – 5.34 (m, 2H), 5.19 (t, *J* = 9.1 Hz, 1H), 5.06 (t, *J* = 9.9 Hz, 1H), 4.98 (d, *J* = 11.2 Hz, 1H), 4.91 – 4.81 (m, 2H), 4.71 (d, *J* = 12.3 Hz, 1H), 4.63 – 4.53 (m, 4H), 4.49 (d, *J* = 7.9 Hz, 1H), 4.43 (dd, *J* = 12.1, 2.7 Hz, 1H), 4.30 – 4.20 (m, 2H), 4.17 (dd, *J* = 12.1, 4.3 Hz, 1H), 4.07 – 3.92 (m, 5H), 3.91 – 3.81 (m, 3H), 3.50 – 3.44 (m, 1H), 2.34 (s, 3H), 2.09 (d, *J* = 6.4 Hz, 9H), 2.04 – 1.98 (m, 9H), 1.91 (s, 3H); <sup>13</sup>C NMR (101 MHz, CDCl<sub>3</sub>) δ 170.5 (2), 170.3, 169.9, 169.6, 169.4, 138.4, 138.0, 137.8, 137.7, 132.0, 130.7, 130.4, 129.9, 128.5, 128.4(2), 128.2(2), 128.0, 127.9, 127.8(3), 100.3, 95.5, 86.3, 80.0, 76.0, 75.5, 75.1, 74.6, 73.0, 72.7, 72.1, 71.9(2), 71.8, 70.0, 69.3, 68.4(2), 68.0, 62.8, 61.5, 60.4, 21.1, 20.9, 20.8, 20.7, 20.6(3), 14.2; HRMS (ESI) *m/z*: [M + Na]<sup>+</sup> calcd for C<sub>60</sub>H<sub>70</sub>NaSO<sub>22</sub> 1197.3972; found 1197.3991.

NIS (652 mg, 2.90 mmol, 2.00 equiv) and TFA (182 mg, 1.60 mmol, 1.10 equiv) were added to a solution of **17ud** (1.70 g, 1.45 mmol, 1.00 equiv) in a mixture of DCM/H<sub>2</sub>O (22.0 mL, 10:1 v/v) at 0 °C. The reaction was allowed to stir at rt for 2 h and quenched with Et<sub>3</sub>N. The mixture was washed with 20% (w/w) aqueous Na<sub>2</sub>S<sub>2</sub>O<sub>3</sub> (20 mL) and saturated aqueous NaHCO<sub>3</sub> (20 mL). The organic layer was separated, and the aqueous layer was reextracted with DCM (2 × 20 mL). The organic phase was dried over anhydrous Na<sub>2</sub>SO<sub>4</sub>, concentrated, and purified by short column on SiO<sub>2</sub> (Petroleum ether: EtOAc, 1:1) to afford the hemiacetal (1.35 g, 90%). According to the general protocol D, 3,5-bis(ethoxycarbonyl)-2,6-dimethyl-1,4-dihydropyridine-4-carboxylic acid<sup>1</sup> **S1** (357 mg, 1.20 mmol, 1.00 equiv), DIC (190 mg, 1.56 mmol, 1.30 equiv) and DMAP (0.240 mmol, 0.200 equiv) were added to a solution of the above hemiacetal (1.30 g, 1.20 mmol, 1.00 equiv) in DCM (15.0 mL) at rt. After stirring for 12h, the reaction mixture was concentrated and purified by column chromatography on SiO<sub>2</sub> (Hexane: Toluene: THF = 3:1:1) to afford **17u** (850 mg, β and α mixture, 53%) as a white foam: <sup>1</sup>H NMR (400 MHz, CDCl<sub>3</sub>) δ 7.50 – 7.46 (m, 2H), 7.35 – 7.22 (m, 13H), 6.78 (s, 1H), 5.54 (s, 1H), 5.38 – 5.33 (m, 2H), 5.13 (t, *J* = 9.3, 9.3 Hz, 1H), 5.07 – 5.02 (m, 2H), 4.95 – 4.89 (m, 2H), 4.85 (dd, *J* = 10.5, 3.9 Hz, 1H), 4.77 (dd, *J* = 9.6, 7.9 Hz, 1H), 4.67 (d, *J* = 12.1 Hz, 1H), 4.56 – 4.44 (m, 4H), 4.38 (d, *J* = 11.8 Hz, 1H), 4.26 – 4.11 (m, 6H), 4.04 – 3.90 (m, 5H), 3.76 (dd, *J* = 12.3, 6.9 Hz, 1H), 3.66 (t, *J* = 9.3, 9.3 Hz, 1H), 3.55 – 3.45 (m, 3H), 2.36 (s, 6H), 2.11 – 2.09 (m, 6H), 2.05 – 2.01 (m, 12H), 1.92 (s, 3H), 1.29 – 1.22 (m, 6H); <sup>13</sup>C NMR (101 MHz, CDCl<sub>3</sub>) δ 171.9, 171.0, 170.7, 170.5, 170.2, 170.1, 169.5, 167.1, 146.7,



145.8, 138.7, 138.2, 137.9, 128.6, 128.5, 128.4, 128.2, 128.0, 127.9, 127.8, 127.7 (2) 100.3, 98.2, 97.9, 95.7, 93.6, 81.7, 77.1, 75.7, 75.1, 74.3, 74.0, 73.7, 73.1, 72.0, 71.9, 71.4, 70.3, 69.4, 68.6, 68.1, 68.0, 62.7, 61.6, 60.4, 60.2, 40.1, 21.2, 21.0, 20.8, 20.7 (2), 20.5, 19.6, 19.1, 14.5 (2); **HRMS** (ESI)  $m/z$  calcd for  $C_{67}H_{81}NNaO_{28}$   $[M + Na]^+$  1370.4837, found 1370.4844.

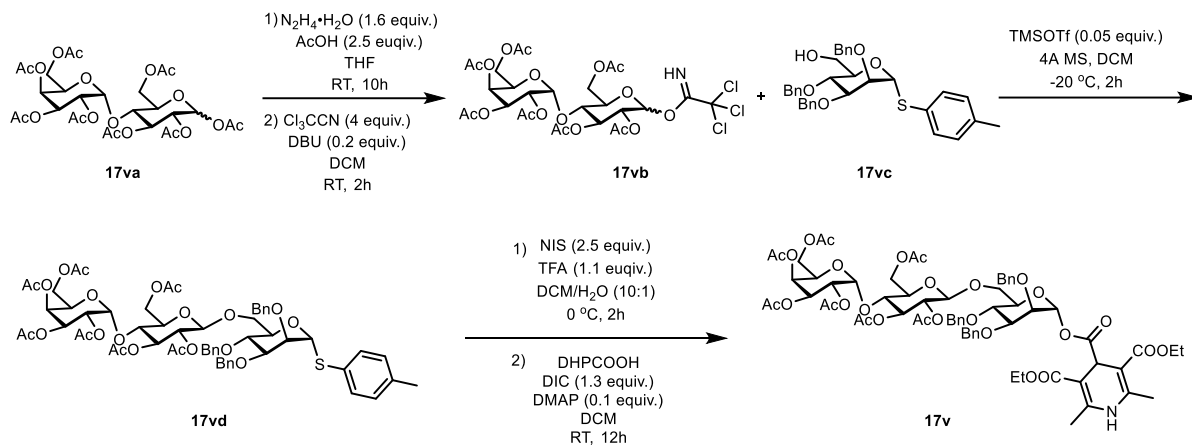

**3,5-Diethyl 4-(((2R,3S,4S,5R,6R)-3,4,5-tris(benzyloxy)-6-(((2R,3R,4S,5R,6R)-3,4-diacetoxy-6-(acetoxymethyl)-5-(((2R,3R,4S,5S,6R)-3,4,5-triacetoxy-6-(acetoxymethyl)tetrahydro-2H-pyran-2-yl)oxy)methyl)tetrahydro-2H-pyran-2-yl)oxy)methyl)tetrahydro-2H-pyran-2-yl) 2,6-dimethyl-1,4-dihydropyridine-3,4,5-tricarboxylate (17v).**

$N_2H_4 \cdot H_2O$  (1.60 g, 32.0 mmol, 1.60 equiv) and AcOH (3.00 g, 50.0 mmol, 2.50 equiv) were added to a solution of acetylated lactose **17va** (13.5 g, 20.0 mmol, 1.00 equiv) in THF (80.0 mL). After stirring at rt for 10 h, the mixture was concentrated, poured into ice-water, and extracted with EtOAc (3 $\times$ ). The combined organic layer were dried over  $Na_2SO_4$ , filtered, concentrated, purified by short column on  $SiO_2$  (Petroleum ether: EtOAc, 1:2) to give the acetylated lactosyl hemiacetal (7.80 g, 62%). The resulted hemiacetal (3.82 g, 6.00 mmol, 1.00 equiv) was treated with trichloroacetonitrile (3.46 g, 24.0 mmol, 4.00 equiv) in anhydrous DCM (15.0 mL) in the presence of DBU (182 mg, 1.20 mmol, 0.200 equiv). After stirring at rt for 2 h, the reaction mixture was concentrated and purified by short column on  $SiO_2$  (Petroleum ether: EtOAc = 1:1) to afford trichloroacetimidate glycosyl donor **17vb** as a white foam. Freshly activated 4Å MS, the above trichloroacetimidate glycosyl donor **17vb**, ((2R,3R,4S,5S,6R)-3,4,5-tris(benzyloxy)-6-(*p*-tolylthio) tetrahydro-2H-pyran-2-yl) methanol<sup>13</sup> **17vc** (2.78 g, 5.00 mmol, 1.00 equiv) and anhydrous DCM (30.0 mL) were successively added into a flame dried glassware. The mixture was cooled to -20 °C and TMSOTf (111 mg, 0.500 mmol, 0.100 equiv) was added. After stirring at this temperature for 2 h, the resulting mixture was filtered through a pad of silica, concentrated, and purified by column chromatography on  $SiO_2$  (Petroleum ether: EtOAc = 1.5:1) to afford **17vd** (3.20 g, 54%) as a white foam: **<sup>1</sup>H NMR** (400 MHz,  $CDCl_3$ )  $\delta$  7.37 – 7.27 (m, 17H), 7.16 – 7.13 (m, 2H), 5.47 (d,  $J$  = 1.8 Hz, 1H), 5.34 (dd,  $J$  = 3.4, 1.2 Hz, 1H), 5.14 – 5.08 (m, 2H), 4.98 – 4.89 (m, 3H), 4.72 – 4.69 (m, 1H), 4.59 – 4.56 (m, 4H), 4.47 – 4.42 (m, 3H), 4.25 – 4.21 (m, 1H), 4.15 – 3.98 (m, 5H), 3.87 – 3.73 (m, 5H), 3.43 – 3.39 (m, 1H), 2.35 (s, 3H), 2.15 (s, 3H), 2.05 – 2.03 (m, 11H), 1.97 – 1.93 (m, 6H); **<sup>13</sup>C NMR** (101 MHz,  $CDCl_3$ )  $\delta$  170.5 (2), 170.3, 170.2, 169.9, 169.7, 169.2, 138.4, 138.1, 137.9 (2), 132.0, 130.8, 130.1, 128.6 (2), 128.5 (2), 128.1, 128.0, 127.9 (4) 101.3, 100.6, 86.4, 80.1, 76.5, 76.1, 75.2, 74.8, 73.3, 73.1, 72.5, 72.0, 71.9, 71.8, 71.1, 70.7, 69.2, 68.4, 66.7, 62.1, 60.9, 21.2, 21.0, 20.9, 20.8, 20.7 (2), 20.6; **HRMS** (ESI)  $m/z$  calcd for  $C_{60}H_{70}NaO_{22}S$   $[M + Na]^+$  1197.3972, found 1197.3982.

NIS (956 mg, 4.25 mmol, 2.50 equiv) and TFA (213 mg, 1.87 mmol, 1.10 equiv) were added to a solution of

**17vd** (2.00 g, 1.70 mmol, 1.00 equiv) in a mixture of DCM/H<sub>2</sub>O (22.0 mL, 10:1 v/v) at 0 °C. The reaction was allowed to stir at rt for 2 h and quenched with Et<sub>3</sub>N. The mixture was washed with 20% (w/w) aqueous Na<sub>2</sub>S<sub>2</sub>O<sub>3</sub> (20.0 mL) and saturated aqueous NaHCO<sub>3</sub> (20.0 mL). The organic layer was separated, and the aqueous layer was reextracted with DCM (2 × 20.0 mL). The organic phase was dried over anhydrous Na<sub>2</sub>SO<sub>4</sub>, concentrated, purified by short column on SiO<sub>2</sub> (Petroleum ether: EtOAc = 1:1) to give the hemiacetal (1.60 g, 88%). According to the general protocol D, 3,5-bis(ethoxycarbonyl)-2,6-dimethyl-1,4-dihydropyridine-4-carboxylic acid<sup>1</sup> **S1** (445 mg, 1.50 mmol, 1.00 equiv), DIC (227 mg, 1.80 mmol, 1.20 equiv) and DMAP (36.6 mg, 0.300 mmol, 0.200 equiv) were added to a solution of the above hemiacetal (1.60 g, 1.50 mmol, 1.00 equiv) in DCM (15.0 mL) at rt. After stirring for 12h, the reaction mixture was concentrated and purified by column chromatography on SiO<sub>2</sub> (Hexane: Toluene: THF = 3:1:1) to afford **17v** (850 mg,  $\alpha$  and  $\beta$  mixture, 42% yield) as a white foam: <sup>1</sup>H NMR (400 MHz, CDCl<sub>3</sub>)  $\delta$  7.52 – 7.50 (m, 1.35H), 7.35 – 7.27 (m, 10H), 7.26 – 7.25 (m, 1H), 7.23 – 7.20 (m, 2.65H), 5.55 (s, 0.65H), 5.35 – 5.33 (m, 1H), 5.24 (d, *J* = 1.8 Hz, 0.35H), 5.18 – 5.05 (m, 2H), 4.98 – 4.87 (m, 3.65H), 4.85 – 4.80 (m, 1H), 4.72 – 4.69 (m, 1.35H), 4.60 – 4.40 (m, 6H), 4.36 – 4.33 (m, 0.65H), 4.26 – 4.04 (m, 6H), 4.03 – 3.94 (m, 2H), 3.91 – 3.68 (m, 5.35H), 3.59 – 3.48 (m, 2.35H), 3.45 – 3.41 (m, 0.65H), 2.35 – 2.33 (m, 4H), 2.14 (s, 3.35H), 2.11 (s, 2H), 2.07 – 2.03 (m, 11H), 1.99 – 1.95 (m, 6.65H), 1.42 (s, 0.65H), 1.33 – 1.21 (m, 5.35H); <sup>13</sup>C NMR (101 MHz, CDCl<sub>3</sub>)  $\delta$  171.5, 170.9, 170.7, 170.5, 170.4 (2), 170.2, 170.1 (3), 170.0, 169.8, 169.1, 167.2, 167.1, 147.1, 146.3, 138.6, 138.4 (2), 138.3, 137.9, 137.8, 128.5 (2), 128.4, 128.3 (2), 128.0, 127.9 (3), 127.8, 127.7 (4), 101.2, 101.1, 100.9, 100.7, 97.9, 97.2, 93.3, 92.6, 81.7, 79.8, 77.8, 76.0, 75.6, 75.2 (2), 75.0, 74.8, 74.4, 73.8, 73.5, 73.4, 72.9, 72.8, 72.7, 72.4, 72.0, 71.9, 71.3 (2), 71.0 (2), 70.9, 70.8, 70.7, 70.4, 69.2, 69.1, 67.4, 66.7 (2), 61.8, 61.7, 60.8, 60.2, 60.1, 39.5, 30.4, 21.0, 21.0 (2), 20.9, 20.8, 20.7 (2), 20.6 (3), 20.5, 19.5, 18.8, 14.5, 14.4; HRMS (ESI) *m/z* calcd for C<sub>67</sub>H<sub>81</sub>NNaO<sub>28</sub> [M + Na]<sup>+</sup> 1370.4837; found 1370.4841.

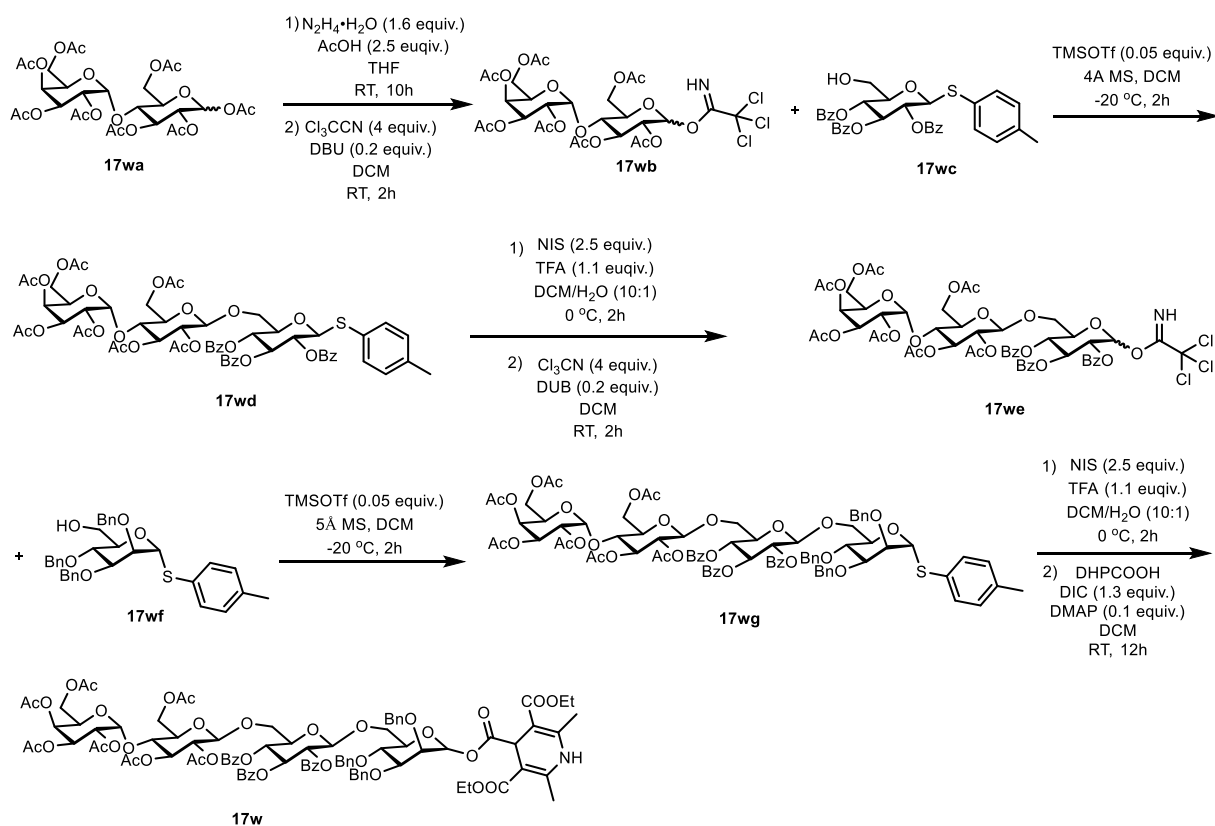

**3,5-Diethyl 4-(((3*S*,4*S*,5*R*,6*R*)-3,4,5-tris(benzyloxy)-6-(((2*R*,3*R*,5*R*,6*R*)-3,4,5-tris(benzyloxy)-6-(((2*R*,3*R*,4*S*,5*R*,6*R*)-3,4-diacetoxy-6-(acetoxymethyl)-5-(((2*R*,3*R*,4*S*,5*S*,6*R*)-3,4,5-triacetoxy-6-**

(acetoxymethyl)tetrahydro-2H-pyran-2-yl)oxy)tetrahydro-2H-pyran-2-yl)oxy)methyl)tetrahydro-2H-pyran-2-yl)oxy)methyl)tetrahydro-2H-pyran-2-yl) 2,6-dimethyl-1,4-dihydropyridine-3,4,5-tricarboxylate (**17w**). N<sub>2</sub>H<sub>4</sub>·H<sub>2</sub>O (1.60 g, 32.0 mmol, 1.60 equiv) and AcOH (3.00 g, 50.0 mmol, 2.50 equiv) were added to a solution of acetylated lactose **17wa** (13.5 g, 20.0 mmol, 1.00 equiv) in THF (80.0 mL). The reaction was allowed to stir at rt for 10 h. The mixture was concentrated under reduced pressure and the residue was poured into ice-water and extracted with EtOAc (3x). The combined organic layer were dried over Na<sub>2</sub>SO<sub>4</sub>, filtered, concentrated, and purified by short column on SiO<sub>2</sub> (Petroleum ether: EtOAc, 1:2) to give the acetylated lactosyl hemiacetal (7.80 g, 62%). The above acetylated lactosyl hemiacetal (5.10 g, 8.00 mmol, 1.00 equiv) was treated with trichloroacetonitrile (4.60 g, 32.0 mmol, 4.00 equiv) in anhydrous DCM (20.0 mL) in the presence of DBU (243 mg, 1.60 mmol, 0.200 equiv). After stirring at rt for 2 h, the reaction mixture was concentrated and purified by short column on SiO<sub>2</sub> (Petroleum ether: EtOAc, 1:1) to afford trichloroacetimidate glycosyl donor **17wb** as a white foam. Freshly activated 4Å MS (5.00 g), the aboved glycosyl donor **17wb** (8.00 mmol, 1.15 equiv), (2*R*,3*R*,4*S*,5*R*,6*S*)-2-(hydroxymethyl)-6-(*p*-tolylthio)tetrahydro-2H-pyran-3,4,5-triyl tribenzoate<sup>13</sup> **17wc** (4.20 g, 7.00 mmol, 1.00 equiv) and anhydrous DCM (50.0 mL) were successively added into a flame dried glassware. The mixture was cooled to -20°C and TMSOTf (155 mg, 0.7 mmol, 0.100 equiv) was added. After stirring at this temperature for 2 h, the reaction mixture was filtered through a pad of silica, concentrated, and purified by column chromatography on SiO<sub>2</sub> (Petroleum ether: EtOAc = 1.5:1) to afford **17wd** (4.50 g, 53%) as a white foam: <sup>1</sup>H NMR (400 MHz, DMSO-*d*<sub>6</sub>) δ 7.86 – 7.81 (m, 4H), 7.68 – 7.61 (m, 4H), 7.50 (dtd, *J* = 20.3, 7.6, 7.5, 5.3 Hz, 5H), 7.38 (t, *J* = 7.8, 7.8 Hz, 2H), 7.33 – 7.31 (m, 2H), 7.17 (d, *J* = 8.0 Hz, 2H), 5.97 (t, *J* = 9.4, 9.4 Hz, 1H), 5.49 (d, *J* = 9.9 Hz, 1H), 5.36 – 5.30 (m, 1H), 5.28 – 5.22 (m, 1H), 5.16 (dd, *J* = 10.2, 3.6 Hz, 1H), 5.13 – 5.08 (m, 1H), 4.83 (dd, *J* = 10.2, 8.0 Hz, 1H), 4.77 – 4.72 (m, 3H), 4.38 – 4.34 (m, 1H), 4.26 – 4.21 (m, 2H), 4.04 – 3.99 (m, 3H), 3.88 (d, *J* = 11.1 Hz, 1H), 3.80 – 3.74 (m, 2H), 3.68 – 3.63 (m, 1H), 2.31 (s, 3H), 2.09 (s, 3H), 2.00 – 1.98 (m, 9H), 1.93 – 1.89 (m, 9H); <sup>13</sup>C NMR (101 MHz, DMSO-*d*<sub>6</sub>) δ 170.6, 170.4, 170.3, 170.0, 169.8, 169.7, 169.5, 165.5, 165.0, 164.9, 137.8, 134.3, 131.8, 130.3, 129.7, 129.4, 129.3 (2), 129.2, 129.1, 129.0, 128.9, 100.4, 99.6, 84.3, 74.7, 72.9, 72.1, 70.7, 70.1, 69.3, 61.3, 21.1, 20.9, 20.9, 20.8 (2), 20.7; HRMS (ESI) *m/z* calcd for C<sub>60</sub>H<sub>64</sub>NaO<sub>25</sub>S [M + Na]<sup>+</sup> 1239.3350, found 1239.3357.

NIS (2.08 g, 9.25 mmol, 2.50 equiv) and TFA (464 mg, 4.07 mmol, 1.10 equiv) were added to a solution of **17wd** (4.50 g, 3.70 mmol, 1.00 equiv) in a mixture of DCM/H<sub>2</sub>O (44.0 mL, 10:1 v/v) at 0 °C. The reaction was allowed to stir at rt for 2 h and quenched with Et<sub>3</sub>N. The mixture was washed with 20% (w/w) aqueous Na<sub>2</sub>S<sub>2</sub>O<sub>3</sub> (30 mL) and saturated aqueous NaHCO<sub>3</sub> (30.0 mL). The organic layer was separated, and the aqueous layer was reextracted with DCM (2 × 30.0 mL). The organic layer was dried over anhydrous Na<sub>2</sub>SO<sub>4</sub>, concentrated, and purified by short column on SiO<sub>2</sub> (Petroleum ether: EtOAc = 1:1) to give the hemiacetal (3.46 g, 84%). The resulted hemiacetal (3.33 g, 3.00 mmol, 1.00 equiv) was treated with trichloroacetonitrile (1.30 g, 9.00 mmol, 4.00 equiv) in anhydrous DCM (20.0 mL) in the presence of DBU (91.2 mg, 0.600 mmol, 0.200 equiv). After stirring at rt for 2 h, the reaction mixture was concentrated and purified by short column on SiO<sub>2</sub> (Petroleum ether: EtOAc = 1:1) to afford trichloroacetimidate glycosyl donor **17we** as a white foam. Freshly activated 5Å MS (4.00 g), the above glycosyl donor **17we**, ((2*R*,3*R*,4*S*,5*S*,6*R*)-3,4,5-tris(benzyloxy)-6-(*p*-tolylthio)tetrahydro-2H-pyran-2-yl)methanol<sup>13</sup> **17wf** (1.67 g, 3.00 mmol, 1.00 equiv) and anhydrous DCM (30.0 mL) were successively added into a flame dried glassware. The reaction mixture was cooled to -20 °C and TMSOTf (66.6 mg, 0.300 mmol, 0.100 equiv) was added. After stirring at this temperature for 2 h, the resulting mixture was filtered through a pad of silica, concentrated and purified by column chromatography on SiO<sub>2</sub> (Petroleum ether: EtOAc = 1:1) to afford **17wg** (3.00 g, 61%) as a white foam: <sup>1</sup>H NMR (400 MHz,

CD<sub>3</sub>CN)  $\delta$  7.91 – 7.89 (m, 2H), 7.82 – 7.79 (m, 1.82H), 7.75 – 7.71 (m, 2.18H), 7.62 – 7.58 (m, 1H), 7.52 – 7.43 (m, 4H), 7.38 – 7.24 (m, 18H), 7.20 – 7.18 (m, 2H), 7.13 – 7.07 (m, 2H), 5.82 – 5.76 (m, 1H), 5.57 (d,  $J$  = 1.7 Hz, 0.91H), 5.45 – 5.34 (m, 2.09H), 5.30 – 5.29 (m, 1H), 5.12 – 5.08 (m, 1H), 5.03 (dd,  $J$  = 10.5, 3.6 Hz, 1H), 4.96 – 4.89 (m, 2H), 4.81 (dd,  $J$  = 9.9, 8.0 Hz, 1H), 4.74 (d,  $J$  = 2.3 Hz, 0.09H), 4.69 (d,  $J$  = 12.0 Hz, 1H), 4.61 – 4.52 (m, 4H), 4.47 (d,  $J$  = 11.8 Hz, 1H), 4.42 – 4.33 (m, 2H), 4.28 (d,  $J$  = 10.8 Hz, 0.91H), 4.25 – 4.24 (m, 0.09H), 4.12 – 4.02 (m, 7H), 4.01 – 3.96 (m, 2H), 3.86 (dd,  $J$  = 10.7, 3.5 Hz, 1H), 3.82 – 3.76 (m, 1.92H), 3.72 – 3.61 (m, 3H), 3.42 (dd,  $J$  = 9.1, 4.3 Hz, 0.09H), 2.34 (s, 2.73H), 2.30 (s, 0.27H), 2.07 (s, 3H), 2.01 – 1.97 (m, 15.27H), 1.90 (s, 2.73H); <sup>13</sup>C NMR (101 MHz, CD<sub>3</sub>CN)  $\delta$  171.3, 171.1, 170.7(2), 170.5, 170.3, 166.3, 165.9, 165.8, 139.5, 139.4(2), 138.9, 134.6, 134.5, 134.4, 133.0, 131.3, 131.1, 130.9, 130.4, 130.3, 130.1, 130.0, 129.8, 129.6, 129.5(2), 129.3, 129.2, 129.1, 128.8, 128.7, 128.6, 128.5(2), 128.4, 101.5, 101.4, 101.2, 87.0, 80.6, 77.1, 75.4, 75.0, 74.6, 73.7, 73.4, 73.2, 73.1, 72.9, 72.7, 72.1, 72.0, 71.6, 71.4, 70.1, 69.9, 69.2, 68.6, 68.1, 62.9, 62.0, 21.1(3), 21.0, 20.9, 20.8, 20.7; HRMS (ESI)  $m/z$  calcd for C<sub>87</sub>H<sub>92</sub>NaO<sub>30</sub>S [M + Na]<sup>+</sup> 1671.5286, found 1671.5292.

NIS (956 mg, 4.25 mmol, 2.50 equiv) and TFA (213 mg, 1.87 mmol, 1.10 equiv) were added to a solution of **17wg** (2.96 g, 1.70 mmol, 1.00 equiv) in a mixture of DCM/H<sub>2</sub>O (33.0 mL, 10:1 v/v) at 0 °C. The reaction was allowed to stir for 2 h and quenched with Et<sub>3</sub>N. The mixture was washed with 20% (w/w) aqueous Na<sub>2</sub>S<sub>2</sub>O<sub>3</sub> (20.0 mL) and saturated aqueous NaHCO<sub>3</sub> (20.0 mL). The organic layer was separated, and the aqueous layer was reextracted with DCM (2 × 30.0 mL). The organic phase was dried over anhydrous Na<sub>2</sub>SO<sub>4</sub>, concentrated, and purified by short column on SiO<sub>2</sub> (Petroleum ether: EtOAc = 1:1) to afford the hemiacetal (1.80 g, 72%). According to the general protocol D, 3,5-bis(ethoxycarbonyl)-2,6-dimethyl-1,4-dihydropyridine-4-carboxylic acid<sup>1</sup> **S1** (326 mg, 1.10 mmol, 1.10 equiv), DIC (164 mg, 1.30 mmol, 1.30 equiv) and DMAP (36.6 mg, 0.300 mmol, 0.200 equiv) were added to a solution of the above hemiacetal (1.50 g, 1.00 mmol, 1.00 equiv) in DCM (15.0 mL) at rt. After stirring for 12 h, the reaction mixture was concentrated, and purified by column chromatography on SiO<sub>2</sub> (Hexane: Toluene: THF = 3:1:1) to afford the corresponding trisaccharide ester **17w** (605mg,  $\alpha$  and  $\beta$  mixture, 33% yield) as a white foam and recovered the hemiacetal material (950 mg, 62% yield): <sup>1</sup>H NMR (400 MHz, CDCl<sub>3</sub>)  $\delta$  7.90 – 7.90 (m, 0.16H), 7.89 – 7.88 (m, 0.16H), 7.86 – 7.78 (m, 5.16H), 7.56 – 7.44 (m, 5.32H), 7.41 – 7.22 (m, 15.16H), 7.20 – 7.16 (m, 3.52H), 7.13 – 7.08 (m, 0.32H), 6.83 – 6.81 (m, 0.16H), 5.88 (t,  $J$  = 9.7, 9.7 Hz, 5.88H), 5.68 (t,  $J$  = 9.8, 9.8 Hz, 0.84H), 5.58 (dd,  $J$  = 10.0, 8.0 Hz, 0.16H), 5.46 (s, 1H), 5.44 – 5.41 (m, 1.16H), 5.38 (s, 0.16H), 5.35 – 5.31 (m, 1H), 5.26 (s, 0.84H), 5.24 – 5.23 (m, 0.16H), 5.21 – 5.15 (m, 1H), 5.12 – 5.07 (m, 1.68H), 4.95 – 4.76 (m, 4H), 4.68 – 4.61 (m, 1.84H), 4.54 (d,  $J$  = 2.9 Hz, 0.16H), 4.51 – 4.43 (m, 2H), 4.41 – 4.34 (m, 1.68H), 4.33 – 4.31 (m, 1H), 4.30 (d,  $J$  = 2.1 Hz, 0.84H), 4.28 – 4.25 (m, 1H), 4.24 – 4.23 (m, 0.32H), 4.21 (d,  $J$  = 3.5 Hz, 0.16H), 4.19 – 4.14 (m, 0.84H), 4.12 – 3.96 (m, 6.64H), 3.93 – 3.88 (m, 1H), 3.86 – 3.82 (m, 1H), 3.78 – 3.70 (m, 1.84H), 3.64 – 3.58 (m, 1.68H), 3.52 – 3.49 (m, 0.16H), 3.42 – 3.37 (m, 1.68H), 2.63 (s, 2.52H), 2.16 (s, 2.52H), 2.12 (s, 33H), 2.07 – 2.01 (m, 12.96H), 1.97 – 1.95 (m, 2.52H), 1.36 – 1.25 (m, 6H); <sup>13</sup>C NMR (101 MHz, CDCl<sub>3</sub>)  $\delta$  172.1, 170.6, 170.5, 170.3, 170.2, 170.1, 169.7, 169.2, 167.3, 167.3, 167.0, 165.1, 147.0, 146.3, 138.6, 138.1, 137.9, 133.9, 133.8, 133.6, 130.0, 129.8, 129.8, 128.9, 128.8, 128.7, 128.6, 128.5, 128.4, 128.4, 128.3, 128.0, 127.8, 127.7, 127.7, 101.2, 101.1, 100.7, 98.8, 97.7, 94.7, 81.6, 78.6, 76.4, 75.3, 74.3, 74.1, 74.0, 73.9, 73.2, 72.9, 72.7, 71.5, 71.4, 71.1, 70.8, 69.7, 69.2, 66.7, 62.3, 60.9, 60.5, 60.3, 39.9, 29.8, 21.0, 20.9, 20.8, 20.8, 20.7, 19.7, 18.8, 14.7, 14.6. HRMS (ESI)  $m/z$  calcd for C<sub>94</sub>H<sub>103</sub>NNaO<sub>36</sub> [M + Na]<sup>+</sup> 1844.6152, found 1844.6158.

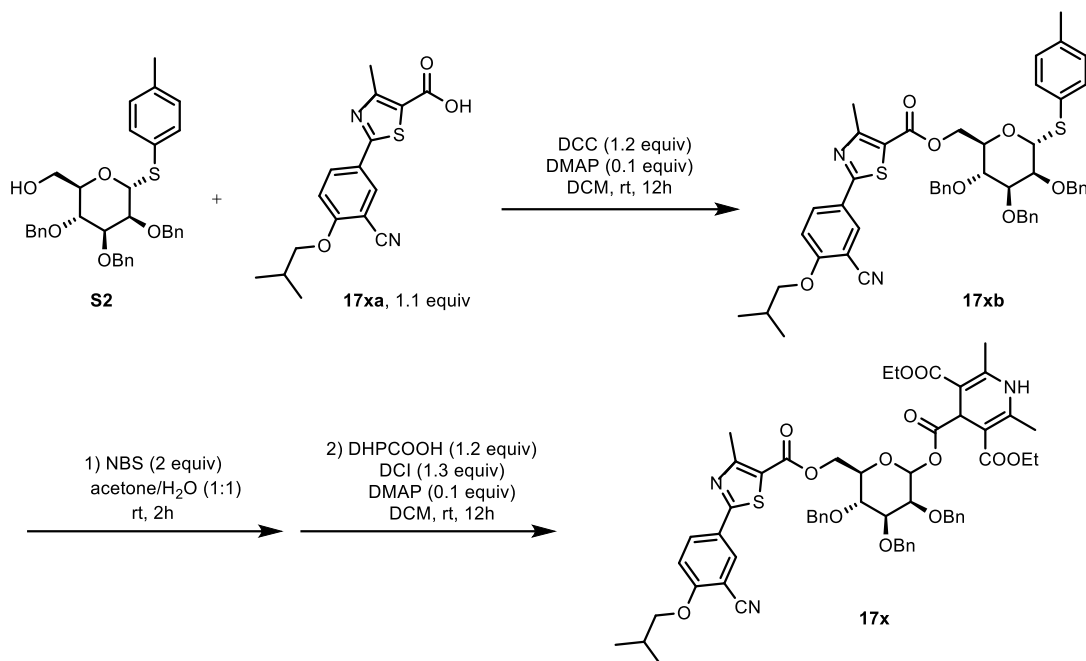

**3,5-Diethyl 4-((2*S*,3*S*,4*S*,5*R*,6*R*)-3,4,5-tris(benzyloxy)-6-(((2-(3-cyano-4-isobutoxyphenyl)-4-methylthiazole-5-carbonyl)oxy)methyl)tetrahydro-2*H*-pyran-2-yl) 2,6-dimethyl-1,4-dihydropyridine-3,4,5-tricarboxylate (17x).** To the solution of ((2*R*,3*R*,4*S*,5*S*)-3,4,5-tris(benzyloxy)-6-(*p*-tolylthio)tetrahydro-2*H*-pyran-2-yl) methanol<sup>13</sup> **S2** (3.30 g, 6.00 mmol, 1.00 equiv) in anhydrous DCM (20.0 mL), 2-(3-cyano-4-isobutoxyphenyl)-4-methylthiazole-5-carboxylic acid **17xa** (2.10 g, 6.60 mmol, 1.10 equiv), DCC (1.48 g, 7.20 mmol, 1.20 equiv) and DMAP (73.2 mg, 0.60 mmol, 0.100 equiv) were added. After stirring at rt for 12 h, the reaction was completed by TLC. The reaction mixture was filtered, concentrated, and purified by short column on SiO<sub>2</sub> (Petroleum ether: EtOAc = 3:1) to afford **17xb** (4.82 g, 92 %) as a white foam. A mixture of compounds **17xb** (4.80 g, 5.50 mmol, 1.00 equiv), NBS (1.96 g, 11.0 mmol, 2.00 equiv) and acetone–H<sub>2</sub>O (50.0 mL, 1:1 v/v) was stirred at rt for 2 h. NBS (979 mg, 5.50 mmol, 1.00 equiv) was added and the solution was stirred for another 1 h. The reaction mixture was concentrated, extracted with DCM, dried over anhydrous Na<sub>2</sub>SO<sub>4</sub>, purified by short column on SiO<sub>2</sub> (Petroleum ether: EtOAc = 2:1) to give the hemiacetal (2.87 g, 70%). According to the general protocol D, 3,5-bis(ethoxycarbonyl)-2,6-dimethyl-1,4-dihydropyridine-4-carboxylic acid<sup>1</sup> **S1** (713 mg, 2.40 mmol, 1.20 equiv), DIC (328 mg, 2.60 mmol, 1.30 equiv) and DMAP (24.4 mg, 0.200 mmol, 0.100 equiv) were added to a solution of the above hemiacetal (1.50 g, 2.00 mmol, 1.00 equiv) in anhydrous DCM (20.0 mL) at rt. After stirring for 12 h, the reaction mixture was concentrated and purified by column chromatography on SiO<sub>2</sub> (Toluene: EtOAc = 3:1) to afford **17x** (1.10 g, 52%,  $\alpha$  and  $\beta$  mixture) as a white foam: <sup>1</sup>H NMR (400 MHz, CDCl<sub>3</sub>)  $\delta$  8.10 (d, *J* = 2.3 Hz, 1H), 7.97 (dd, *J* = 8.9, 2.3 Hz, 1H), 7.50 – 7.48 (m, 2H), 7.33 – 7.29 (m, 6H), 7.28 – 7.25 (m, 5H), 7.24 – 7.18 (m, 2H), 6.97 (d, *J* = 8.9 Hz, 1H), 6.09 (s, 1H), 5.62 (s, 1H), 4.97 (s, 1H), 4.92 (dd, *J* = 11.4, 6.7 Hz, 2H), 4.69 (d, *J* = 11.9 Hz, 1H), 4.62 – 4.59 (m, 2H), 4.53 (d, *J* = 11.9 Hz, 2H), 4.41 (dd, *J* = 11.8, 4.0 Hz, 1H), 4.16 – 3.99 (m, 5H), 3.97 (d, *J* = 2.8 Hz, 1H), 3.90 (d, *J* = 6.5 Hz, 2H), 3.67 – 3.61 (m, 2H), 2.67 (s, 3H), 2.26 – 2.17 (m, 7H), 1.23 – 1.15 (m, 6H), 1.10 (d, *J* = 6.7 Hz, 6H); <sup>13</sup>C NMR (101 MHz, CDCl<sub>3</sub>)  $\delta$  172.1, 167.5, 167.0, 166.9, 162.5, 161.7, 161.4, 146.2, 146.1, 138.9, 137.9 (2), 132.8, 132.1, 128.5, 128.5, 128.3 (2), 128.2, 127.9 (2), 127.8, 127.7, 127.5, 126.0, 121.9, 115.5, 112.6, 102.9, 98.2, 98.1, 94.0, 81.7, 75.7, 75.1, 74.3, 74.1, 74.0, 73.4, 71.6, 63.7, 60.2, 60.2, 40.8, 28.2, 19.4, 19.3, 19.1, 17.6, 14.5, 14.4; HRMS (ESI) *m/z* calcd for C<sub>57</sub>H<sub>61</sub>N<sub>3</sub>NaO<sub>13</sub>S [M + Na]<sup>+</sup> 1050.3817, found 1050.3835.

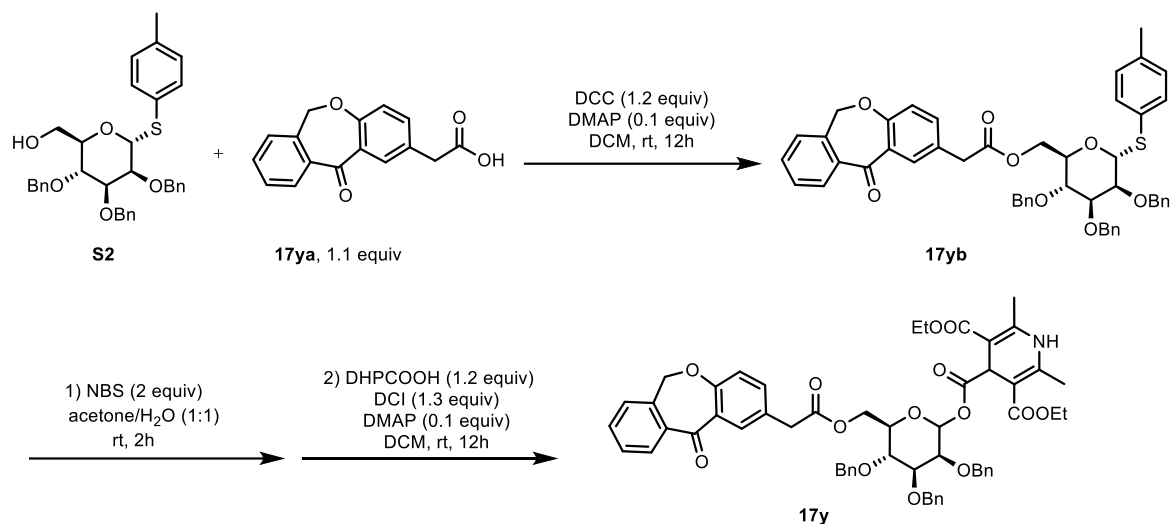

**3,5-Diethyl 4-((3*S*,4*S*,5*R*,6*R*)-3,4,5-tris(benzyloxy)-6-((2-(11-oxo-6,11-dihydrodibenzo[*b,e*]oxepin-2-yl)acetoxymethyl)tetrahydro-2*H*-pyran-2-yl) 2,6-dimethyl-1,4-dihydropyridine-3,4,5-tricarboxylate (17y).** To the solution of ((2*R*,3*R*,4*S*,5*S*)-3,4,5-tris(benzyloxy)-6-(*p*-tolylthio) tetrahydro-2*H*-pyran-2-yl) methanol<sup>13</sup> **S2** (3.83 g, 7.00 mmol, 1.00 equiv) in anhydrous DCM (20.0 mL), 2-(11-oxo-6,11-dihydrodibenzo[*b,e*]oxepin-2-yl)acetic acid **17ya** (2.10 g, 7.70 mmol, 1.10 equiv), DCC (1.80 g, 8.40 mmol, 1.20 equiv) and DMAP (85.4 mg, 0.700 mmol, 0.100 equiv) were added and the reaction was stirred under N<sub>2</sub> at rt. After stirring for 12 h, the reaction was filtered, concentrated, and purified by short column on SiO<sub>2</sub> (Petroleum ether: EtOAc = 3:1) to afford **17yb** (4.30 g, 76%) as a white foam. A mixture of compounds **17yb** (4.30 g, 5.30 mmol, 1.00 equiv), NBS (1.89 g, 10.6 mmol, 2.00 equiv) and acetone–H<sub>2</sub>O (40.0 mL, 1:1 v/v) was stirred at rt for 2 h. After removal the solvent, the resulting residue was poured onto DCM and extracted with DCM. The organic phase was dried over anhydrous Na<sub>2</sub>SO<sub>4</sub>, concentrated, and purified by short column on SiO<sub>2</sub> (Petroleum ether: EtOAc = 3:1) to give the hemiacetal (2.70 g, 89%). According to the general protocol D, 3,5-bis(ethoxycarbonyl)-2,6-dimethyl-1,4-dihydropyridine-4-carboxylic acid<sup>1</sup> **S1** (713 mg, 2.40 mmol, 1.20 equiv), DIC (328 mg, 2.60 mmol, 1.3 equiv) and DMAP (24.4 mg, 0.200 mmol, 0.100 equiv) were added to a solution of the hemiacetal (1.40 g, 2.00 mmol, 1.00 equiv) in DCM (20.0 mL) at rt. After stirring for 12 h, the reaction mixture was concentrated and purified by column chromatography on SiO<sub>2</sub> (Toluene: EtOAc = 3:1) to afford **17y** (700 mg, 51%,  $\alpha$  and  $\beta$  mixture) as a white foam: <sup>1</sup>H NMR (400 MHz, CDCl<sub>3</sub>)  $\delta$  8.07 (d, *J* = 2.3 Hz, 1H), 7.84 (dd, *J* = 7.8, 1.4 Hz, 1H), 7.59 – 7.53 (m, 1H), 7.50 – 7.43 (m, 3H), 7.39 (dd, *J* = 8.5, 2.4 Hz, 1H), 7.36 – 7.27 (m, 9H), 7.26 – 7.24 (m, 3H), 7.20 – 7.17 (m, 2H), 6.99 (d, *J* = 8.4 Hz, 1H), 6.44 (s, 1H), 5.59 (d, *J* = 0.9 Hz, 1H), 5.13 (s, 2H), 5.03 (s, 1H), 4.90 (d, *J* = 11.9 Hz, 1H), 4.80 (d, *J* = 10.9 Hz, 1H), 4.64 (d, *J* = 12.0 Hz, 1H), 4.52 – 4.38 (m, 4H), 4.26 (dd, *J* = 11.8, 5.3 Hz, 1H), 4.21 – 4.08 (m, 4H), 3.94 (dd, *J* = 2.9, 0.9 Hz, 1H), 3.85 – 3.81 (m, 1H), 3.64 – 3.54 (m, 4H), 2.31 (s, 3H), 2.28 (s, 3H), 1.28 – 1.21 (m, 6H); <sup>13</sup>C NMR (101 MHz, CDCl<sub>3</sub>)  $\delta$  191.1, 172.0, 171.2, 167.1 (2), 160.7, 146.4, 140.4, 138.9, 138.0 (2), 137.0, 135.7, 133.0, 132.5, 129.6, 129.4, 128.5 (2), 128.3, 128.2, 128.0 (2), 127.9, 127.8, 127.7, 127.6, 125.1, 121.3, 98.3, 98.1, 93.9, 81.4, 75.1, 74.3, 74.0, 73.9 (2), 73.7, 71.5, 63.7, 60.3 (2), 40.7, 40.0, 19.4 (2), 14.5 (2); HRMS (ESI) *m/z* calcd for C<sub>57</sub>H<sub>57</sub>NNaO<sub>14</sub> [M + Na]<sup>+</sup> 1002.3671, found 1002.3678.



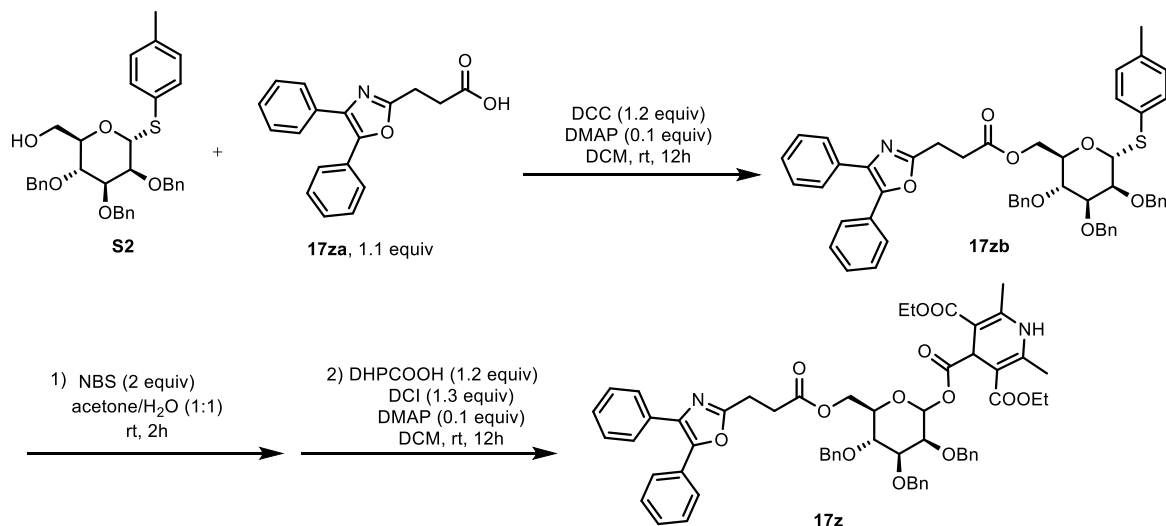

**3,5-Diethyl 4-((2*S*,3*S*,4*S*,5*R*,6*R*)-3,4,5-tris(benzyloxy)-6-(((3-(4,5-diphenyloxazol-2-yl)propanoyl)oxy)methyl)tetrahydro-2*H*-pyran-2-yl) 2,6-dimethyl-1,4-dihydropyridine-3,4,5-tricarboxylate (17z).**

To the solution of ((2*R*,3*R*,4*S*,5*S*)-3,4,5-tris(benzyloxy)-6-(*p*-tolylthio) tetrahydro-2*H*-pyran-2-yl) methanol<sup>13</sup> **S2** (3.30 g, 6.00 mmol, 1.00 equiv) in anhydrous DCM (20.0 mL), 3-(4,5-diphenyloxazol-2-yl) propanoic acid **17za** (1.94 g, 6.60 mmol, 1.10 equiv), DCC (1.48 g, 7.20 mmol, 1.20 equiv) and DMAP (73.2 mg, 0.600 mmol, 0.100 equiv) was added at rt. After stirring for 12 h, the reaction was filtered and concentrated under reduced pressure. The resulting residue was purified by short column on SiO<sub>2</sub> (Petroleum ether: EtOAc = 3:1) to afford **17zb** (4.21 g, 85% yield) as a light-yellow foam. A mixture of compounds **17zb** (4.20 g, 5.00 mmol, 1.00 equiv), NBS (1.78 g, 10.0 mmol, 2.00 equiv) and acetone/H<sub>2</sub>O (50.0 mL, 1:1 v/v) was stirred at rt for 2 h. NBS (890 mg, 5.00 mmol, 1.00 equiv) was added and the solution was stirred for another 1 h. After the removal of the volatile solvents, the resulting residue was poured onto DCM and extracted with DCM. The organic layer was dried over anhydrous Na<sub>2</sub>SO<sub>4</sub>, concentrated, and purified by short column on SiO<sub>2</sub> (Petroleum ether: EtOAc = 3:1) to give the hemiacetal (2.00 g, 55%). According to the general protocol D, 3,5-bis(ethoxycarbonyl)-2,6-dimethyl-1,4-dihydropyridine-4-carboxylic acid<sup>1</sup> **S1** (980 mg, 3.30 mmol, 1.20 equiv), DIC (454 mg, 3.60 mmol, 1.30 equiv) and DMAP (36.6 mg, 0.275 mmol, 0.100 equiv) were added to a solution of the hemiacetal (2.00 g, 2.75 mmol, 1.00 equiv) in DCM (20.0 mL) at rt. After stirring for 12h, the reaction mixture was concentrated and purified by column chromatography on SiO<sub>2</sub> (Toluene: EtOAc = 3:1) to afford **17z** (1.20 g, 44%,  $\alpha$  and  $\beta$  mixture) as a light-yellow foam: <sup>1</sup>H NMR (400 MHz, CDCl<sub>3</sub>)  $\delta$  7.61 (dd,  $J$  = 7.9, 1.7 Hz, 2H), 7.57 (dd,  $J$  = 8.0, 1.8 Hz, 2H), 7.49 – 7.45 (m, 2H), 7.38 – 7.28 (m, 15H), 7.26 (s, 2H), 7.25 – 7.20 (m, 3H), 6.81 (s, 1H), 5.60 (d,  $J$  = 0.9 Hz, 1H), 5.02 (s, 1H), 4.89 (dd,  $J$  = 11.4, 9.7 Hz, 2H), 4.67 (d,  $J$  = 12.0 Hz, 1H), 4.56 – 4.42 (m, 4H), 4.32 – 4.28 (m, 1H), 4.20 – 4.08 (m, 4H), 3.95 – 3.93 (m, 1H), 3.88 (t,  $J$  = 9.1, 9.1 Hz, 1H), 3.61 – 3.56 (m, 2H), 3.16 – 3.12 (m, 2H), 2.89 – 2.85 (m, 2H), 2.24 – 2.23 (m, 6H), 1.28 – 1.21 (m, 7H); <sup>13</sup>C NMR (101 MHz, CDCl<sub>3</sub>)  $\delta$  172.0, 171.6, 167.1, 167.0, 161.9, 146.6, 146.5, 145.6, 138.8, 138.0, 135.0, 132.4, 128.9, 128.7 (2), 128.6, 128.5 (2), 128.3, 128.2, 128.0, 127.9, 127.8, 127.7, 127.5, 126.5, 98.1, 97.8, 93.8, 81.4, 75.1, 74.1, 73.9, 73.7, 73.7, 71.5, 63.4, 60.2, 60.2, 40.5, 31.2, 23.6, 19.2, 19.1, 14.5, 14.4; HRMS (ESI)  $m/z$  calcd for C<sub>59</sub>H<sub>60</sub>N<sub>2</sub>NaO<sub>13</sub> [M + Na]<sup>+</sup> 1027.3988, found 1027.3990.

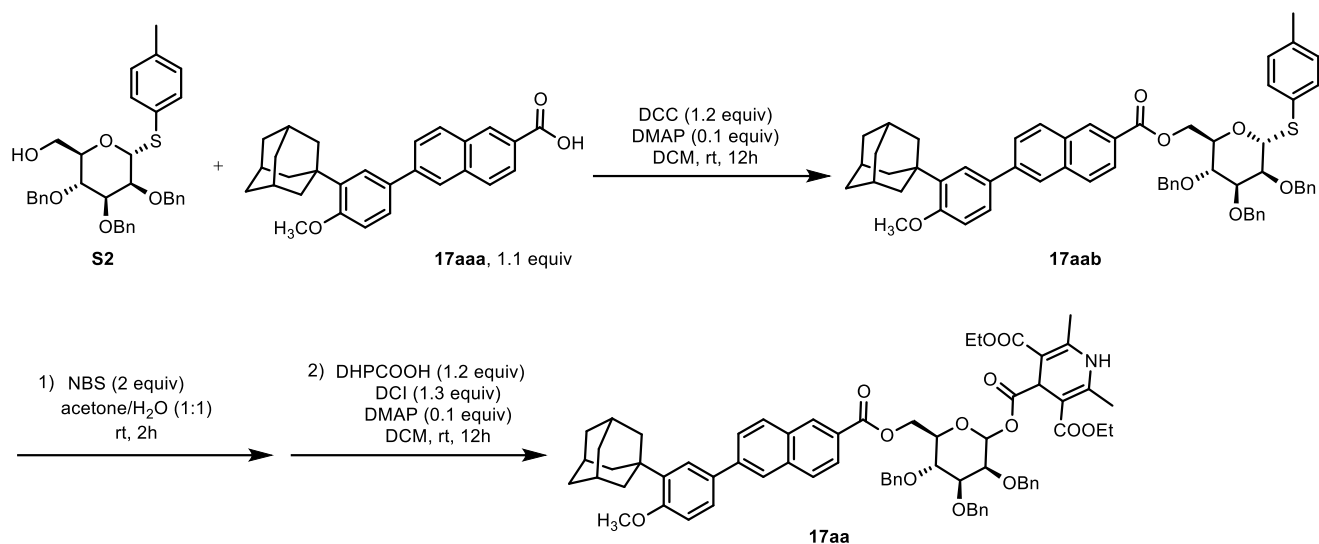

**4-((2*S*,3*S*,4*S*,5*R*,6*R*)-6-(((6-(3-((3*r*,5*r*,7*r*)-Adamantan-1-yl)-4-methoxyphenyl)-2-naphthoyl)oxy)methyl)-3,4,5-tris(benzyloxy)tetrahydro-2*H*-pyran-2-yl) 3,5-diethyl 2,6-dimethyl-1,4-dihydropyridine-3,4,5-tricarboxylate (**17aa**).** To the solution of ((2*R*,3*R*,4*S*,5*S*)-3,4,5-tris(benzyloxy)-6-(*p*-tolylthio) tetrahydro-2*H*-pyran-2-yl) methanol<sup>13</sup> **S2** (2.74 g, 5.00 mmol, 1.00 equiv) was dissolved in anhydrous DCM (20.0 mL), 6-(3-((3*r*,5*r*,7*r*)-adamantan-1-yl)-4-methoxyphenyl)-2-naphthoic acid **17aaa** (1.61 g, 5.50 mmol, 1.10 equiv), DCC (1.24 g, 6.00 mmol, 1.20 equiv) and DMAP (61.0 mg, 0.500 mmol, 0.100 equiv) were added and the reaction at rt. After stirring for 12 h, the reaction mixture was filtered, concentrated, and purified by short column on SiO<sub>2</sub> (Petroleum ether: EtOAc = 3:1) to afford **17aab** (3.40 g, 82%) as a white foam. A mixture of compounds **17aab** (3.40 g, 4.00 mmol, 1.00 equiv), NBS (1.41 g, 8.00 mmol, 2.00 equiv) and acetone/H<sub>2</sub>O (40.0 mL, 1:1 v/v) was stirred at rt for 2 h. NBS (712 mg, 4.00 mmol, 1.00 equiv) was added and the solution was stirred for another 1 h. After the removal of the volatile solvents, the resulting residue was poured onto DCM and extracted with DCM. The organic layer was dried over anhydrous Na<sub>2</sub>SO<sub>4</sub>, concentrated, and purified by short column on SiO<sub>2</sub> (Petroleum ether: EtOAc = 3:1) to give the hemiacetal (2.16 g, 75%). According to the general protocol D, 3,5-bis(ethoxycarbonyl)-2,6-dimethyl-1,4-dihydropyridine-4-carboxylic acid<sup>1</sup> **S1** (1.10 g, 3.60 mmol, 1.20 equiv), DIC (492 mg, 3.90 mmol, 1.30 equiv) and DMAP (73.2 mg, 0.300 mmol, 0.100 equiv) were added to a solution of the hemiacetal (2.16 g, 3.00 mmol, 1.00 equiv) in DCM (20.0 mL) at rt. After stirring for 12h, the reaction mixture was concentrated and purified by column chromatography on SiO<sub>2</sub> (Toluene: EtOAc = 3:1) to afford **17aa** (1.60 g,  $\alpha$  and  $\beta$  mixture, 53%) as a yellow foam: <sup>1</sup>H NMR (400 MHz, CDCl<sub>3</sub>)  $\delta$  8.53 (d, *J* = 1.7 Hz, 0.88H), 8.50 (d, *J* = 1.7 Hz, 0.12H), 8.35 (d, *J* = 9.0 Hz, 0.12H), 8.09 (dd, *J* = 8.9, 1.7 Hz, 0.12H), 8.02 – 7.99 (m, 1.76H), 7.82 – 7.74 (m, 2.64H), 7.68 (d, *J* = 8.4 Hz, 0.12H), 7.64 (d, *J* = 2.4 Hz, 0.88H), 7.59 – 7.56 (m, 3H), 7.48 (d, *J* = 8.4 Hz, 0.12H), 7.42 (d, *J* = 2.3 Hz, 0.12H), 7.37 – 7.28 (m, 10.76H), 7.24 – 7.16 (m, 2.24H), 7.03 – 6.99 (m, 1H), 6.24 – 6.23 (m, 1H), 5.71 (d, *J* = 2.5 Hz, 1H), 5.01 – 4.94 (m, 3H), 4.75 (d, *J* = 11.8 Hz, 1H), 4.68 – 4.55 (m, 5H), 4.21 – 4.11 (m, 3H), 4.10 – 3.97 (m, 3H), 3.93 – 3.92 (m, 3H), 3.79 – 3.71 (m, 2H), 2.23 – 2.15 (m, 15H), 1.87 – 1.81 (m, 6H), 1.24 – 1.20 (m, 3H), 1.13 (t, *J* = 7.1, 7.1 Hz, 3H); <sup>13</sup>C NMR (101 MHz, CDCl<sub>3</sub>)  $\delta$  172.3, 167.0, 166.9, 166.6, 159.0, 146.1, 146.0, 141.4, 139.1, 138.0, 137.9, 136.0, 132.7, 131.2 (2), 130.0, 128.6, 128.5, 128.4 (3), 128.2, 128.0, 127.9, 127.8 (2), 127.5, 126.8, 126.5, 126.1, 125.9, 125.8, 124.8, 112.2, 98.2 (2), 94.0, 81.6, 75.2, 74.4, 74.3, 74.1, 73.6, 71.8, 63.6, 60.3, 60.2, 55.3, 40.9, 40.7, 37.3, 37.2, 29.2, 19.5, 19.3, 14.5, 14.4; HRMS (ESI) *m/z* calcd for C<sub>69</sub>H<sub>73</sub>NNaO<sub>13</sub> [M + Na]<sup>+</sup> 1146.4974, found 1146.4975.

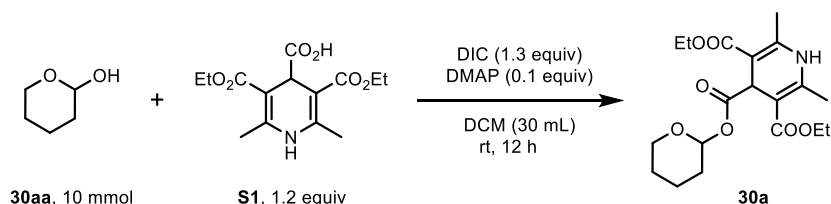

**3,5-Diethyl 4-(tetrahydro-2H-pyran-2-yl) 2,6-dimethyl-1,4-dihydropyridine-3,4,5-tricarboxylate (30a).** According to the general protocol D, 3,5-bis(ethoxycarbonyl)-2,6-dimethyl-1,4-dihydropyridine-4-carboxylic acid<sup>1</sup> **S1** (3.50 g, 12.0 mmol, 1.20 equiv), DIC (1.64 g, 13.0 mmol, 1.30 equiv) and DMAP (122 mg, 1.00 mmol, 0.100 equiv) were added to a solution of tetrahydro-2H-pyran-2-ol **30aa** (1.02 g, 10.0 mmol, 1.00 equiv) in DCM (30.0 mL) at rt and stirred for 12 h. After solvent removal *in vacuo*, the residue was purified by flash column chromatography on SiO<sub>2</sub> (Petroleum ether: EtOAc = 3:1) to afford **30a** (2.00 g, 52%) as a light-yellow solid: <sup>1</sup>H NMR (400 MHz, CDCl<sub>3</sub>) δ 6.48 (s, 1H), 5.94 (s, 1H), 4.92 (s, 1H), 4.23 – 4.14 (m, 4H), 3.79 – 3.72 (m, 1H), 3.63 – 3.58 (m, 1H), 2.27 (s, 6H), 1.78 – 1.59 (m, 5H), 1.55 – 1.51 (m, 1H), 1.30 – 1.26 (m, 6H); <sup>13</sup>C NMR (101 MHz, CDCl<sub>3</sub>) δ 172.9, 167.4, 146.1, 145.9, 98.3, 98.2, 92.6, 62.3, 60.1, 40.5, 29.1, 25.1, 19.1, 19.1, 18.0, 14.5; HRMS (ESI) *m/z* calcd for C<sub>19</sub>H<sub>27</sub>NNaO<sub>7</sub> [M + Na]<sup>+</sup> 404.1680, found 404.1678.

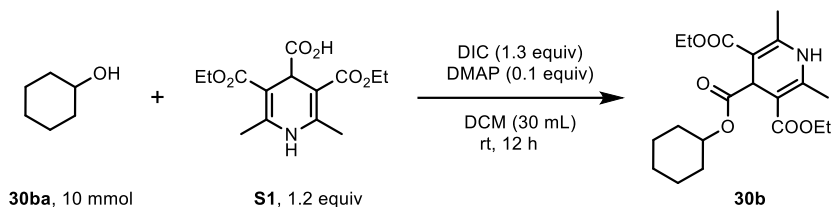

**4-Cyclohexyl 3,5-diethyl 2,6-dimethyl-1,4-dihydropyridine-3,4,5-tricarboxylate (30b).** According to the general protocol D, 3,5-bis(ethoxycarbonyl)-2,6-dimethyl-1,4-dihydropyridine-4-carboxylic acid<sup>1</sup> **S1** (3.50 g, 12.0 mmol, 1.20 equiv), DIC (1.64 g, 13.0 mmol, 1.300 equiv) and DMAP (122 mg, 1.0 mmol, 0.100 equiv) were added to a solution of cyclohexanol **30ba** (1.00 g, 10.0 mmol, 1.00 equiv) in DCM (30.0 mL) at rt and stirred for 12 h. After solvent removal *in vacuo*, the residue was purified by flash column chromatography on SiO<sub>2</sub> (Petroleum ether: EtOAc = 3:1) to afford **30b** (1.40 g, 37%) as a light-yellow solid: <sup>1</sup>H NMR (400 MHz, CDCl<sub>3</sub>) δ 6.77 (s, 1H), 4.79 (s, 1H), 4.70 – 4.64 (m, 1H), 4.19 – 4.11 (m, 4H), 2.23 (s, 6H), 1.73 – 1.61 (m, 4H), 1.47 – 1.34 (m, 3H), 1.33 – 1.22 (m, 9H); <sup>13</sup>C NMR (101 MHz, CDCl<sub>3</sub>) δ 174.1, 167.5, 145.9, 98.4, 72.8, 60.0, 40.8, 31.4, 25.5, 23.3, 18.9, 14.5. HRMS (ESI) *m/z* calcd for C<sub>20</sub>H<sub>29</sub>NNaO<sub>6</sub> [M + Na]<sup>+</sup> 402.1887, found 402.1884.

## 6. Detailed Experimental Procedures for Dehydroalanine Derivatives

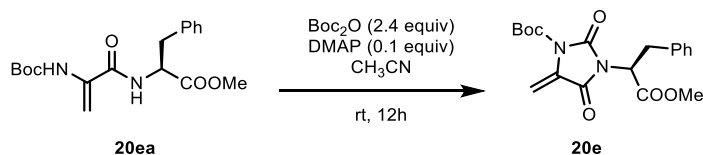

**tert-Butyl (S)-3-(1-methoxy-1-oxo-3-phenylpropan-2-yl)-5-methylene-2,4-dioxoimidazolidine-1-carboxylate (20e).** To a solution of methyl (2-((*tert*-butoxycarbonyl)amino)acryloyl)-*L*-phenylalaninate **20ea** (2.06 g, 5.90 mmol, 1.00 equiv) in CH<sub>3</sub>CN (50.0 mL), DMAP (72.0 mg, 0.590 mmol, 0.100 equiv) and Boc<sub>2</sub>O (1.55 g, 7.08 mmol, 2.40 equiv) were added and the solution was stirred under the air at rt for 12 h. After removal of volatiles *in vacuo*, the residue was diluted with EtOAc (20.0 mL), washed with 10% aqueous solution of citric acid (5.00 mL) and brine (10.0 mL), dried over Na<sub>2</sub>SO<sub>4</sub>, and filtered. The filtrate was

concentrated and purified by flash column chromatography on SiO<sub>2</sub> (Petroleum ether: EtOAc = 10: 1) to afford **20e** as colorless oil (1.11 g, 36%):  $[\alpha]_D^{25} = -91.3$  ( $c = 2.23$ , CHCl<sub>3</sub>); **<sup>1</sup>H NMR** (400 MHz, CDCl<sub>3</sub>)  $\delta$  7.32 – 7.11 (m, 5H), 5.95 (d,  $J = 1.1$  Hz, 1H), 5.77 (d,  $J = 1.1$  Hz, 1H), 5.06 (dd,  $J = 10.8, 5.8$  Hz, 1H), 3.78 (s, 3H), 3.61 – 3.43 (m, 2H), 1.57 (s, 9H); **<sup>13</sup>C NMR** (101 MHz, CDCl<sub>3</sub>)  $\delta$  168.4, 160.4, 149.5, 147.7, 136.2, 131.5, 128.8 (2), 127.1, 105.7, 85.6, 54.2, 53.1, 33.9, 28.0; **HRMS** (ESI)  $m/z$  calcd for C<sub>19</sub>H<sub>22</sub>O<sub>6</sub>N<sub>2</sub>Na [M + Na]<sup>+</sup> 397.1370, found 397.1370.

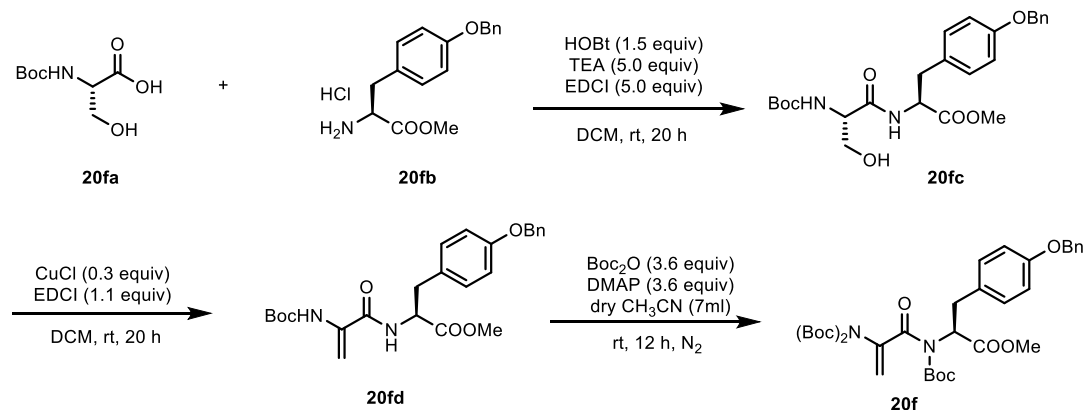

**Methyl (S)-3-(4-(benzyloxy)phenyl)-2-(2-(bis(tert-butoxycarbonyl)amino)-N-(tert-butoxycarbonyl)acrylamido)propanoate (20f).** *O*-Benzyl-*L*-tyrosine methyl ester hydrochloride **20fb** (3.86 mg, 12.0 mmol) and *N*-Boc-*L*-serine **20fa** (2.46 mg, 12.0 mmol) were dissolved in anhydrous DCM (60.0 mL). The reaction mixture was cooled to 0 °C before addition of HOBt hydrate (2.40 g, 18.0 mmol) and TEA (8.40 mL, 15.0 mmol). The reaction mixture was kept at 0 °C for 15 min before EDCI (2.88 g, 3.75 mmol) was added. The reaction mixture was warmed up to rt and stirred for 20 h. An additional DCM (60.0 mL) was added, and the organic layer was washed successively with citric acid (1.6 M, 100 mL), saturated NaHCO<sub>3</sub> (100 mL), and saturated NaCl (80.0 mL). The organic phase was dried over Na<sub>2</sub>SO<sub>4</sub> and concentrated under reduced pressure. The residue obtained was dissolved in anhydrous DCM (100 mL) under N<sub>2</sub>, copper(I) chloride (360 mg, 3.60 mmol) and EDCI (2.52 g, 13.2 mmol) were subsequently added, and the resultant suspension was stirred at rt for 20 h. The reaction mixture was filtered under Celite and washed with saturated NaCl (20 mL). The organic phase was dried over Na<sub>2</sub>SO<sub>4</sub>, concentrated and purified by short column on SiO<sub>2</sub> to afford **20fd**. To a solution of **20fd** (2.46 g, 5.50 mmol, 1.00 equiv.) and DMAP (2.42 g, 19.8 mmol, 3.60 equiv) in anhydrous CH<sub>3</sub>CN (15.0 mL), Boc<sub>2</sub>O (4.30 g, 19.8 mmol, 3.60 equiv) were added at rt. After stirring for 12 h, the reaction mixture was concentrated and purified by flash column chromatography on SiO<sub>2</sub> (Petroleum ether: EtOAc = 8: 1) to afford **20f** as a light yellow oil (0.300 g, 8.3%):  $[\alpha]_D^{25} = -31.3$  ( $c = 0.800$ , CHCl<sub>3</sub>); **<sup>1</sup>H NMR** (400 MHz, CDCl<sub>3</sub>)  $\delta$  7.43 – 7.29 (m, 5H), 7.19 – 7.14 (m, 2H), 6.91 – 6.85 (m, 2H), 5.41 (d,  $J = 1.4$  Hz, 1H), 5.25 (dd,  $J = 9.0, 6.2$  Hz, 1H), 5.19 (d,  $J = 1.4$  Hz, 1H), 5.02 (s, 2H), 3.72 (s, 3H), 3.44 (dd,  $J = 14.3, 6.2$  Hz, 1H), 3.14 (dd,  $J = 14.3, 9.0$  Hz, 1H), 1.47 (s, 18H), 1.42 (s, 9H); **<sup>13</sup>C NMR** (101 MHz, CDCl<sub>3</sub>)  $\delta$  170.7, 168.1, 157.6, 151.7, 151.0, 138.2, 137.2, 130.6, 130.4, 130.0, 128.6, 128.0, 127.5 (2), 118.5, 114.9, 84.7, 83.9, 83.4, 70.0, 59.0, 52.3, 35.2, 27.9, 27.8; **HRMS** (ESI)  $m/z$  calcd for C<sub>35</sub>H<sub>46</sub>O<sub>10</sub>N<sub>2</sub>Na [M + Na]<sup>+</sup> 677.3045, found 677.3050.

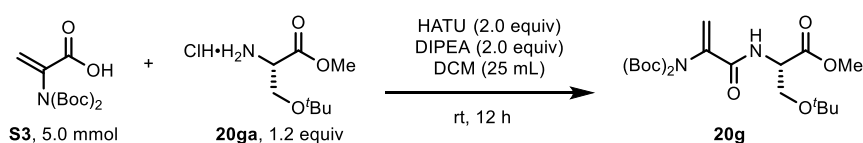

**2-(Di(*tert*-butoxycarbonyl)amino)acrylic-*L*-*O*-*tert*-Butyl-serine (20g).** According to the general protocol F, 2-(di(*tert*-butoxycarbonyl)amino)acrylic acid<sup>2</sup> **S3** (1.400 g, 5.00 mmol, 1.00 equiv) was dissolved in DCM (25.0 mL) and *O*-*tert*-butyl-*L*-serine methyl ester hydrochloride **20ga** (1.27 g, 6.00 mmol, 1.20 equiv), HATU (3.80 g, 10.0 mmol, 2.00 equiv), and DIPEA (1.75 mL, 10.0 mmol, 2.00 equiv) were subsequently added. After stirring at rt for 12 h, the mixture was diluted with DCM (10.0 mL) and washed with brine (20.0 mL). The organic layer was dried over Na<sub>2</sub>SO<sub>4</sub>, concentrated, and purified by column chromatography on SiO<sub>2</sub> (Petroleum ether: EtOAc = 3:1) to afford **20g** (358 mg, 16%) as a colorless oil:  $[\alpha]_D^{25} = +9.6$  (c = 1.50, CHCl<sub>3</sub>); <sup>1</sup>H NMR (300 MHz, CDCl<sub>3</sub>) δ 6.73 (d, *J* = 8.2 Hz, 1H), 6.19 (s, 1H), 5.47 (s, 1H), 4.81 – 4.65 (m, 1H), 3.86 – 3.77 (m, 1H), 3.71 (s, 3H), 3.59 – 3.48 (m, 1H), 1.45 (s, 18H), 1.10 (s, 9H); <sup>13</sup>C NMR (101 MHz, CDCl<sub>3</sub>) δ 170.4, 163.3, 150.5, 138.8, 121.4, 83.6, 73.6, 62.0, 53.3, 52.5, 52.4, 28.3, 27.9, 27.8, 27.4; HRMS (ESI) *m/z* calcd for C<sub>21</sub>H<sub>36</sub>O<sub>8</sub>N<sub>2</sub>Na [M + Na]<sup>+</sup> 467.2364, found 467.2363.

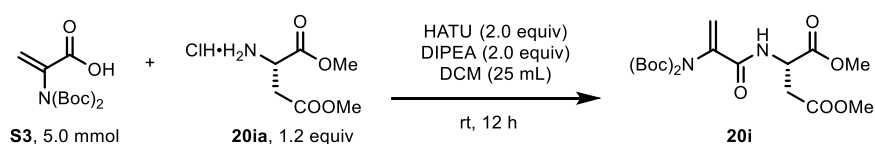

**2-(Di(*tert*-butoxycarbonyl)amino)acrylic-*L*-dimethyl-aspartate (20i).** According to the general protocol F, 2-(di(*tert*-butoxycarbonyl)amino)acrylic acid<sup>2</sup> **S3** (1.40 g, 5.00 mmol, 1.00 equiv) was dissolved in DCM (25.0 mL) and methyl *L*-aspartate hydrochloride **20ia** (1.27 g, 6.00 mmol, 1.20 equiv), HATU (3.80 g, 10.0 mmol, 2.00 equiv), and DIPEA (1.75 mL, 10.0 mmol, 2.00 equiv) were subsequently added. After stirring at rt for 12 h, the mixture was diluted with DCM (10.0 mL) and washed with brine (20.0 mL). The organic layer was dried over Na<sub>2</sub>SO<sub>4</sub>, concentrated, and purified by column chromatography on SiO<sub>2</sub> (Petroleum ether: EtOAc = 2:1) to afford **20i** (419 mg, 19%) as a colorless oil:  $[\alpha]_D^{25} = +23.8$  (c = 1.30, CHCl<sub>3</sub>); <sup>1</sup>H NMR (400 MHz, CDCl<sub>3</sub>) δ 6.95 (d, *J* = 7.9 Hz, 1H), 6.18 – 6.12 (m, 1H), 5.47 (s, 1H), 4.85 (dt, *J* = 8.3, 4.4 Hz, 1H), 3.72 (s, 3H), 3.63 (s, 3H), 3.03 (dd, *J* = 17.4, 4.3 Hz, 1H), 2.83 (dd, *J* = 17.4, 4.5 Hz, 1H), 1.42 (s, 18H); <sup>13</sup>C NMR (101 MHz, CDCl<sub>3</sub>) δ 171.3, 170.7, 169.0, 163.2, 150.5, 138.6, 121.5, 83.6, 52.9, 52.1, 48.8, 36.0, 28.3, 27.8, 27.7; HRMS (ESI) *m/z* calcd for C<sub>19</sub>H<sub>30</sub>O<sub>9</sub>N<sub>2</sub>Na [M + H]<sup>+</sup> 453.1844, found 453.1841.

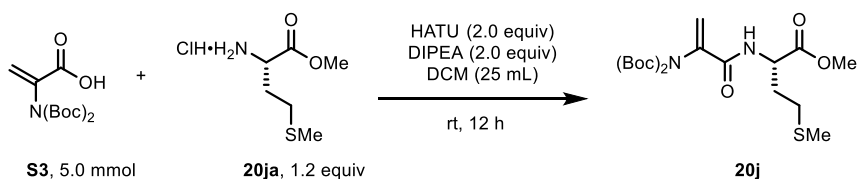

**2-(Di(*tert*-butoxycarbonyl)amino)acrylic-*L*-methionine (20j).** According to the general protocol F, 2-(di(*tert*-butoxycarbonyl)amino)acrylic acid<sup>2</sup> **S3** (1.40 g, 5.00 mmol, 1.00 equiv) was dissolved in DCM (25.0 mL) and *L*-Methionine methyl ester hydrochloride **20ja** (1.2 g, 6.0 mmol, 1.2 equiv), HATU (3.8 g, 10.0 mmol, 2.0 equiv), and DIPEA (1.75 mL, 10.0 mmol, 2.0 equiv) were subsequently added. After stirring at rt for 12 h, the mixture was diluted with DCM (10 mL) and washed with brine (20 mL). The organic layer was dried over Na<sub>2</sub>SO<sub>4</sub>, concentrated, and purified by column chromatography on SiO<sub>2</sub> (Petroleum ether: EtOAc = 3:1) to afford **20j** (770 mg, 36% yield) as a colorless oil:  $[\alpha]_D^{25} = +7.8$  (c = 1.46, CHCl<sub>3</sub>); <sup>1</sup>H NMR (400 MHz, CDCl<sub>3</sub>) δ 6.72 (d, *J* = 7.8 Hz, 1H), 6.17 (d, *J* = 0.7 Hz, 1H), 5.45 (d, *J* = 0.7 Hz, 1H), 4.75 – 4.69 (m, 1H), 3.71 (s, 3H), 2.46 (t, *J* = 7.4 Hz, 2H), 2.23 – 2.07 (m, 1H), 2.03 (s, 3H), 2.02 – 1.89 (m, 1H), 1.42 (s, 18H); <sup>13</sup>C NMR (101 MHz, CDCl<sub>3</sub>) δ 171.9, 163.2, 150.5, 138.6, 121.4, 83.7, 82.9, 52.6, 51.8, 31.5, 29.8, 28.3, 27.8, 27.7, 15.4; HRMS (ESI) *m/z* calcd for C<sub>19</sub>H<sub>32</sub>O<sub>7</sub>N<sub>2</sub>NaS [M + Na]<sup>+</sup> 455.1822, found 455.1816.

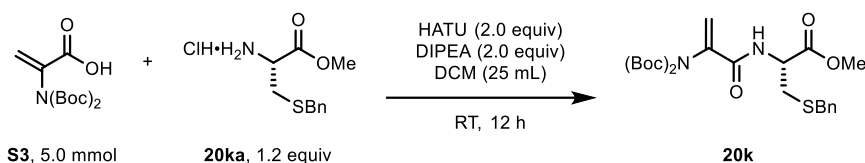

**2-(Di(*tert*-butoxycarbonyl)amino)acrylic-*L*-S-benzyl-cysteine (20k).** According to the general protocol F, 2-(di(*tert*-butoxycarbonyl)amino)acrylic acid<sup>2</sup> **S3** (1.40 g, 5.00 mmol, 1.00 equiv) was dissolved in DCM (25.0 mL) and benzyl-*L*-cysteine methyl ester hydrochloride **20ka** (1.57g, 6.00 mmol, 1.20 equiv), HATU (3.80 g, 10.0 mmol, 2.00 equiv) and DIPEA (1.75 mL, 10.0 mmol, 2.00 equiv) were subsequently added. After stirring at rt for 12 h, the mixture was diluted with DCM (10.0 mL) and washed with brine (20.0 mL). The organic layer was dried over Na<sub>2</sub>SO<sub>4</sub>, concentrated, and purified by column chromatography on SiO<sub>2</sub> (Petroleum ether: EtOAc = 4:1) to afford **20k** (1.35 g, 56%) as a colorless oil:  $[\alpha]_D^{25} = -0.9$  ( $c = 0.650$ , CHCl<sub>3</sub>); <sup>1</sup>H NMR (400 MHz, CDCl<sub>3</sub>)  $\delta$  7.36 – 7.18 (m, 5H), 6.74 (d,  $J = 7.6$  Hz, 1H), 6.20 (s, 1H), 5.50 (s, 1H), 4.92 – 4.77 (m, 1H), 3.72 (s, 3H), 3.68 (s, 2H), 2.92 (dd,  $J = 13.9, 5.1$  Hz, 1H), 2.82 (dd,  $J = 13.9, 5.7$  Hz, 1H), 1.45 (s, 18H); <sup>13</sup>C NMR (101 MHz, CDCl<sub>3</sub>)  $\delta$  170.9, 169.1, 169.0, 163.3, 150.6, 138.6, 137.5, 129.0, 128.6, 127.3, 121.6, 83.8, 82.9, 52.7, 52.0, 36.7, 36.5, 33.3, 33.1, 28.3, 27.9, 27.7 (2); HRMS (ESI)  $m/z$  calcd for C<sub>24</sub>H<sub>34</sub>O<sub>7</sub>N<sub>2</sub>NaS [M + Na]<sup>+</sup> 517.1979, found 527.1978.

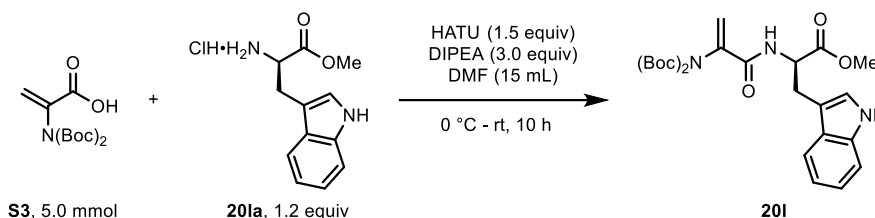

**Methyl (2-(di(*tert*-butoxycarbonyl)amino)acryloyl)-*D*-tryptophanate (20l).** According to the general protocol F, 2-(di(*tert*-butoxycarbonyl)amino)acrylic acid<sup>2</sup> **S3** (1.40 g, 5.00 mmol, 1.00 equiv) and HATU (2.85 g, 7.50 mmol, 1.50 equiv) were dissolved in anhydrous DMF (15.0 mL). The reaction was cooled to 0 °C before addition of DIPEA (2.60 mL, 15.0 mmol, 3.00 equiv). After stirring at 0 °C for 0.5 h, *D*-tryptophan methyl ester hydrochloride **20la** (1.53 g, 6.00 mmol, 1.20 equiv) was added and the reaction mixture was warmed up to rt. After stirring for 10 h, the reaction mixture was diluted with H<sub>2</sub>O and extracted with EtOAc (3x). The organic layer was dried over Na<sub>2</sub>SO<sub>4</sub>, concentrated, and purified by column chromatography on SiO<sub>2</sub> (Petroleum ether: EtOAc = 1:1) to afford **20l** (480 mg, 20%) as a white foam. Characterization data matched the literature report<sup>2</sup>.

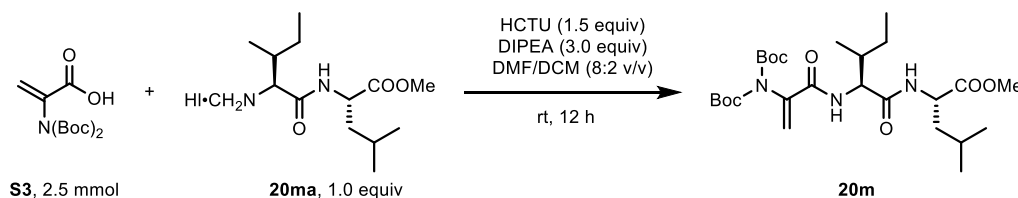

**Methyl (2-(bis(*tert*-butoxycarbonyl)amino)acryloyl)-*D*-isoleucylleucinate (20m).** According to the general protocol E, HCTU (1.55 g, 3.75 mmol, 1.50 equiv) and DIPEA (1.30 mL, 7.50 mmol, 3.00 equiv) was added to a solution of 2-(di(*tert*-butoxycarbonyl)amino)acrylic acid<sup>2</sup> **S3** (1.55 g, 2.50 mmol, 1.00 equiv) in anhydrous DMF/DCM (18.0 mL, 2:8 v/v). The solution was cooled to 0 °C and stirred under N<sub>2</sub> for 0.5h, then **20ma**<sup>15</sup> (0.610 g, 2.50 mmol, 1.00 equiv) was added. After stirring at rt for 12 hours, the reaction mixture was diluted

with H<sub>2</sub>O (25.0 mL) and EtOAc (50.0 mL), washed with 1.0 M HCl solution (2 × 30 mL), sat. aq. NaHCO<sub>3</sub> solution (2 × 30.0 mL) and brine (2 × 30.0 mL). The organic layer was dried over Na<sub>2</sub>SO<sub>4</sub>, filtered, concentrated, and purified by flash column chromatography on SiO<sub>2</sub> (Petroleum ether: EtOAc = 1.5:1) to afford **20m** (138 mg, 17%) as a white solid:  $[\alpha]_D^{25} = -18.2$  (c = 0.71, CHCl<sub>3</sub>); **<sup>1</sup>H NMR** (400 MHz, CDCl<sub>3</sub>) δ 6.72 (dd, *J* = 12.8, 8.8 Hz, 2H), 6.26 (s, 1H), 5.46 (s, 1H), 4.50 – 4.43 (m, 2H), 3.70 (s, 3H), 2.18 – 2.09 (m, 1H), 1.85 – 1.77 (m, 1H), 1.41 (s, 18H), 1.30 – 1.21 (m, 1H), 1.15 – 1.05 (m, 1H), 0.90 – 0.83 (m, 14H).; **<sup>13</sup>C NMR** (101 MHz, CDCl<sub>3</sub>) δ 172.2, 170.9, 170.8, 163.3, 150.7, 138.8, 121.8, 83.8, 67.9, 58.3, 58.0, 57.4, 57.3, 52.4, 52.3 (2), 37.8, 37.4, 31.1 (2), 28.3, 28.2, 27.9, 25.0, 19.1 (2), 18.0, 17.9, 15.5, 15.4, 11.4, 11.3; **HRMS** (ESI) *m/z* calcd for C<sub>26</sub>H<sub>45</sub>N<sub>3</sub>NaO<sub>8</sub> [M + Na]<sup>+</sup> 550.3099, found 550.3097.

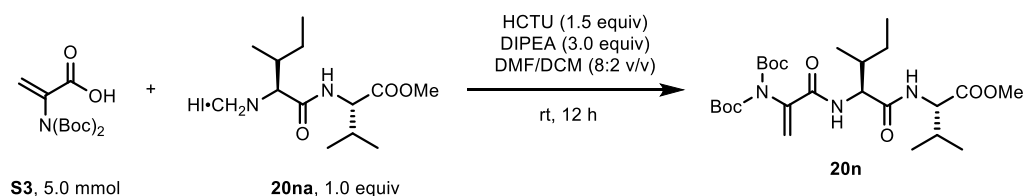

**Methyl (2-(bis(*tert*-butoxycarbonyl)amino)acryloyl)-D-isoleucylvalinate (20n).** According to the general protocol E, HCTU (3.10 g, 7.50 mmol, 1.50 equiv) and DIPEA (2.60 mL, 15.0 mmol, 3.00 equiv) was added to a solution of 2-(di(*tert*-butoxycarbonyl)amino)acrylic acid<sup>2</sup> **S3** (1.44 g, 5.00 mmol, 1.00 equiv) in anhydrous DMF/DCM (18.0 mL, 2:8 v/v). The solution was cooled to 0 °C and stirred under N<sub>2</sub> for 0.5 h, then **20na**<sup>16</sup> (1.925 g, 5.0 mmol, 1.0 equiv) was added. After stirring at rt for 12 h, the reaction mixture was diluted with H<sub>2</sub>O (25.0 mL) and EtOAc (50.0 mL), washed with 1.0 M HCl solution (2 × 30 mL), sat. aq. NaHCO<sub>3</sub> solution (2 × 30.0 mL) and brine (2 × 30.0 mL). The organic layer was dried over Na<sub>2</sub>SO<sub>4</sub>, filtered, concentrated, and purified by flash column chromatography on SiO<sub>2</sub> (Petroleum ether:EtOAc = 1.5:1) to afford **20n** (331 mg, 27%) as a white solid:  $[\alpha]_D^{25} = -25.7$  (c = 0.58, CHCl<sub>3</sub>); **<sup>1</sup>H NMR** (400 MHz, CDCl<sub>3</sub>) δ 6.64 (d, *J* = 8.7 Hz, 1H), 6.22 (s, 1H), 6.19 (d, *J* = 8.2 Hz, 1H), 5.49 (s, 1H), 4.61 – 4.56 (m, 1H), 4.36 (dd, *J* = 8.7, 6.9 Hz, 1H), 3.73 (s, 3H), 1.91 – 1.84 (m, 1H), 1.58 – 1.46 (m, 20H), 1.41 (d, *J* = 2.3 Hz, 1H), 0.95 – 0.89 (m, 12H); **<sup>13</sup>C NMR** (101 MHz, CDCl<sub>3</sub>) δ 173.1, 170.6, 163.4, 150.7, 138.9, 121.7, 83.9, 57.9, 52.5, 50.9, 41.5, 37.9, 27.9, 25.0, 24.9, 22.9, 22.0, 15.4, 11.4; **HRMS** (ESI) *m/z* calcd for C<sub>25</sub>H<sub>43</sub>N<sub>3</sub>NaO<sub>8</sub> [M + Na]<sup>+</sup> 536.2942, found 536.2943.

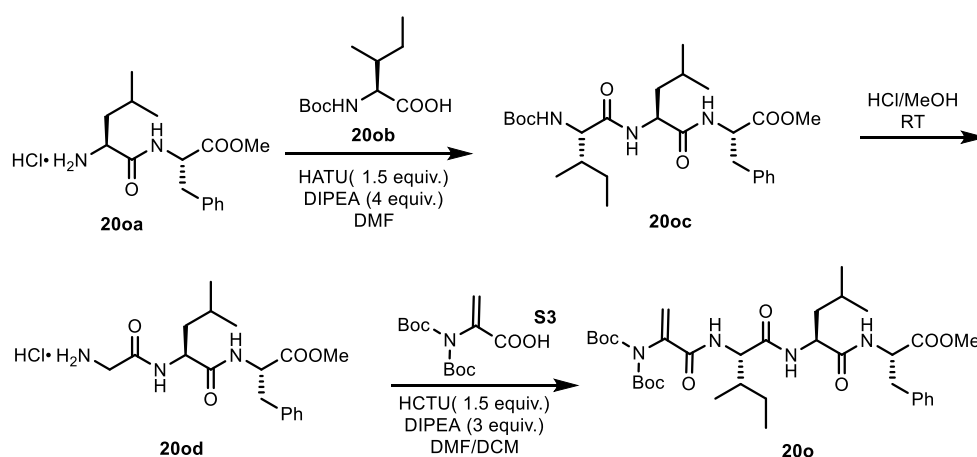

**Methyl (2-(bis(*tert*-butoxycarbonyl)amino)acryloyl)-L-alloisoleucyl-L-leucyl-L-phenylalaninate (20o).** **20oa** was prepared by following the previously reported procedure<sup>17</sup>. To a solution of **20oa** (1.4 g, 8mmol, 1.0 equiv), HATU (4.56 g, 12.0 mmol, 1.50 equiv) in anhydrous DMF (30.0 mL) and DIPEA (3.10 g, 24.0 mmol,



3.00 equiv) was added. After the mixture was stirred at 0 °C for 30 min. **20ob** (3.50 g, 8.80 mmol, 1.10 equiv) was added. The resulting mixture was warmed to rt and stirred for 12 h, after which time the reaction mixture was diluted with H<sub>2</sub>O (50.0 mL) and EtOAc (100.0 mL). The crude material was washed with 1 M HCl solution (2 × 50.0 mL), sat. aq. NaHCO<sub>3</sub> solution (2 × 50.0 mL) and brine (2 × 50.0 mL). The organic layers were dried over Na<sub>2</sub>SO<sub>4</sub>, filtered and the solvent was removed *in vacuo*. The residue was purified by flash column chromatography on silica (Petroleum ether: EtOAc = 1.5:1) to afford the corresponding **20oc** (3.30 g, 91%) as a white solid: <sup>1</sup>H NMR (400 MHz, CDCl<sub>3</sub>) δ 7.31 – 7.27 (m, 2H), 7.25 – 7.21 (m, 1H), 7.10 – 7.08 (m, 2H), 6.52 (d, *J* = 7.8 Hz, 0H), 6.35 (d, *J* = 8.1 Hz, 1H), 5.02 – 5.00 (m, 1H), 4.83 – 4.78 (m, 1H), 4.45 – 4.40 (m, 1H), 3.89 (dd, *J* = 8.6, 6.8 Hz, 1H), 3.69 (s, 3H), 3.14 – 3.05 (m, 1H), 1.86 – 1.84 (m, 1H), 1.66 – 1.57 (m, 2H), 1.52 – 1.42 (m, 11H), 1.15 – 1.07 (m, 1H), 0.91 – 0.87 (m, 12H). <sup>13</sup>C NMR (101 MHz, CDCl<sub>3</sub>) δ 171.8, 171.7, 171.4, 135.8, 129.4, 128.8, 127.3, 80.2, 59.5, 53.4, 52.5, 51.7, 41.2, 38.0, 36.9, 28.4, 24.9, 24.7, 23.0, 22.0, 15.7, 11.4. HRMS (ESI) *m/z* calcd for C<sub>27</sub>H<sub>43</sub>N<sub>3</sub>NaO<sub>6</sub> [M + Na]<sup>+</sup> 528.3044, found 528.3038.

**20of** was dissolved in sat. HCl soln in MeOH (20 mL) and stirred at rt for 2 h. The mixture was then evaporated and dried under high vacuum to give **20od**. According to the general protocol E, HCTU (3.10 g, 7.50 mmol, 1.50 equiv) and DIPEA (2.60 mL, 15.0 mmol, 3.00 equiv) was added to a solution of 2-(di(*tert*-butoxycarbonyl)amino)acrylic acid **S3** (1.44 g, 5.00 mmol, 1.00 equiv) in anhydrous DCM:DMF (18.0 mL, 2:8). The solution was cooled to 0 °C and stirred under N<sub>2</sub> for 30 min. **20od** (2.10 g, 5.00 mmol, 1.00 equiv) was added to the first solution and the mixture was stirred at rt for 12 h, after which time the reaction mixture was diluted with H<sub>2</sub>O (25.0 mL) and EtOAc (50.0 mL). The crude material was washed with 1 M HCl solution (2 × 30.0 mL), sat. aq. NaHCO<sub>3</sub> solution (2 × 30.0 mL) and brine (2 × 30.0 mL). The organic layers were dried over Na<sub>2</sub>SO<sub>4</sub>, filtered and the solvent was removed *in vacuo*. The product was purified by flash column chromatography with an eluent Petroleum ether: EtOAc = 1.5:1 to afford the corresponding **20o** (662 mg, 19%) as a white solid: [ $\alpha$ ]<sub>D</sub><sup>25</sup> = -2.2 (c = 0.09, CHCl<sub>3</sub>); <sup>1</sup>H NMR (400 MHz, CD<sub>3</sub>CN) δ 7.32 – 7.16 (m, 5H), 6.97 (d, *J* = 7.7 Hz, 1H), 6.91 (d, *J* = 8.0 Hz, 1H), 6.80 (d, *J* = 7.9 Hz, 1H), 6.06 (d, *J* = 1.1 Hz, 1H), 5.52 (d, *J* = 1.1 Hz, 1H), 4.60 – 4.54 (m, 1H), 4.32 – 4.22 (m, 2H), 3.61 (s, 3H), 3.08 (dd, *J* = 13.8, 6.0 Hz, 1H), 2.97 (dd, *J* = 13.9, 7.8 Hz, 1H), 1.83 (m, 1H), 1.62 – 1.55 (m, 1H), 1.50 – 1.40 (m, 21H), 1.14 – 1.08 (m, 1H), 0.90 – 0.83 (m, 12H). <sup>13</sup>C NMR (101 MHz, CD<sub>3</sub>CN) δ 172.7, 172.6, 171.6, 164.6, 151.7, 140.0, 137.7, 130.2, 129.3, 127.7, 121.0, 83.9, 58.8, 54.6, 52.6, 52.4, 41.5, 38.0, 37.9, 28.0, 25.6, 25.2, 23.2, 21.8, 15.9, 11.4; HRMS (ESI) *m/z* calcd for C<sub>35</sub>H<sub>54</sub>N<sub>4</sub>NaO<sub>9</sub> [M + Na]<sup>+</sup> 697.3783, found 697.3791.

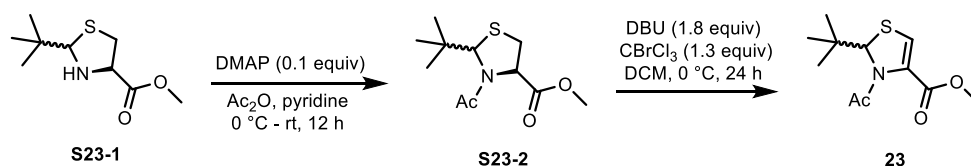

**Methyl @-3-acetyl-2-(*tert*-butyl)-2,3-dihydrothiazole-4-carboxylate (23).** **S23-1** was prepared by following the previously reported procedure.<sup>18</sup> To a solution of crude **S23-1** (4.58 g, 20.0 mmol, 1.00 equiv) in pyridine (20.0 mL) and Ac<sub>2</sub>O (20.0 mL), DMAP (0.244 g, 2.00 mol, 0.10 equiv.) was added. The mixture was stirred at 0 °C for 10 min. The reaction mixture was stirred at 25 °C for 12 h before the solvent was removed under reduced pressure. The obtained residue was treated with 1 M HCl and extracted with ethyl acetate (3 × 100.0 mL). The combined organic layers were washed with brine dried over Na<sub>2</sub>SO<sub>4</sub> and the solvent was removed *in vacuo*. The residue was purified by flash column chromatography on silica (petroleum ether: EtOAc = 3:1) to give product **S23-2** as a yellow oil (3.60 g, 71% yield over two steps).

To a solution of **S23-2** (3.60 g, 15.6 mmol, 1.00 equiv.) in DCM (50.0 mL) the DBU (4.20 mL, 28.0 mmol, 1.80 equiv.) was added. The mixture was stirred at 0 °C for 10 min, then CBrCl<sub>3</sub> (2.00 mL, 20.3 mmol, 1.30 equiv.) was added, and the reaction mixture was stirred at 0 °C for 24 h. After the reaction completed, saturated aqueous NaHCO<sub>3</sub> (50.0 mL) was added at 0 °C, and the reaction mixture was warmed to 25 °C. After the two layers separated, the aqueous phase was extracted with DCM (100.0 mL × 3). The combined organic layers were dried over Na<sub>2</sub>SO<sub>4</sub>, filtered off, and the solvent was removed in vacuo. The residue was purified by flash column chromatography on silica (EaOAc: Petroleum ether = 1/3) to give product **23** as light yellow oil (0.420 g, 1.70 mmol, 12%): <sup>1</sup>H NMR (400 MHz, CDCl<sub>3</sub>) δ 7.11 (s, 1H), 5.77 (s, 1H), 3.74 (s, 3H), 2.01 (s, 3H), 0.83 (s, 9H); <sup>13</sup>C NMR (101 MHz, CDCl<sub>3</sub>) δ 173.2, 160.2, 131.4, 129.5, 78.3, 52.2, 38.7, 24.4, 22.3; HRMS (ESI) *m/z* calcd for C<sub>11</sub>H<sub>17</sub>NNaO<sub>3</sub>S<sup>+</sup> [M + Na]<sup>+</sup> 266.0821; found 266.0821.

## 7. Synthetic Applications and Transformation

### 7.1 Gram Scale Reaction

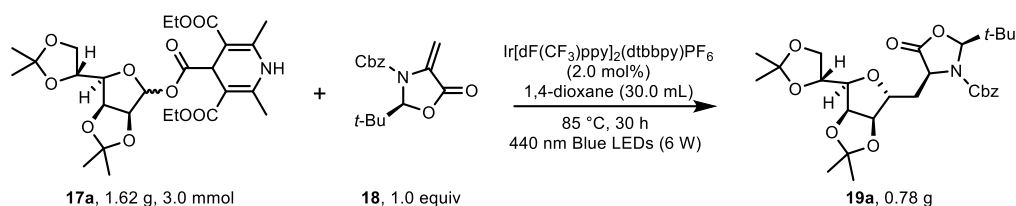

According to the general protocol B, **17a** (1.62 g, 3.00 mmol, 1.50 equiv), **18** (580 mg, 2.00 mmol, 1.00 equiv), Ir[dF(CF<sub>3</sub>)ppy]<sub>2</sub>(dtbbpy)PF<sub>6</sub> (20.0 mg, 0.004 mmol, 0.020 equiv) were added to anhydrous 1,4-dioxane (30.0 mL). The reaction mixture was stirred at 85 °C under 6W Blue LEDs for 30 h and afforded after chromatographic purification on SiO<sub>2</sub> (Petroleum ether:EtOAc = 6:1) **19a** (0.78 g, 77%) as a yellow foam.

### 7.2 Derivation of (+)-Sclareolide from Deoxygenative Radical Addition

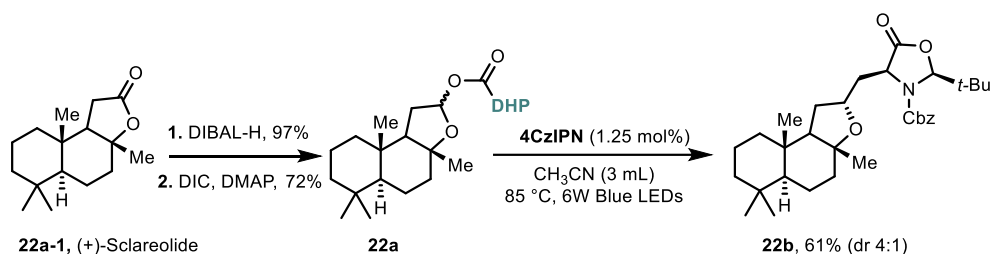

#### Benzyl

(*2S,4S*)-2-(*tert*-butyl)-5-oxo-4-(((*3aR,5aS,9aS,9bR*)-3a,6,6,9a-tetramethyldodecahydronaphtho[2,1-*b*]furan-2-yl)methyl)oxazolidine-3-carboxylate (**22b**). According to the reported method<sup>[11]</sup>, **22a** was prepared from **22a-1** over two steps. According to the general protocol A, **22a** (167 mg, 0.300 mmol, 1.50 equiv), benzyl (*S*)-2-(*tert*-butyl)-4-methylene-5-oxooxazolidine-3-carboxylate **18** (58.0 mg, 0.200 mmol, 1.00 equiv), 4CzIPN (4.0 mg, 0.005 mmol, 0.025 equiv) were added to anhydrous CH<sub>3</sub>CN (3.00 mL). The reaction mixture was stirred at 85 °C under 6W Blue LEDs irradiation for 20 h and afforded after chromatographic purification on SiO<sub>2</sub> (Petroleum ether: EtOAc = 5:1) **22b** (62.0 mg, 61%, d.r. = 4:1) as an oil: <sup>1</sup>H NMR (400 MHz, CDCl<sub>3</sub>) δ 7.38 – 7.36 (m, 5H), 5.57 (s, 1H), 5.22 – 5.15 (m, 2H), 4.55 (dd, *J* = 8.4, 5.9 Hz, 0H), 4.41 – 4.35 (m, 2H), 2.23 – 2.13 (m, 1H), 2.08 – 2.01 (m, 0H), 1.92 – 1.82 (m, 2H), 1.80 – 1.69 (m, 2H), 1.66 – 1.61 (m, 1H), 1.50 – 1.35 (m, 5H), 1.33 – 1.11 (m, 9H), 1.03 (s, 3H), 0.96 – 0.93 (m, 1H), 0.91 – 0.89 (m, 0H), 0.87 – 0.85 (m, 4H), 0.81 – 0.81 (m, 3H), 0.78 (s, 3H); <sup>13</sup>C NMR (101 MHz, CDCl<sub>3</sub>) δ 172.7, 156.1, 135.4, 128.9, 128.8, 128.8, 128.7, 96.6, 80.8, 72.6, 68.4, 59.0, 57.4, 55.1, 42.5, 40.5, 40.0, 39.9, 37.1, 36.1, 33.7, 33.2, 27.5, 25.1, 21.7, 21.2, 20.7, 18.5, 15.1; HRMS (ESI) *m/z* calcd

for  $C_{32}H_{47}NNaO_5$   $[M + Na]^+$  548.3346, found 548.3348.

### 7.3 Selective Glycosylation of Thiazoline under Photoredox Conditions

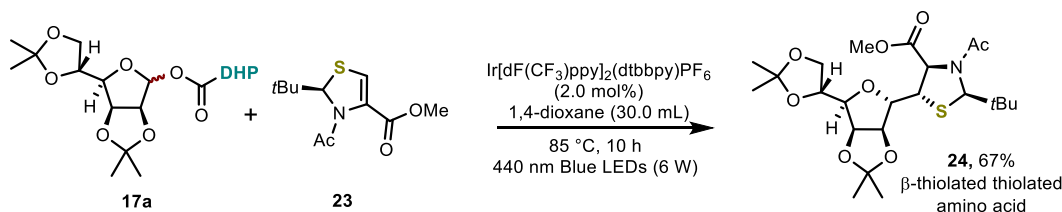

**Methyl (2R,4R)-3-acetyl-2-(tert-butyl)-5-((3aS,4R,6R,6aS)-6-((R)-2,2-dimethyl-1,3-dioxolan-4-yl)-2,2-dimethyltetrahydrofuro[3,4-d][1,3]dioxol-4-yl)thiazolidine-4-carboxylate (24).** According to the general protocol B, methyl 3-acetyl-2-(tert-butyl)-2,3-dihydrothiazole-4-carboxylate **23** (162 mg, 0.300 mmol, 1.50 equiv), methyl 2-phthalimidoacrylate<sup>1</sup> **17a** (46.0 mg, 0.200 mmol, 1.00 equiv),  $Ir[dF(CF_3)ppy]_2(dtbbpy)PF_6$  (4.5 mg, 0.004 mmol, 0.020 equiv) were added to anhydrous 1,4-dioxane (3.00 mL). The reaction mixture was stirred at 85 °C under 6 W Blue LEDs irradiation for 10 h and afforded after chromatographic purification on  $SiO_2$  (Petroleum ether: EtOAc = 3:1) **24** (65.0 mg, 67%) as a colorless foam. The NMR data supports that **24** exists as a mixture of rotamers. It was recorded at DMSO- $d_6$  (25 °C and 80 °C), respectively. Both solvent and temperature affect the ratio of isomers. <sup>1</sup>H NMR (400 MHz, DMSO- $d_6$ , 25 °C)  $\delta$  5.41 (s, 0.80H), 5.16 (d,  $J$  = 2.7 Hz, 1H), 4.99 (d,  $J$  = 6.9 Hz, 0.20H), 4.79 – 4.73 (m, 2H), 4.25 (dd,  $J$  = 4.5, 1.8 Hz, 0.80H), 4.21 – 4.03 (m, 3.20H), 3.99 – 3.90 (m, 1H), 3.80 (dd,  $J$  = 8.5, 5.3 Hz, 1H), 3.72 (s, 2.40H), 3.67 (s, 0.60H), 2.20 (s, 0.60H), 2.11 (s, 2.40H), 1.39 (s, 2.40H), 1.32 – 1.31 (m, 3H), 1.27 – 1.23 (m, 6.60H), 0.97 (s, 1.80H), 0.82 (s, 7.20H); <sup>13</sup>C NMR (101 MHz, DMSO- $d_6$ , 25 °C)  $\delta$  171.5, 170.4, 111.8, 108.1, 86.6, 84.1, 83.3, 80.9, 72.8, 71.9, 67.2, 66.1, 52.7, 49.9, 37.8, 26.6 (2), 26.3, 25.2, 24.6, 23.4.; <sup>1</sup>H NMR (500 MHz, DMSO- $d_6$ , 80 °C)  $\delta$  5.09 (d,  $J$  = 3.9 Hz, 1H), 4.81 (dd,  $J$  = 6.0, 3.8 Hz, 1H), 4.76 (dd,  $J$  = 6.0, 1.8 Hz, 1H), 4.22 – 4.12 (m, 4H), 3.96 (dd,  $J$  = 8.4, 6.3 Hz, 1H), 3.84 (dd,  $J$  = 8.4, 5.7 Hz, 1H), 3.74 (s, 3H), 2.15 (s, 3H), 1.43 (s, 3H), 1.35 (s, 3H), 1.30 (s, 3H), 1.28 (s, 3H), 0.91 (s, 9H); HRMS (ESI)  $m/z$  calcd for  $C_{23}H_{37}NNaO_8S$   $[M + Na]^+$  510.2132, found 510.2135.

### 7.4 Deprotection and Peptide Coupling

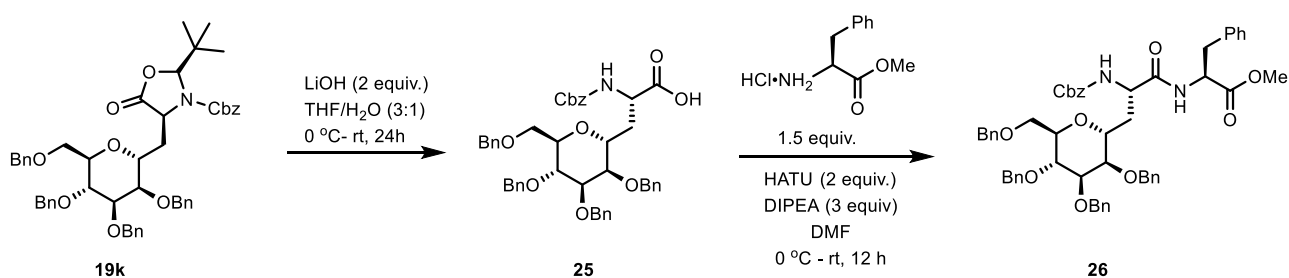

#### (S)-2-(((Benzyloxy)carbonyl)amino)-3-((2R,3R,4R,5R,6R)-3,4,5-tris(benzyloxy)-6-((benzyloxy)methyl)tetrahydro-2H-pyran-2-yl)propanoic acid (25)

A solution of **19k** (405 mg, 0.500 mmol, 1.00 equiv) in THF/H<sub>2</sub>O (12.0 mL, 3:1 v/v) was cooled to 0 °C and treated with lithium hydroxide monohydrate (42.0 mg, 1.00 mmol, 2.00 equiv). After stirring at 0 °C for 1 h and at rt for another 24 h, the mixture was added H<sub>2</sub>O (10.0 mL) and concentrated *in vacuo*. The resulted solution was acidified to pH 2-3 by careful addition of 1.0 M hydrochloric acid, and the mixture was extracted with EtOAc (2 × 10.0 mL). The combined organic layers were dried over Na<sub>2</sub>SO<sub>4</sub>, concentrated,

and purified by flash column chromatography on SiO<sub>2</sub> (Petroleum ether: acetone = 4:1) to afford **25** (258 mg, 70%) as a white foam:  $[\alpha]_D^{25} = +10.7$  (c = 1.20, CHCl<sub>3</sub>); <sup>1</sup>H NMR (400 MHz, CDCl<sub>3</sub>) δ 7.33 – 7.23 (m, 23H), 7.18 – 7.16 (m, 2H), 6.14 (d, *J* = 6.3 Hz, 1H), 5.06 (s, 2H), 4.63 (d, *J* = 11.5 Hz, 1H), 4.57 – 4.43 (m, 7H), 4.36 (t, *J* = 6.1, 6.1 Hz, 1H), 4.23 – 4.19 (m, 1H), 3.91 – 3.87 (m, 1H), 3.77 – 3.68 (m, 3H), 3.59 (dd, *J* = 6.6, 3.3 Hz, 2H), 2.19 – 2.15 (m, 1H), 2.10 – 2.03 (m, 1H); <sup>13</sup>C NMR (101 MHz, CDCl<sub>3</sub>) δ 175.1, 156.3, 138.2, 138.1, 137.9, 136.5, 128.6, 128.5(2), 128.2, 128.1(2), 128.0(2), 127.9(2), 127.8, 76.3, 74.9, 73.7, 73.3, 72.3, 71.9, 69.7, 68.9, 66.9, 52.3, 34.7; HRMS (ESI) *m/z*: [M + Na]<sup>+</sup> calcd for C<sub>45</sub>H<sub>47</sub>NNaO<sub>9</sub> 768.3143; found 768.3143.

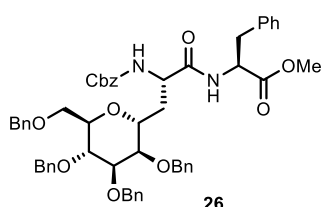

**Methyl ((S)-2-(((benzyloxy)carbonyl)amino)-3-((2R,3R,4R,5R,6R)-3,4,5-tris(benzyloxy)-6-((benzyloxy)methyl)tetrahydro-2H-pyran-2-yl)propanoyl)-L-phenylalaninate (26).**

*(S)*-2-(((Benzyloxy)carbonyl)amino)-3-((2*R*,3*R*,4*R*,5*R*,6*R*)-3,4,5-tris(benzyloxy)-6-((benzyloxy)methyl)tetrahydro-2*H*-pyran-2-yl)propanoic acid **25** (89.4 mg, 0.120 mmol, 1.00 equiv), HATU (91.2 mg, 0.240 mmol, 2.00 equiv) and DIPEA (46.4 mg, 0.360 mmol, 3.00 equiv) were added anhydrous DMF (3.00 mL) at 0 °C. After stirring for 0.5 h, *L*-phenylalanine methyl ester hydrochloride (38.9 mg, 0.180 mmol, 1.50 equiv) was added. After stirring at rt for 12 h, the reaction mixture was diluted with H<sub>2</sub>O (5.00 mL) and EtOAc (10.0 mL), washed with 1.0 M HCl solution (2 × 5.00 mL), sat. aq. NaHCO<sub>3</sub> solution (2 × 5.00 mL) and brine (2 × 5.00 mL). The organic layer was dried over Na<sub>2</sub>SO<sub>4</sub>, filtered, concentrated, and purified by flash column chromatography on SiO<sub>2</sub> (Toluene: EtOAc = 5:1) to afford **26** (64.0 mg, 59%) as a white solid:  $[\alpha]_D^{25} = +6.3$  (c = 0.62, CHCl<sub>3</sub>); <sup>1</sup>H NMR (400 MHz, CD<sub>3</sub>CN) δ 7.35 – 7.24 (m, 25H), 7.22 – 7.15 (m, 3H), 7.11 (d, *J* = 7.3 Hz, 2H), 7.02 (d, *J* = 7.9 Hz, 1H), 6.07 (d, *J* = 7.4 Hz, 1H), 5.04 (s, 2H), 4.66 – 4.43 (m, 9H), 4.21 (q, *J* = 7.4, 7.4, 7.3 Hz, 1H), 4.12 – 4.08 (m, 1H), 3.87 – 3.78 (m, 3H), 3.69 (t, *J* = 6.0, 6.0 Hz, 1H), 3.63 – 3.54 (m, 5H), 3.03 (dd, *J* = 13.9, 5.7 Hz, 1H), 2.85 (dd, *J* = 13.9, 7.7 Hz, 1H), 1.93 – 1.90 (m, 1H), 1.85 – 1.78 (m, 1H); <sup>13</sup>C NMR (101 MHz, CD<sub>3</sub>CN) δ 172.6, 172.1, 156.8, 139.6, 139.5, 139.4, 138.0, 137.7, 130.2, 129.4, 129.3, 129.3, 129.2 (2), 128.9, 128.8 (4), 128.7, 128.5 (2), 127.7, 77.2, 75.6, 74.1, 74.0, 73.3, 72.7, 72.1, 70.1, 69.2, 67.1, 54.5, 53.5, 52.7, 38.0, 33.3, 31.5, 30.4; HRMS (ESI) *m/z* [M + Na]<sup>+</sup> calcd for C<sub>55</sub>H<sub>58</sub>N<sub>2</sub>NaO<sub>10</sub> 929.3984, found 929.3985.

## 7.5 Comparison with the Reported Method

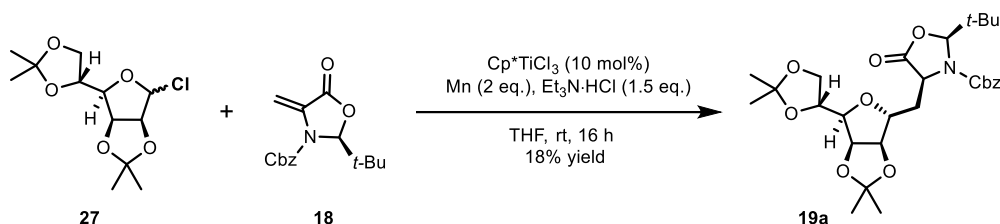

According to the reported protocol,<sup>19</sup> (3*aS*,6*R*,6*aS*)-4-Chloro-6-((*R*)-2,2-dimethyl-1,3-dioxolan-4-yl)-2,2-dimethyltetrahydrofuro[3,4-*d*][1,3]dioxole **27** (55.6 mg, 0.200 mmol, 1.00 equiv), benzyl (*S*)-2-(*tert*-butyl)-4-methylene-5-oxooxazolidine-3-carboxylate **18** (83.0 mg, 0.300 mmol, 1.50 equiv), CpTiCl<sub>3</sub> (4.4 mg, 0.0200 mmol, 0.010 equiv), Mn (22.0 mg, 0.400 mmol, 2.00 equiv), Et<sub>3</sub>N·HCl (41.3 mg, 0.300 mmol, 1.50 equiv) were added to THF (2.00 mL). The reaction mixture was stirred under N<sub>2</sub> at rt for 16 h and afforded after chromatographic purification on SiO<sub>2</sub> (Petroleum ether: EtOAc = 3:1) **19a** (17.0 mg, 18% yield).

## 8. Mechanistic Studies

### 8.1 Radical Trapping Experiments

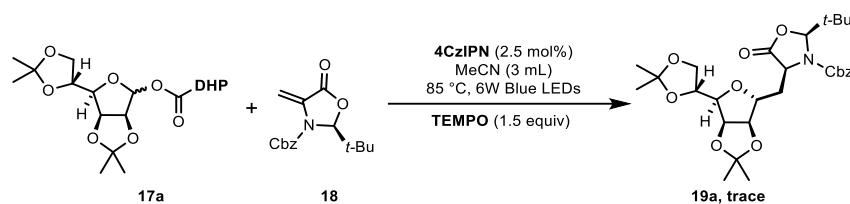

According to the general protocol A, **17a** (162 mg, 0.300 mmol, 1.50 equiv), **18** (58.0 mg, 0.200 mmol, 1.00 equiv), 4CzIPN (4.0 mg, 0.005 mmol, 0.025 equiv) and TEMPO (46.8 mg, 0.200 mmol, 1.00 equiv) were added to anhydrous CH<sub>3</sub>CN (3.00 mL). The reaction mixture was stirred at 85 °C under 6W blue LED irradiation for 20 h. Trace of **19a** was detected.

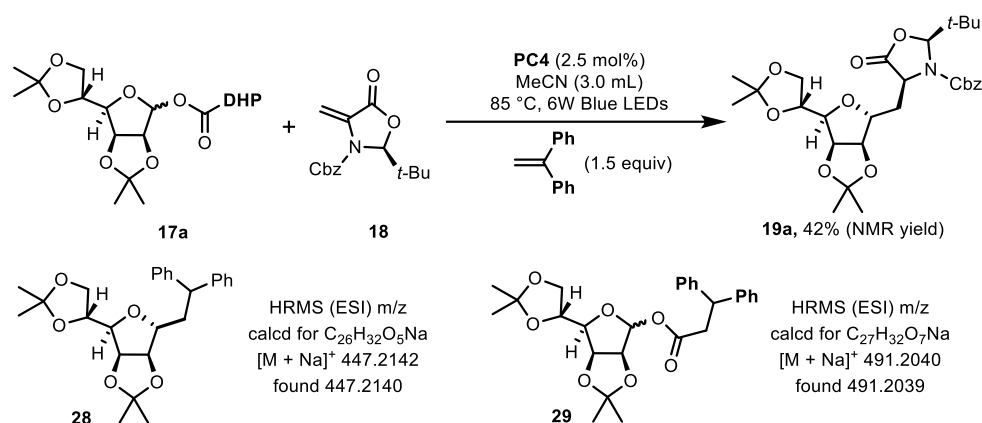

According to the general protocol A, **17a** (162 mg, 0.300 mmol, 1.50 equiv), **18** (58.0 mg, 0.200 mmol, 1.00 equiv), 4CzIPN (4.0 mg, 0.005 mmol, 0.0250 equiv) and 1,1-diphenylethylene (54.0 mg, 0.200 mmol, 1.00 equiv) were added to anhydrous CH<sub>3</sub>CN (3.00 mL). The reaction mixture was stirred at 85 °C under 6W blue LED irradiation for 20 h. The yield of **19a** was calculated by using the NMR internal standard. Radical cross-coupling product **30** and **31** were detected by HRMS.

### 8.2 Deuterium Labeling Studies

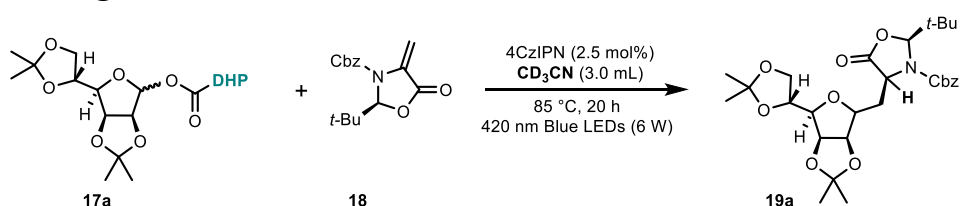

#### Benzyl (2*S*,4*S*)-2-(*tert*-butyl)-4-(((3*aR*,4*R*,6*R*,6*aS*)-6-((*R*)-2,2-dimethyl-1,3-dioxolan-4-yl)-2,2-dimethyltetrahydrofuro[3,4-*d*][1,3]dioxol-4-yl)methyl)-5-oxooxazolidine-3-carboxylate (**19a**).

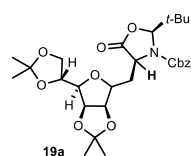

According to the general procedure A, 4-(((3*aS*,4*R*,6*R*,6*aS*)-6-((*S*)-2,2-dimethyl-1,3-dioxolan-4-yl)-2,2-dimethyltetrahydrofuro[3,4-*d*][1,3]dioxol-4-yl) 3,5-diethyl 2,6-dimethyl-1,4-dihydropyridine-3,4,5-tricarboxylate<sup>1</sup> (162 mg, 0.300 mmol, 1.50 equiv), benzyl (*S*)-2-(*tert*-butyl)-4-methylene-5-oxooxazolidine-3-carboxylate<sup>2</sup> (58.0 mg, 0.200 mmol, 1.00 equiv) and 4CzIPN (4.0 mg, 0.005 mmol, 0.025 equiv) were added to anhydrous CD<sub>3</sub>CN (3.00 mL).

The reaction mixture was stirred at 85 °C under 6W blue LED irradiation for 20 h and afforded after chromatographic purification on SiO<sub>2</sub> (Petroleum ether: EtOAc = 6:1) to afford product **19a** (70.7 mg, 67% yield) as a colorless oil.

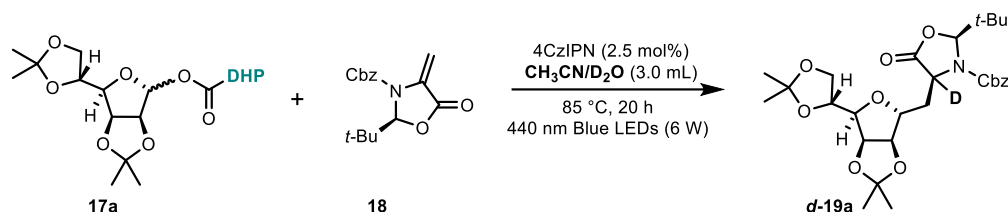

**Benzyl (2*S*,4*S*)-2-(*tert*-butyl)-4-(((3*aR*,4*S*,6*R*,6*aS*)-6-((*R*)-2,2-dimethyl-1,3-dioxolan-4-yl)-2,2-dimethyltetrahydrofuro[3,4-*d*][1,3]dioxol-4-yl)methyl)-5-oxooxazolidine-3-carboxylate-4-*d* (*d*-19a).**

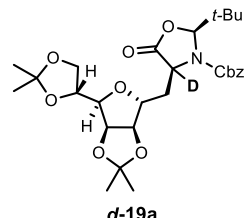

According to the general procedure A, 4-((3*aS*,4*R*,6*R*,6*aS*)-6-((*S*)-2,2-dimethyl-1,3-dioxolan-4-yl)-2,2-dimethyltetrahydrofuro[3,4-*d*][1,3]dioxol-4-yl) 3,5-diethyl 2,6-dimethyl-1,4-dihydropyridine-3,4,5-tricarboxylate<sup>1</sup> **17a** (162 mg, 0.300 mmol, 1.50 equiv), benzyl (*S*)-2-(*tert*-butyl)-4-methylene-5-oxooxazolidine-3-carboxylate<sup>2</sup> **18** (58.0 mg, 0.200 mmol, 1.00 equiv) and 4CzIPN (4.0 mg, 0.005 mmol, 0.0250 equiv) were added to anhydrous CH<sub>3</sub>CN:D<sub>2</sub>O (3.0 mL, 2:1 v/v). The reaction mixture was stirred at

85 °C under 6W blue LED irradiation for 20 h and afforded after chromatographic purification on SiO<sub>2</sub> (Petroleum ether: EtOAc = 6:1) to afford **d-19a** (87.0 mg, 82%) as a colorless oil: <sup>1</sup>H NMR (400 MHz, CDCl<sub>3</sub>) δ 7.43 – 7.28 (m, 5H), 5.54 (s, 1H), 5.26 – 5.14 (m, 2H), 4.77 (dd, *J* = 6.0, 3.8 Hz, 1H), 4.56 (dd, *J* = 9.3, 5.8 Hz, 2H), 4.45 – 4.35 (m, 1H), 4.14 – 4.01 (m, 2H), 3.83 (dd, *J* = 7.8, 3.7 Hz, 1H), 2.06 – 1.88 (m, 2H), 1.50 (s, 3H), 1.43 (s, 3H), 1.38 (s, 3H), 1.33 (s, 3H), 0.94 (s, 9H); <sup>13</sup>C NMR (101 MHz, CDCl<sub>3</sub>) δ 172.3, 155.8, 128.8, 128.7, 112.9, 109.3, 96.5, 85.1, 80.7, 80.5, 80.5, 76.9, 76.8, 73.4, 68.4, 67.1, 54.0, 37.2, 33.8, 27.1, 26.2, 25.3, 24.9, 24.8; HRMS (ESI) *m/z* calcd for C<sub>28</sub>H<sub>38</sub>DO<sub>9</sub>NNa [M + Na]<sup>+</sup> 557.2580, found 557.2581.

### 8.3 Light on-off Experiments

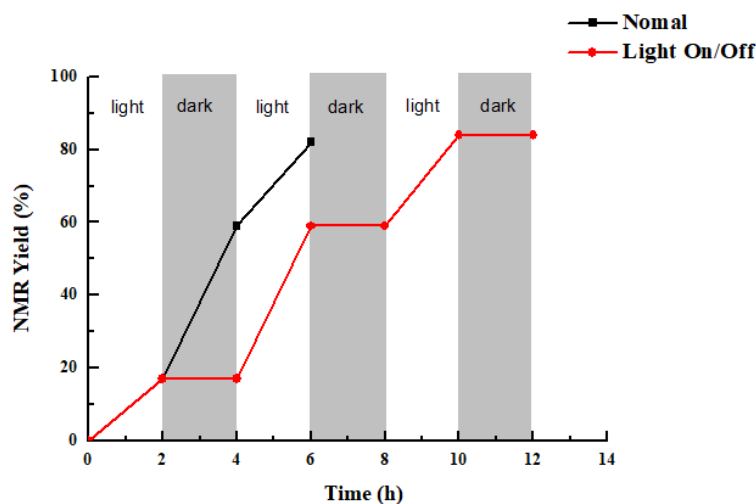

According to the general protocol A, During the light off time, the reaction device is moved into a completely black environment, and during the light on time, the reaction device is in the normal environment. Calculate the yield over each time period by using the NMR internal standard.

### 8.4 The Role of $\alpha$ -Heteroatoms

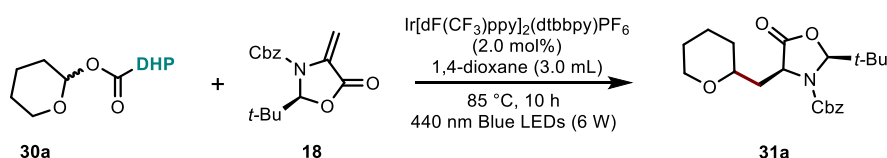

## Benzyl (2*S*,4*S*)-2-(*tert*-butyl)-5-oxo-4-(((*S*)-tetrahydro-2*H*-pyran-2-yl)methyl)oxazolidine-3-carboxylate (**30a**).

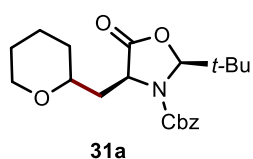

According to the general protocol B, 3,5-diethyl 4-(tetrahydro-2*H*-pyran-2-yl) 2,6-dimethyl-1,4-dihydropyridine-3,4,5-tricarboxylate **30a** (115.0 mg, 0.300 mmol, 1.50 equiv), benzyl (*S*)-2-(*tert*-butyl)-4-methylene-5-oxooxazolidine-3-carboxylate **18** (58.0 mg, 0.200 mmol, 1.00 equiv), Ir[dF(CF<sub>3</sub>)ppy]<sub>2</sub>(dtbbpy)PF<sub>6</sub> (4.5 mg, 0.004 mmol, 0.020 equiv) were added to anhydrous 1,4-dioxane (3.00 mL). The reaction mixture was stirred

at 85 °C under 6W Blue LEDs irradiation for 10 h and afforded after chromatographic purification on SiO<sub>2</sub> (Petroleum ether: EtOAc = 8:1) to afford **31a** (36.0 mg, 48%) as a light yellow oil: <sup>1</sup>H NMR (400 MHz, CDCl<sub>3</sub>) δ 7.39 – 7.35 (m, 5H), 5.58 (s, 1H), 5.23 – 5.13 (m, 2H), 4.56 (dd, *J* = 7.2, 5.3 Hz, 1H), 3.85 (dd, *J* = 11.5, 4.3 Hz, 1H), 3.55 – 3.49 (m, 1H), 3.17 (t, *J* = 11.5 Hz, 1H), 2.14 – 2.07 (m, 1H), 1.83 – 1.74 (m, 2H), 1.58 – 1.47 (m, 2H), 1.45 – 1.33 (m, 2H), 1.26 – 1.19 (m, 2H), 0.95 (s, 9H); <sup>13</sup>C NMR (101 MHz, CDCl<sub>3</sub>) δ 173.2, 156.4, 135.4, 96.6, 73.9, 68.6, 68.4, 54.2, 40.8, 37.1, 31.9, 26.0, 25.1, 23.4; HRMS (ESI) *m/z* calcd for C<sub>21</sub>H<sub>29</sub>NNaO<sub>5</sub> [M + Na]<sup>+</sup> 398.1938, found 398.1937.

## 9. Computational Details

All DFT calculations were performed with Gaussian09<sup>20</sup> or Gaussian16 software packages.<sup>21</sup> Geometry optimizations of all the minima were performed at B97XD/6-31+G(d,p) (SDM DCM). Vibrational frequencies were computed at the same level to evaluate thermal corrections at 298 K. All structures in Figure 4 were characterized by NIMAG=0 or NIMAG=1 for transition states. The single-point energies were computed at B97XD/6-311+G(d,p) (SDM DCM). SMD solvation model was used for DCM to optimize all structures.<sup>22</sup> To correct the Gibbs free energies under pressure of 1 atm to the standard state in solution (1 mol/L), a correction of  $RT\ln(c_s/c_g)$  (about 1.89 kcal/mol) is added to energies of all species. *c<sub>s</sub>* is the standard molar concentration in solution (1 mol/L), *c<sub>g</sub>* is the standard molar concentration in gas phase (0.0446 mol/L), and *R* is the gas constant. Electronic energies and Gibbs free energy corrections reported in Hartrees.

### Summary of Thermodynamic Parameters for Structures

|         |              |             |             | CO <sub>2</sub> |             |             |             |              |              |              |             |
|---------|--------------|-------------|-------------|-----------------|-------------|-------------|-------------|--------------|--------------|--------------|-------------|
| EE      | -1164.366429 | -459.66758  | -459.638966 | -188.580463     | -271.106847 | -704.585648 | -745.755307 | -1016.926122 | -1016.869023 | -1017.569581 | -704.014942 |
| DG corr | 0.2888       | 0.115437    | 0.109748    | -0.008997       | 0.10451     | 0.142052    | 0.206813    | 0.337034     | 0.332054     | 0.351262     | 0.134907    |
| DH corr | 0.365946     | 0.158788    | 0.154901    | 0.015282        | 0.140278    | 0.19946     | 0.265201    | 0.410377     | 0.406975     | 0.423192     | 0.190427    |
| DG      | -1164.077629 | -459.552143 | -459.529218 | -188.58946      | -271.002337 | -704.443596 | -745.548494 | -1016.589088 | -1016.536969 | -1017.218319 | -703.880035 |
| DH      | -1164.000483 | -459.508792 | -459.484065 | -188.565181     | -270.966569 | -704.386188 | -745.490106 | -1016.515745 | -1016.462048 | -1017.146389 | -703.824515 |

|         |              |            |             | CO <sub>2</sub> |             |             |             |             |             |             |             |
|---------|--------------|------------|-------------|-----------------|-------------|-------------|-------------|-------------|-------------|-------------|-------------|
| EE      | -1128.469864 | -423.77043 | -423.731266 | -188.580463     | -235.209204 | -704.585648 | -745.755307 | -981.03045  | -980.969123 | -981.672656 | -704.014942 |
| DG corr | 0.312638     | 0.138966   | 0.133686    | -0.008997       | 0.126539    | 0.142052    | 0.206813    | 0.360506    | 0.35587     | 0.373426    | 0.134907    |
| DH corr | 0.390007     | 0.182824   | 0.178207    | 0.015282        | 0.16326     | 0.19946     | 0.265201    | 0.434519    | 0.430259    | 0.447271    | 0.190427    |
| DG      | -1128.157226 | 423.631464 | -423.59758  | -188.58946      | -235.082665 | -704.443596 | -745.548494 | -980.669944 | -980.613253 | -981.29923  | -703.880035 |
| DH      | -1128.079857 | 423.587606 | -423.553059 | -188.565181     | -235.045944 | -704.386188 | -745.490106 | -980.595931 | -980.538864 | -981.225385 | -703.824515 |



## Cartesian Coordinates

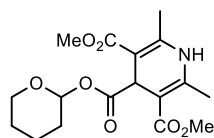

O 1

O -0.48886700 -1.00155700 -0.36867200  
C 0.14589100 -0.07989300 -1.10991300  
C 0.89706000 0.90960400 -0.20941400  
O 0.12983700 -0.04977100 -2.31845400  
C 2.08038000 0.23259800 0.46693200  
C 2.06072700 -0.09160500 1.77784100  
N 1.01819300 0.25607500 2.59372100  
C 0.04580900 1.10591000 2.14319700  
C -0.02982100 1.48434600 0.85056500  
C 3.26195500 -0.05545700 -0.35908100  
C -1.11870100 2.39984100 0.47820000  
O -1.15449800 2.60505500 -0.84428900  
O -1.91534800 2.90912300 1.25170700  
C -2.20570100 3.44133300 -1.33954500  
O 3.38474000 0.31005100 -1.51574700  
O 4.20799000 -0.75904900 0.28435200  
C 5.39563100 -1.05513900 -0.45902600  
H 1.25582200 1.69189900 -0.88261700  
H 2.88088600 -0.60985800 2.25844100  
H 1.06760600 0.03705100 3.57782200  
H -0.65369400 1.47061200 2.88599500  
H -2.06490500 3.47492700 -2.41912600  
H -3.18043200 3.01053900 -1.09876100  
H -2.12955700 4.44519800 -0.91546100  
H 6.02597200 -1.63020500 0.21861100  
H 5.15716500 -1.64680200 -1.34591800  
H 5.90358400 -0.13452800 -0.75599500  
C -1.38073600 -1.92105800 -1.03504700  
C -1.56209300 -3.10206700 -0.09437400  
H -0.93440600 -2.21175300 -1.98688700  
C -2.36407000 -2.70961300 1.14841300  
H -0.57760100 -3.50171500 0.16628500  
H -2.09711000 -3.87722700 -0.65478700  
C -3.33797500 -0.84894600 -0.20973400  
C -3.65574400 -2.00696200 0.72399500  
H -2.58474400 -3.59927200 1.74632800  
H -1.76812600 -2.03601600 1.77634100

H -2.78512700 -0.06445300 0.32443100  
H -4.24369500 -0.40458100 -0.62710700  
H -4.20053300 -1.62318000 1.59326700  
H -4.31330200 -2.71693800 0.20684000  
O -2.57395600 -1.27429900 -1.34662100

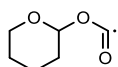

0 2

O 1.17569700 -0.49198500 -0.21429000  
C 2.31841400 0.08705400 0.08004000  
O 3.27339500 0.20630500 -0.62452500  
C 0.13755500 -0.42892900 0.83679100  
C -0.95393500 -1.39099200 0.40408500  
H 0.61288700 -0.73006100 1.77176900  
C -1.01369000 1.43874500 -0.09771700  
C -1.75423000 -0.84700100 -0.78071500  
H -0.50365300 -2.36298800 0.18458200  
H -1.61222800 -1.51980700 1.27059700  
C -2.20997100 0.58084700 -0.47427300  
H -1.31380100 2.42960600 0.24674400  
H -0.33756300 1.56032700 -0.95385200  
H -1.13398300 -0.85045600 -1.68514200  
H -2.61257400 -1.49655300 -0.97540600  
H -2.70713400 1.03103100 -1.33970700  
H -2.92758900 0.57509800 0.35546400  
O -0.27524600 0.87636300 1.00327600

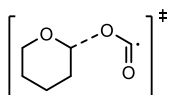

0 2

O 1.58828100 -1.04882600 -0.21171600  
C 2.16516100 0.02049900 -0.13779100  
O 3.14360300 0.63814900 -0.49577600  
C -0.31533500 -0.75566300 0.99596900  
C -1.26984000 -1.38746800 0.05466600  
H 0.12560500 -1.32997100 1.80324600  
C -0.77682600 1.47302400 0.21681200  
C -1.76489600 -0.43257000 -1.02919500  
H -0.78936400 -2.28107700 -0.35935000  
H -2.11464200 -1.74860500 0.66147900  
C -2.04849100 0.92675400 -0.39438400  
H -0.94430500 2.35886900 0.82953100

H -0.03278400 1.69992100 -0.54924800  
H -1.00138300 -0.32224000 -1.80722200  
H -2.66089600 -0.84166800 -1.50214600  
H -2.39700000 1.65147900 -1.13609800  
H -2.82791500 0.83506000 0.37172000  
O -0.14387800 0.52452300 1.13894600

CO<sub>2</sub>

0 1

C 0.00000000 0.00000000 0.00000000  
O 0.00000000 0.00000000 1.16468000  
O 0.00000000 0.00000000 -1.16468000

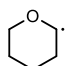

0 2

C 1.38238500 0.25693800 0.19989800  
C -0.32612900 -1.38700900 0.15601400  
C -1.40471200 -0.39162500 -0.14169200  
C -0.99200600 1.02904300 0.25743800  
C 0.40760500 1.31717400 -0.28728800  
H 1.48368500 0.30763900 1.29311400  
H 2.37110100 0.37758600 -0.24743900  
H -1.62227800 -0.40349300 -1.22523300  
H -2.32621800 -0.69830200 0.36400900  
H -1.71587100 1.75666100 -0.12277400  
H -0.98115300 1.11679200 1.35149200  
H 0.39021200 1.32006300 -1.38467000  
H 0.76792600 2.29859000 0.03958400  
H -0.51153600 -2.44918200 0.01571400  
O 0.96765900 -1.07168500 -0.14875200

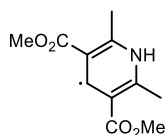

0 2

C -0.00001800 -0.17912500 0.00001900  
C -1.22101900 0.56992300 0.00002800  
C -1.20130900 1.93441700 0.00004800  
N 0.00002700 2.61073300 0.00009100  
C 1.20131300 1.93440000 0.00003900  
C 1.22104000 0.56991600 0.00001800  
C -2.55732000 -0.07706000 0.00001200

S59

C 2.55731800 -0.07706000 -0.00000700  
O 2.47045900 -1.40990800 -0.00002000  
O 3.62052300 0.51976200 -0.00003900  
C 3.70852500 -2.13171600 -0.00008000  
O -3.62050800 0.51978200 -0.00001700  
O -2.47047600 -1.40990000 0.00001200  
C -3.70855200 -2.13169800 -0.00003500  
H -0.00002500 -1.25852100 -0.00000100  
H -2.09891800 2.53853300 0.00005800  
H 0.00004100 3.61978600 -0.00007300  
H 2.09893800 2.53849800 0.00004100  
H 3.43033000 -3.18484000 -0.00021000  
H 4.29006900 -1.89331800 -0.89349100  
H 4.29002100 -1.89353000 0.89342100  
H -3.43036500 -3.18482400 -0.00014800  
H -4.29004300 -1.89348900 0.89346100  
H -4.29009000 -1.89330700 -0.89345200

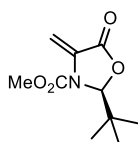

O 1  
C 0.41621100 1.48227100 0.26250100  
N 0.48342100 0.11586700 -0.06491600  
C -0.78843400 -0.30477800 -0.66335000  
O -1.42334500 0.93768200 -1.00723400  
C -0.82135600 1.97707600 -0.40582700  
C 1.21840100 2.26404800 0.98372600  
O -1.25113300 3.10273600 -0.45623200  
C -1.70636200 -1.11946400 0.27202600  
C -1.01394300 -2.44290500 0.62228600  
C -3.00672800 -1.41151800 -0.49030200  
C -2.01309000 -0.34450300 1.55979600  
C 1.62175300 -0.62324200 -0.30934700  
O 2.69748200 -0.06920100 0.24410900  
O 1.62166000 -1.66221900 -0.94317100  
C 3.94158200 -0.74993600 0.01531400  
H -0.59737900 -0.85007100 -1.58951300  
H 2.11078600 1.89831700 1.47206600  
H 0.95945900 3.31374300 1.07054400  
H -1.69086400 -3.05325100 1.22884900  
H -0.09991200 -2.28113000 1.20225800  
H -0.75286300 -3.01055600 -0.27599300

H -3.66164000 -2.03681400 0.12494600  
H -3.54693400 -0.49181400 -0.73346700  
H -2.80574300 -1.95052700 -1.42330000  
H -2.53870900 0.59528600 1.36040200  
H -2.66085600 -0.95113000 2.20055400  
H -1.10188000 -0.12302300 2.12539600  
H 4.69144800 -0.15385200 0.53313700  
H 3.90381200 -1.75866200 0.43092400  
H 4.16180600 -0.79185100 -1.05309700

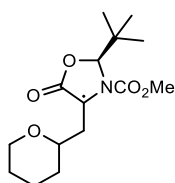

0 2

N -0.91038300 0.21655100 0.07063000  
C -2.08208200 -0.19755300 -0.72037500  
O -1.91446100 -1.60608100 -0.85027400  
C -0.89369800 -2.04288300 -0.05332200  
C -0.25054800 -0.90320800 0.53500200  
C -0.41104900 1.51183800 -0.04285800  
O 0.32389400 1.84117000 1.00989600  
O -0.67873900 2.24359100 -0.97440600  
C 1.09154400 3.04580400 0.88712500  
C 1.04912300 -0.95939700 1.25027400  
O -0.63166700 -3.22899000 0.05713800  
C -3.43914500 0.11308500 -0.04735400  
C -3.60780500 1.63032300 0.10697400  
C -4.53937400 -0.42562500 -0.97335500  
C -3.53197800 -0.55794900 1.32806800  
H -2.03140500 0.25508300 -1.71413600  
H 1.75985100 2.97535300 0.02646500  
H 0.43287400 3.91088100 0.78798300  
H 1.66870800 3.11333900 1.80818300  
H 1.13376000 -0.14124600 1.96718600  
H 1.08716100 -1.90574200 1.79873600  
H -4.61412500 1.84215900 0.48263700  
H -2.89634500 2.05141500 0.82478900  
H -3.48438700 2.15063000 -0.84787900  
H -5.52277000 -0.19692100 -0.55001700  
H -4.46586700 -1.51014500 -1.09548900  
H -4.48330300 0.03793800 -1.96508000  
H -3.44947900 -1.64709900 1.25594800

H -2.75411300 -0.19302200 2.00724000  
 H -4.50227800 -0.32786500 1.77993500  
 C 2.24523700 -0.93097200 0.28723900  
 C 3.57920800 -0.88280500 1.02780300  
 H 2.21358600 -1.83735000 -0.34107800  
 C 3.10797500 0.28857400 -1.55057000  
 C 4.73810800 -0.75856100 0.03456000  
 H 3.57129300 -0.01756400 1.70410200  
 H 3.68544500 -1.78414400 1.64173200  
 C 4.48962400 0.41127300 -0.92099800  
 H 2.86150500 1.16334500 -2.15787300  
 H 3.06288600 -0.60306400 -2.19722100  
 H 5.68532700 -0.62868400 0.56814000  
 H 4.81940400 -1.68840500 -0.54445800  
 H 5.24673500 0.43993100 -1.71248600  
 H 4.54782700 1.35996300 -0.37228400  
 O 2.09216800 0.20202300 -0.55970000

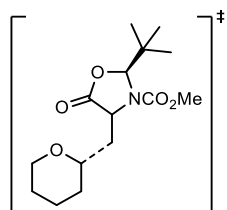

0 2

N 1.01621200 0.44181300 -0.12404400  
 C 1.91076300 -0.43270200 0.64087200  
 O 1.20534500 -1.68104800 0.68592700  
 C 0.19585300 -1.69830000 -0.21379100  
 C 0.05619700 -0.35627800 -0.78998100  
 C 0.90011700 1.76402700 0.22621700  
 O 0.02765900 2.40483100 -0.55441900  
 O 1.53578900 2.28660600 1.12595300  
 C -0.23453100 3.77296900 -0.21590300  
 C -0.88715400 -0.02796100 -1.69844000  
 O -0.45252700 -2.69810800 -0.43442700  
 C 3.30480800 -0.63873800 0.01031000  
 C 4.04096700 0.70666300 -0.02599800  
 C 4.07898000 -1.61945500 0.90249600  
 C 3.19124400 -1.19965300 -1.41277300  
 H 2.00443300 -0.06092200 1.66336500  
 H -0.62363500 3.84974000 0.80181200  
 H 0.67326200 4.37169000 -0.31357100  
 H -0.98489100 4.10538800 -0.93204000  
 H -0.90157000 0.93462700 -2.18709000

H -1.48517800 -0.83251400 -2.11015600  
H 5.05509300 0.55298300 -0.40929200  
H 3.54040700 1.42386100 -0.68425800  
H 4.11570600 1.15190500 0.97086200  
H 5.09395100 -1.75099900 0.51353800  
H 3.59743300 -2.60134300 0.93250800  
H 4.15808900 -1.24281800 1.92891800  
H 2.69424400 -2.17523100 -1.43101500  
H 2.64539600 -0.51712700 -2.07257200  
H 4.19423400 -1.33423900 -1.83054000  
C -3.00666000 0.74538100 -0.62269000  
C -2.75153700 0.93409700 0.84268700  
H -3.04907100 1.62745000 -1.25666600  
C -3.90240900 -1.42877900 -0.32357800  
C -2.72907400 -0.38848000 1.61270300  
H -1.81776400 1.48881500 0.97197300  
H -3.55341900 1.57174200 1.25302000  
C -3.91699600 -1.24985900 1.18501600  
H -2.99862000 -1.97218100 -0.63095800  
H -4.77988100 -1.97103200 -0.68048100  
H -2.75223900 -0.19598600 2.68962600  
H -1.80009700 -0.92911400 1.40096900  
H -3.87688600 -2.23873100 1.65365600  
H -4.85874800 -0.77544600 1.48914100  
O -3.92966100 -0.17112900 -1.01869900

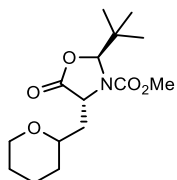

O 1  
N -0.88608700 0.34546600 0.37914800  
C -1.69272200 -0.26488500 -0.67086900  
O -1.36967700 -1.66203000 -0.57375000  
C -0.75150700 -1.94424300 0.57833500  
C -0.42377300 1.62023700 0.22543900  
O 0.17002900 2.05706600 1.34313900  
O -0.58967800 2.29889300 -0.77482300  
C 0.89281100 3.28468500 1.22168100  
C 1.17663100 -0.68168200 1.52057700  
O -0.53008600 -3.07502400 0.93595800  
C -3.22078400 -0.09181200 -0.51630400  
C -3.57939500 1.39483600 -0.63671700



C -3.90030900 -0.86954400 -1.65258100  
C -3.69597400 -0.62095800 0.84290000  
H -1.36382600 0.08512300 -1.65268100  
H 1.67711500 3.18594800 0.46757000  
H 0.22210500 4.10639600 0.96107000  
H 1.33502500 3.45887700 2.20237400  
H 1.47161500 0.19423500 2.10069900  
H 1.36759800 -1.56570600 2.13747600  
H -4.66858000 1.50525000 -0.60847400  
H -3.16247900 1.98079500 0.18796400  
H -3.21502000 1.82216300 -1.57574300  
H -4.98457100 -0.72509300 -1.60381900  
H -3.69806300 -1.94253700 -1.58439400  
H -3.55817300 -0.51657100 -2.63244300  
H -3.50121600 -1.69239800 0.95973300  
H -3.21798600 -0.08439000 1.66970700  
H -4.77692900 -0.47396000 0.93424100  
C 2.03807600 -0.76812400 0.26728700  
C 3.47977900 -1.16736700 0.58207500  
H 1.62019300 -1.51713400 -0.43021200  
C 2.70227600 0.51834900 -1.60860500  
C 4.33423800 -1.14128300 -0.68868100  
H 3.88311000 -0.46402700 1.32299900  
H 3.48741500 -2.16599100 1.03273100  
C 4.17849700 0.20000100 -1.40995000  
H 2.55669600 1.51855700 -2.02468100  
H 2.24388700 -0.21032800 -2.29757500  
H 5.38499600 -1.33051200 -0.44566400  
H 4.00834600 -1.95039600 -1.35653000  
H 4.68171500 0.18256800 -2.38317600  
H 4.63659500 0.99979900 -0.81442200  
O 2.00195000 0.50267400 -0.37318900  
C -0.34445200 -0.66131800 1.28851700  
H -0.84761200 -0.63290000 2.26192200

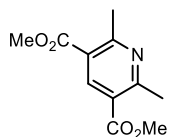

O 1  
C 0.00000000 -0.10745000 -0.00008100  
C -1.19595300 0.60602900 0.00001300  
C -1.14186500 2.00159600 0.00013100  
N 0.00000100 2.69295000 0.00017700

C 1.14186600 2.00159600 0.00012100  
 C 1.19595400 0.60602900 0.00000100  
 C -2.53076400 -0.05858100 -0.00001600  
 C 2.53076400 -0.05858200 -0.00004300  
 O 2.43556500 -1.38657800 -0.00002000  
 O 3.58560000 0.54476200 -0.00008600  
 C 3.67108500 -2.11856900 -0.00007400  
 O -3.58560000 0.54476300 -0.00004700  
 O -2.43556600 -1.38657800 0.00000300  
 C -3.67108600 -2.11856900 -0.00003800  
 H 0.00000000 -1.19112200 -0.00013600  
 H -2.06267800 2.57744400 0.00020900  
 H 2.06267900 2.57744400 0.00018800  
 H 3.38422900 -3.16893000 -0.00013800  
 H 4.25157000 -1.88206600 -0.89423000  
 H 4.25157200 -1.88218000 0.89411300  
 H -3.38423100 -3.16893000 -0.00011100  
 H -4.25156100 -1.88218300 0.89415700  
 H -4.25158400 -1.88206200 -0.89418500

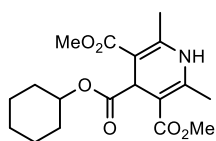

O 1  
 C 4.28436500 0.58253300 -1.18362900  
 C 5.13433700 -0.31630200 -0.28069500  
 C 4.44853800 -1.66410600 -0.03681100  
 C 3.03535300 -1.47950900 0.52745300  
 C 2.21169500 -0.59081100 -0.39194600  
 C 2.87238300 0.76503300 -0.61662200  
 O 0.92408000 -0.40517300 0.24186700  
 C -0.12206200 -0.13250700 -0.52765100  
 C -1.39158200 0.15329400 0.28770400  
 O -0.09371300 -0.09844200 -1.74320200  
 C -2.50308200 -0.80902500 -0.10653600  
 C -3.59704800 -0.40933100 -0.78833500  
 N -3.81524200 0.89960100 -1.11414100  
 C -2.97096000 1.87201700 -0.65740800  
 C -1.84786600 1.58492700 0.03380400  
 C -2.40294600 -2.24070000 0.21552800  
 C -1.03897200 2.72408600 0.49560600  
 O 0.04343300 2.31593200 1.16999100

O -1.29248300 3.90247200 0.29833100  
C 0.94369600 3.33041800 1.62383100  
O -3.23855800 -3.09042900 -0.05163500  
O -1.25674700 -2.52263700 0.84951000  
C -1.03601000 -3.89198000 1.20257200  
H 4.76016200 1.56122600 -1.30737900  
H 4.21735200 0.13339900 -2.18396000  
H 6.12309100 -0.47224000 -0.72635700  
H 5.29316700 0.18730800 0.68299100  
H 5.04129700 -2.27617100 0.65126800  
H 4.39041200 -2.21713300 -0.98430700  
H 2.53658800 -2.44706000 0.64728100  
H 3.08956600 -1.00940500 1.51824500  
H 2.04939500 -1.09144800 -1.35215900  
H 2.25857300 1.37053200 -1.29107800  
H 2.92243900 1.28900300 0.34675500  
H -1.13061500 0.02072800 1.34105200  
H -4.36319300 -1.11273200 -1.09181300  
H -4.65703000 1.15900200 -1.60655900  
H -3.26185100 2.89527800 -0.86309500  
H 1.72296800 2.80393000 2.17365400  
H 1.37535600 3.86436200 0.77367800  
H 0.43029500 4.03635800 2.28077600  
H -0.06718200 -3.91114200 1.70028300  
H -1.81640900 -4.24390800 1.88137000  
H -1.01481300 -4.51910600 0.30823700

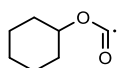

0 2

C -1.71638200 1.38531400 0.20979000  
C -2.62598400 0.22954300 -0.21698800  
C -2.08131000 -1.11432100 0.27579400  
C -0.63854600 -1.33989600 -0.19272000  
C 0.23638700 -0.17958400 0.24655700  
C -0.27417500 1.16019500 -0.25975900  
O 1.57760400 -0.43560700 -0.29878900  
C 2.57675100 0.17057400 0.29258800  
O 3.73380600 0.12634400 -0.00012700  
H -2.08573800 2.33431900 -0.19198000  
H -1.73158300 1.47537500 1.30437600  
H -3.63972300 0.38737900 0.16691900  
H -2.69687800 0.21101300 -1.31308400  
H -2.71034800 -1.93703600 -0.07898600

H -2.11402900 -1.13908400 1.37347800  
H -0.24104300 -2.27710800 0.20972300  
H -0.61059000 -1.40730800 -1.28788500  
H 0.33243400 -0.16624000 1.33763000  
H 0.38049300 1.96392900 0.09625600  
H -0.23472500 1.15790500 -1.35668200

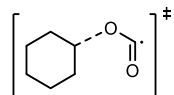

O 2  
O 1.47178600 -0.92166900 -0.17420700  
C 2.23810500 0.02631100 -0.14439700  
O 3.27934600 0.46426700 -0.56443800  
C -0.17998400 -0.65985200 1.02151900  
C -1.17117400 -1.43151300 0.22906400  
H 0.28351100 -1.18792600 1.85102500  
C -0.92185700 1.52461200 -0.03165300  
C -1.79378400 -0.64832600 -0.92862100  
H -0.71544200 -2.37034000 -0.10749500  
H -1.95800600 -1.72470600 0.94372500  
C -2.16962100 0.76866300 -0.49115600  
H -1.17272300 2.54277400 0.28113300  
H -0.23562500 1.61523600 -0.88320600  
H -1.07726200 -0.58977300 -1.75709900  
H -2.67027200 -1.18866100 -1.29992500  
H -2.64642600 1.30564100 -1.31787400  
H -2.90226900 0.72107100 0.32677500  
C -0.19772900 0.80708100 1.11443600  
H -0.60644500 1.07912200 2.09774500  
H 0.86815800 1.13491300 1.15920700

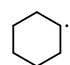

O 2  
C 0.04956700 -0.74956700 1.26377200  
C 0.04956700 0.78863900 1.28590000  
C 0.54675100 1.36652900 0.00000000  
C 0.04956700 0.78863900 -1.28590000  
C 0.04956700 -0.74956700 -1.26377200  
C -0.62750000 -1.28757000 0.00000000  
H -0.99021600 1.12570100 1.45919300  
H 0.63485800 1.16205700 2.13349400  
H 1.08655600 -1.10999700 1.29552300

H -0.45153900 -1.13390200 2.15954000  
 H -0.99021600 1.12570100 -1.45919300  
 H 0.63485800 1.16205700 -2.13349400  
 H -0.45153900 -1.13390200 -2.15954000  
 H 1.08655600 -1.10999700 -1.29552300  
 H -1.68568400 -0.98830900 0.00000000  
 H -0.60719100 -2.38353100 0.00000000  
 H 1.02844600 2.34150600 0.00000000

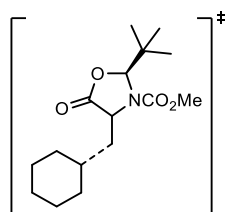

O 2

N 0.71623200 0.22365500 -0.33803700  
 C 1.62288200 -0.37907600 0.64870700  
 O 1.06852800 -1.68542000 0.84267600  
 C 0.17400500 -1.98693200 -0.12809200  
 C -0.08214400 -0.77792600 -0.91845500  
 C 0.51570300 1.56920000 -0.49497400  
 O 1.08442600 2.26147200 0.49820800  
 O -0.10719400 2.06727400 -1.41636200  
 C 1.05524600 3.68756000 0.36806400  
 C -1.02552200 -0.69777200 -1.88804900  
 O -0.30436500 -3.09360200 -0.23779000  
 C 3.09472200 -0.50982300 0.18810300  
 C 3.71149300 0.88131800 -0.00982100  
 C 3.85832900 -1.24305100 1.30101900  
 C 3.19019600 -1.29885900 -1.12386300  
 H 1.56131300 0.15463400 1.59893000  
 H 1.56261600 3.99799600 -0.54829000  
 H 0.02543300 4.05084400 0.36664000  
 H 1.58743900 4.06590200 1.23986100  
 H -1.11830500 0.18002000 -2.51102600  
 H -1.46898400 -1.63060000 -2.21561100  
 H 4.77381700 0.76806100 -0.24953300  
 H 3.24324100 1.42312100 -0.83770300  
 H 3.62899200 1.49314000 0.89369500  
 H 4.91776200 -1.31589700 1.03495700  
 H 3.47556100 -2.25654200 1.45115300  
 H 3.78662500 -0.70280000 2.25220100  
 H 2.80134000 -2.31706500 -1.02063400  
 H 2.65062400 -0.79873100 -1.93501900

H 4.24033300 -1.37790100 -1.42291400  
C -3.23755900 -0.17934600 -1.07096900  
C -3.64070200 -1.30826500 -0.16811200  
C -3.22551000 1.21189800 -0.51107800  
H -3.54944100 -0.26952000 -2.11064900  
C -3.09924600 -1.17136300 1.26018700  
H -3.34694500 -2.27080300 -0.60253600  
H -4.74495100 -1.32362700 -0.11956800  
C -2.68334800 1.28284200 0.92082400  
H -2.66233500 1.88224100 -1.16886300  
H -4.26638500 1.58387100 -0.50570200  
C -3.33858700 0.23237300 1.81945100  
H -2.02126700 -1.37251500 1.26583300  
H -3.56287800 -1.92847600 1.90208200  
H -2.83615100 2.29020100 1.32378100  
H -1.60085600 1.10442200 0.91354600  
H -2.94183400 0.30492100 2.83848200  
H -4.41931100 0.42505900 1.88164000

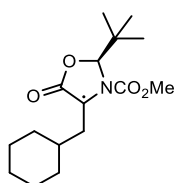

0 2

N -0.91612900 0.22757900 0.01825700  
C -2.04951300 -0.40875800 -0.68463400  
O -1.57971200 -1.73412000 -0.90728300  
C -0.46689900 -1.98077000 -0.14873600  
C -0.03867700 -0.74777800 0.44889100  
C -0.72433600 1.59519400 0.10689400  
O -1.46043600 2.22870300 -0.80552800  
O 0.01923900 2.13485200 0.90179800  
C -1.48849800 3.65980300 -0.71114700  
C 1.21145700 -0.56000200 1.22462800  
O 0.01855400 -3.09590800 -0.07514300  
C -3.36940100 -0.45150500 0.12779400  
C -3.89805000 0.96688200 0.38159100  
C -4.39168300 -1.21903900 -0.72452300  
C -3.16466000 -1.16387200 1.47050700  
H -2.20628500 0.06944000 -1.65347700  
H -1.87191800 3.96774700 0.26417400  
H -0.49000700 4.07211500 -0.86843700  
H -2.16186000 3.98557200 -1.50241200

H 1.01904800 0.09745400 2.07751400  
H 1.49148900 -1.54682800 1.61081700  
H -4.88193400 0.89678200 0.85657900  
H -3.25049700 1.53336900 1.05882700  
H -4.00846400 1.53260400 -0.54846800  
H -5.35467500 -1.24887000 -0.20478000  
H -4.07142200 -2.24879000 -0.90611500  
H -4.54662700 -0.72944600 -1.69298200  
H -2.83431100 -2.19912500 1.34004600  
H -2.43645500 -0.64029500 2.09922500  
H -4.11430200 -1.18746500 2.01463800  
C 2.39650400 0.00801000 0.41052400  
C 3.60405700 0.21643500 1.33232100  
C 2.77243200 -0.88576000 -0.77746600  
H 2.09943600 0.99048700 0.01997500  
C 4.81285900 0.76916700 0.57243500  
H 3.87212900 -0.74810400 1.78885600  
H 3.33064700 0.89220200 2.15194800  
C 3.97904700 -0.33194700 -1.54100200  
H 3.00594400 -1.89393000 -0.40588700  
H 1.91886200 -0.99094300 -1.45828600  
C 5.18073400 -0.12389700 -0.61550900  
H 5.66707600 0.87071600 1.25174800  
H 4.57656900 1.77805600 0.20588100  
H 4.24335000 -1.00839500 -2.36190800  
H 3.70562900 0.62996400 -1.99763900  
H 6.01828300 0.31160500 -1.17273200  
H 5.51981300 -1.10017200 -0.24106100

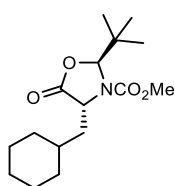

O 1  
N -0.84741600 0.26438200 0.41579000  
C -1.65288000 -0.36399200 -0.62960400  
O -1.17364400 -1.71760600 -0.63273200  
C -0.44708400 -1.99270600 0.46149900  
C -0.63136800 1.60078200 0.53944300  
O -0.98217400 2.25908700 -0.57507500  
O -0.16275400 2.13567000 1.53238500  
C -0.95756000 3.68781900 -0.49804500  
C 1.27906300 -0.50288500 1.58714500



O -0.06290100 -3.10631500 0.71697300  
C -3.18157000 -0.37553600 -0.38510700  
C -3.73424800 1.05546300 -0.43181200  
C -3.82458300 -1.19552000 -1.51393600  
C -3.51331600 -1.00088200 0.97582000  
H -1.42406400 0.06727500 -1.60700400  
H -1.61751700 4.04143100 0.29778100  
H 0.05907200 4.04698400 -0.32456300  
H -1.31852700 4.03438900 -1.46575900  
H 1.33358100 0.22789700 2.39734500  
H 1.64854900 -1.45479100 1.98837000  
H -4.82559000 1.01776900 -0.35146700  
H -3.36457000 1.66596000 0.39777600  
H -3.47860900 1.55841800 -1.36951700  
H -4.91395000 -1.18035500 -1.40653900  
H -3.49620400 -2.23847700 -1.49265500  
H -3.57805900 -0.77715600 -2.49680400  
H -3.16824300 -2.03761100 1.04959000  
H -3.07581100 -0.42486900 1.79826400  
H -4.59863100 -1.00818600 1.11832500  
C 2.18964500 -0.03632200 0.44457500  
C 3.58726500 0.26127200 1.00979700  
C 2.29002900 -1.02587900 -0.72477600  
H 1.79687700 0.90947600 0.04484300  
C 4.55722700 0.75099200 -0.06774000  
H 3.98678500 -0.65653300 1.46635900  
H 3.50701900 1.00591000 1.81111900  
C 3.26181200 -0.53712900 -1.80392700  
H 2.62528900 -2.00047400 -0.34215300  
H 1.30823200 -1.18455200 -1.18380800  
C 4.64800900 -0.24408200 -1.22680600  
H 5.54801700 0.91898100 0.36995700  
H 4.21022100 1.72100100 -0.45101900  
H 3.33134600 -1.28237900 -2.60452700  
H 2.86009000 0.38001200 -2.25787300  
H 5.31133600 0.14191500 -2.00951300  
H 5.09349900 -1.18118500 -0.86396800  
C -0.20867100 -0.72777500 1.26806400  
H -0.74706400 -0.84992300 2.21694800

## 10. References

1. Wei, Y.; Ben-Zvi, B.; Diao, T. Diastereoselective Synthesis of Aryl C-Glycosides from Glycosyl Esters via C-O Bond Homolysis. *Angew. Chem. Int. Ed.* **2021**, *60* (17), 9433-9438.
2. Petracca, R.; Bowen, K. A.; Mcsweeney, L.; O'Flaherty, S.; Genna, V.; Twamley, B.; Devocelle, M.; Scanlan, E. M. Chemoselective Synthesis of N-Terminal Cysteinyll Thioesters via  $\beta,\gamma$ -C,S Thiol-Michael Addition. *Org. Lett.* **2019**, *21* (9), 3281-3285.
3. Sim, J.; Campbell, M. W.; Molander, G. A. Synthesis of  $\alpha$ -Fluoro- $\alpha$ -amino Acid Derivatives via Photoredox-Catalyzed Carbofluorination. *ACS Catal.* **2019**, *9* (2), 1558-1563.
4. Ji, P.; Zhang, Y.; Dong, Y.; Huang, H.; Wei, Y.; Wang, W. Synthesis of Enantioenriched  $\alpha$ -Deuterated  $\alpha$ -Amino Acids Enabled by an Organophotocatalytic Radical Approach. *Org. Lett.* **2020**, *22* (4), 1557-1562.
5. Wei, Y.; Lam, J.; Diao, T. Synthesis of C-Acyl Furanosides via the Cross-Coupling of Glycosyl Esters with Carboxylic Acids. *Chem. Sci.* **2021**, *12* (34), 11414-11419.
6. Nugent, W. A.; Feaster, J. E. Practical Synthesis of Methyl Z-2-(N-Acetyl-amino) but-2-Enoate. An Intermediate to D- and L-2-Aminobutyric Acid. *Synth. Commun.* **1998**, *28* (9), 1617-1623.
7. Chang, M.-Y.; Chen, S.-T.; Chang, N.-C. A Synthesis of Racemic Thalidomide. *Synth. Commun.* **2003**, *33* (8), 1375-1382.
8. Besset, T.; Kuhl, N.; Patureau, F. W.; Glorius, F. Rh<sup>III</sup>-Catalyzed Oxidative Olefination of Vinylic C-H Bonds: Efficient and Selective Access to Di-unsaturated  $\alpha$ -Amino Acid Derivatives and Other Linear 1,3-Butadienes. *Chem. Eur. J.* **2011**, *17* (26), 7167-7171.
9. Gonzalez, C.; Kavooosi, S.; Sanchez, A.; Wnuk, S. F. Reduction of Sugar Lactones to Hemiacetals with Lithium Triethylborohydride. *Carbohydr. Res.* **2016**, *432*, 17-22.
10. Verdagner, X.; Hansen, M. C.; Berk, S. C.; Buchwald, S. L. Titanocene-Catalyzed Reduction of Lactones to Lactols. *J. Org. Chem.* **1997**, *62* (24), 8522-8528.
11. Yu, C.-S.; Wang, H.-Y.; Chiang, L.-W.; Pei, K. Synthesis of the Rhamnosyl Trisaccharide Repeating Unit To Mimic the Antigen Determinant of Pseudomonas syringae Lipopolysaccharide. *Synthesis* **2007**, *2007* (09), 1412-1420.
12. Huang, X.; Huang, L.; Wang, H.; Ye, X.-S. Iterative One-Pot Synthesis of Oligosaccharides. *Angew. Chem. Int. Ed.* **2004**, *43* (39), 5221-5224.
13. Yin, Z.-J.; Wang, B.; Li, Y.-B.; Meng, X.-B.; Li, Z.-J. Highly Efficient and Mild Method for Regioselective De-O-benzylation of Saccharides by Co<sub>2</sub>(CO)<sub>8</sub>-Et<sub>3</sub>SiH-CO Reagent System. *Org. Lett.* **2010**, *12* (3), 536-539.
14. Dasgupta, S.; Rajput, V. K.; Roy, B.; Mukhopadhyay, B. Lanthanum Trifluoromethane-sulfonate-Catalyzed Facile Synthesis of Per-O-acetylated Sugars and Their One-Pot Conversion to S-Aryl and O-Alkyl/Aryl Glycosides. *J. Carbohydr. Chem.* **2007**, *26* (2), 91-106.
15. Furukawa, T.; Akutagawa, T.; Funatani, H.; Uchida, T.; Hotta, Y.; Niwa, M.; Takaya, Y. Cyclic Dipeptides Exhibit Potency for Scavenging Radicals. *Bioorg. Med. Chem.* **2012**, *20* (6), 2002-2009.
16. Sakurai, M.; Sugano, M.; Handa, H.; Komai, T.; Yagi, R.; Nishigaki, T.; Yabe, Y. Studies of HIV-1 Protease Inhibitors. I. Incorporation of a Reduced Peptide, Simple Aminoalcohol, and Statine Analog at the Scissile Site Substrate Sequences. *Chemical & Pharmaceutical Bulletin* **1993**, *41* (8), 1369-1377.
17. Katritzky, A.; Bol'Shakov, O.; Lebedyeva, I. 17 $\alpha$ -Ethinylestradiol Peptide Labeling by 'Click' Chemistry. *Synthesis* **2012**, *44* (18), 2926-2932.

18. Yin, H.; Zheng, M.; Chen, H.; Wang, S.; Zhou, Q.; Zhang, Q.; Wang, P. Stereoselective and Divergent Construction of  $\beta$ -Thiolated/Selenolated Amino Acids via Photoredox-Catalyzed Asymmetric Giese Reaction. *J. Am. Chem. Soc.* **2020**, *142* (33), 14201-14209.
19. Jiang, Y.; Wang, Q.; Zhang, X.; Koh, M. J. Synthesis of C-glycosides by Ti-Catalyzed Stereoselective Glycosyl Radical Functionalization. *Chem* **2021**, *7* (12), 3377-3392.
20. Gaussian 09, R. B., M. J. Frisch, G. W. Trucks, H. B. Schlegel, G. E. Scuseria, M. A. Robb, J. R. Cheeseman, G. Scalmani, V. Barone, B. Mennucci, G. A. Petersson, H. Nakatsuji, M. Caricato, X. Li, H. P. Hratchian, A. F. Izmaylov, J. Bloino, G. Zheng, J. L. Sonnenberg, M. Hada, M. Ehara, K. Toyota, R. Fukuda, J. Hasegawa, M. Ishida, T. Nakajima, Y. Honda, O. Kitao, H. Nakai, T. Vreven, J. A. Montgomery, Jr., J. E. Peralta, F. Ogliaro, M. Bearpark, J. J. Heyd, E. Brothers, K. N. Kudin, V. N. Staroverov, T. Keith, R. Kobayashi, J. Normand, K. Raghavachari, A. Rendell, J. C. Burant, S. S. Iyengar, J. Tomasi, M. Cossi, N. Rega, J. M. Millam, M. Klene, J. E. Knox, J. B. Cross, V. Bakken, C. Adamo, J. Jaramillo, R. Gomperts, R. E. Stratmann, O. Yazyev, A. J. Austin, R. Cammi, C. Pomelli, J. W. Ochterski, R. L. Martin, K. Morokuma, V. G. Zakrzewski, G. A. Voth, P. Salvador, J. J. Dannenberg, S. Dapprich, A. D. Daniels, O. Farkas, J. B. Foresman, J. V. Ortiz, J. Cioslowski, and D. J. Fox, Gaussian, Inc., Wallingford CT, 2010.
21. Gaussian 16, R. A., M. J. Frisch, G. W. Trucks, H. B. Schlegel, G. E. Scuseria, M. A. Robb, J. R. Cheeseman, G. Scalmani, V. Barone, G. A. Petersson, H. Nakatsuji, X. Li, M. Caricato, A. V. Marenich, J. Bloino, B. G. Janesko, R. Gomperts, B. Mennucci, H. P. Hratchian, J. V. Ortiz, A. F. Izmaylov, J. L. Sonnenberg, D. Williams-Young, F. Ding, F. Lipparini, F. Egidi, J. Goings, B. Peng, A. Petrone, T. Henderson, D. Ranasinghe, V. G. Zakrzewski, J. Gao, N. Rega, G. Zheng, W. Liang, M. Hada, M. Ehara, K. Toyota, R. Fukuda, J. Hasegawa, M. Ishida, T. Nakajima, Y. Honda, O. Kitao, H. Nakai, T. Vreven, K. Throssell, J. A. Montgomery, Jr., J. E. Peralta, F. Ogliaro, M. J. Bearpark, J. J. Heyd, E. N. Brothers, K. N. Kudin, V. N. Staroverov, T. A. Keith, R. Kobayashi, J. Normand, K. Raghavachari, A. P. Rendell, J. C. Burant, S. S. Iyengar, J. Tomasi, M. Cossi, J. M. Millam, M. Klene, C. Adamo, R. Cammi, J. W. Ochterski, R. L. Martin, K. Morokuma, O. Farkas, J. B. Foresman, and D. J. Fox, Gaussian, Inc., Wallingford CT, 2016.
22. Marenich, A. V.; Cramer, C. J.; Truhlar, D. G. Universal Solvation Model Based on Solute Electron Density and on a Continuum Model of the Solvent Defined by the Bulk Dielectric Constant and Atomic Surface Tensions. *J. Phys. Chem. B* **2009**, *113* (18), 6378-6396.

## 11. Copies of 1D and 2D NMR spectra

7.39  
7.38  
7.38  
7.37  
7.37  
7.36  
7.36  
7.35  
7.35  
7.34  
7.33  
5.54  
5.22  
5.21  
4.78  
4.77  
4.77  
4.76  
4.57  
4.56  
4.55  
4.54  
4.51  
4.50  
4.49  
4.48  
4.43  
4.42  
4.41  
4.41  
4.40  
4.40  
4.39  
4.38  
4.11  
4.10  
4.09  
4.08  
4.06  
4.05  
4.04  
4.03  
3.85  
3.84  
3.83  
3.82  
2.00  
1.98  
1.97  
1.96  
1.96  
1.95  
1.94  
1.93  
1.50  
1.44  
1.38  
1.33  
0.94

**19a** (<sup>1</sup>H NMR, 400MHz, CDCl<sub>3</sub>)

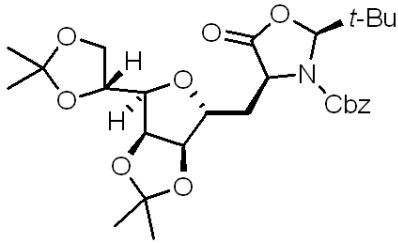

**19a**

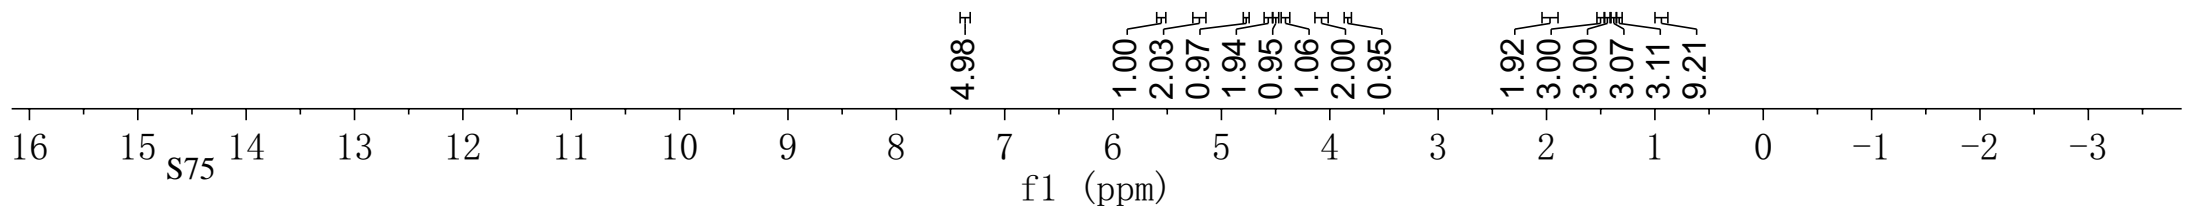

**19a** (<sup>13</sup>C NMR, 101MHz, CDCl<sub>3</sub>)

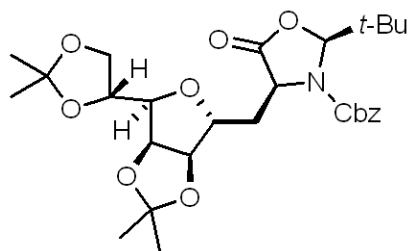

**19a**

—172.22

—155.79

—135.69

128.76

128.72

—112.89

—109.27

—96.43

85.09

80.70

80.55

80.49

77.16

73.40

68.39

67.10

—53.99

37.17

33.85

27.02

26.21

25.32

24.93

24.80

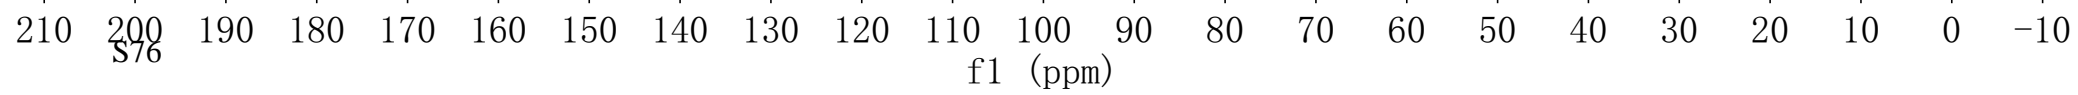

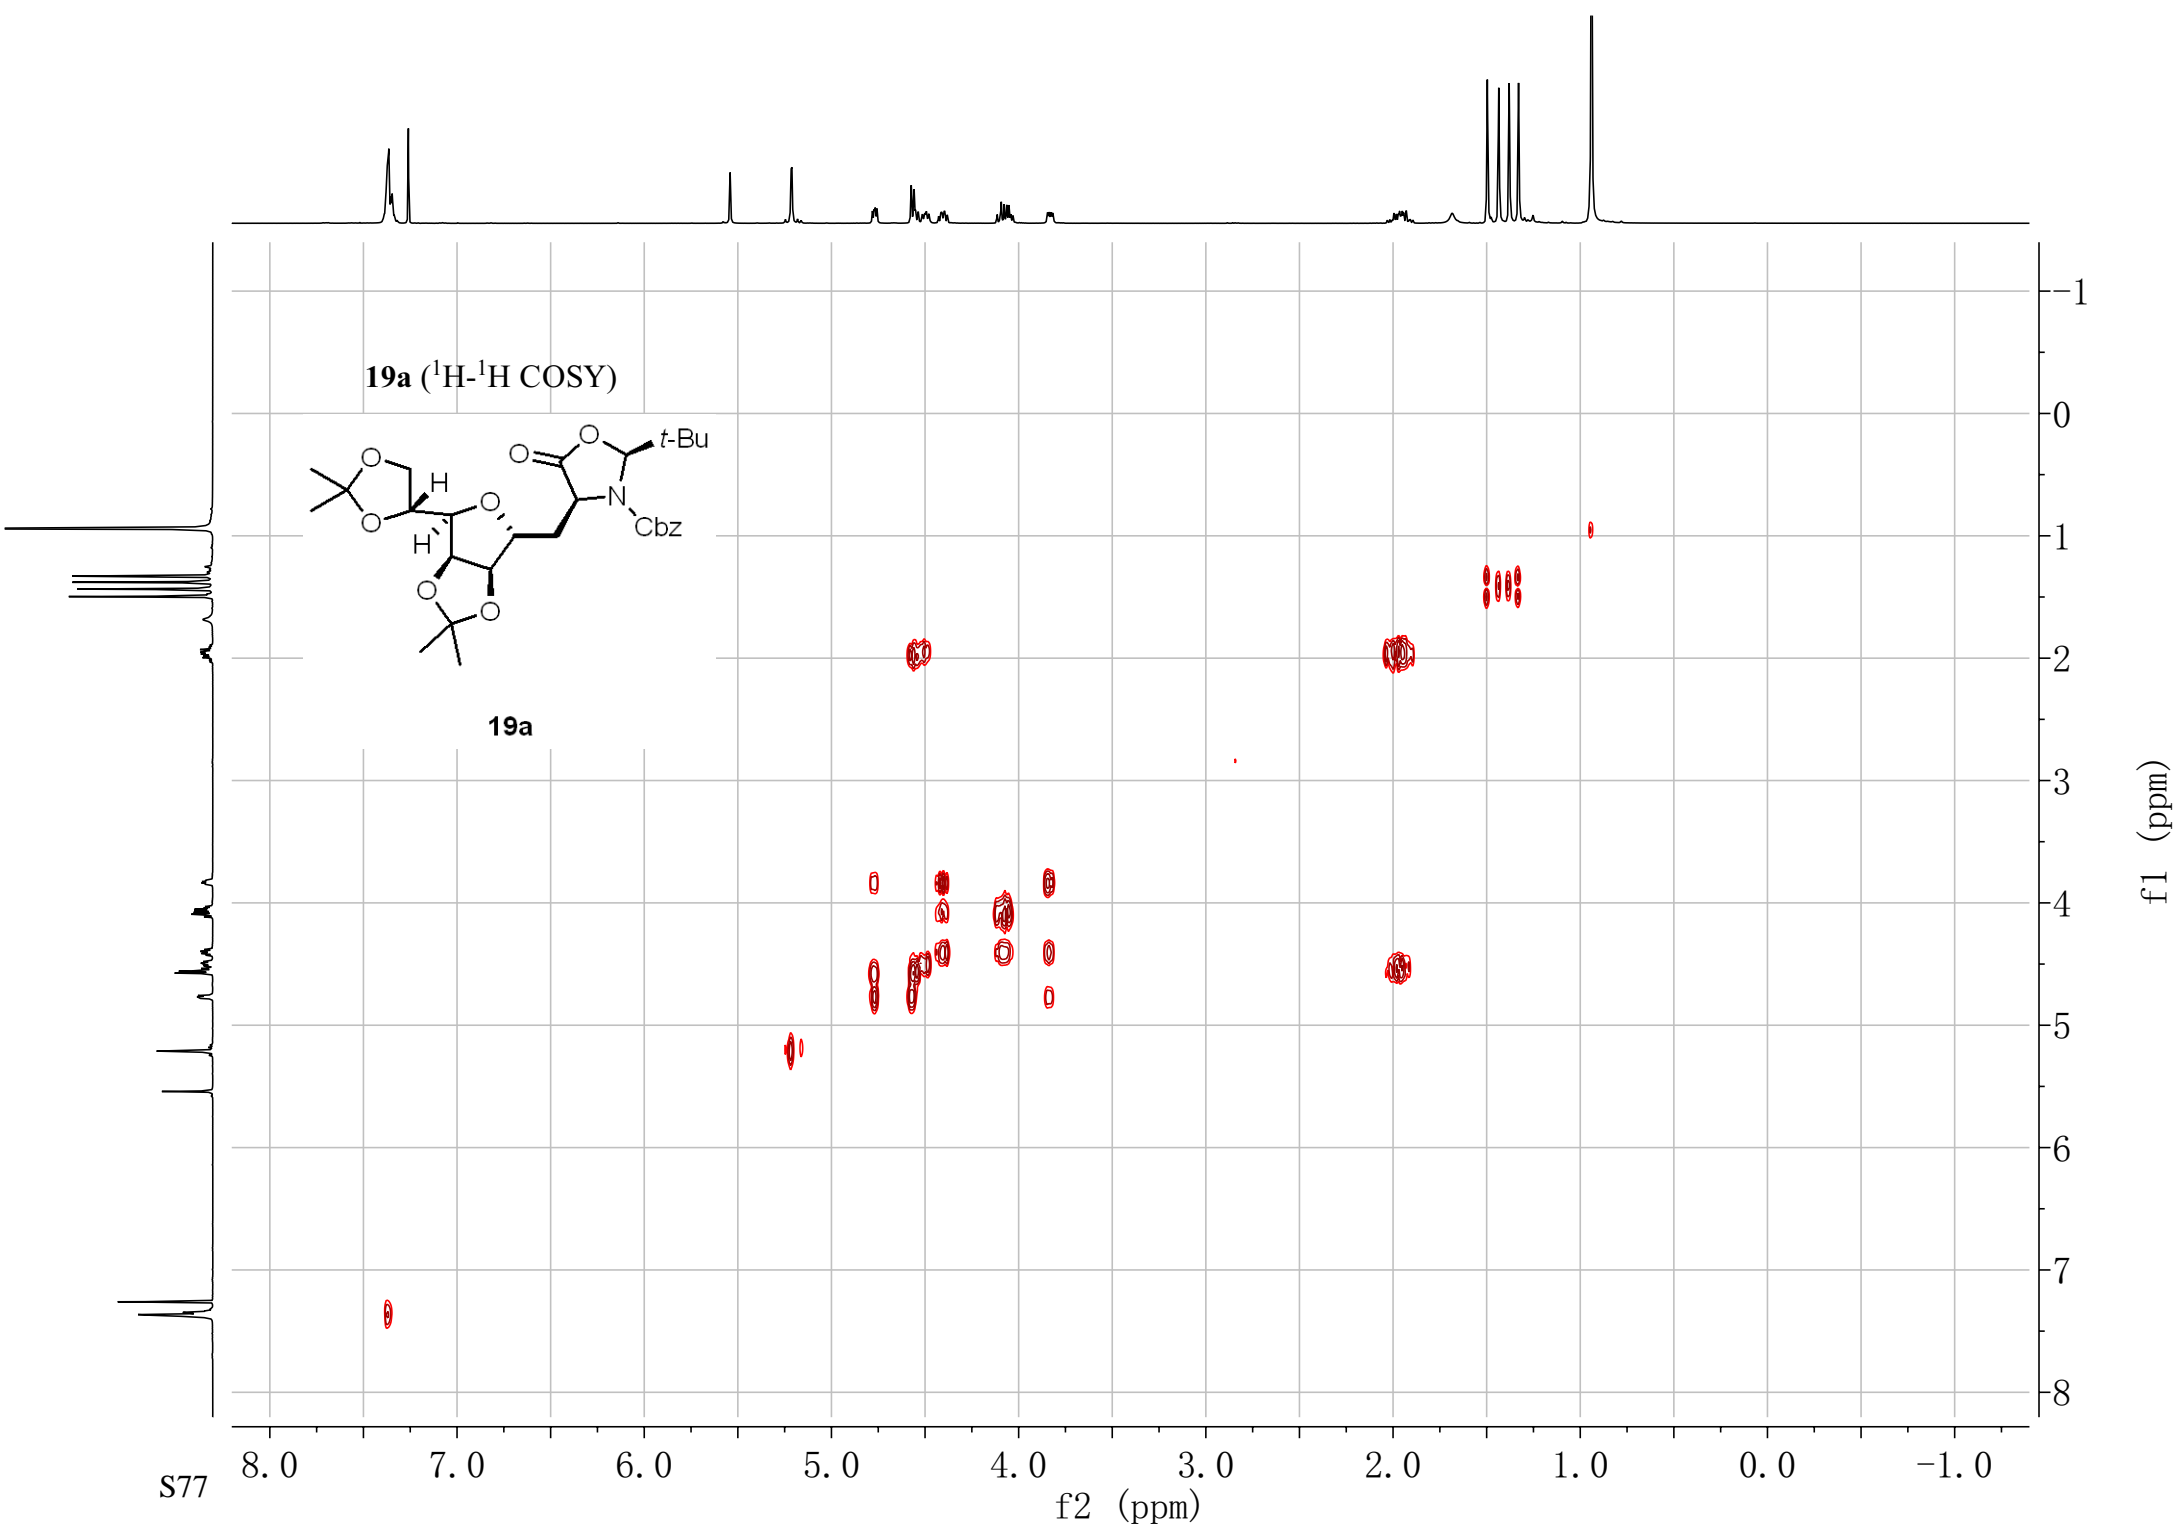



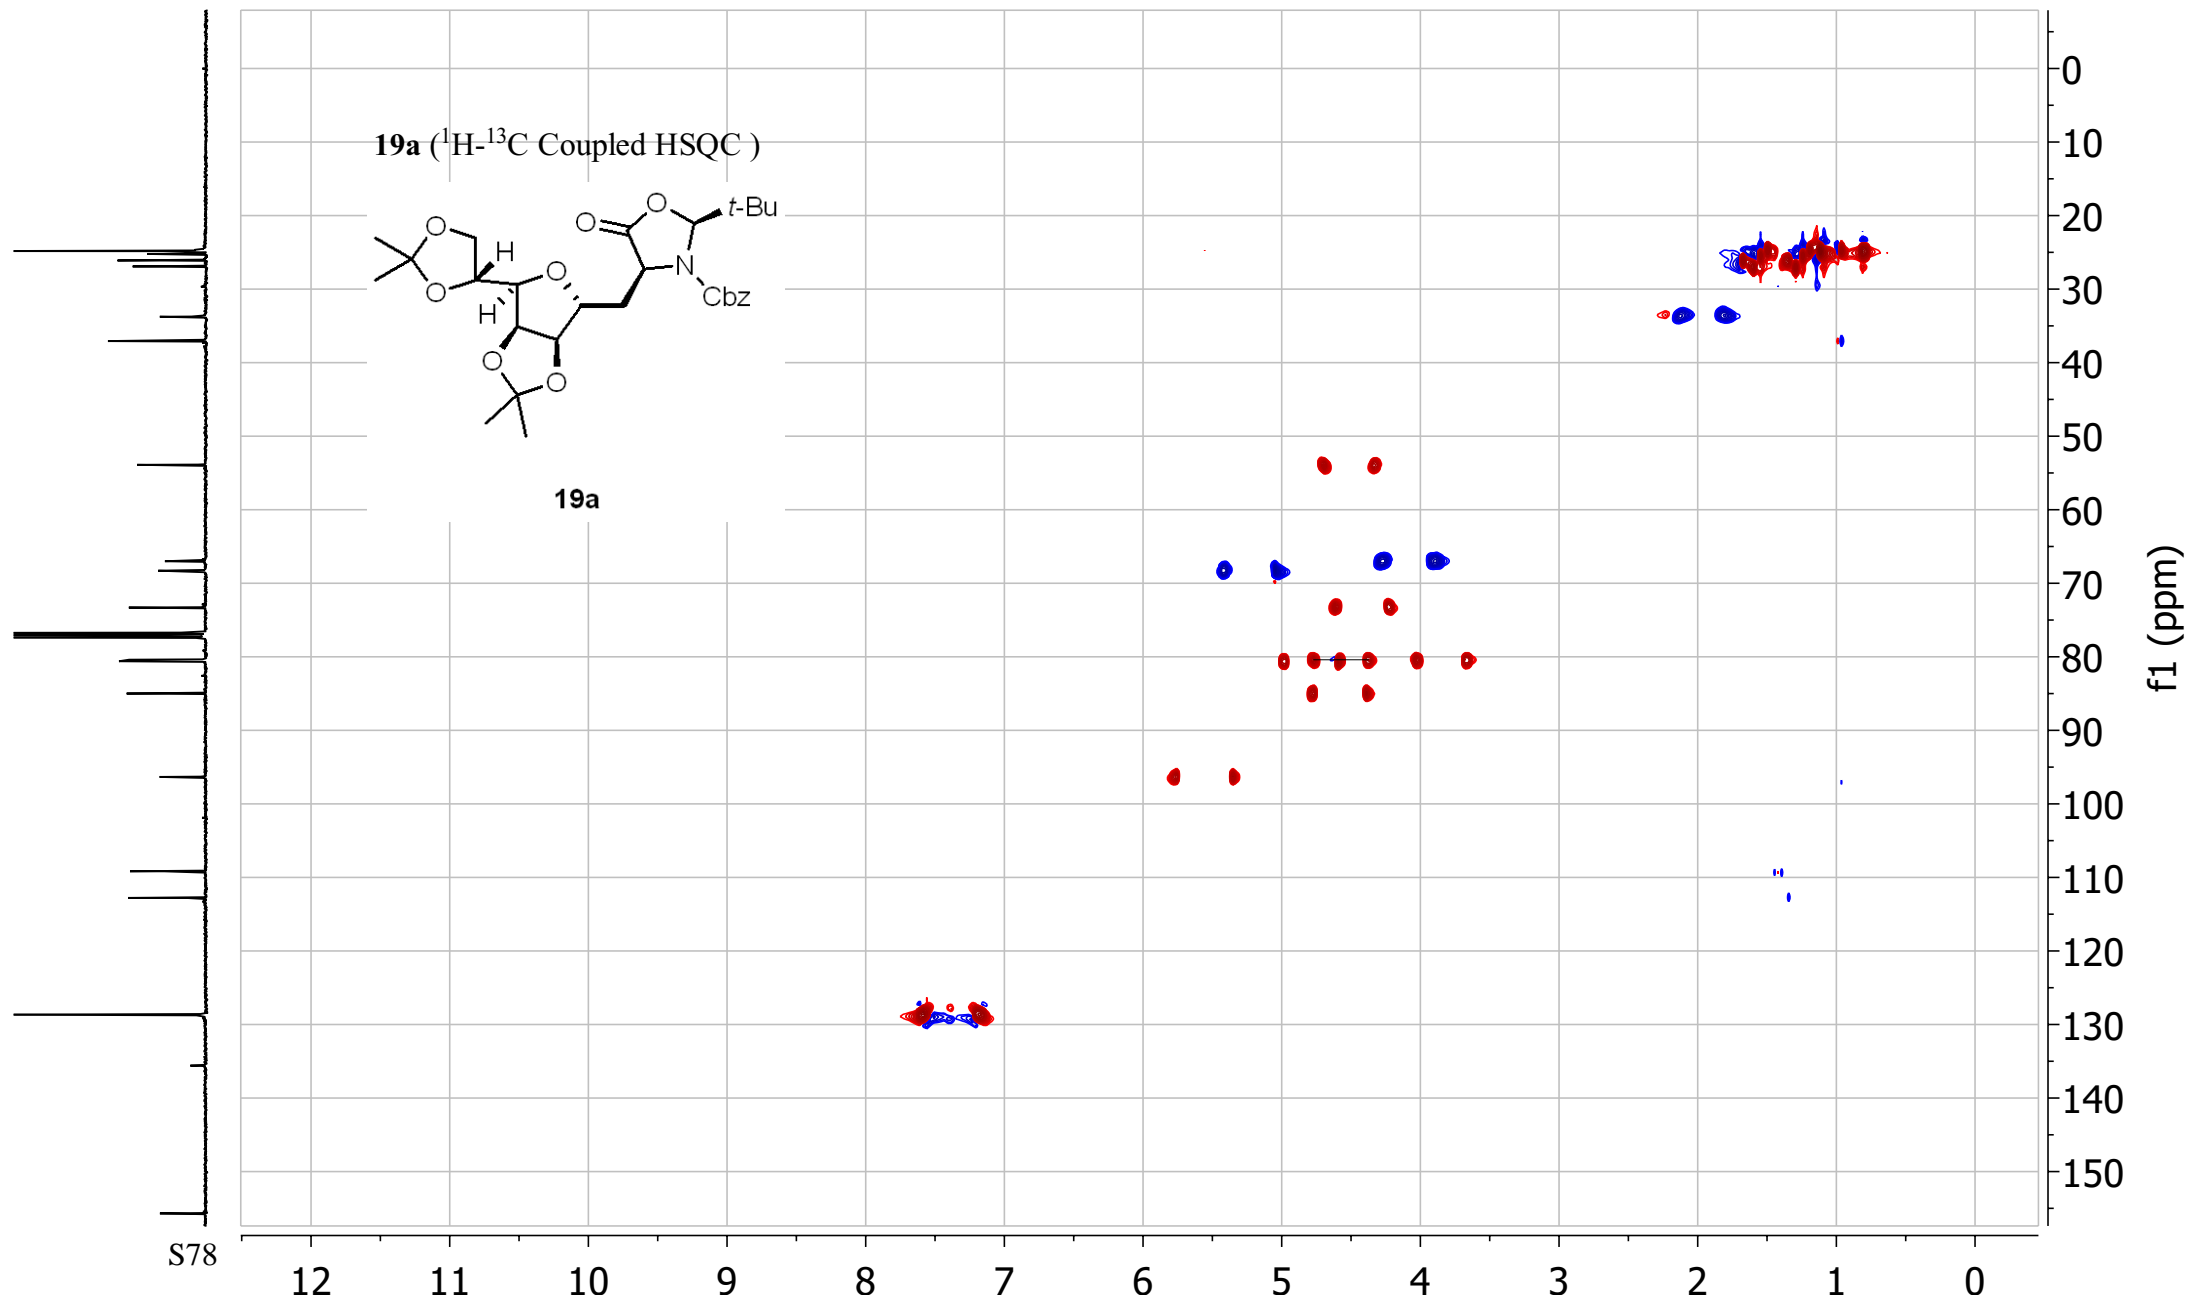

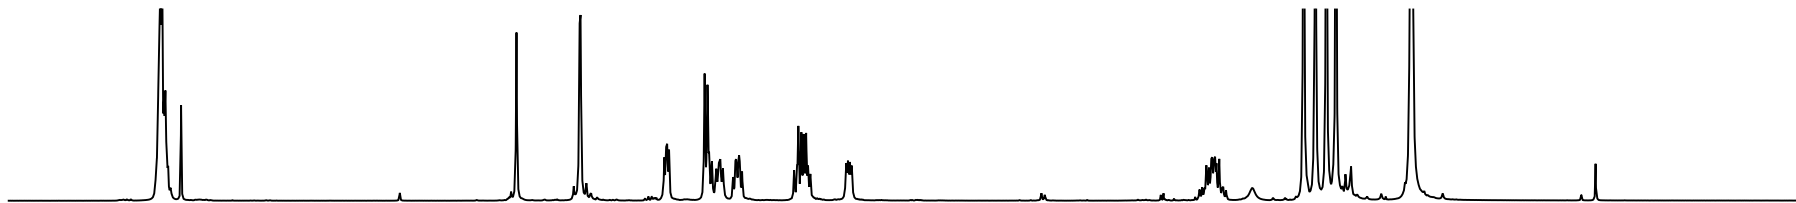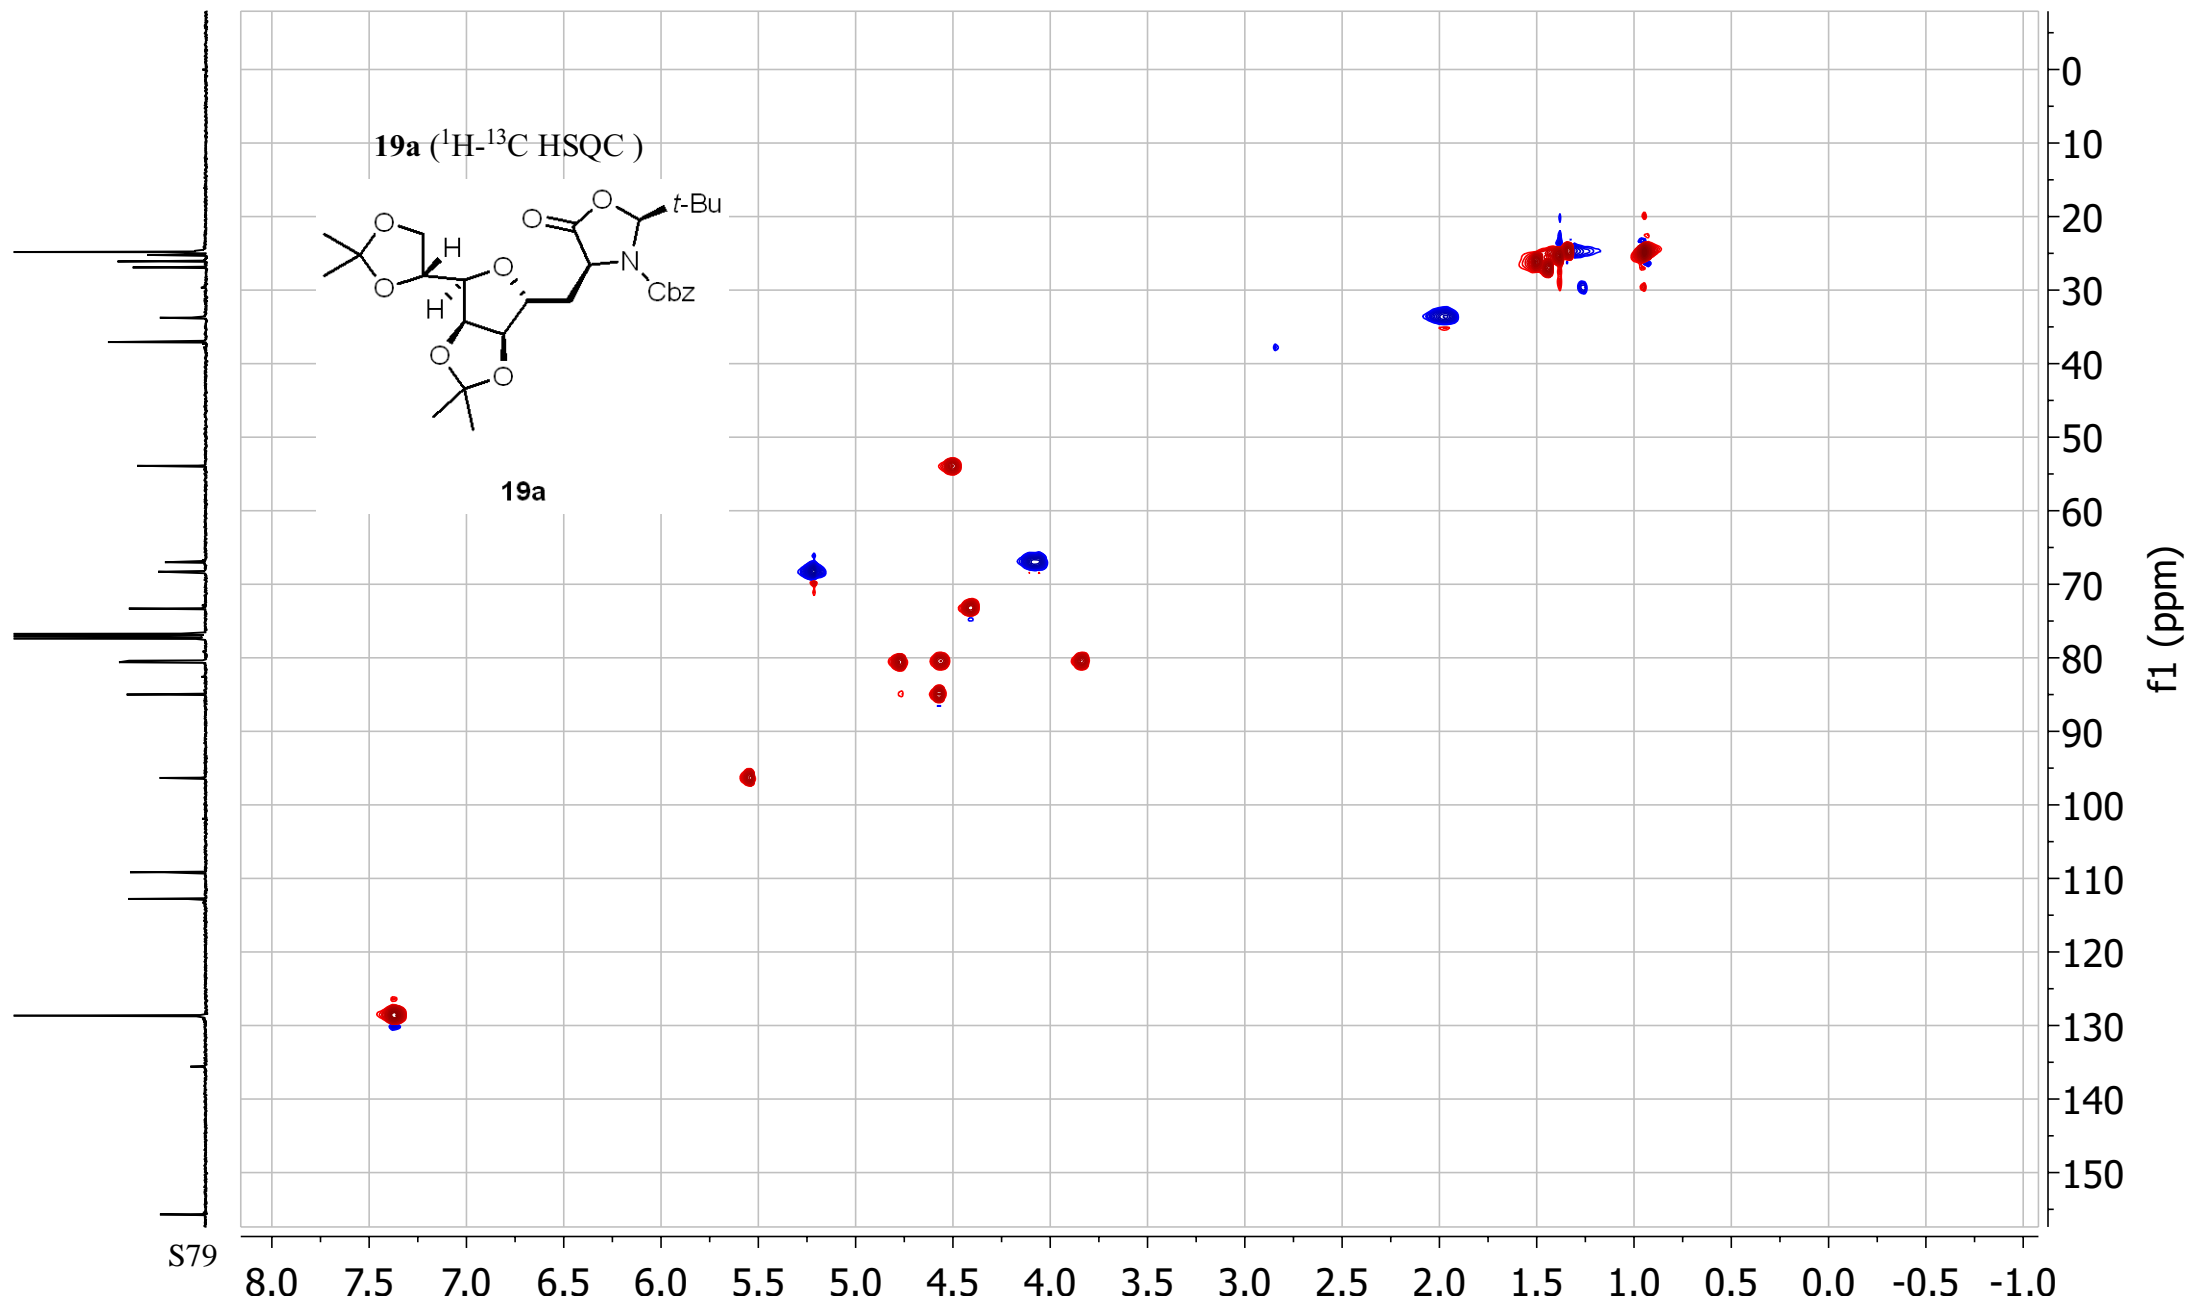

8.06  
8.06  
8.05  
8.05  
8.04  
8.04  
8.04  
8.04  
8.03  
8.03  
8.02  
8.02  
7.59  
7.58  
7.57  
7.56  
7.55  
7.46  
7.46  
7.45  
7.44  
7.44  
7.43  
7.43  
7.38  
7.38  
7.38  
7.37  
7.37  
7.36  
7.36  
7.35  
7.35  
7.34  
7.34  
7.32  
7.26  
5.57  
5.16  
4.54  
4.53  
4.52  
4.51  
4.39  
4.39  
4.38  
4.37  
4.36  
4.34  
4.23  
2.28  
2.26  
2.24  
2.05  
2.03  
1.52  
1.45  
1.30  
1.29  
0.98  
0.95

19b (<sup>1</sup>H NMR, 400MHz, CDCl<sub>3</sub>)

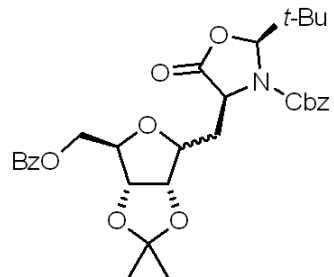

19b, major β

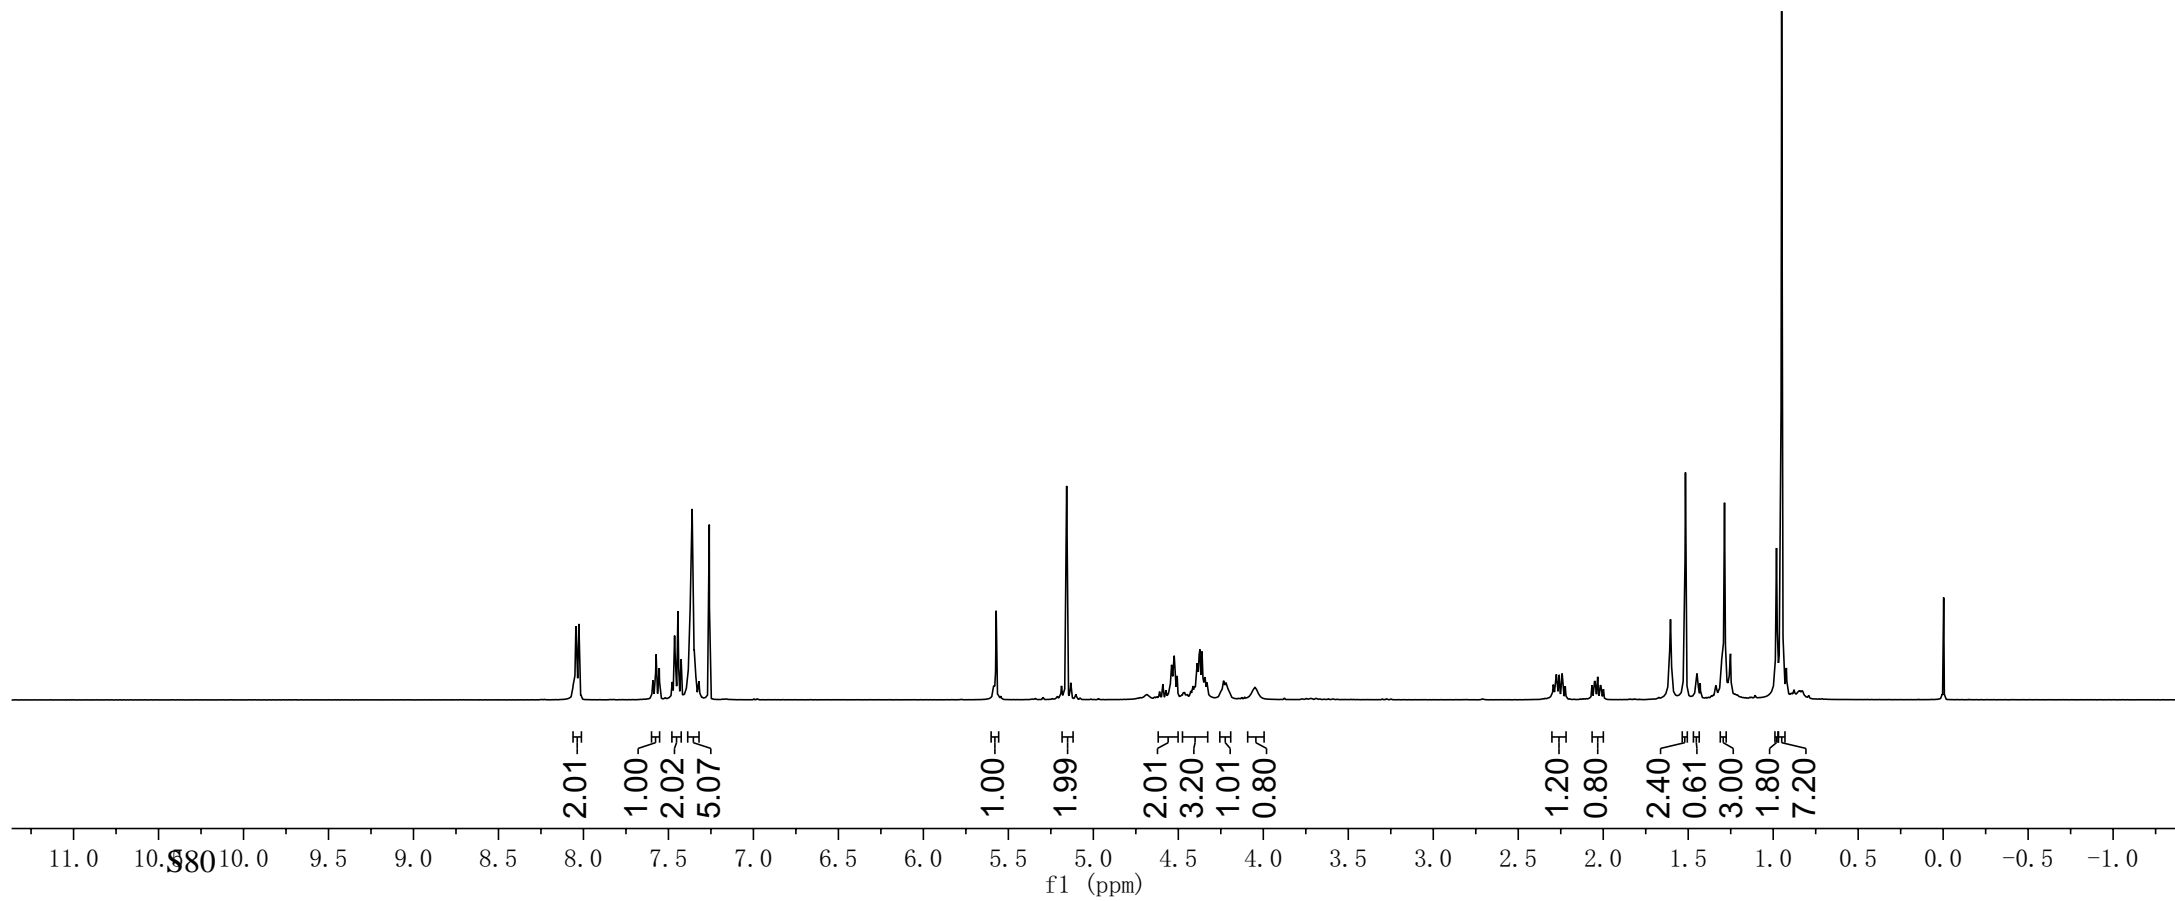

**19b** ( $^{13}\text{C}$  NMR, 101MHz,  $\text{CDCl}_3$ )

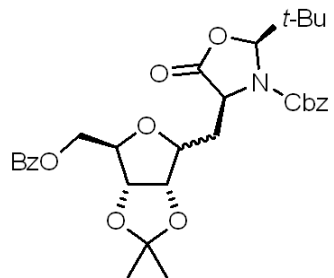

**19b**, major  $\beta$

172.48  
166.40  
156.03  
135.18  
133.33  
129.91  
129.88  
129.84  
128.92  
128.87  
128.84  
128.65  
128.59  
115.12  
113.02  
96.60  
84.64  
83.33  
82.17  
81.78  
81.60  
80.69  
77.48  
77.16  
76.84  
68.76  
64.61  
53.95  
37.57  
37.17  
27.58  
26.38  
25.78  
25.23  
25.05  
24.96

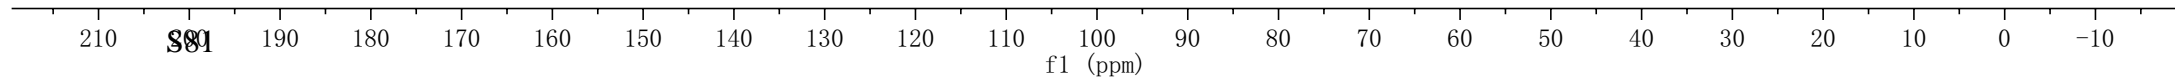

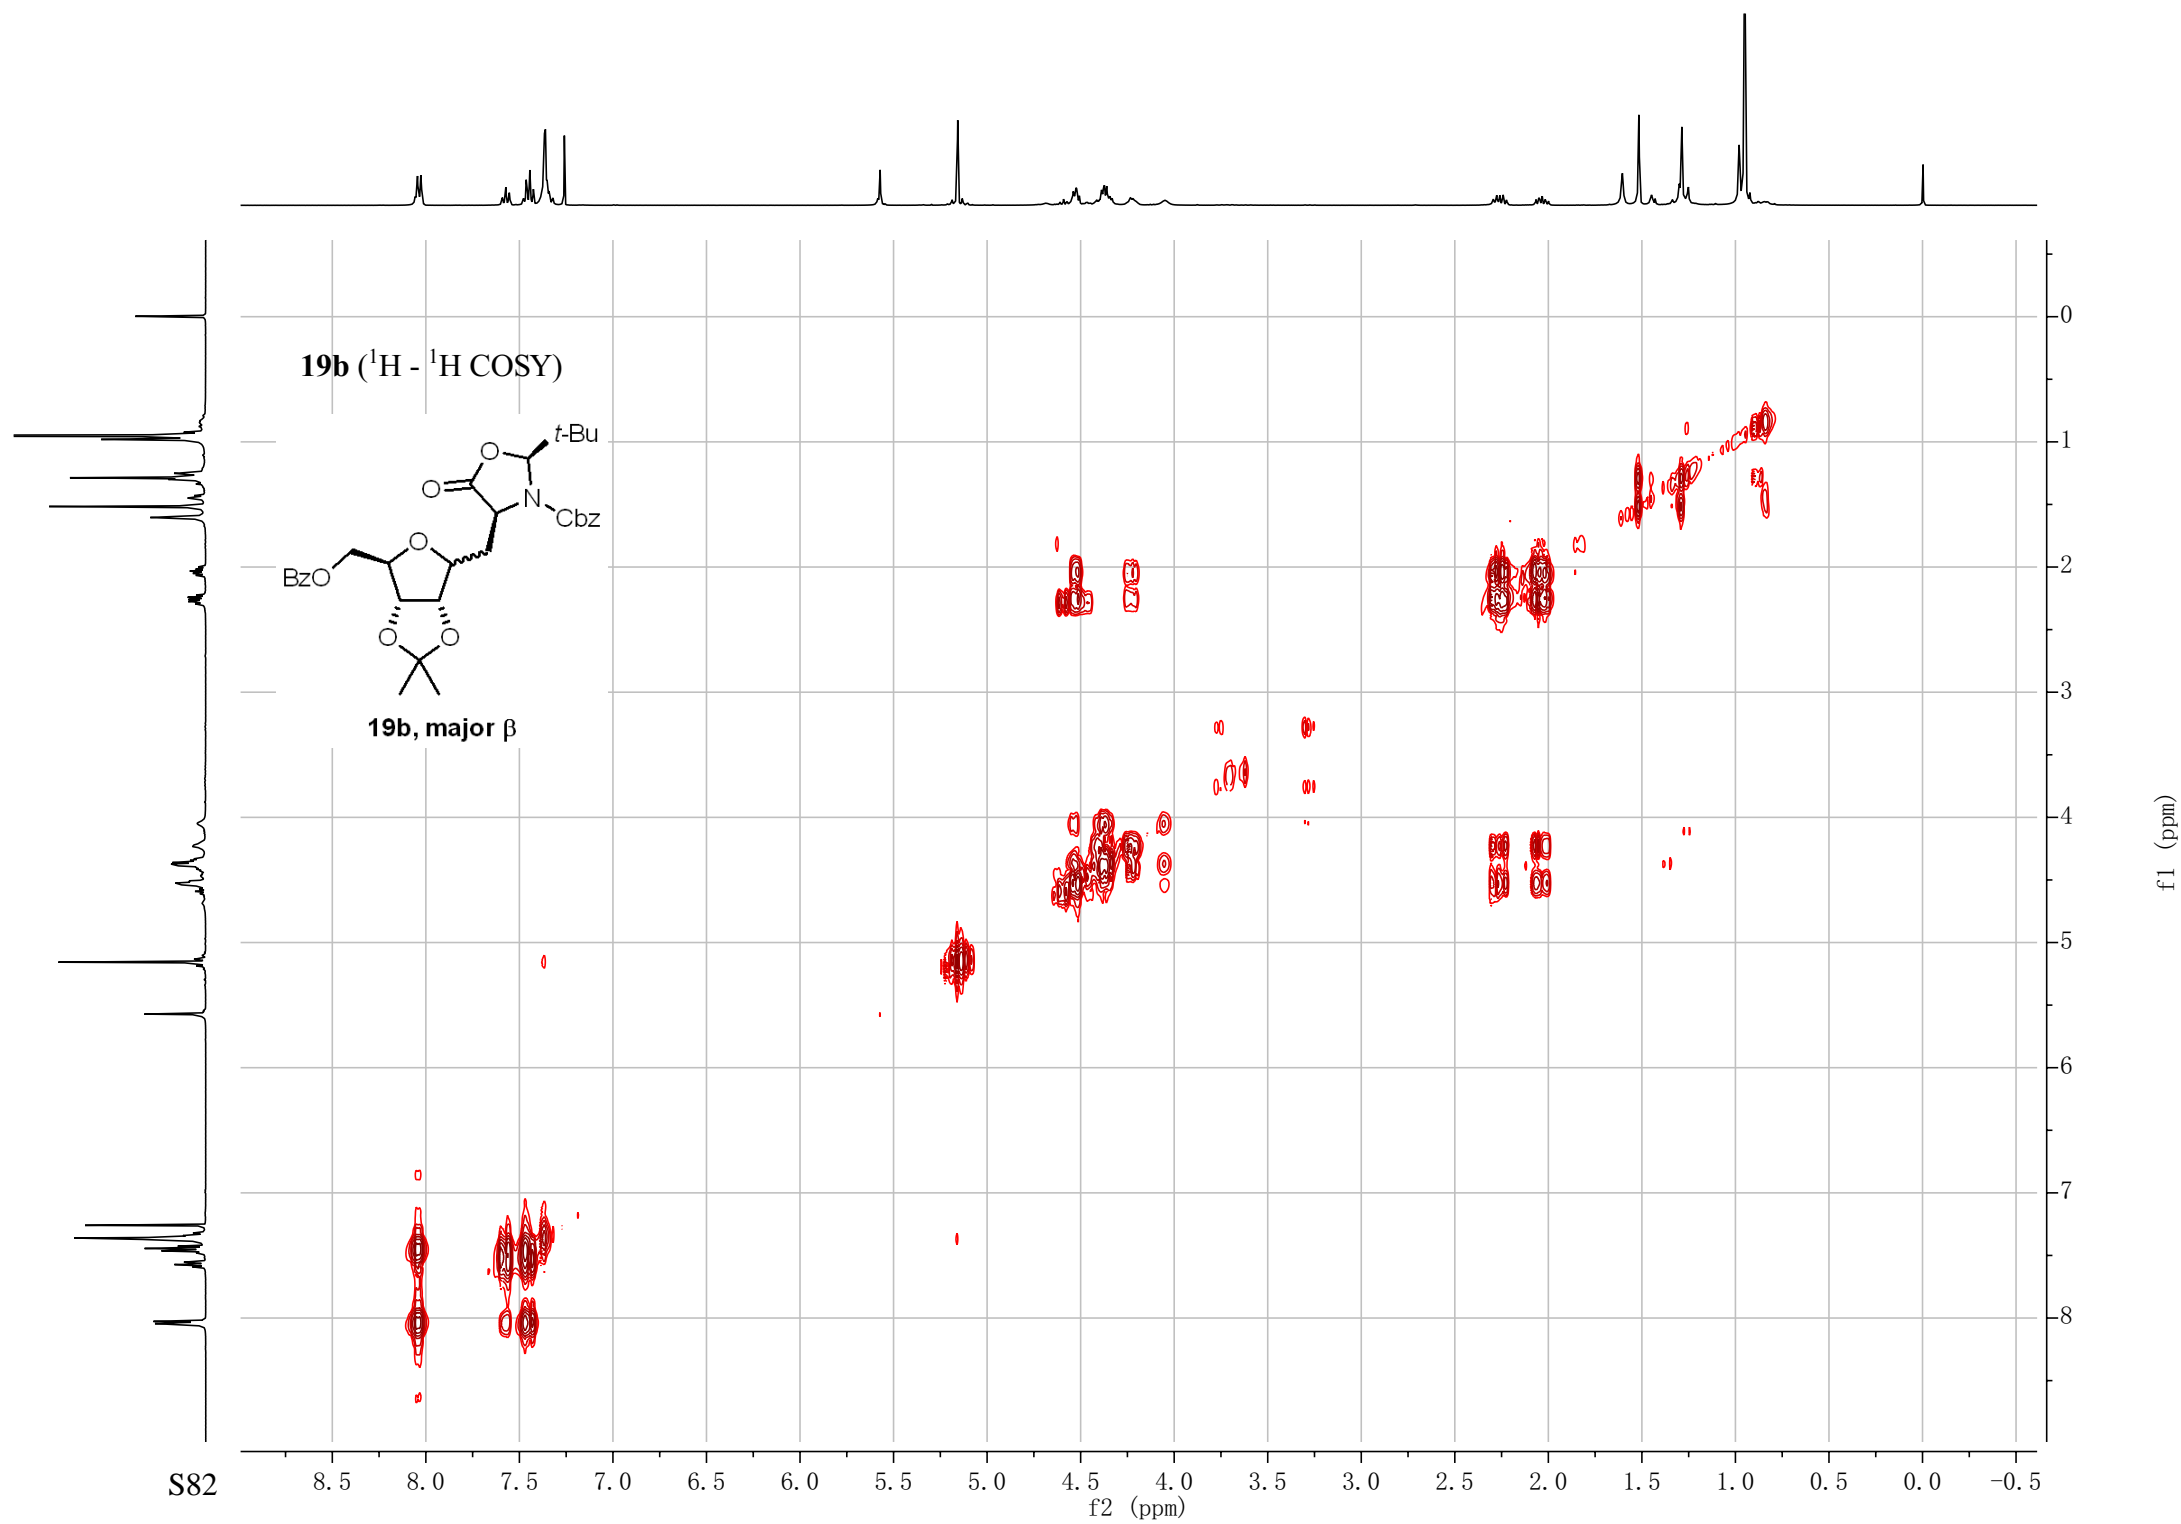

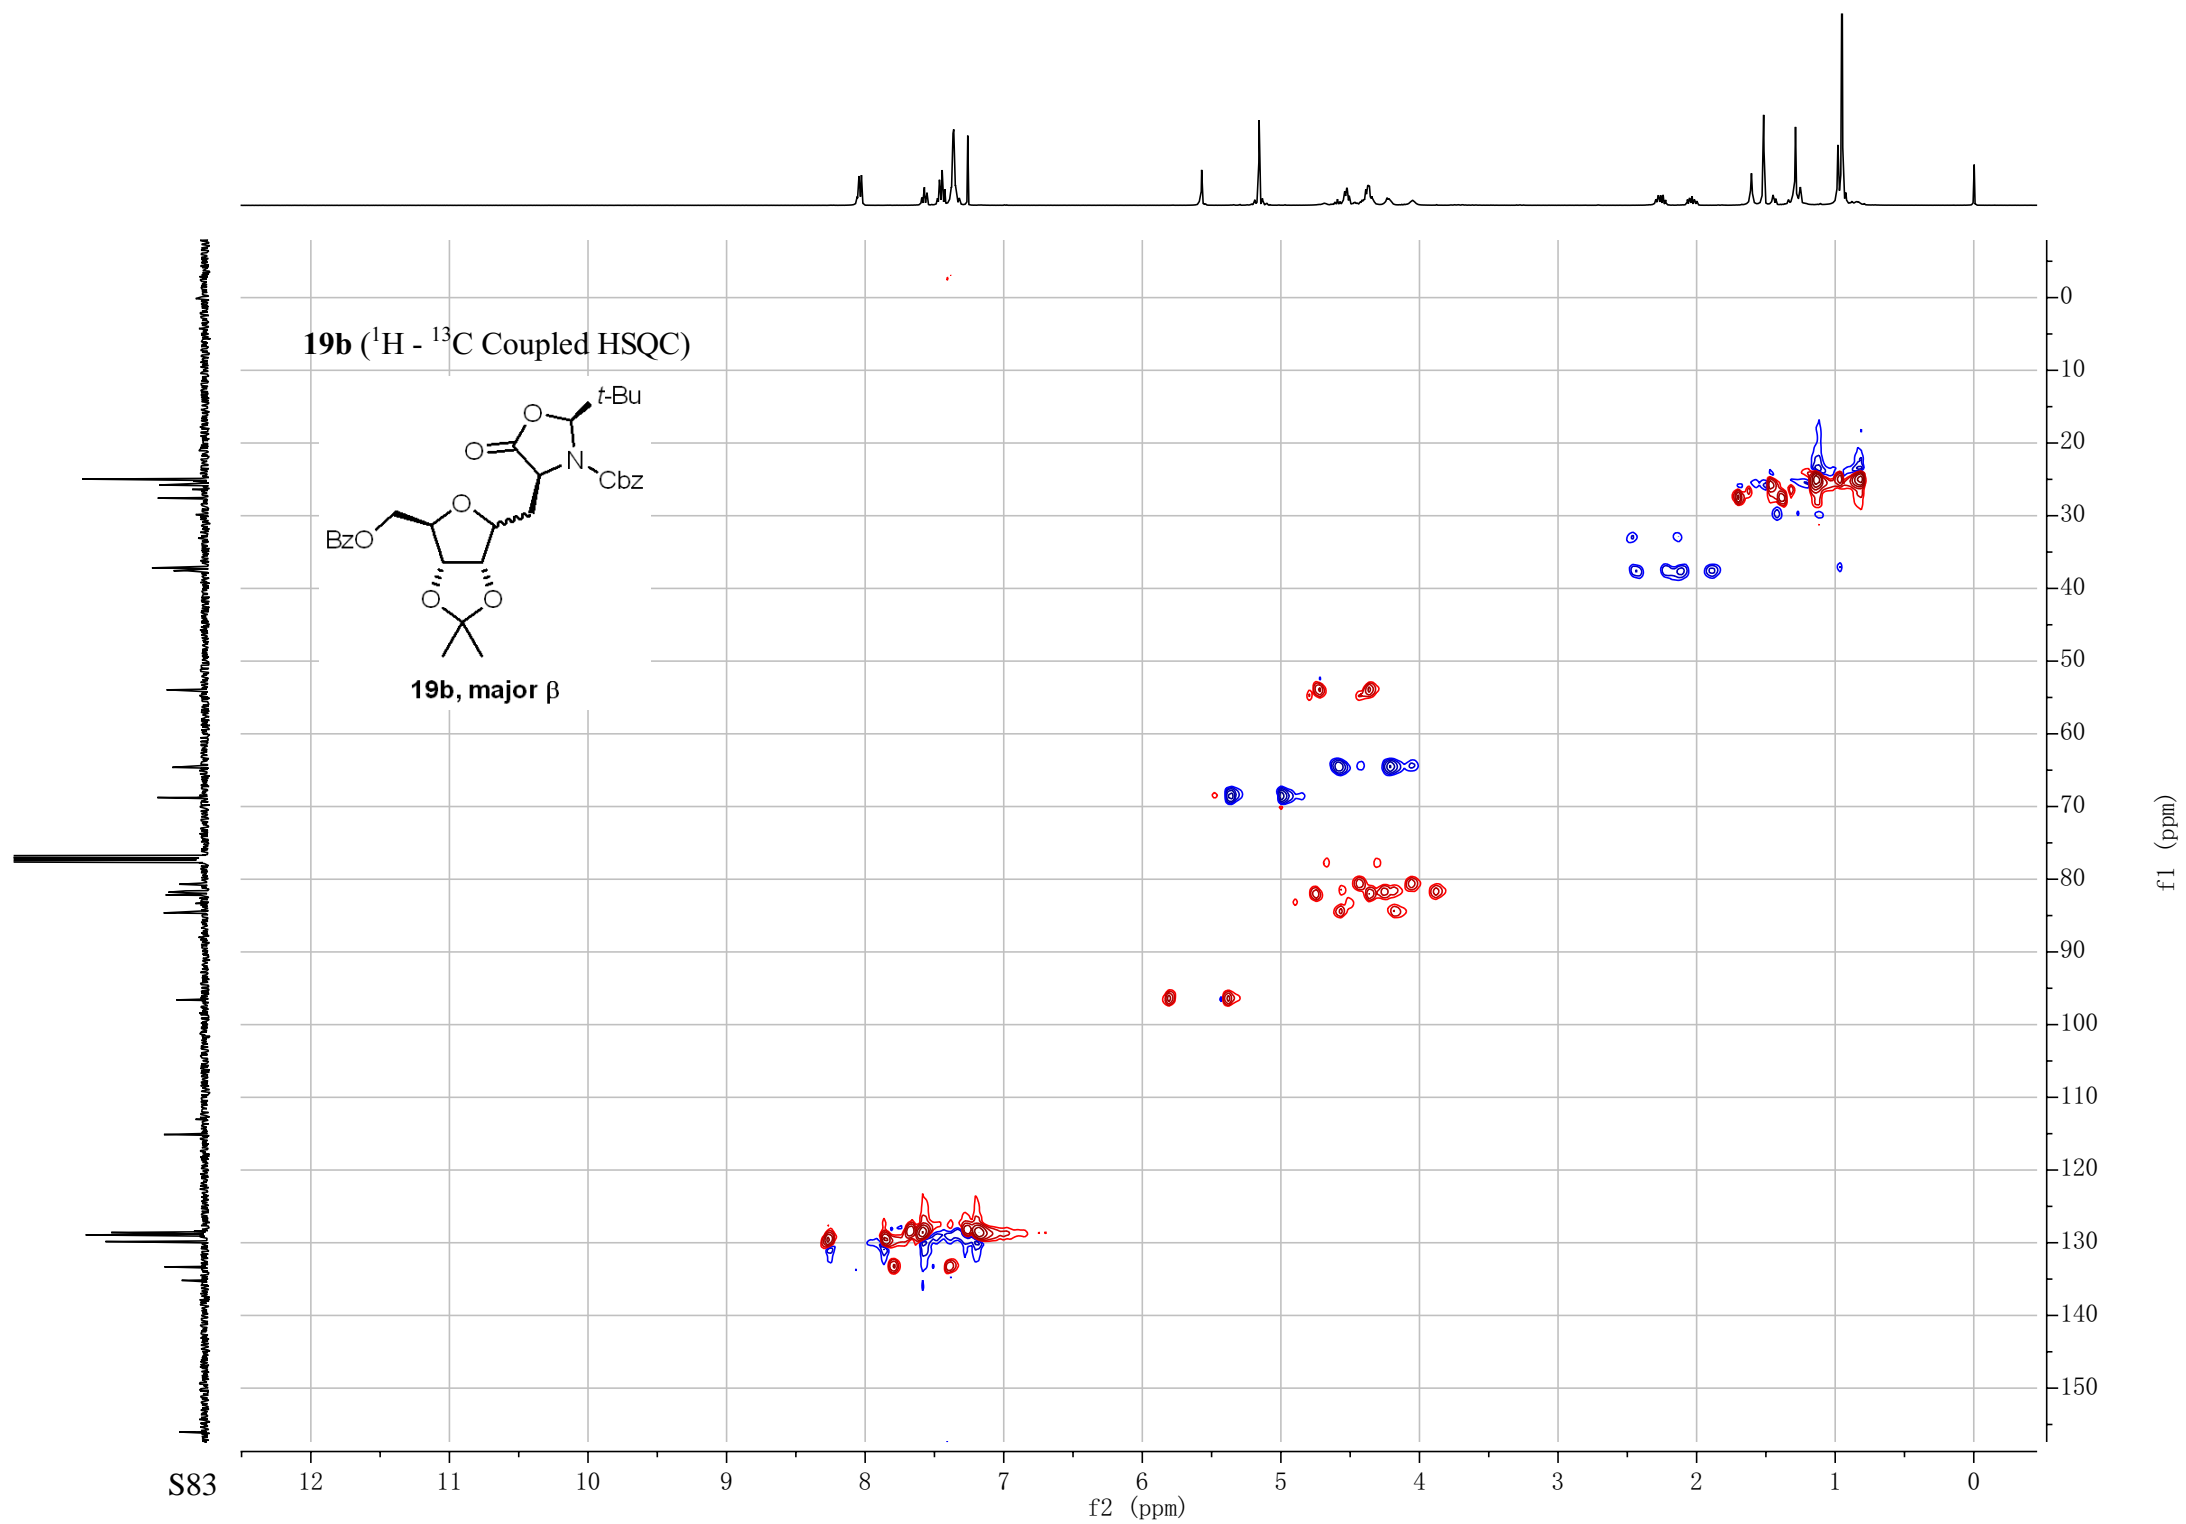

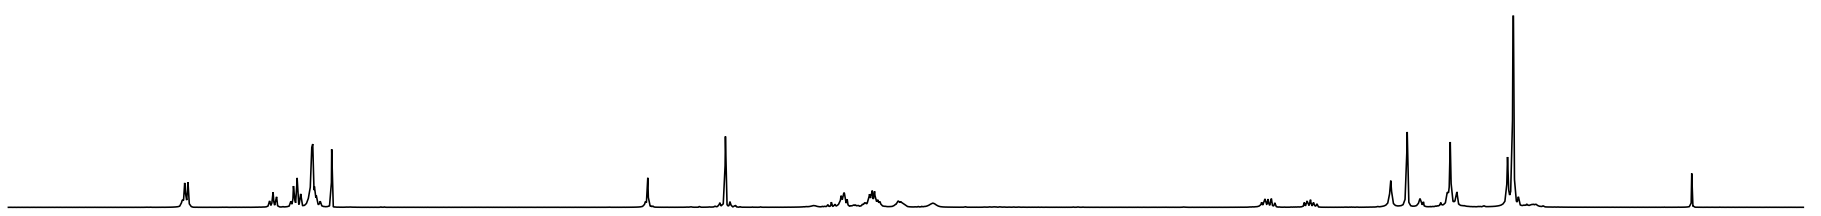

**19b** ( $^1\text{H} - ^{13}\text{C}$  HSQC)

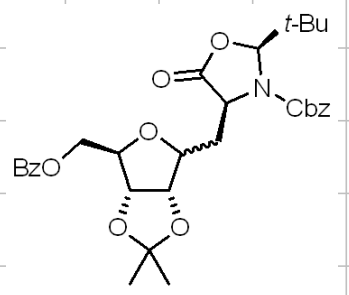

**19b**, major  $\beta$

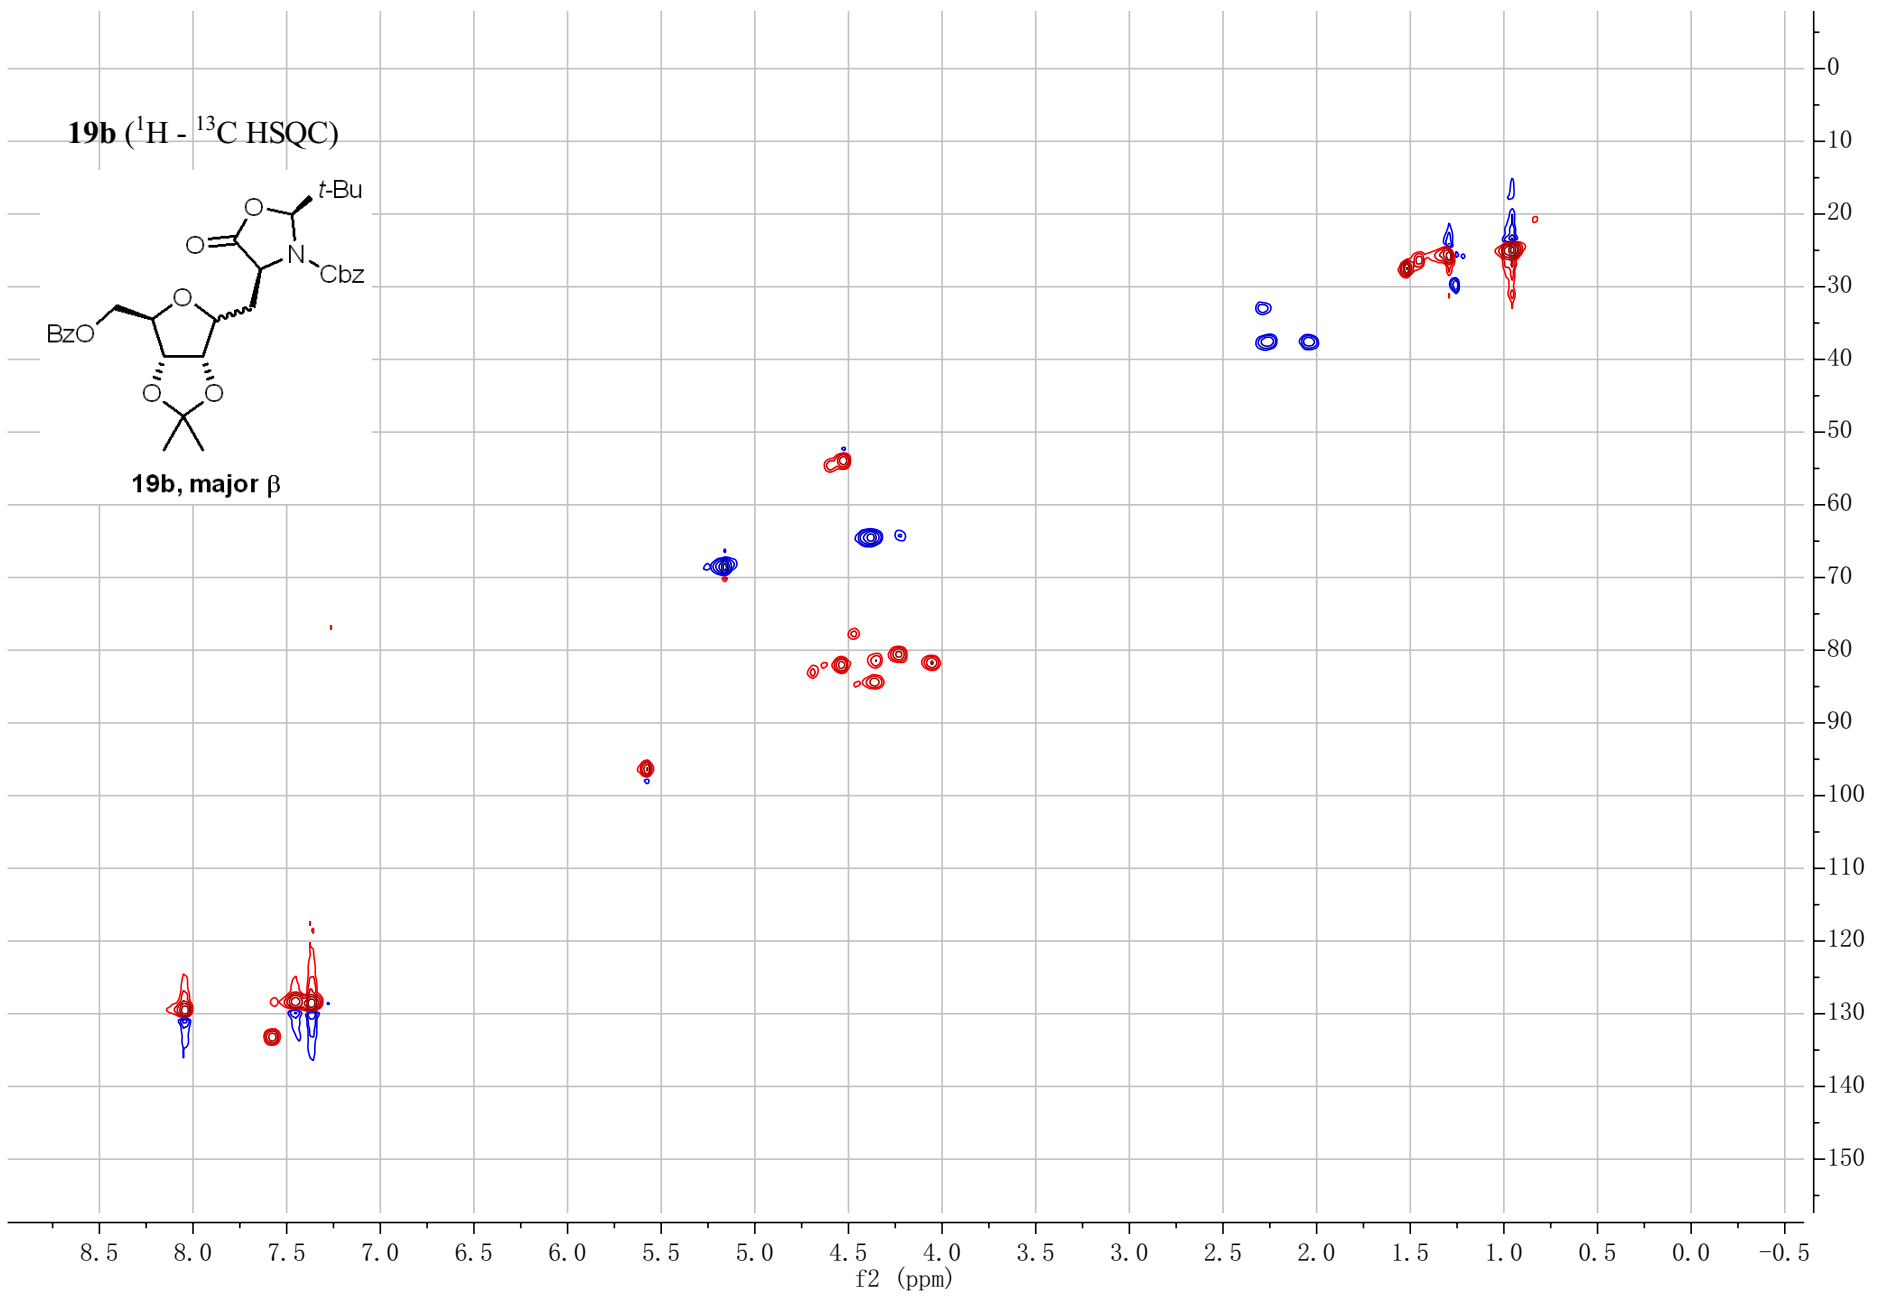

S84

f2 (ppm)

f1 (ppm)

7.40  
7.39  
7.39  
7.38  
7.37  
7.37  
7.36  
7.36  
7.35  
7.35  
7.26  
5.58  
5.19  
5.17  
4.57  
4.52  
4.51  
4.51  
4.49  
4.45  
4.43  
4.43  
4.42  
4.31  
4.21  
4.20  
4.19  
4.18  
4.17  
4.16  
4.08  
4.07  
4.06  
4.05  
4.04  
4.04  
3.95  
2.28  
2.27  
2.25  
2.23  
2.21  
2.07  
2.06  
2.04  
2.04  
2.02  
2.02  
2.00  
2.00  
1.99  
1.98  
1.97  
1.50  
1.43  
1.30  
1.28  
1.28  
0.98  
0.96

**19c** ( $^1\text{H}$  NMR, 400MHz,  $\text{CDCl}_3$ )

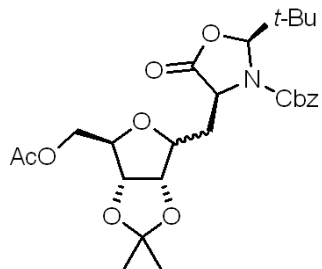

**19c, major  $\beta$**

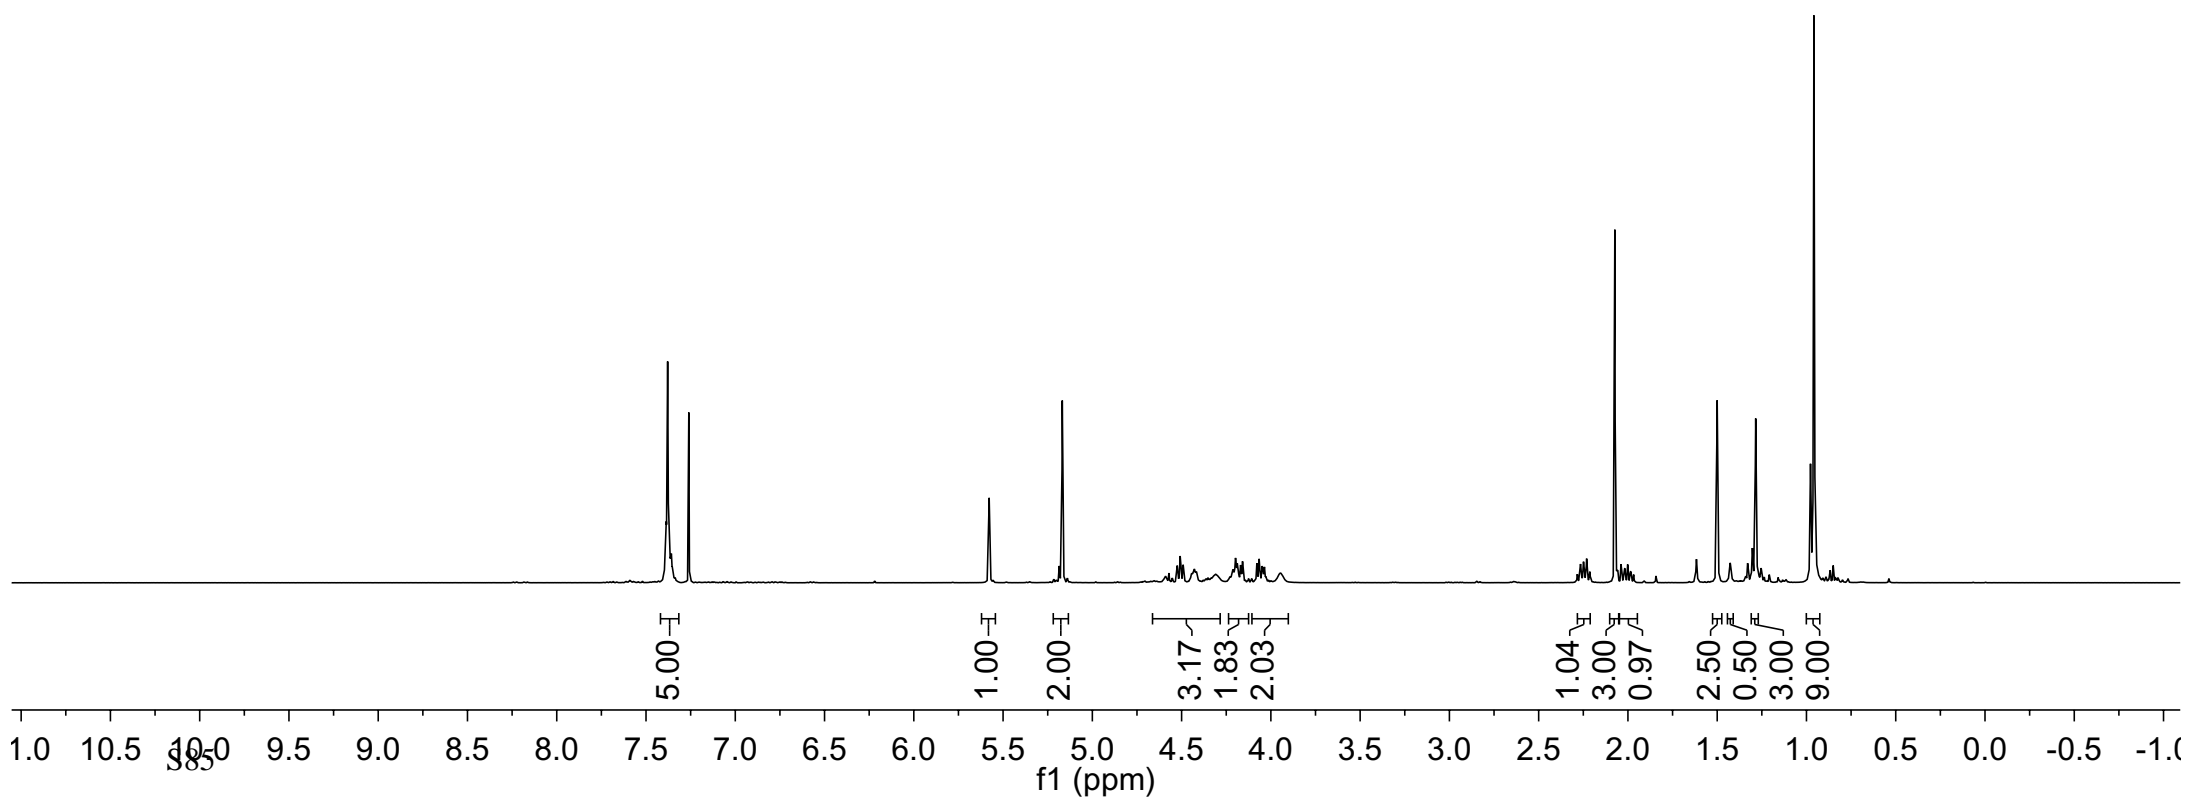



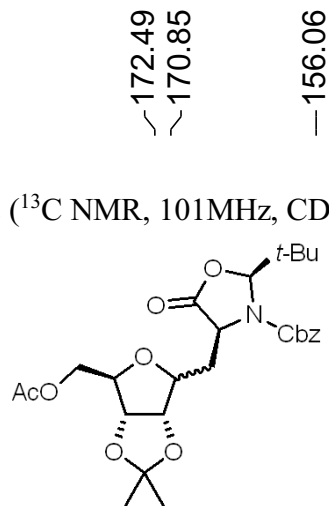

**19c** ( $^{13}\text{C}$  NMR, 101MHz,  $\text{CDCl}_3$ )

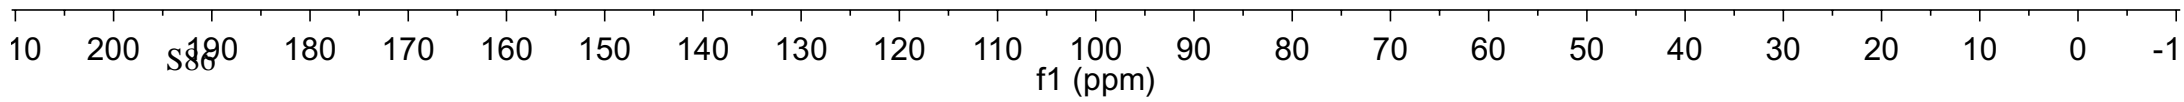

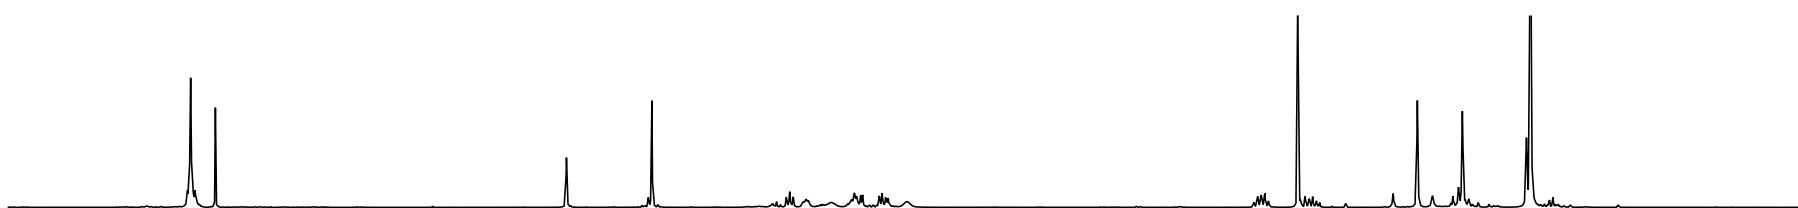

**19c** ( $^1\text{H} - ^1\text{H}$  COSY)

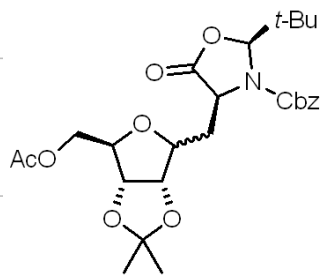

**19c**, major  $\beta$

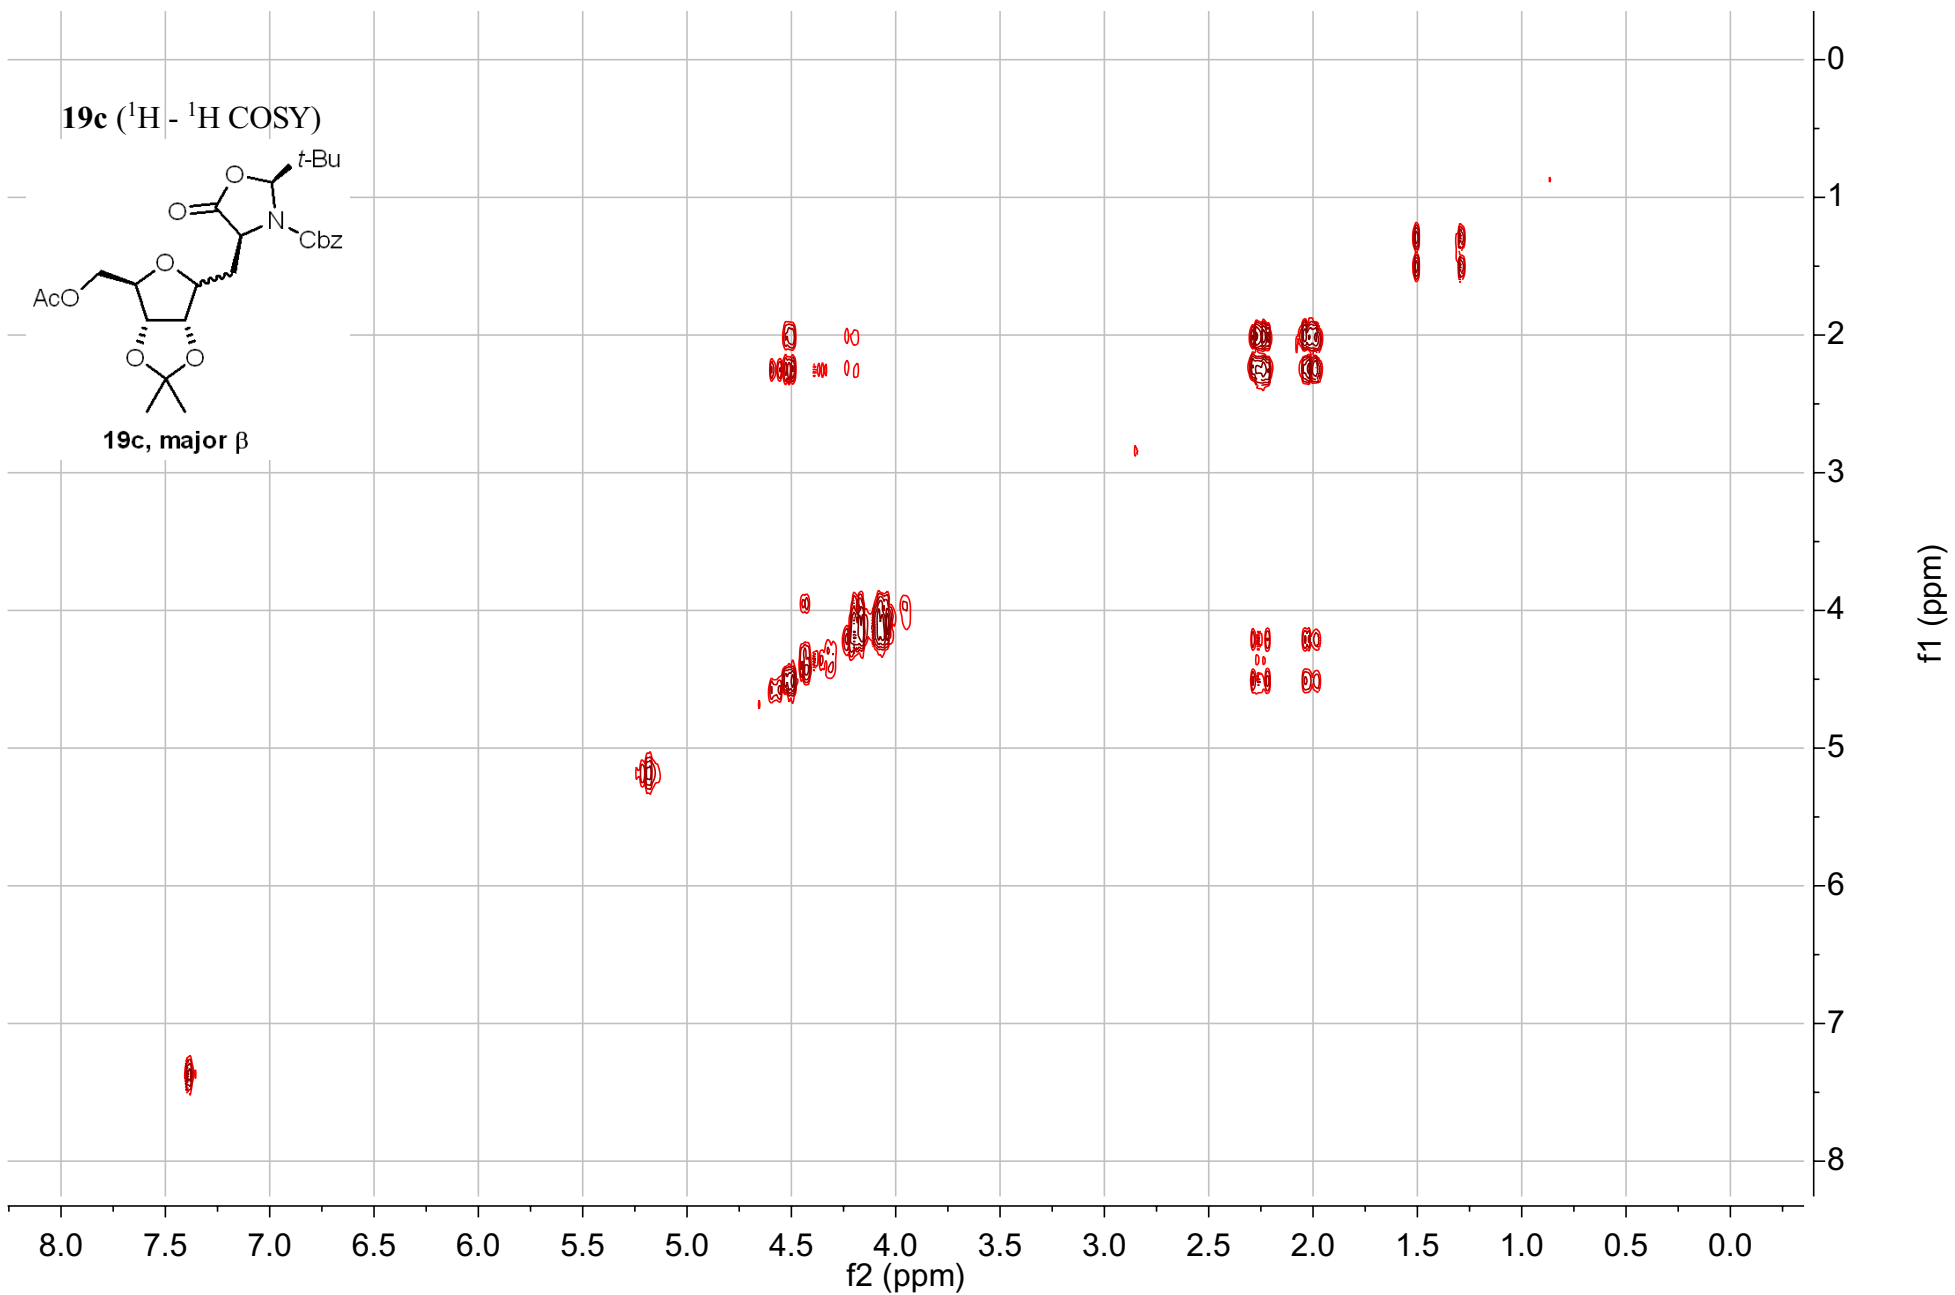

S87

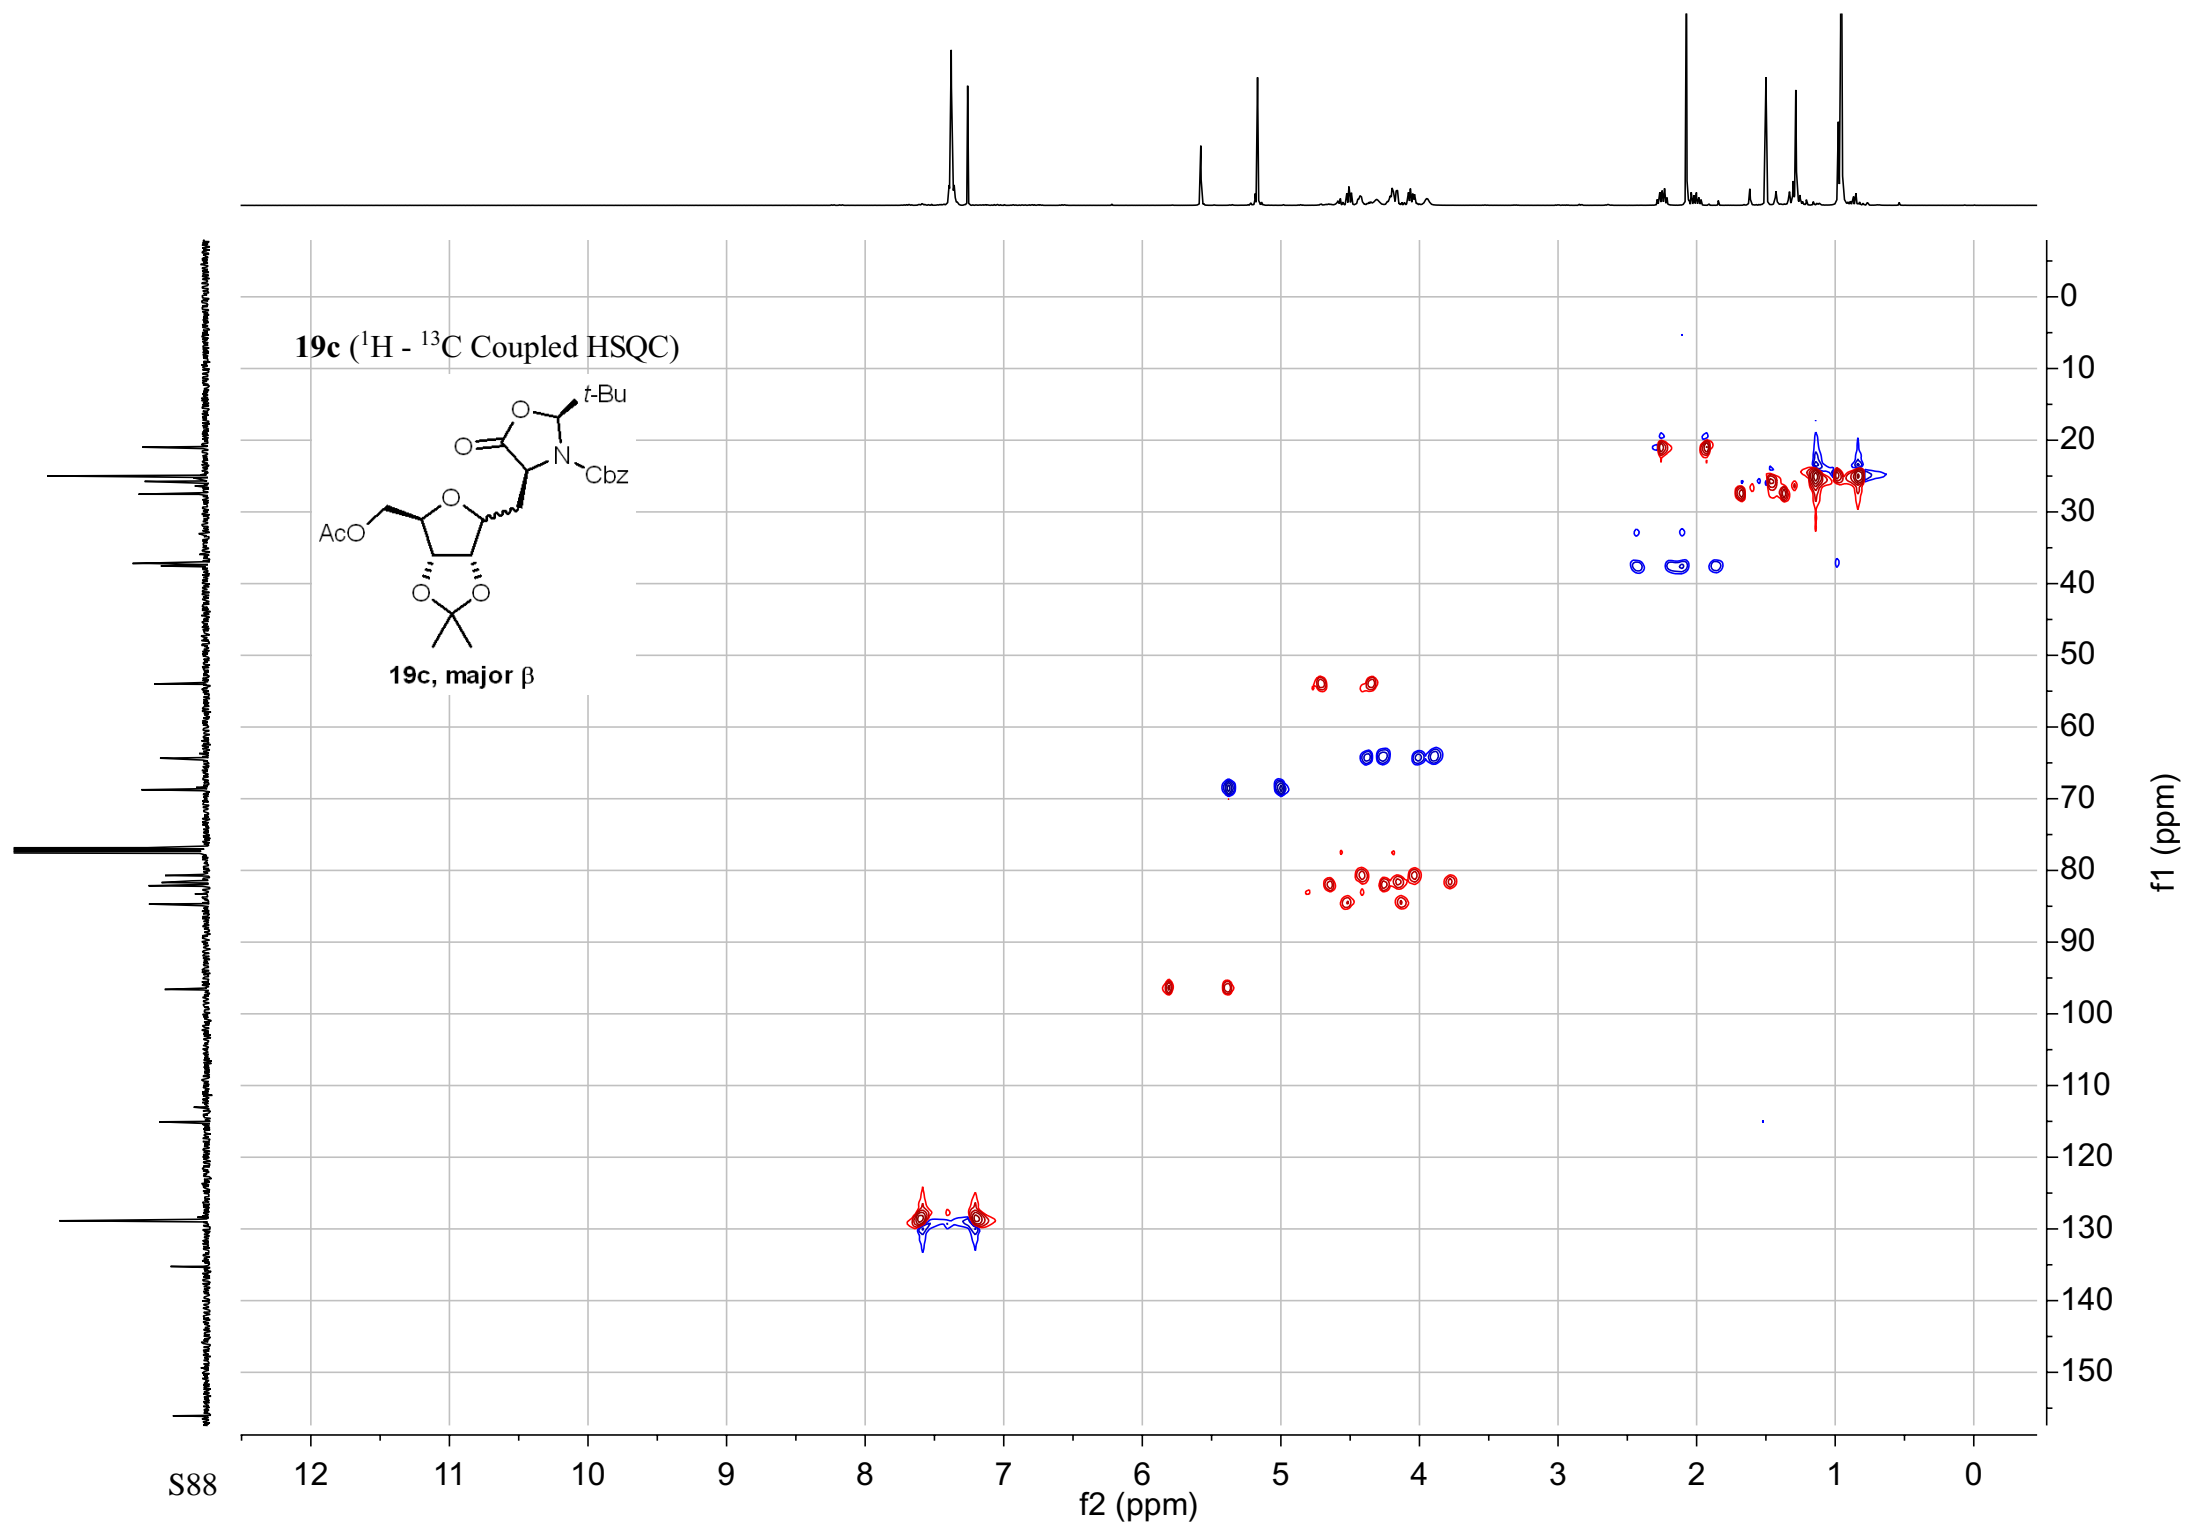

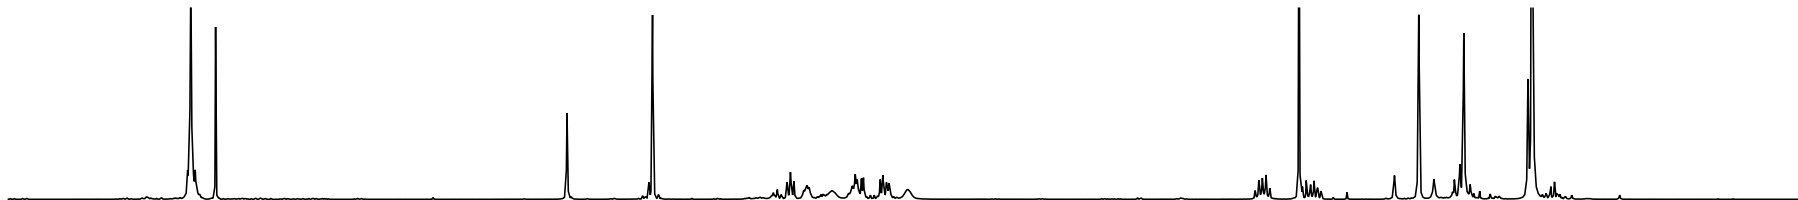

**19c** ( $^1\text{H} - ^{13}\text{C}$  HSQC)

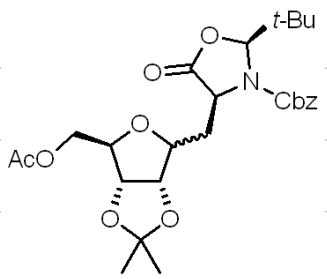

**19c, major  $\beta$**

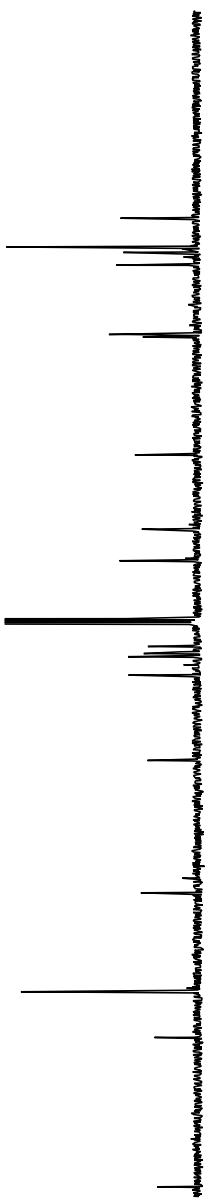

S89

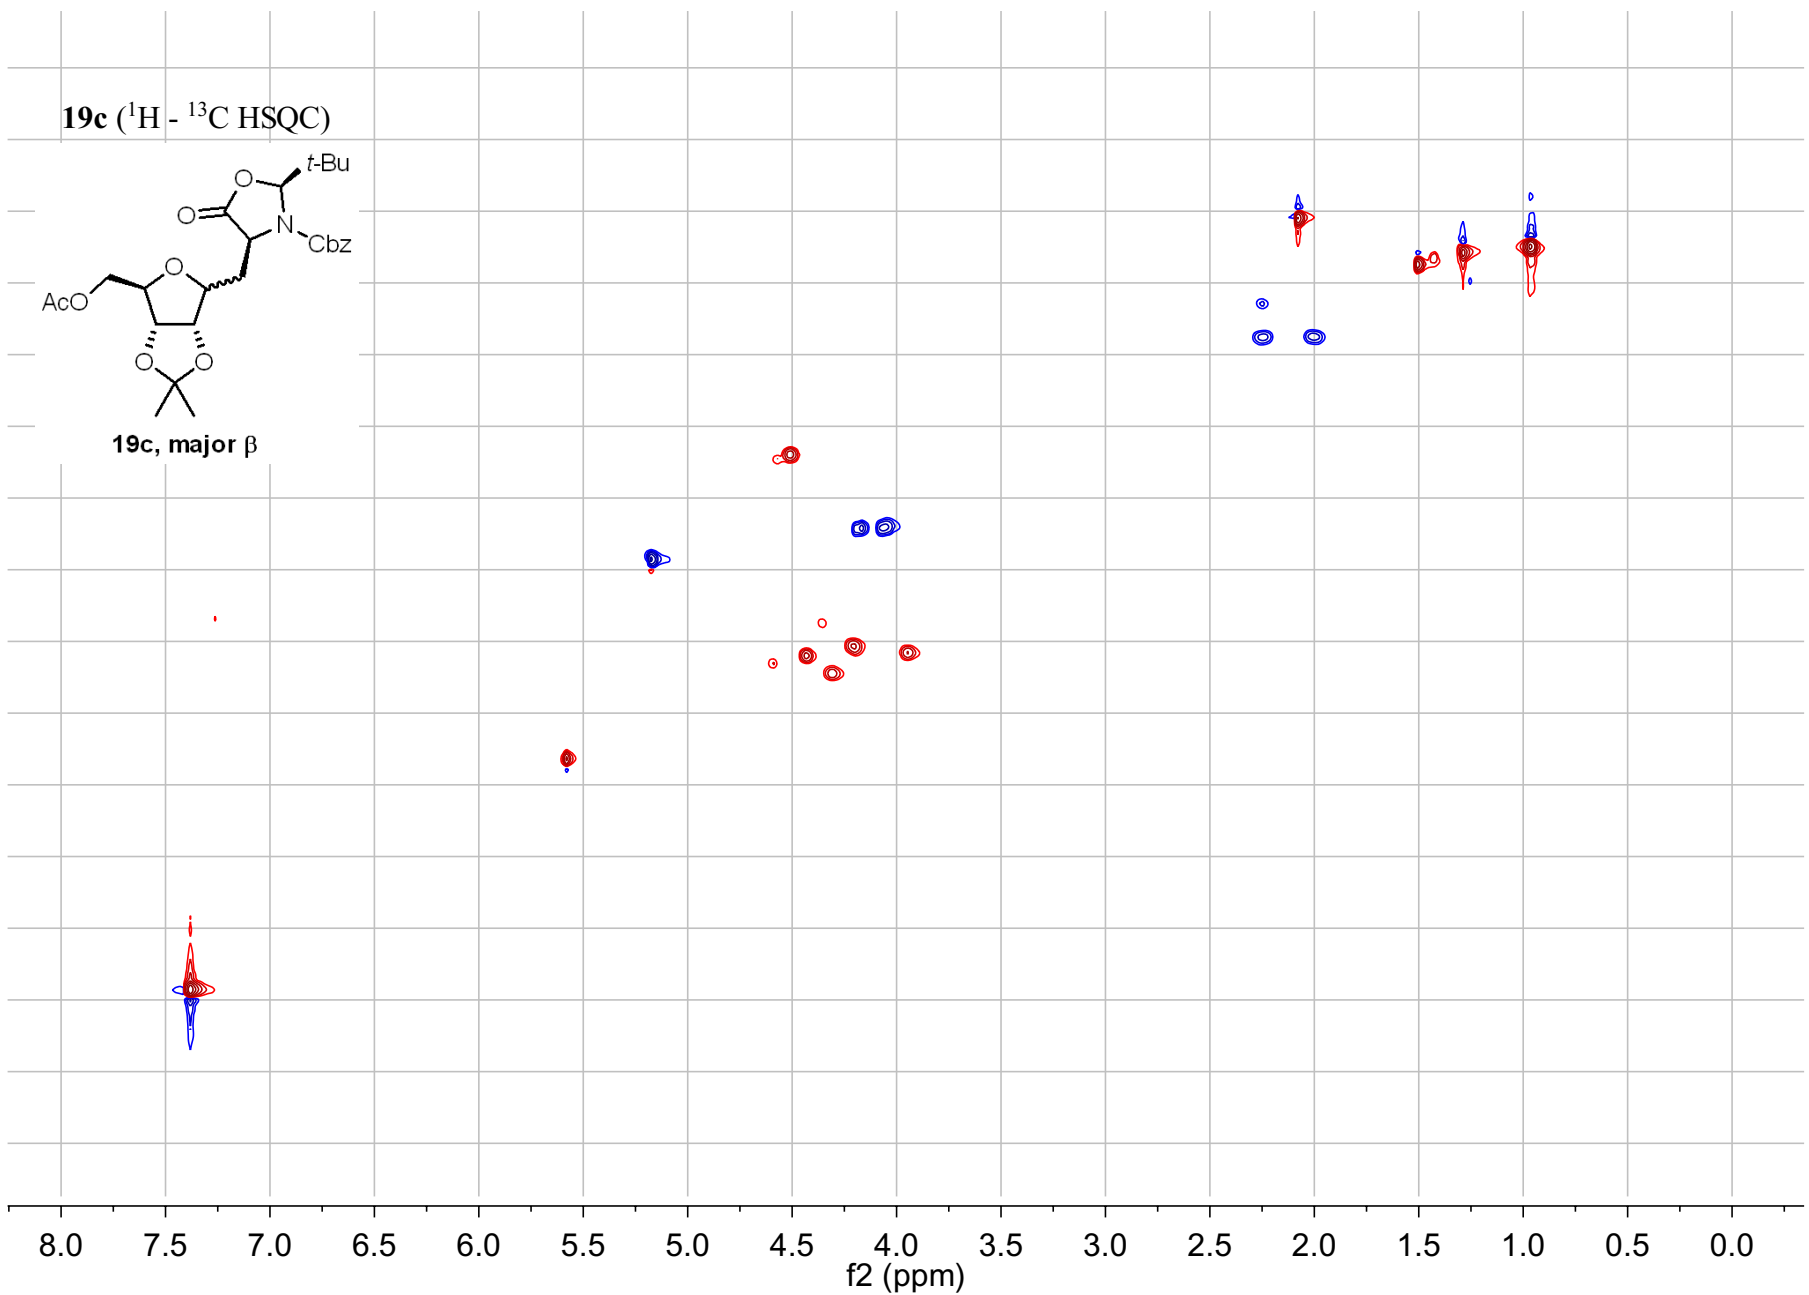

f1 (ppm)

f2 (ppm)

7.72  
7.71  
7.71  
7.70  
7.70  
7.69  
7.69  
7.68  
7.68  
7.67  
7.67  
7.45  
7.44  
7.43  
7.43  
7.42  
7.42  
7.41  
7.40  
7.40  
7.39  
7.39  
7.38  
7.37  
7.37  
7.36  
7.36  
7.35  
7.35  
7.34  
7.33  
7.32  
7.32  
7.31  
7.31  
5.60  
5.59  
5.20  
5.17  
5.15  
5.12  
4.65  
4.55  
4.53  
3.73  
3.73  
3.72  
3.72  
2.28  
2.27  
2.25  
1.51  
1.44  
1.33  
1.31  
1.08  
1.07  
0.99  
0.97

**19d** ( $^1\text{H}$  NMR, 400MHz,  $\text{CDCl}_3$ )

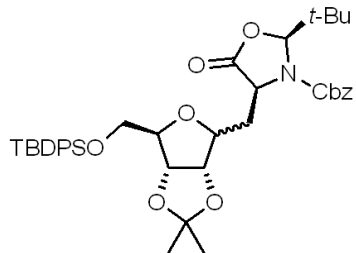

**19d, major  $\beta$**

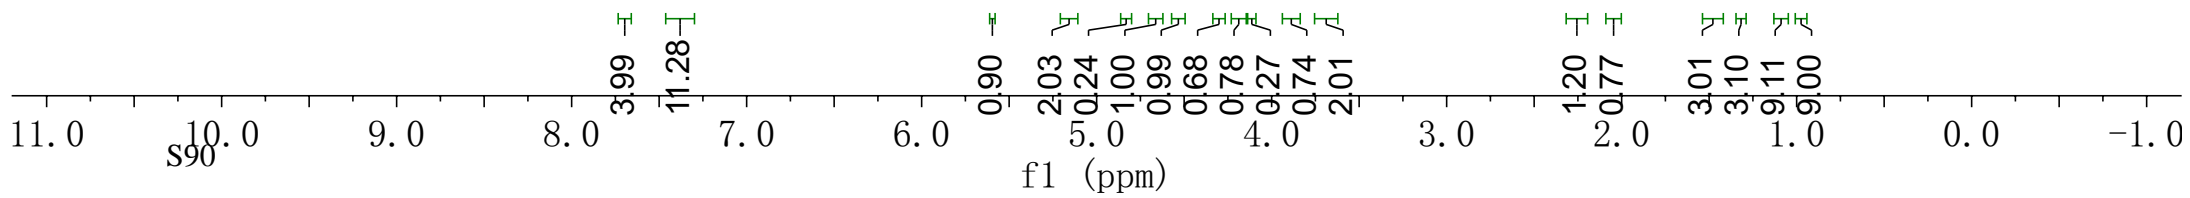

**19d** ( $^{13}\text{C}$  NMR, 101MHz,  $\text{CDCl}_3$ )

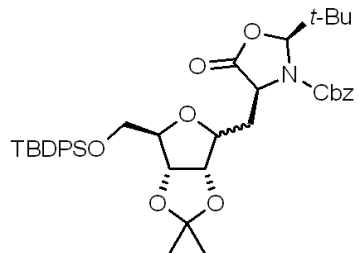

- 172.47
- 172.44
- 156.14
- 156.09
- 135.83
- 135.74
- 135.32
- 135.23
- 133.48
- 133.27
- 133.07
- 132.94
- 129.96
- 129.91
- 129.87
- 129.84
- 128.78
- 128.75
- 128.48
- 127.92
- 127.83
- 127.80
- 114.44
- 112.46
- 96.56
- 96.39
- 84.79
- 84.16
- 84.06
- 83.50
- 82.04
- 81.99
- 80.50
- 77.16
- 68.62
- 64.18
- 54.13
- 37.85
- 37.12
- 27.64
- 26.98
- 26.39
- 25.81
- 25.23
- 25.05
- 24.99
- 19.38
- 19.20

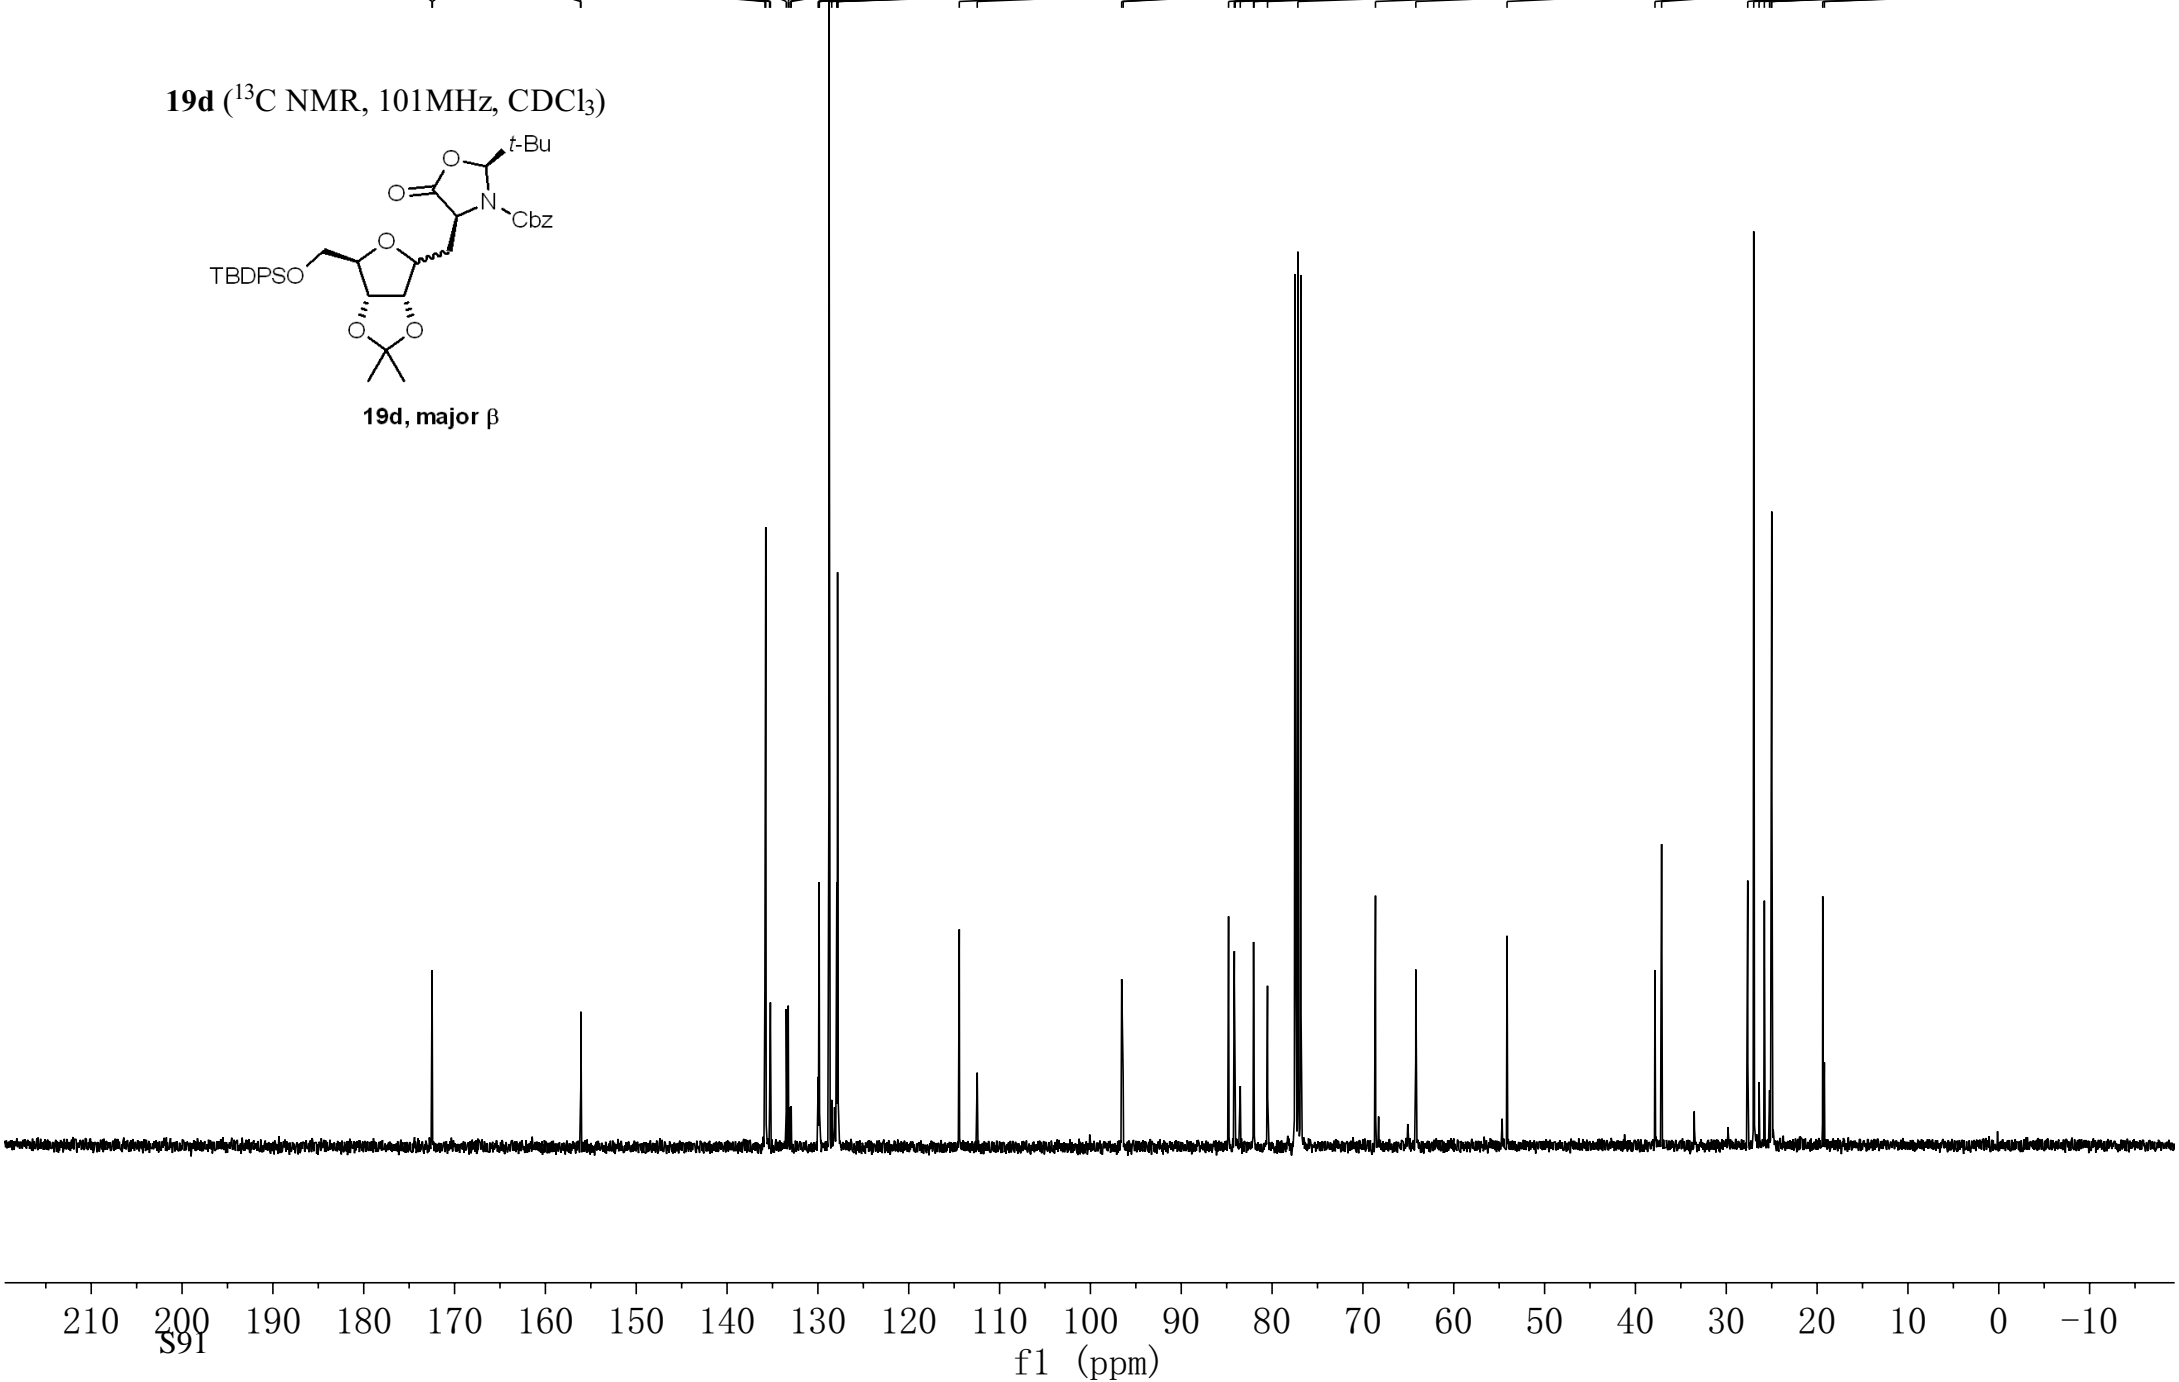

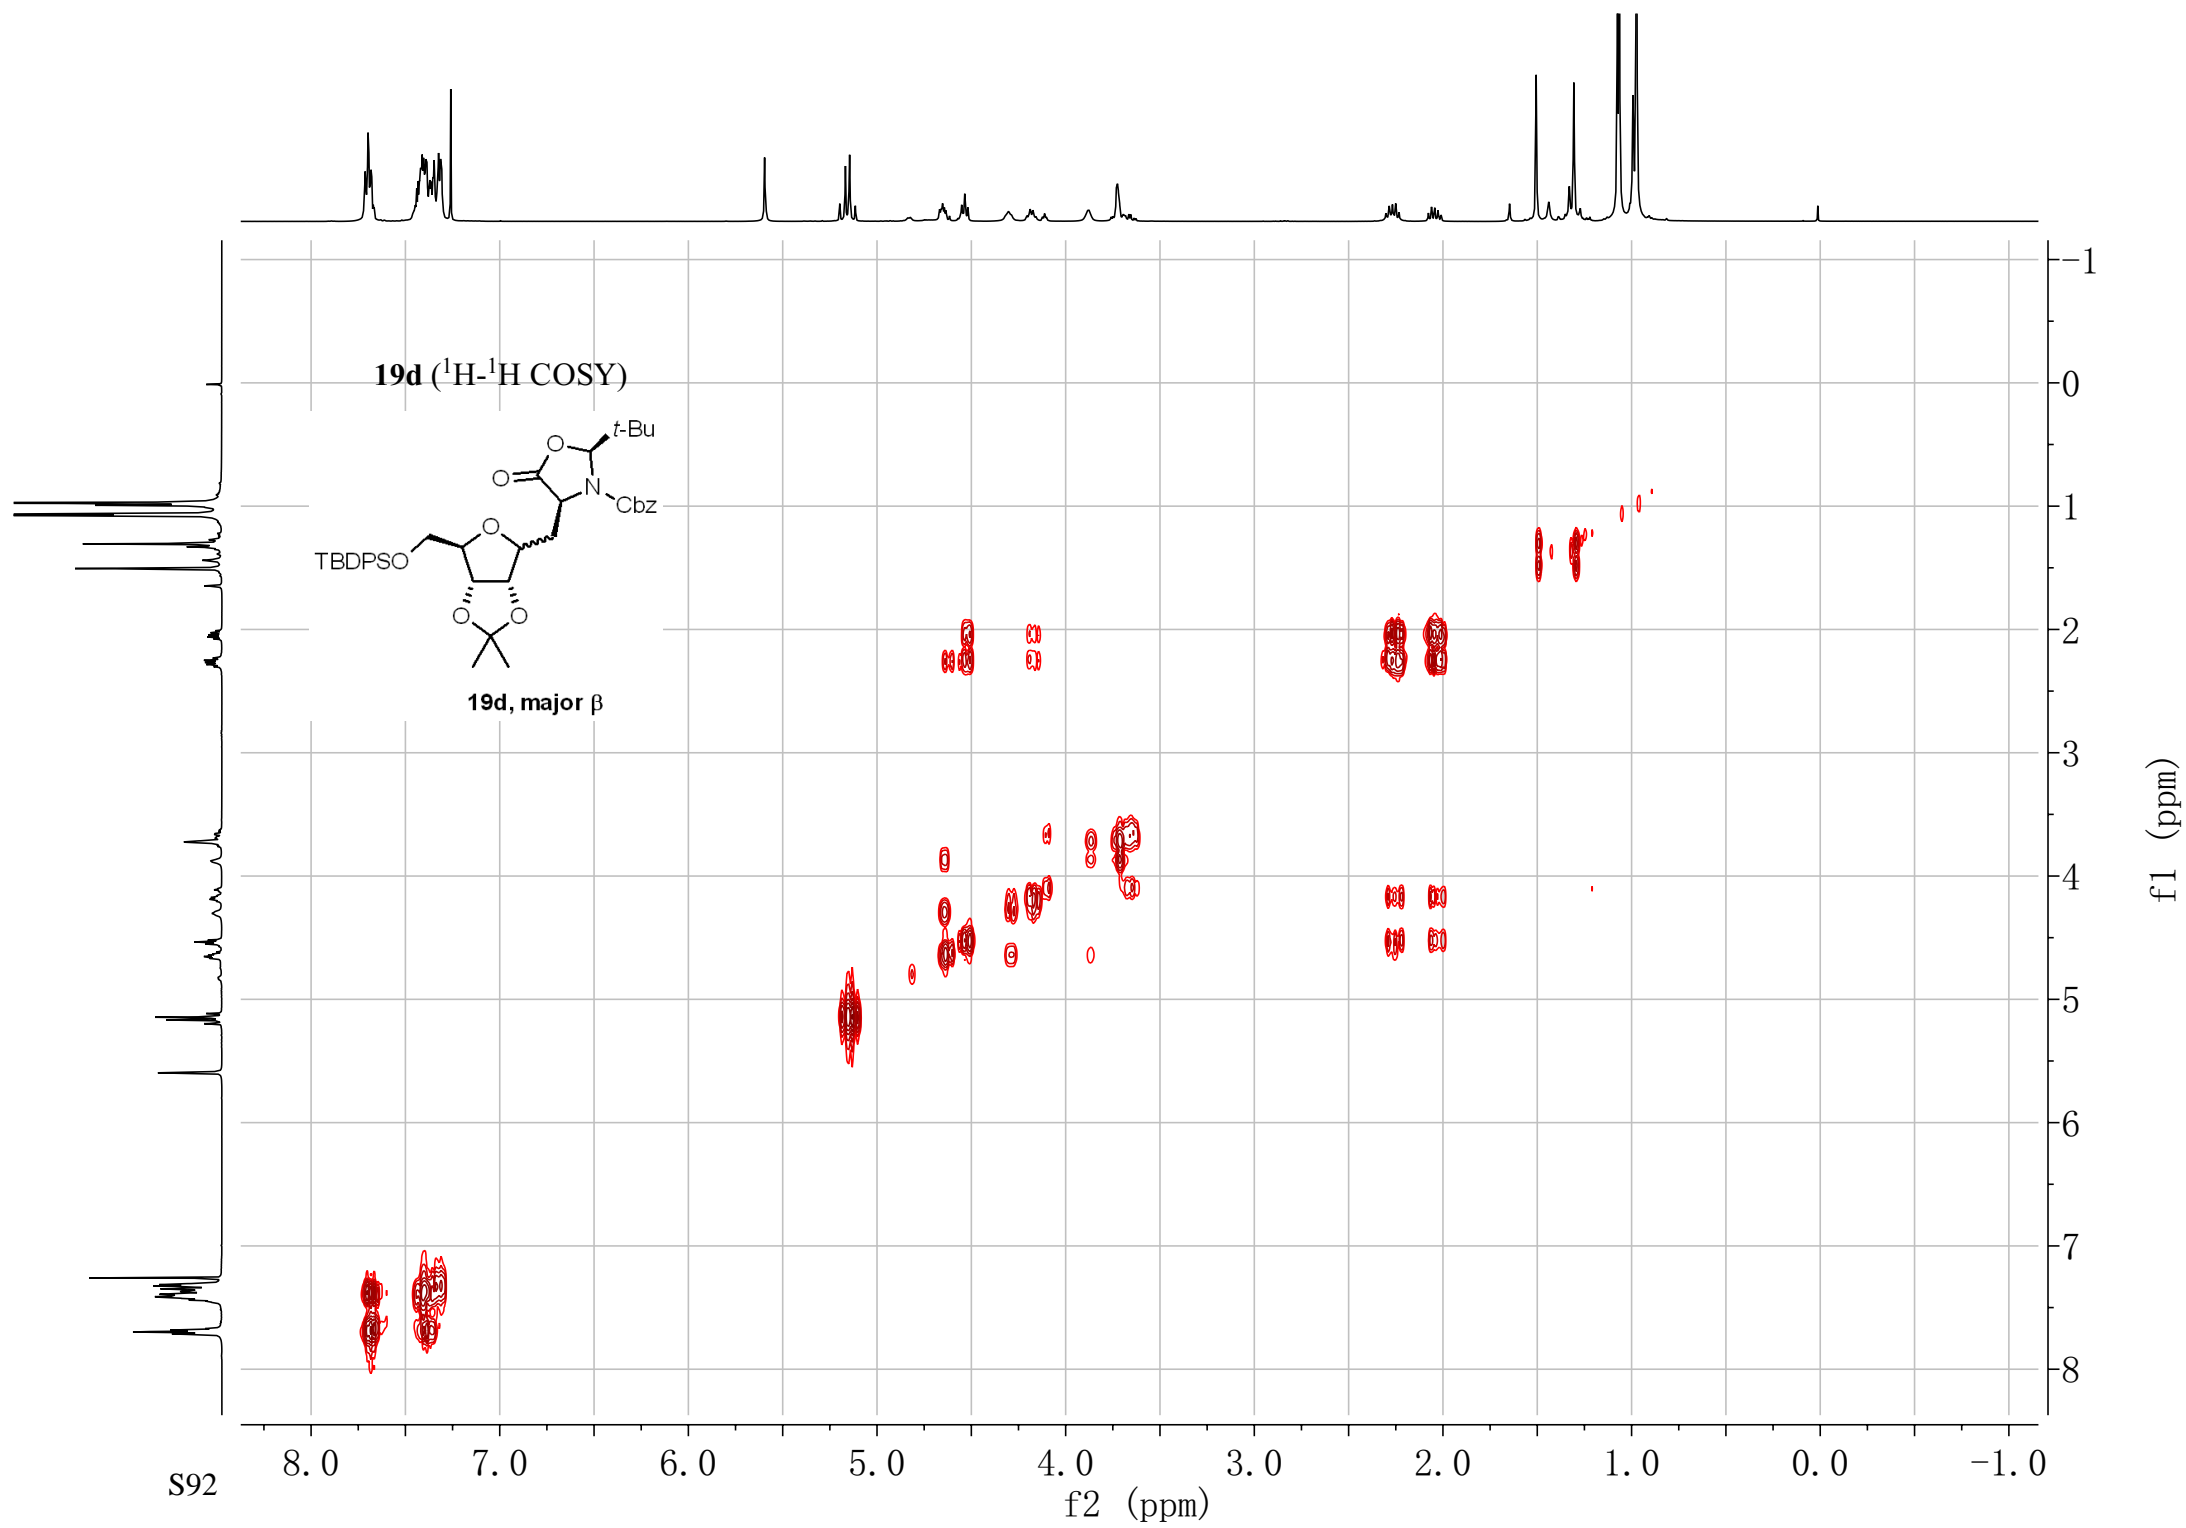

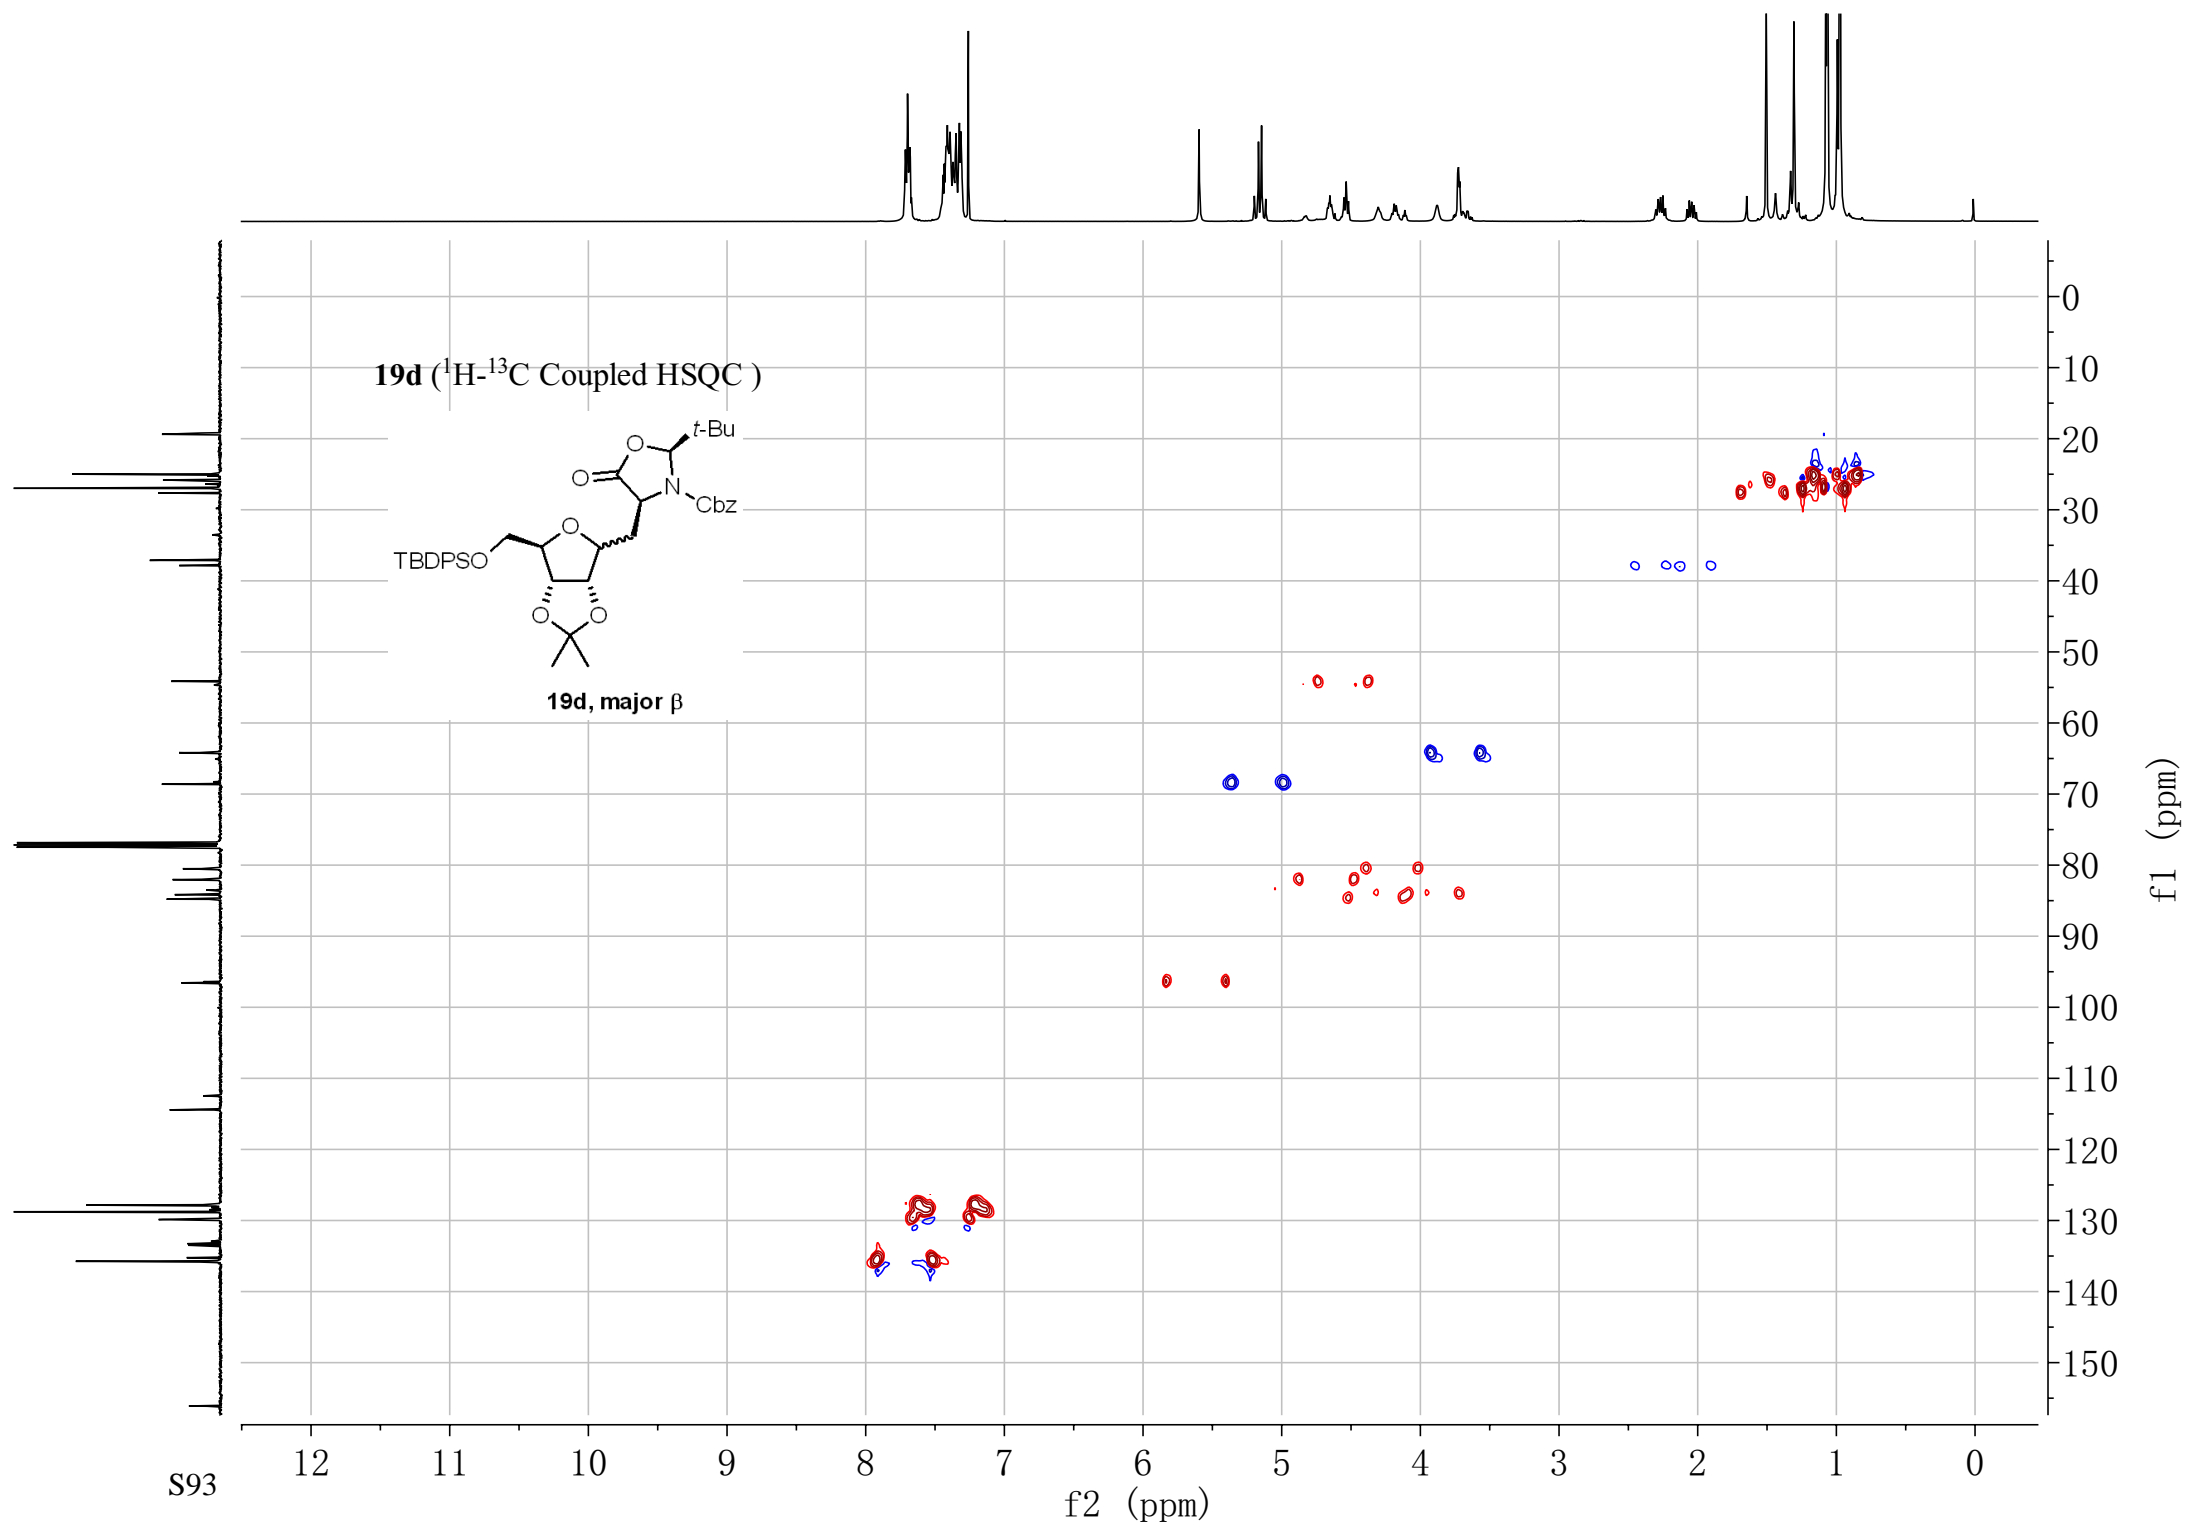



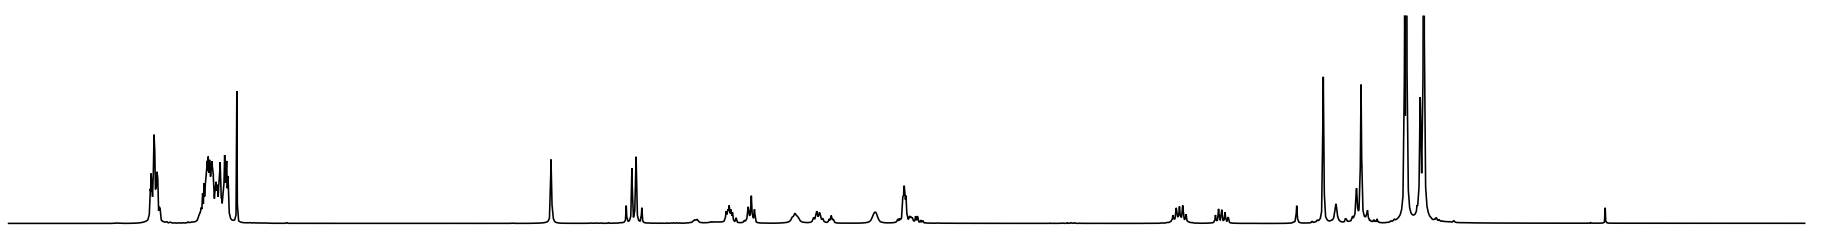

**19d** ( $^1\text{H}$ - $^{13}\text{C}$  HSQC)

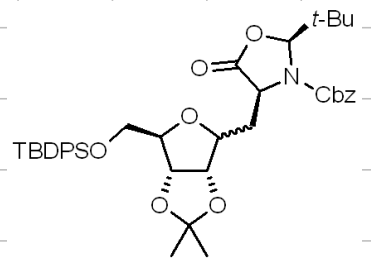

**19d, major  $\beta$**

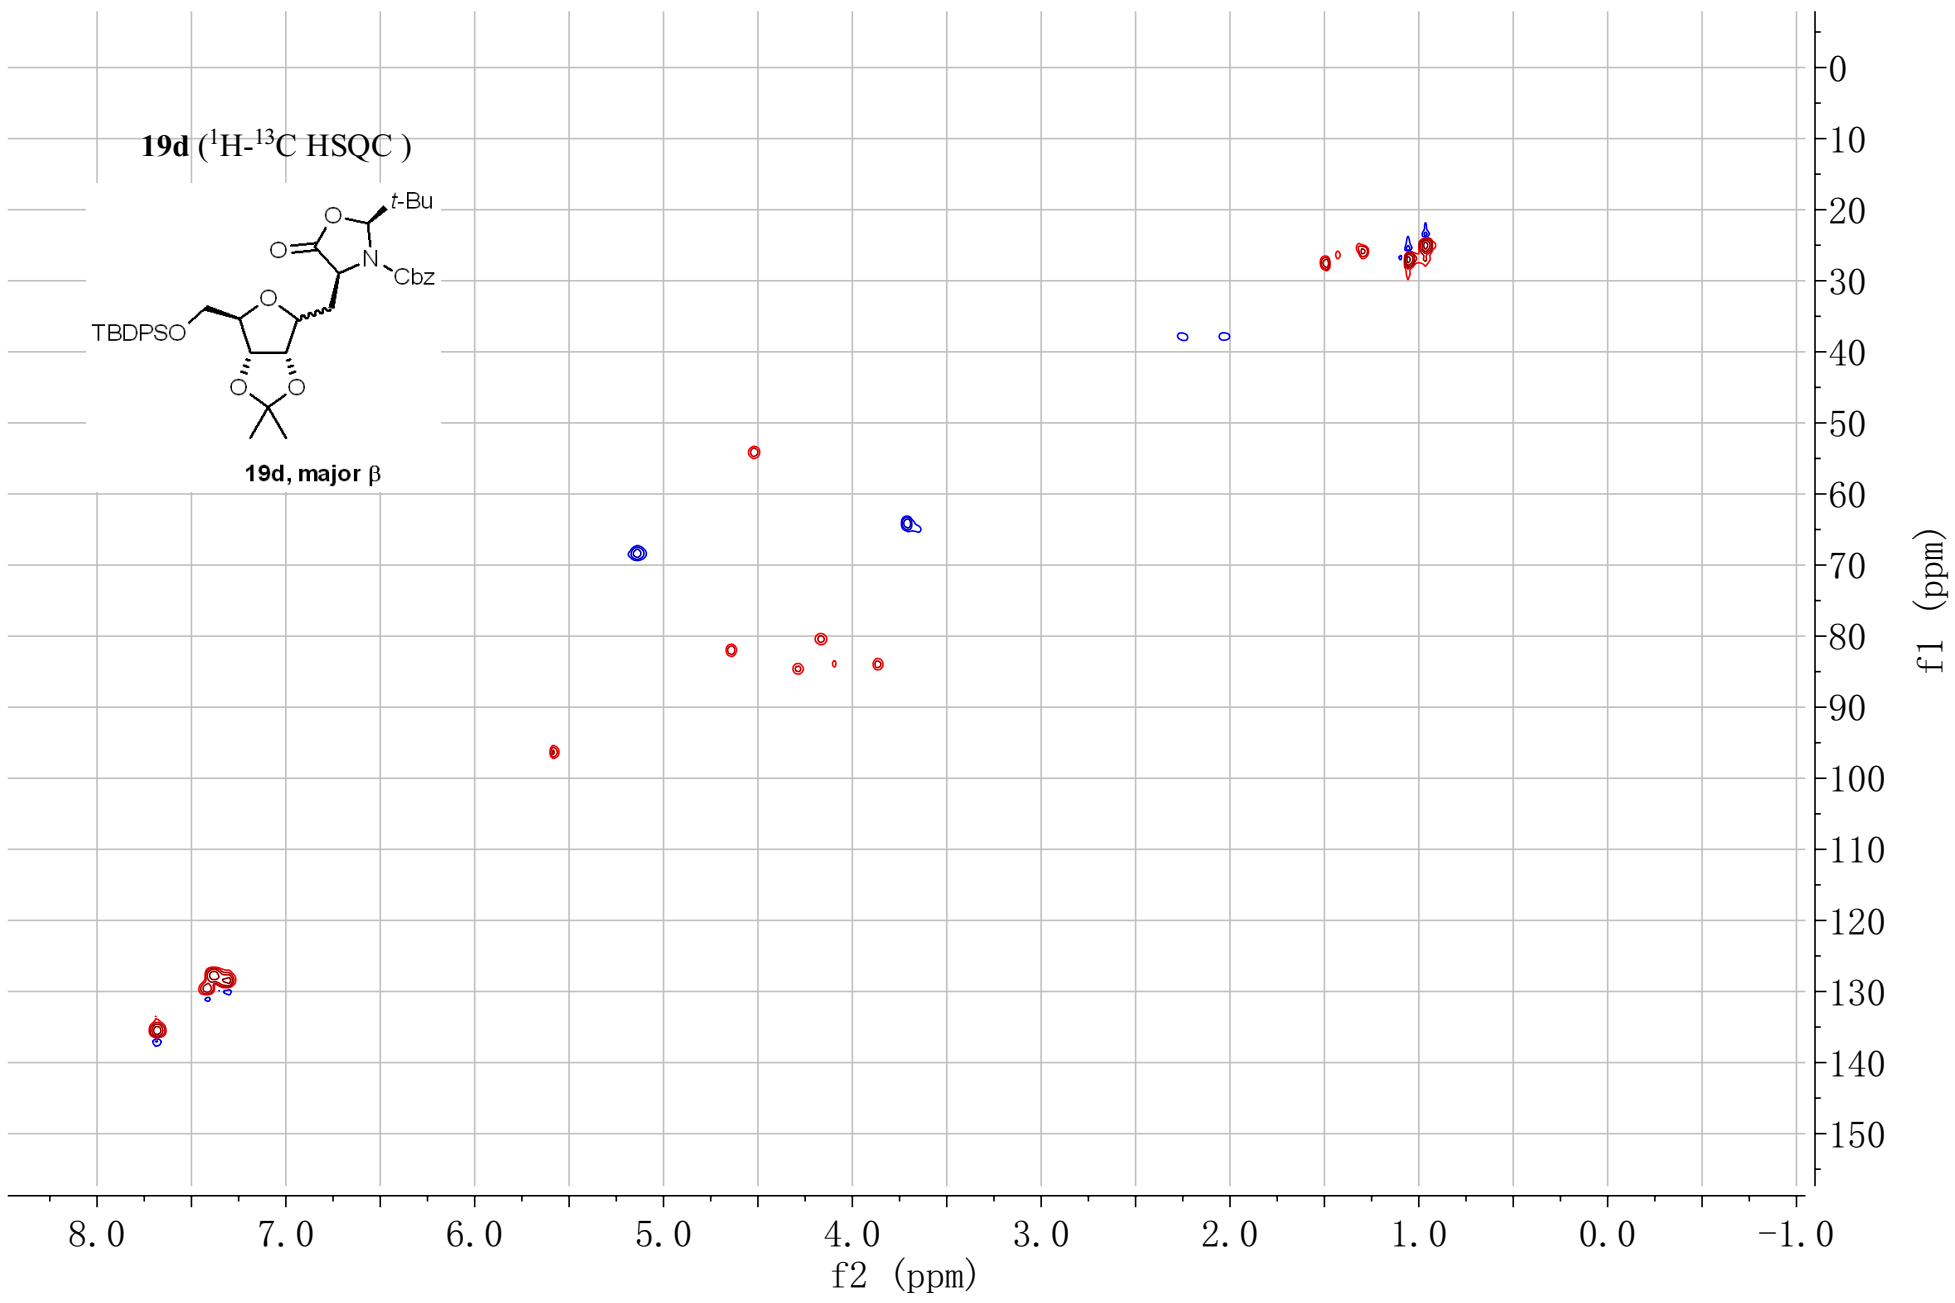

S94

f2 (ppm)

f1 (ppm)

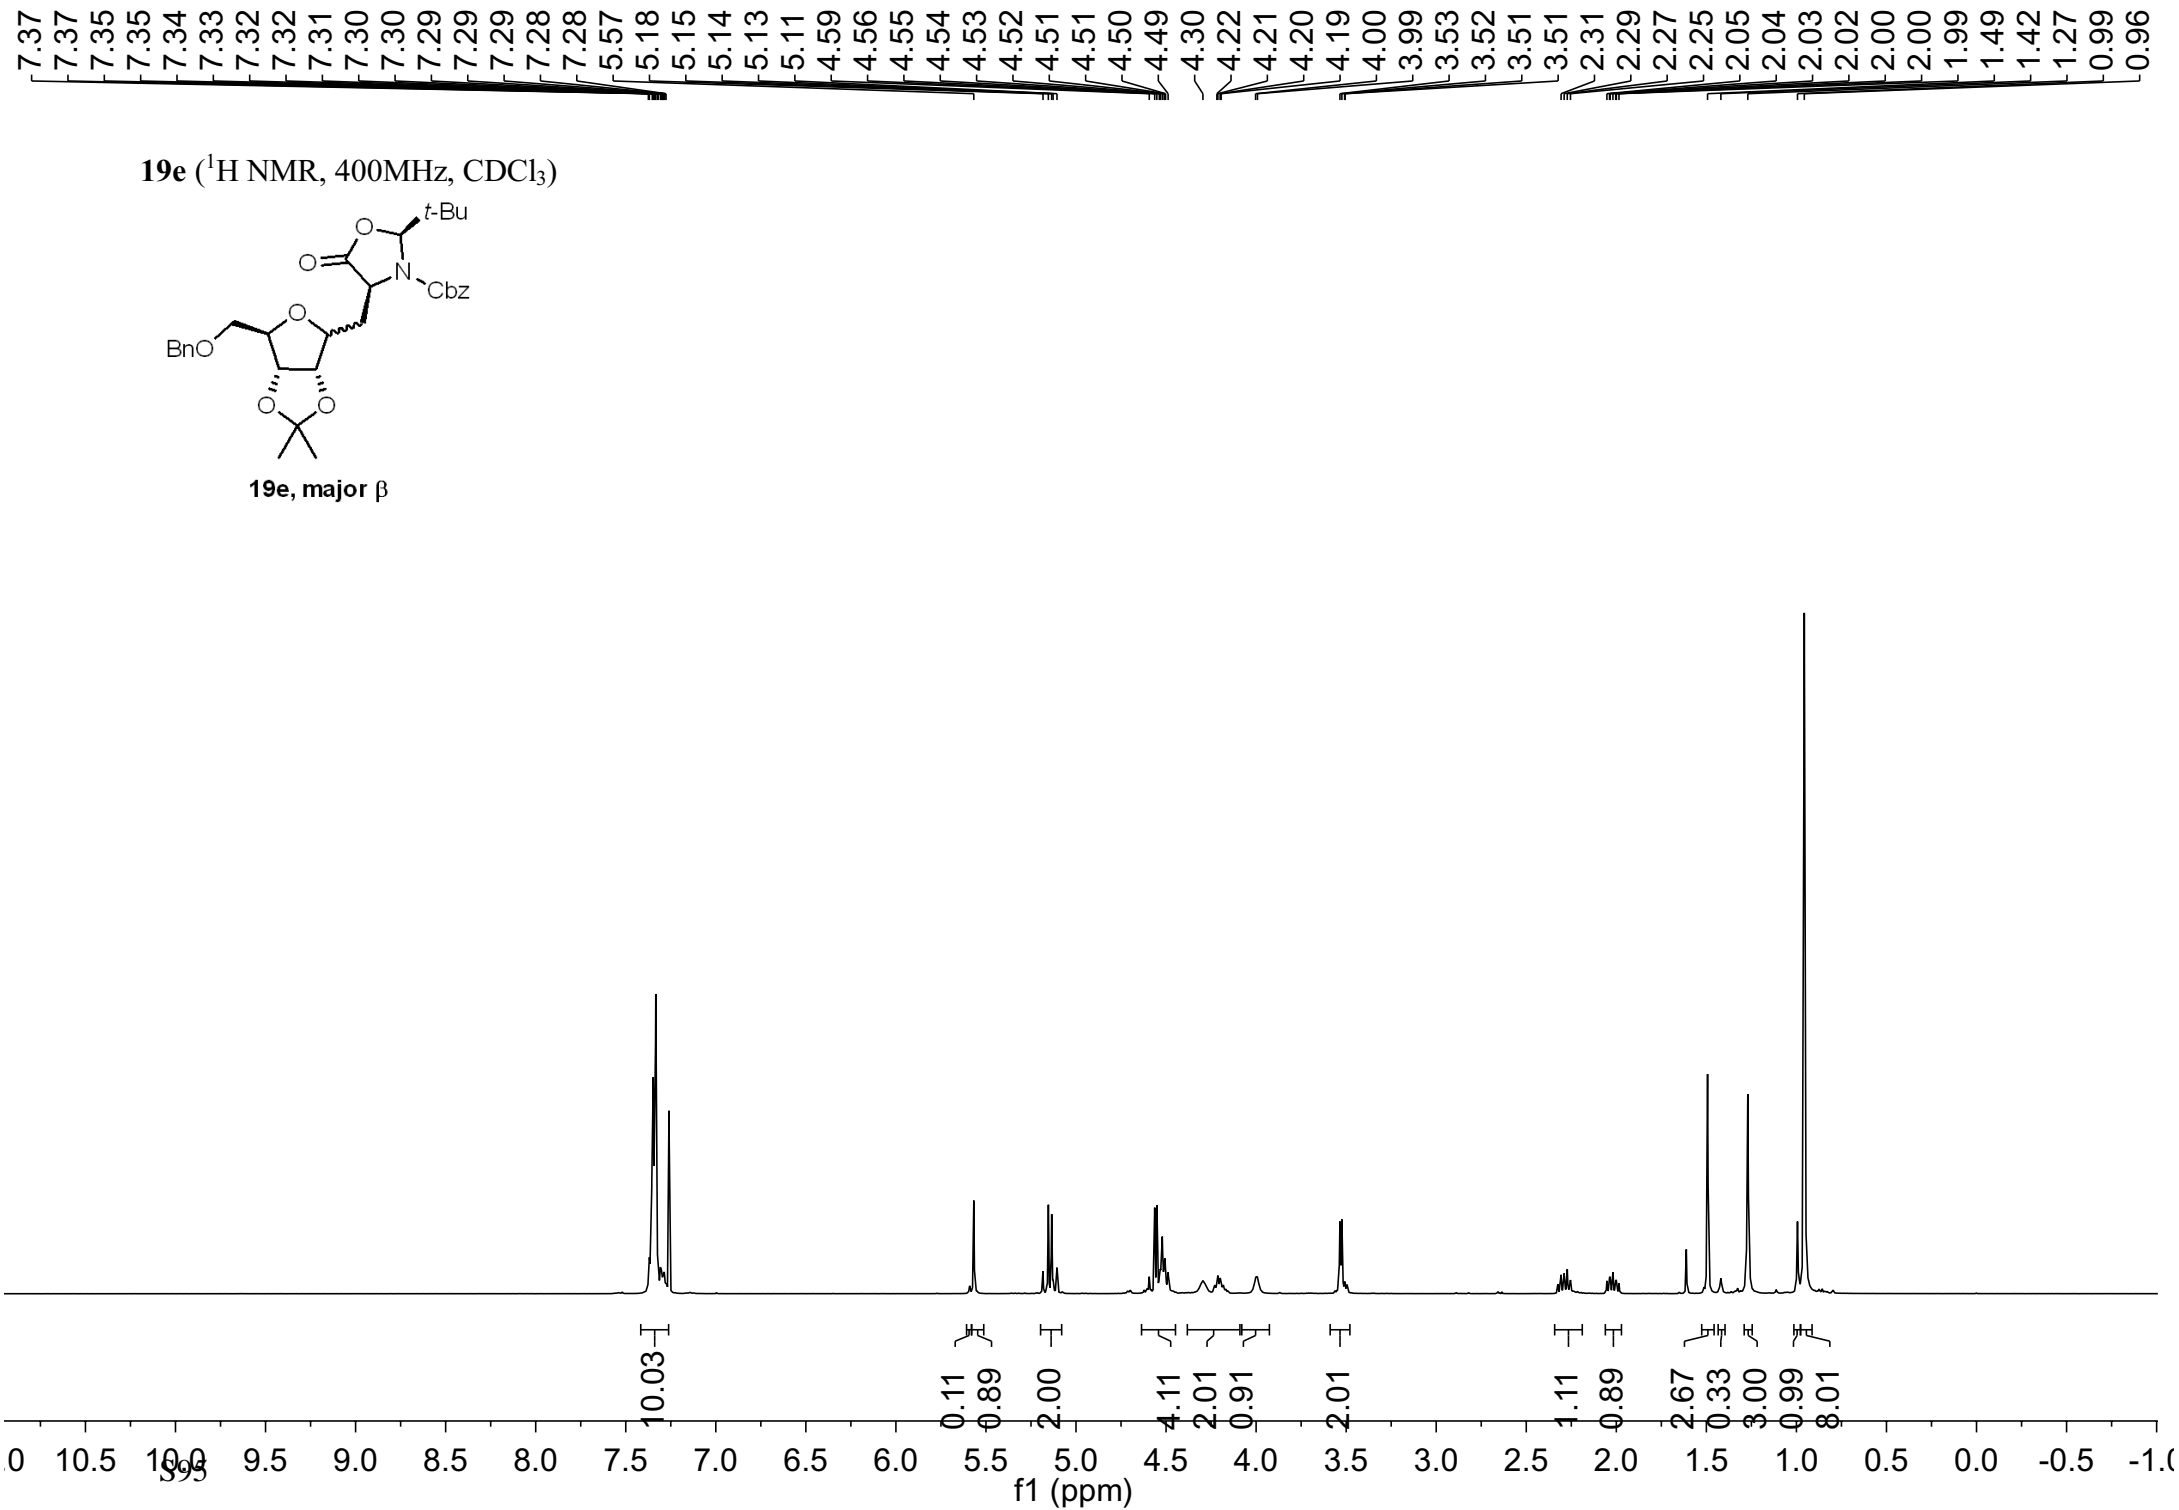

**19e** ( $^1\text{H}$  NMR, 400MHz,  $\text{CDCl}_3$ )

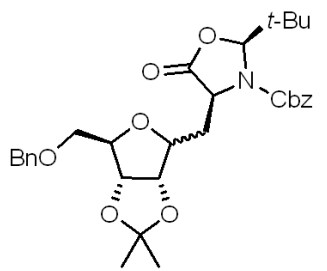

**19e**, major  $\beta$

**19e** ( $^{13}\text{C}$  NMR, 101MHz,  $\text{CDCl}_3$ )

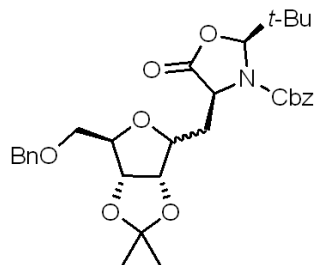

**19e, major  $\beta$**

—172.57

—156.02

138.11

135.25

128.87

128.81

128.52

127.96

127.84

—114.56

—96.52

84.81

83.27

82.59

81.05

77.48

77.16

76.84

73.74

70.61

68.65

—54.06

37.70

37.17

27.52

25.72

24.97

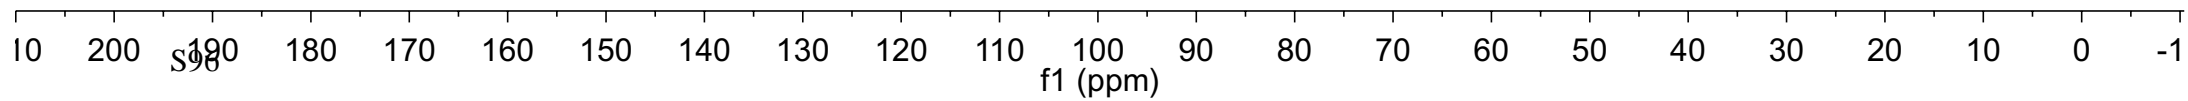

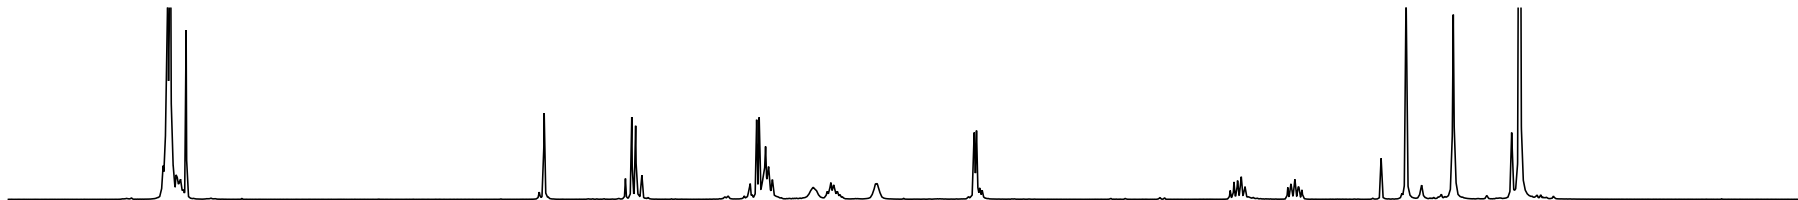

**19e** ( $^1\text{H} - ^1\text{H}$  COSY)

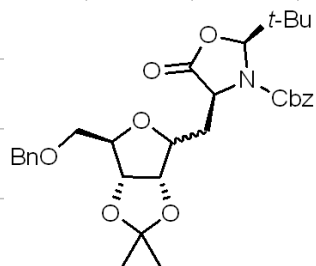

**19e**, major  $\beta$

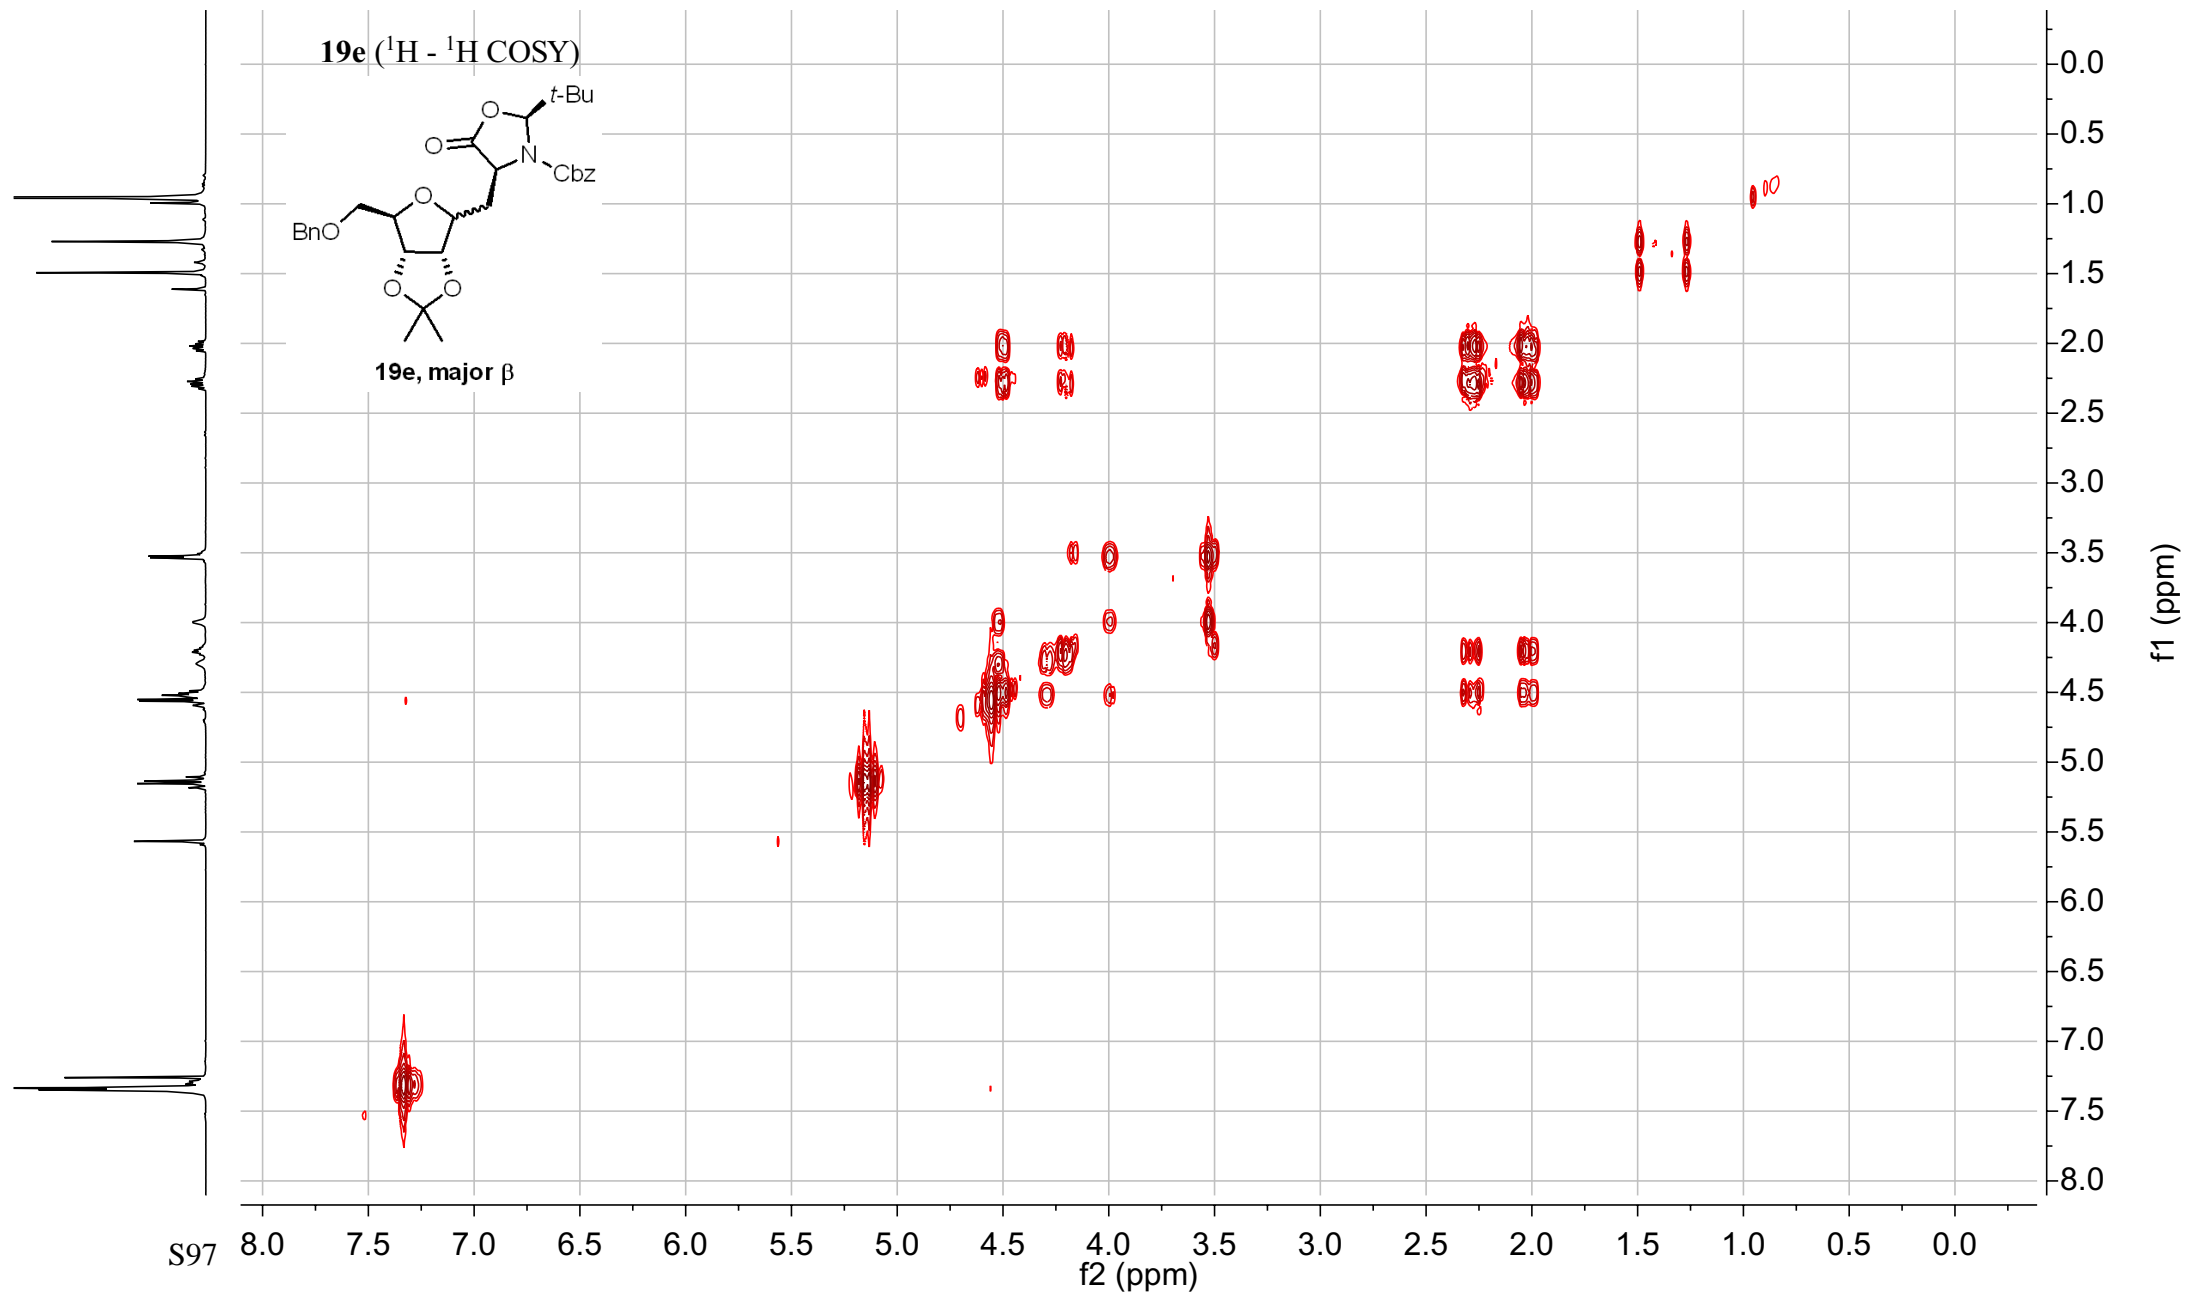

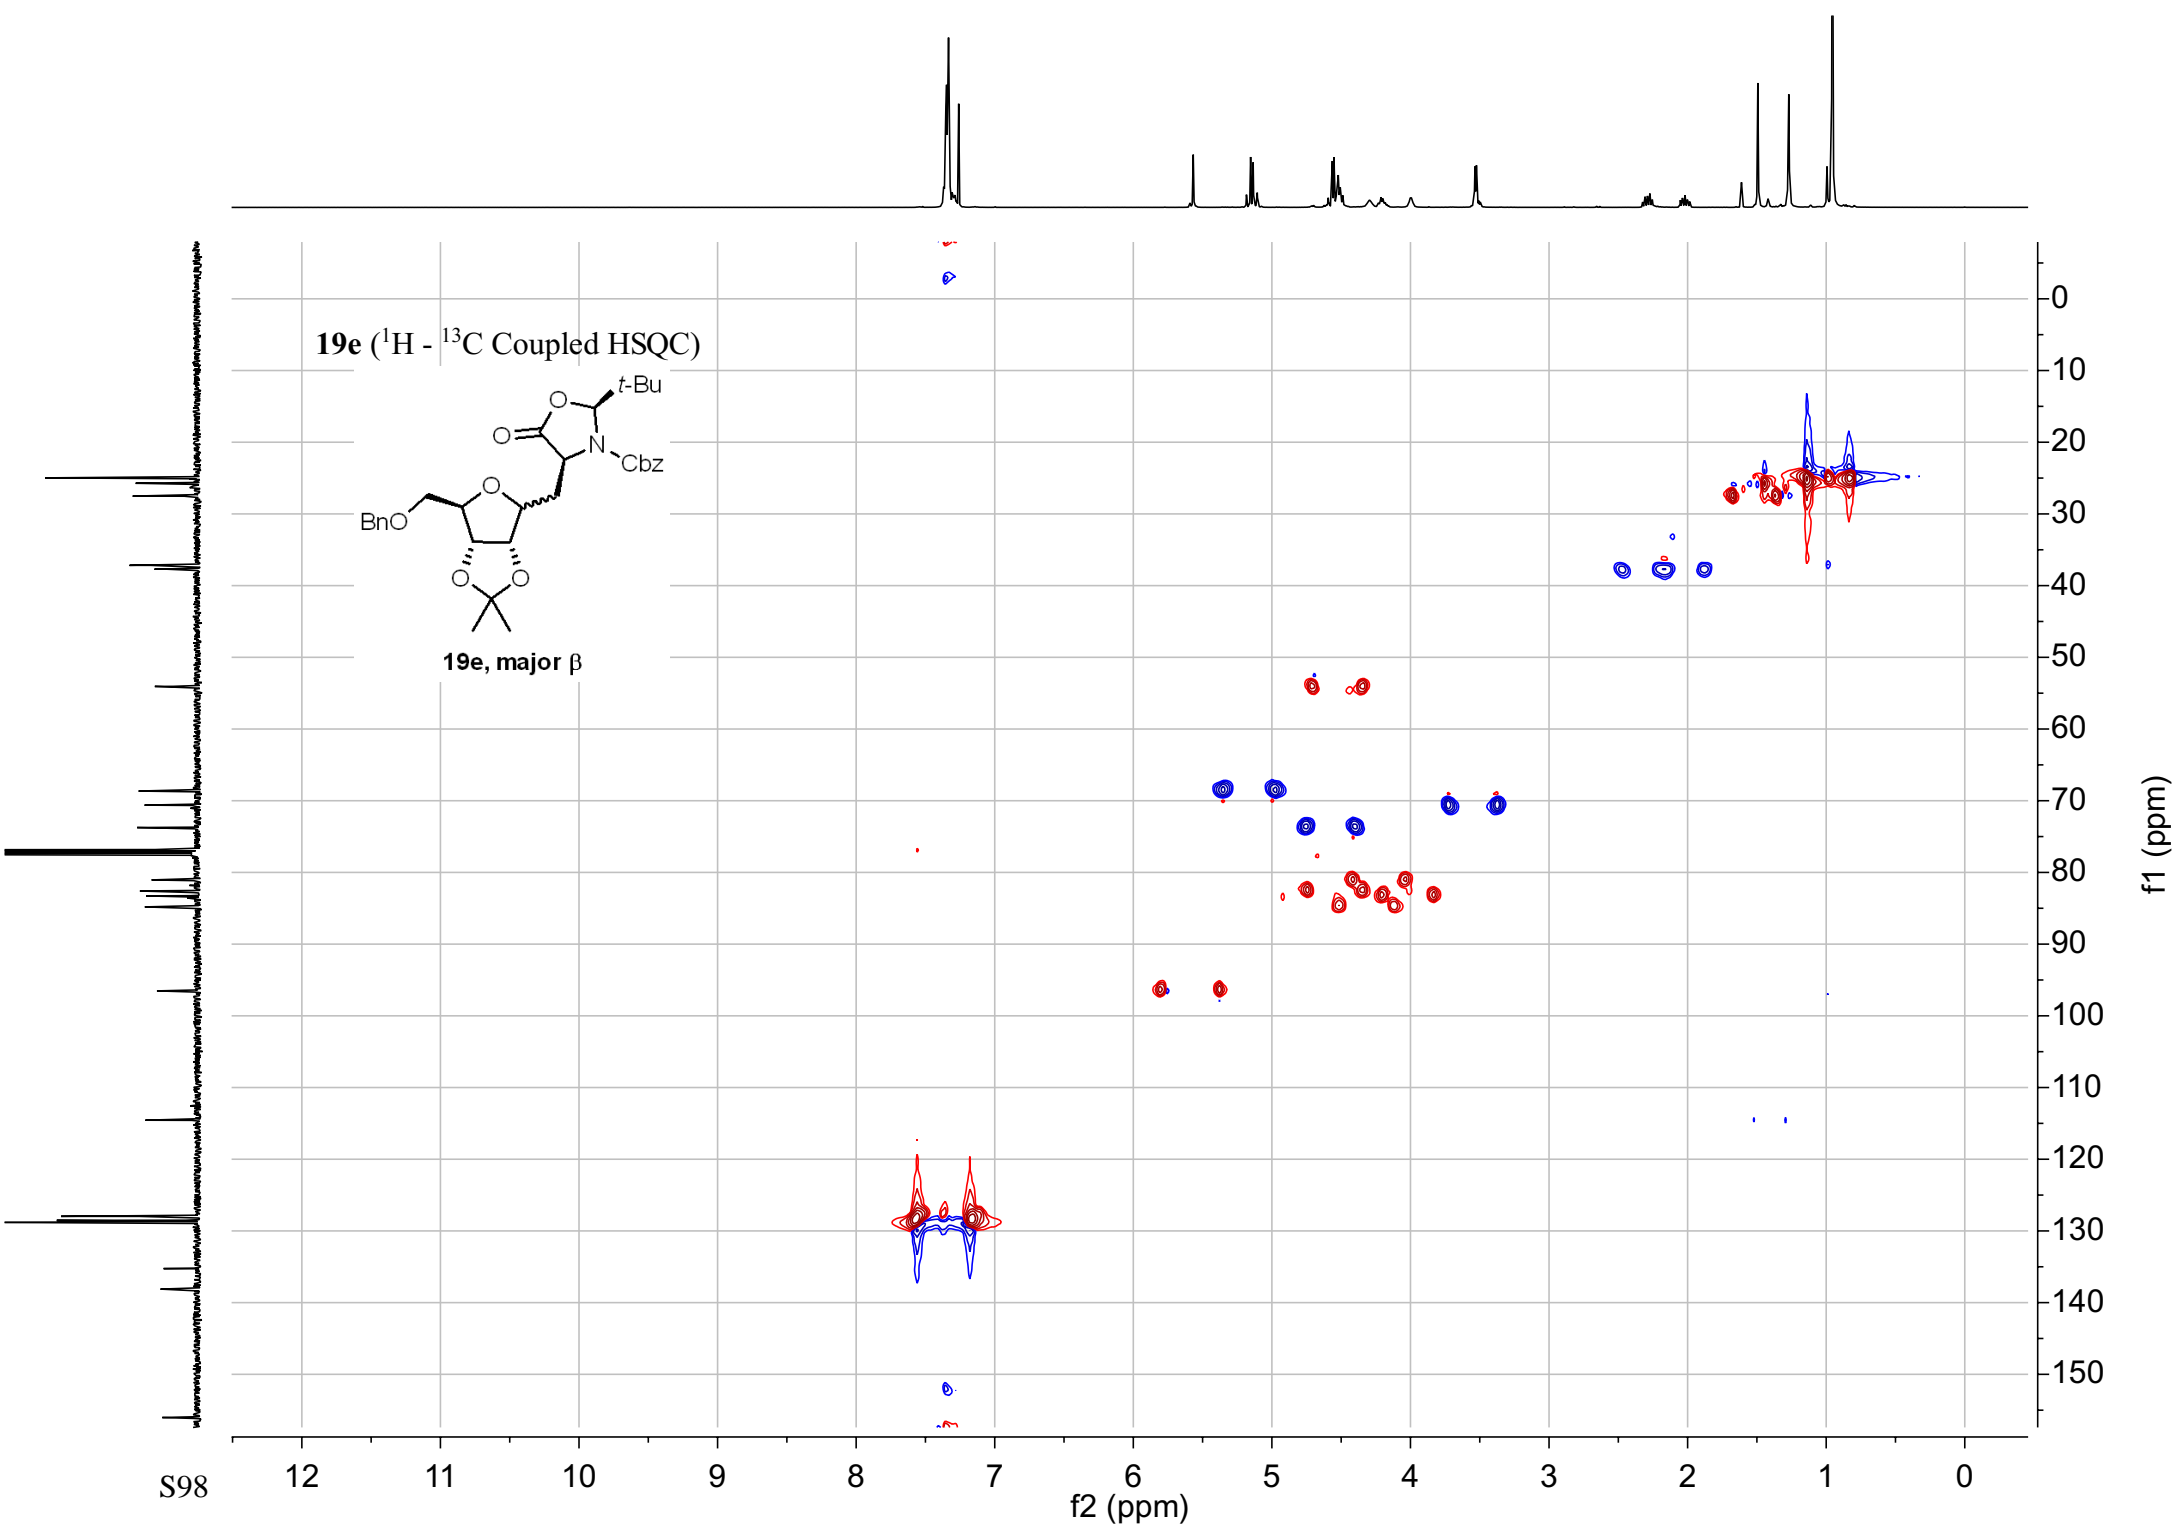

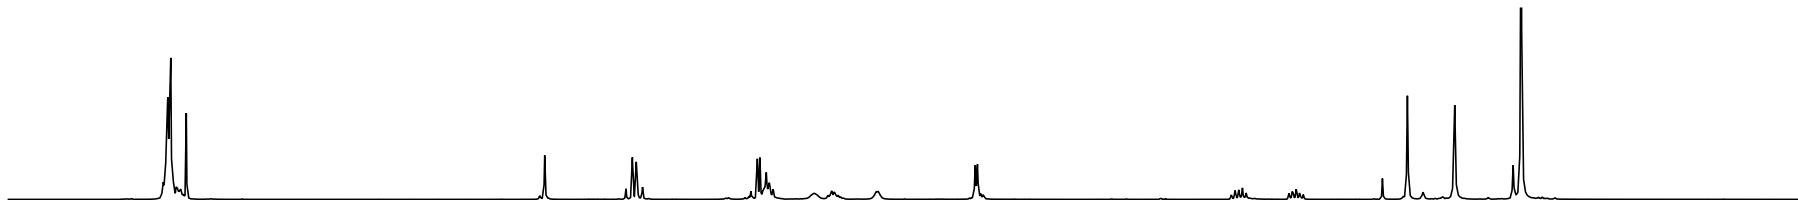

**19e** ( $^1\text{H} - ^{13}\text{C}$  HSQC)

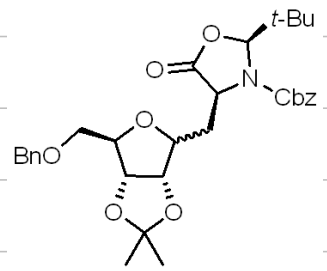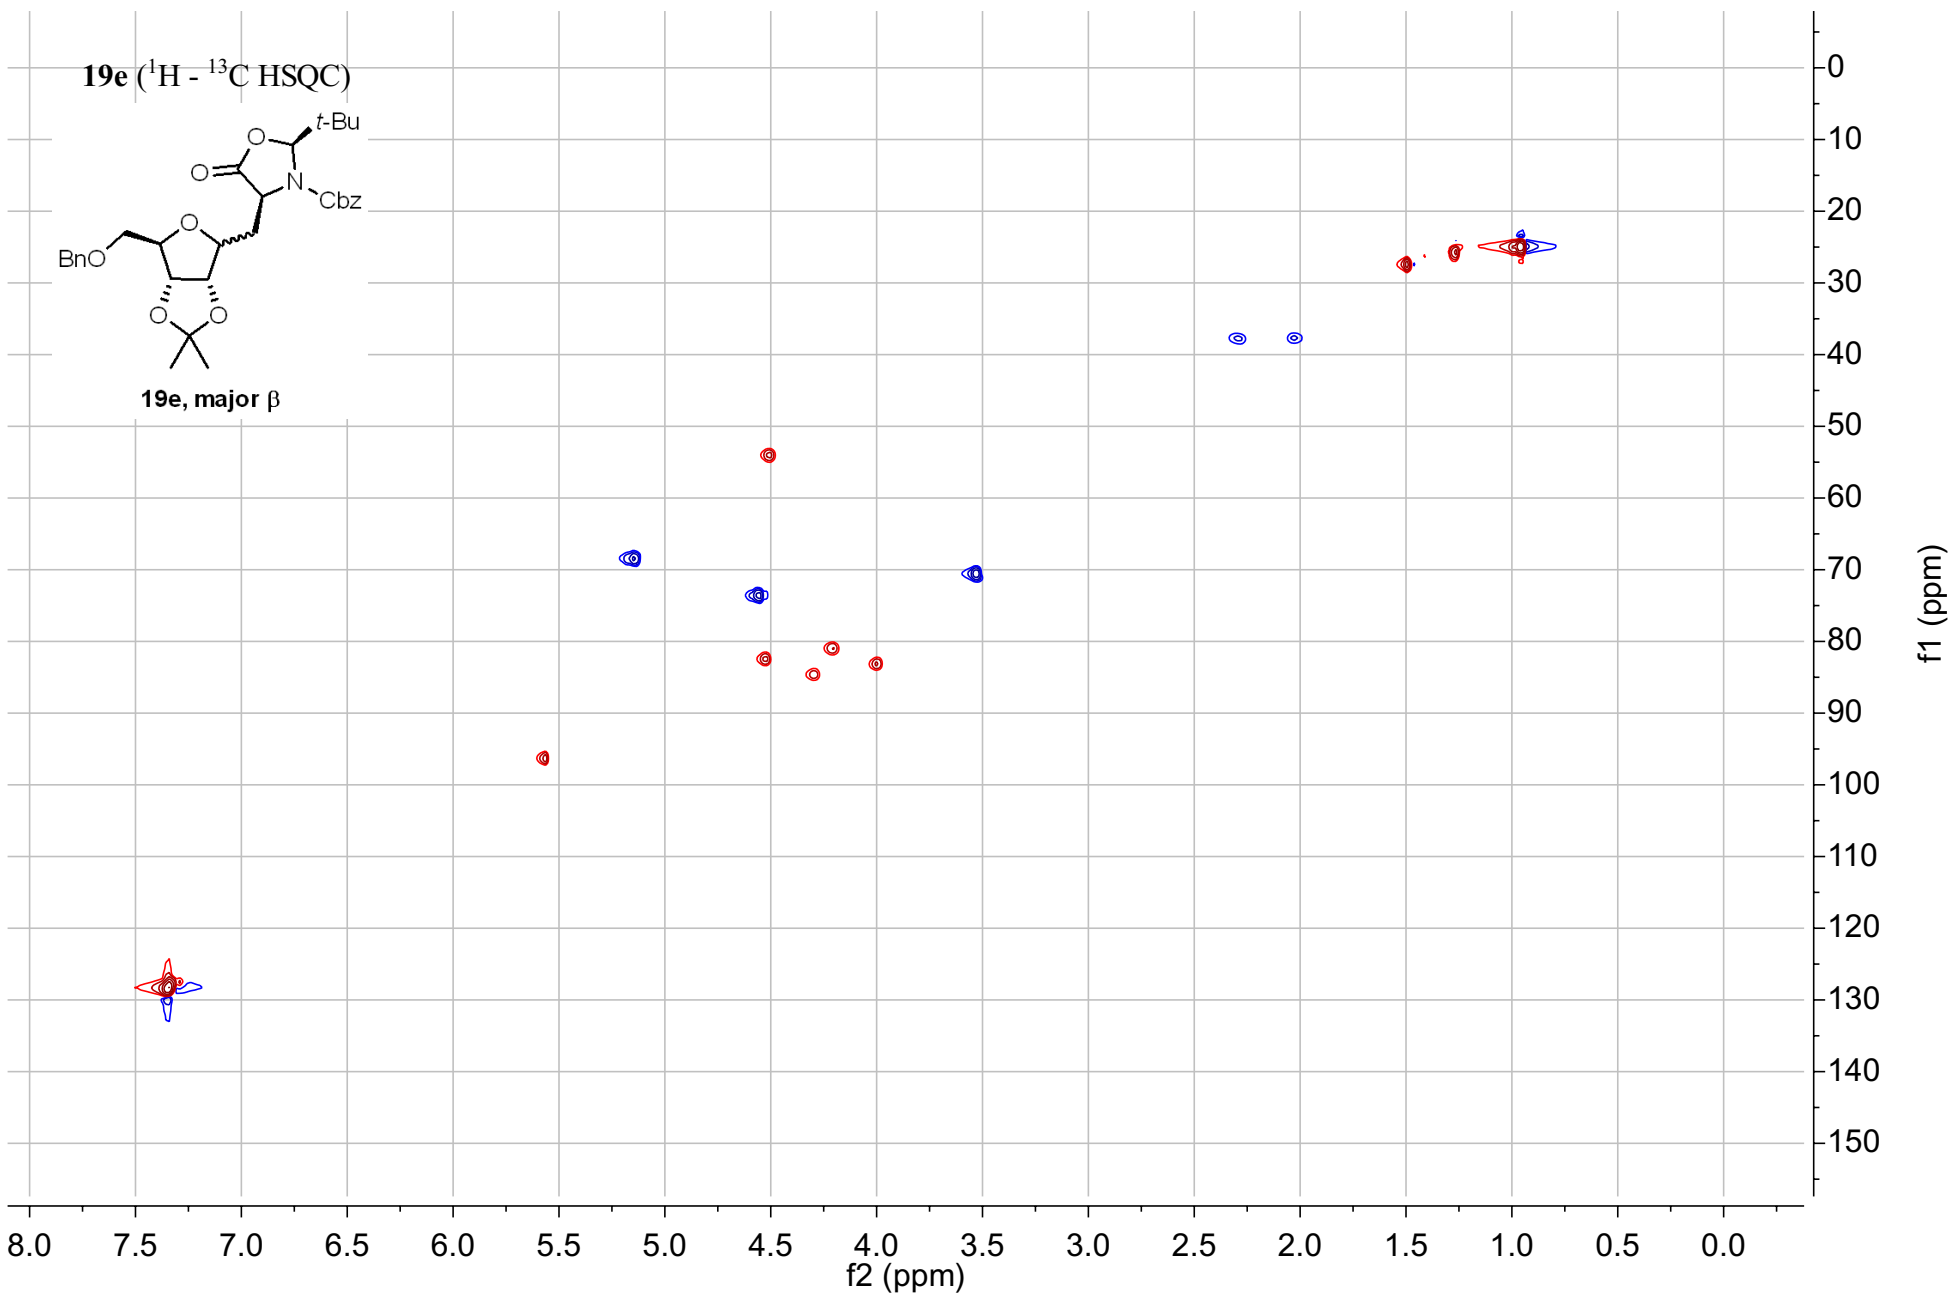

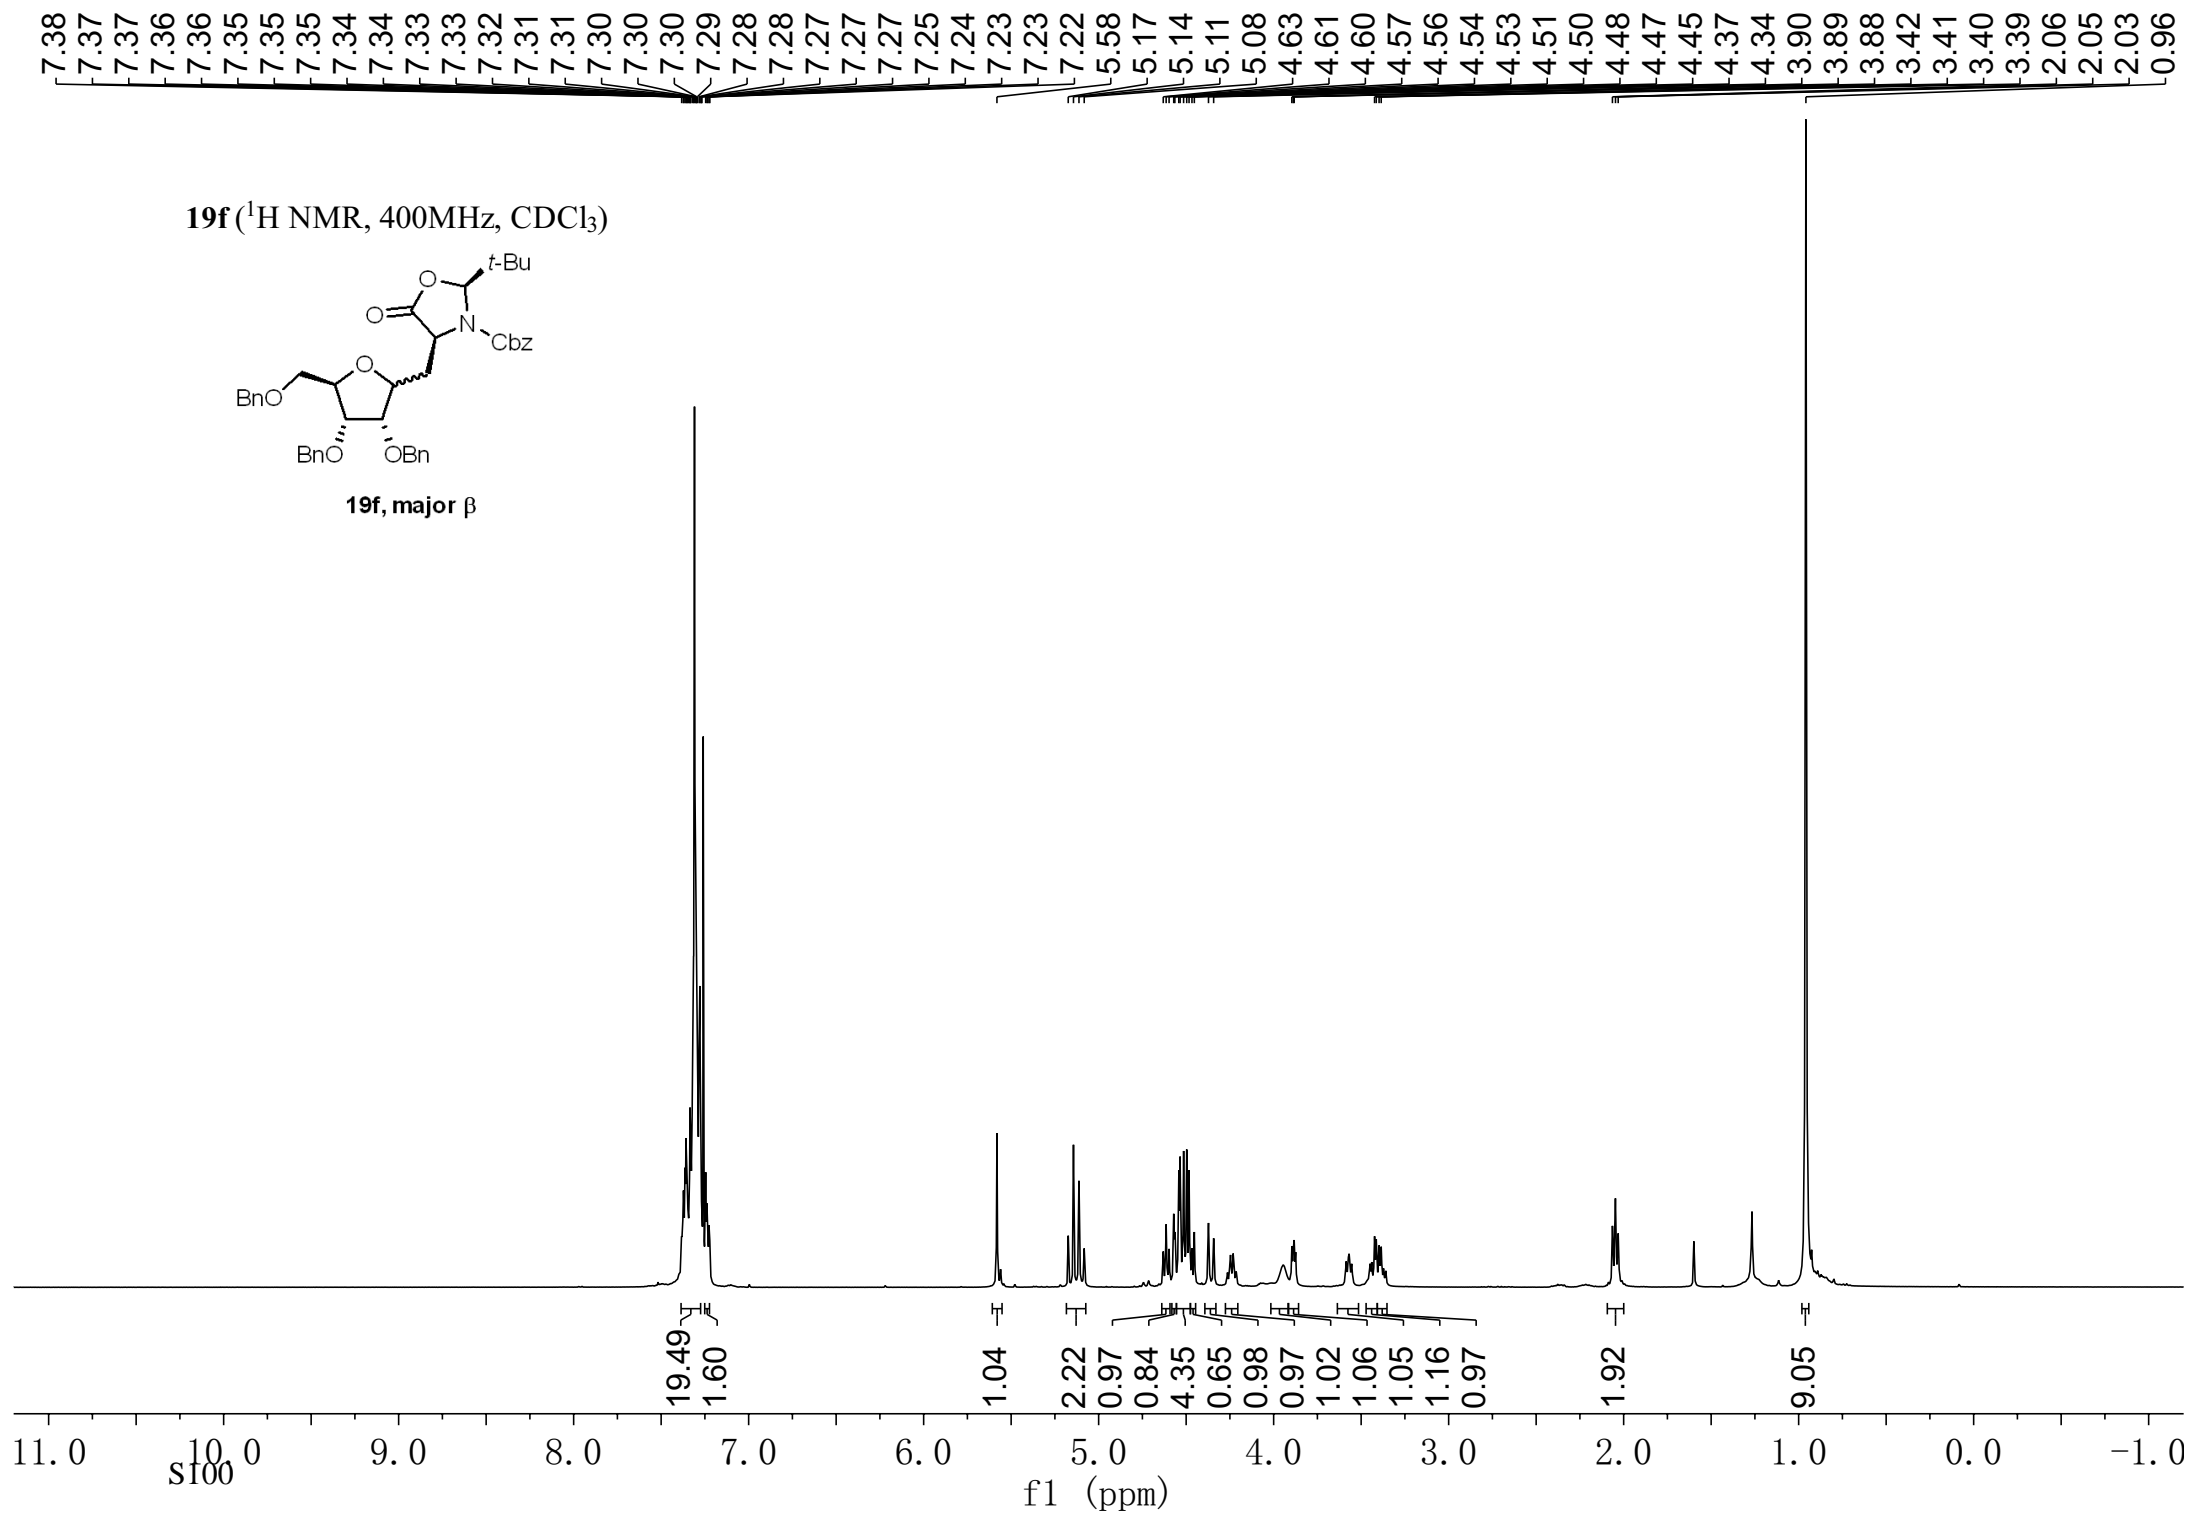

**19f** ( $^{13}\text{C}$  NMR, 101MHz,  $\text{CDCl}_3$ )

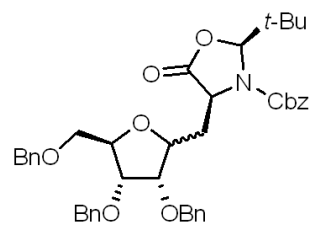

172.89  
156.31  
138.27  
137.97  
137.92  
135.38  
128.78  
128.69  
128.60  
128.51  
128.48  
128.46  
128.38  
127.97  
127.93  
127.91  
127.79  
96.82  
81.94  
81.33  
77.16  
76.47  
73.57  
72.16  
71.67  
70.60  
68.57  
54.48  
37.94  
37.00  
29.84  
25.10  
25.03

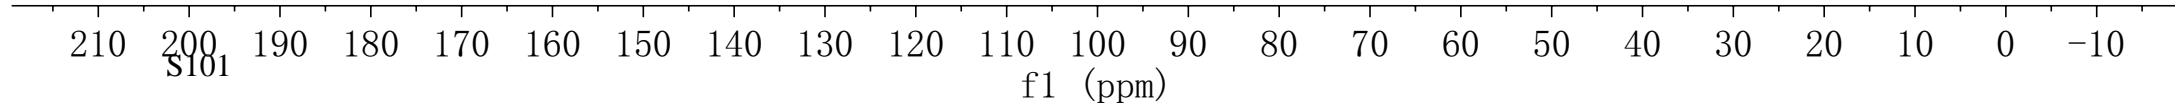



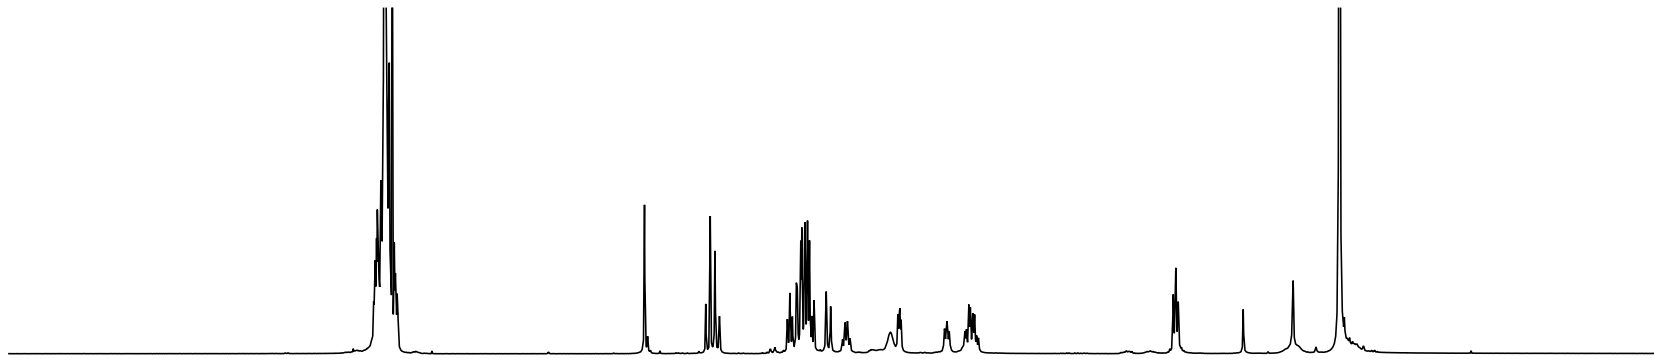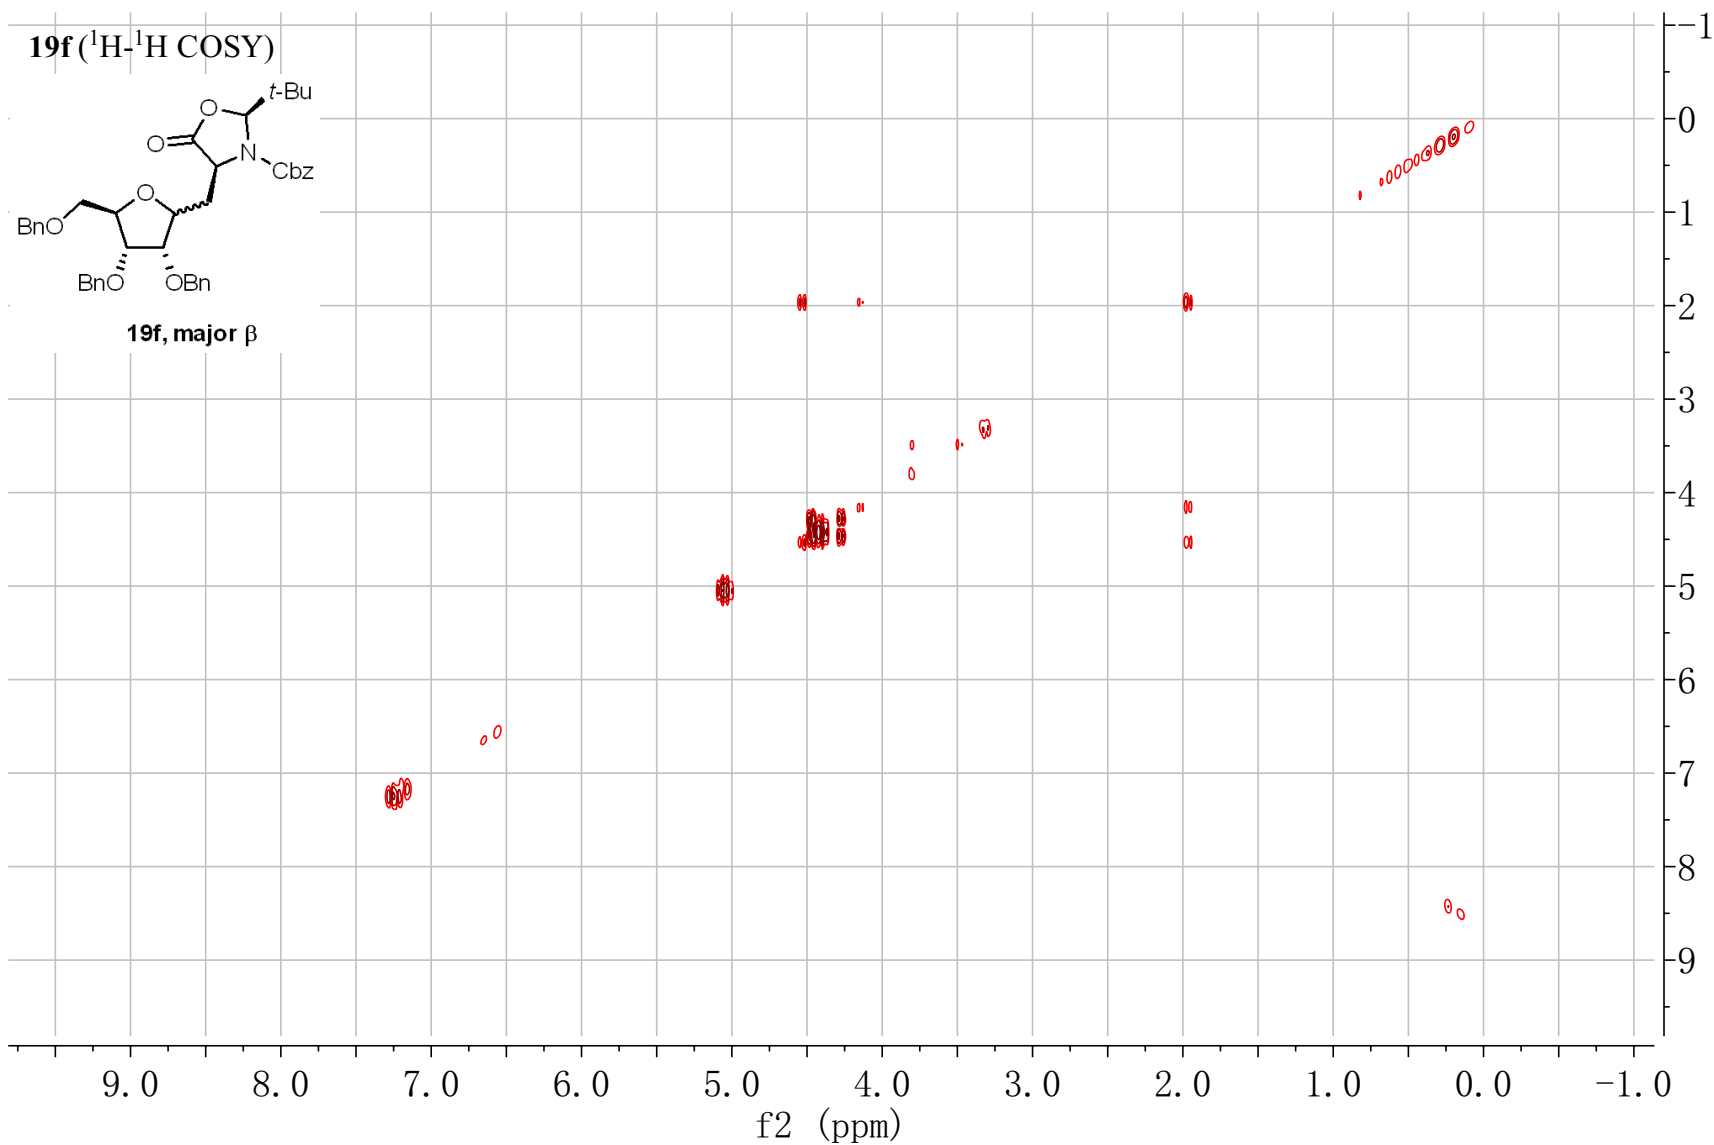

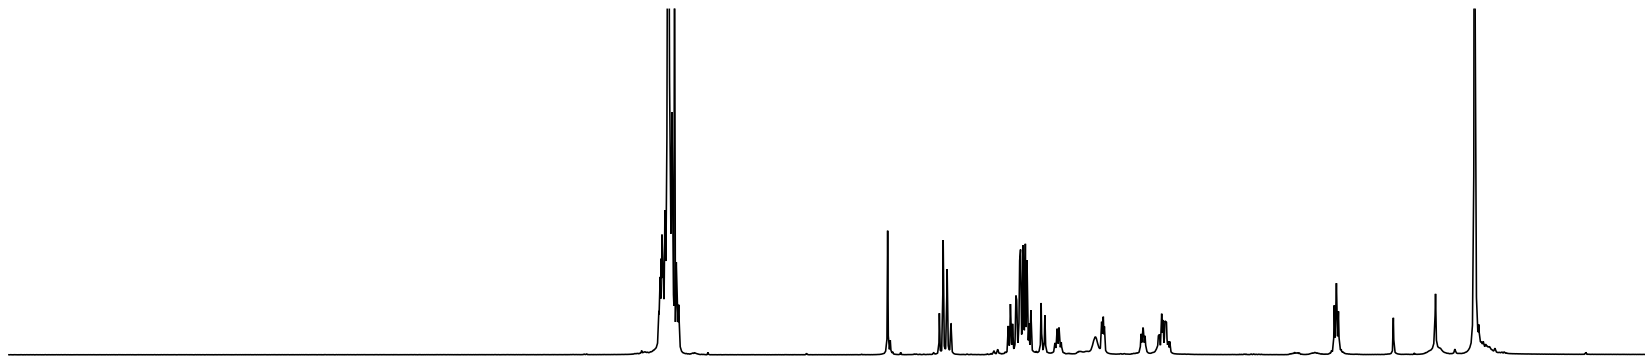

**19f** ( $^1\text{H}$ - $^{13}\text{C}$  Coupled HSQC)

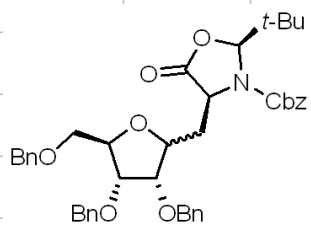

**19f**, major  $\beta$

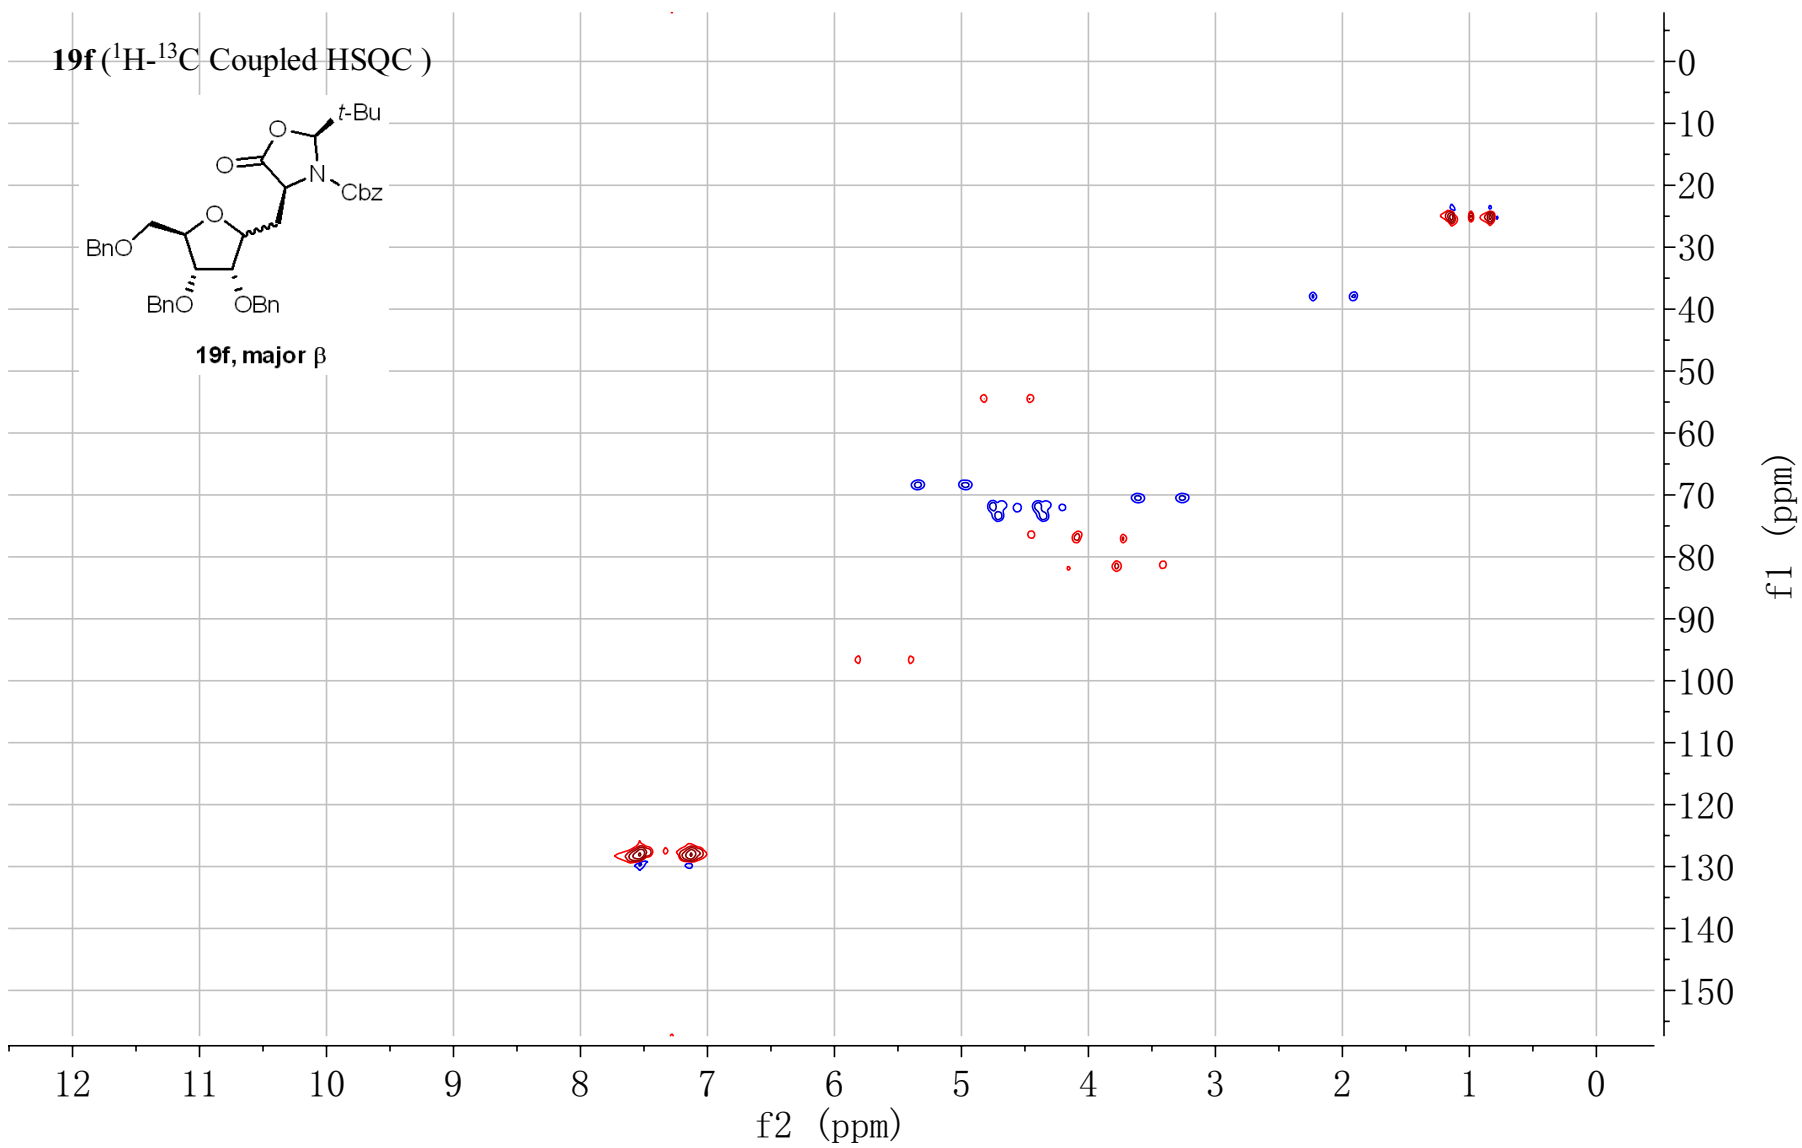

S103

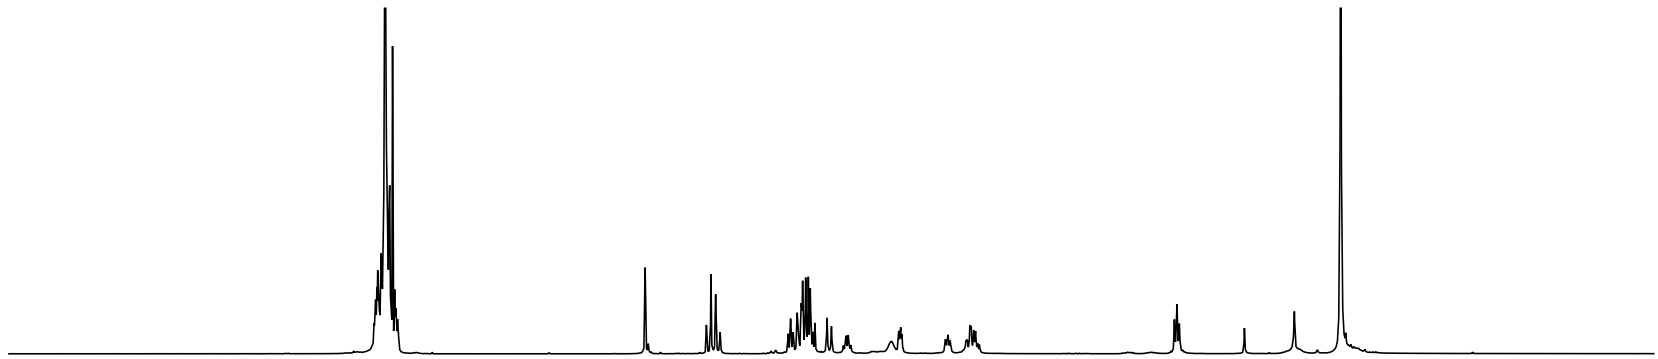

19f (<sup>1</sup>H-<sup>13</sup>C HSQC)

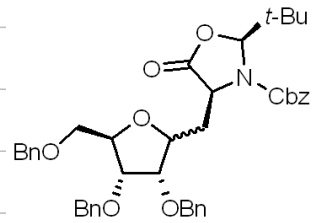

19f, major β

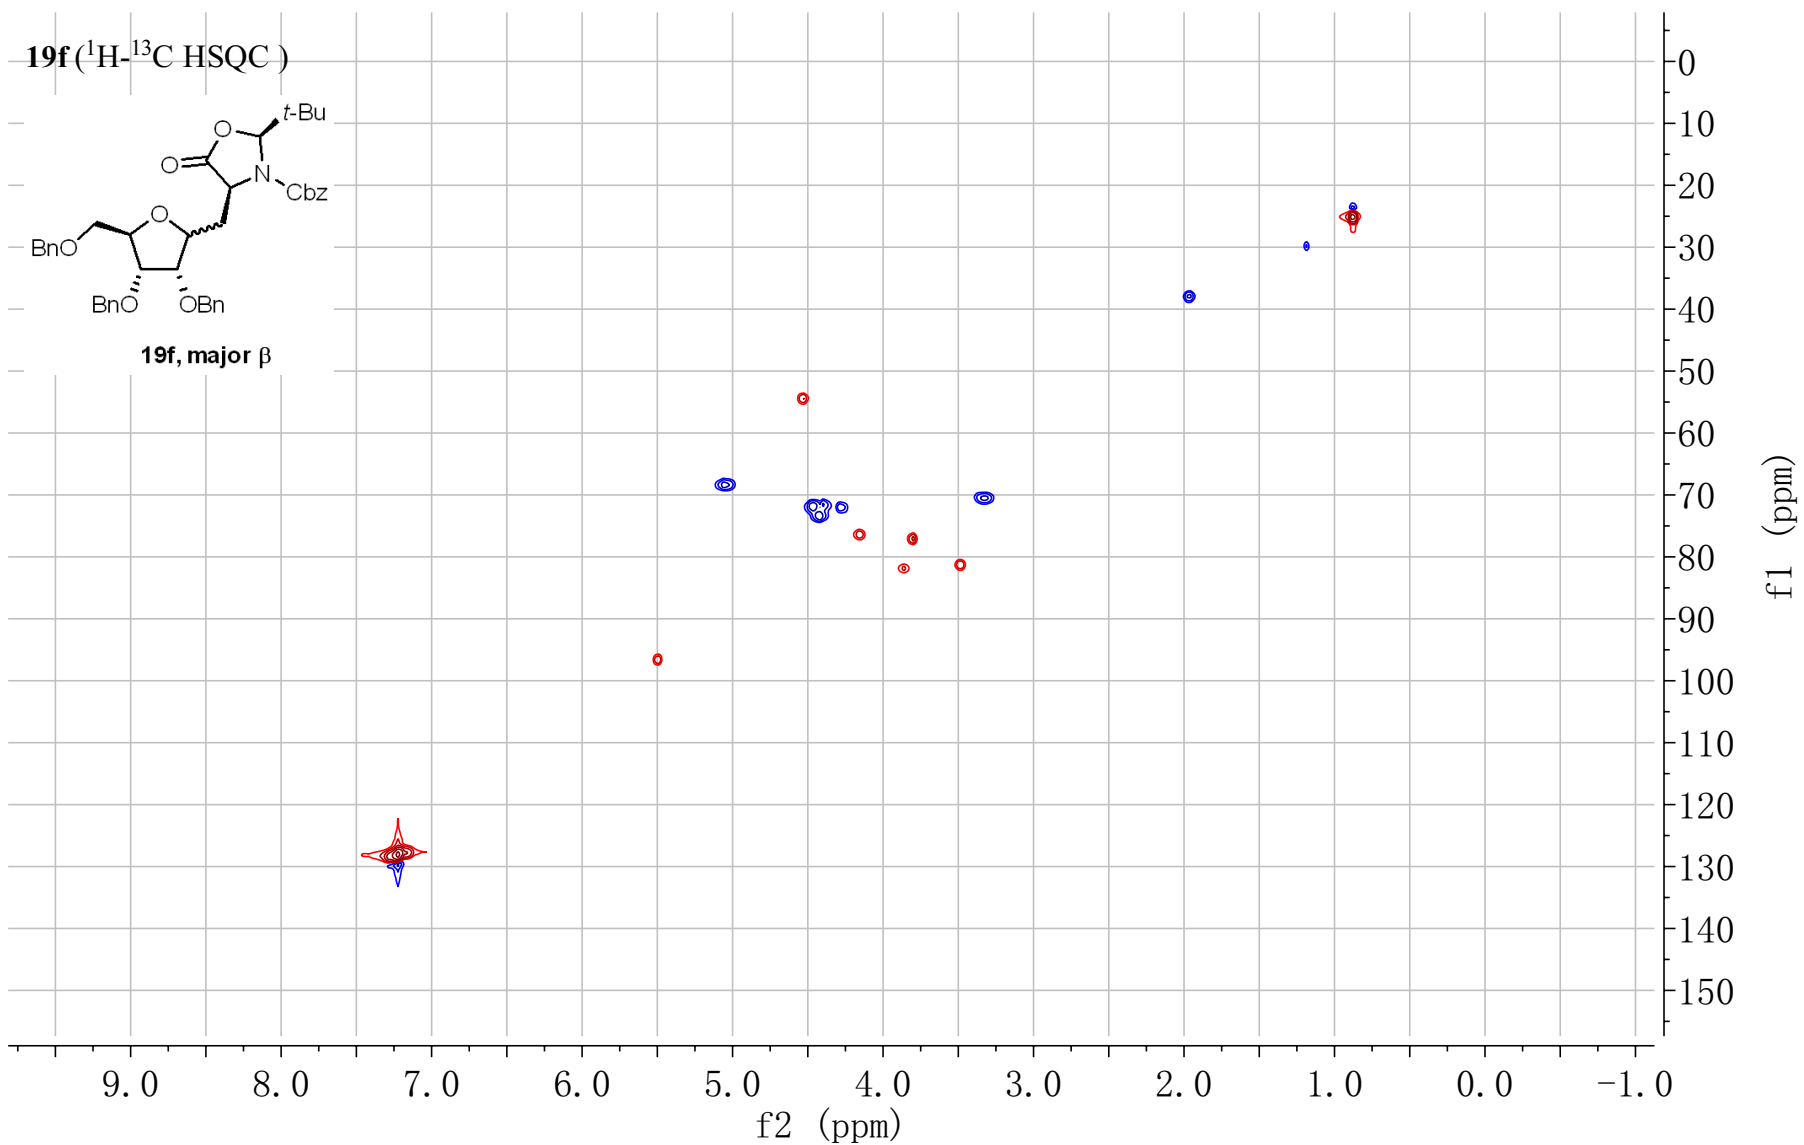

S104

7.37  
7.36  
7.36  
7.34  
7.33  
7.33  
7.32  
7.32  
7.32  
7.31  
7.30  
7.30  
7.29  
7.27  
7.27  
7.25  
7.25  
5.58  
5.18  
5.15  
5.12  
5.09  
4.62  
4.59  
4.56  
4.55  
4.52  
4.51  
4.50  
4.48  
4.47  
4.46  
4.44  
4.42  
4.39  
4.21  
4.21  
4.17  
4.15  
3.99  
3.99  
3.98  
3.98  
3.92  
3.91  
3.91  
3.80  
3.79  
3.78  
3.77  
3.71  
3.69  
3.68  
2.36  
2.34  
2.08  
2.06  
2.05  
0.97

**19g** (<sup>1</sup>H NMR, 400MHz, CDCl<sub>3</sub>)

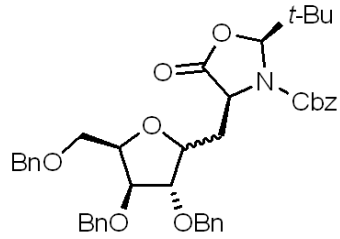

**19g, major β**

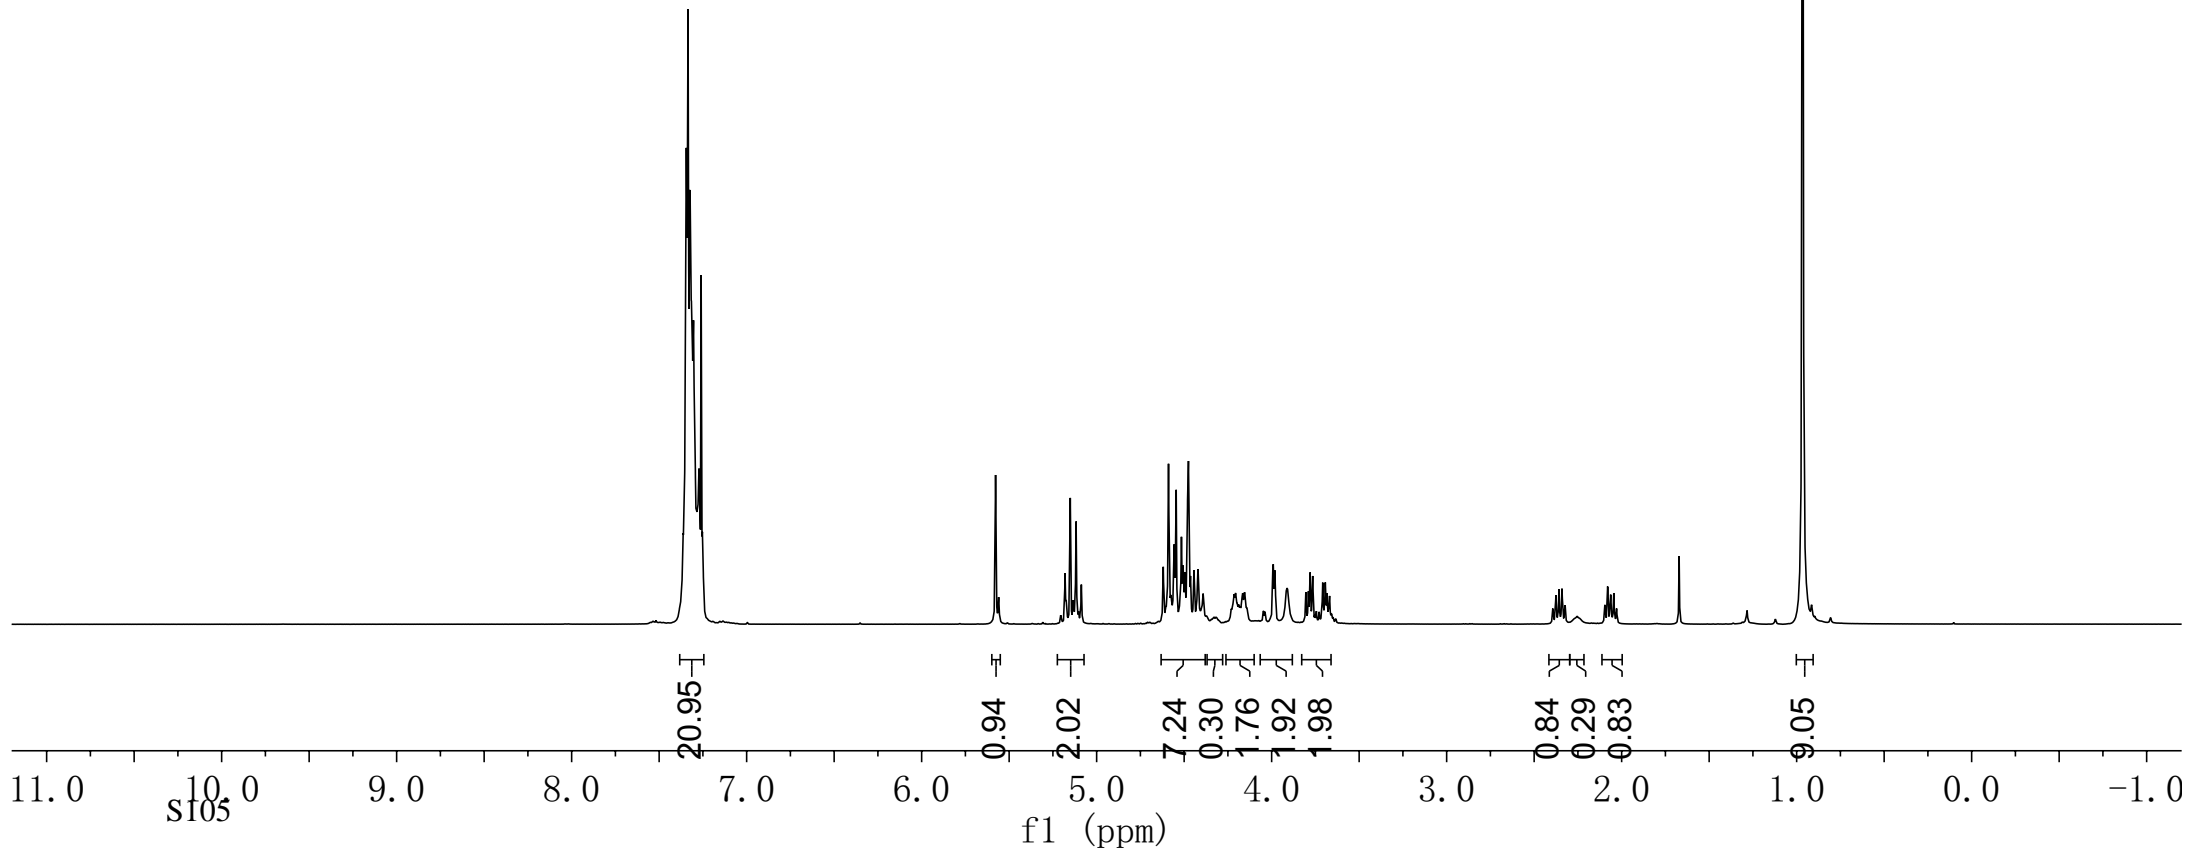

172.64  
172.53  
156.09  
156.01  
138.39  
138.32  
138.04  
137.91  
137.89  
135.45  
128.74  
128.72  
128.67  
128.54  
128.53  
128.44  
127.91  
127.85  
127.82  
127.79  
127.70  
127.68  
127.57  
96.54  
96.42  
86.45  
82.62  
81.47  
79.97  
79.81  
78.61  
77.16  
73.55  
72.31  
72.01  
71.80  
71.68  
68.47  
68.40  
68.18  
54.85  
54.38  
38.11  
37.08  
37.05  
25.04

**19g** ( $^{13}\text{C}$  NMR, 101MHz,  $\text{CDCl}_3$ )

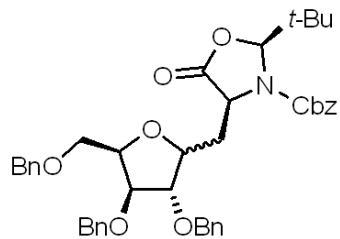

**19g**, major  $\beta$

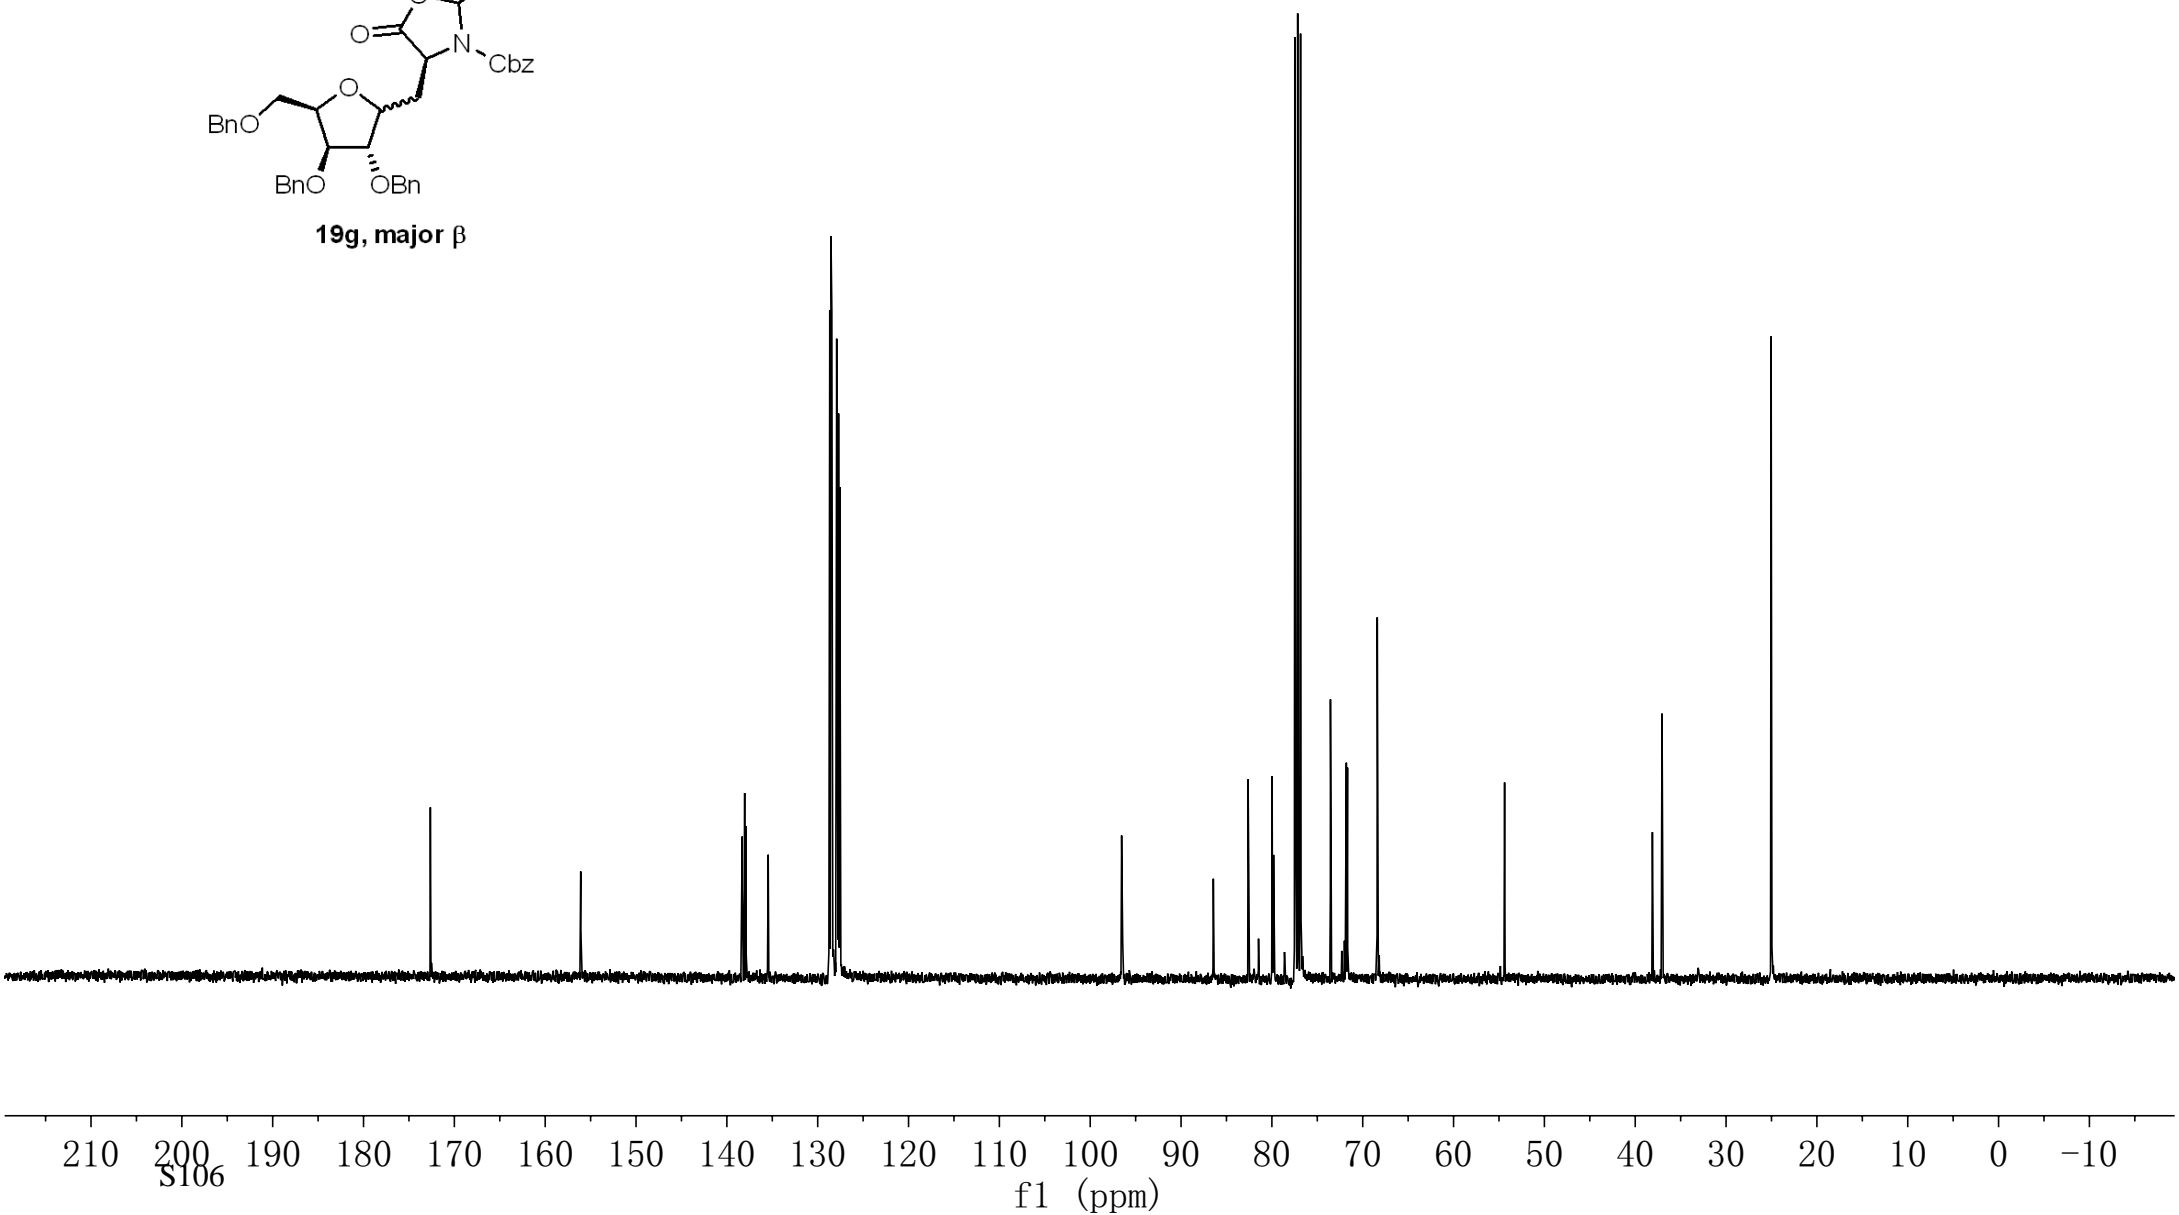

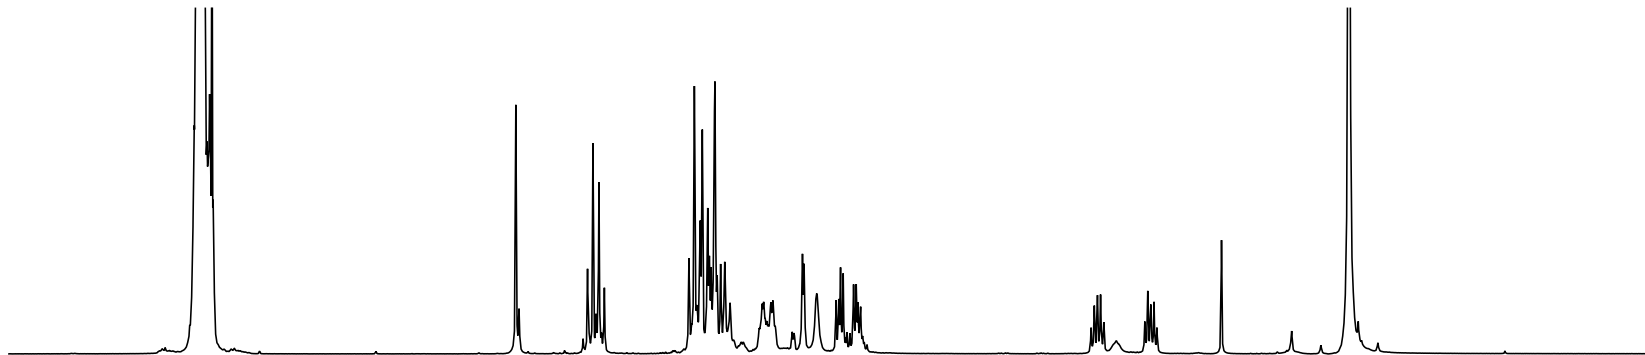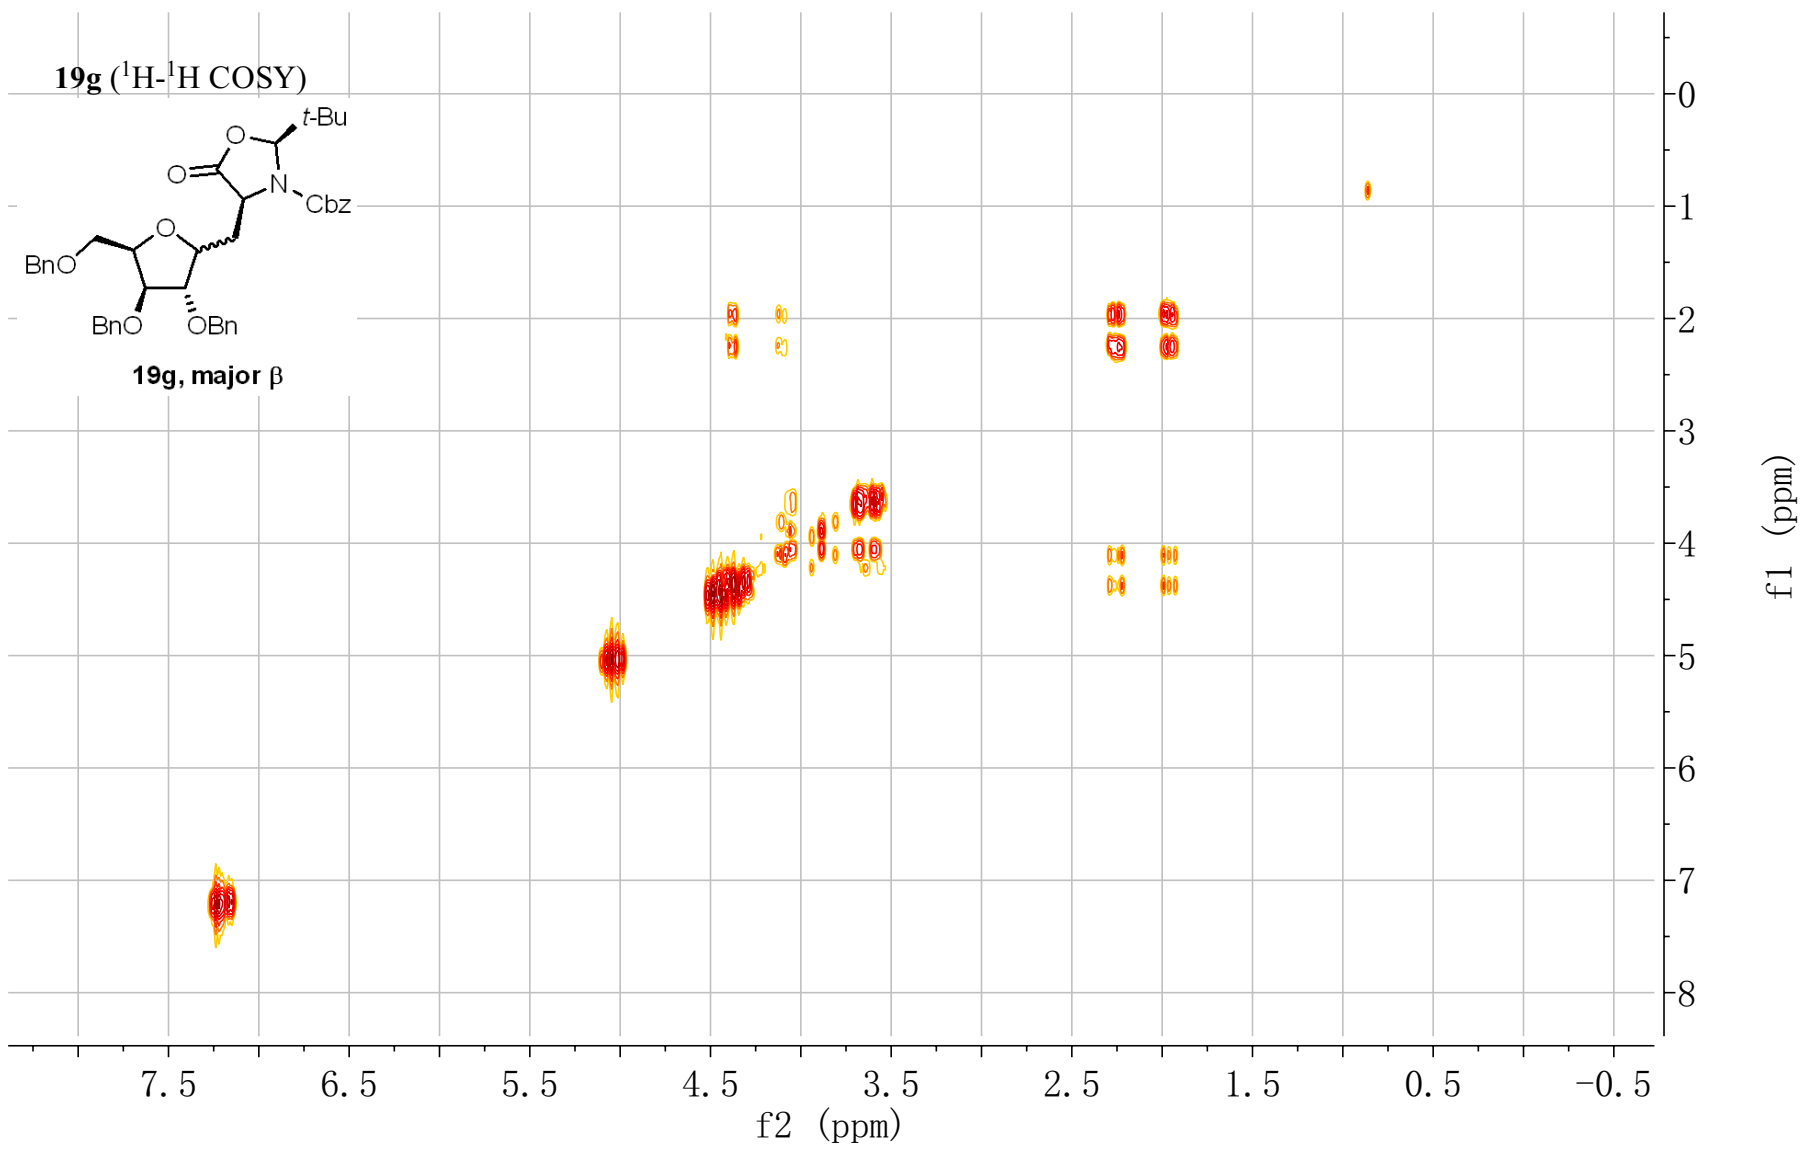

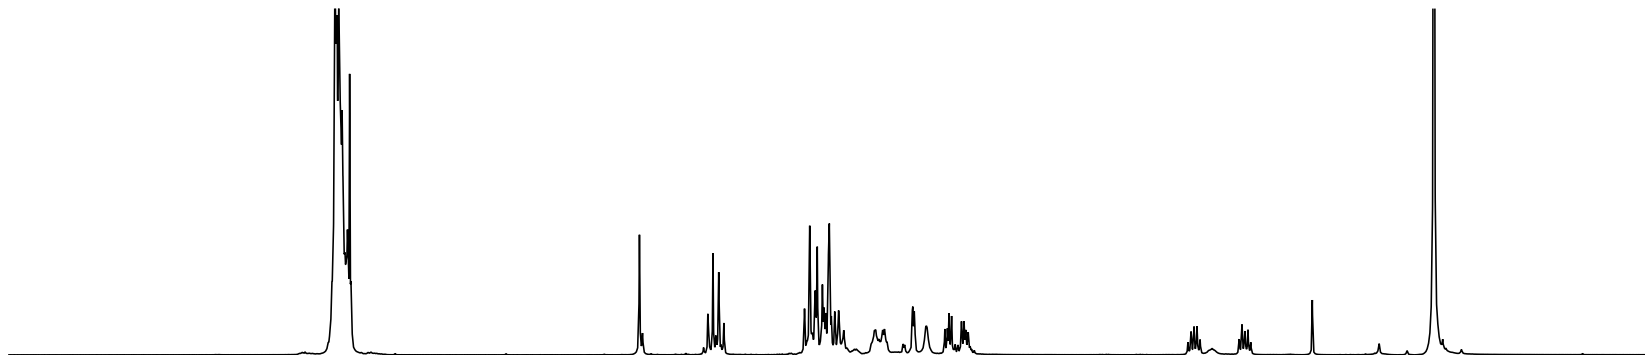

**19g** ( $^1\text{H}$ - $^{13}\text{C}$  Coupled HSQC )

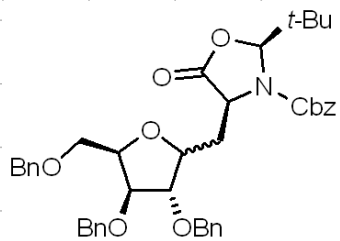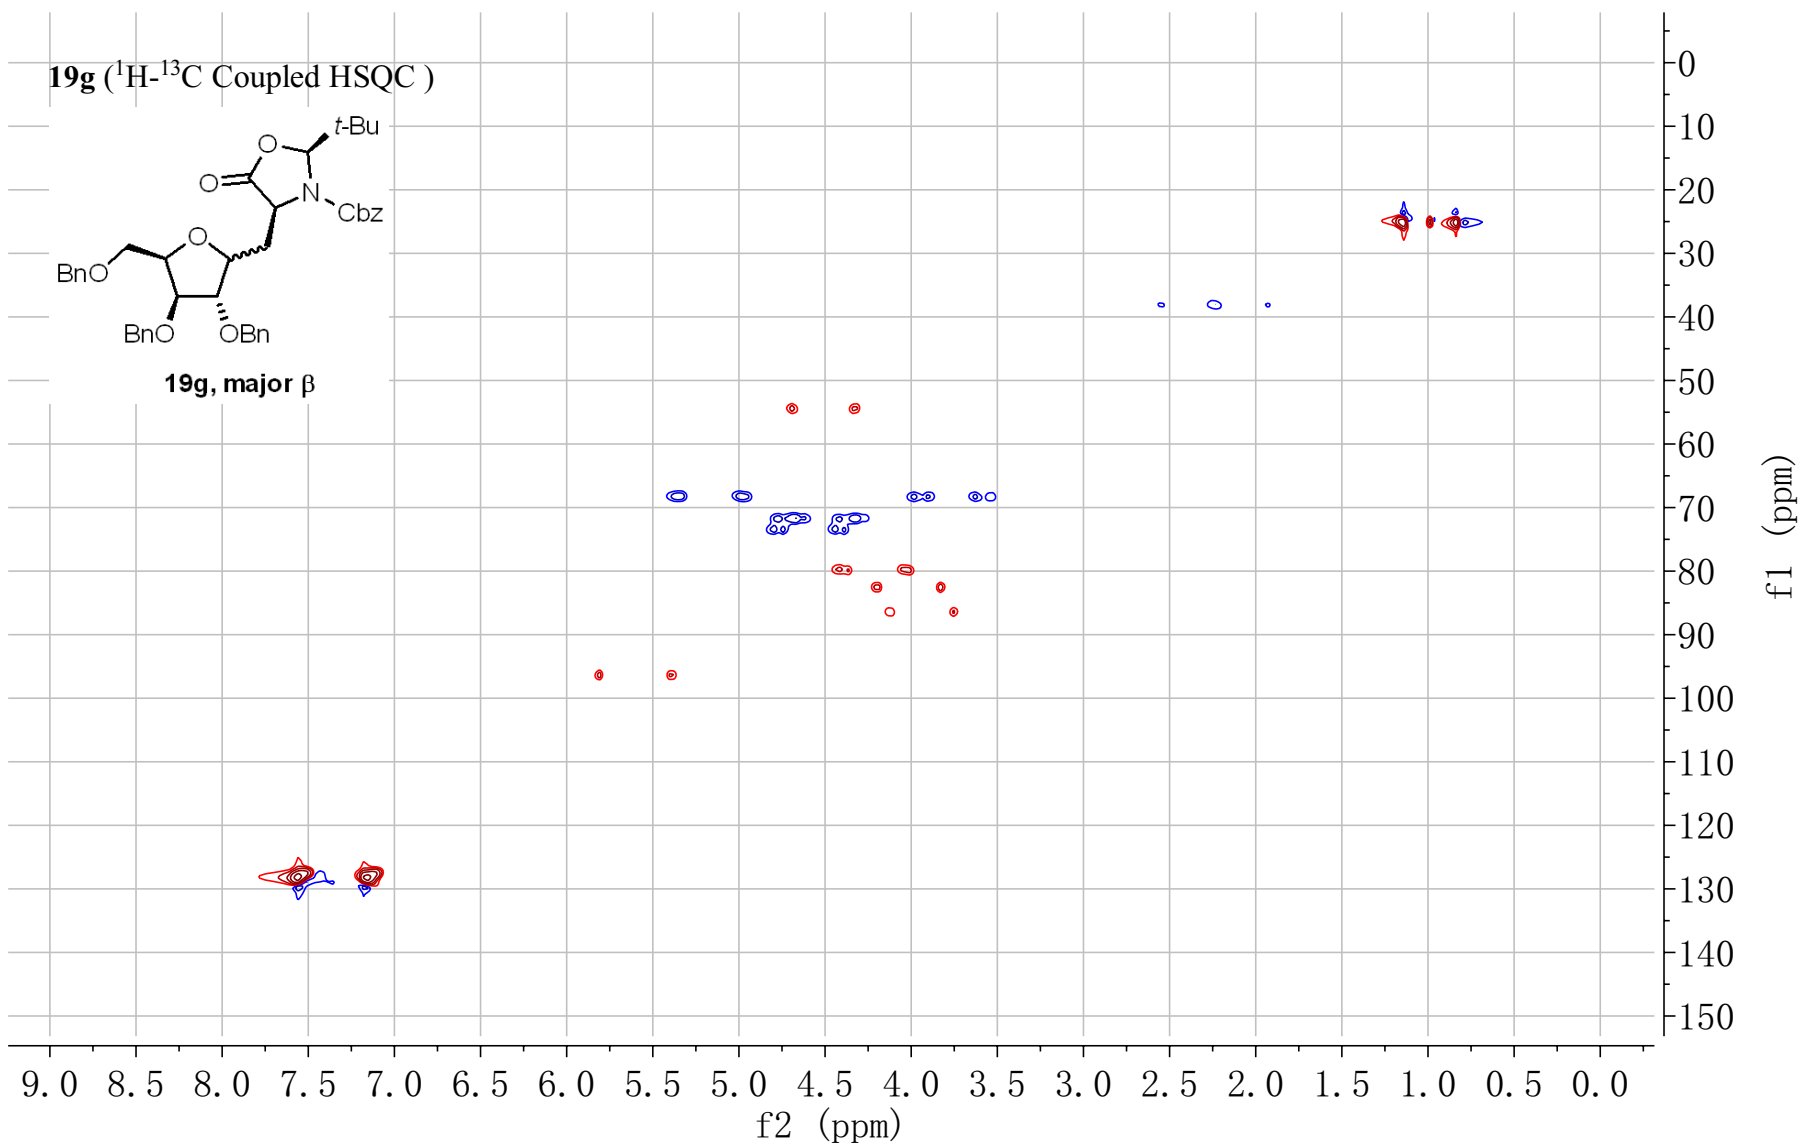

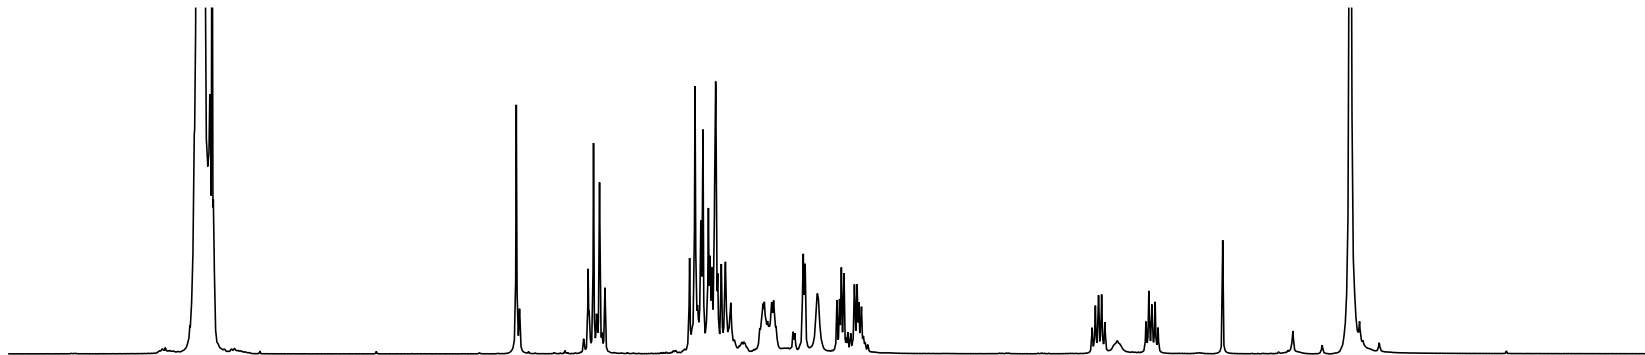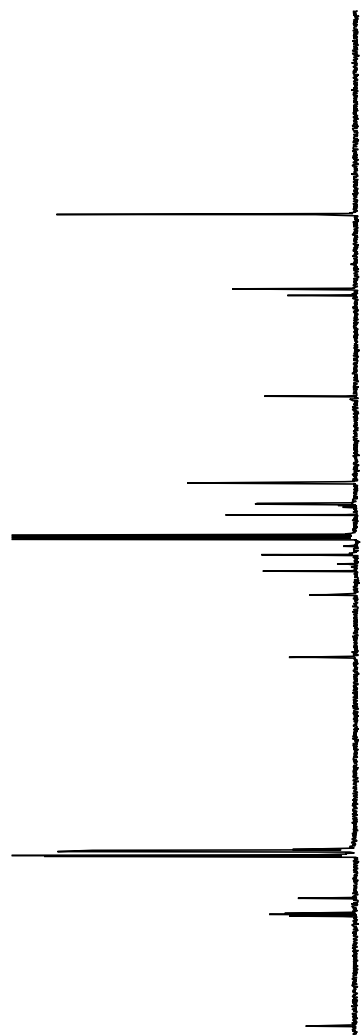

**19g** (<sup>1</sup>H-<sup>13</sup>C HSQC)

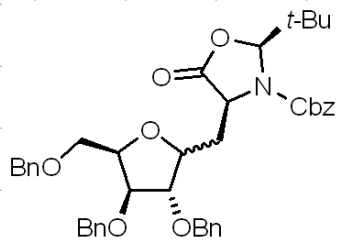

**19g, major β**

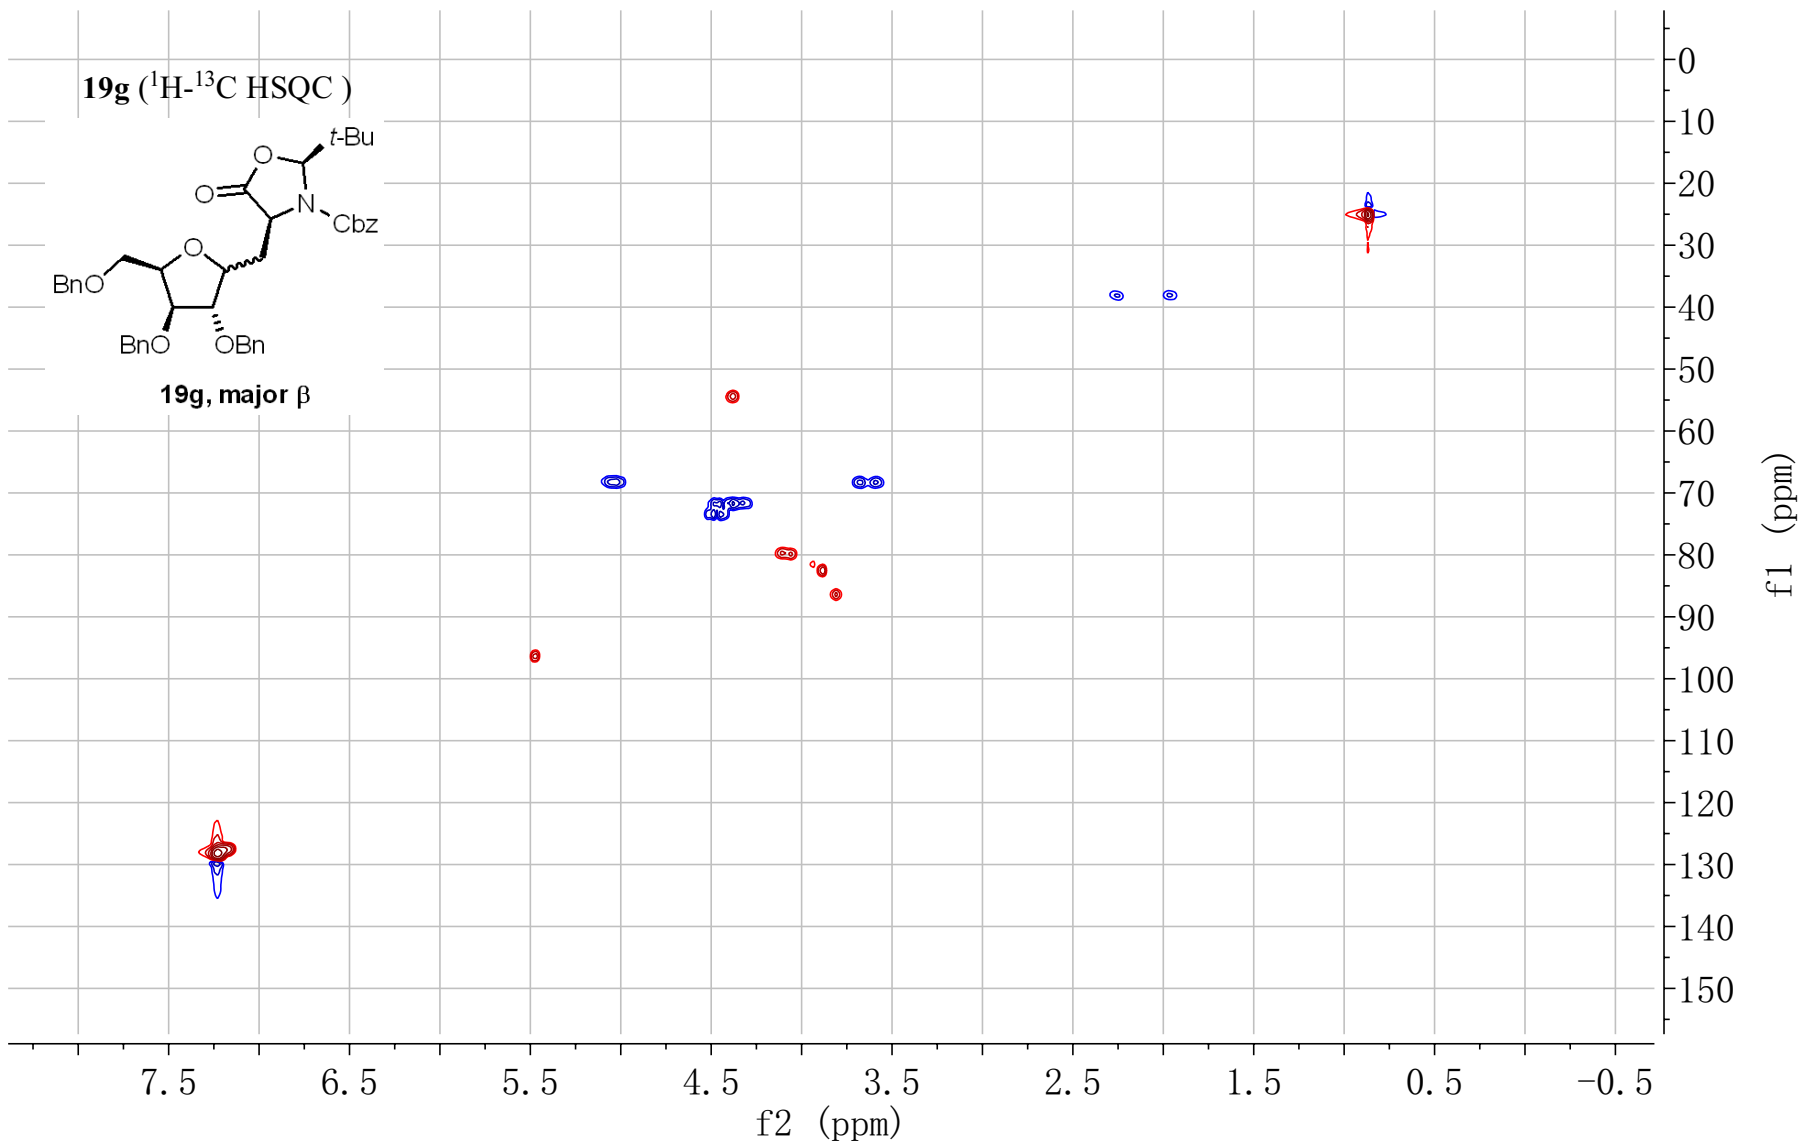

S109



7.40  
7.38  
7.38  
7.38  
7.36  
7.35  
7.32  
7.31  
7.30  
7.28  
7.28  
5.59  
5.24  
5.21  
5.15  
5.12  
4.68  
4.67  
4.65  
4.64  
4.63  
4.62  
4.61  
4.60  
4.60  
4.58  
4.57  
4.54  
4.54  
4.52  
4.49  
4.18  
4.18  
4.16  
4.07  
4.06  
4.06  
4.05  
3.90  
3.89  
3.89  
3.61  
3.59  
3.58  
3.57  
3.55  
3.53  
3.52  
3.51  
2.36  
2.34  
2.33  
2.32  
2.30  
2.07  
2.05  
2.04  
1.00  
0.97

**19h** (<sup>1</sup>H NMR, 400MHz, CDCl<sub>3</sub>)

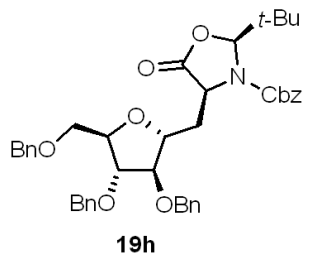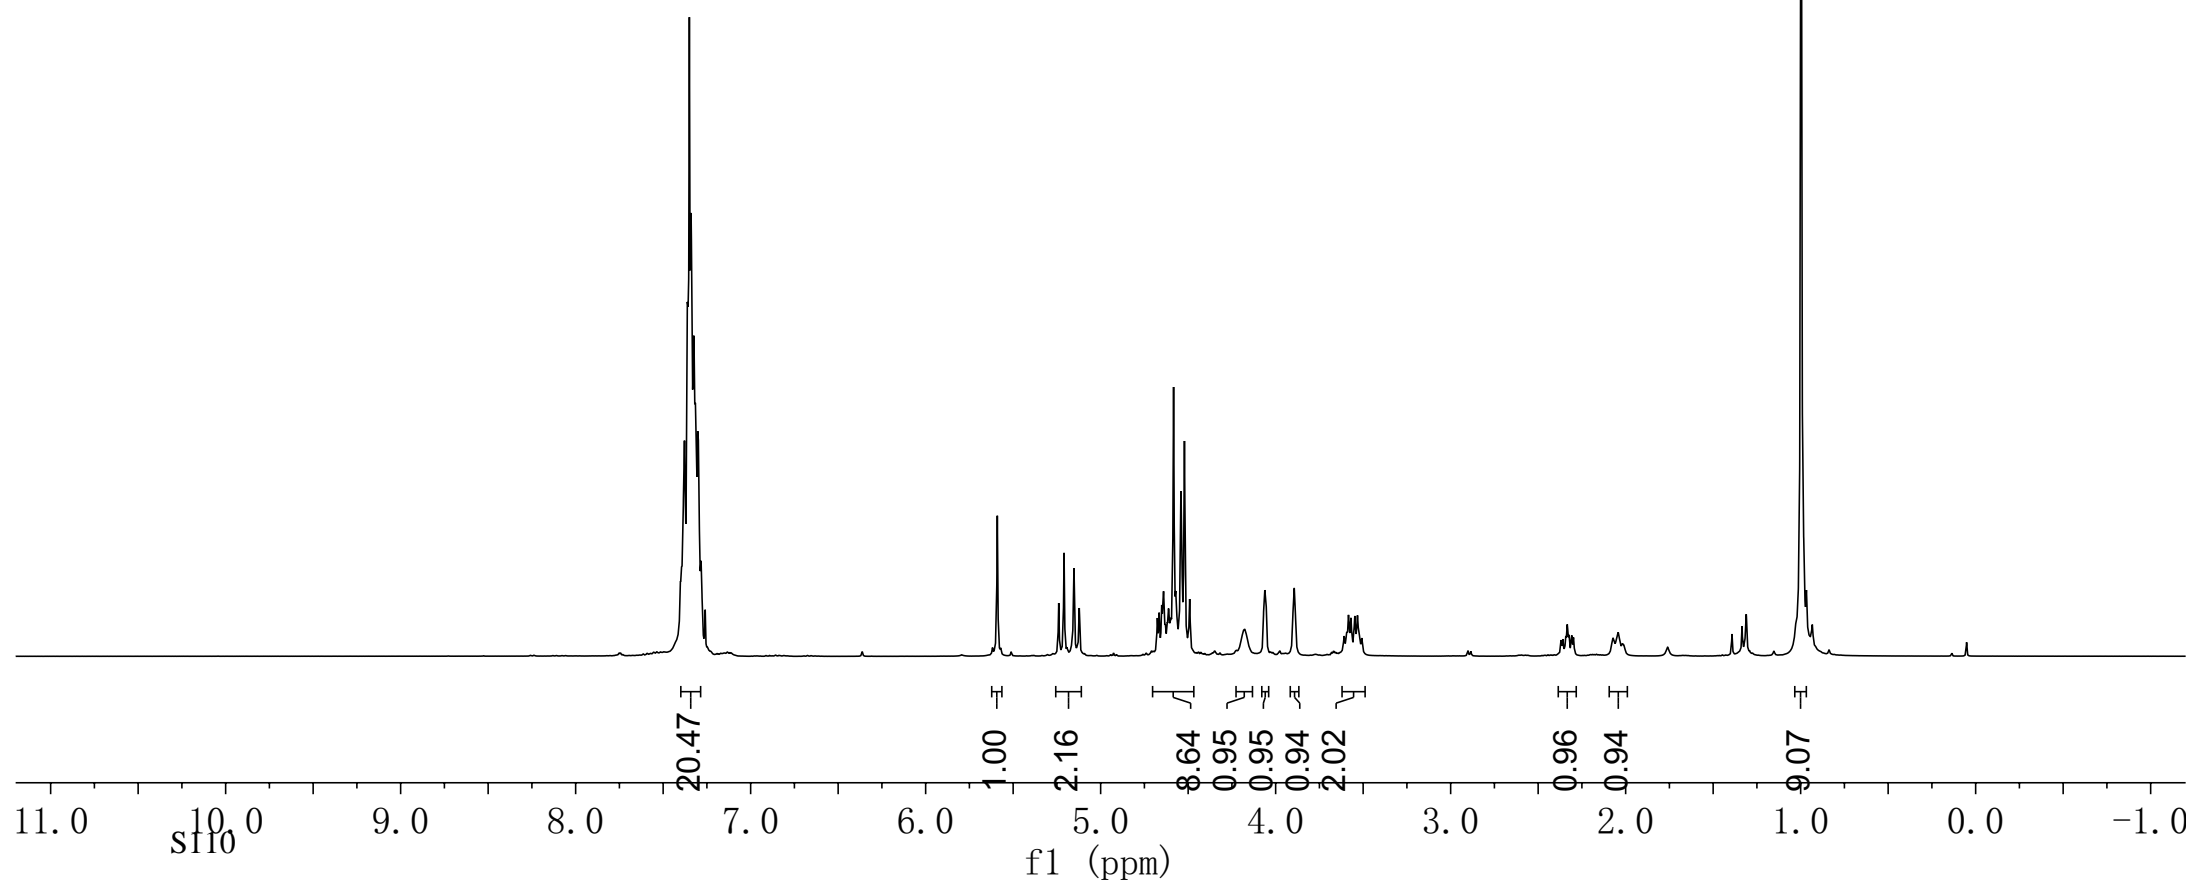

**19h** ( $^{13}\text{C}$  NMR, 101MHz,  $\text{CDCl}_3$ )

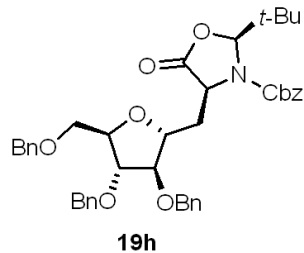

172.58  
155.75  
138.29  
137.95  
137.82  
135.49  
128.75  
128.69  
128.55  
128.50  
128.46  
128.40  
127.81  
127.79  
127.76  
127.65  
96.19  
87.55  
85.22  
81.93  
78.99  
77.16  
73.45  
72.09  
71.77  
71.53  
70.40  
68.18  
53.92  
37.19  
36.38  
24.90  
24.77

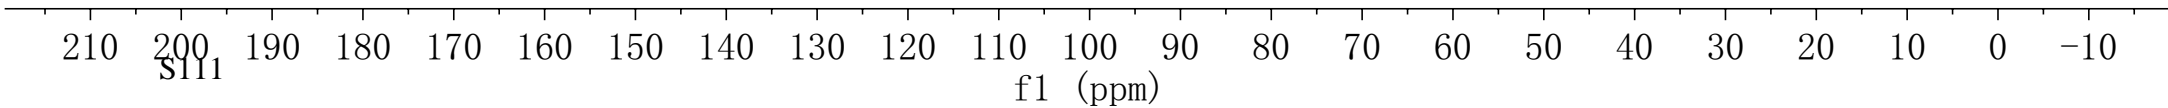

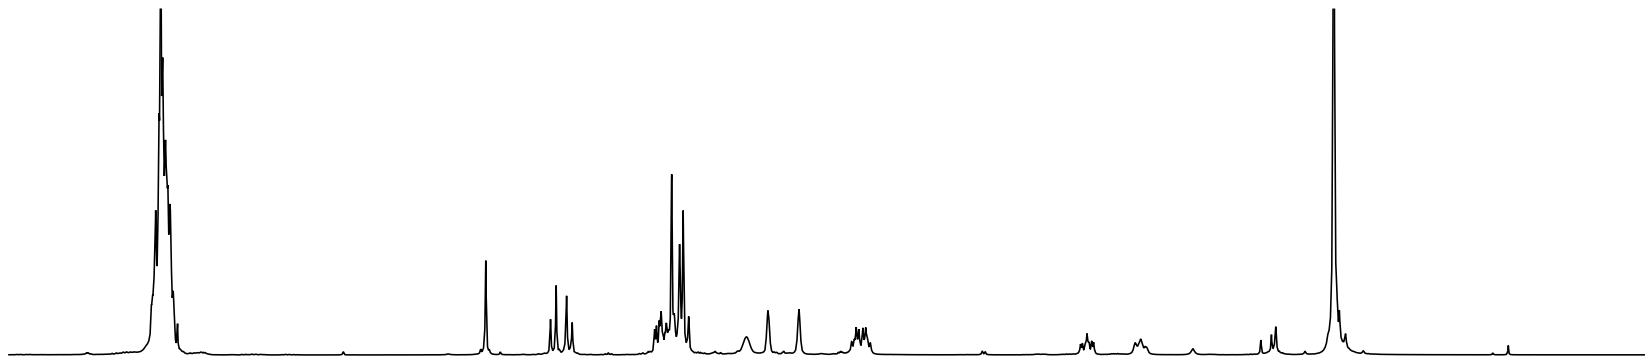

**19h** ( $^1\text{H}$ - $^1\text{H}$  COSY)

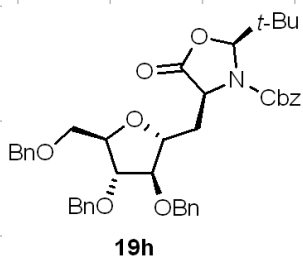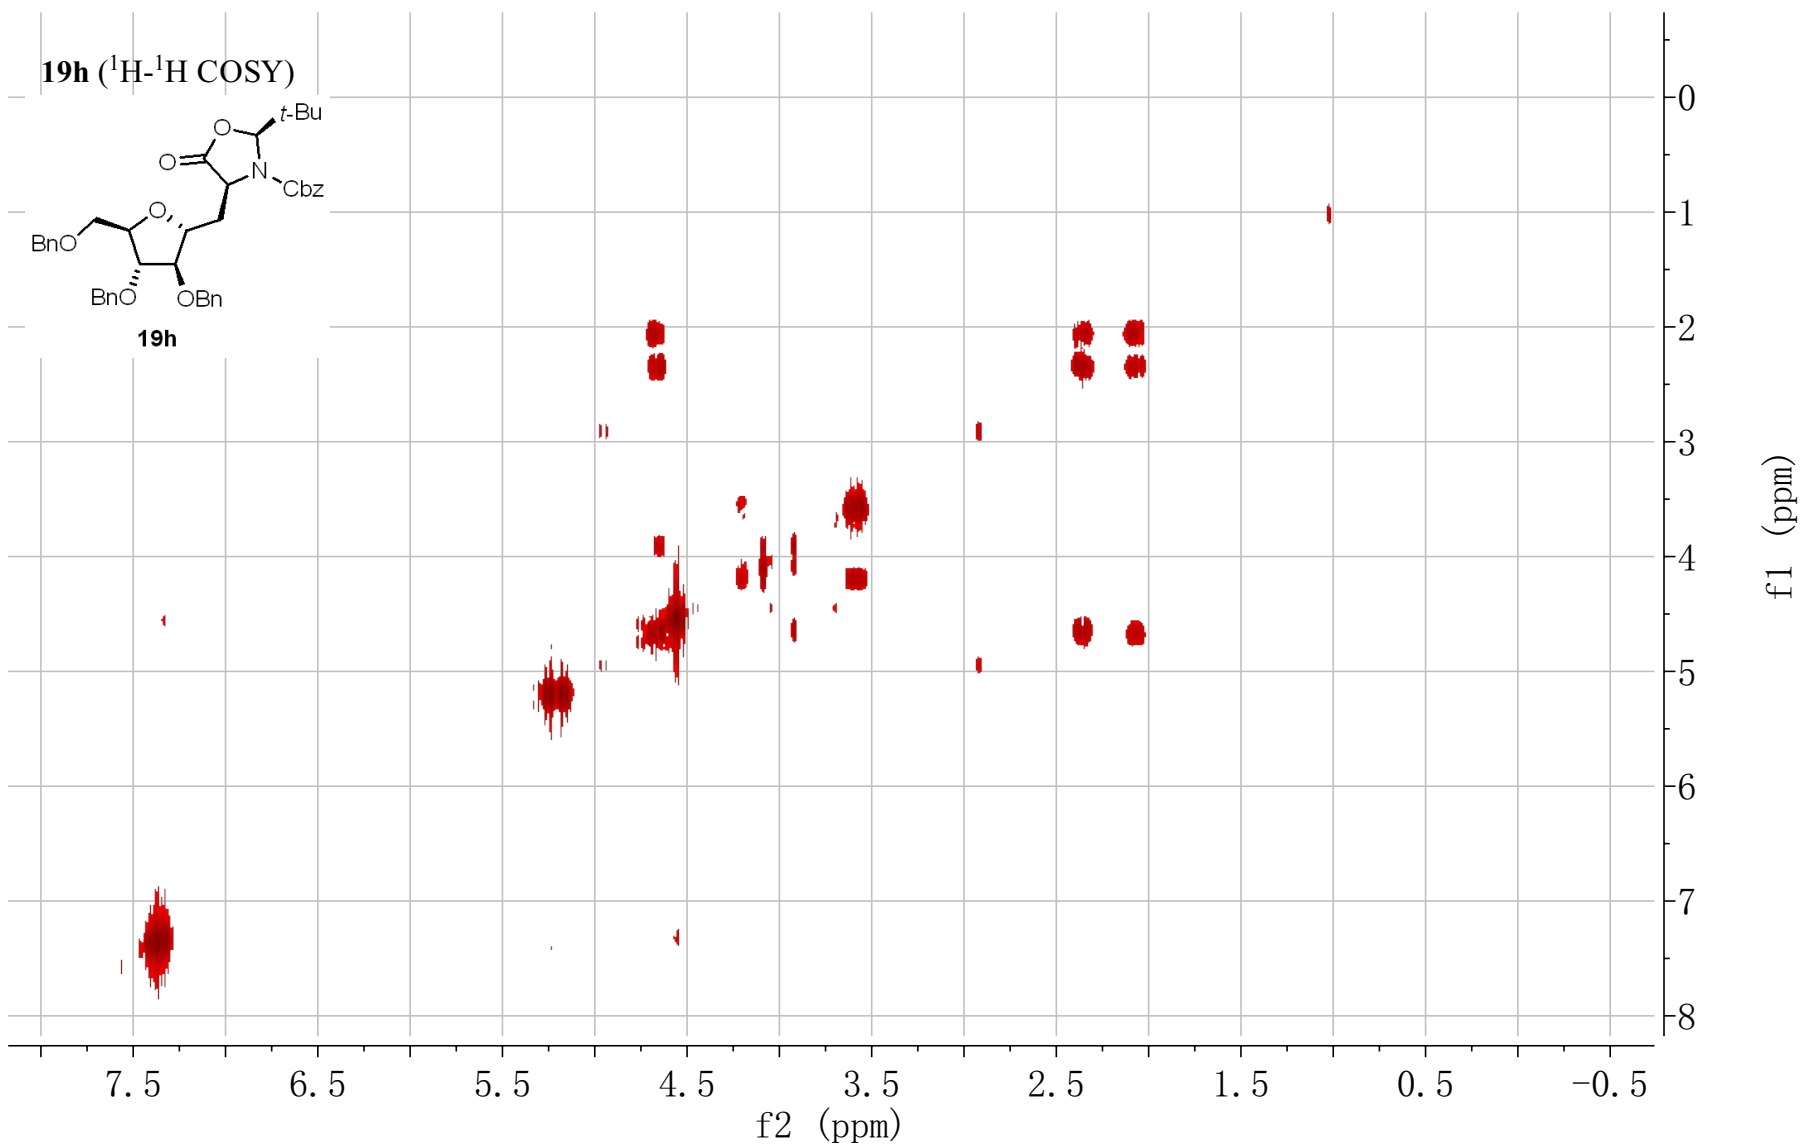

S112

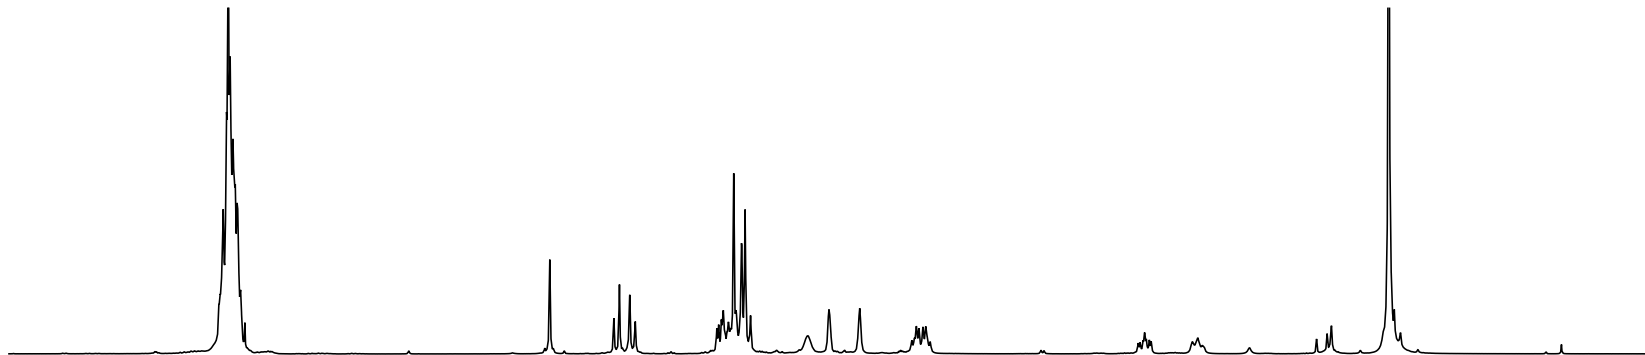

**19h** ( $^1\text{H}$ - $^{13}\text{C}$  Coupled HSQC)

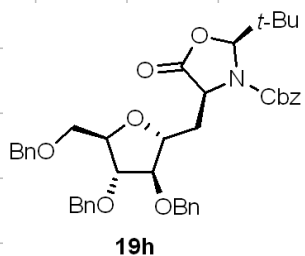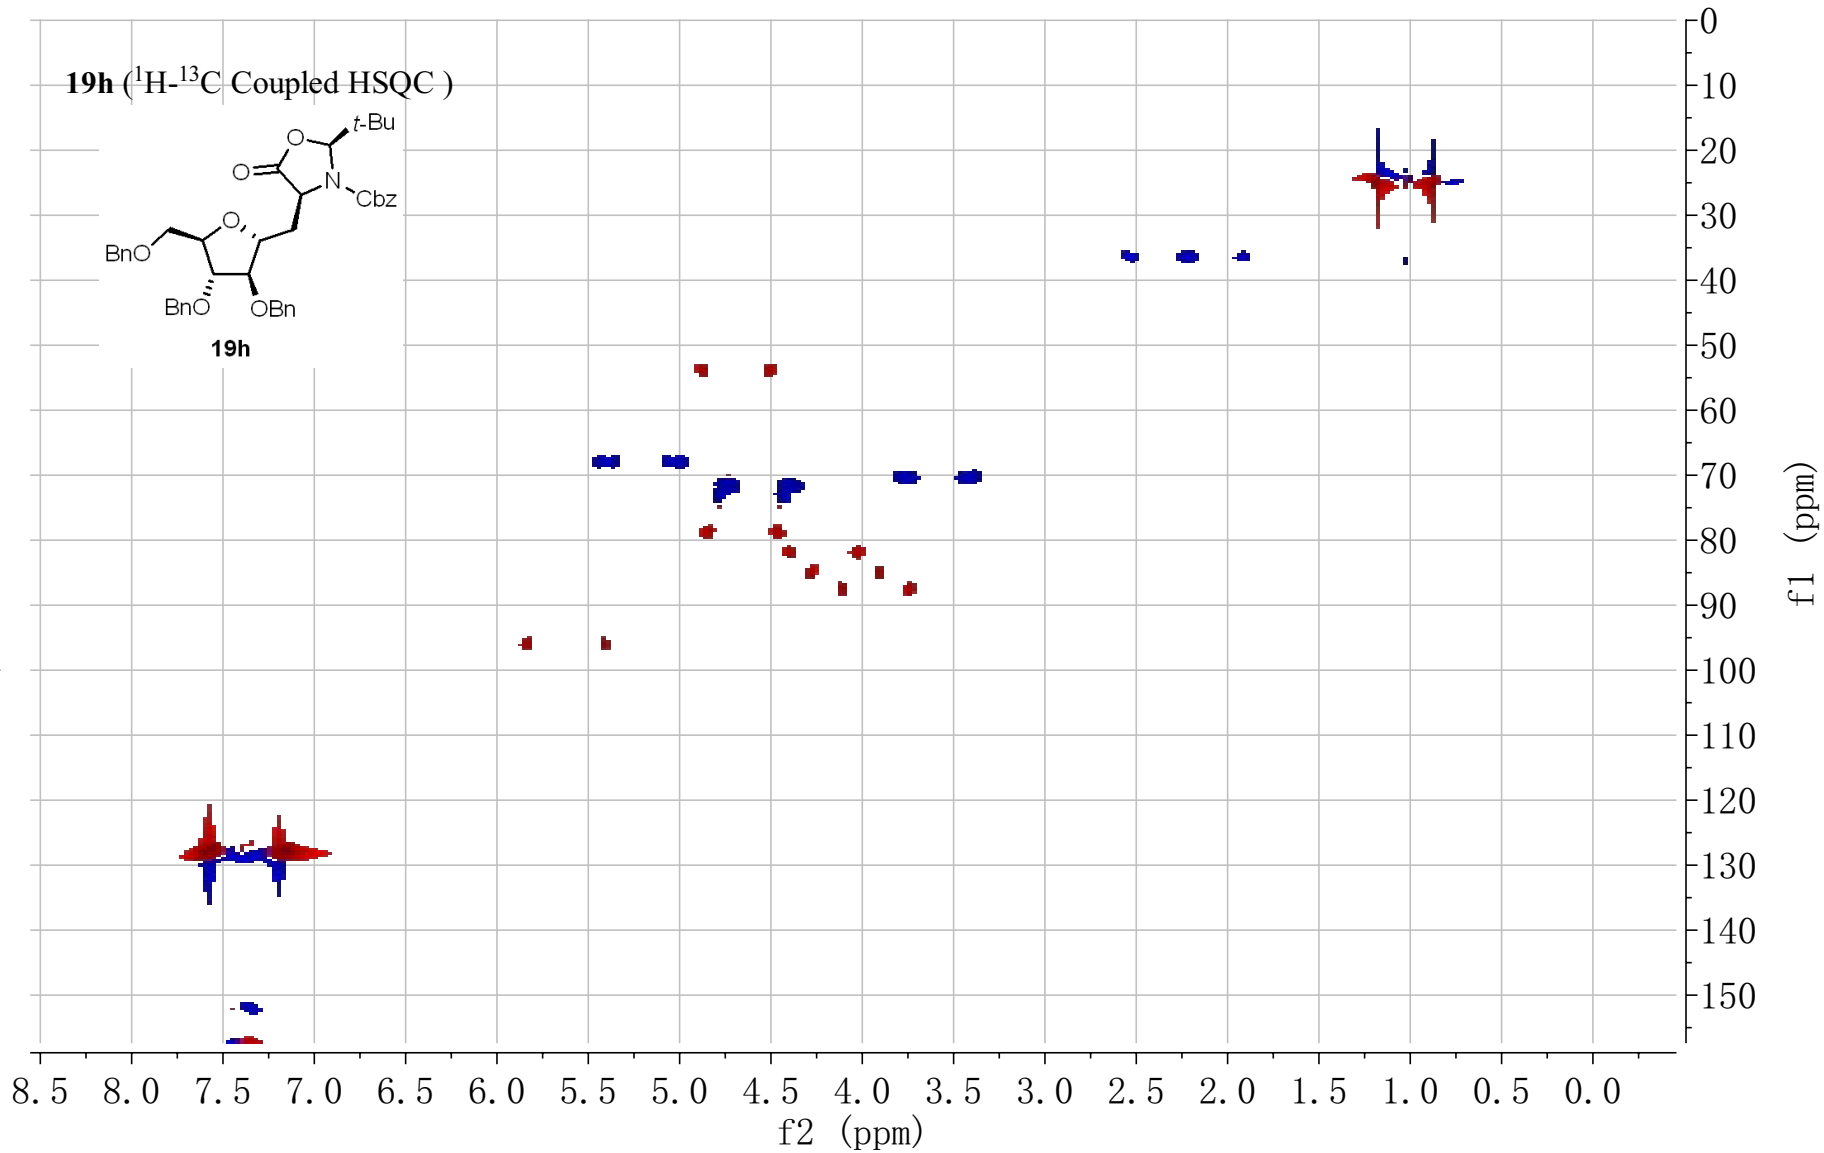

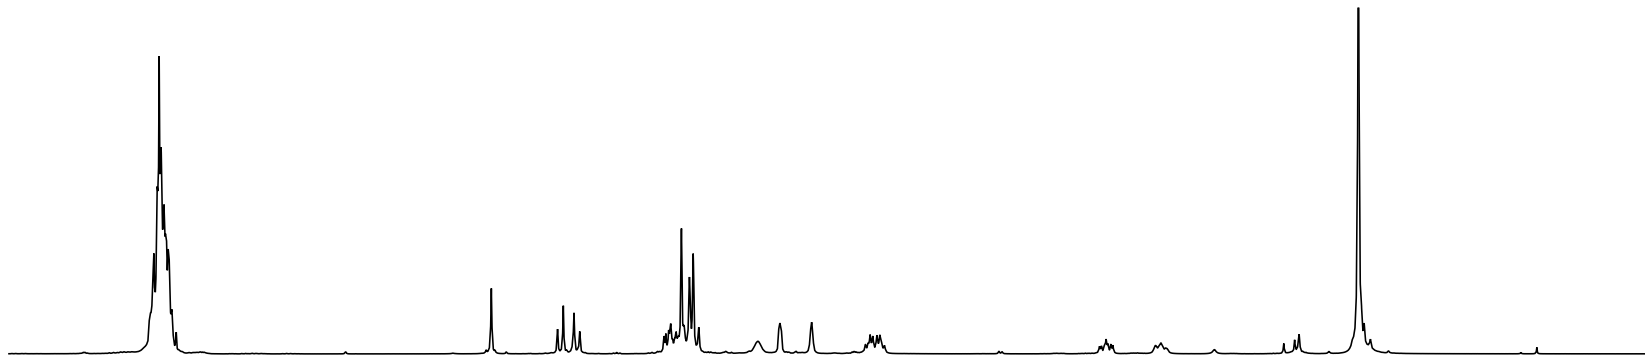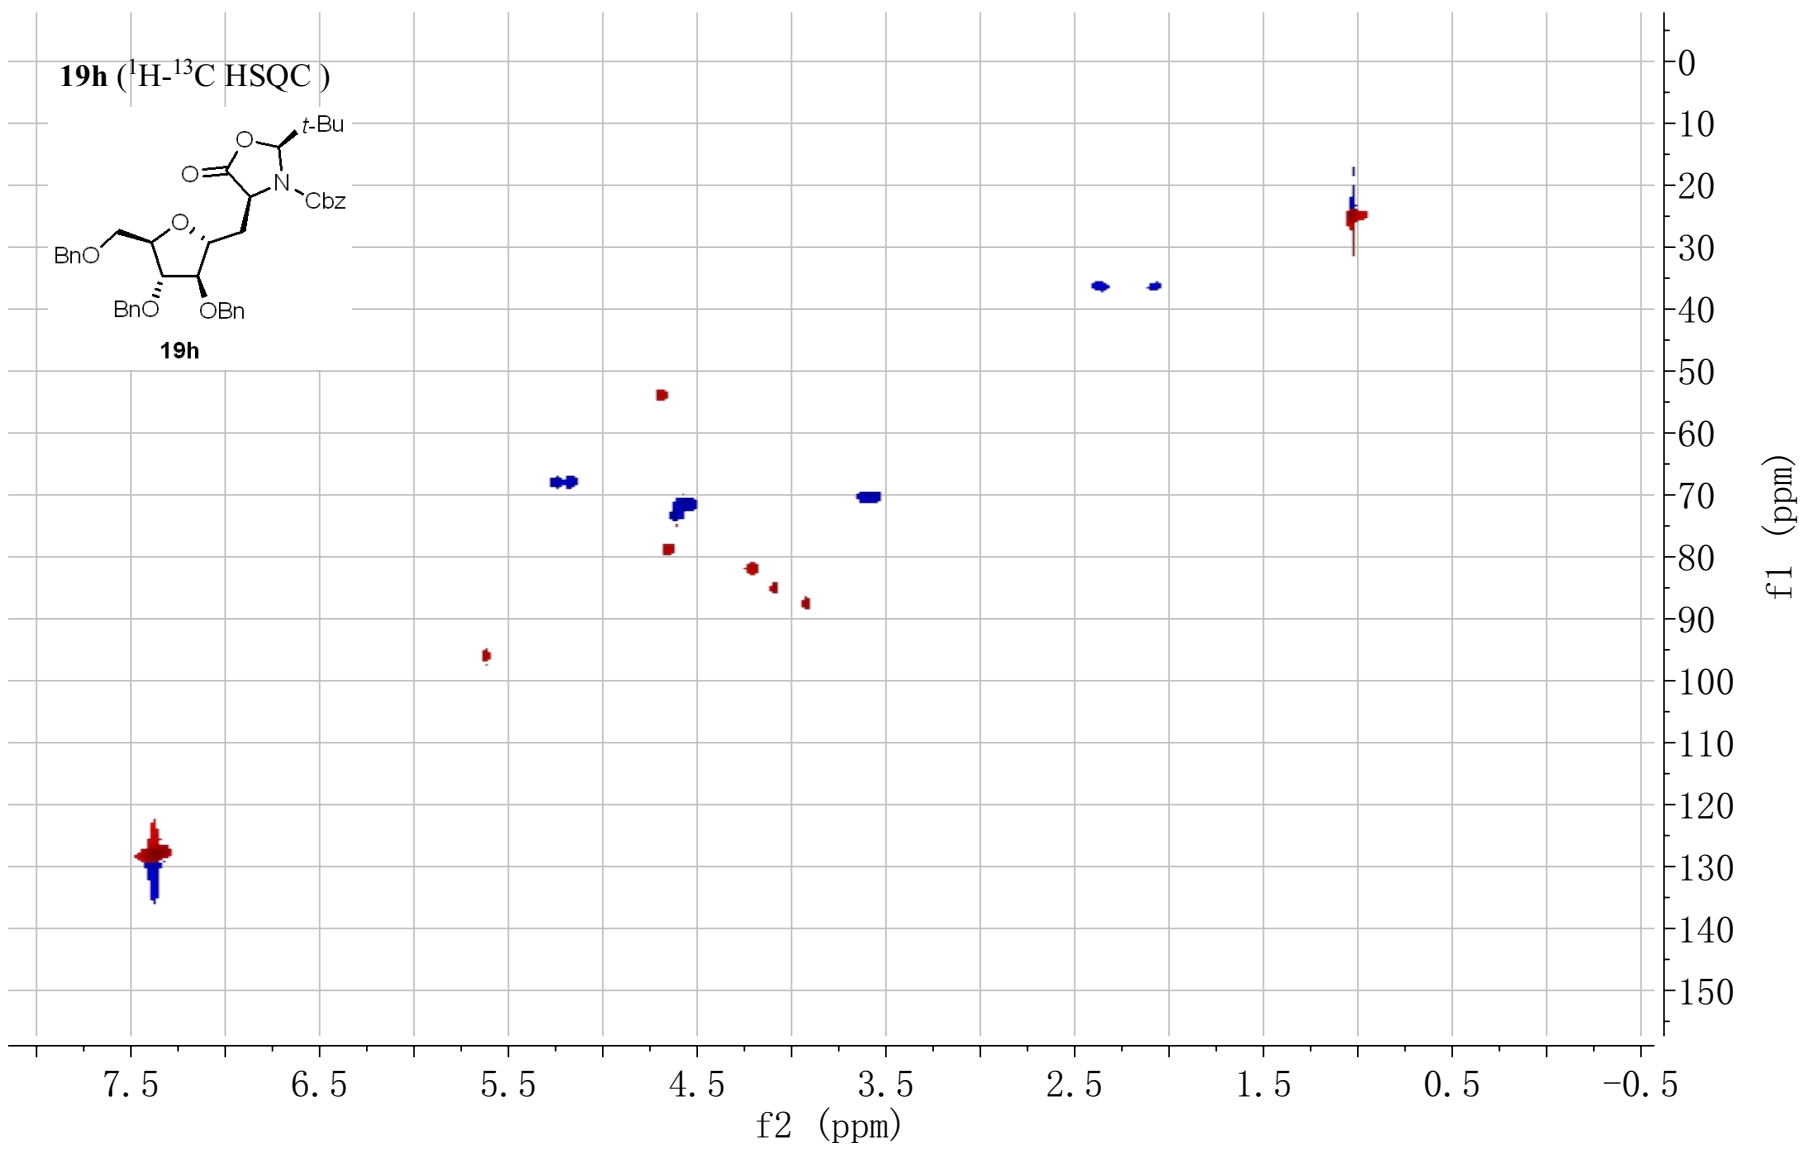

7.35  
7.35  
7.33  
7.32  
7.29  
5.57  
5.21  
5.20  
5.18  
5.17  
5.13  
5.11  
5.10  
5.08  
4.58  
4.56  
4.55  
4.54  
4.53  
4.47  
4.46  
4.44  
4.09  
4.03  
4.01  
3.99  
3.98  
3.49  
3.48  
3.48  
3.47  
3.46  
3.45  
3.44  
3.42  
3.40  
3.39  
3.39  
3.38  
3.37  
2.37  
2.36  
2.35  
2.32  
2.30  
2.28  
2.26  
2.25  
2.07  
2.06  
2.04  
1.96  
1.94  
1.93  
1.79  
1.78  
1.75  
0.97  
0.96

**19i** ( $^1\text{H}$  NMR, 400MHz,  $\text{CDCl}_3$ )

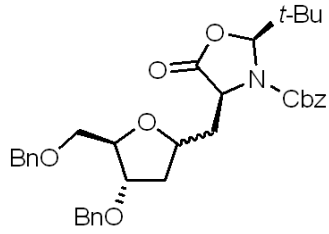

**19i, major  $\alpha$**

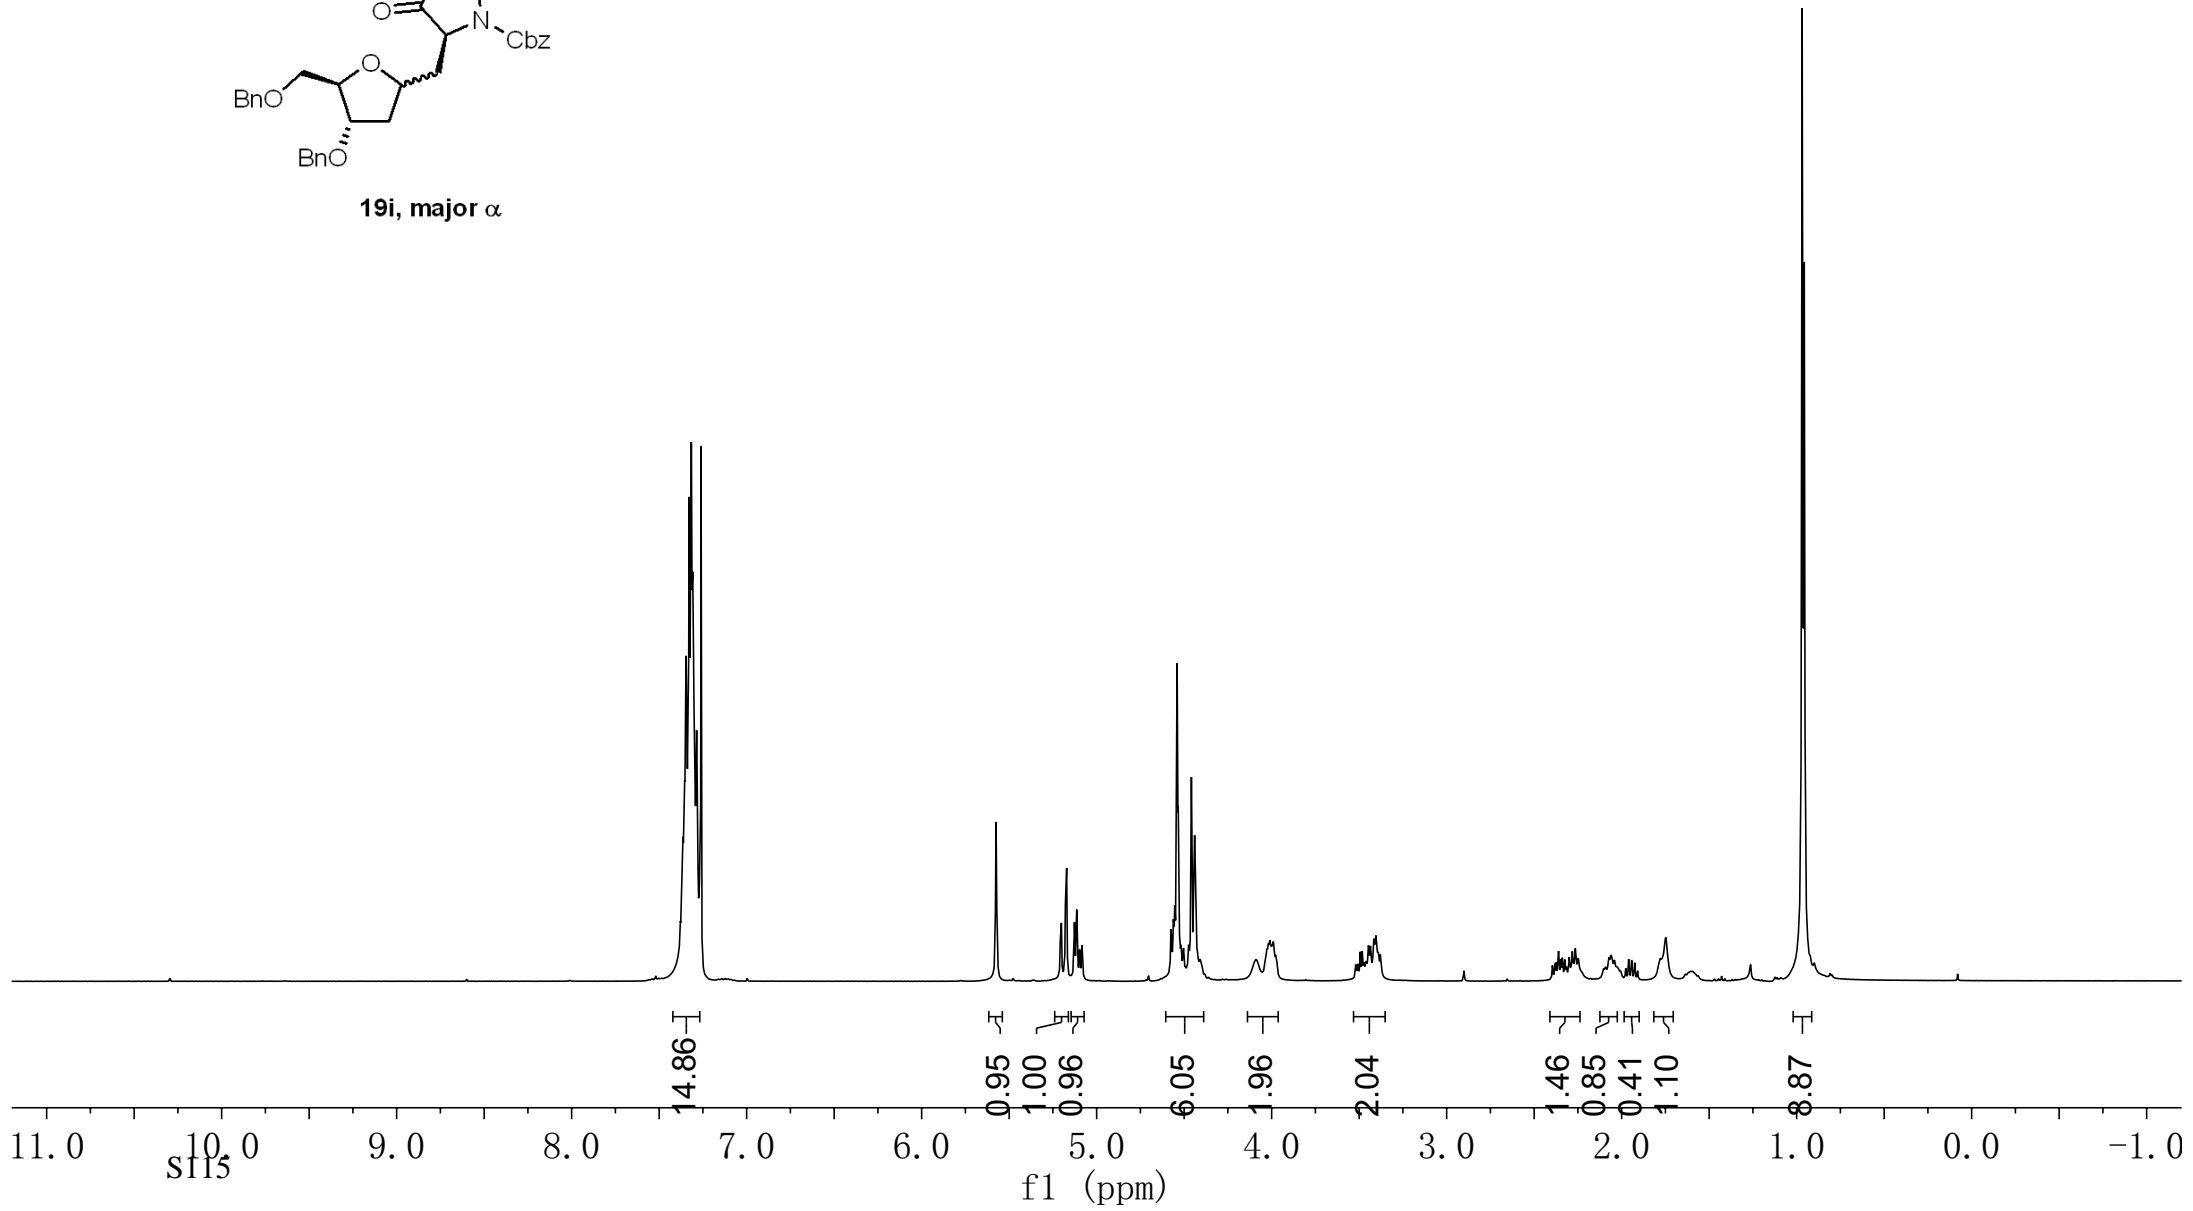

172.79  
172.63  
156.15  
155.99  
138.32  
138.29  
138.26  
135.43  
135.27  
128.82  
128.77  
128.73  
128.62  
128.54  
128.48  
127.76  
127.72  
127.68  
96.67  
96.42  
83.43  
82.46  
81.28  
80.89  
77.16  
75.35  
75.21  
73.56  
73.53  
71.48  
71.12  
71.08  
70.82  
68.59  
68.36  
55.01  
54.54  
39.55  
39.49  
38.16  
37.66  
37.17  
37.06  
25.04  
25.00

**19i** ( $^{13}\text{C}$  NMR, 101MHz,  $\text{CDCl}_3$ )

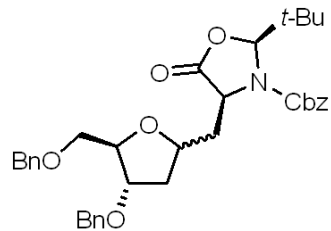

**19i**, major  $\alpha$

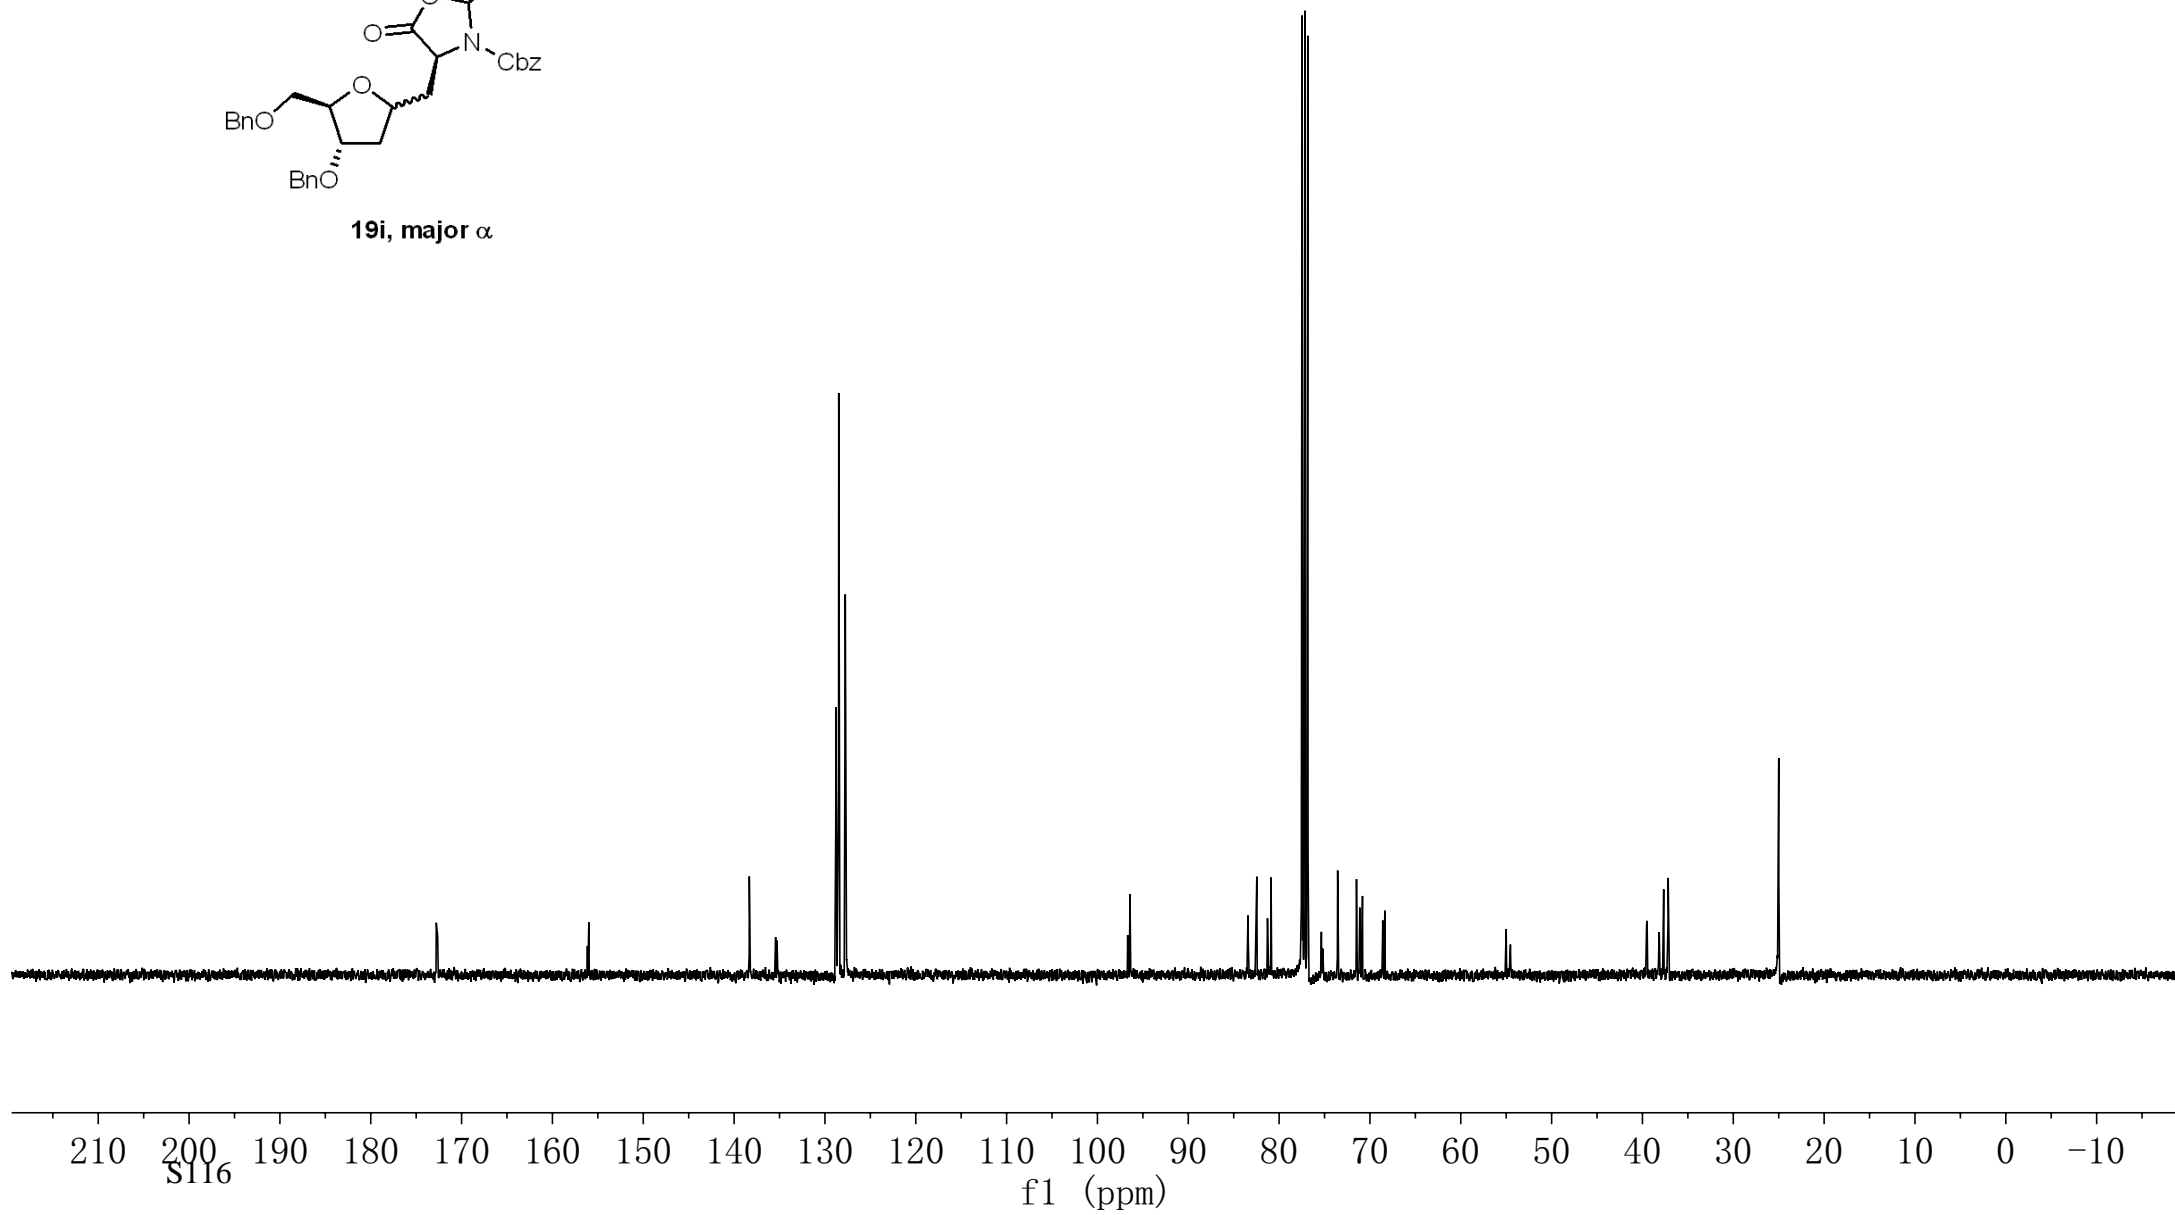

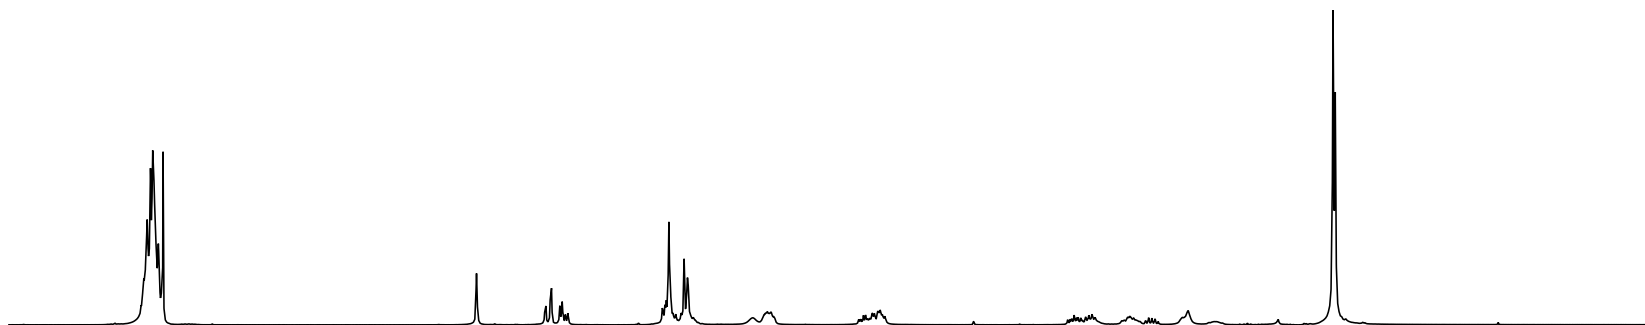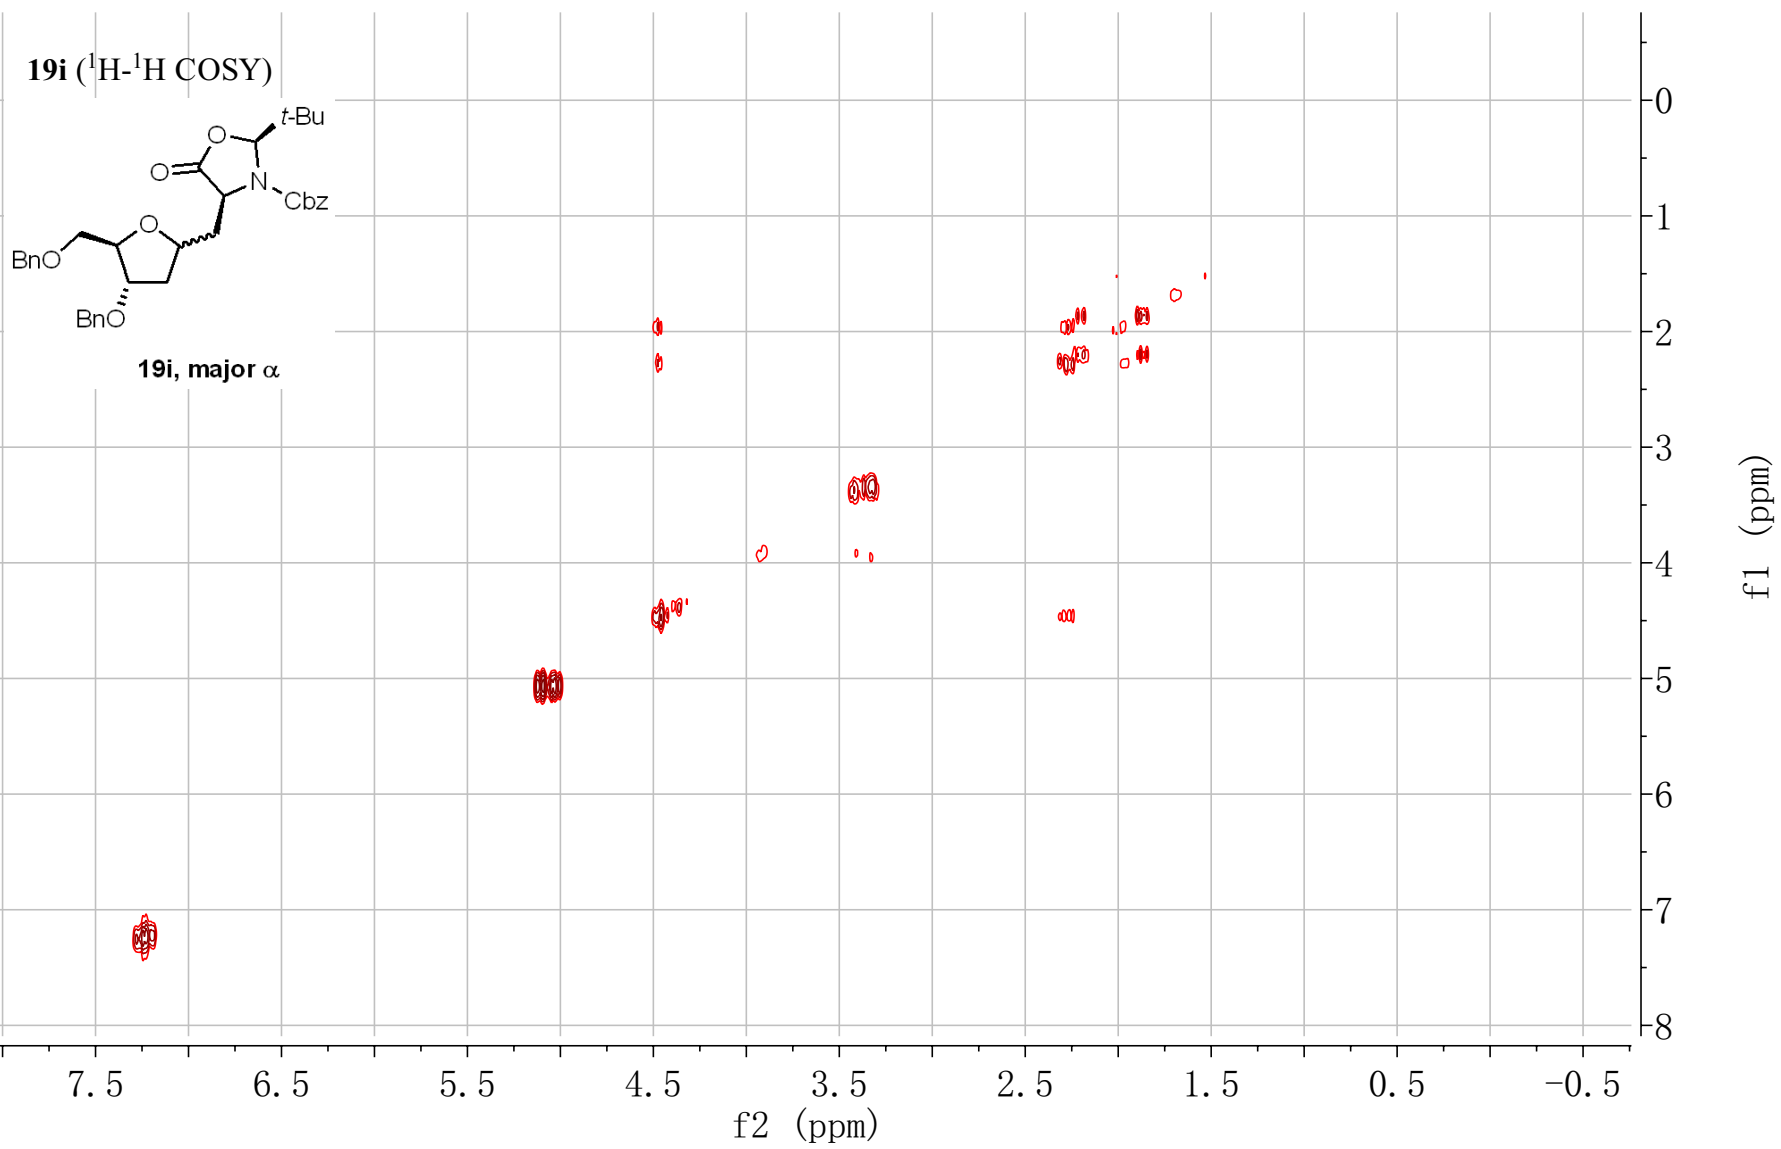



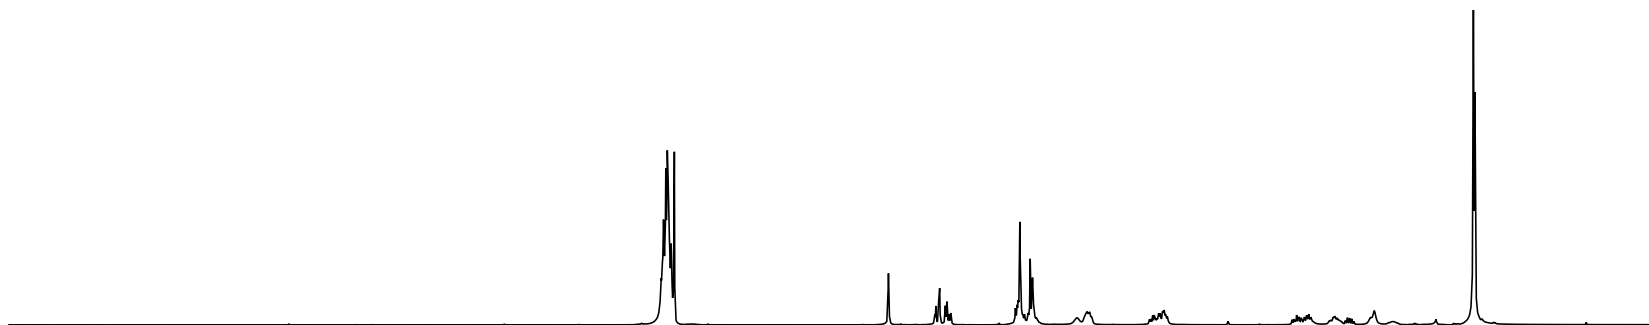

**19i** ( $^1\text{H}$ - $^{13}\text{C}$  Coupled HSQC)

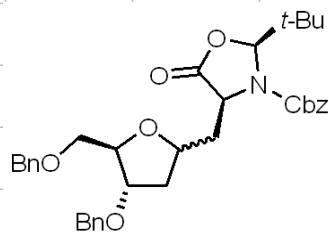

**19i**, major  $\alpha$

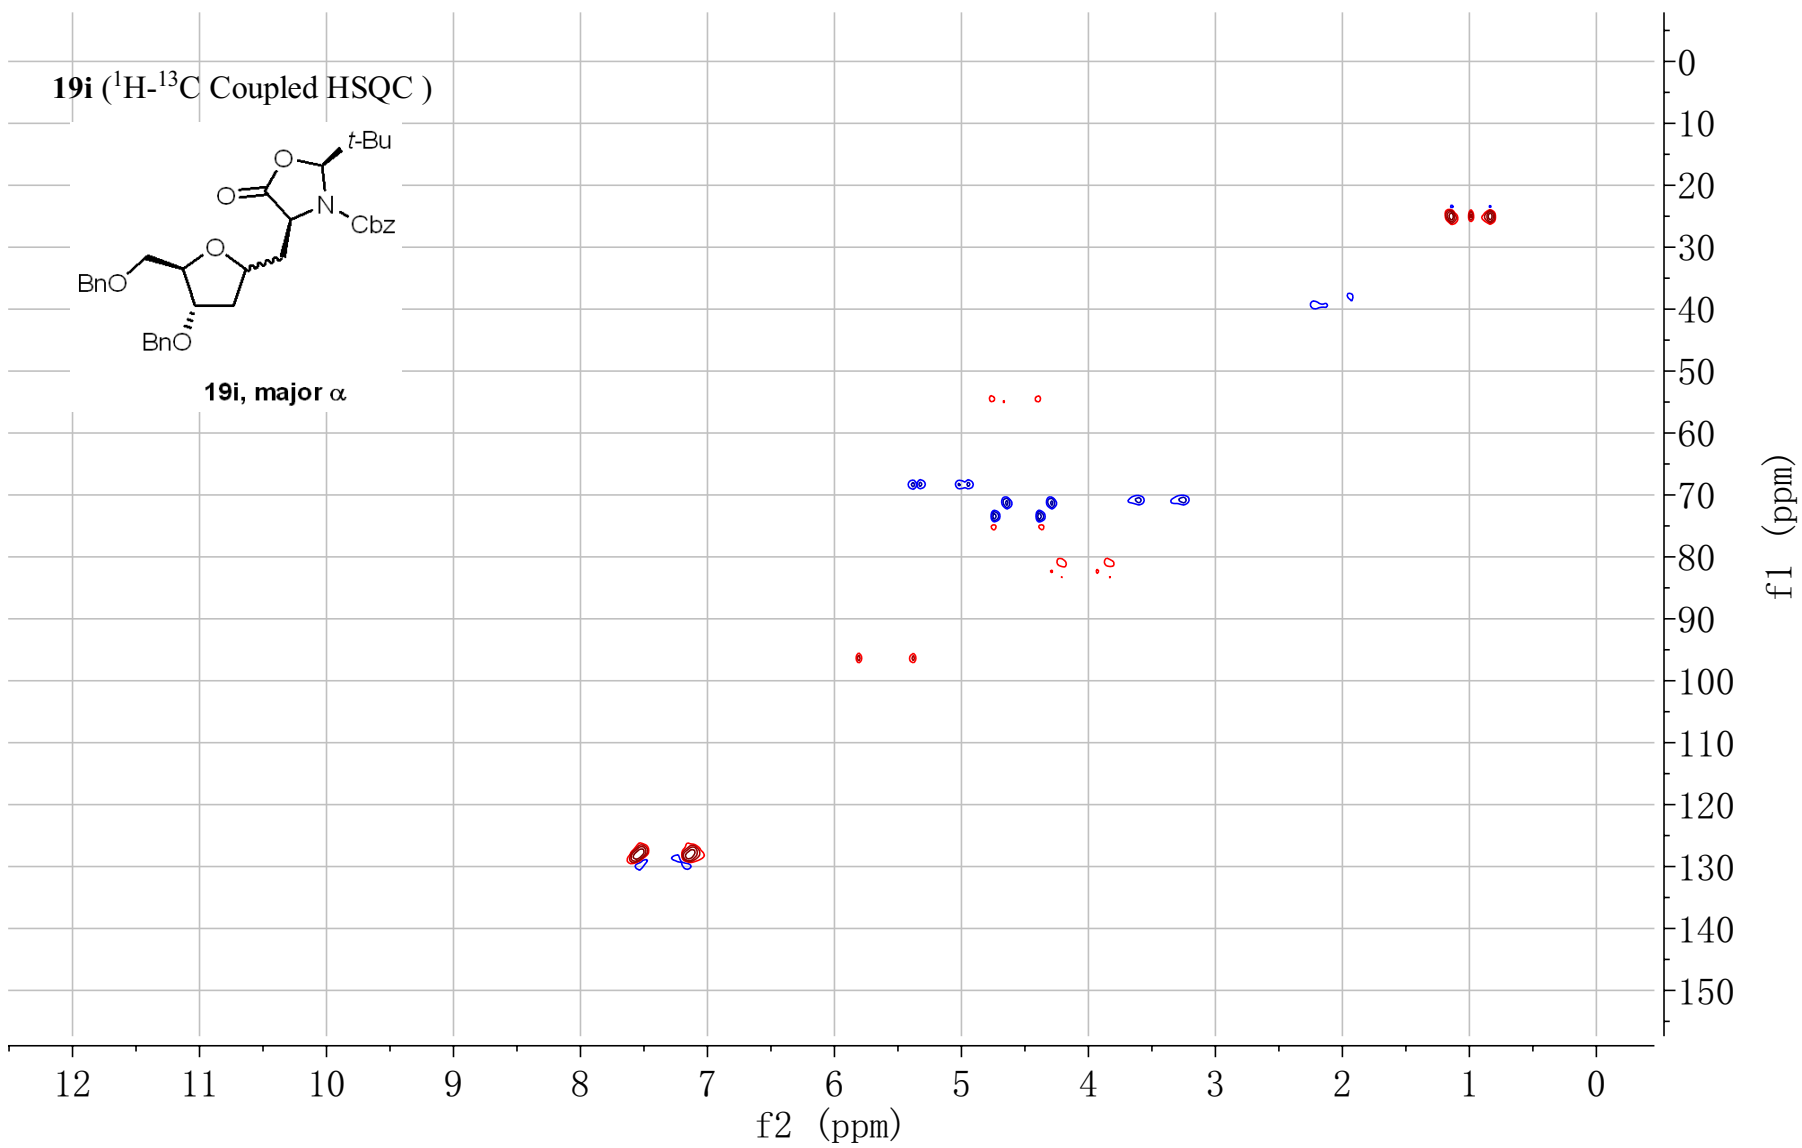

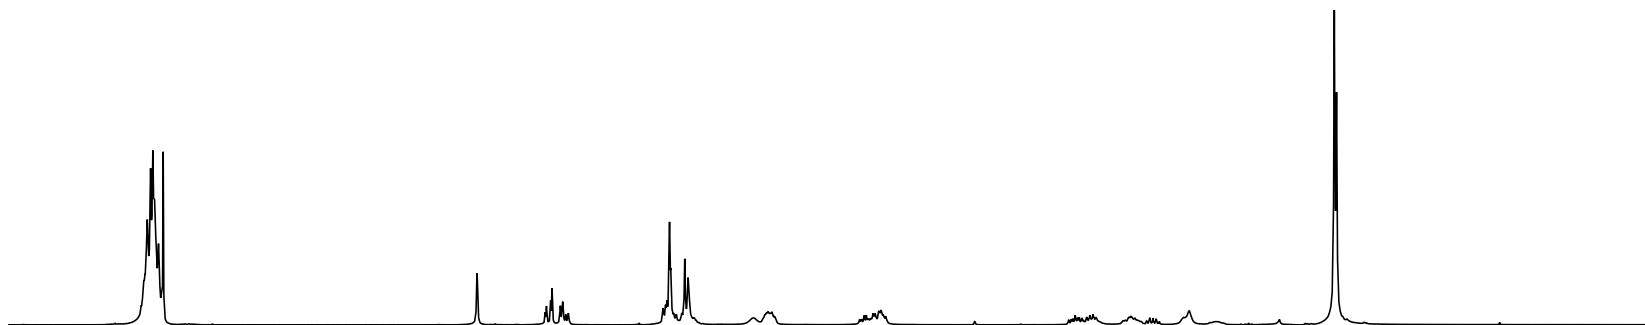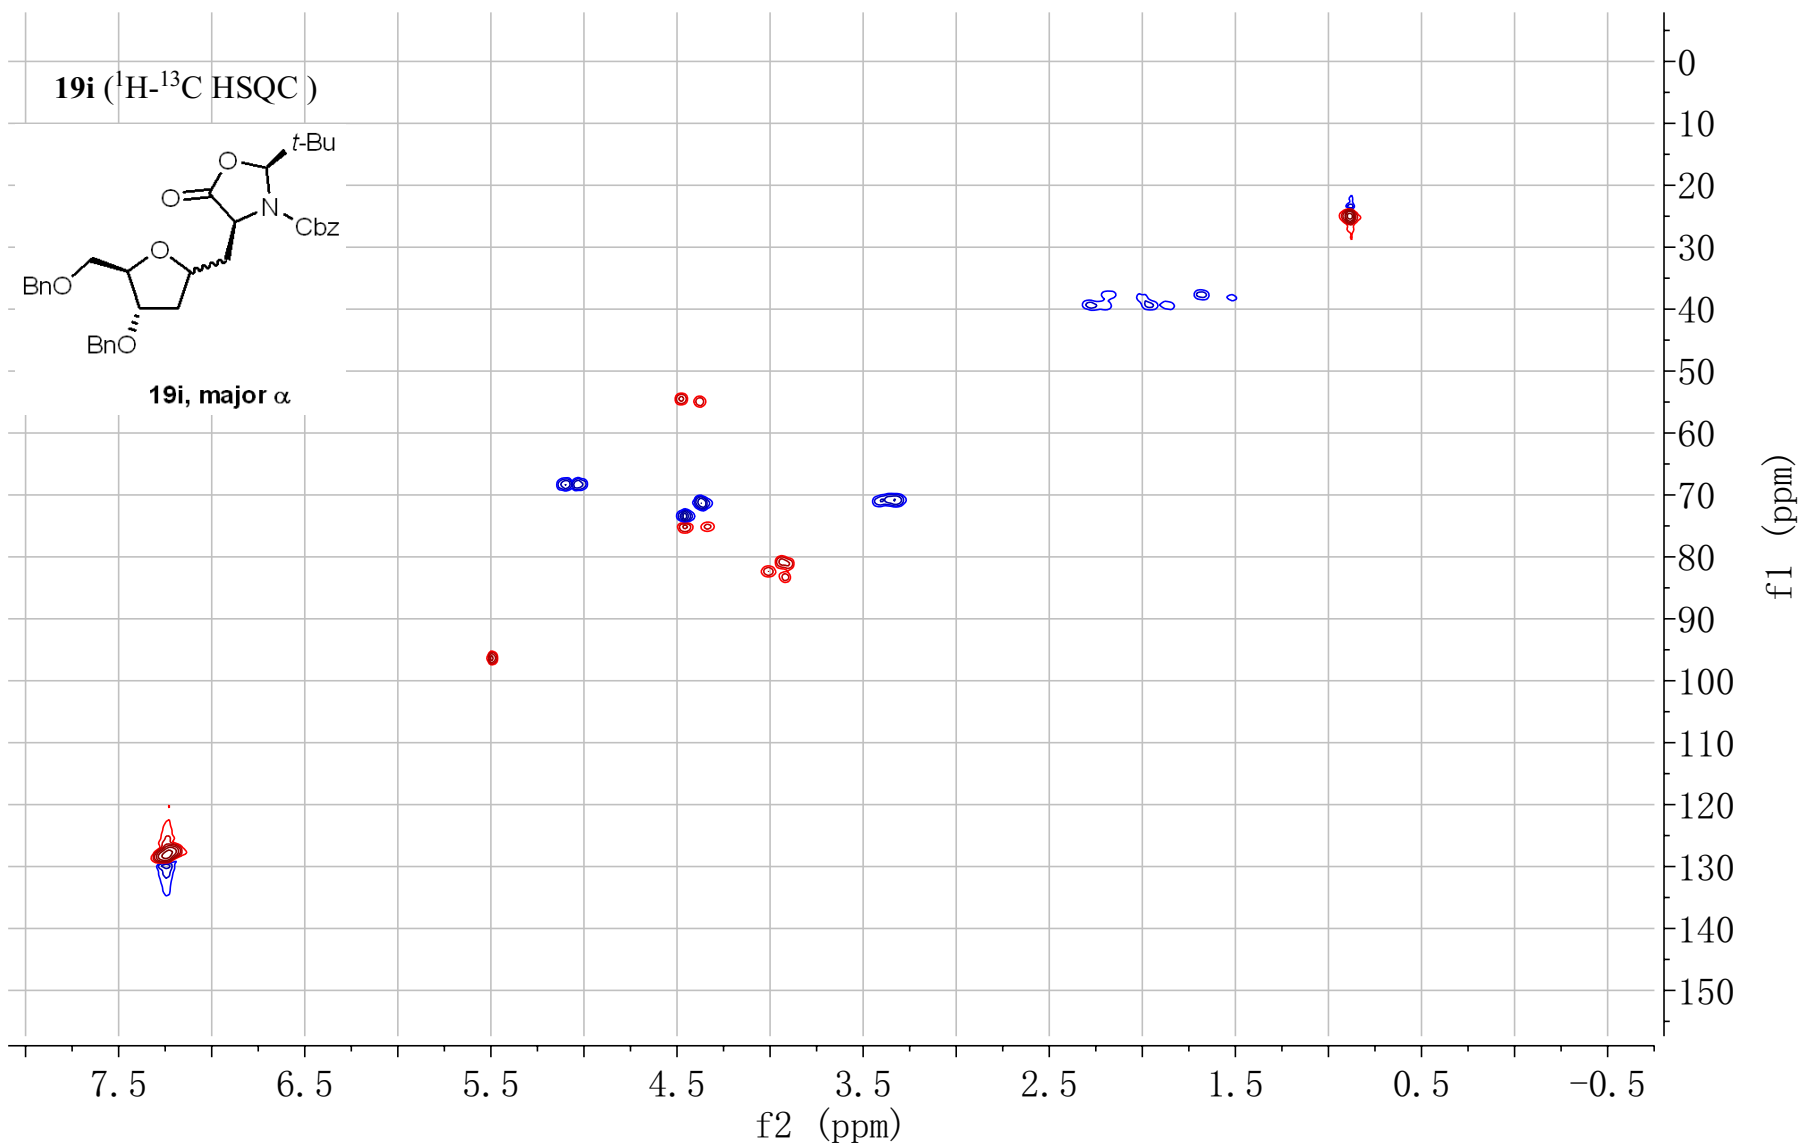

7.41  
7.41  
7.40  
7.39  
7.38  
7.38  
7.36  
7.35  
7.35  
5.55  
5.21  
5.20  
4.63  
4.62  
4.61  
4.60  
4.49  
4.48  
4.48  
4.47  
4.46  
4.45  
4.45  
4.44  
4.17  
4.15  
4.15  
4.13  
4.03  
4.02  
4.02  
4.00  
3.99  
3.97  
3.96  
3.94  
3.82  
3.80  
3.79  
3.71  
3.69  
3.66  
3.46  
3.44  
2.19  
2.18  
2.18  
2.16  
2.15  
2.12  
2.11  
2.09  
2.09  
1.53  
1.51  
1.45  
1.34  
0.96  
0.91

**19j** (<sup>1</sup>H NMR, 400MHz, CDCl<sub>3</sub>)

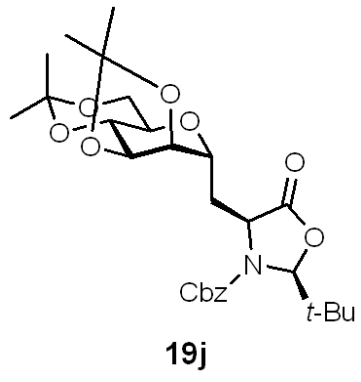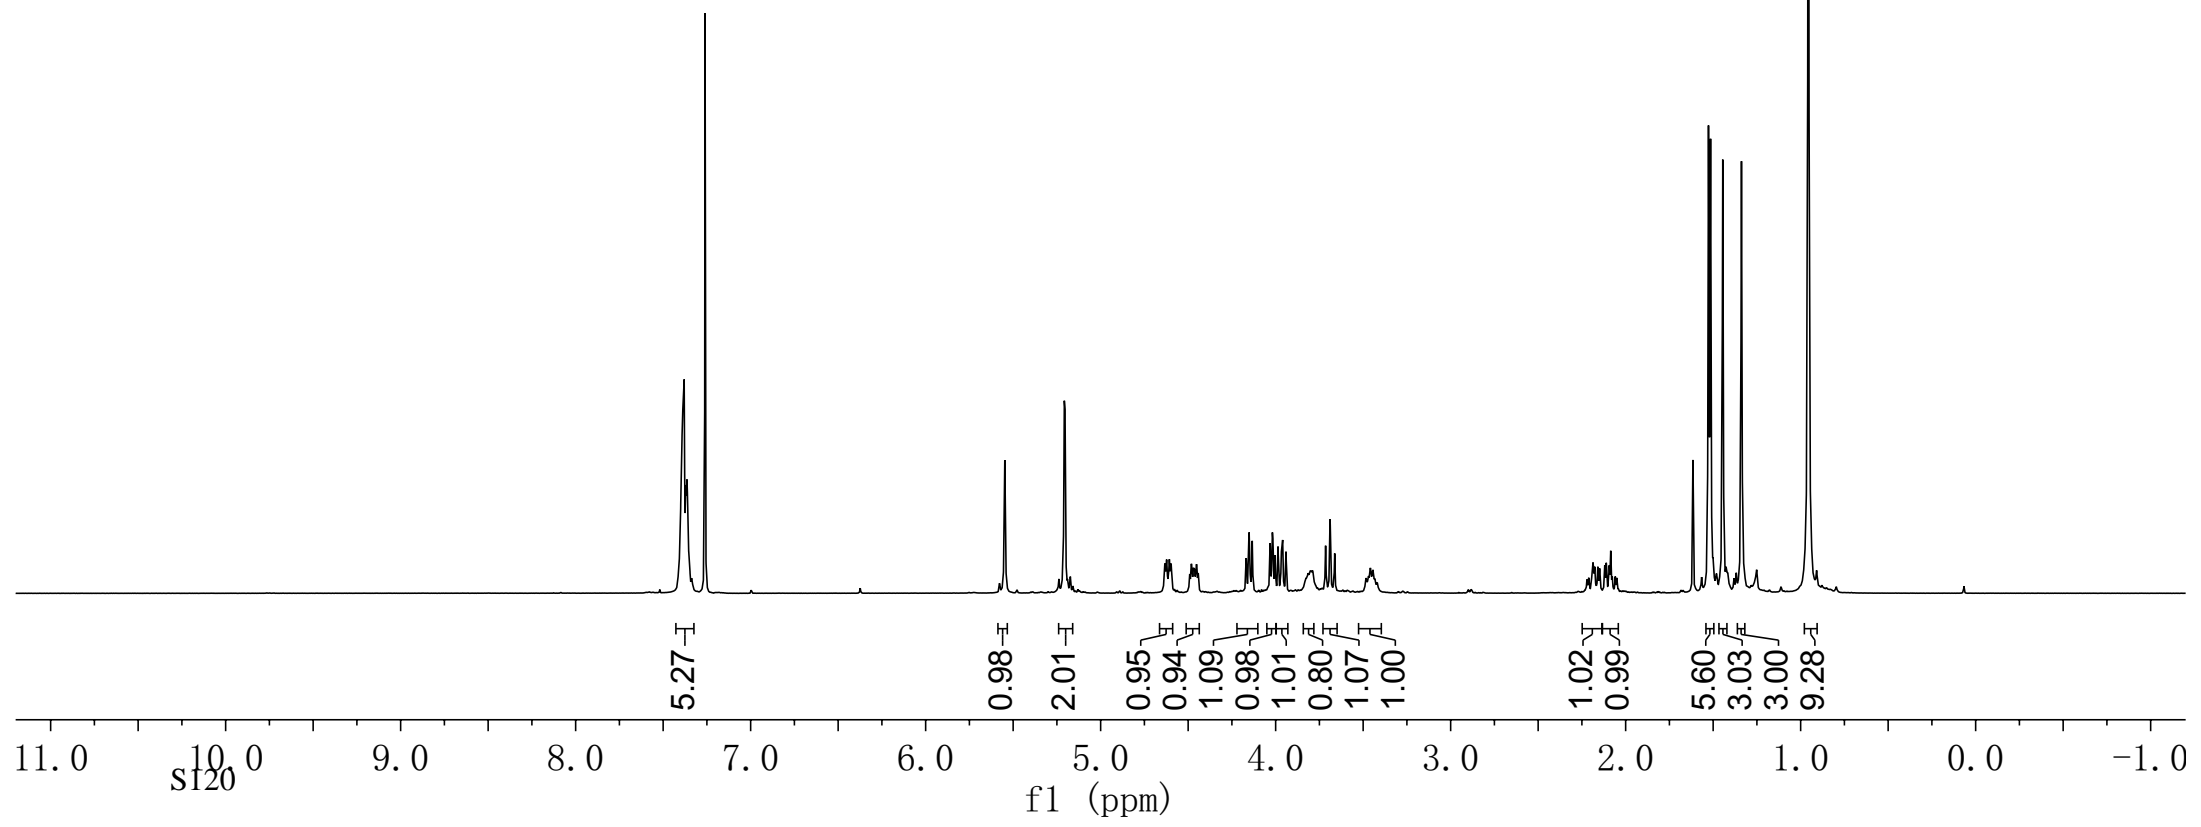

**19j** (<sup>13</sup>C NMR, 101MHz, CDCl<sub>3</sub>)

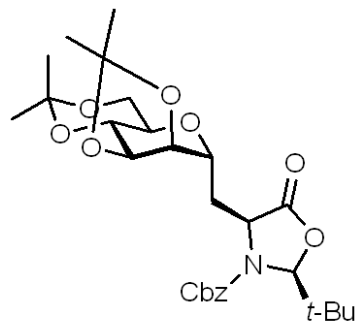

—172.22

—155.72

135.46

128.85

128.83

128.63

—109.93

—99.74

—96.31

77.16

76.69

75.42

72.59

70.18

68.42

64.11

62.88

—53.21

37.25

35.28

29.21

27.87

25.66

24.99

19.12

210 200 190 180 170 160 150 140 130 120 110 100 90 80 70 60 50 40 30 20 10 0 -10

S121

f1 (ppm)

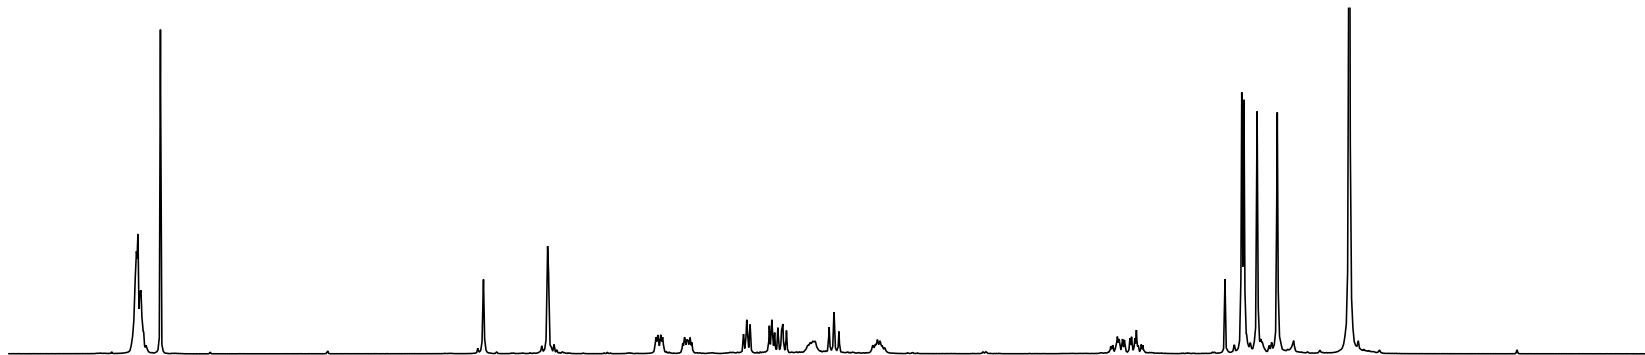

**19j** (<sup>1</sup>H-<sup>1</sup>H COSY)

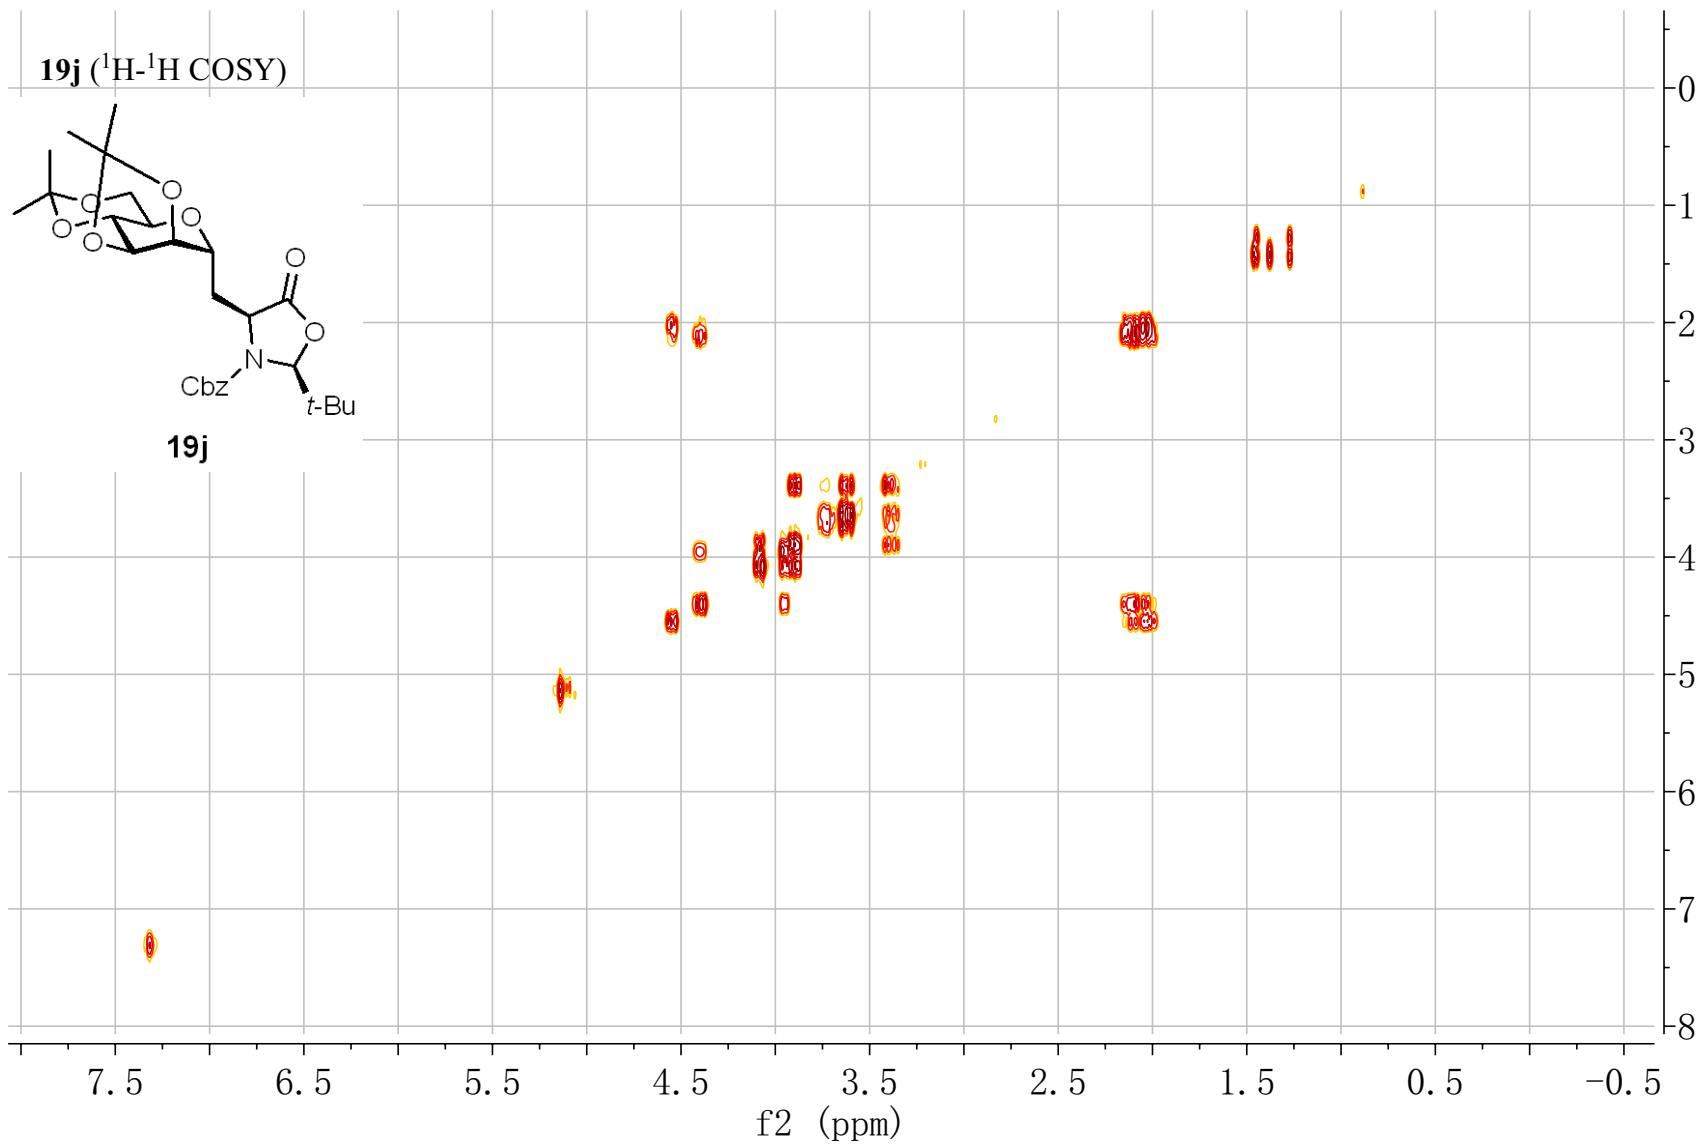

S122

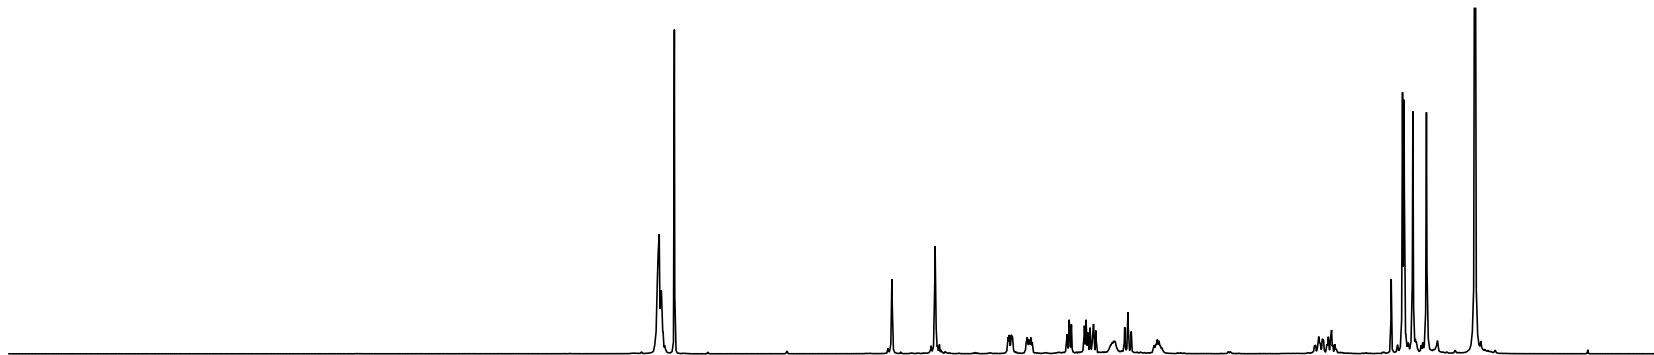

**19j** ( $^1\text{H}$ - $^{13}\text{C}$  Coupled HSQC)

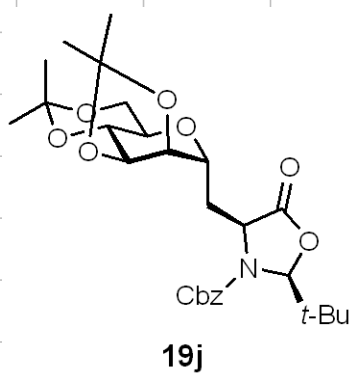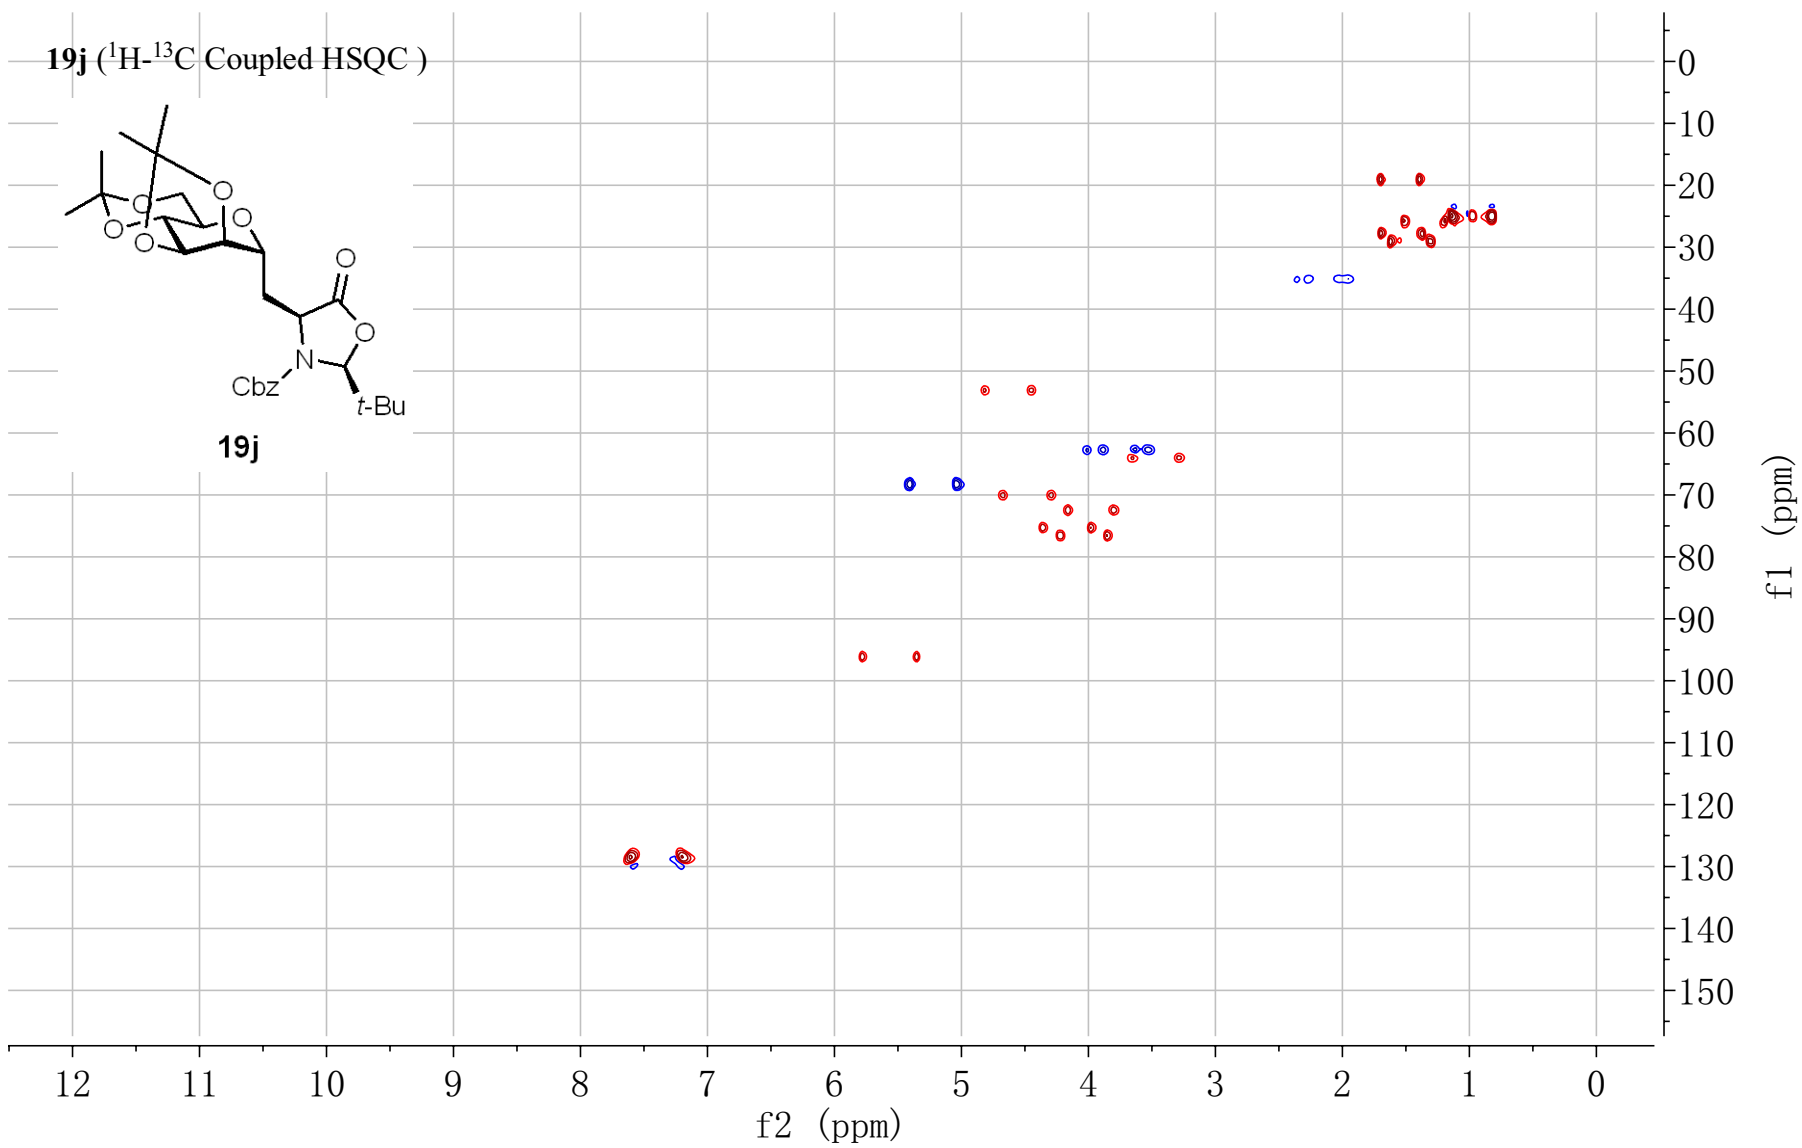

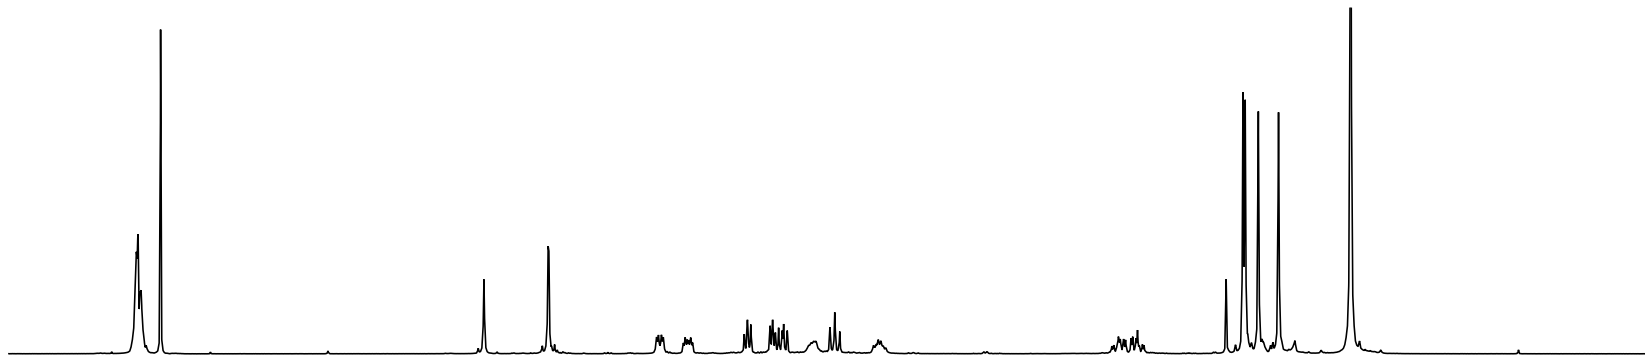

**19j** ( $^1\text{H}$ - $^{13}\text{C}$  HSQC)

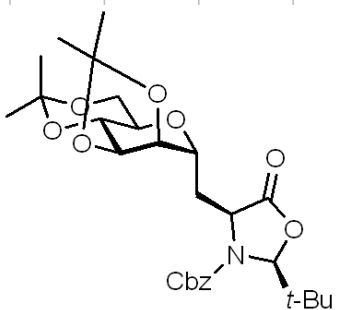

**19j**

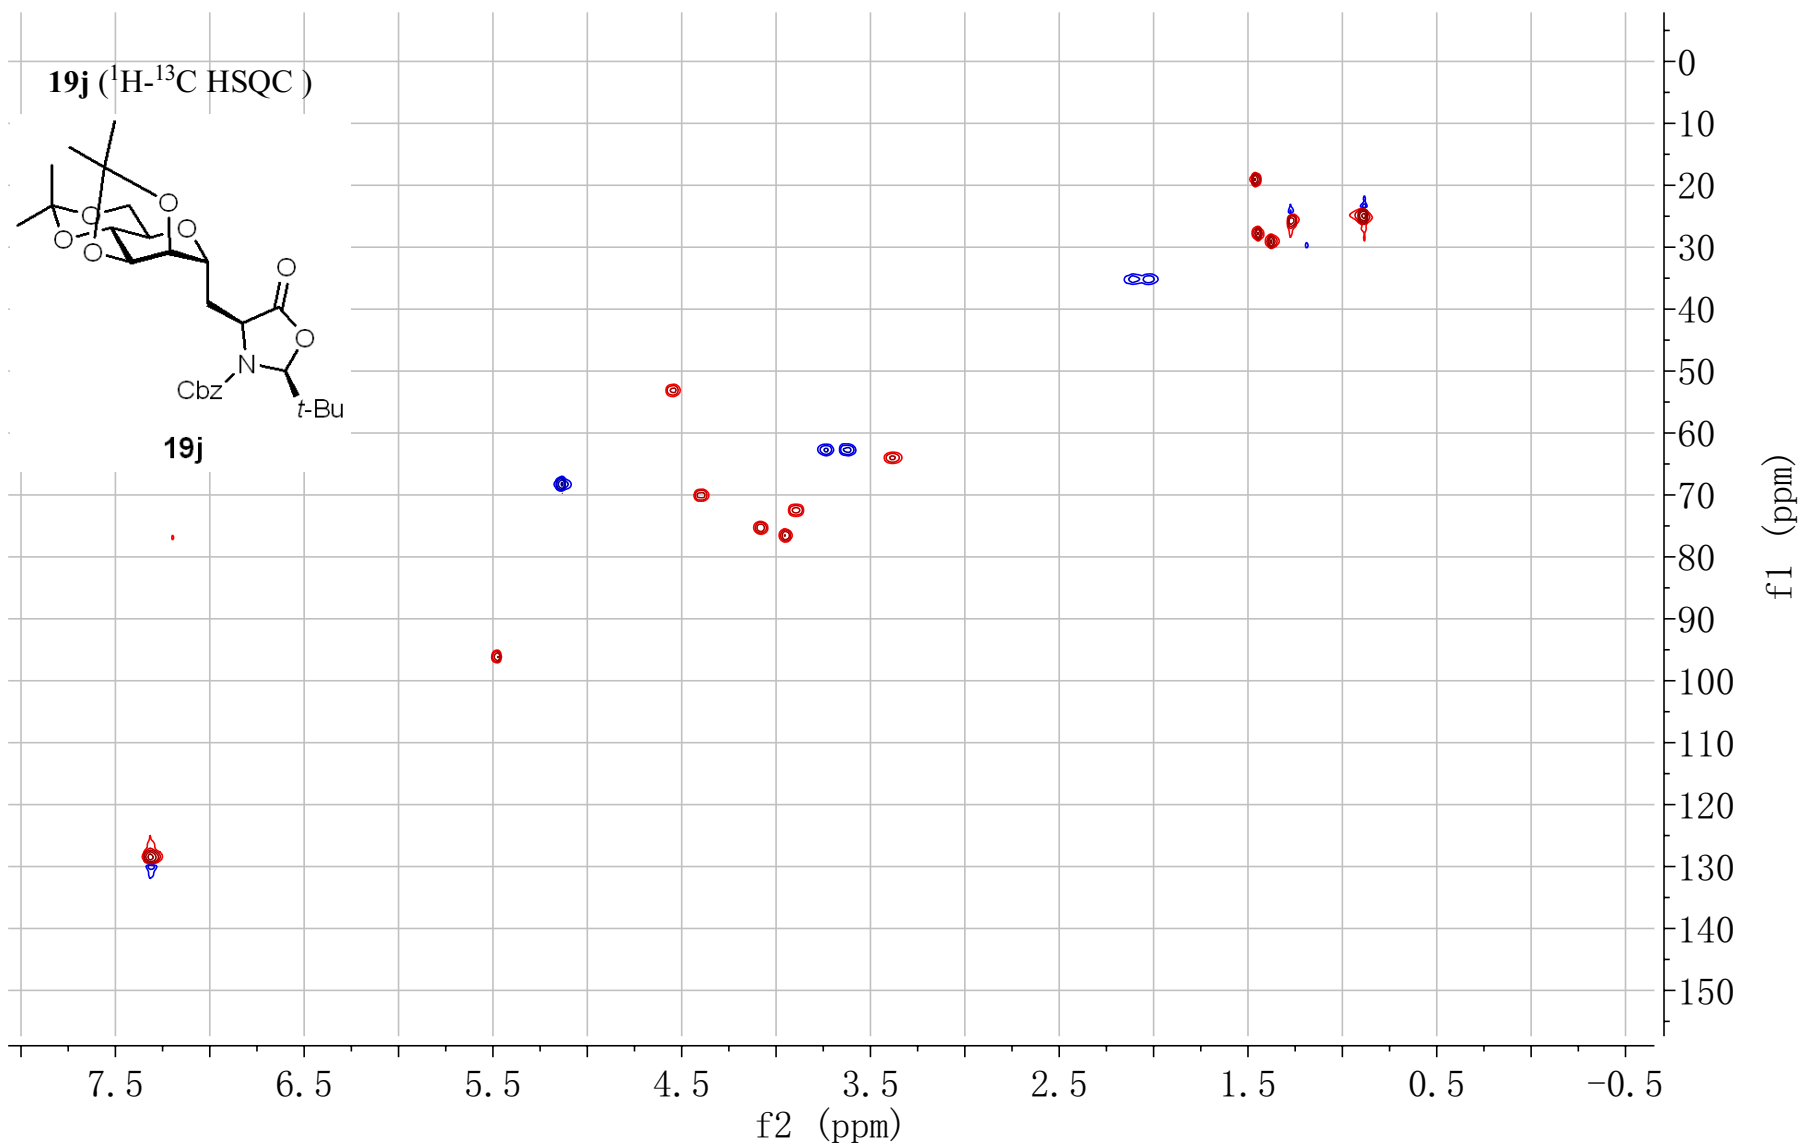

7.26  
7.26  
7.25  
7.24  
7.23  
7.22  
7.21  
7.20  
7.20  
7.19  
7.18  
7.17  
7.16  
7.16  
7.15  
7.15  
7.14  
7.13  
7.13  
7.11  
7.11  
5.43  
5.05  
5.04  
4.64  
4.61  
4.57  
4.56  
4.55  
4.54  
4.53  
4.52  
4.51  
4.50  
4.49  
4.48  
4.48  
4.46  
4.45  
4.42  
4.39  
3.85  
3.84  
3.79  
3.77  
3.66  
3.66  
3.64  
3.64  
3.61  
3.60  
3.60  
3.50  
3.49  
3.48  
2.07  
2.06  
1.84  
0.84

**19k** (<sup>1</sup>H NMR, 400MHz, CDCl<sub>3</sub>)

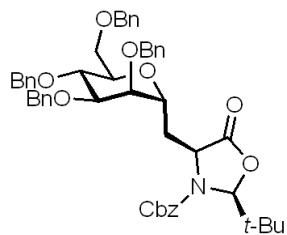

**19k**

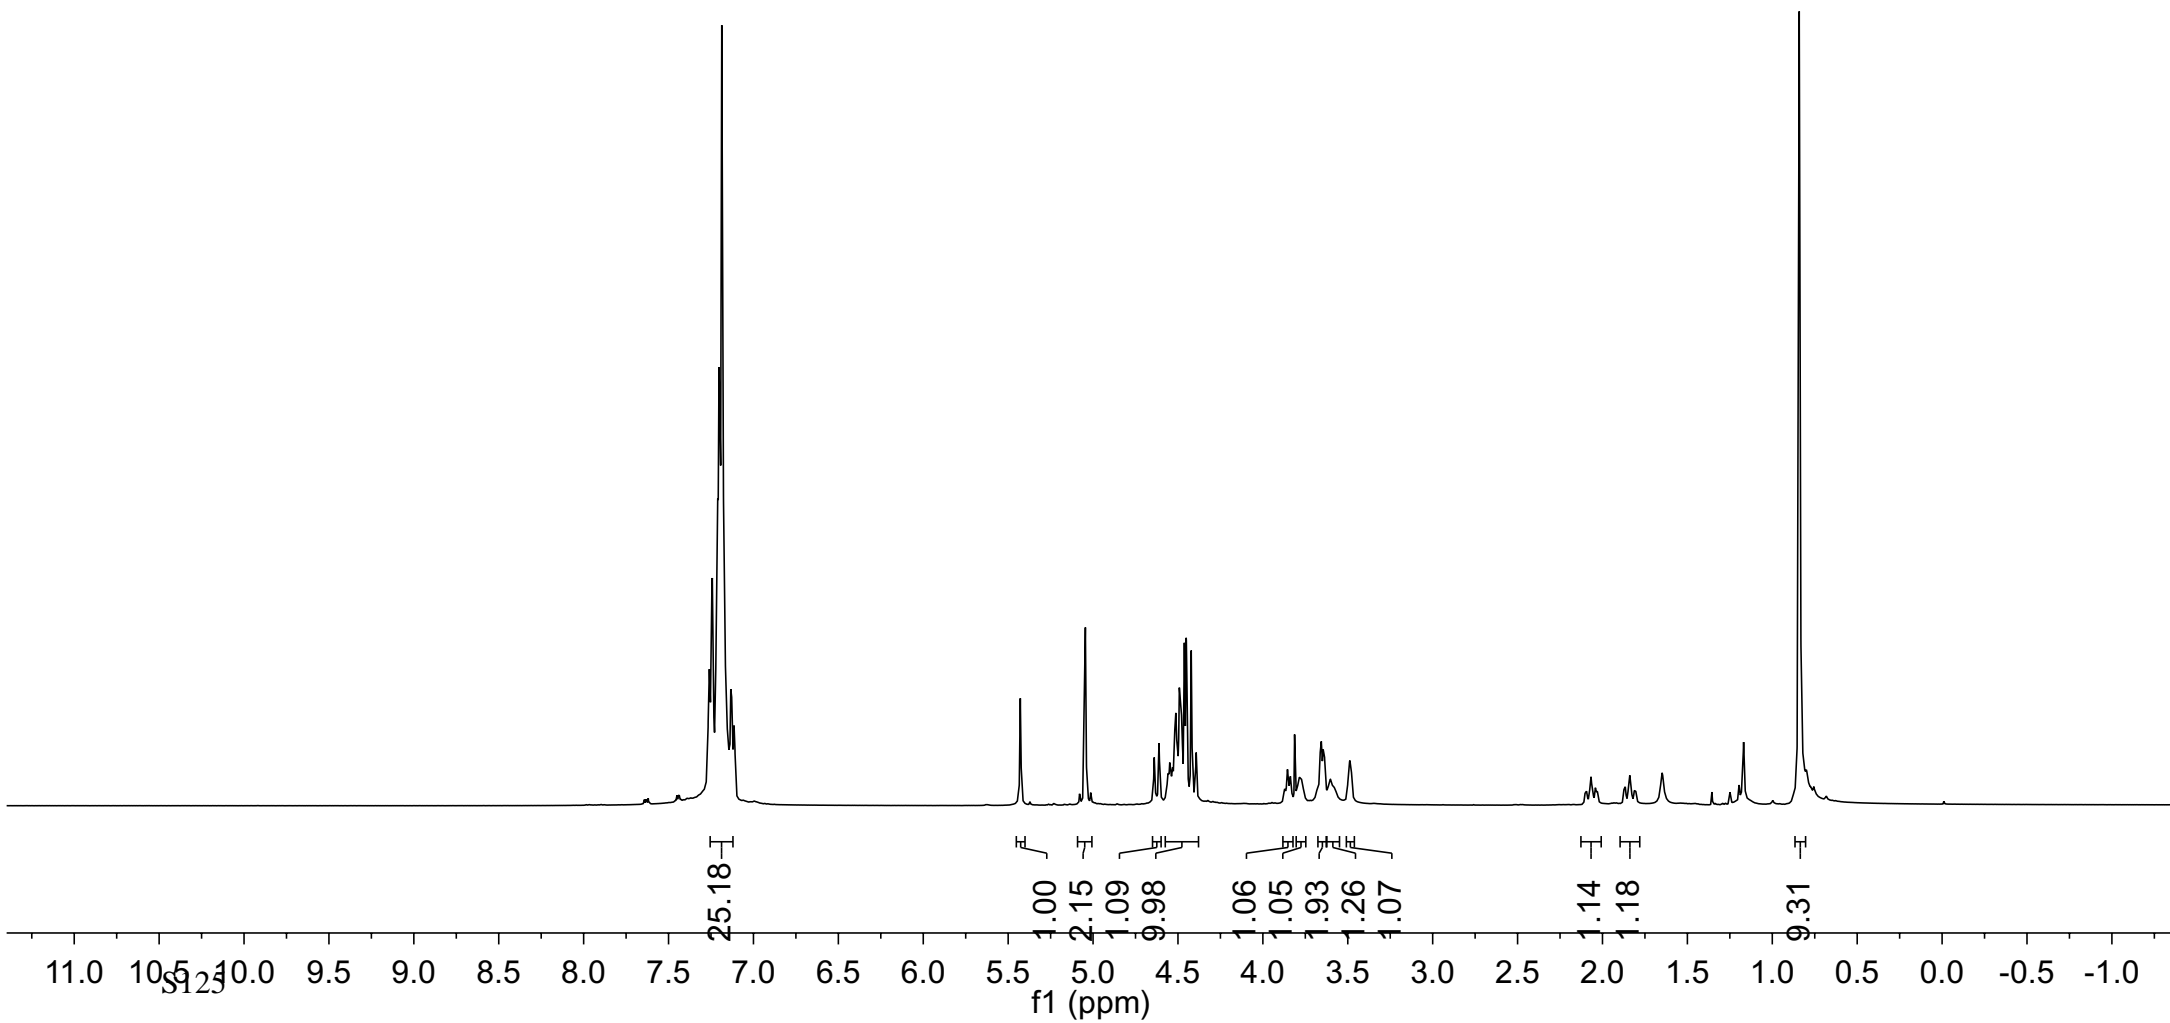



172.32  
 155.67  
 138.57  
 138.50  
 138.30  
 138.24  
 135.49  
 128.77  
 128.55  
 128.43  
 128.40  
 128.37  
 128.04  
 128.03  
 127.91  
 127.86  
 127.74  
 127.68  
 127.54  
 96.07  
 77.48  
 77.16  
 76.84  
 76.17  
 74.90  
 73.97  
 73.50  
 72.16  
 71.31  
 69.25  
 68.17  
 53.36  
 52.76  
 37.17  
 33.54  
 24.94

**19k** ( $^{13}\text{C}$  NMR, 101MHz,  $\text{CDCl}_3$ )

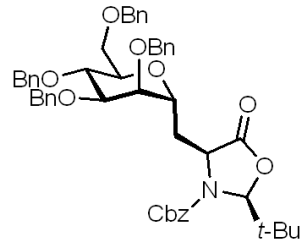

**19k**

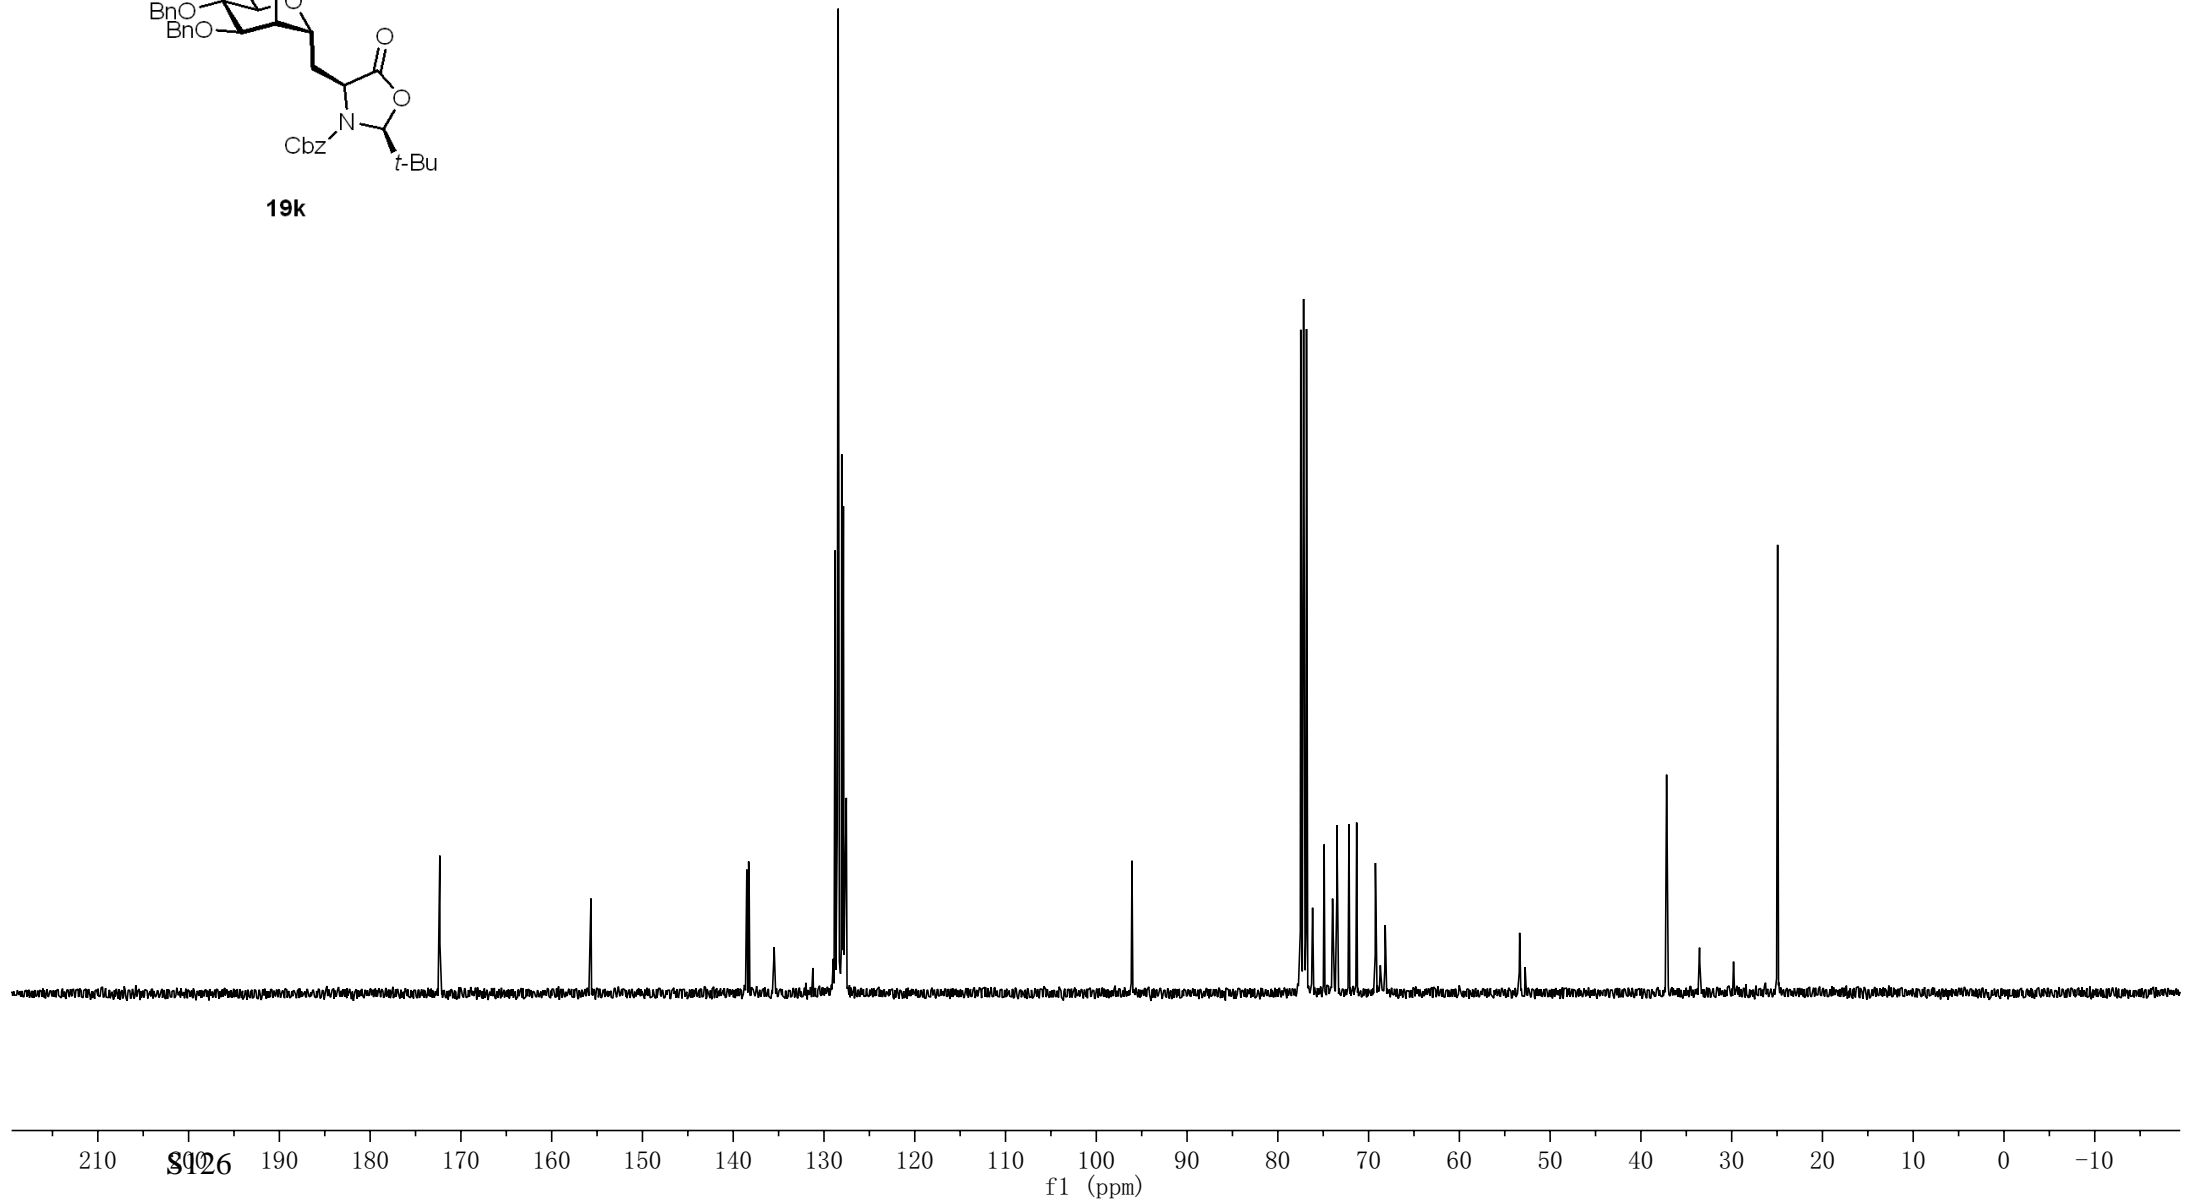

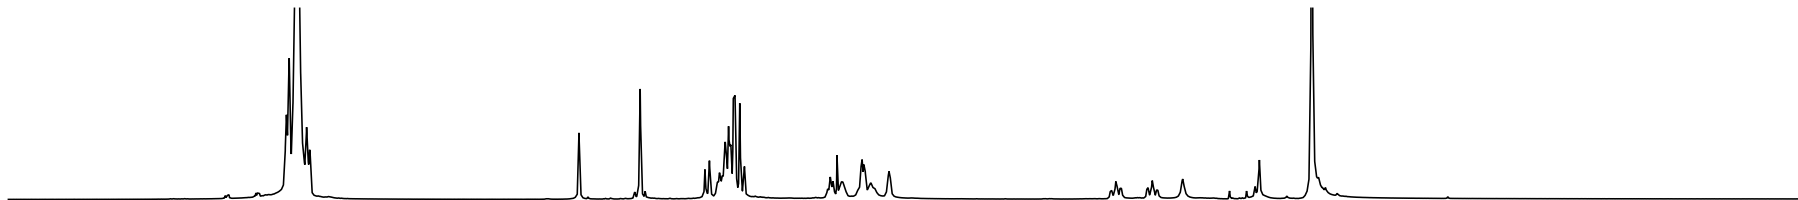

**19k** ( $^1\text{H} - ^1\text{H}$  COSY)

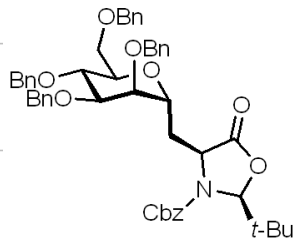

**19k**

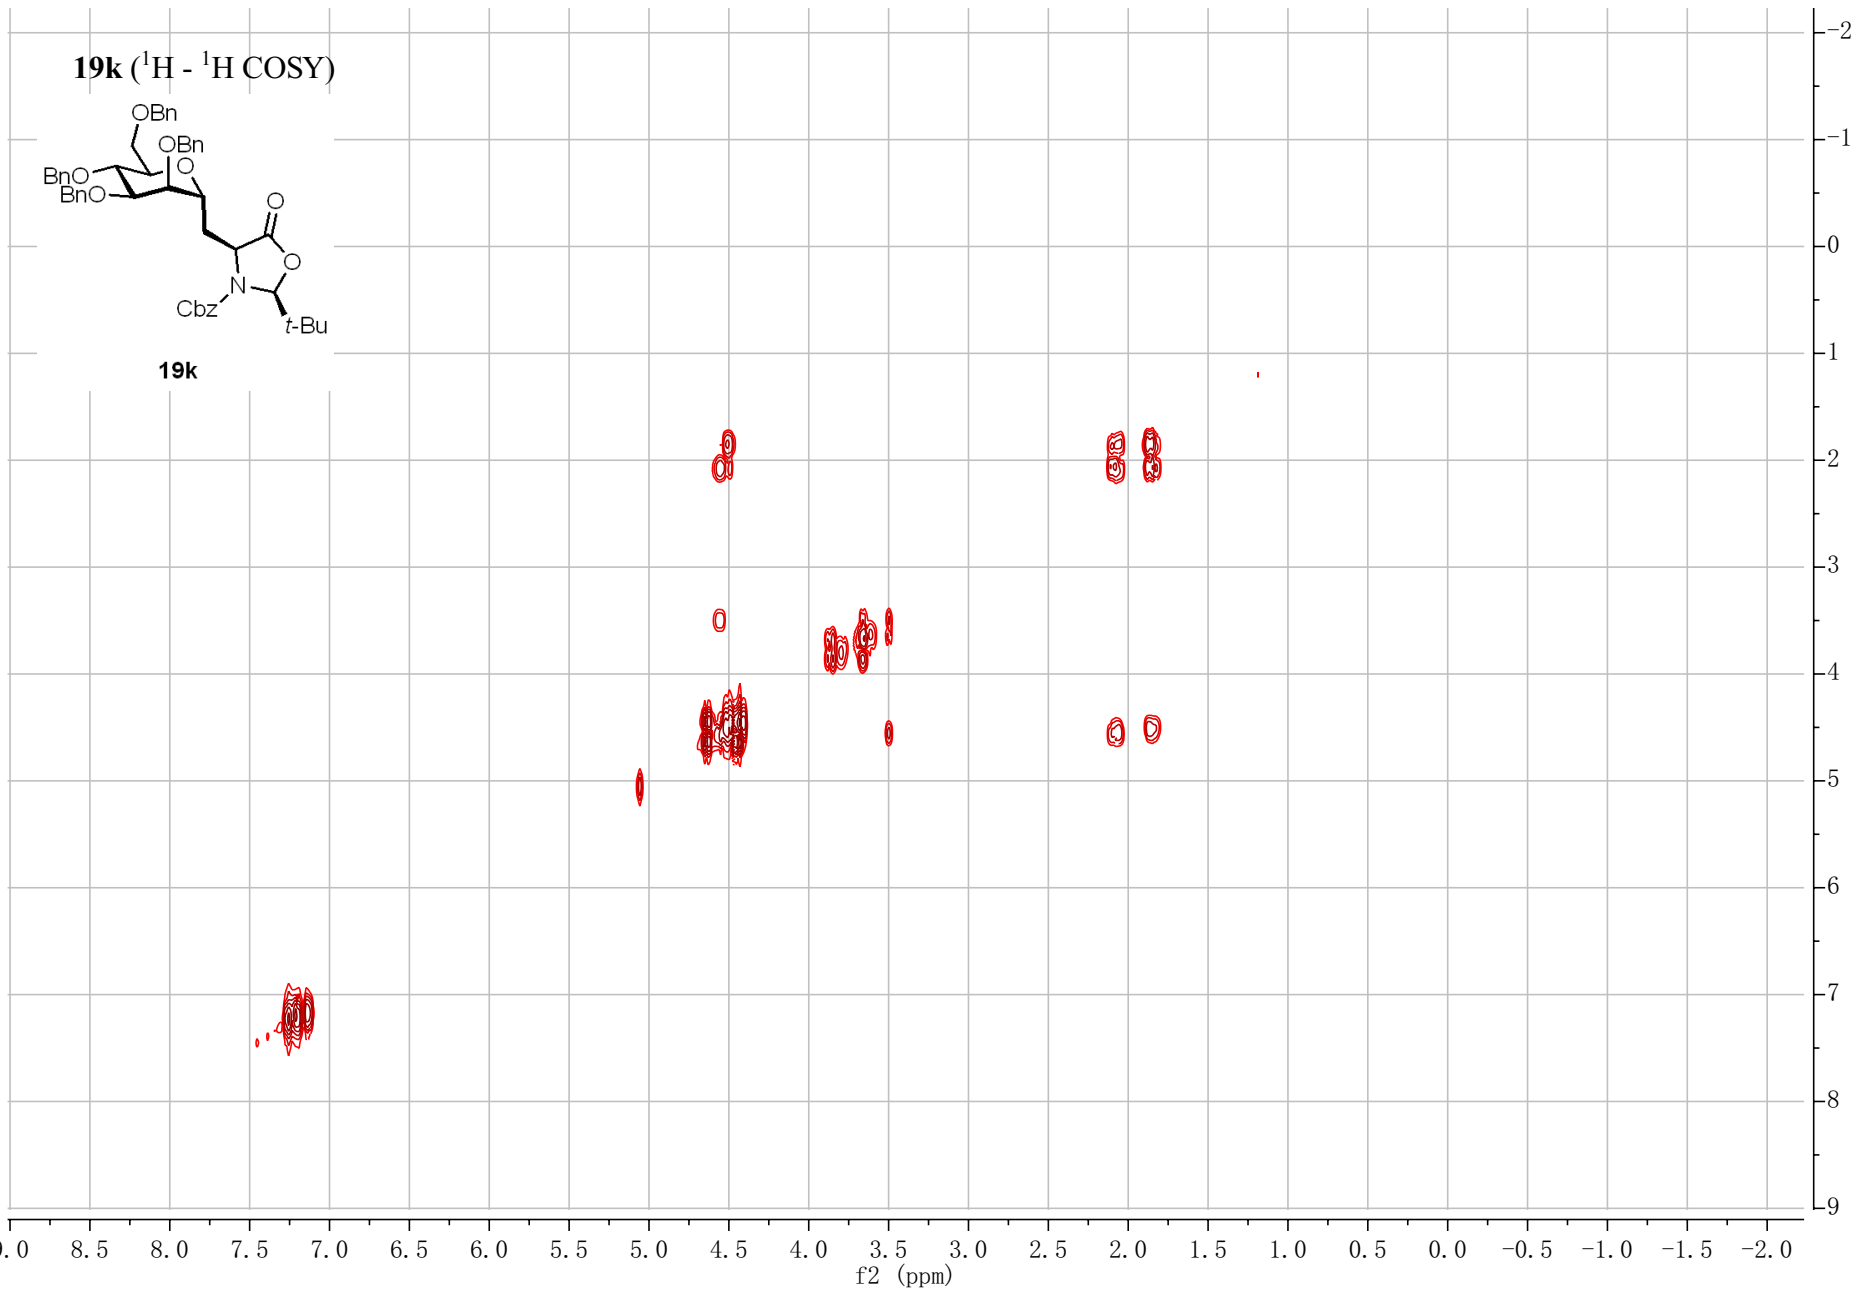

S127

f2 (ppm)

f1 (ppm)

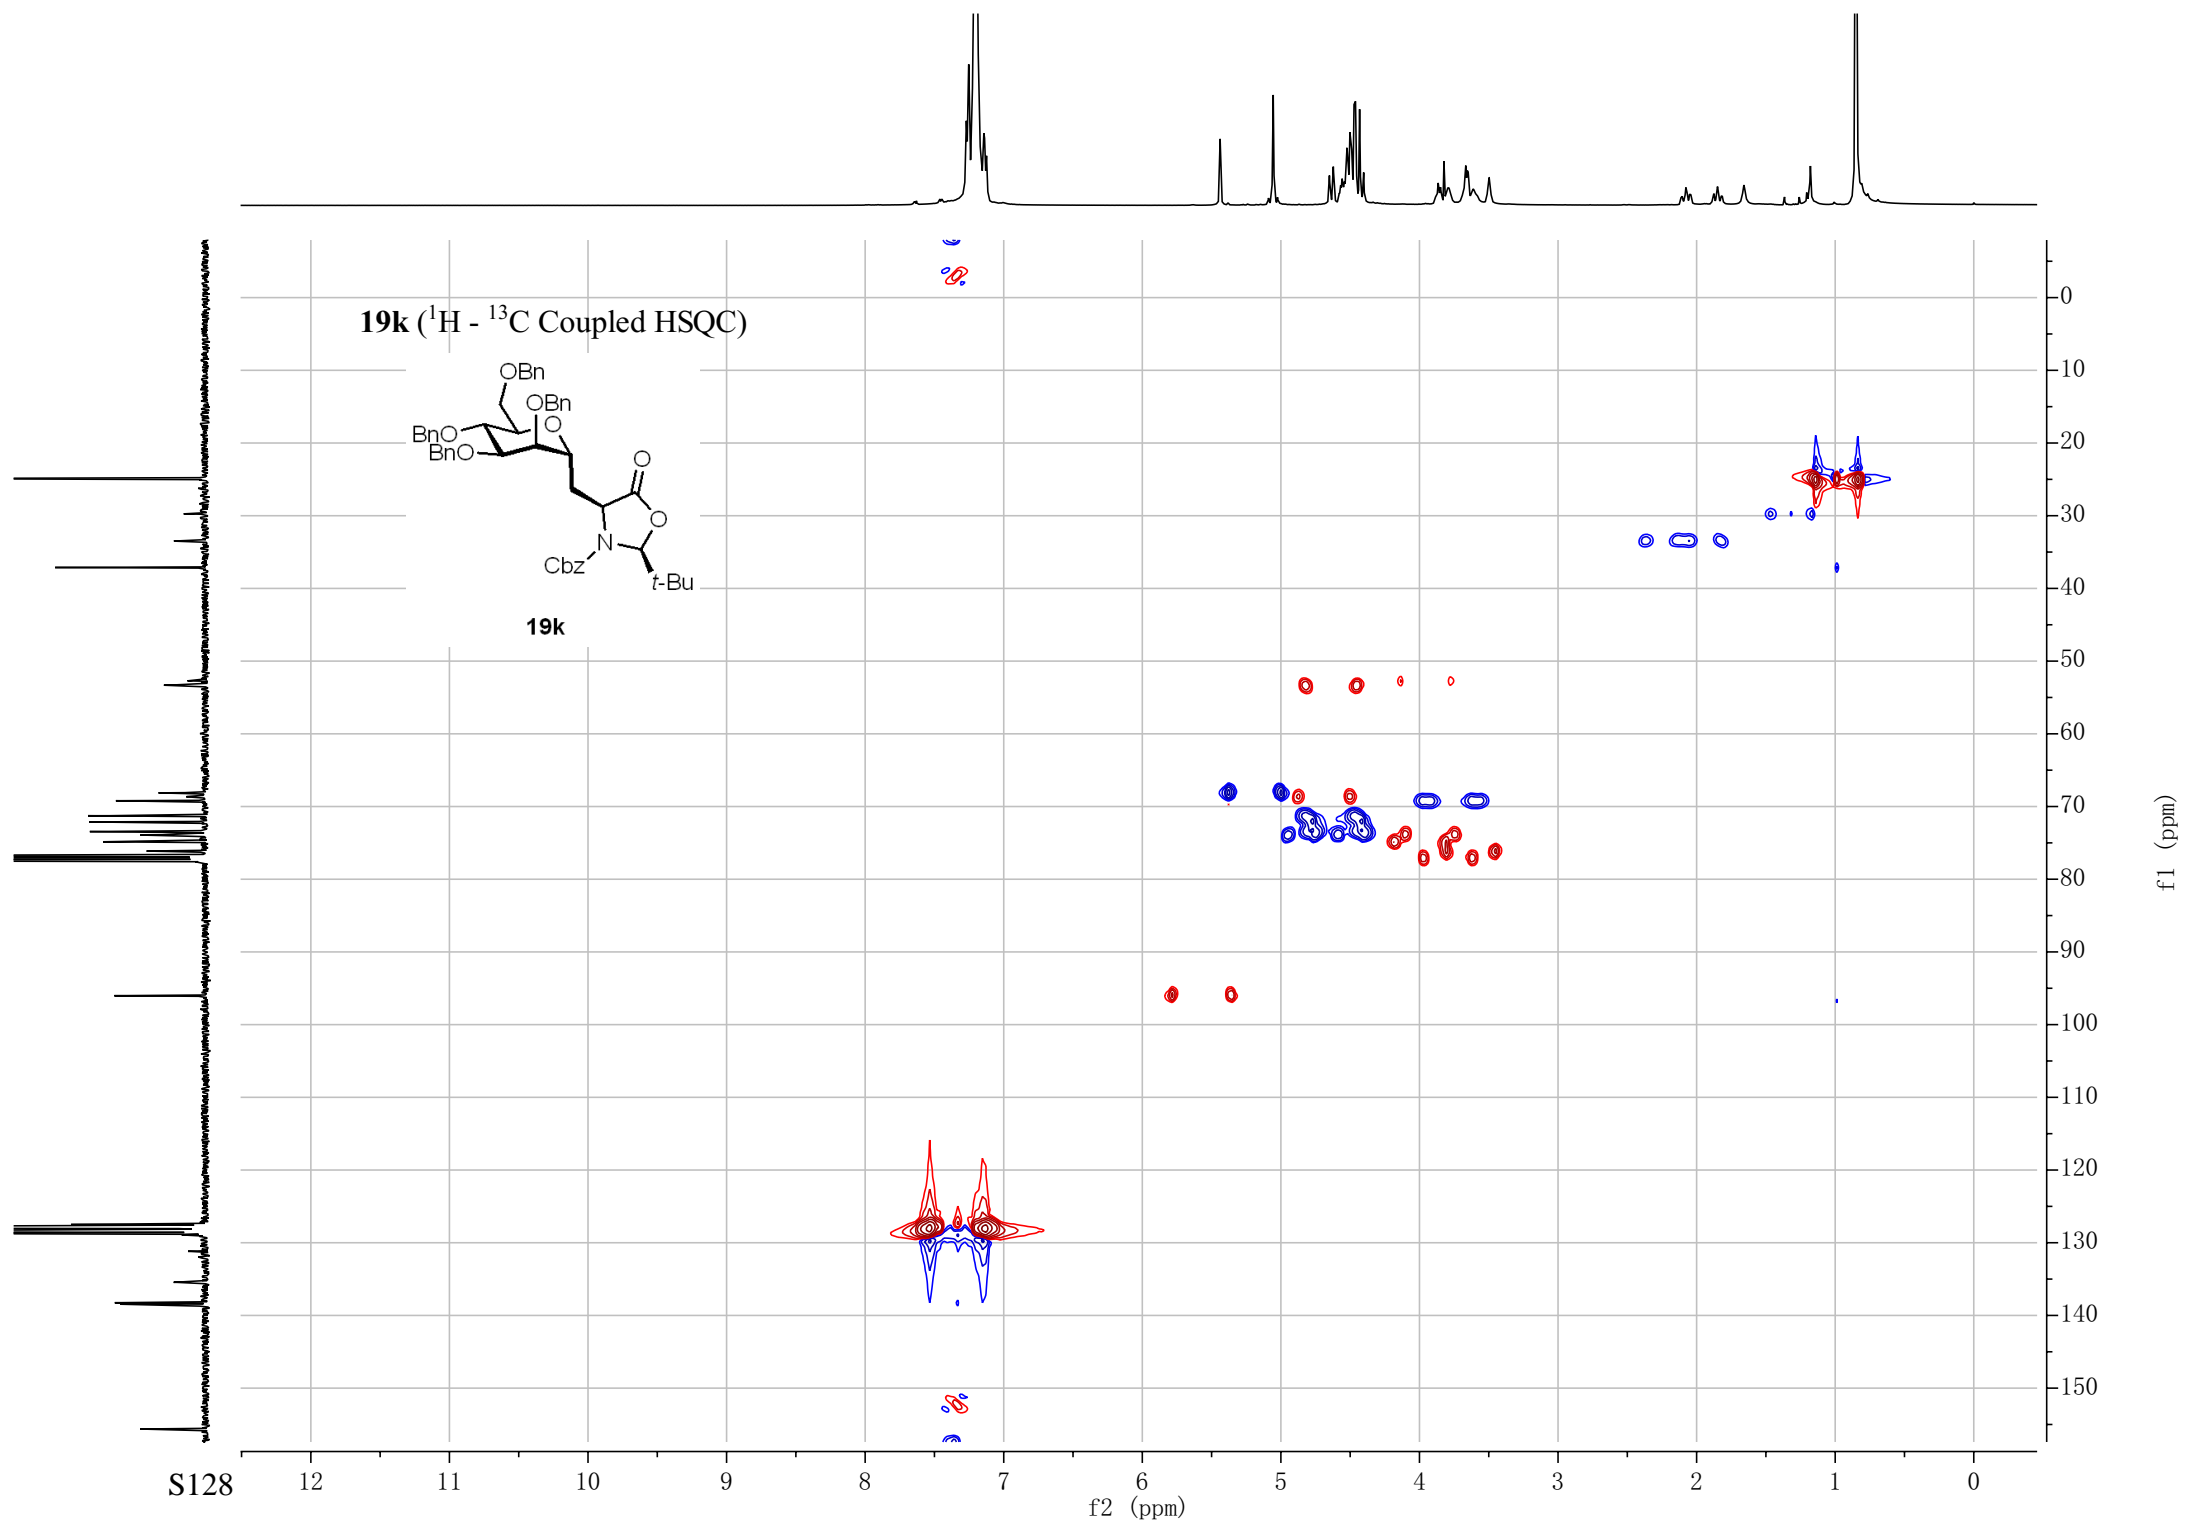

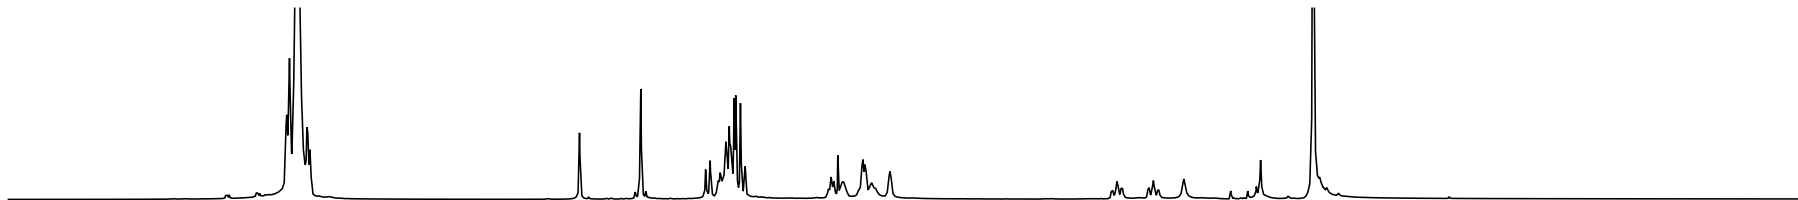

**19k** ( $^1\text{H} - ^{13}\text{C}$  HSQC)

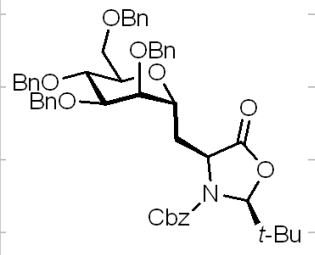

**19k**

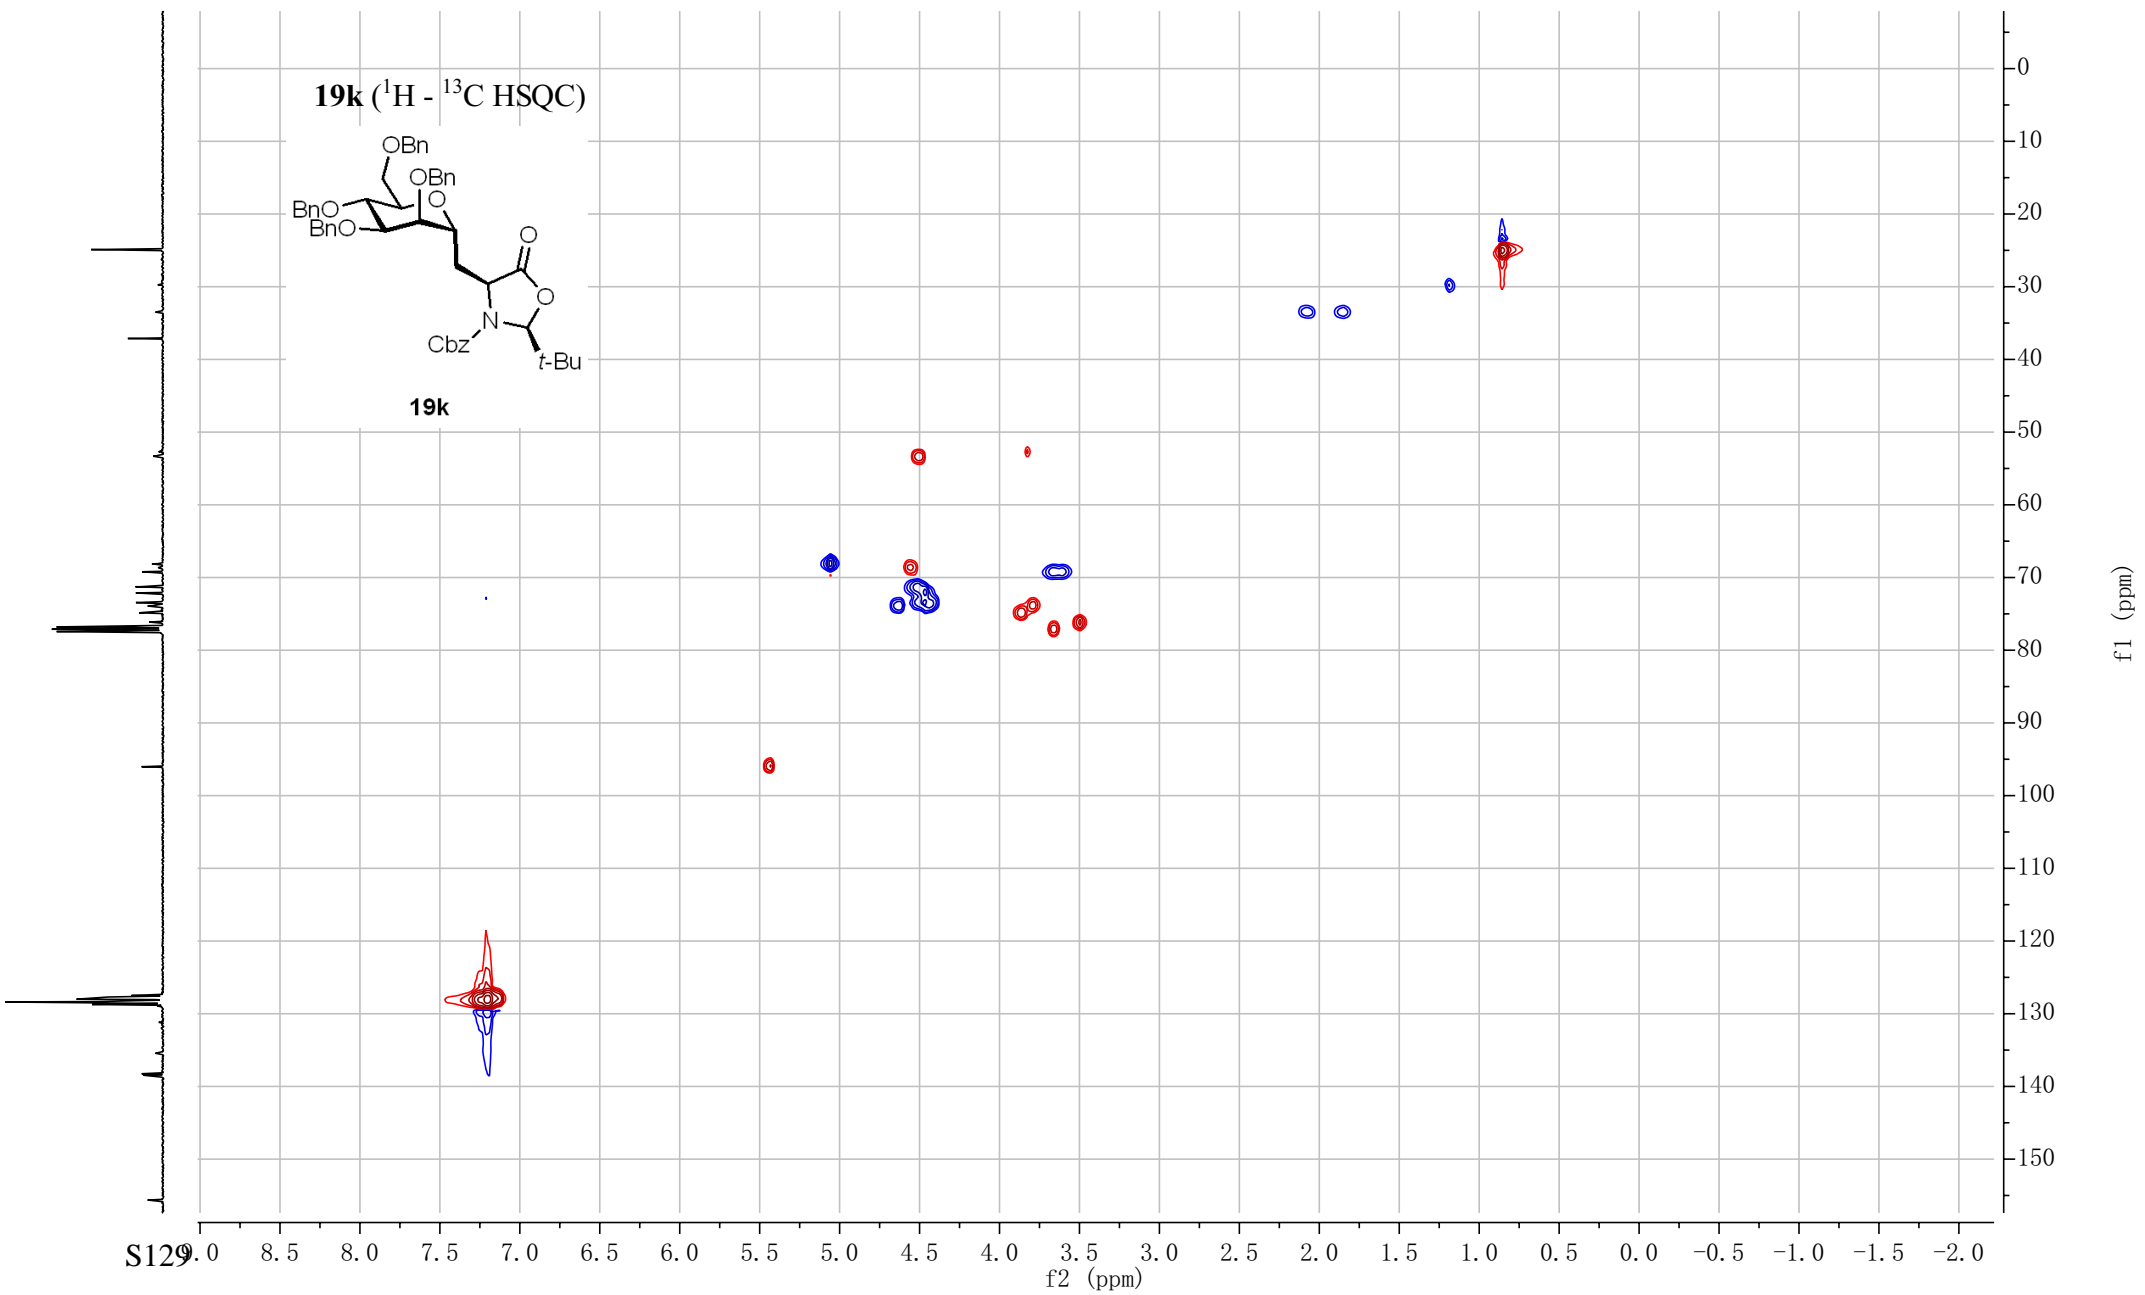

S129

7.39  
7.38  
7.37  
7.37  
7.36  
7.35  
7.35  
7.34  
7.33  
7.32  
7.31  
5.53  
5.23  
5.21  
5.20  
5.19  
5.17  
5.15  
5.12  
4.57  
4.56  
4.55  
4.53  
4.53  
4.52  
4.16  
4.15  
4.12  
4.10  
4.08  
4.01  
2.45  
2.44  
2.41  
2.40  
2.38  
2.37  
2.10  
2.04  
2.03  
2.00  
1.98  
1.97  
1.96  
1.94  
1.93  
0.93

**191** (<sup>1</sup>H NMR, 400MHz, CDCl<sub>3</sub>)

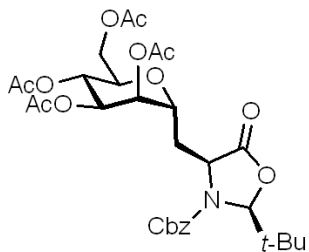

**191**

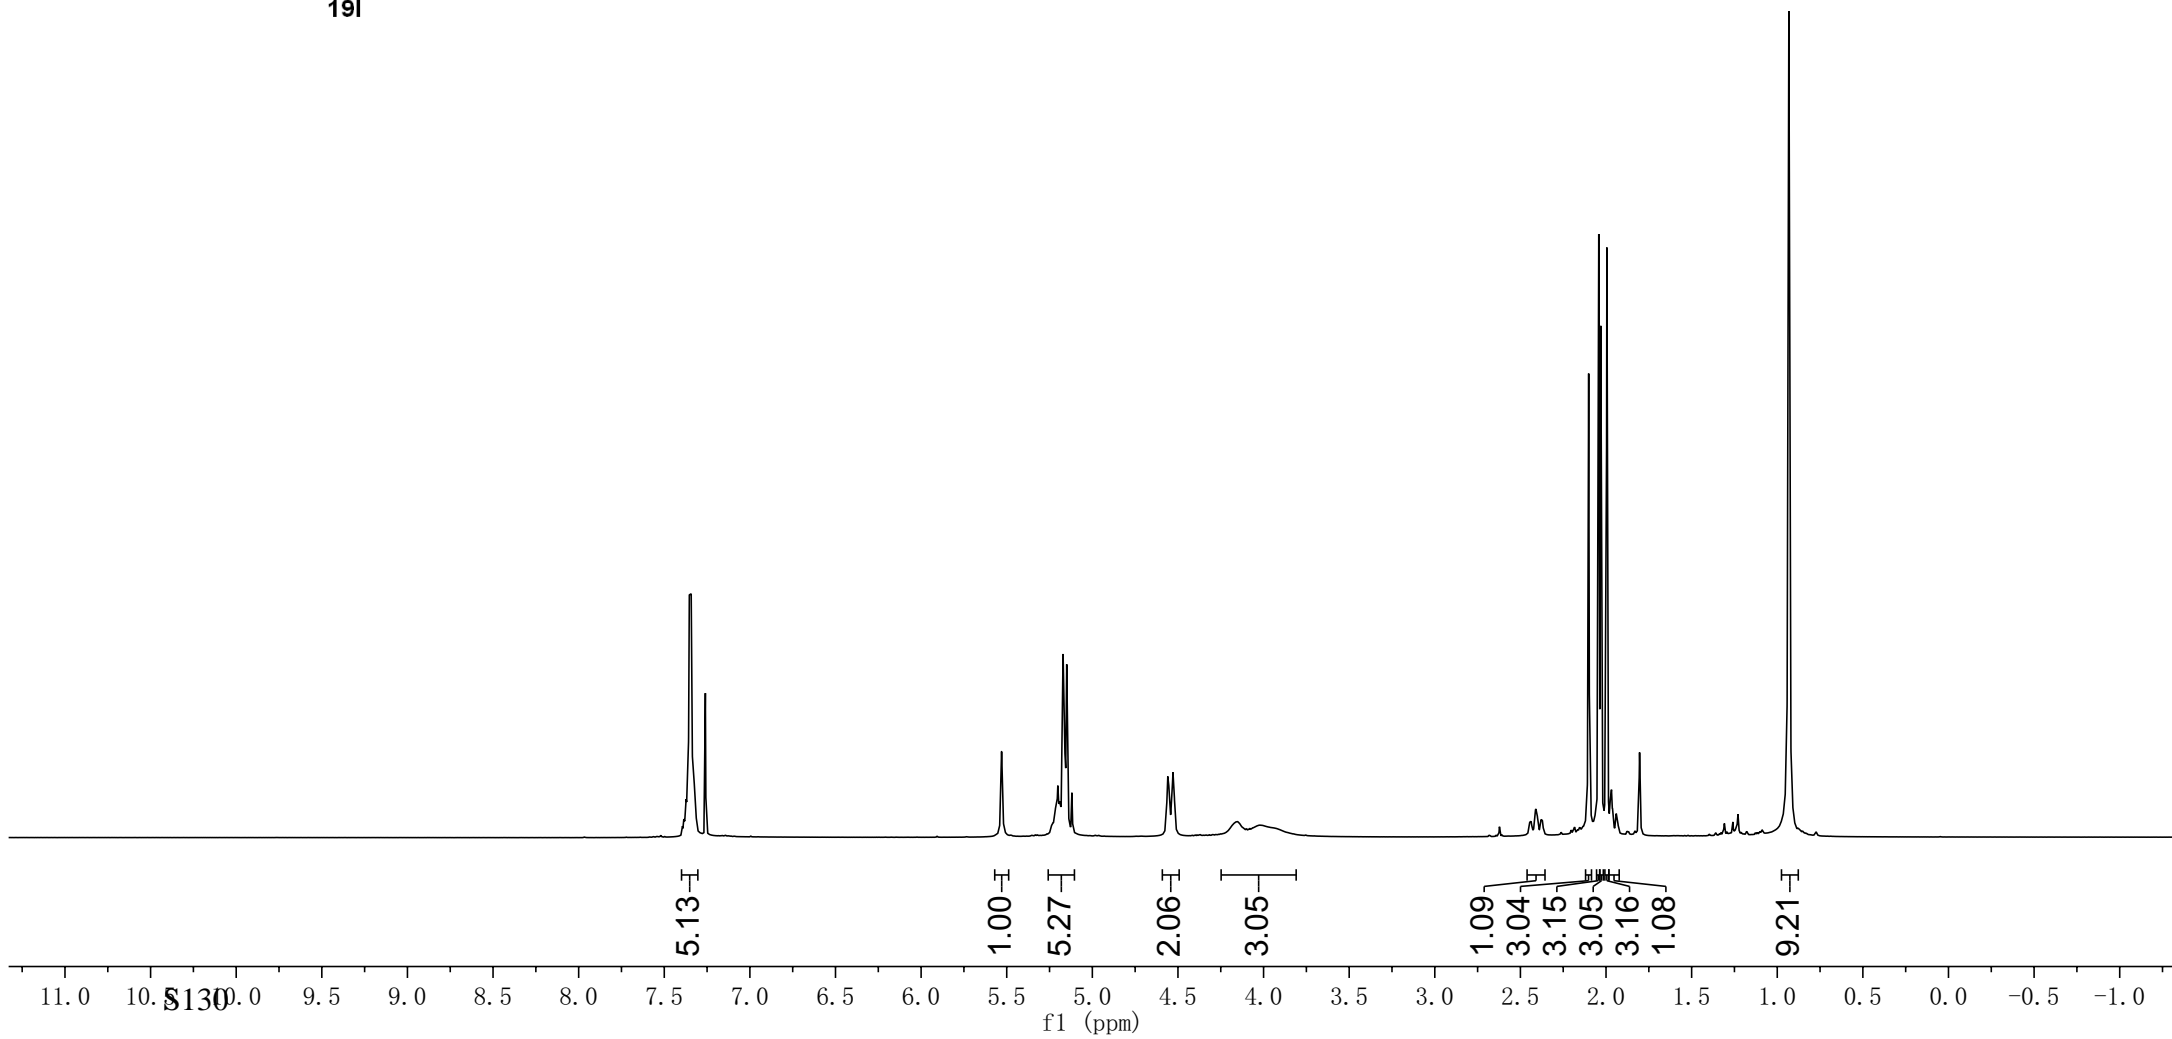

171.7  
170.8  
170.2  
170.2  
169.6  
— 155.5

135.1  
128.9  
128.6

— 96.2  
77.5  
77.2  
76.8  
70.6  
70.2  
68.9  
68.6  
66.5  
62.2  
— 52.6

37.2  
31.8  
24.9  
20.9  
20.9  
20.8

**191** (<sup>13</sup>C NMR, 101MHz, CDCl<sub>3</sub>)

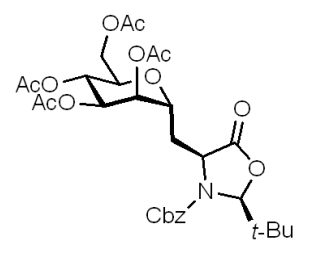

**191**

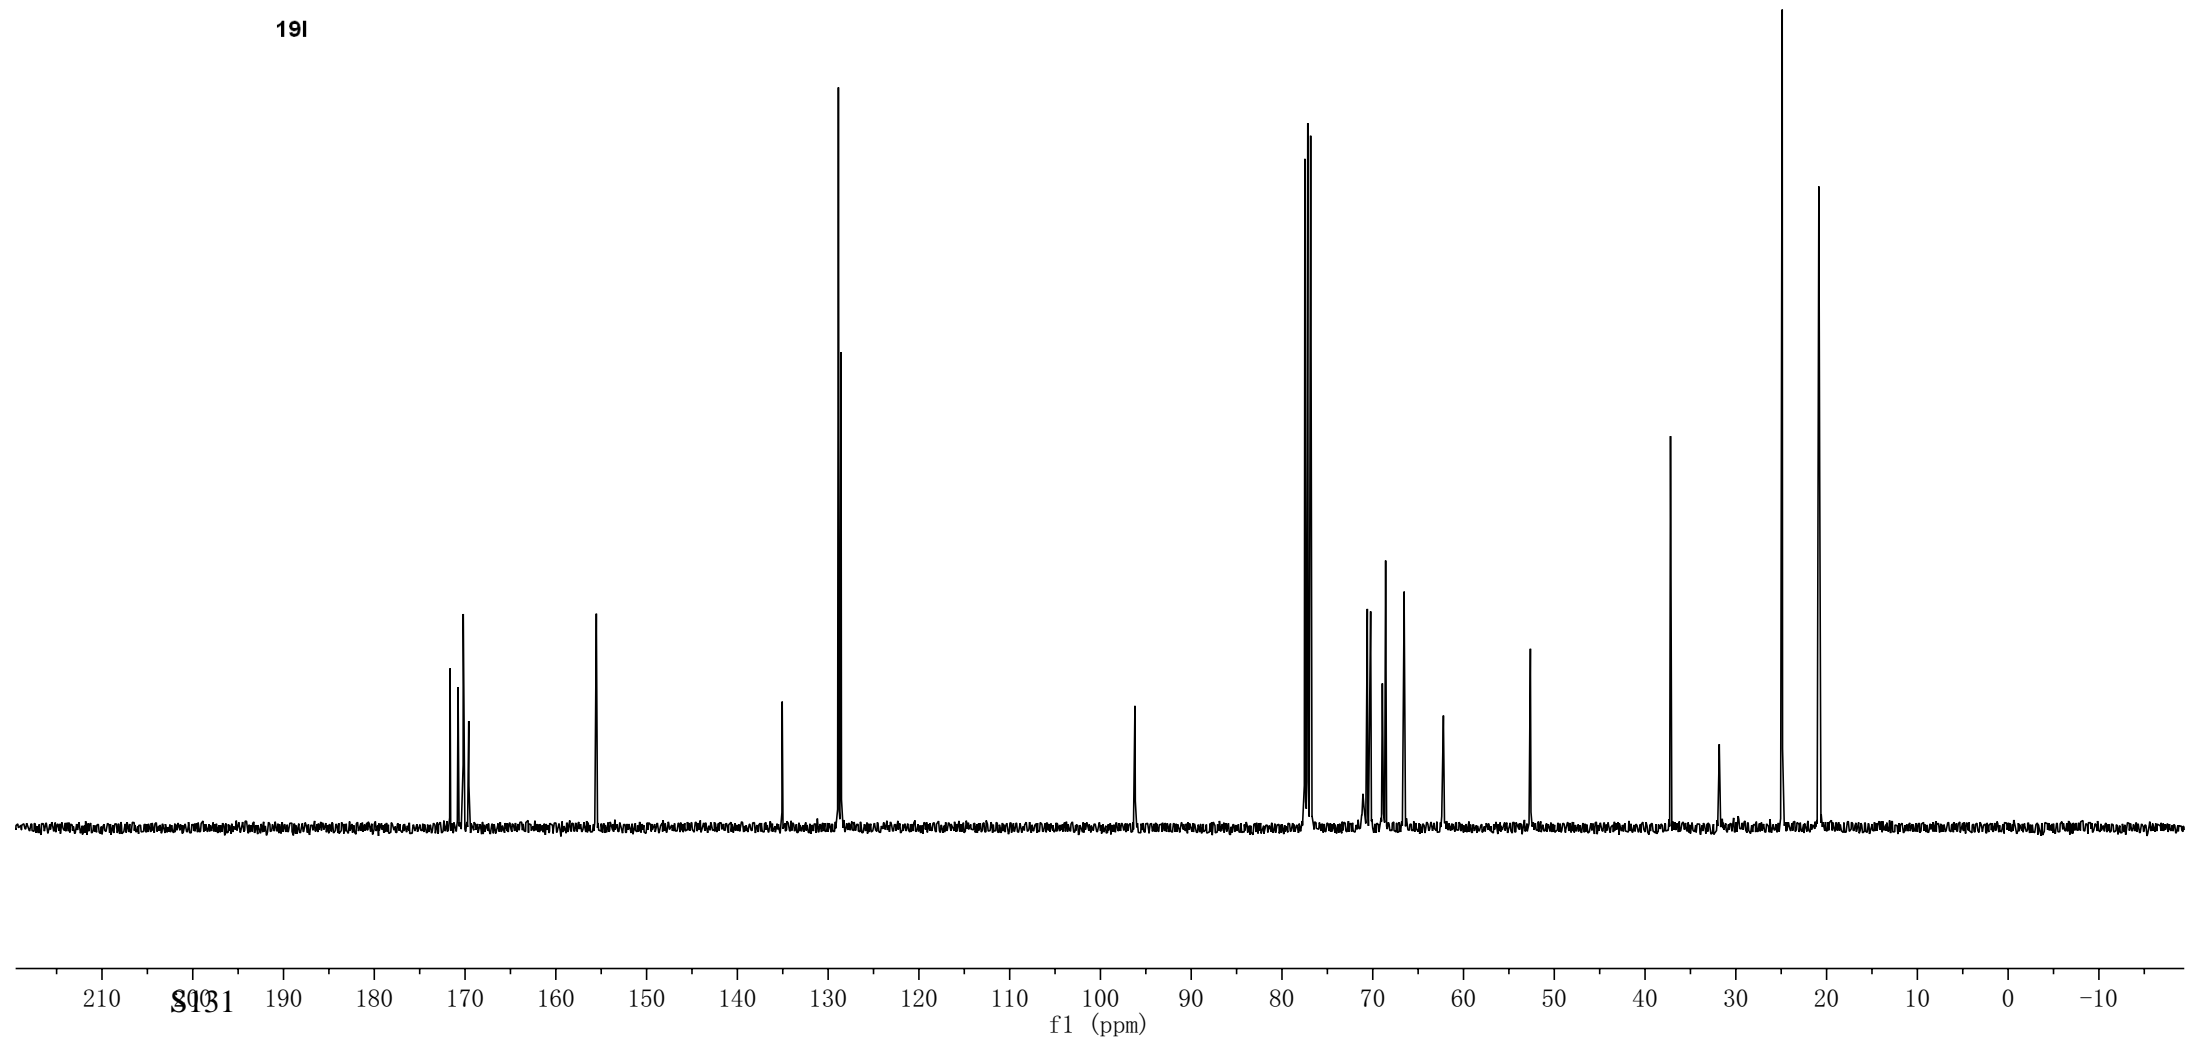

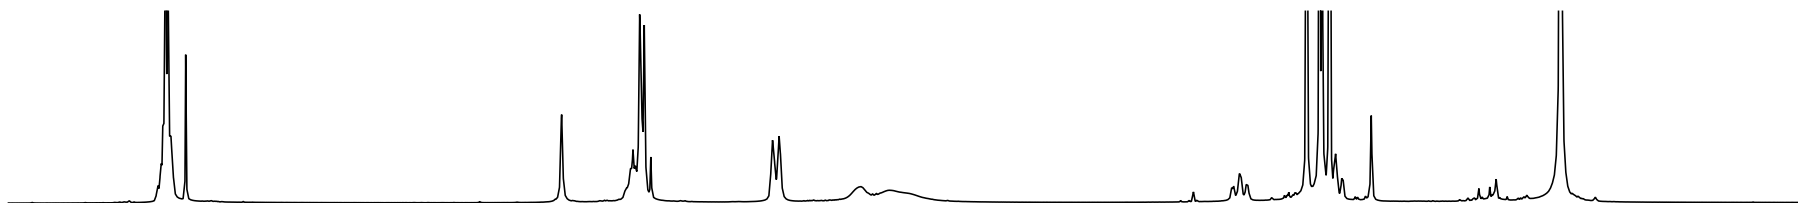

**19I** ( $^1\text{H} - ^1\text{H}$  COSY)

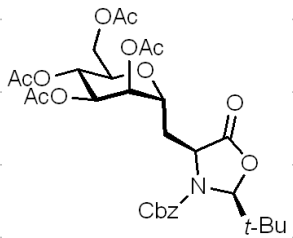

**19I**

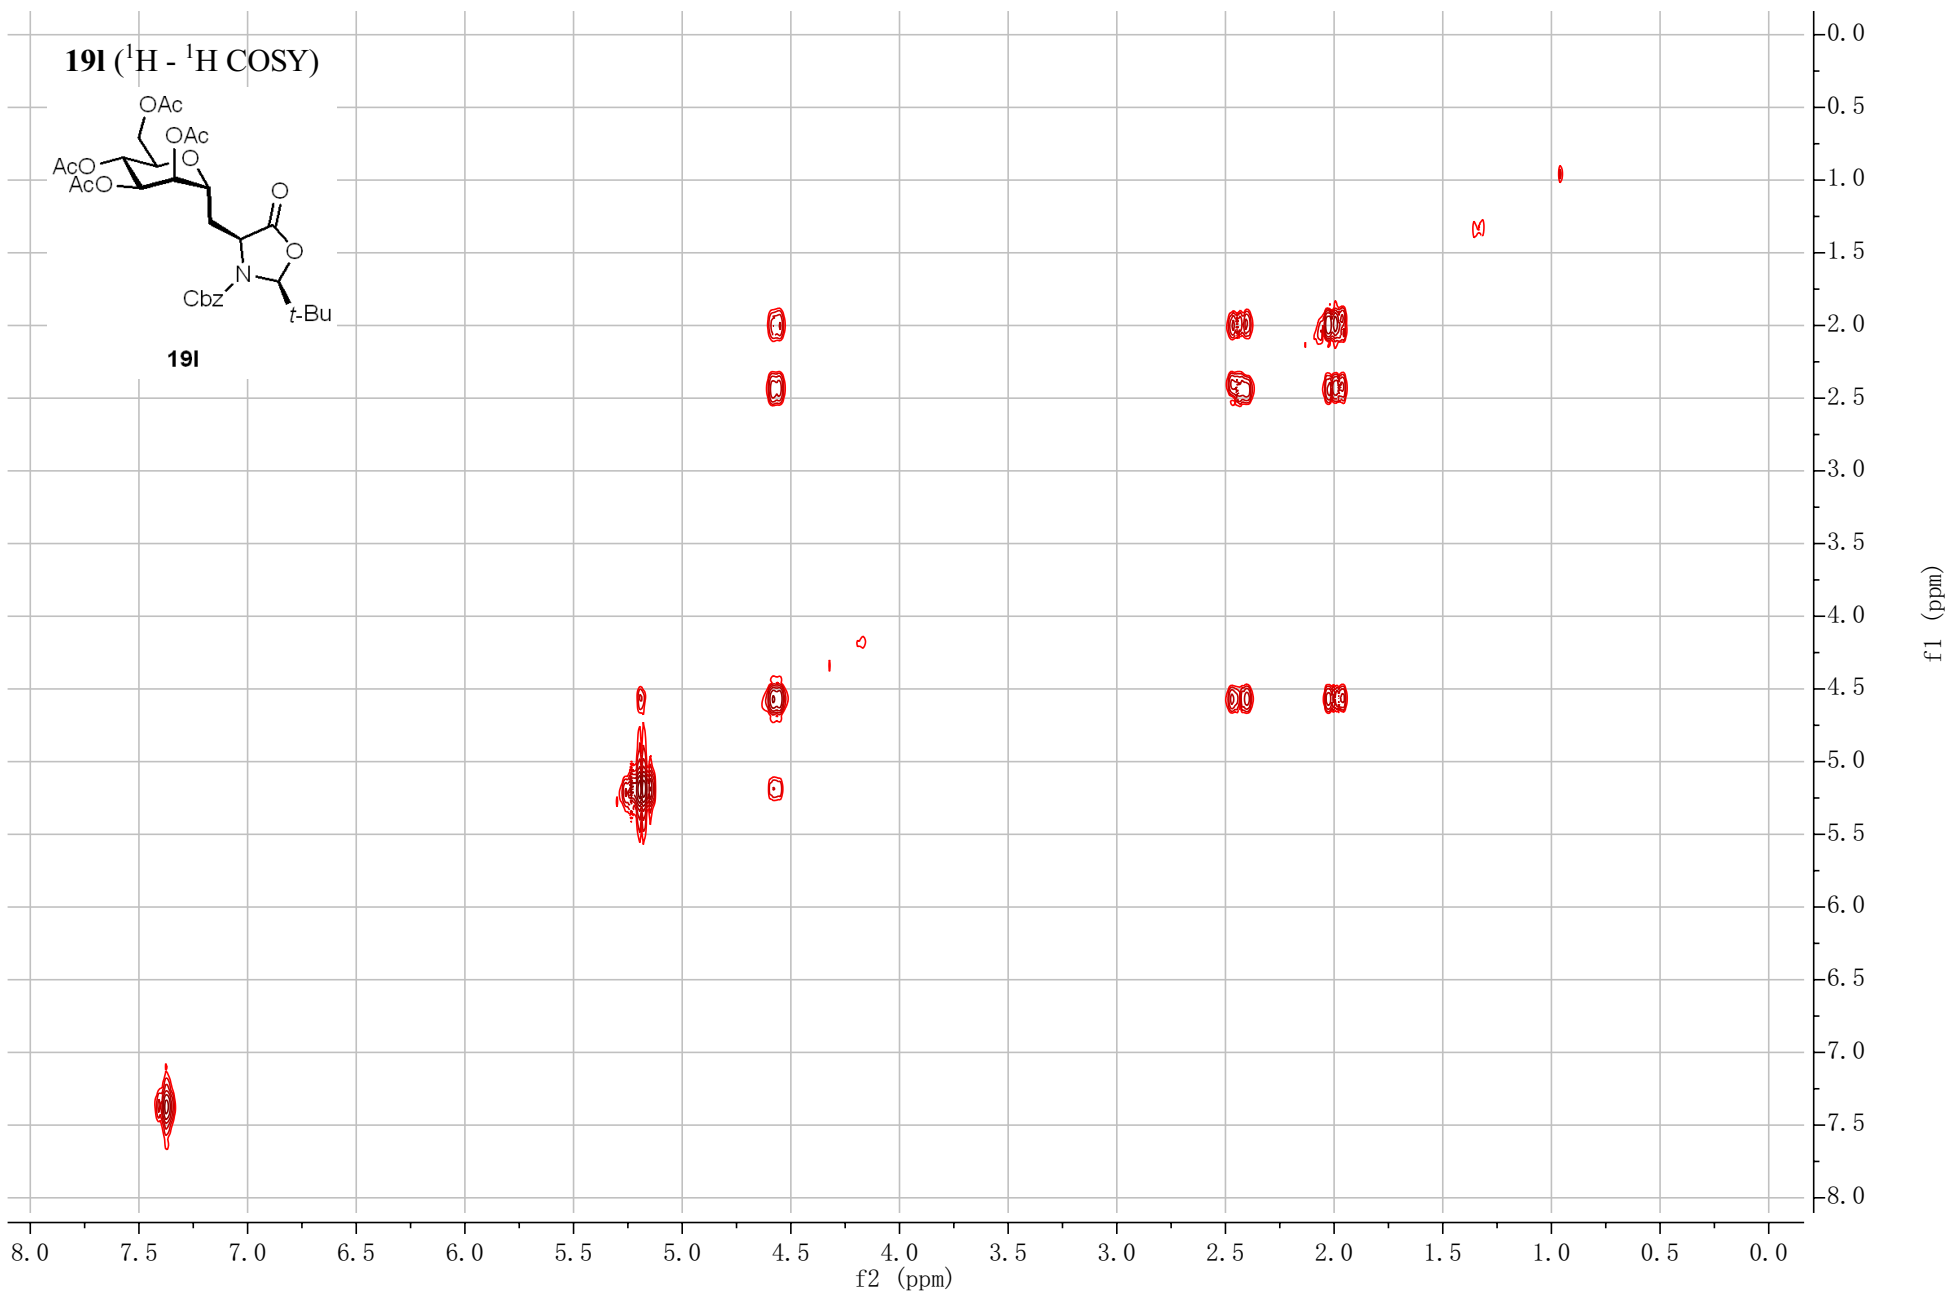

S132

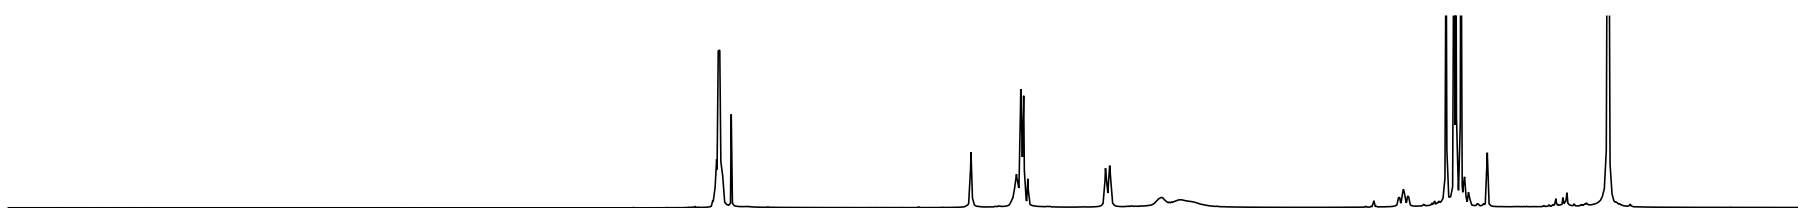

**191** ( $^1\text{H} - ^{13}\text{C}$  Coupled HSQC)

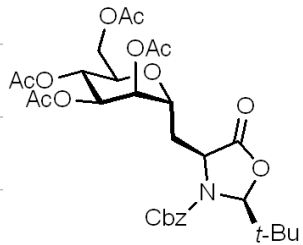

**191**

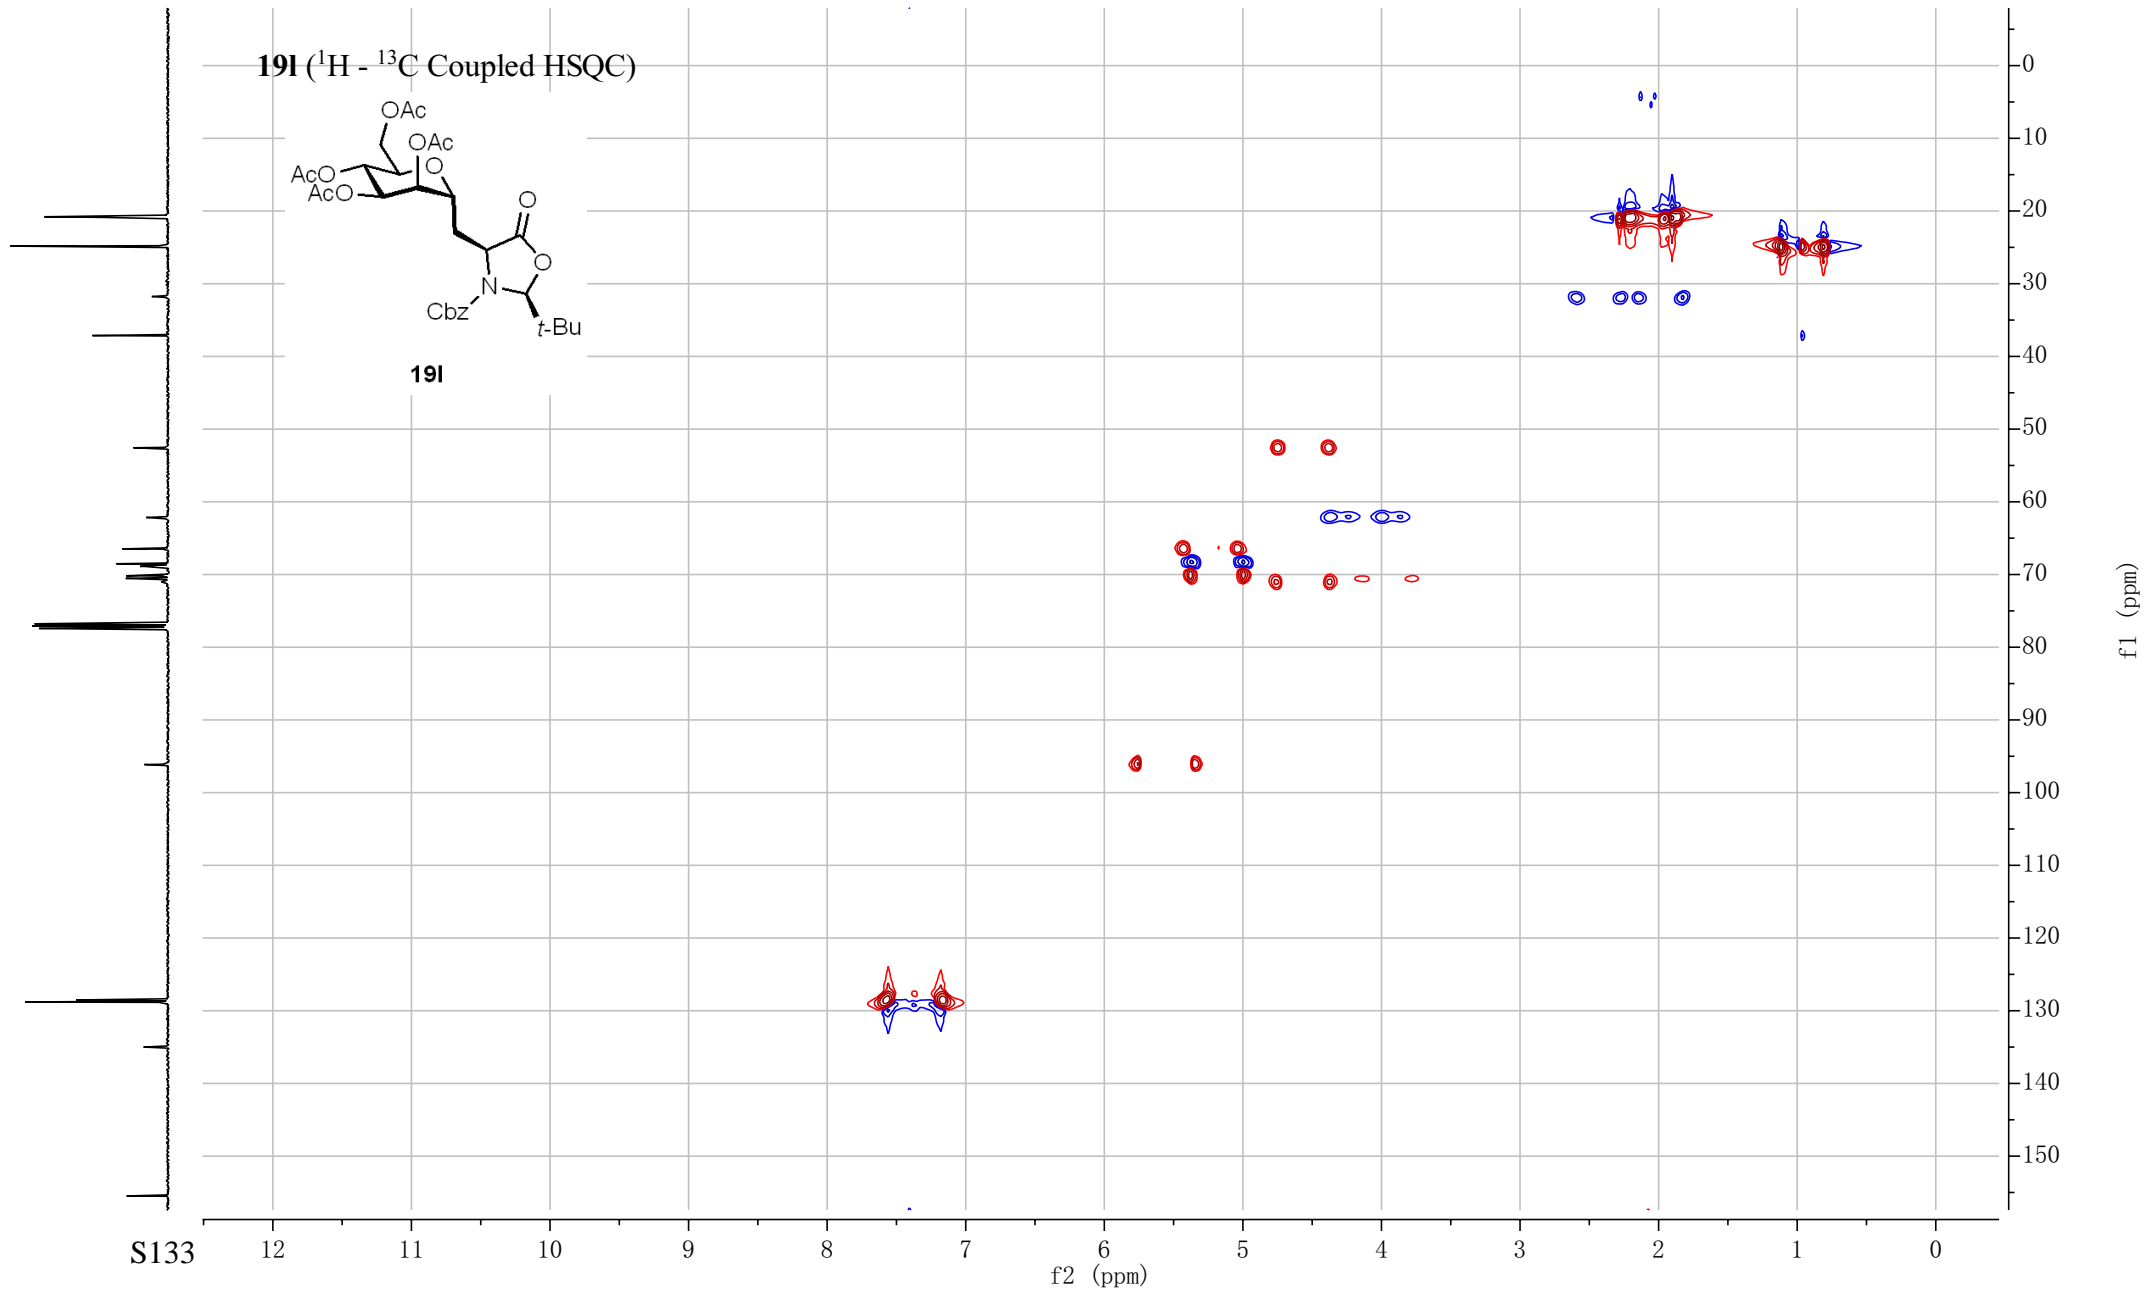

S133



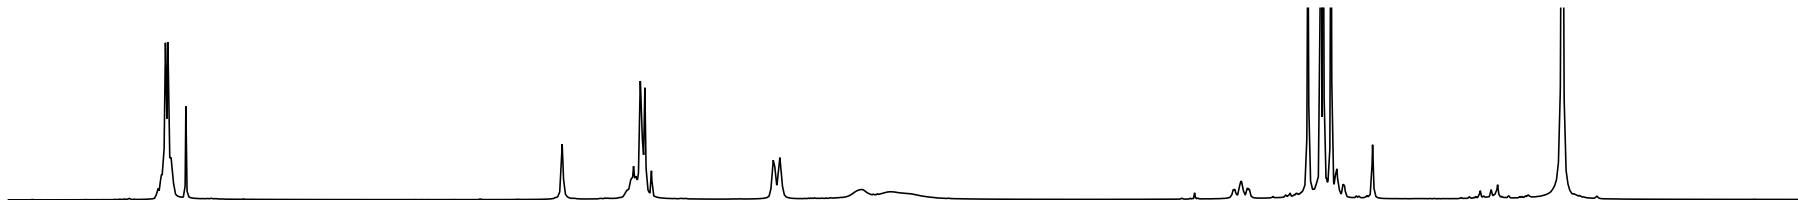

**19I** ( $^1\text{H} - ^{13}\text{C}$  HSQC)

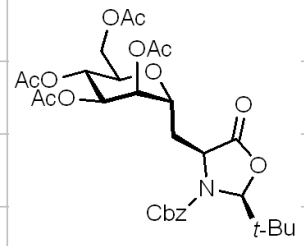

**19I**

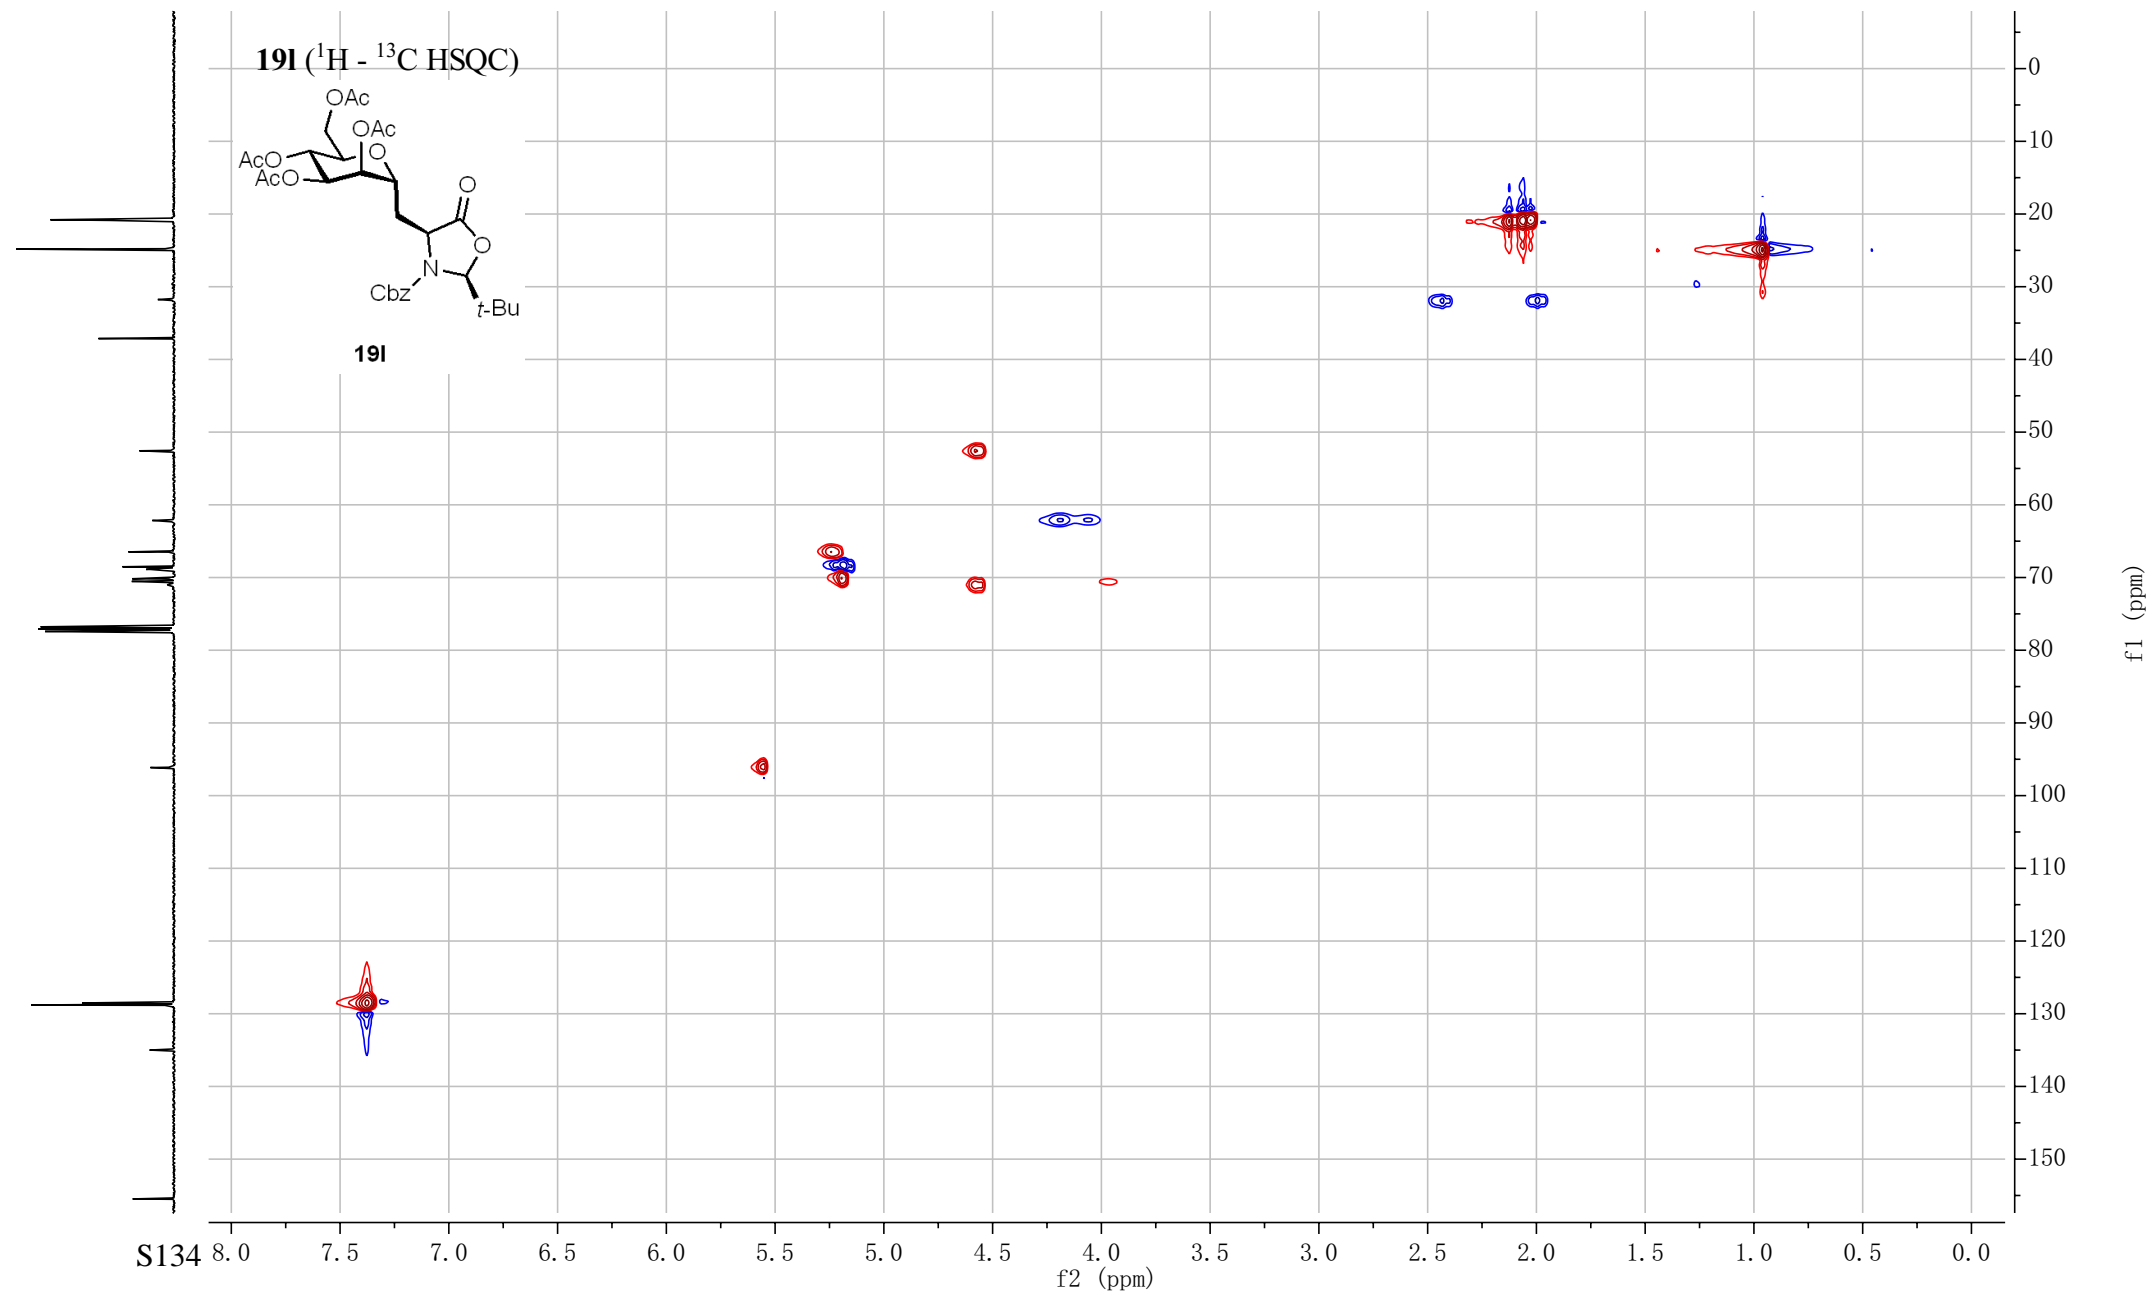

S134

f2 (ppm)

f1 (ppm)

7.40  
7.39  
7.38  
7.38  
7.37  
7.36  
7.36  
7.35  
7.34  
7.34  
5.96  
5.55  
5.18  
5.10  
5.08  
5.07  
5.07  
5.06  
5.05  
5.03

4.52  
4.51  
4.49  
4.49  
4.47  
4.46  
4.45  
4.45  
4.44  
4.43  
4.42  
4.41  
4.40  
4.39  
4.39  
2.49  
2.48  
2.08  
2.07  
2.06  
2.05  
2.04  
2.03  
2.02  
2.01  
2.00  
0.94  
0.92

**19m** (<sup>1</sup>H NMR, 400MHz, CDCl<sub>3</sub>)

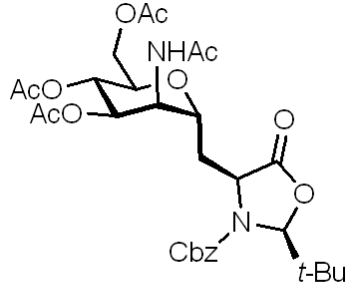

**19m**

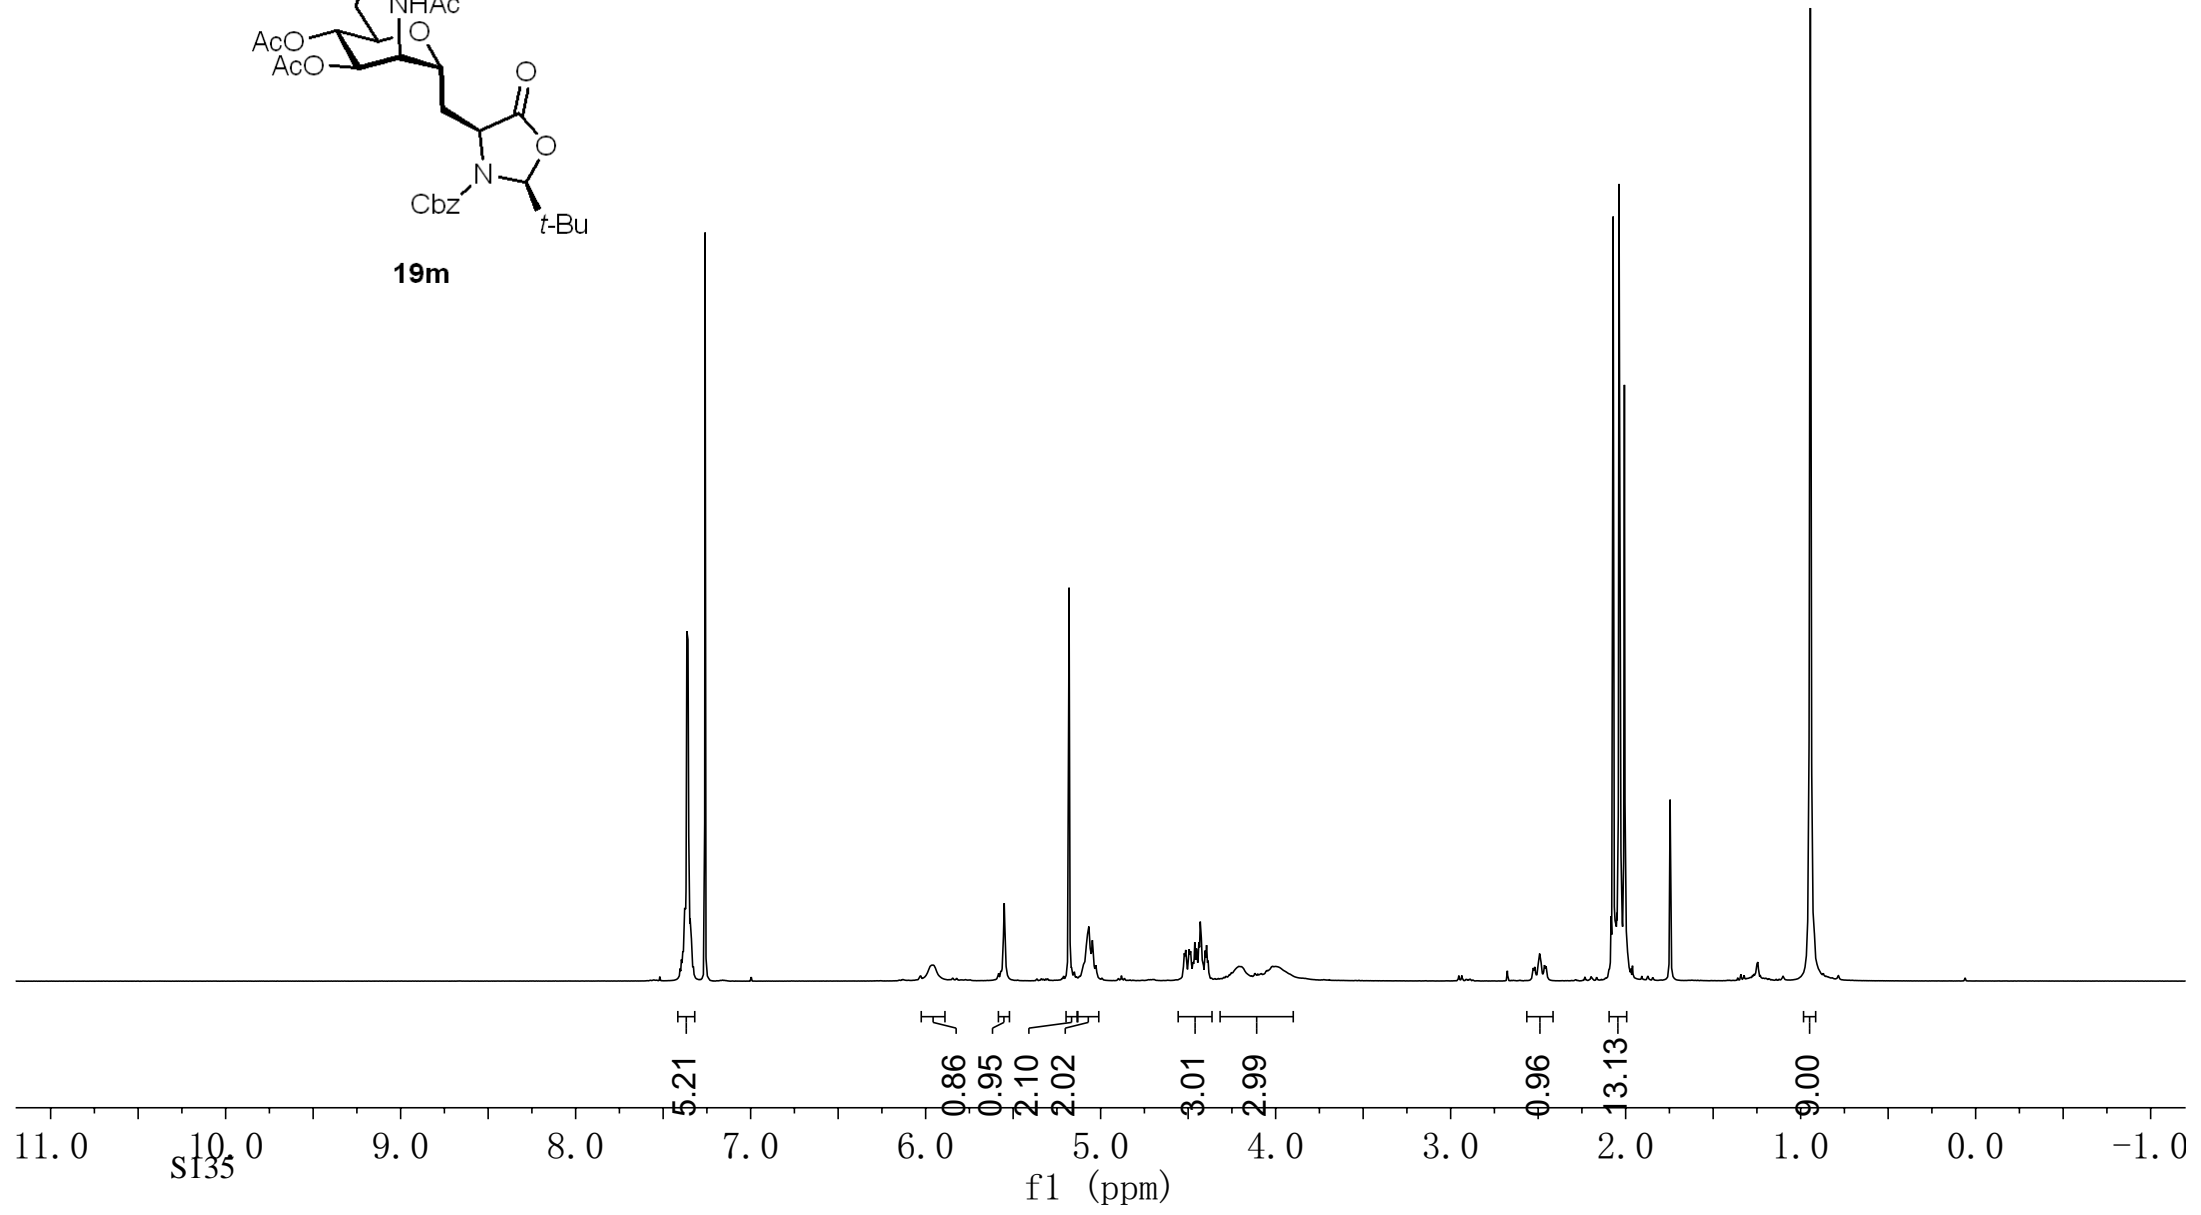

SI35

172.03  
170.72  
170.32  
170.01  
169.77  
— 155.64

135.10  
128.89  
128.54

— 96.38

77.16  
71.29  
70.73  
69.66  
68.63  
66.41  
61.97  
— 52.93  
— 49.26

— 37.25  
— 32.97  
24.93  
24.84  
23.45  
20.99  
20.97  
20.91

**19m** ( $^{13}\text{C}$  NMR, 101MHz,  $\text{CDCl}_3$ )

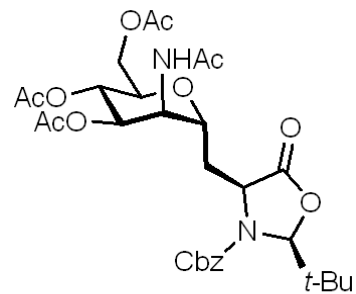

**19m**

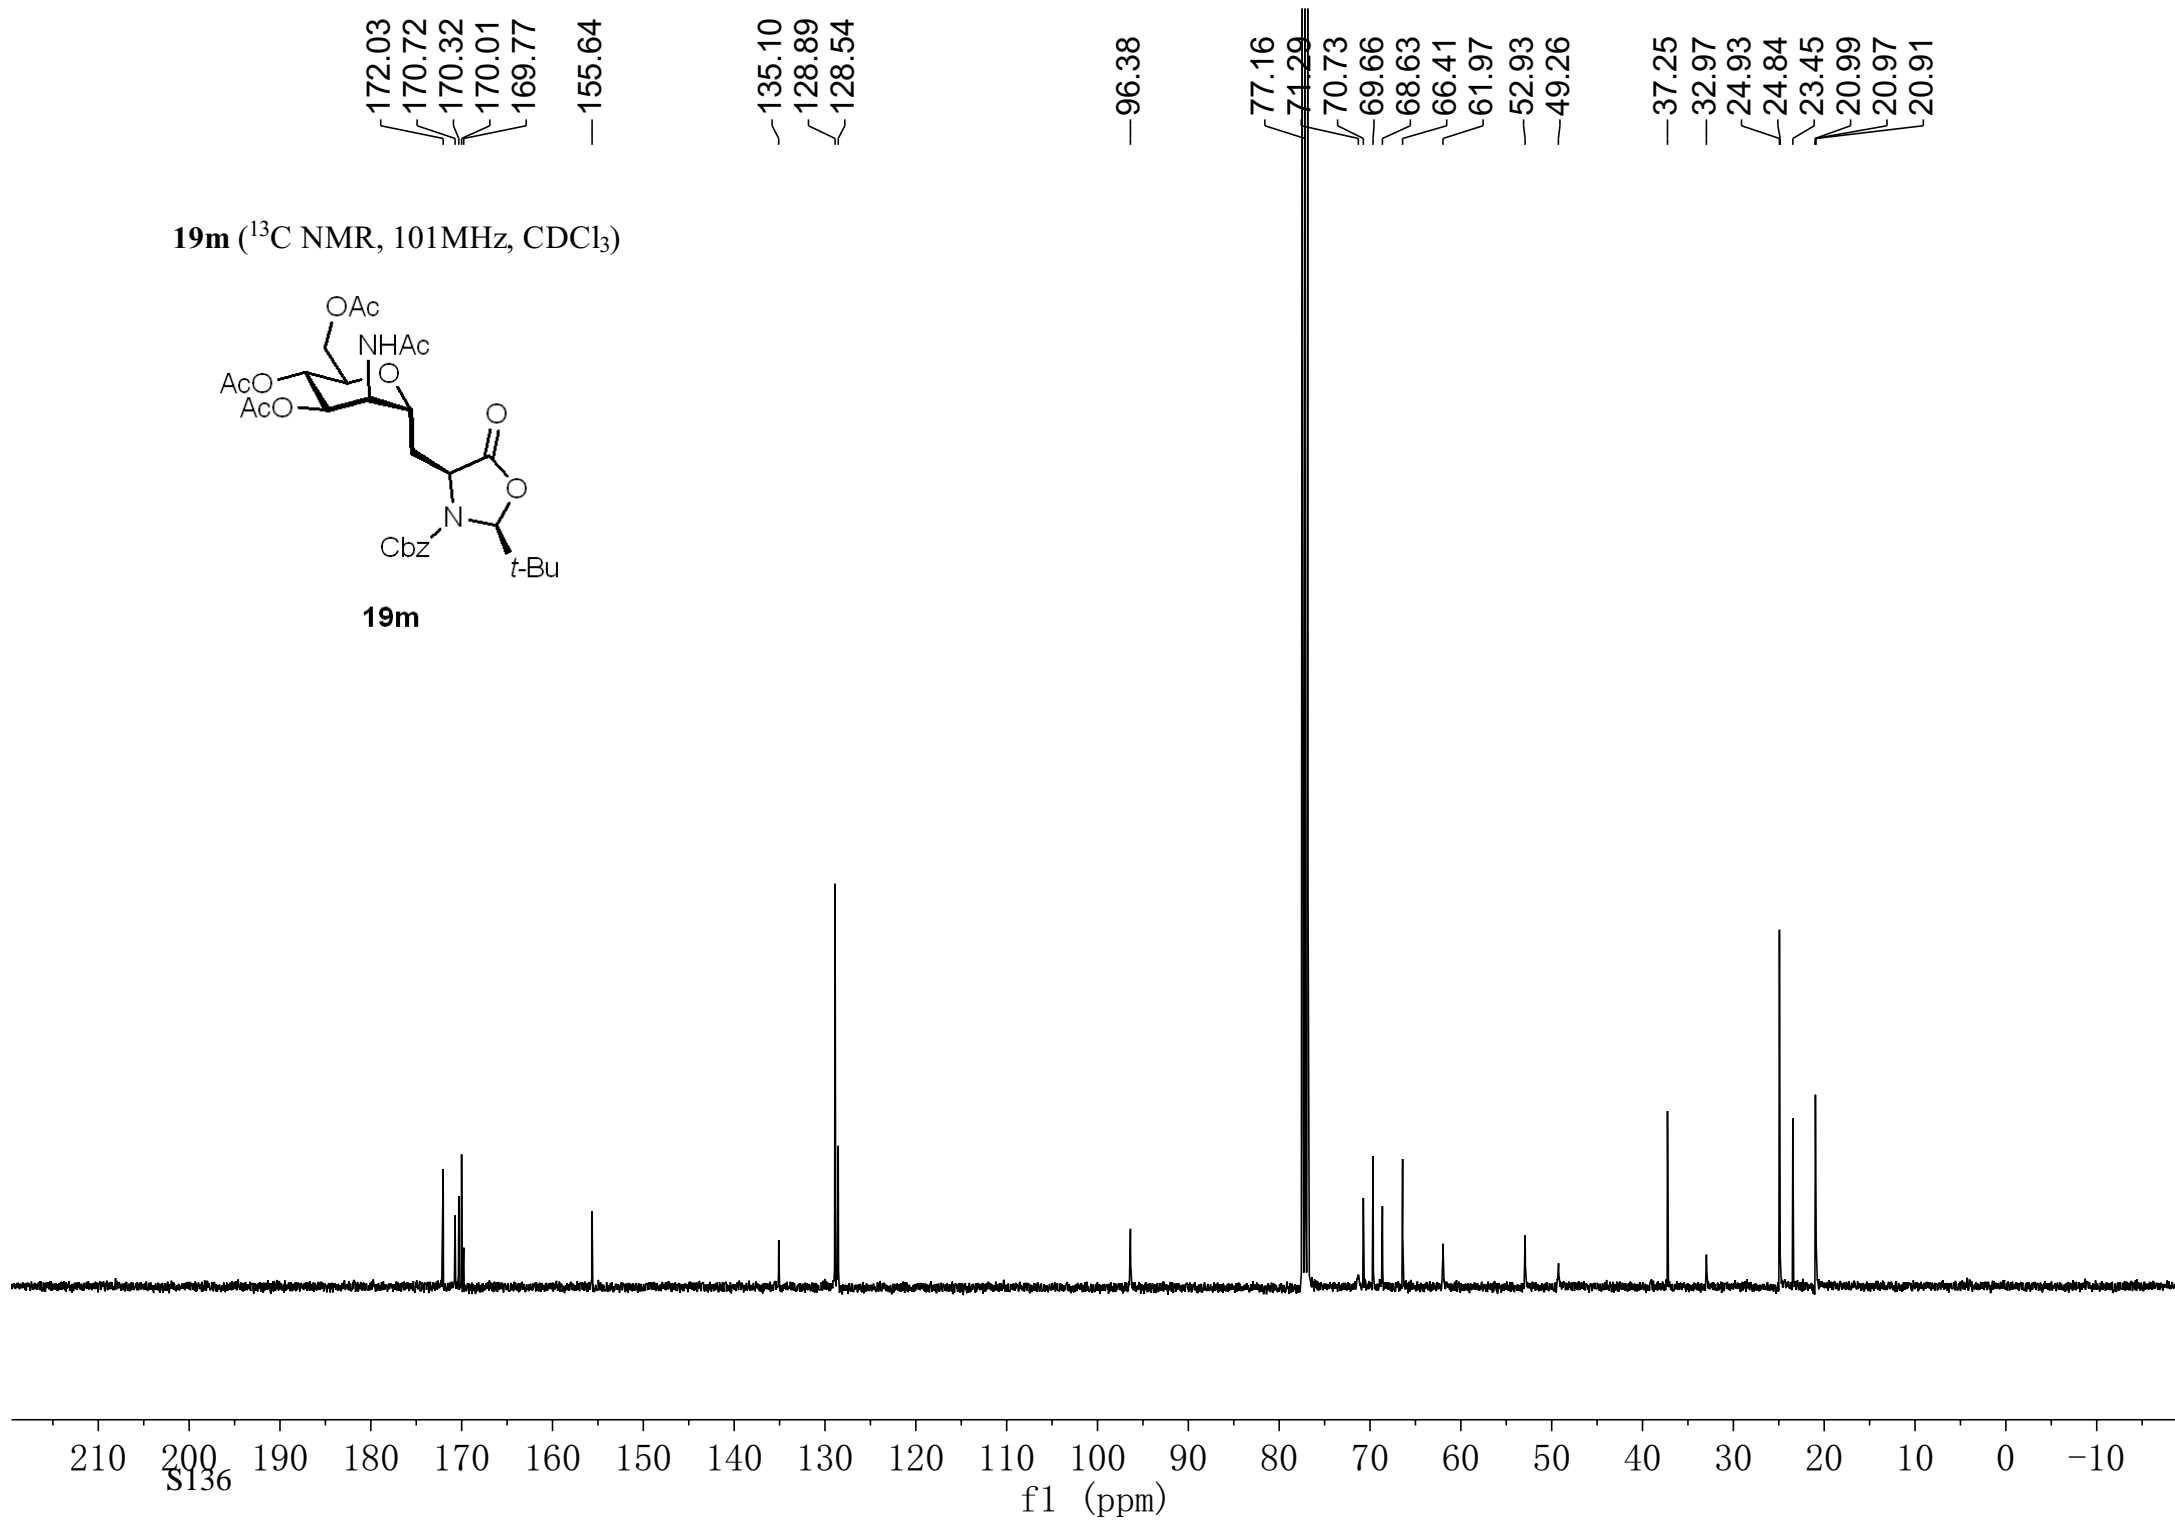

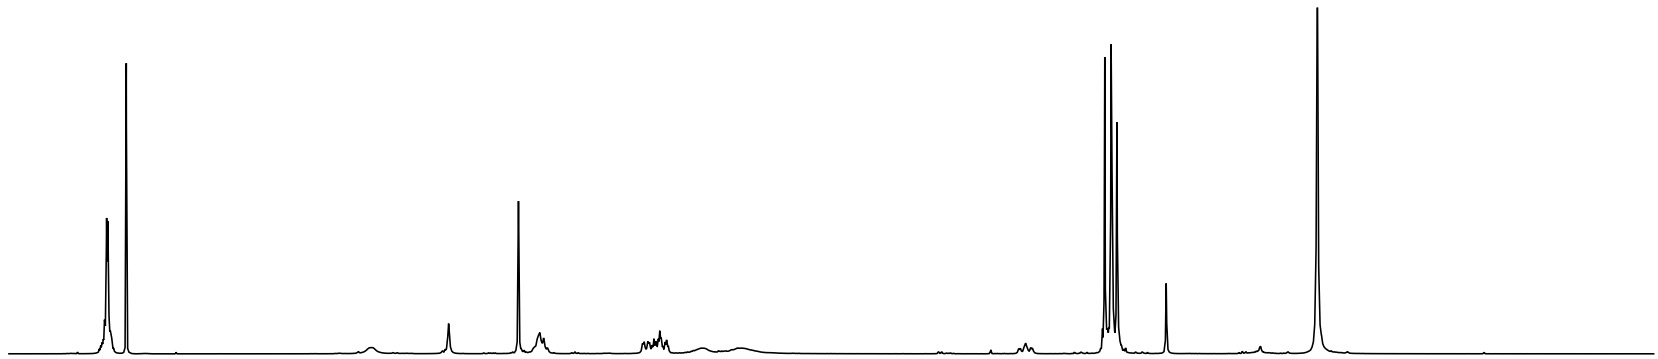

**19m** ( $^1\text{H}$ - $^1\text{H}$  COSY)

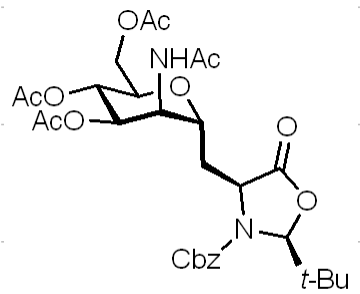

**19m**

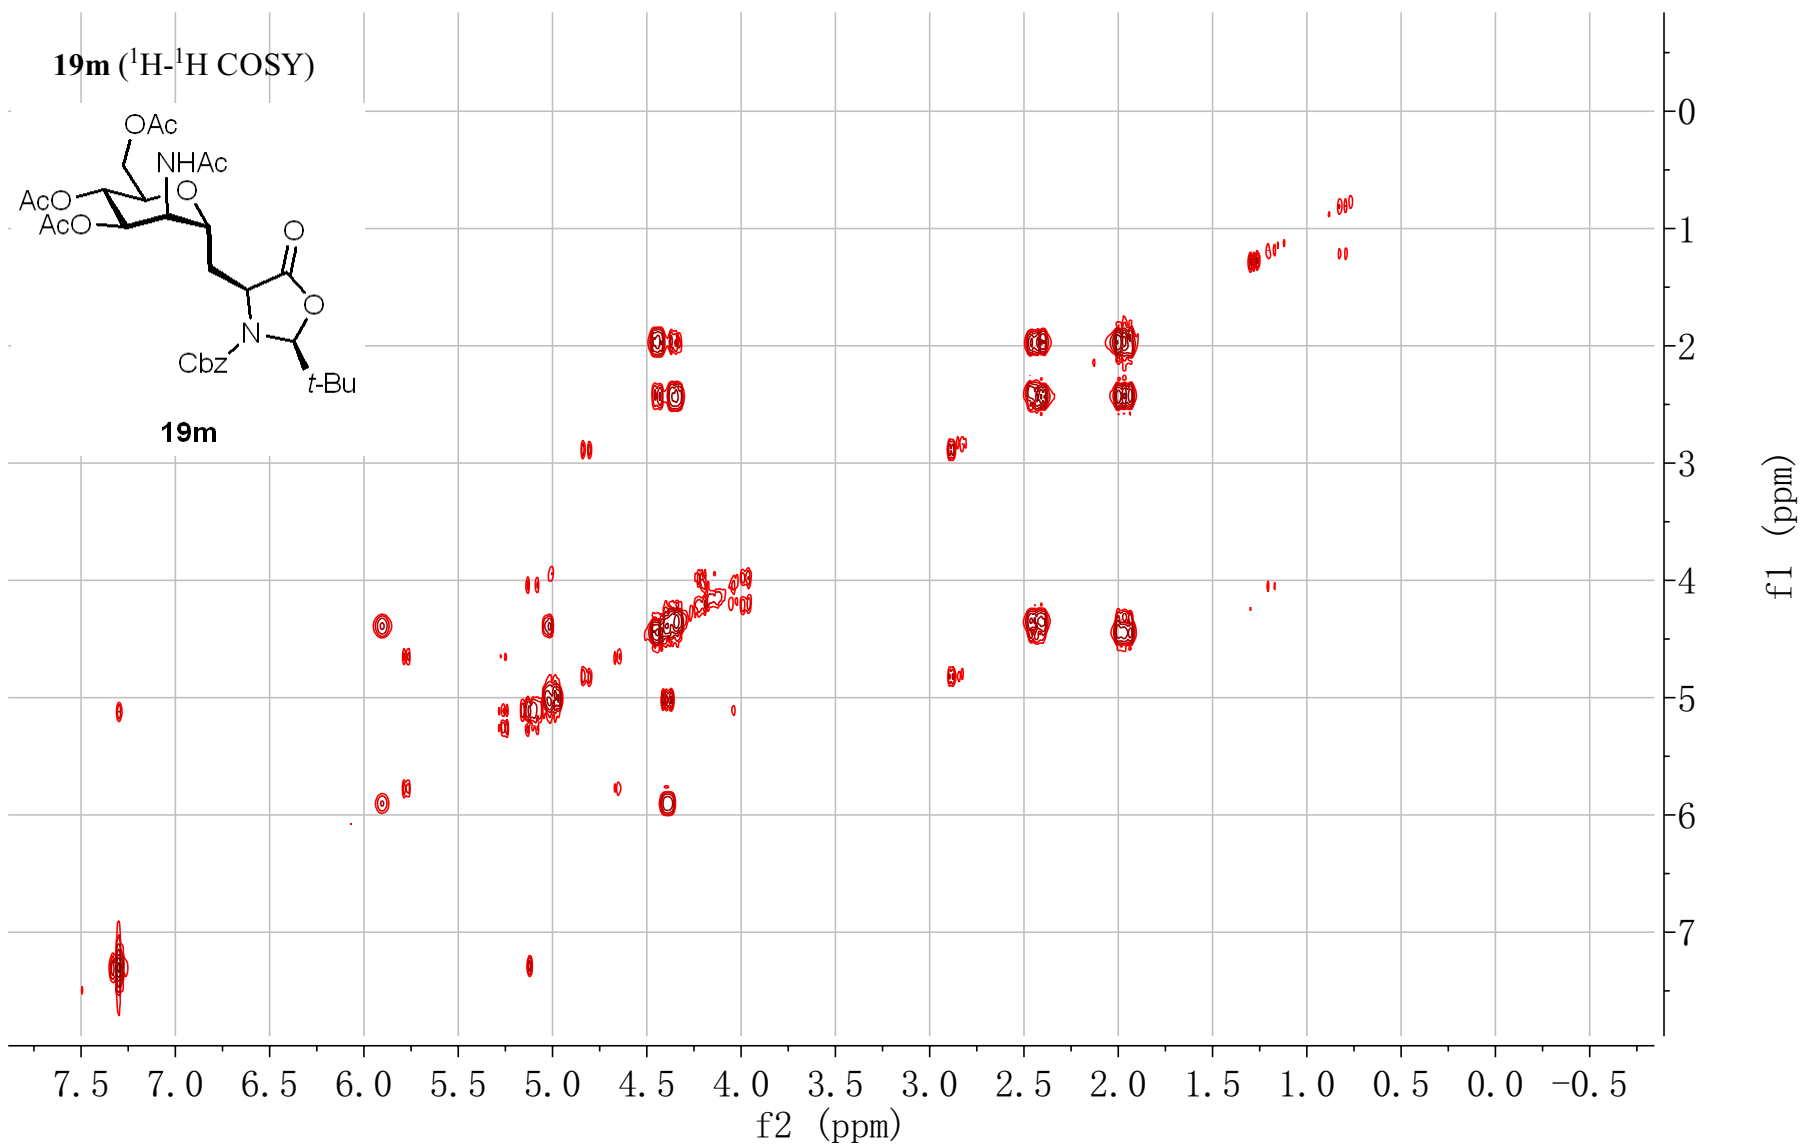

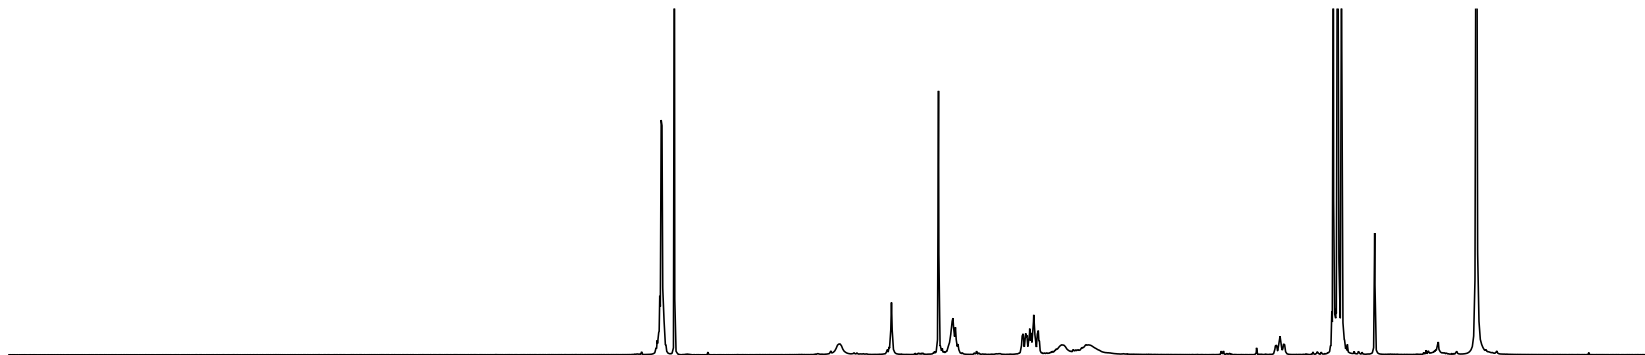

**19m** ( $^1\text{H}$ - $^{13}\text{C}$  Coupled HSQC)

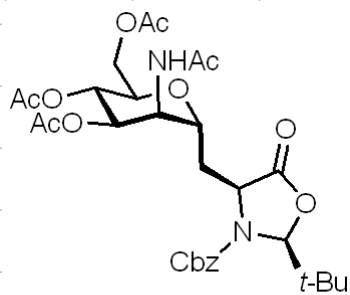

**19m**

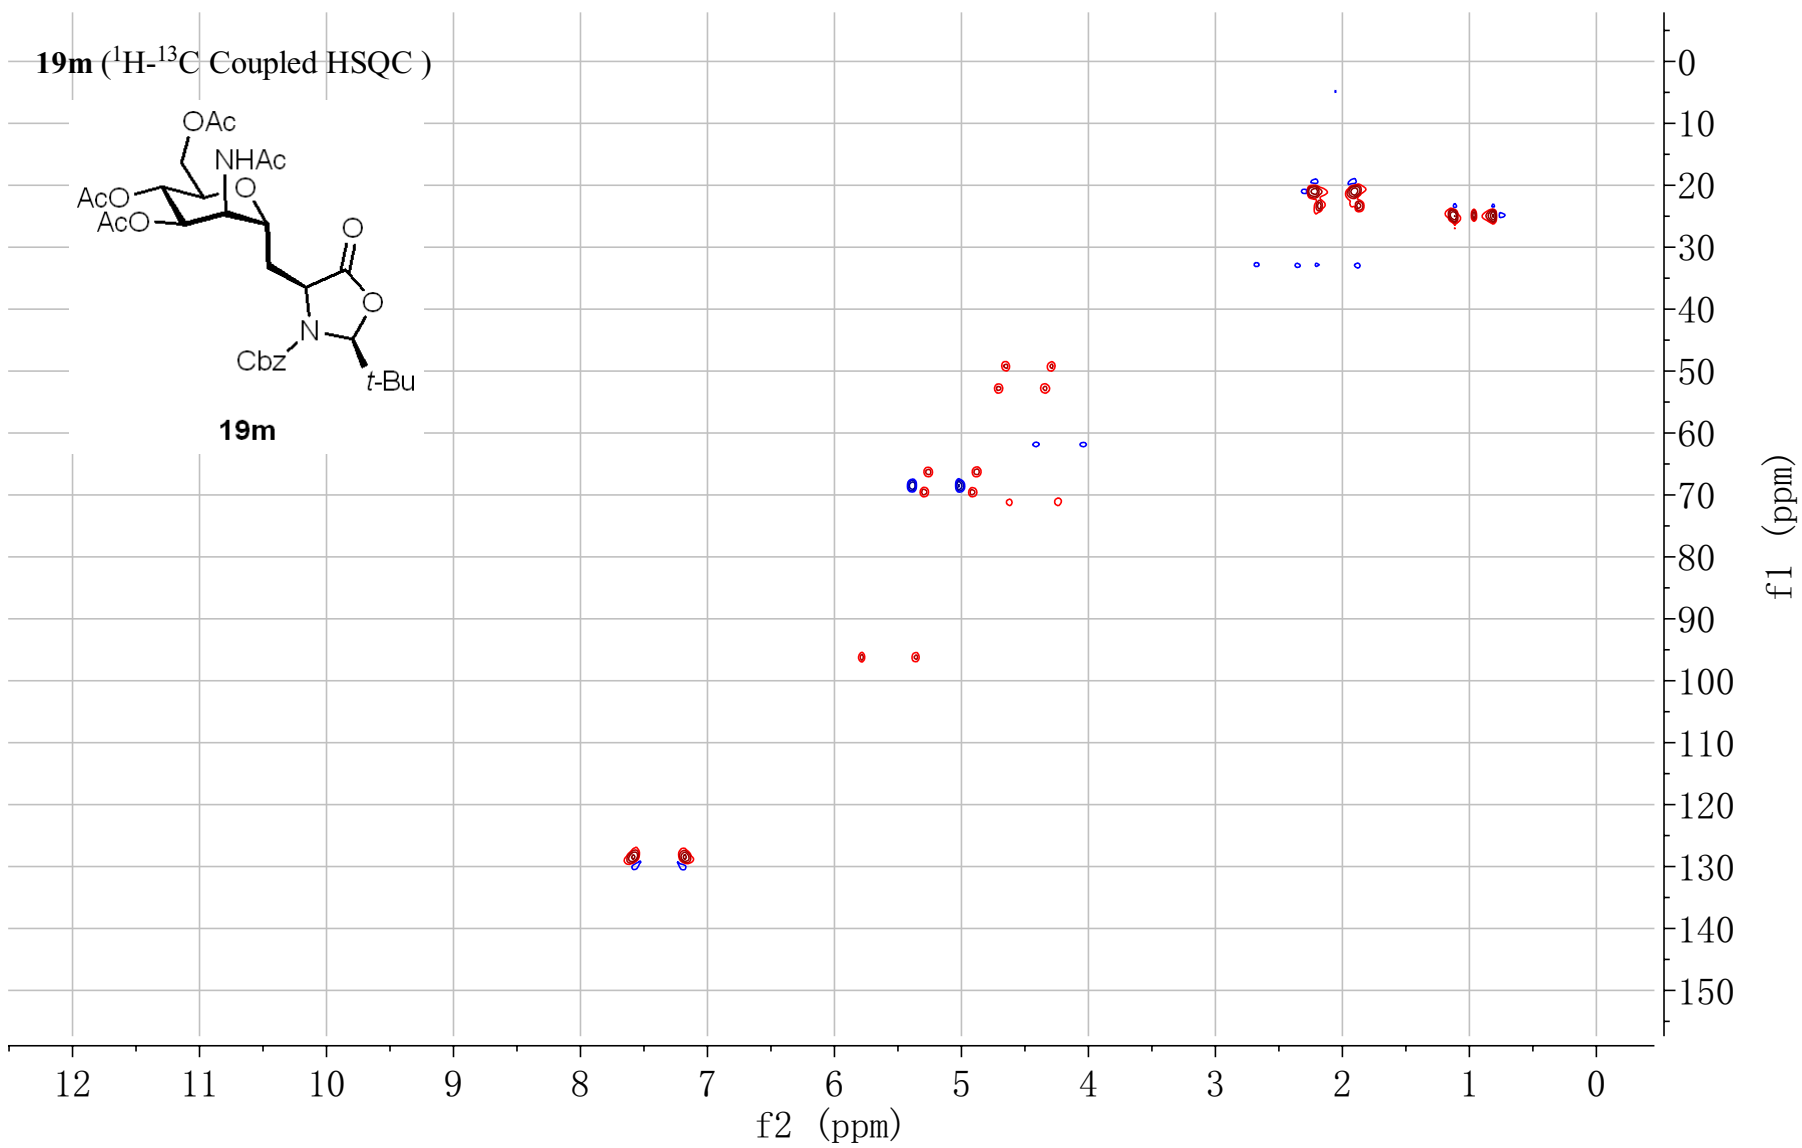

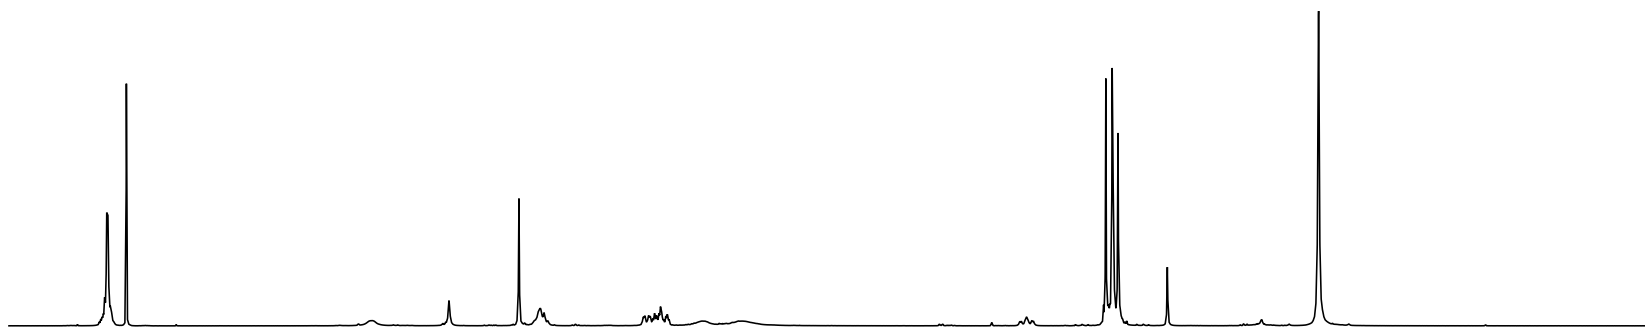

**19m** ( $^1\text{H}$ - $^{13}\text{C}$  HSQC)

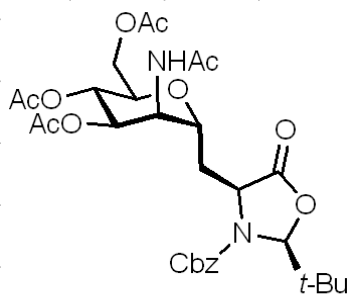

**19m**

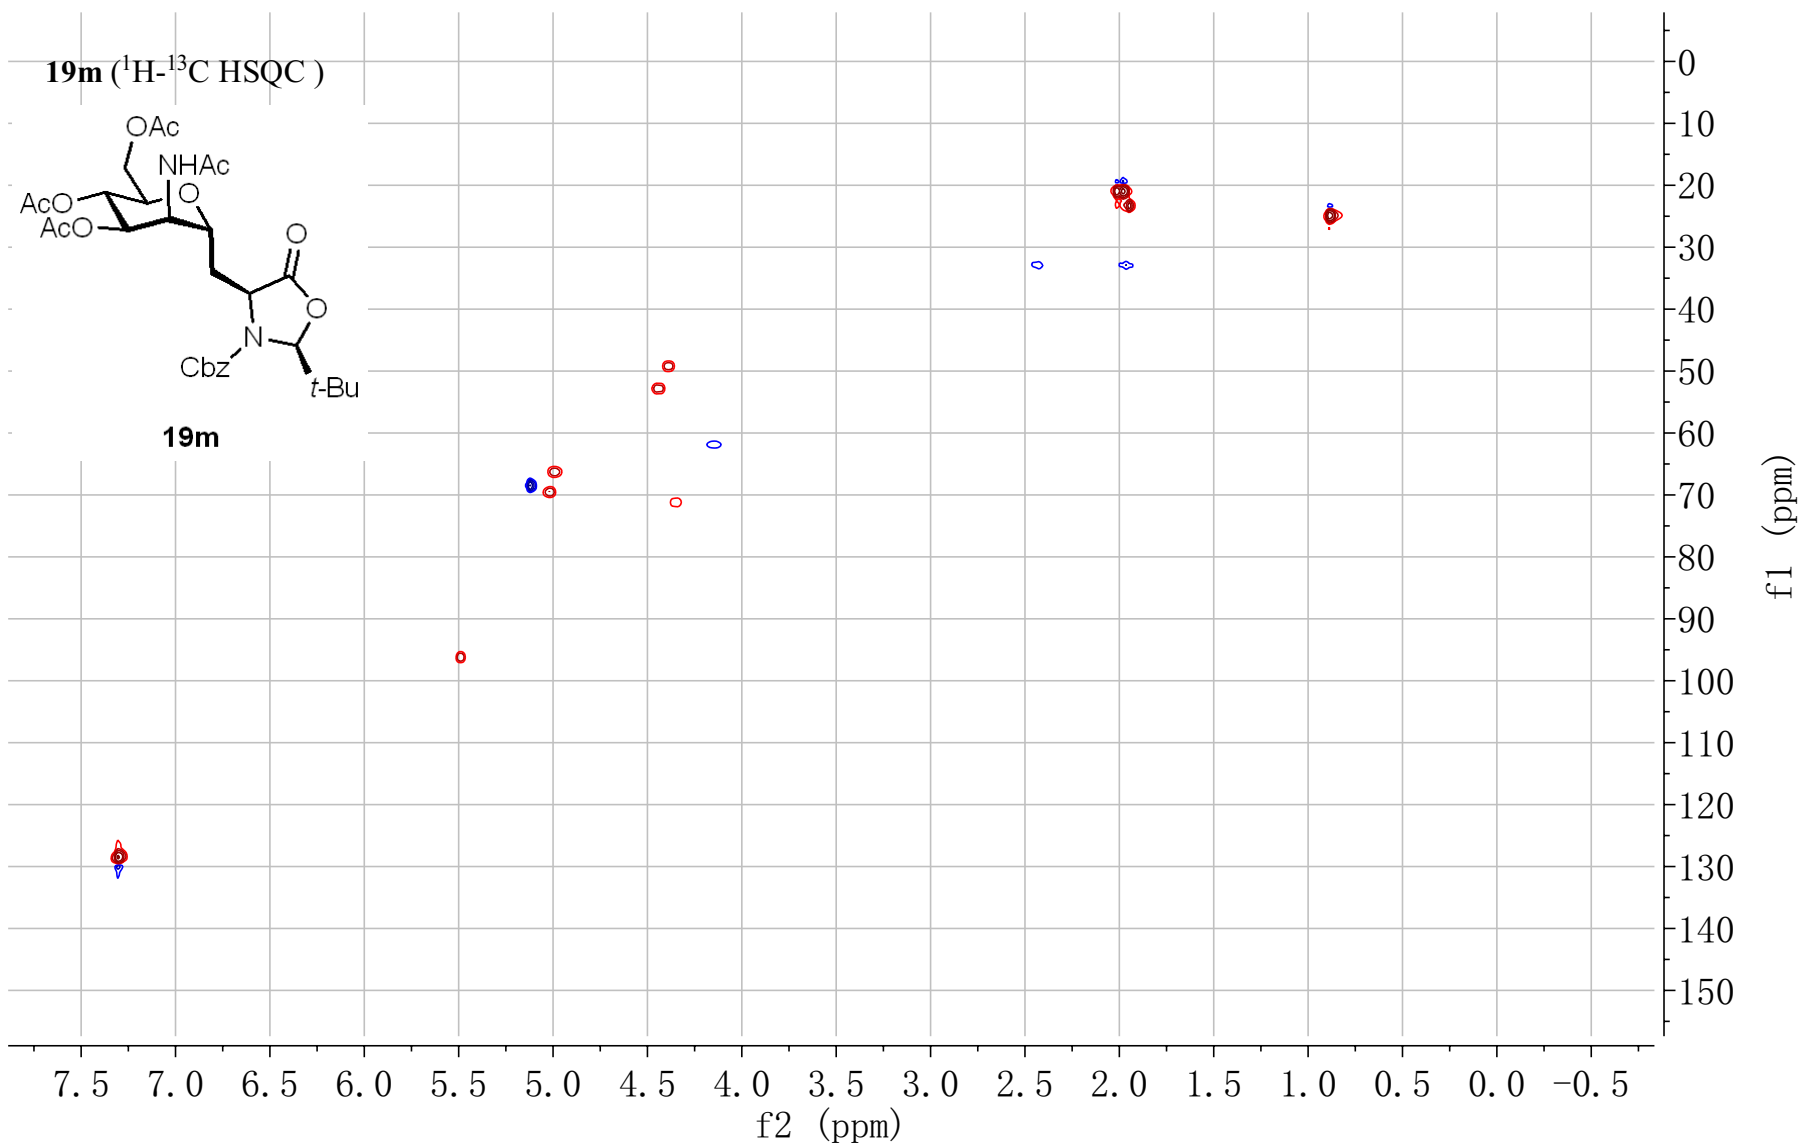

7.36  
7.35  
7.33  
7.32  
7.31  
7.31  
7.30  
7.28  
7.28  
7.27  
7.27  
7.25  
7.24  
5.57  
5.50  
5.18  
5.15  
5.04  
5.01  
4.83  
4.80  
4.74  
4.74  
4.72  
4.72  
4.69  
4.69  
4.65  
4.62  
4.58  
4.55  
4.54  
4.53  
4.51  
4.50  
4.48  
4.44  
4.41  
4.00  
3.79  
3.71  
3.69  
3.67  
3.58  
3.57  
3.56  
3.50  
2.30  
2.29  
2.27  
2.27  
2.26  
2.24  
2.23  
2.07  
2.06  
2.03  
0.94  
0.89

**19n** (<sup>1</sup>H NMR, 400MHz, CDCl<sub>3</sub>)

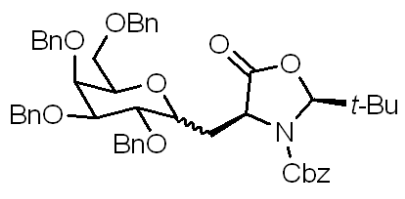

**19n, major  $\alpha$**

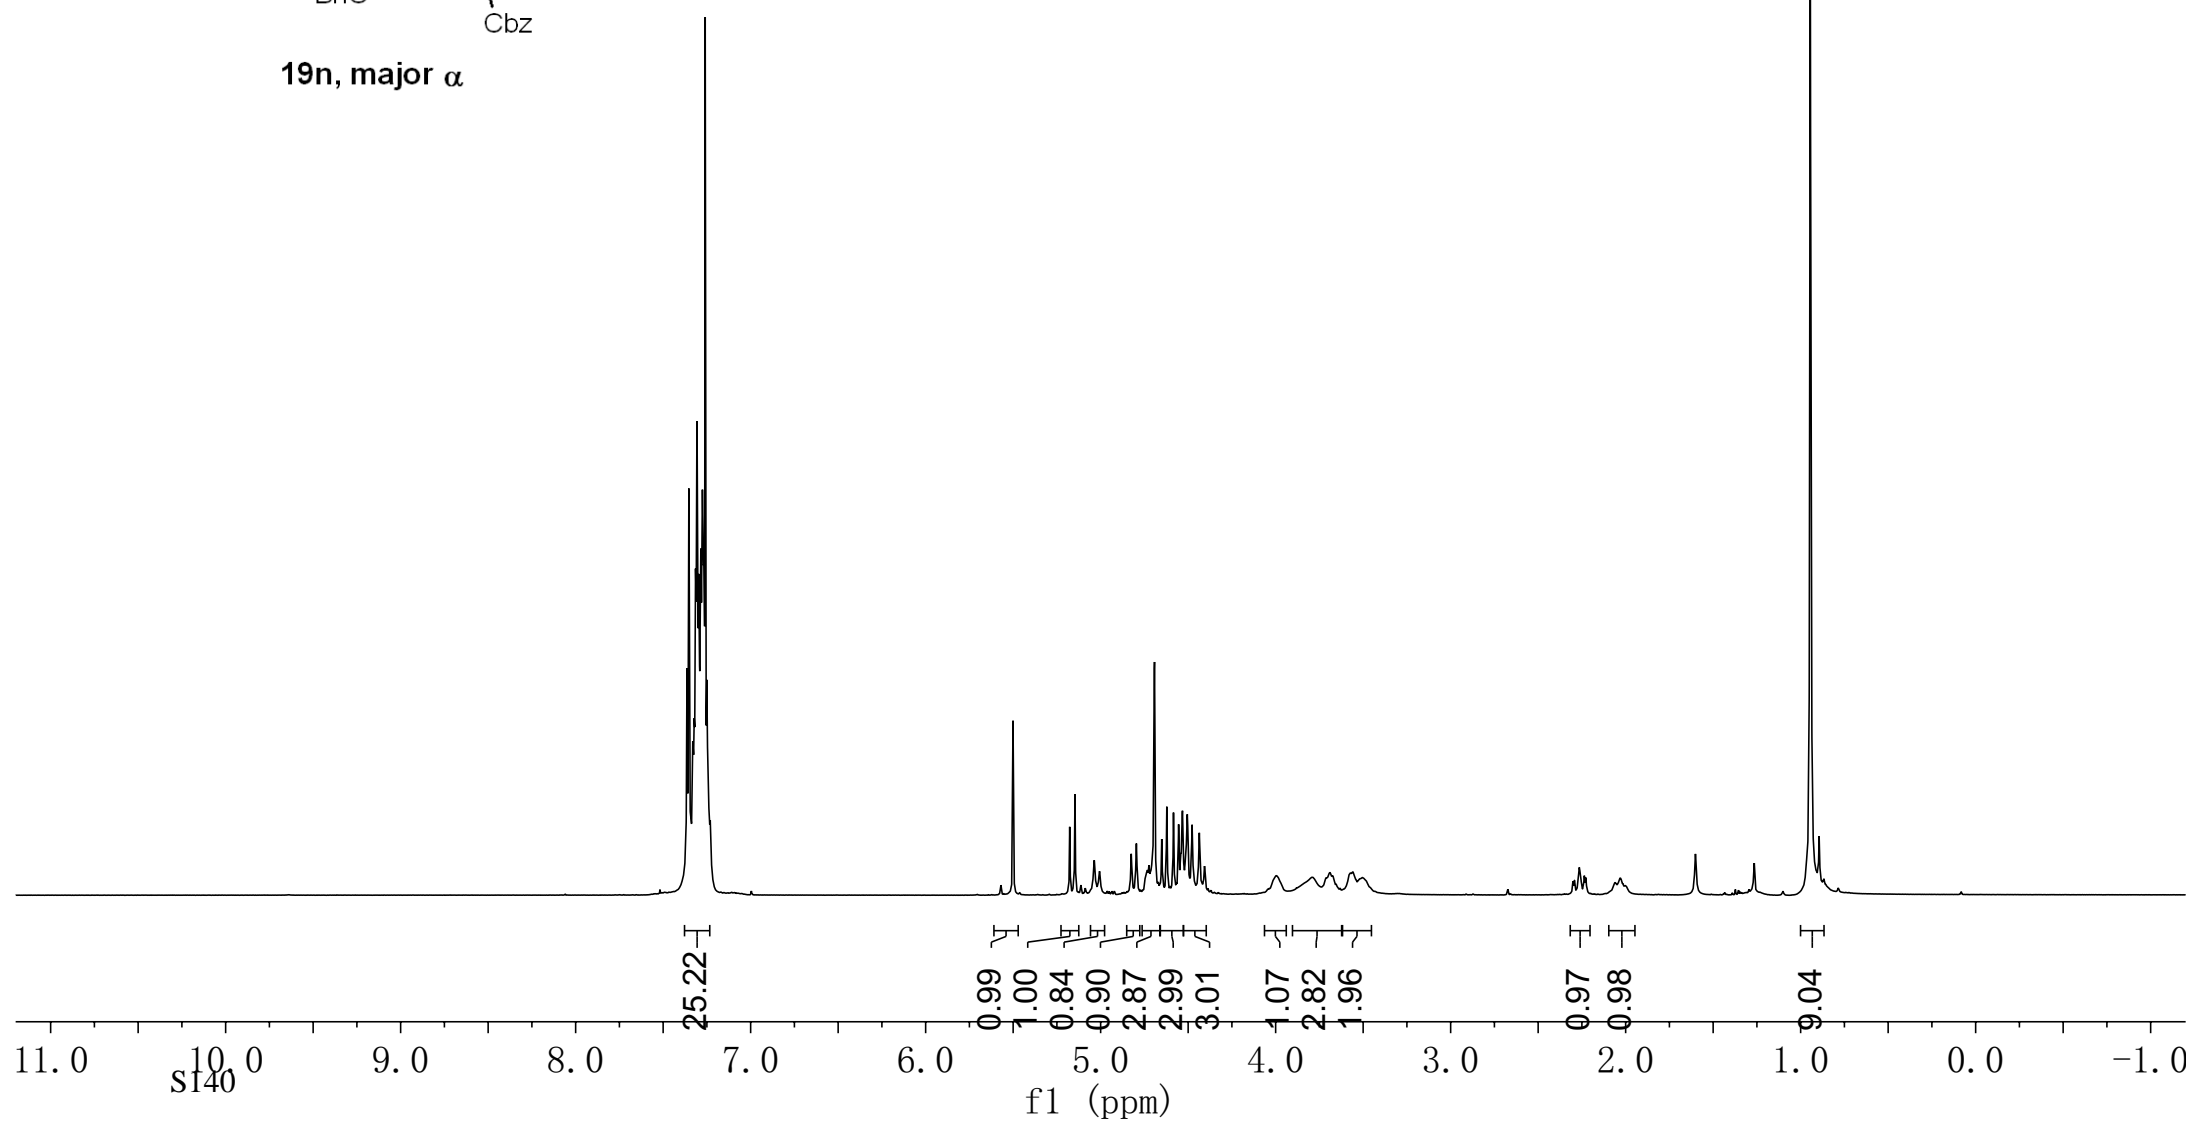

SI40

**19n** ( $^{13}\text{C}$  NMR, 101MHz,  $\text{CDCl}_3$ )

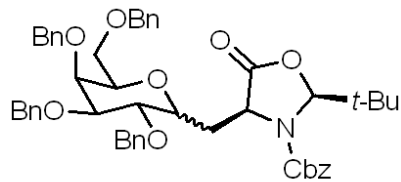

**19n**, major  $\alpha$

172.41  
155.62  
138.81  
138.66  
138.55  
138.27  
135.68  
128.70  
128.58  
128.54  
128.50  
128.49  
128.43  
128.39  
128.18  
128.08  
128.04  
127.85  
127.78  
127.72  
127.66  
127.64  
127.51  
95.89  
77.16  
76.27  
74.39  
73.82  
73.50  
73.09  
73.05  
68.82  
68.36  
68.14  
53.25  
51.40  
37.35  
29.84  
24.95

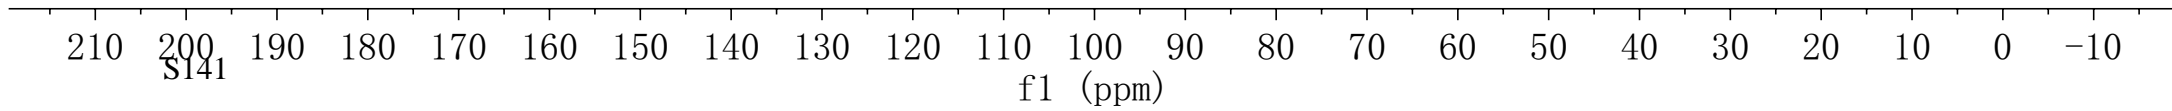



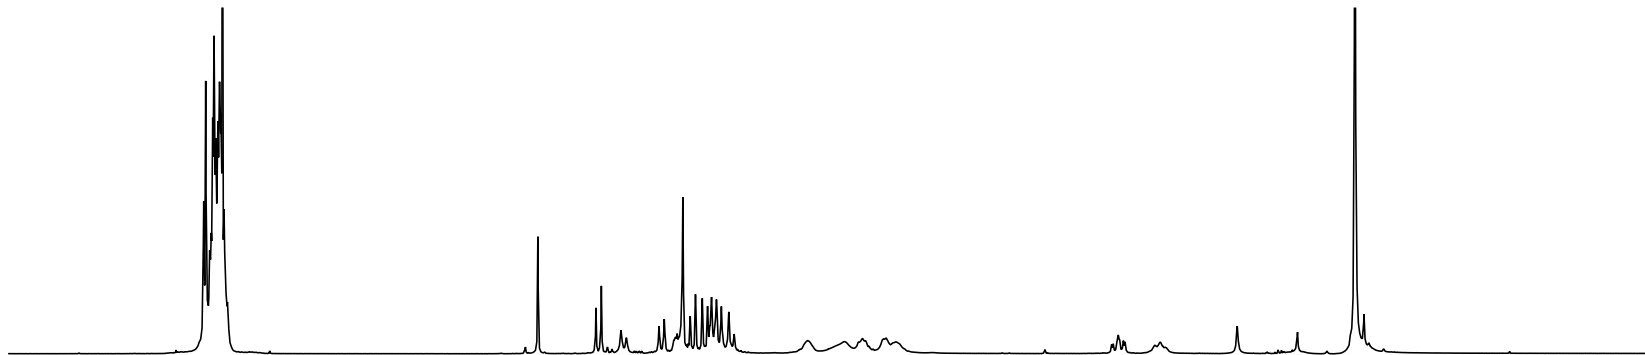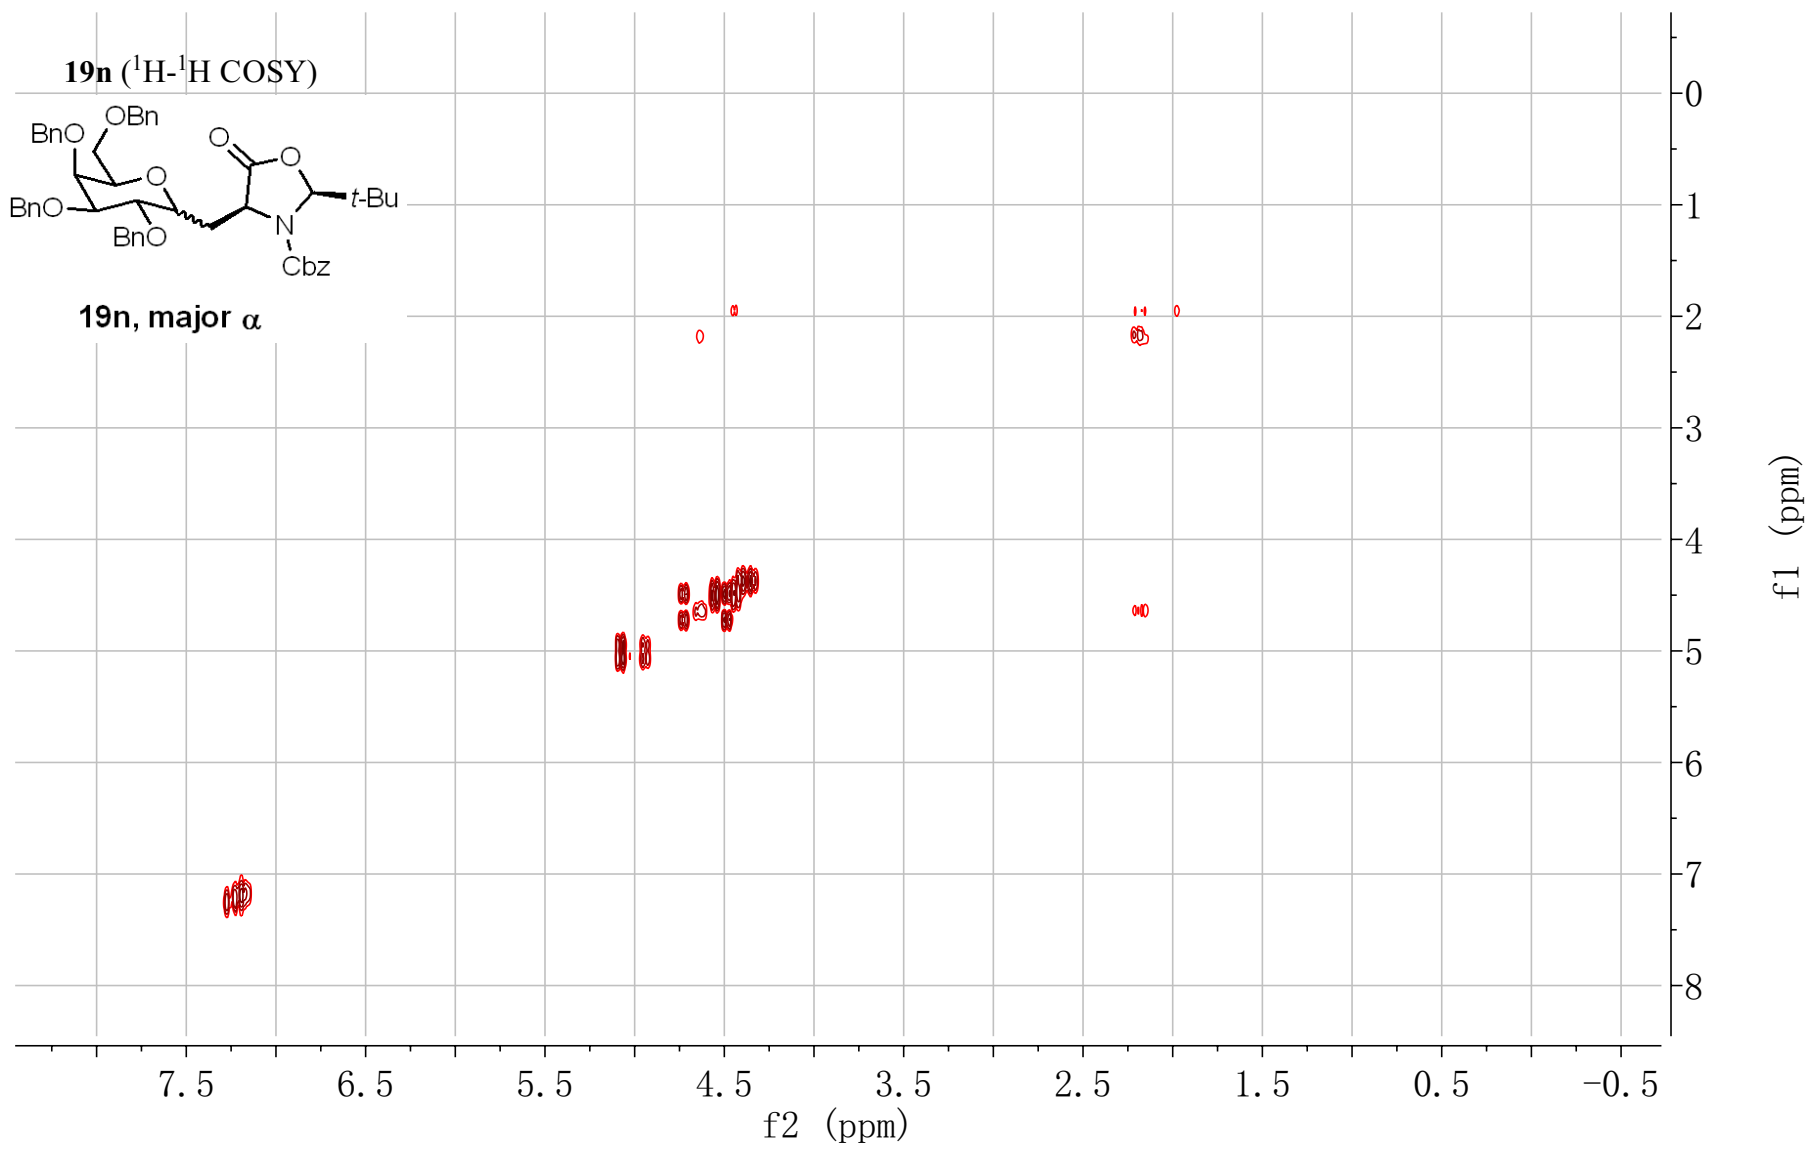

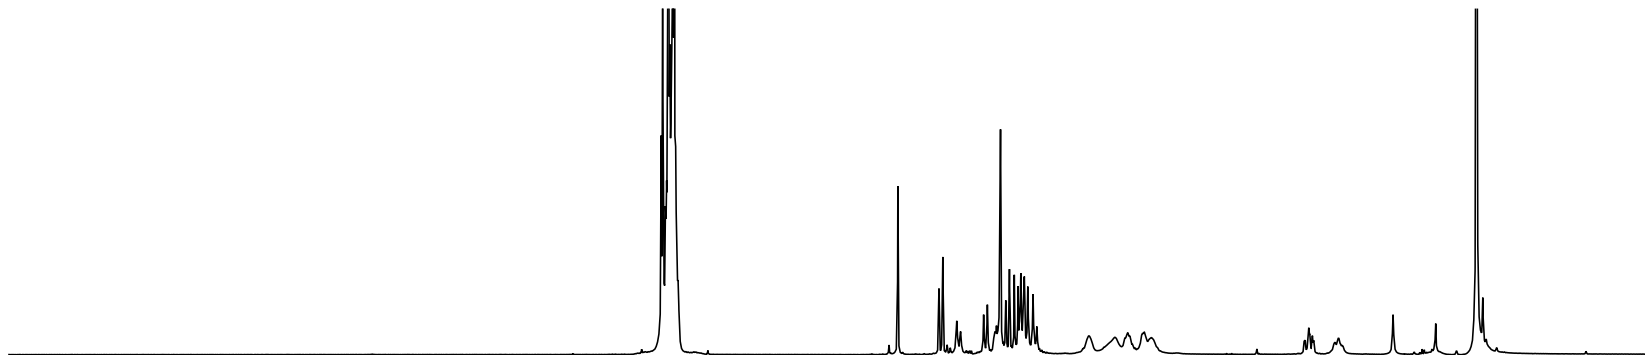

19n (<sup>1</sup>H-<sup>13</sup>C Coupled HSQC)

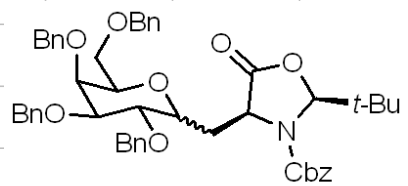

19n, major  $\alpha$

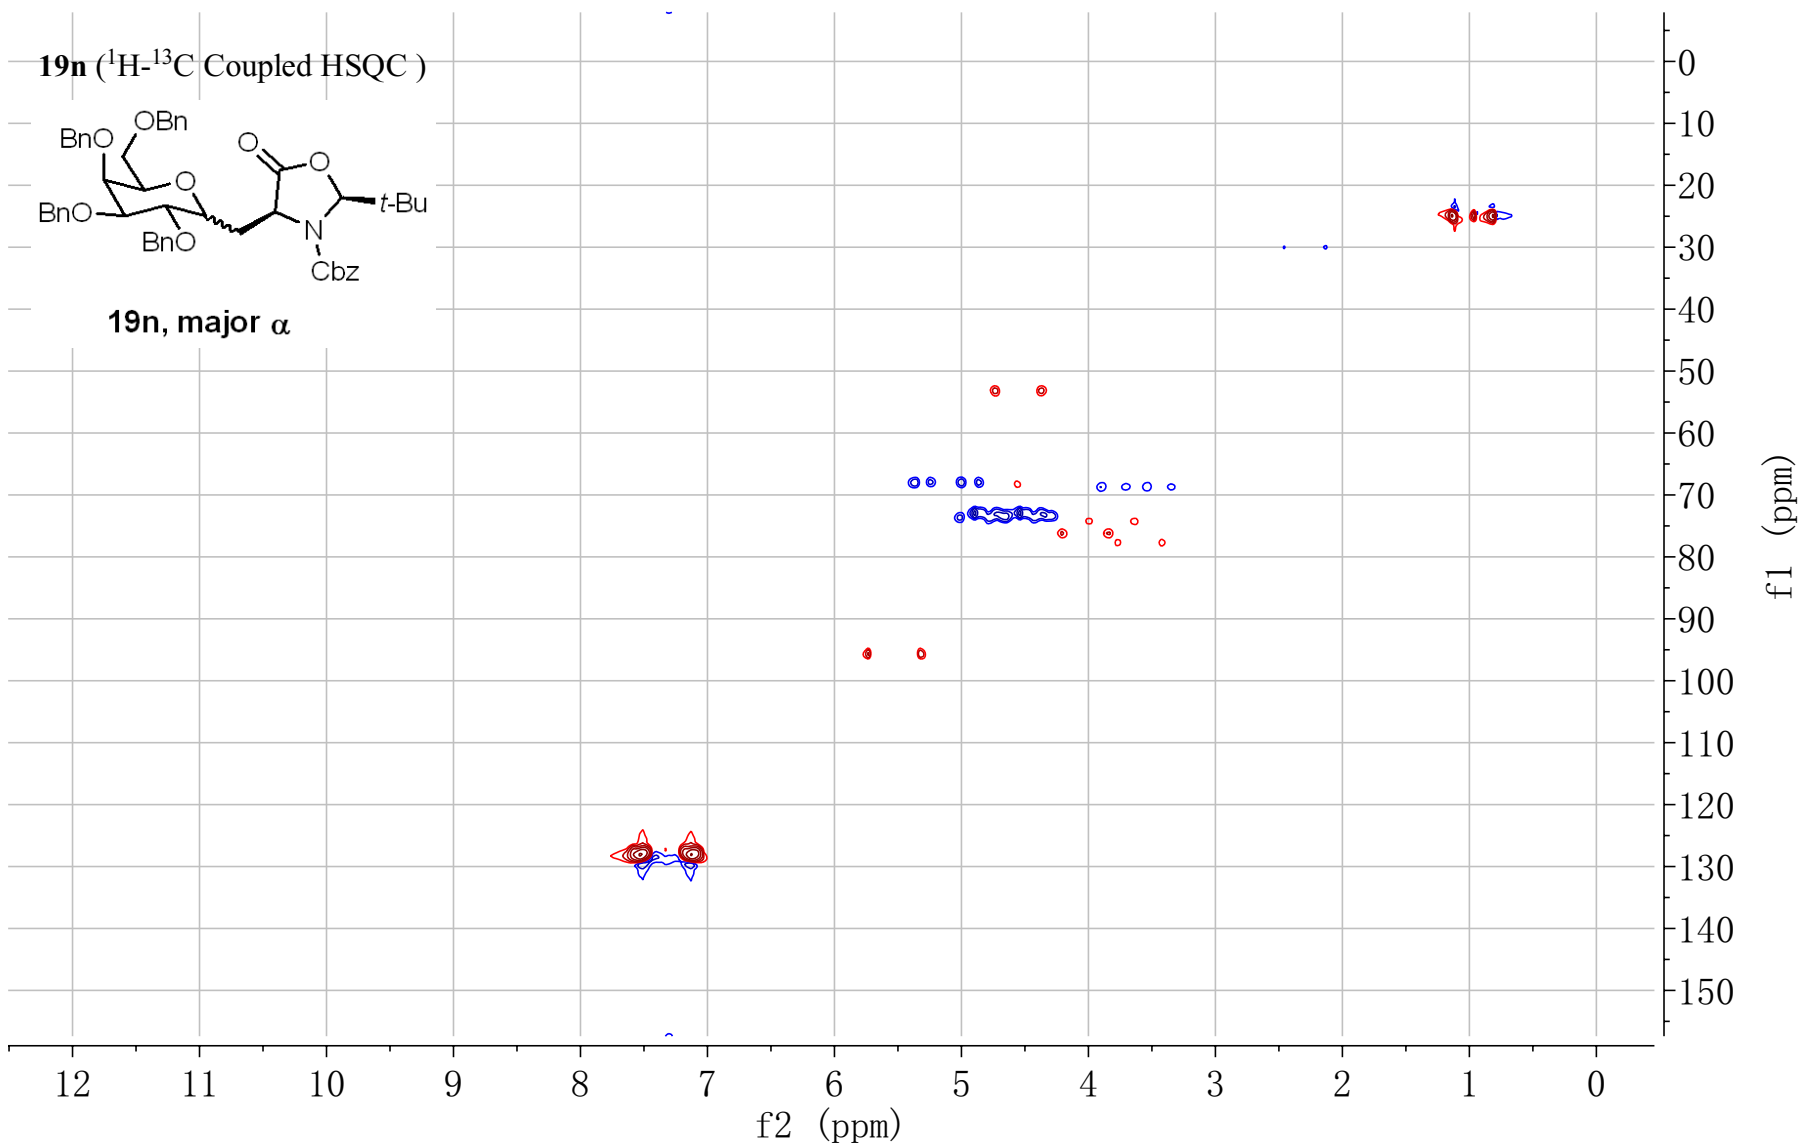

S143

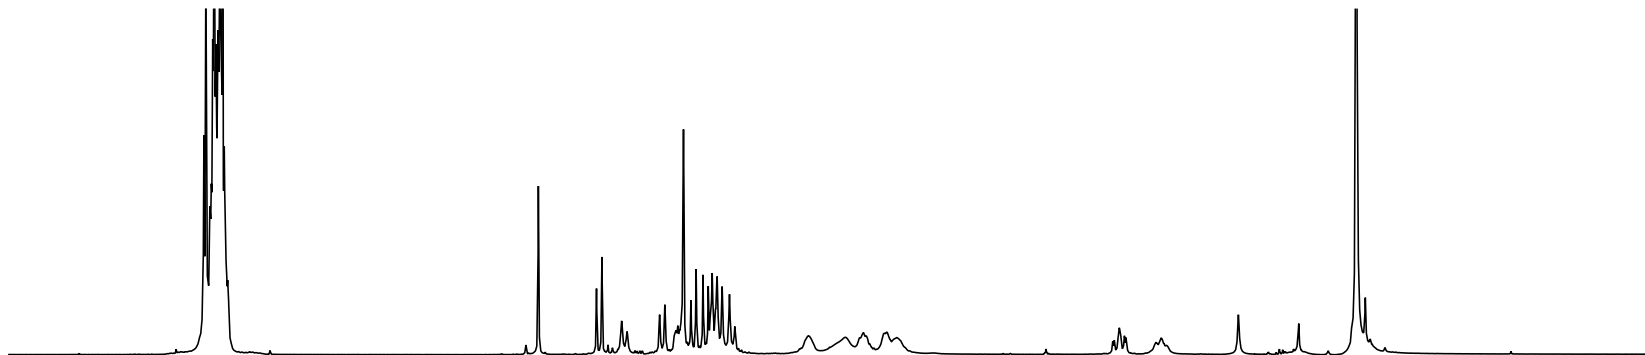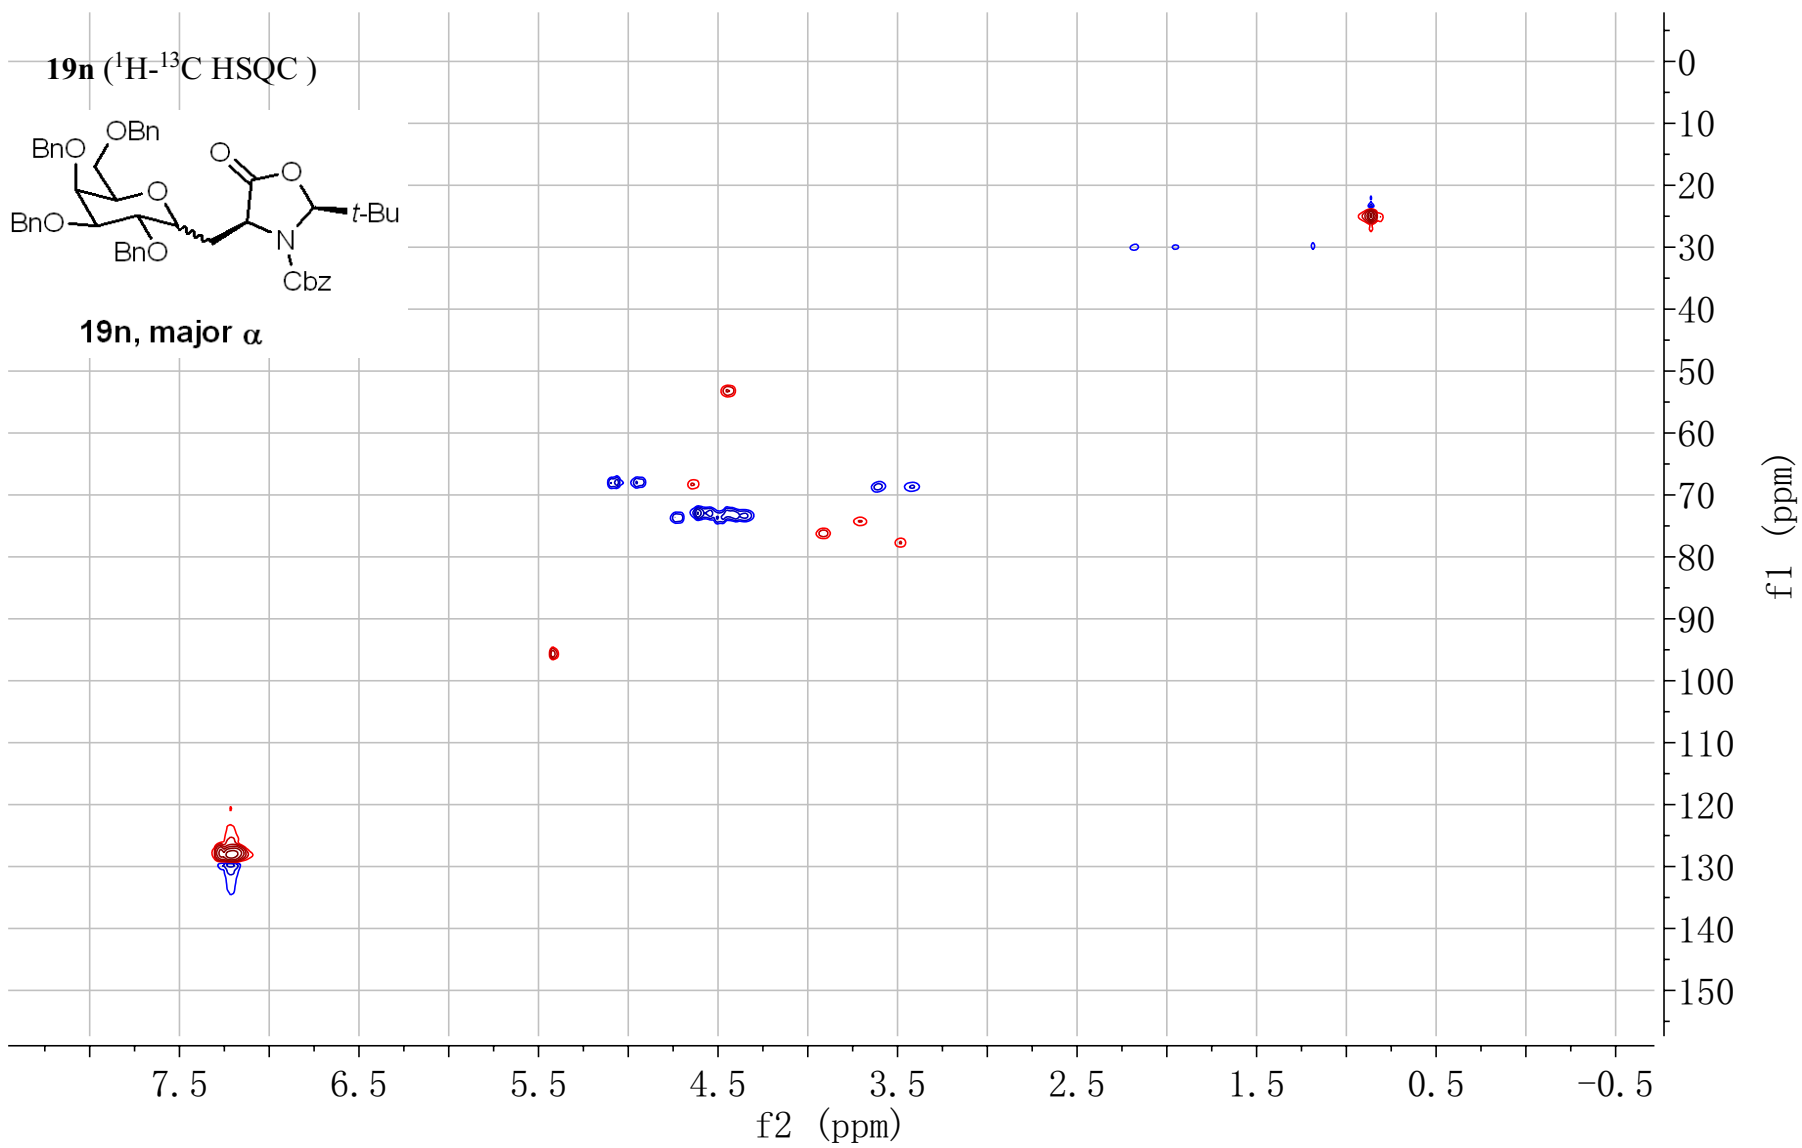

7.35  
7.34  
7.33  
7.32  
7.30  
7.29  
7.29  
7.27  
7.18  
7.18  
7.17  
7.16  
5.60  
5.56  
5.17  
5.14  
4.95  
4.93  
4.91  
4.85  
4.83  
4.80  
4.77  
4.64  
4.62  
4.61  
4.60  
4.59  
4.56  
4.55  
4.53  
4.50  
4.47  
4.45  
4.42  
3.82  
3.80  
3.80  
3.78  
3.72  
3.71  
3.70  
3.68  
3.66  
3.65  
3.63  
3.56  
3.49  
2.32  
2.31  
2.29  
2.28  
2.28  
2.26  
2.25  
2.22  
0.97  
0.92  
0.02

**19o** (<sup>1</sup>H NMR, 400MHz, CDCl<sub>3</sub>)

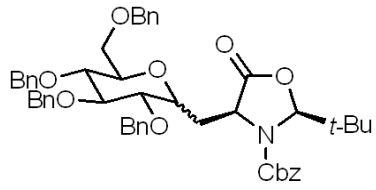

**19o**, major  $\alpha$

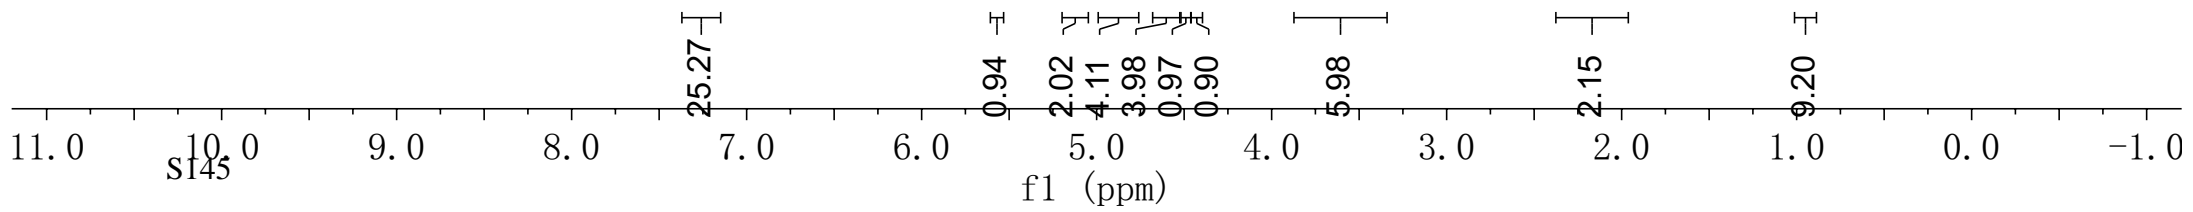

SI45

173.12  
172.50  
155.60  
138.92  
138.68  
138.56  
138.27  
138.01  
137.87  
135.33  
128.88  
128.85  
128.81  
128.80  
128.69  
128.57  
128.54  
128.49  
128.45  
128.42  
128.33  
128.07  
128.02  
127.97  
127.94  
127.92  
127.89  
127.88  
127.78  
127.76  
127.72  
127.68  
96.09  
87.45  
82.29  
82.02  
79.32  
78.78  
78.56  
77.90  
77.16  
75.60  
75.15  
74.91  
73.63  
73.51  
72.76  
71.74  
69.93  
68.83  
68.54  
68.43  
54.21  
52.89  
37.30  
36.88  
28.44  
25.19  
25.00

**19o** ( $^{13}\text{C}$  NMR, 101MHz,  $\text{CDCl}_3$ )

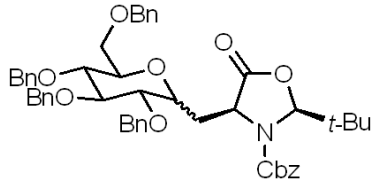

**19o**, major  $\alpha$

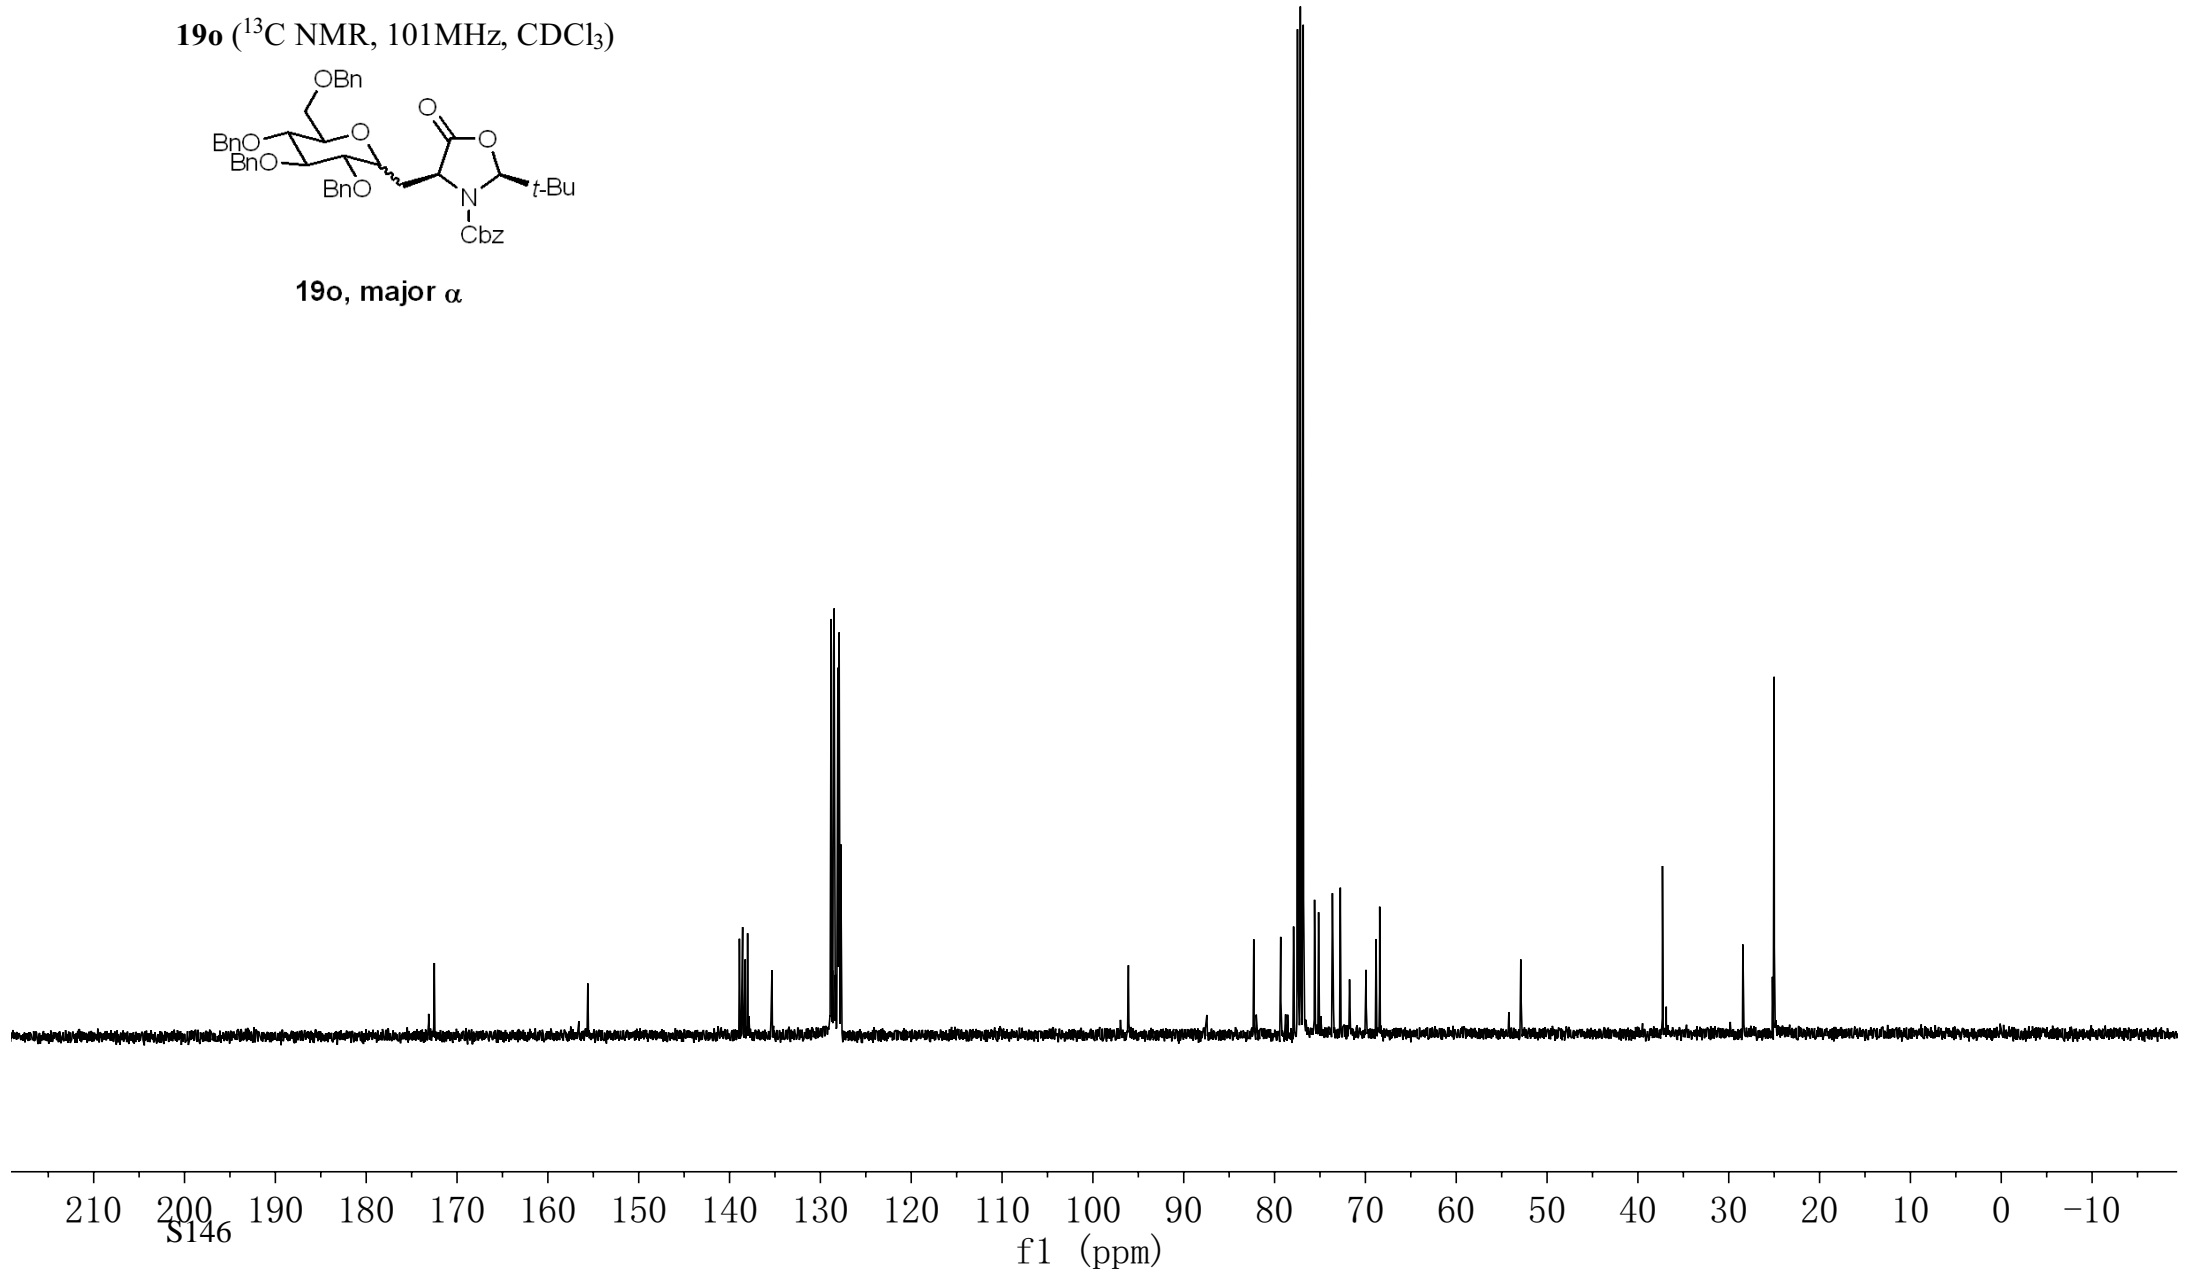

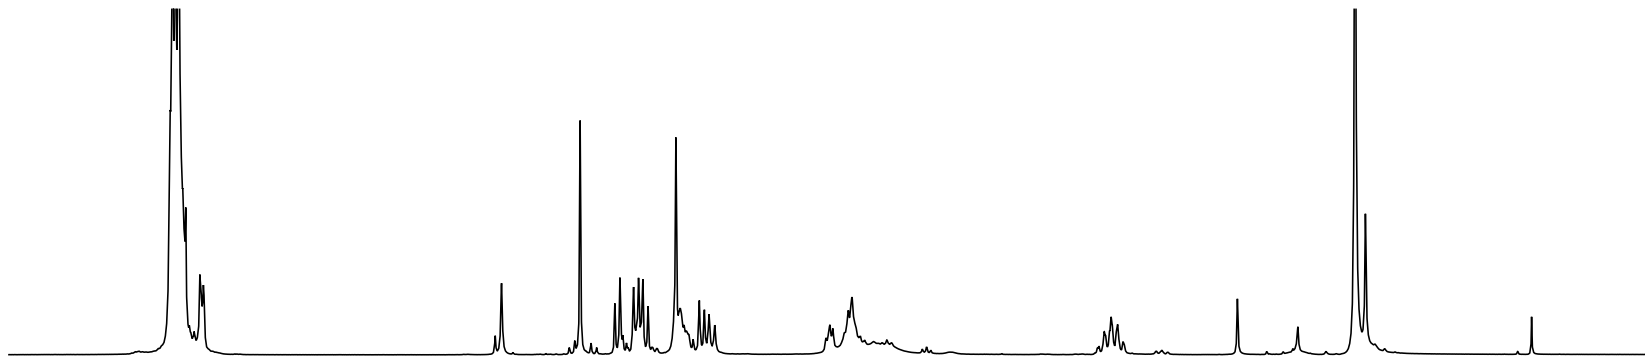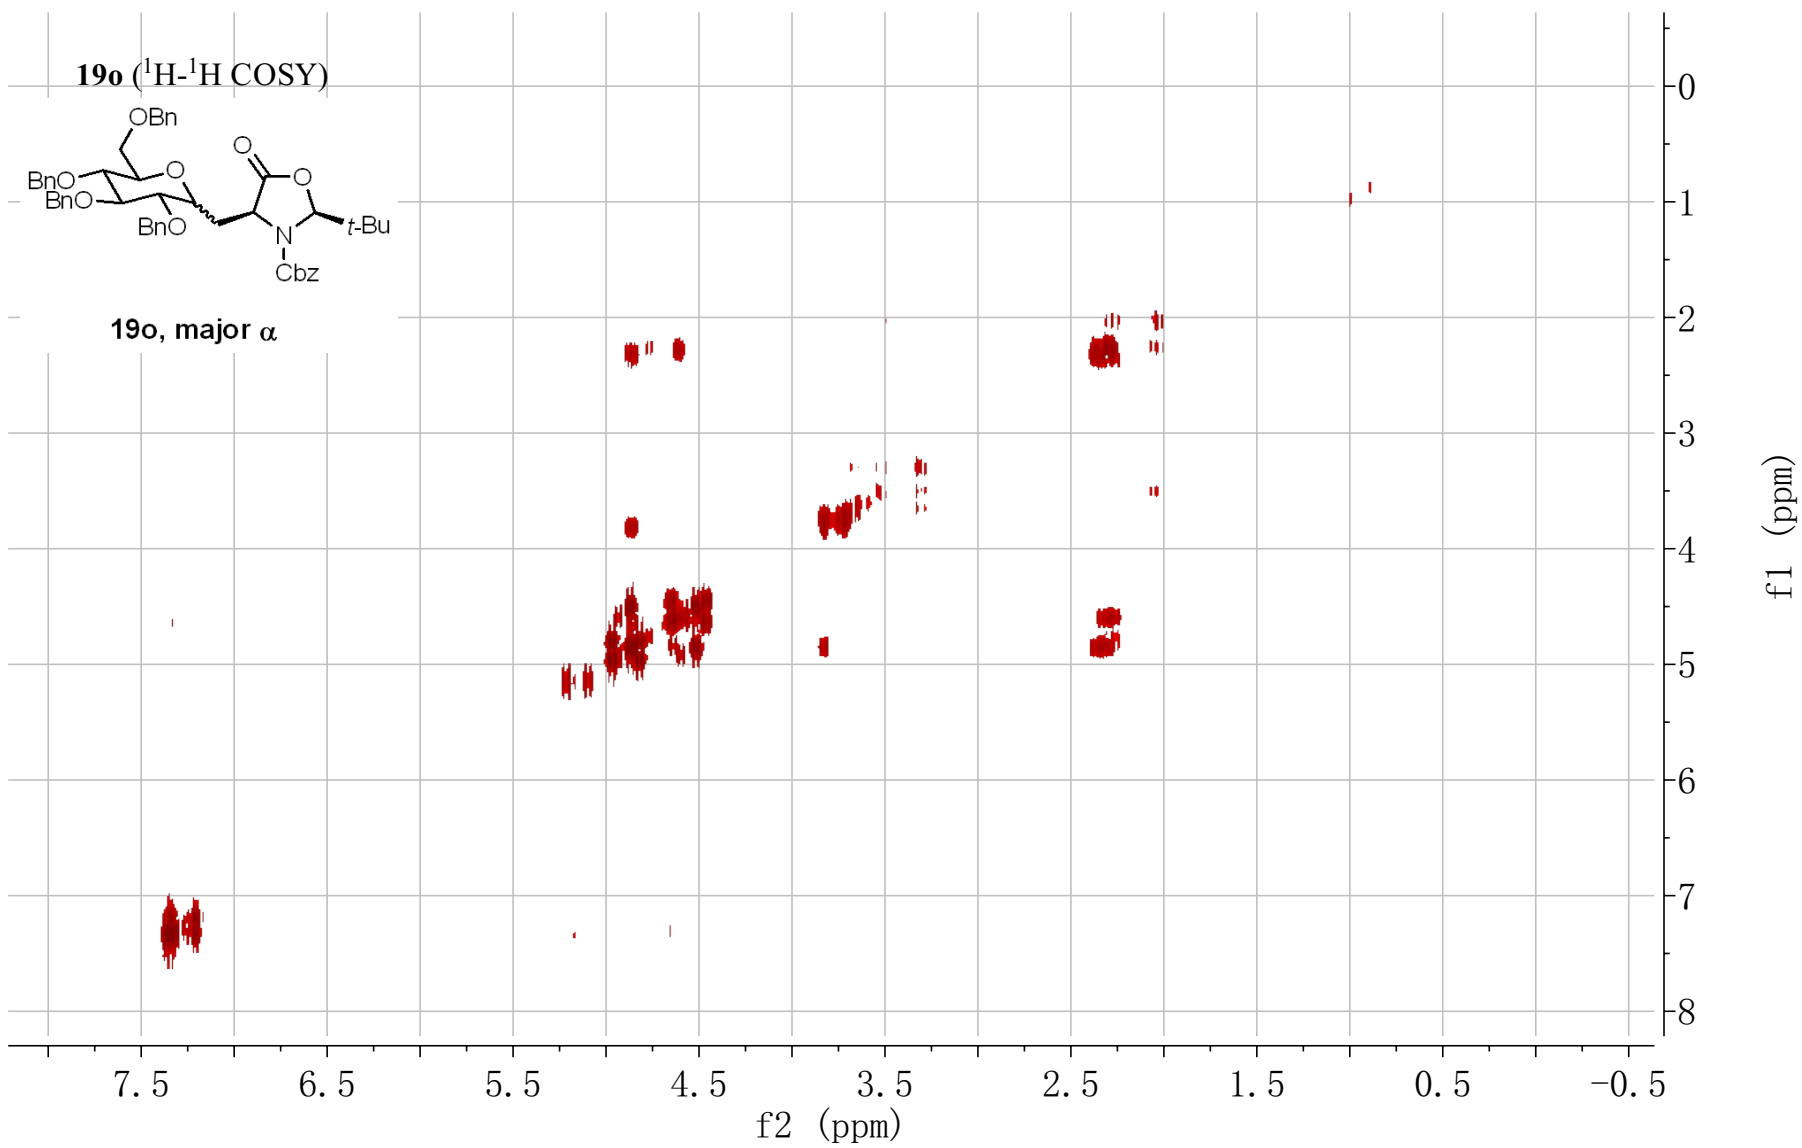

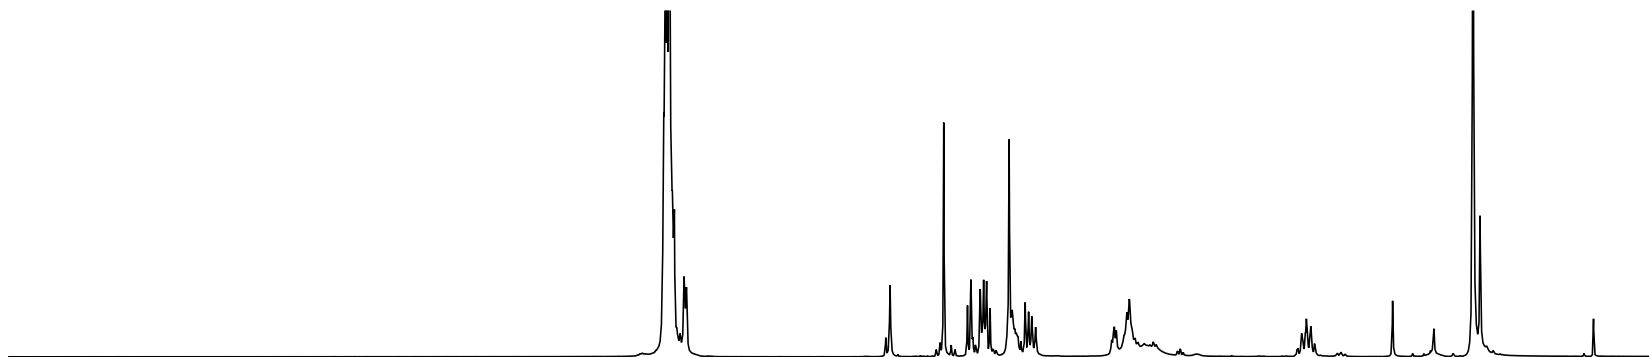

**19o** (<sup>1</sup>H-<sup>13</sup>C Coupled HSQC )

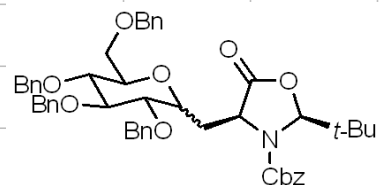

**19o, major  $\alpha$**

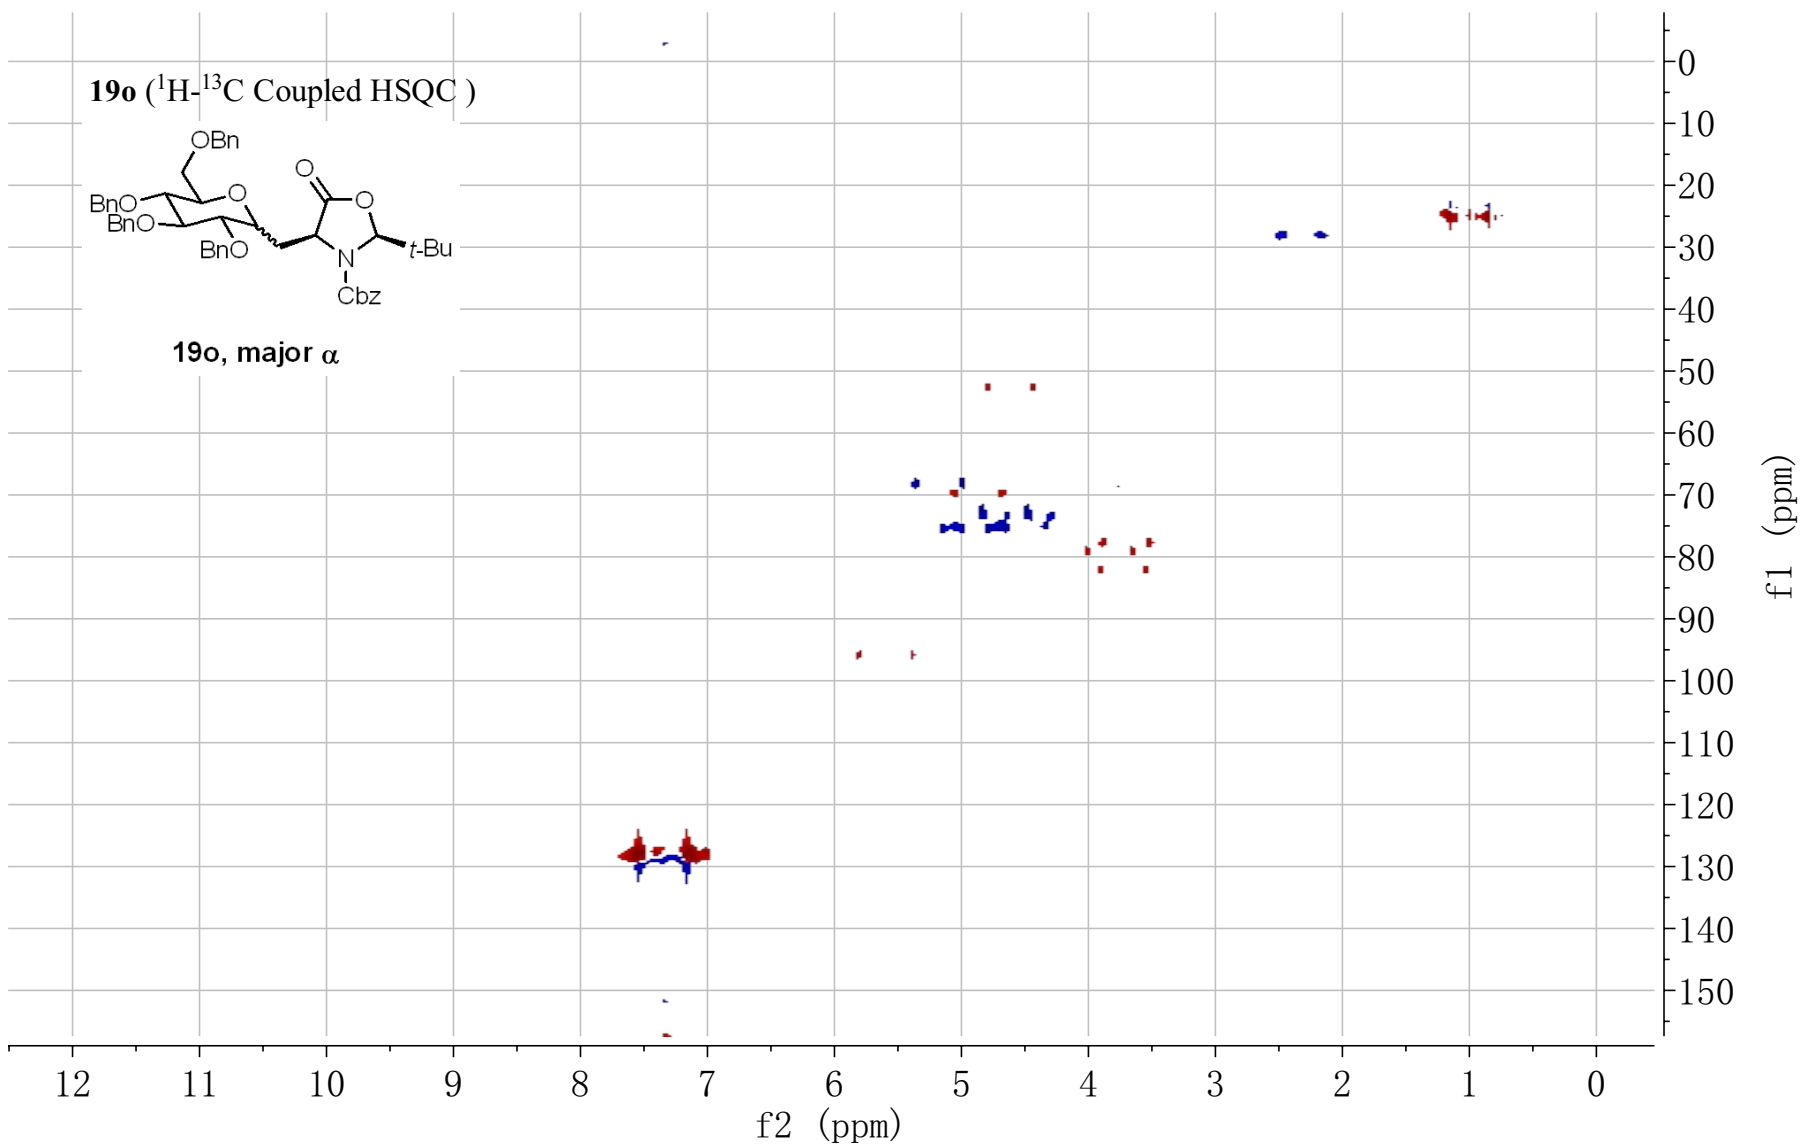

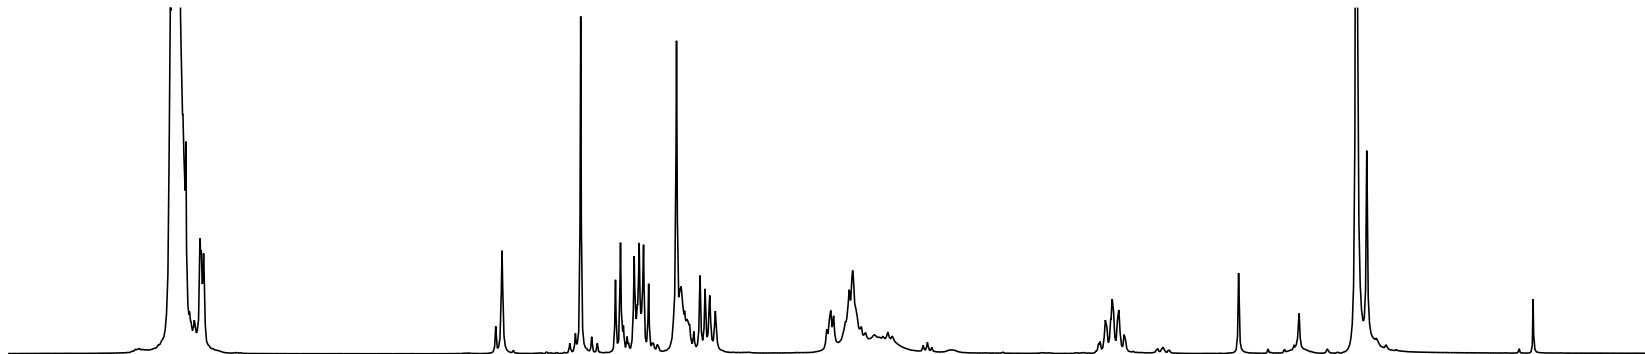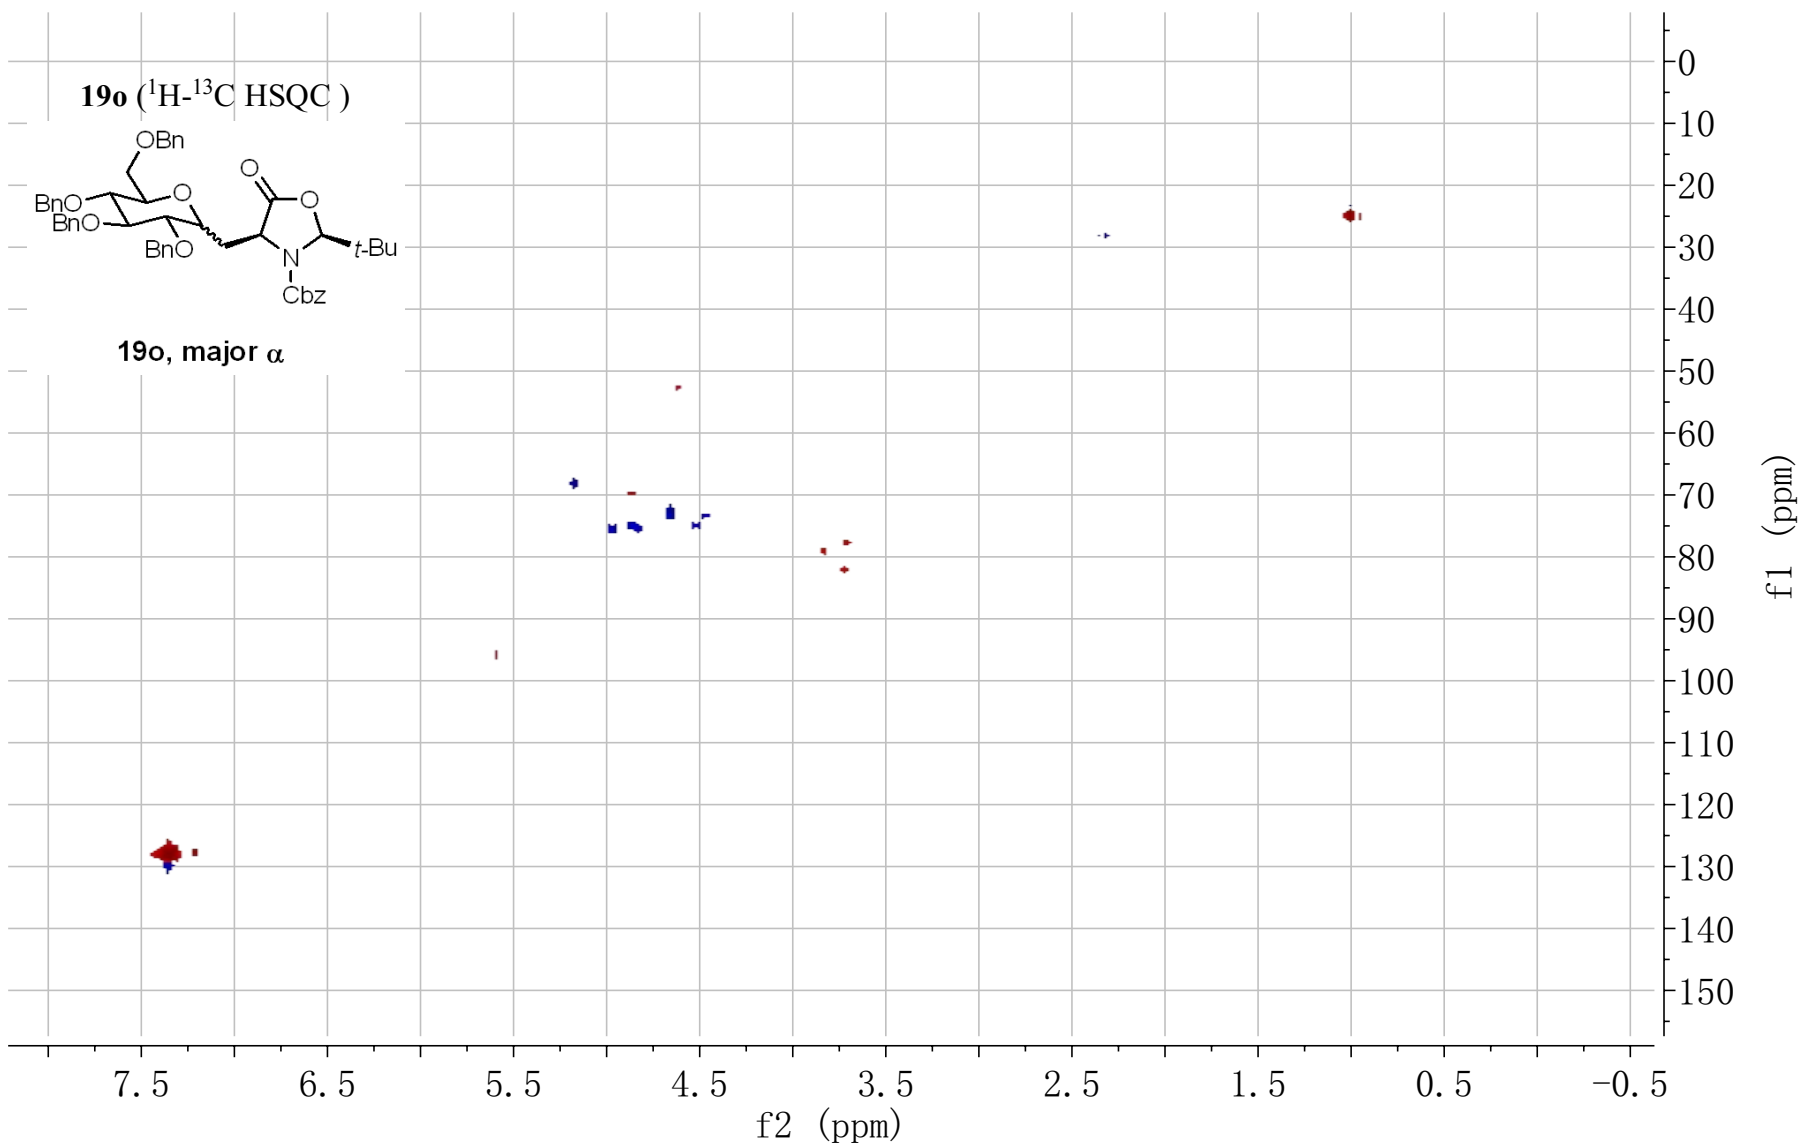



7.38  
7.37  
7.37  
7.36  
7.36  
7.35  
7.35  
7.34  
7.33  
7.33  
7.32  
7.31  
7.30  
7.29  
7.29  
7.28  
7.27  
5.56  
5.22  
5.19  
5.14  
5.11  
4.80  
4.77  
4.63  
4.61  
4.59  
4.57  
4.56  
4.56  
4.54  
4.50  
4.49  
4.49  
4.48  
4.38  
4.37  
4.36  
3.84  
3.82  
3.81  
3.75  
3.75  
3.74  
3.73  
3.62  
3.61  
3.60  
3.60  
3.58  
2.26  
2.25  
2.24  
1.90  
1.90  
1.89  
1.37  
1.35  
0.93

**19p** (<sup>1</sup>H NMR, 400MHz, CDCl<sub>3</sub>)

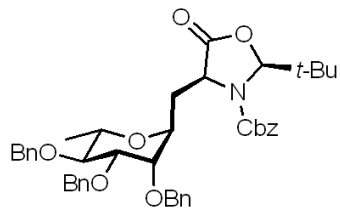

**19p**

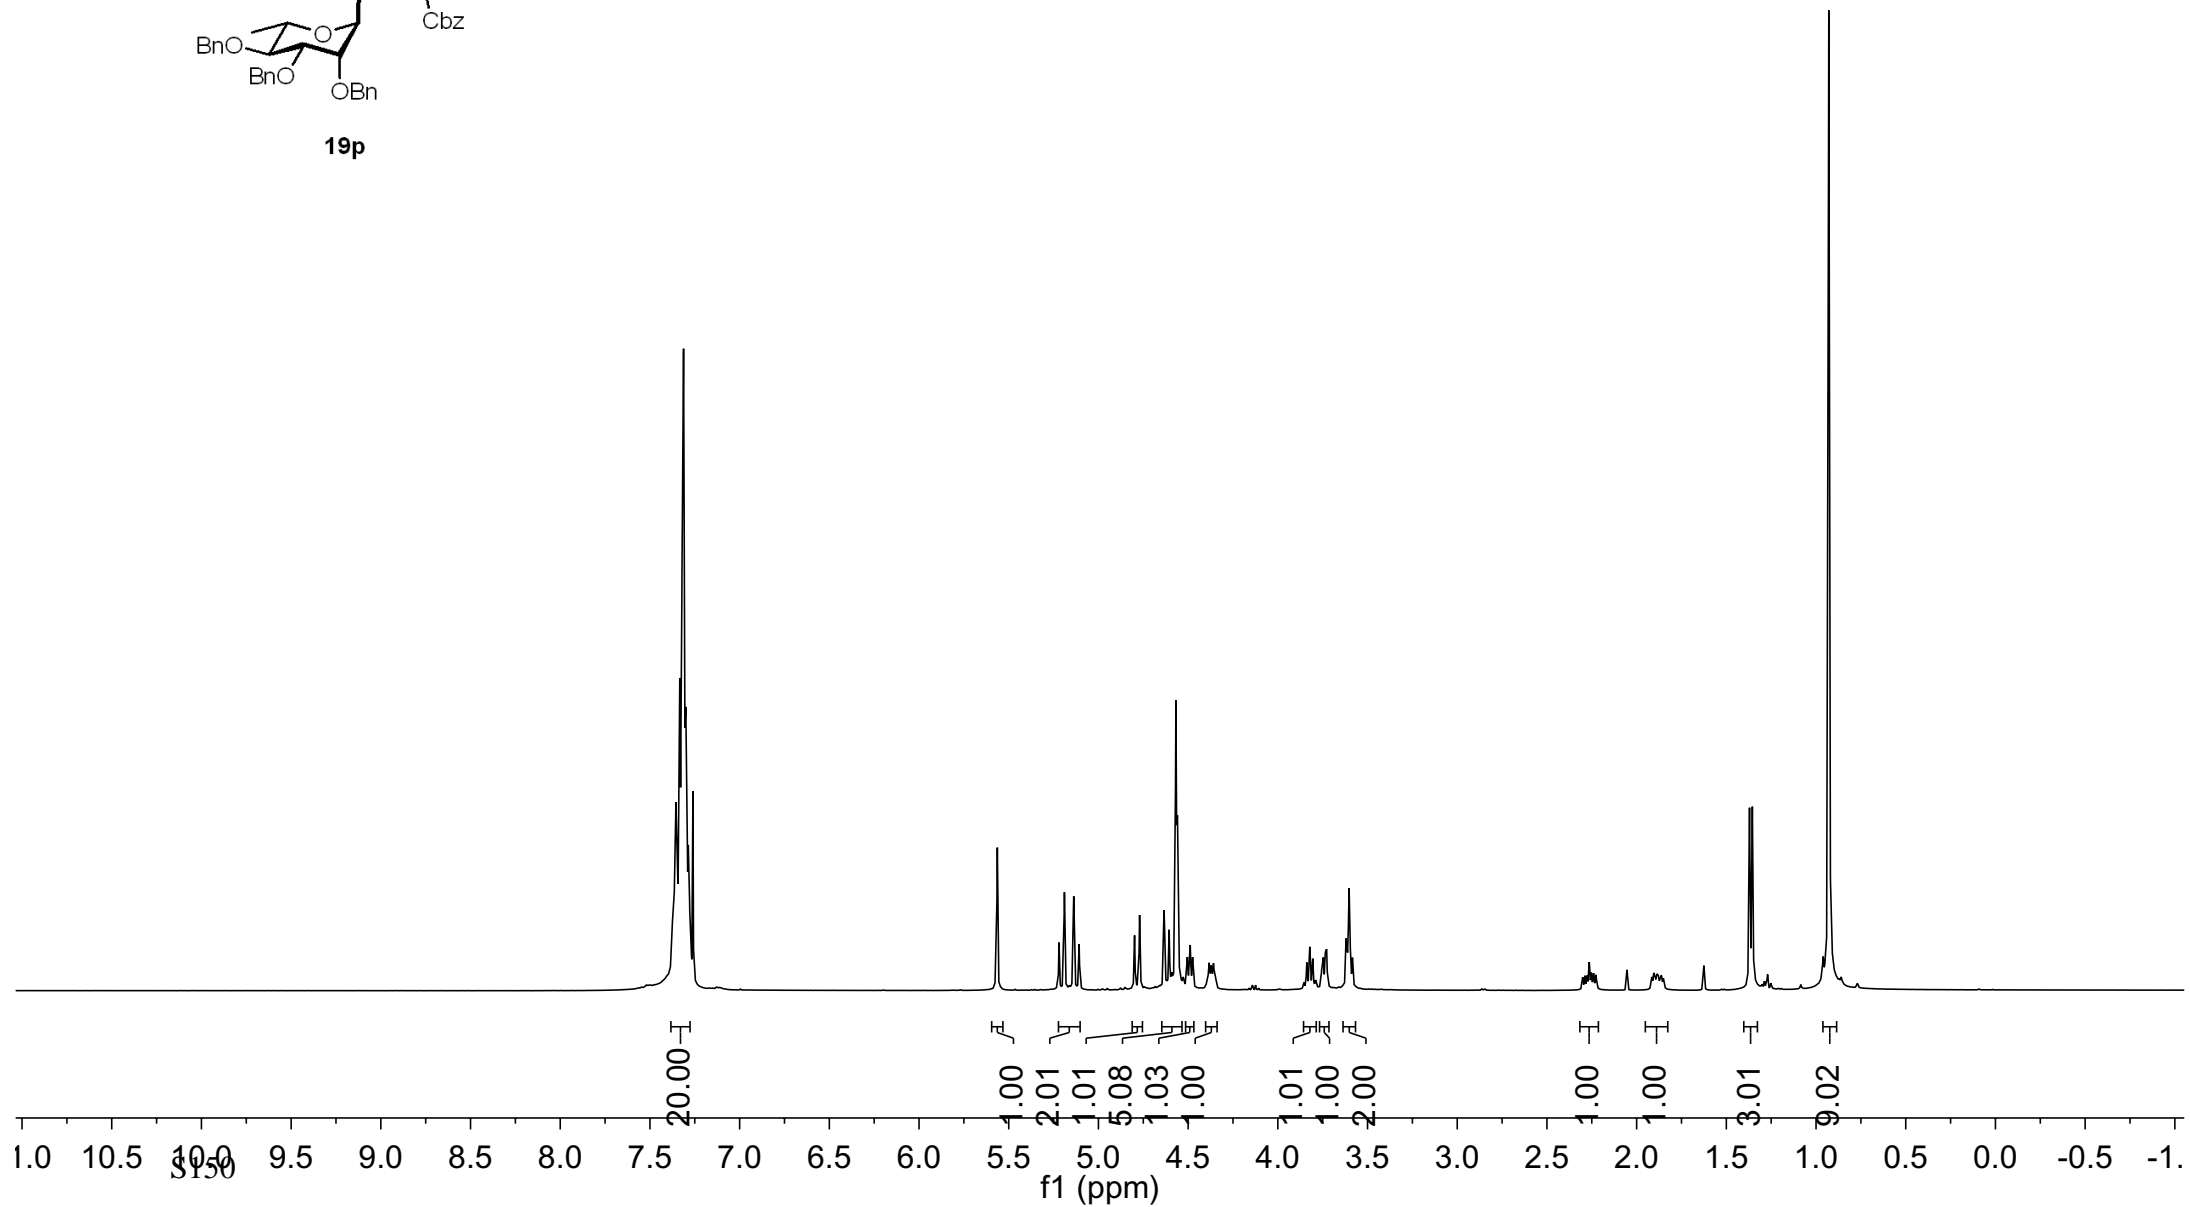

**19p** (<sup>13</sup>C NMR, 101MHz, CDCl<sub>3</sub>)

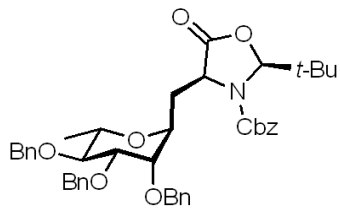

**19p**

172.79  
156.09  
138.61  
138.48  
138.33  
135.46  
128.81  
128.74  
128.66  
128.51  
128.46  
128.43  
128.11  
127.99  
127.92  
127.78  
127.76  
96.61  
80.00  
77.86  
77.48  
77.16  
76.84  
76.11  
74.31  
72.29  
71.60  
69.87  
69.82  
68.45  
54.48  
~37.07  
~34.56  
25.03  
18.14

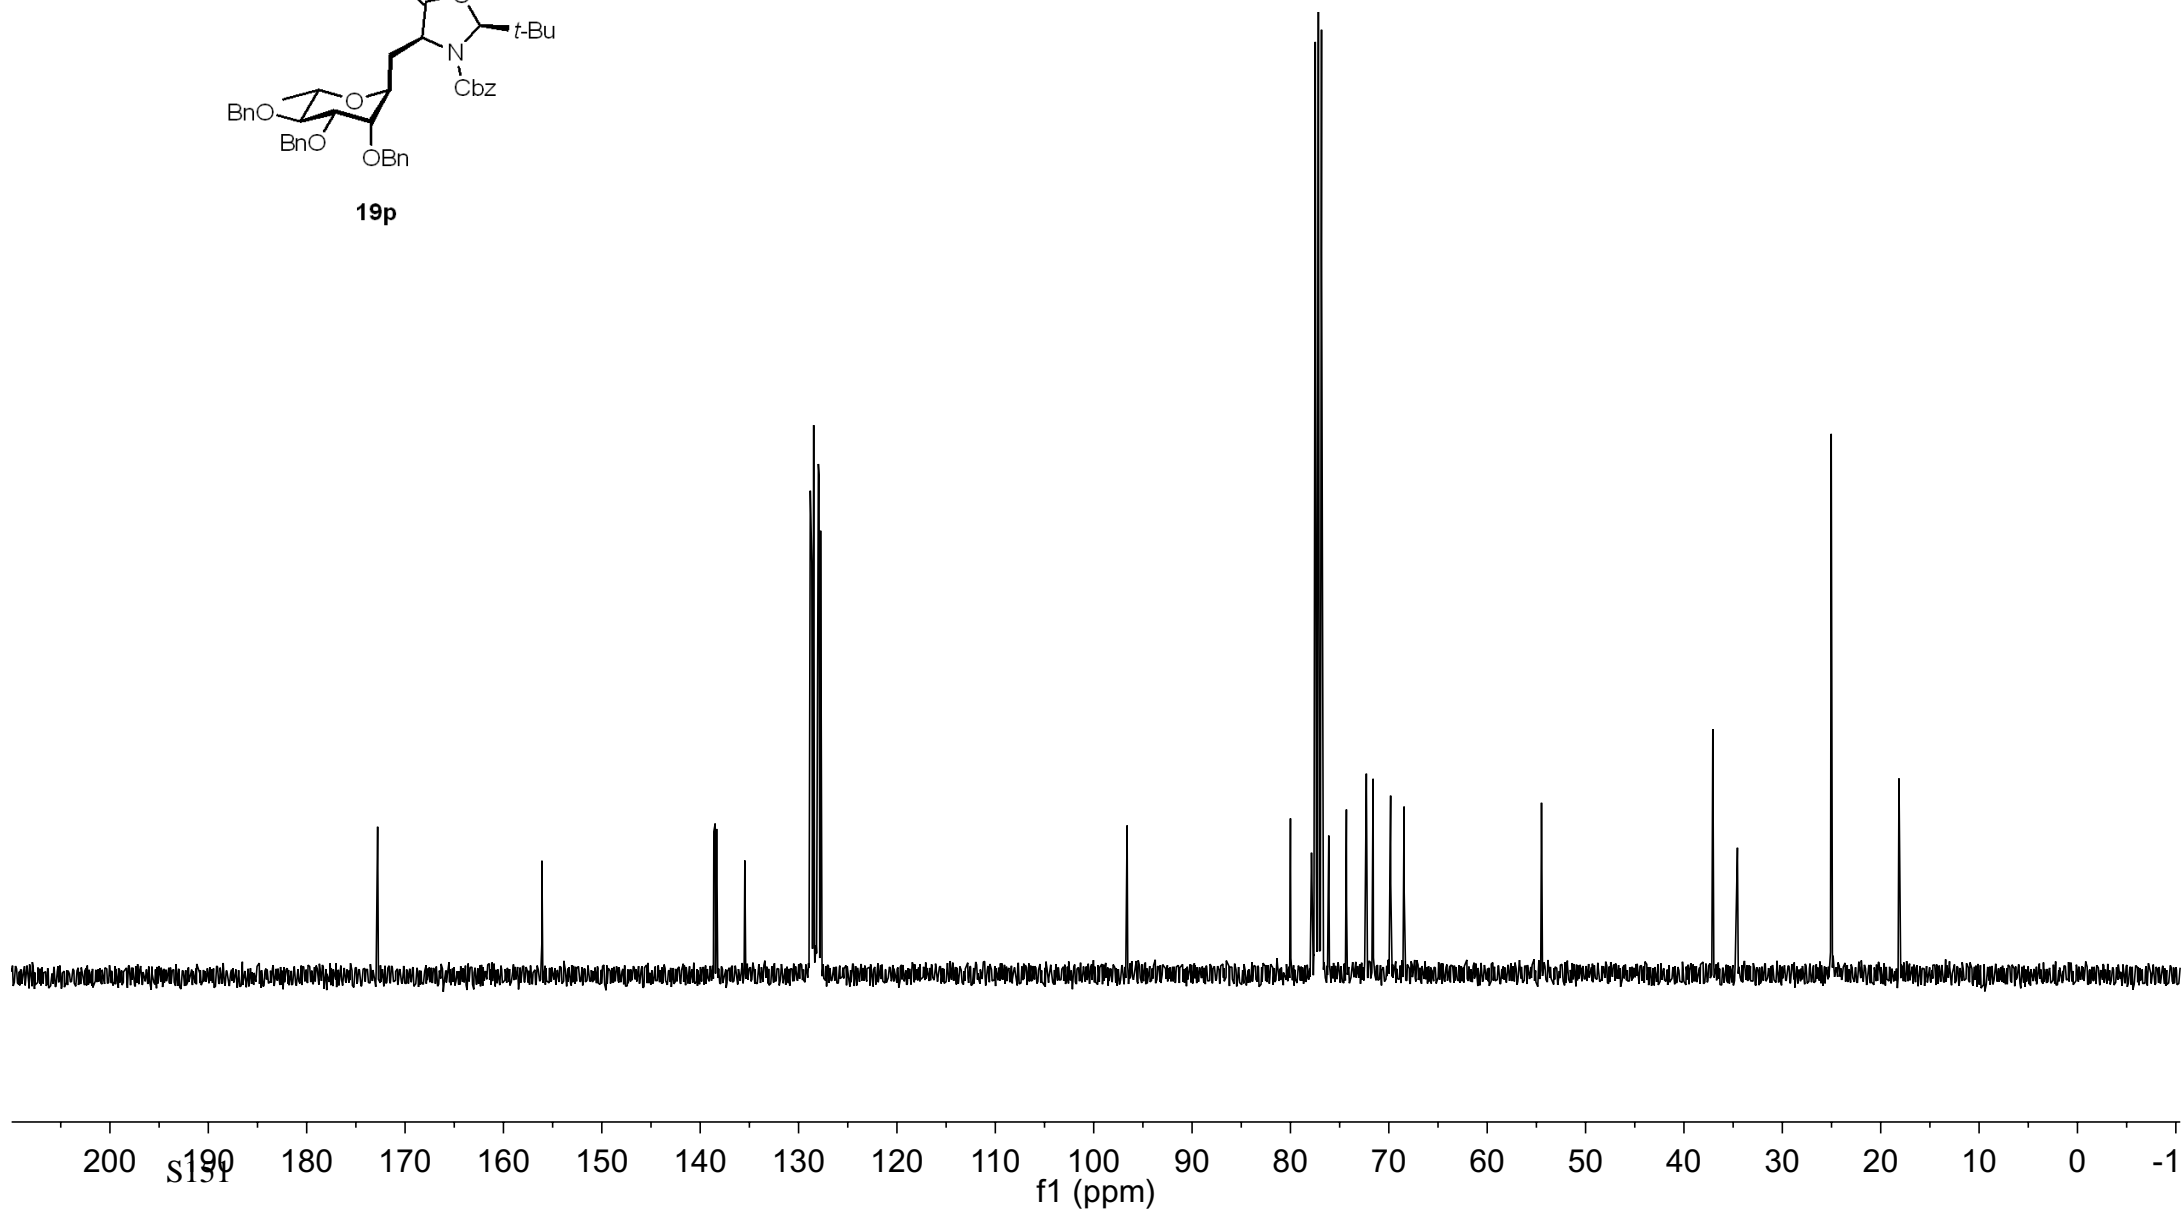

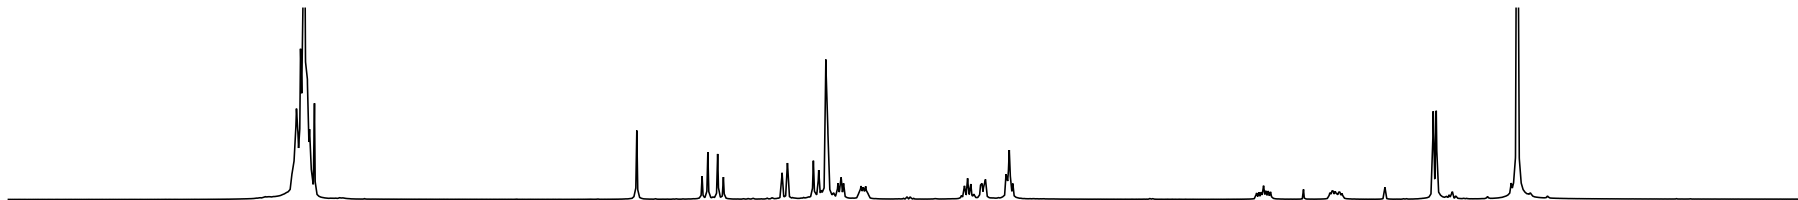

**19p** (<sup>1</sup>H - <sup>1</sup>H COSY)

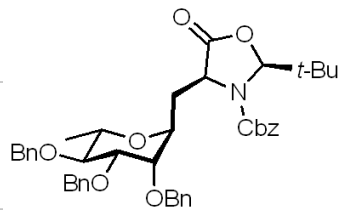

**19p**

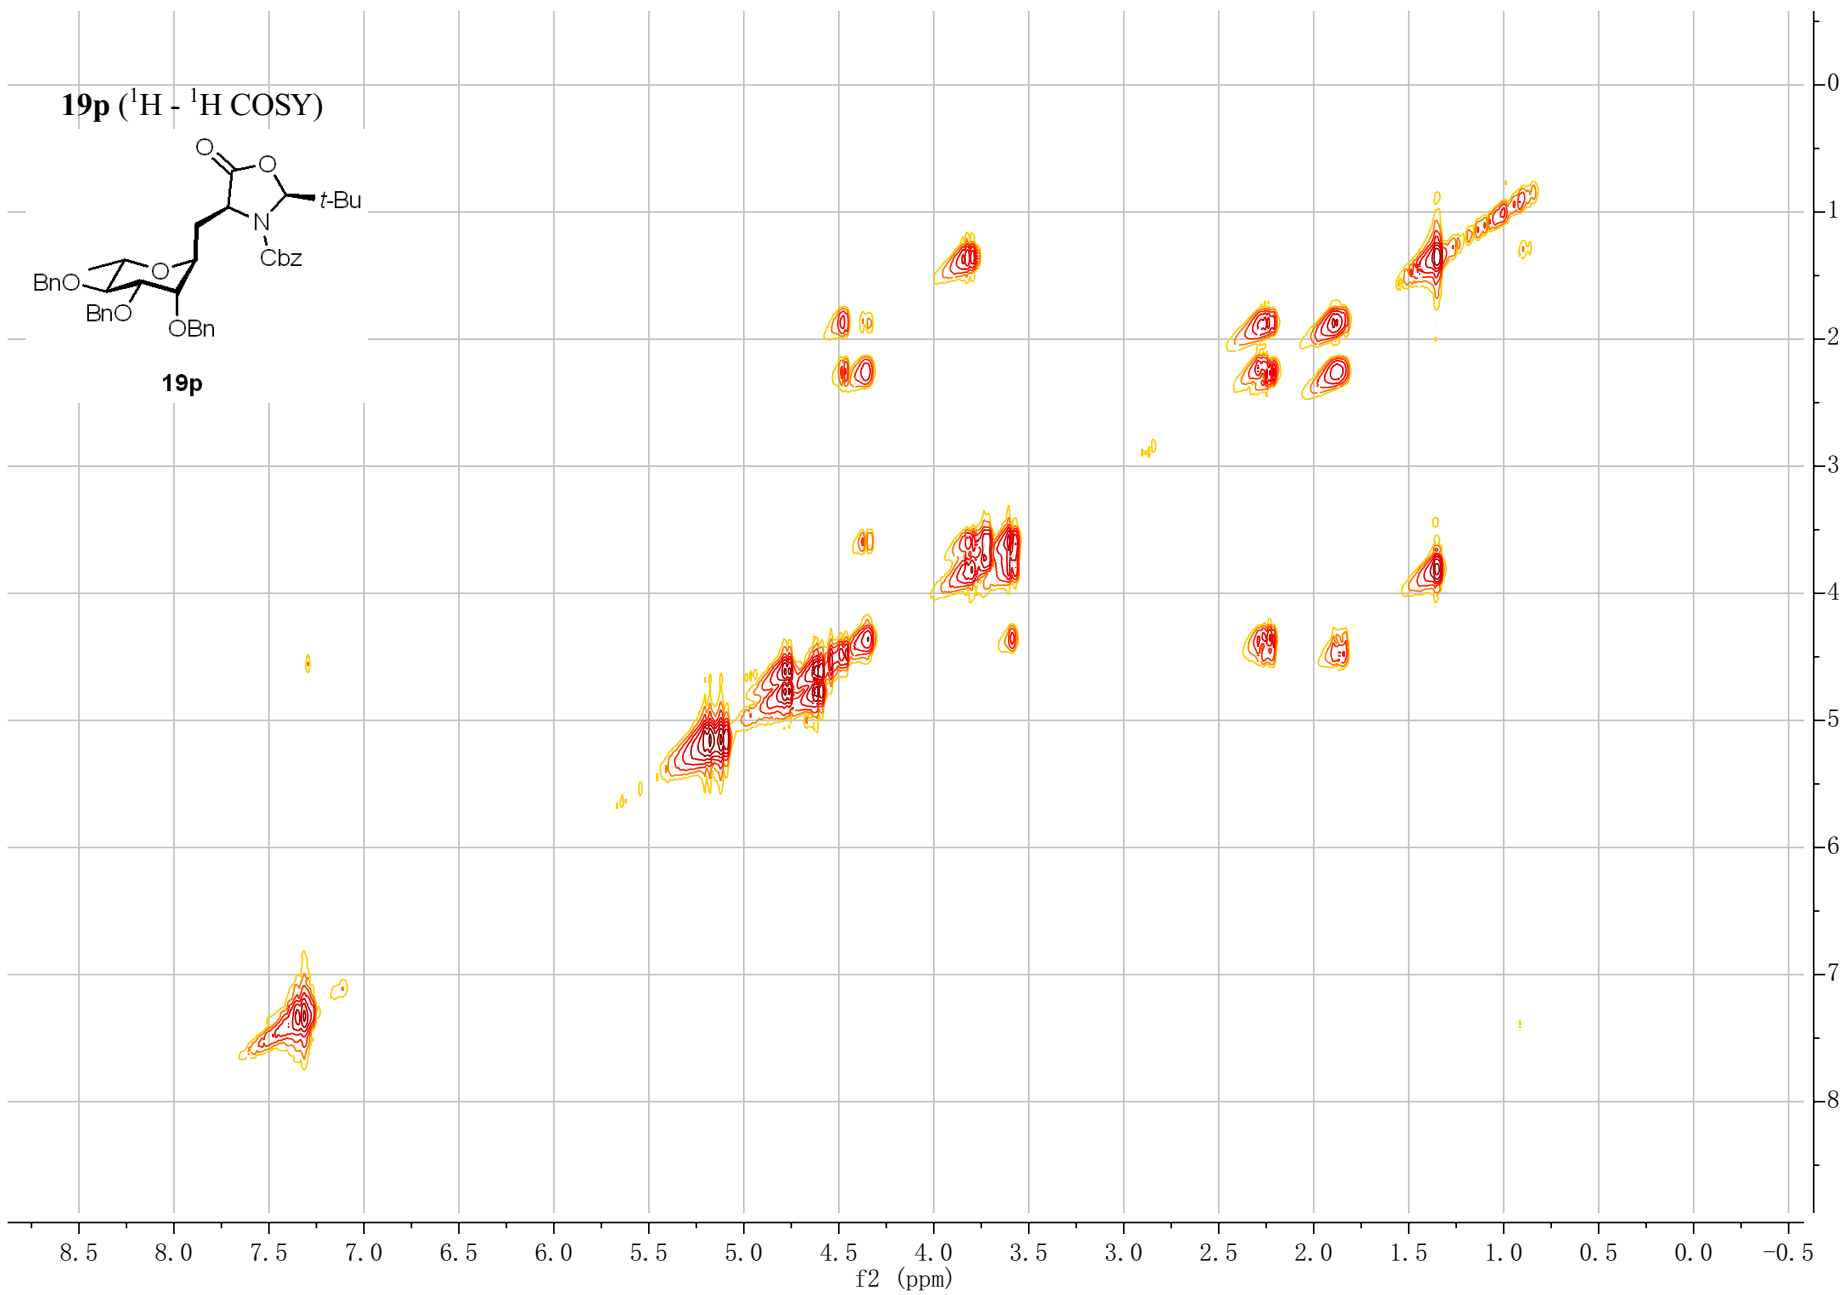

S152

f2 (ppm)

f1 (ppm)

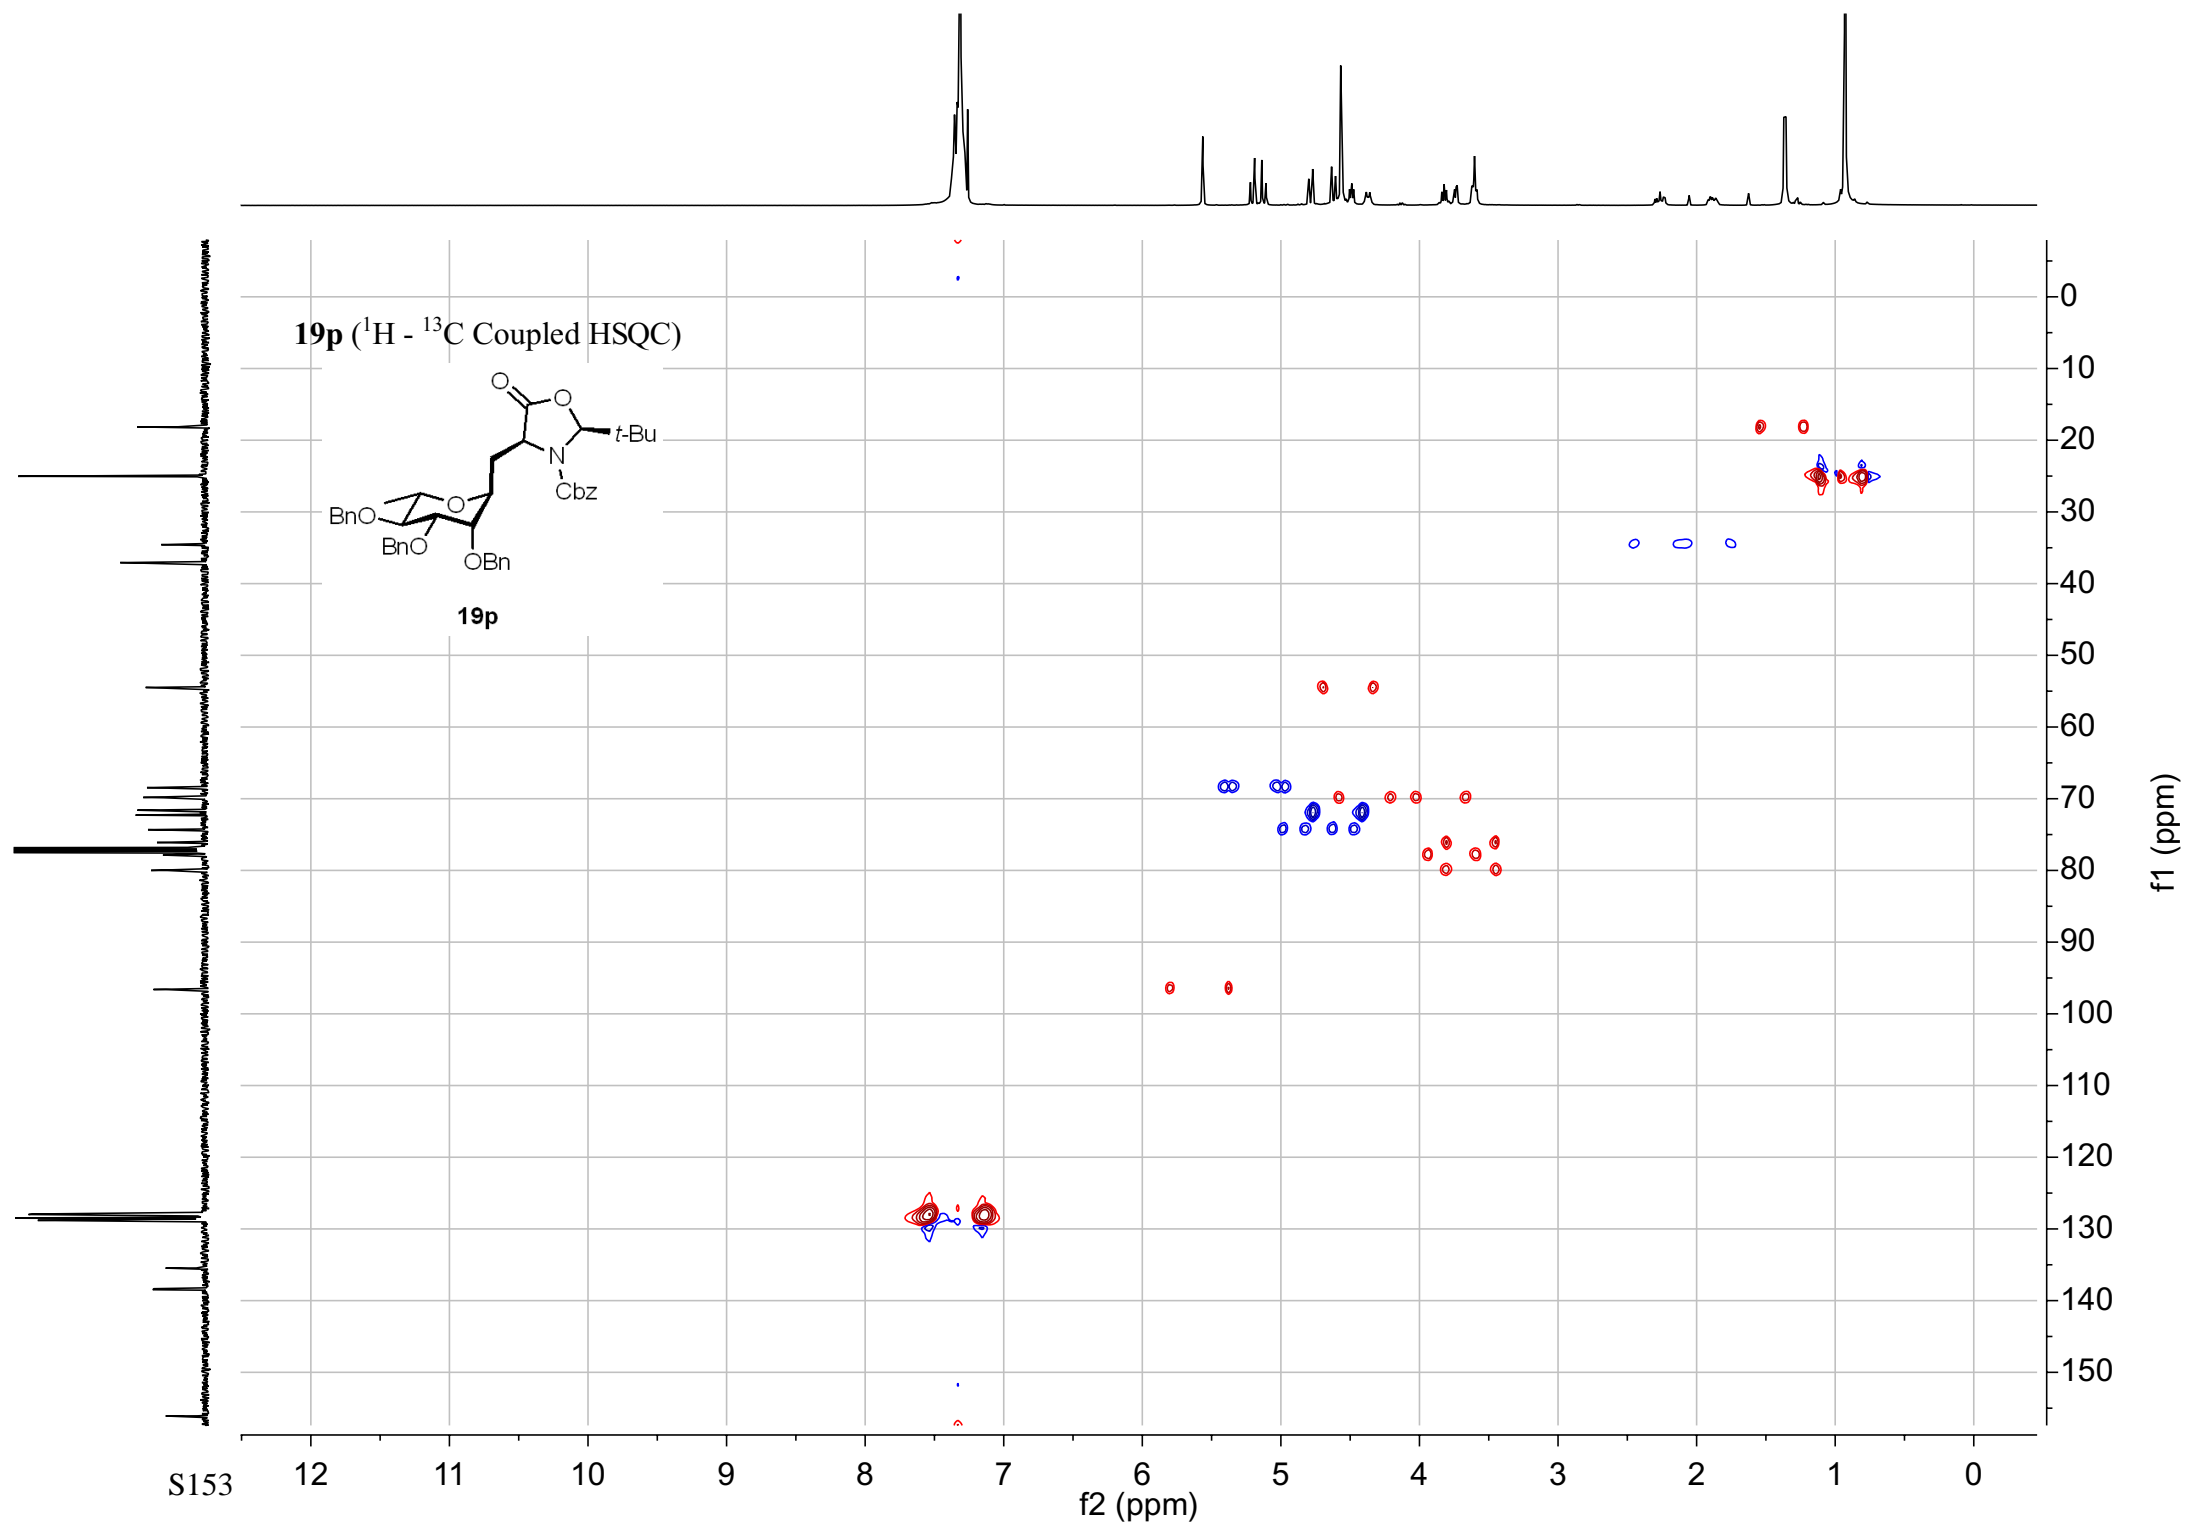

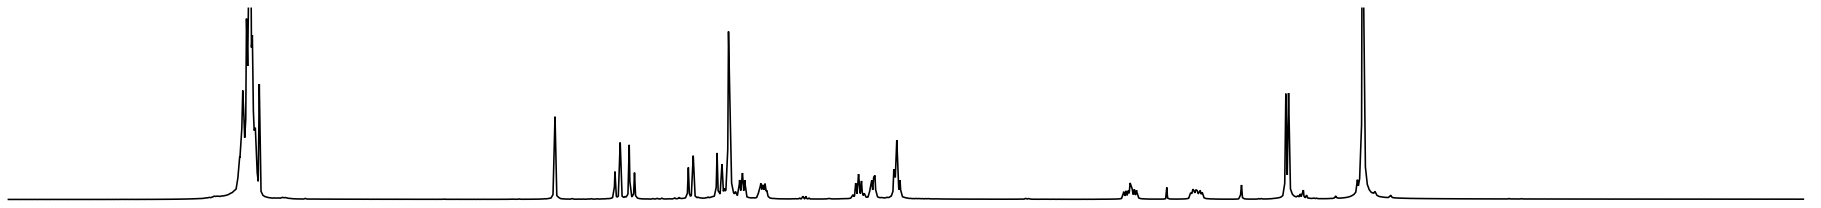

19p (<sup>1</sup>H - <sup>13</sup>C HSQC)

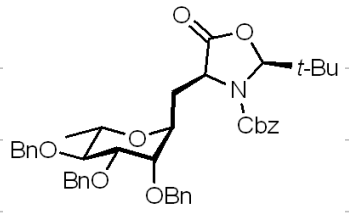

19p

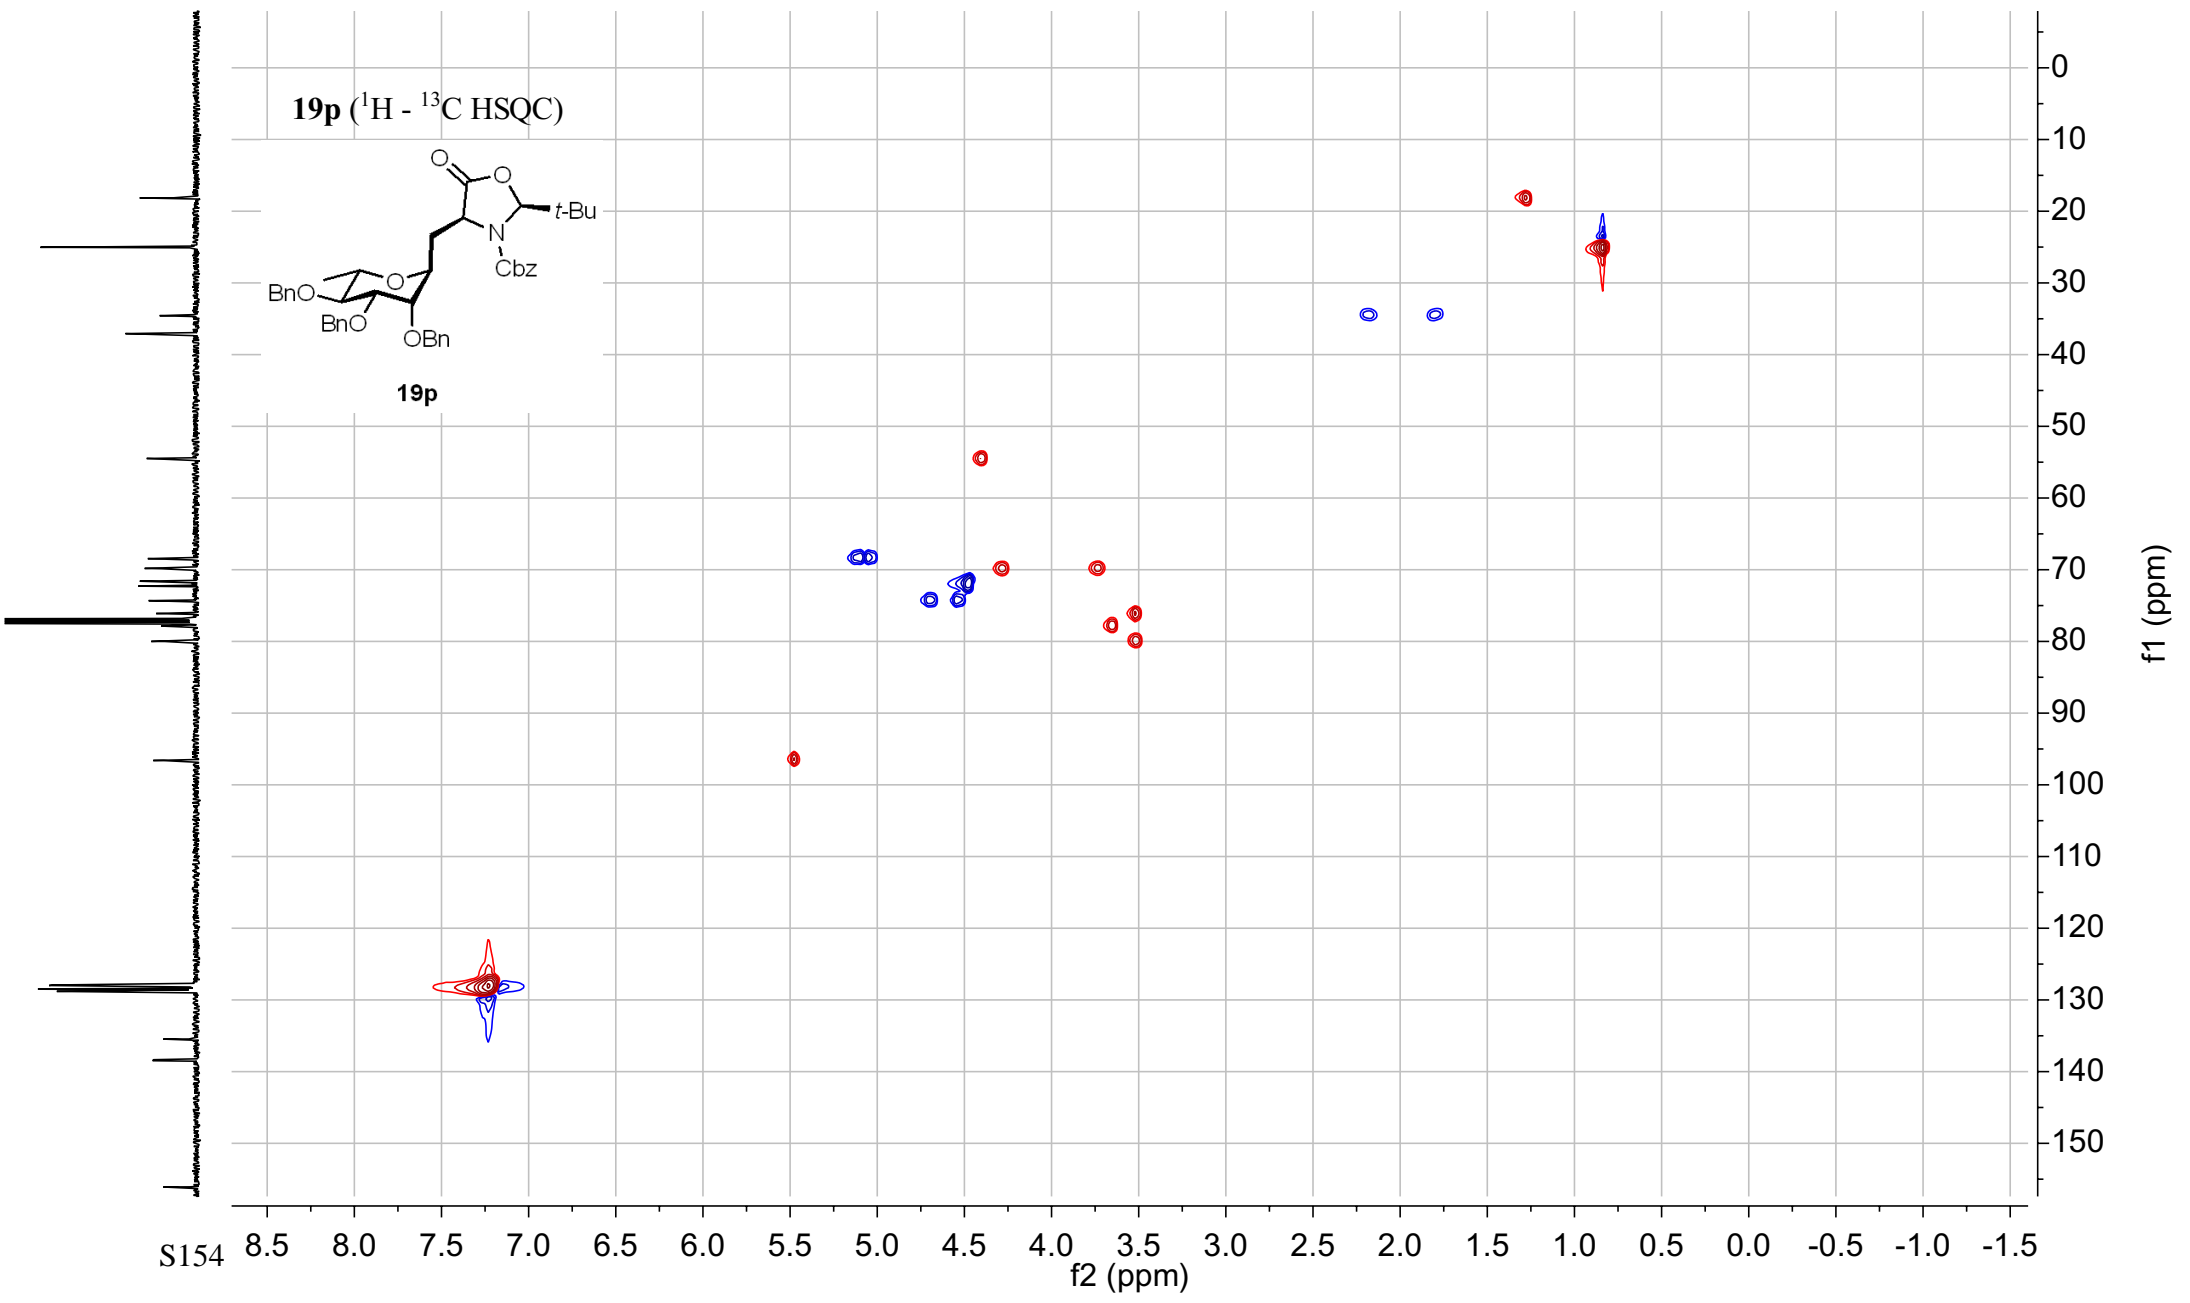

**19q** ( $^1\text{H}$  NMR, 400MHz,  $\text{CDCl}_3$ )

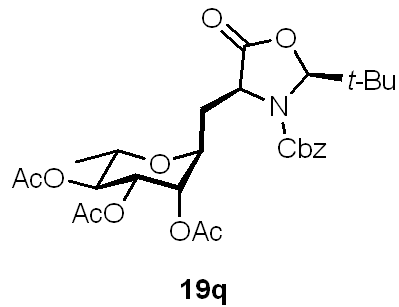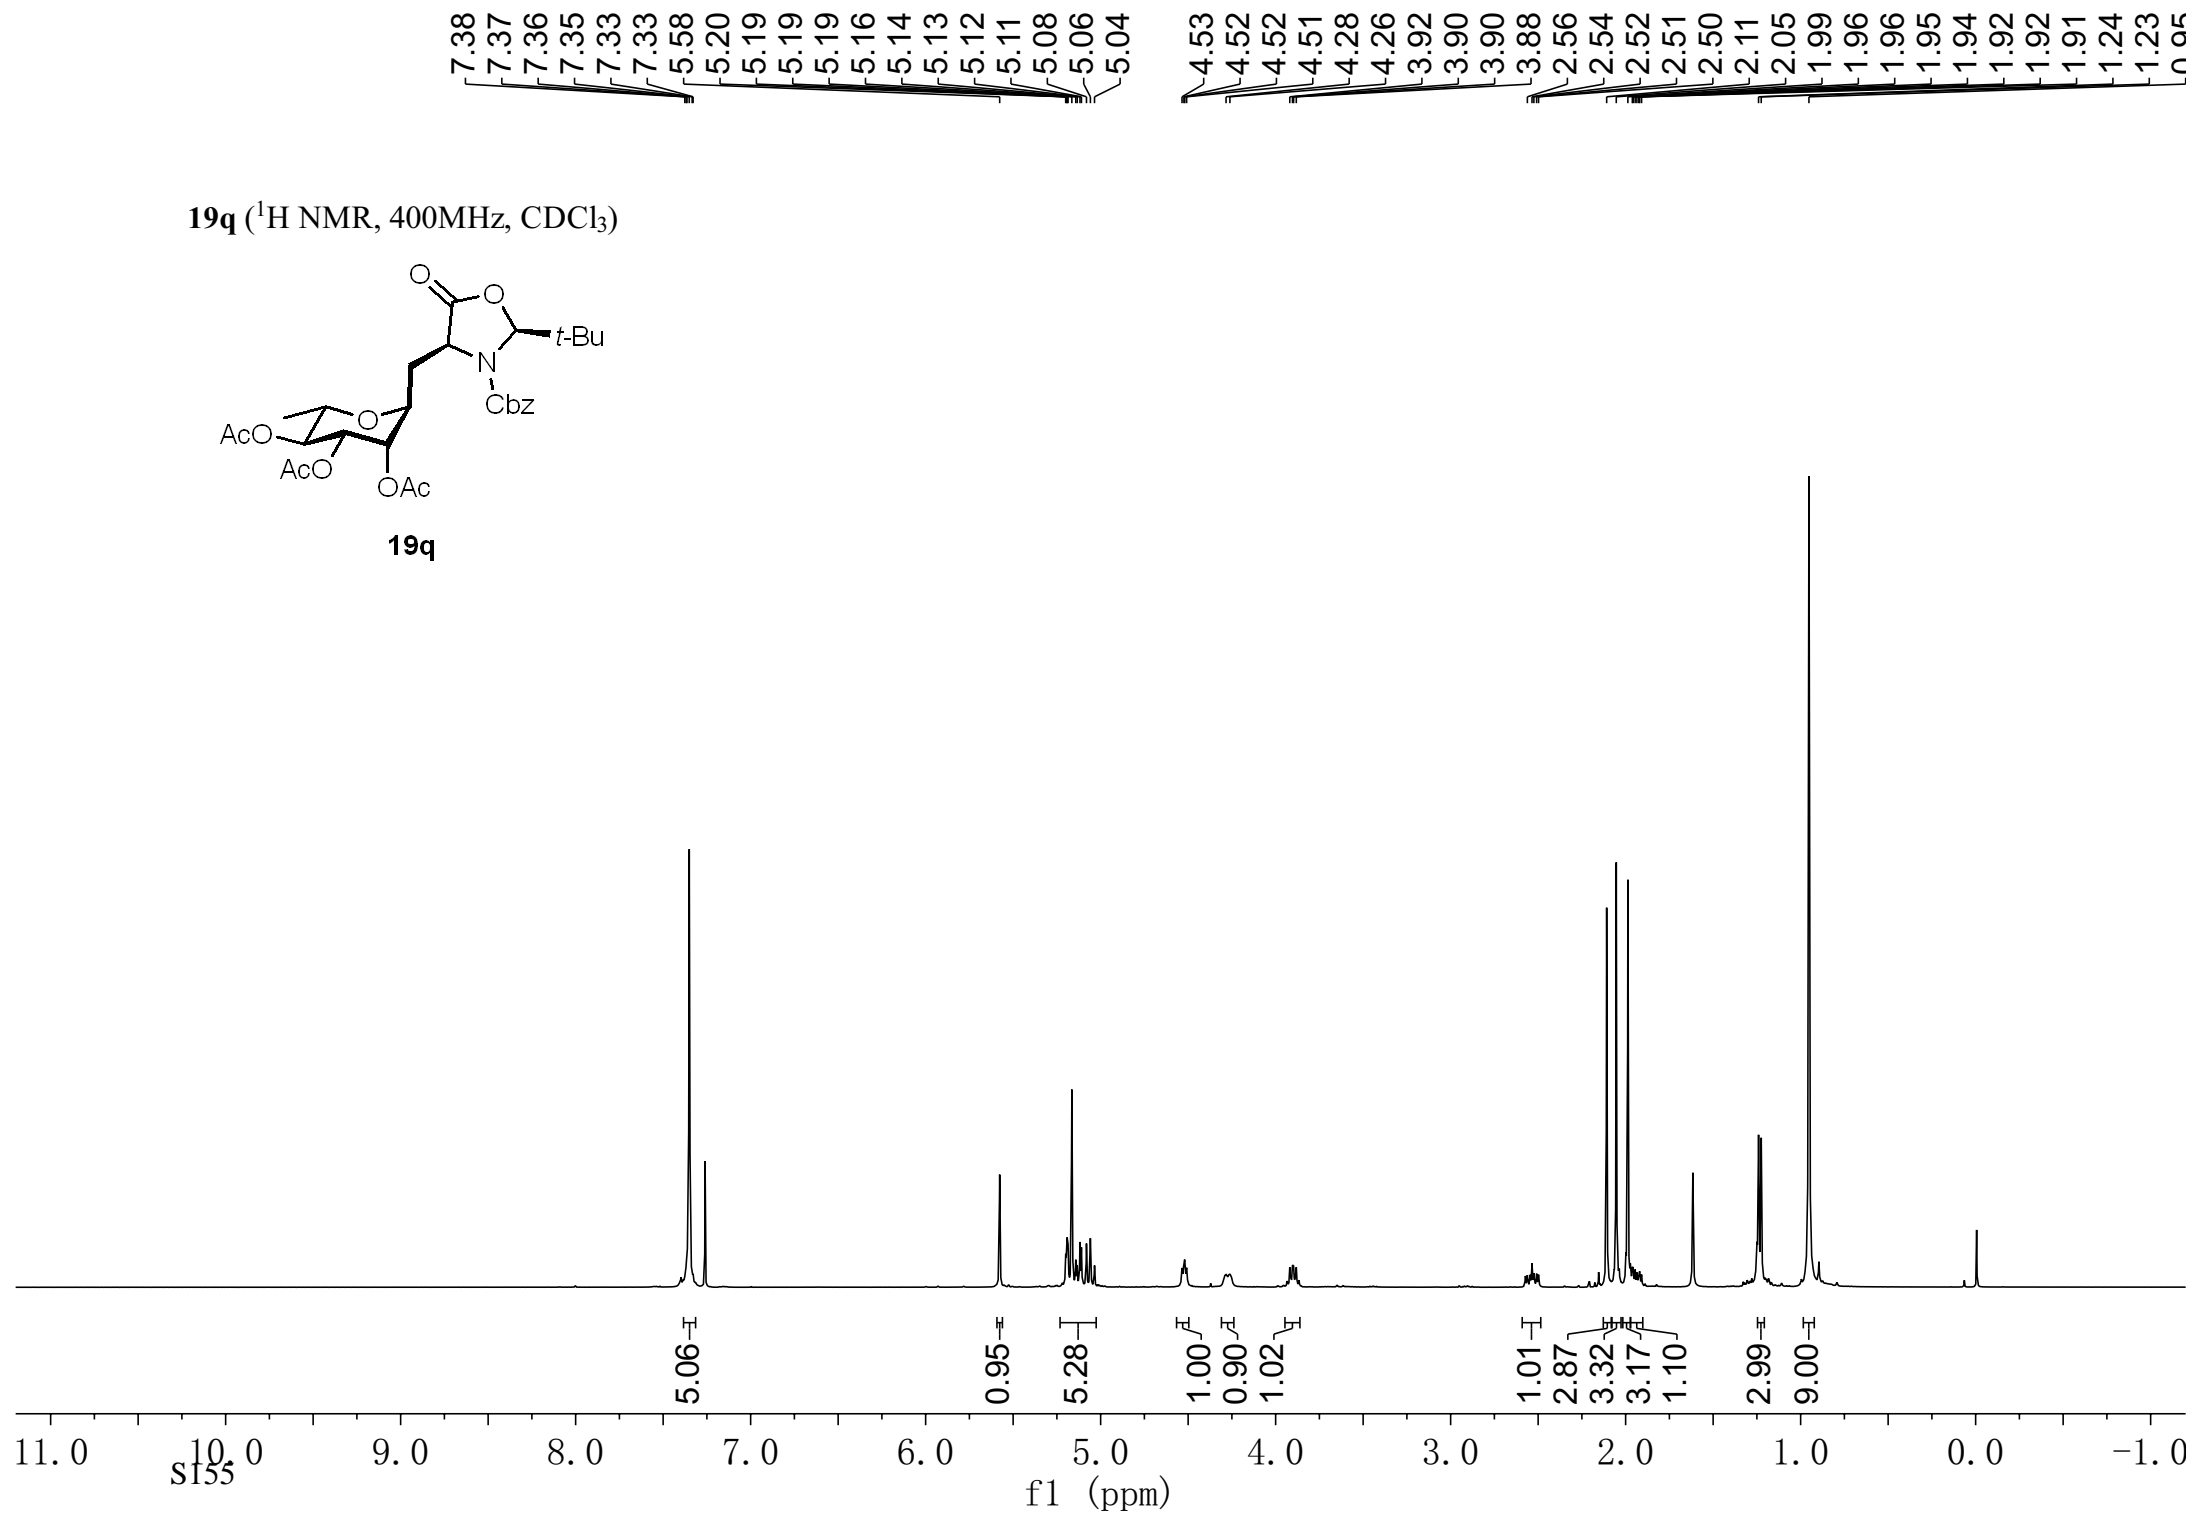

**19q** ( $^{13}\text{C}$  NMR, 101MHz,  $\text{CDCl}_3$ )

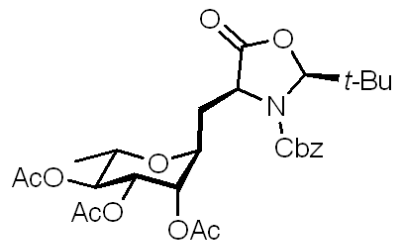

**19q**

172.85  
170.39  
170.30  
170.08  
— 155.96

135.20  
128.83  
128.79

— 96.80

77.16  
72.97  
71.35  
70.62  
69.41  
68.78  
68.11  
— 54.38

37.24  
33.64  
29.83  
24.93  
21.13  
20.97  
20.85  
17.82

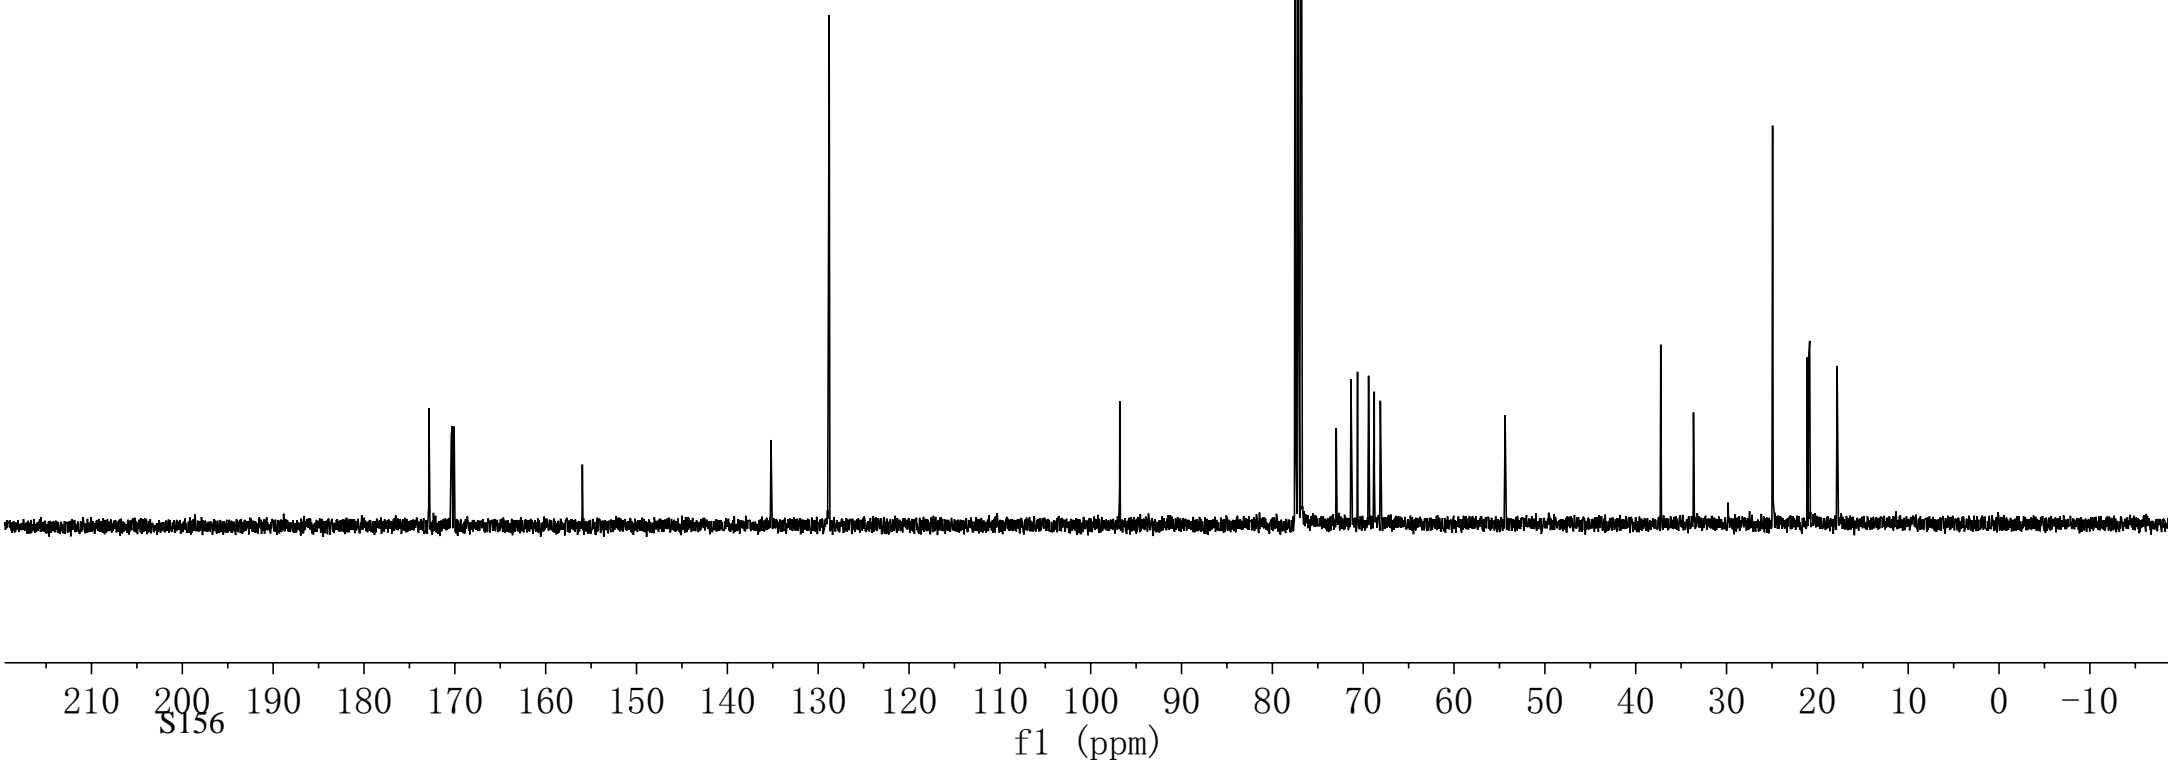

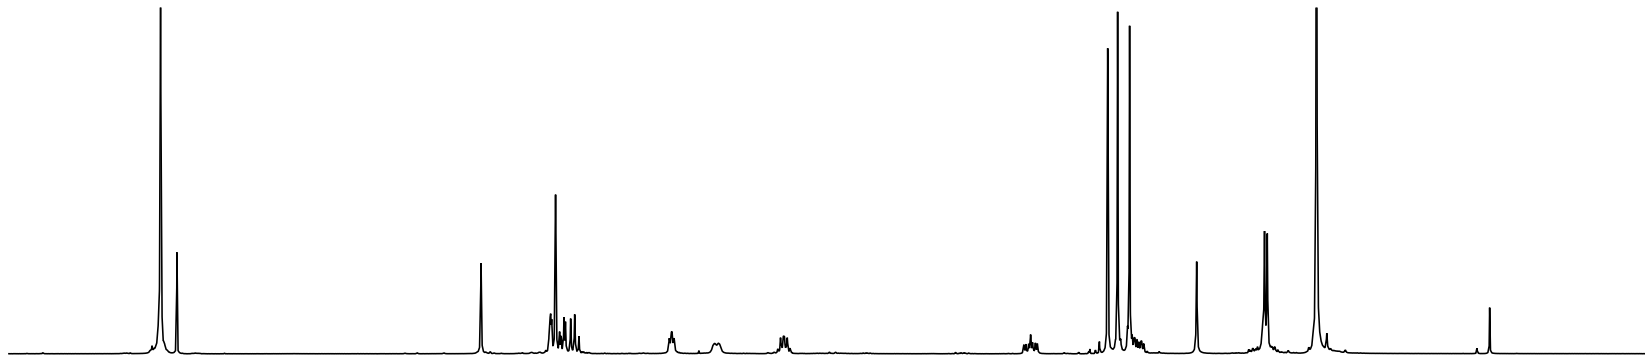

**19q** ( $^1\text{H}$ - $^1\text{H}$  COSY)

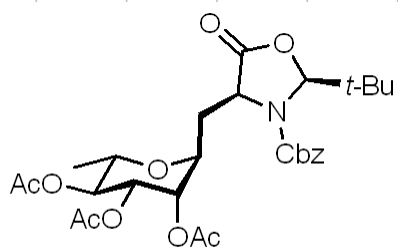

**19q**

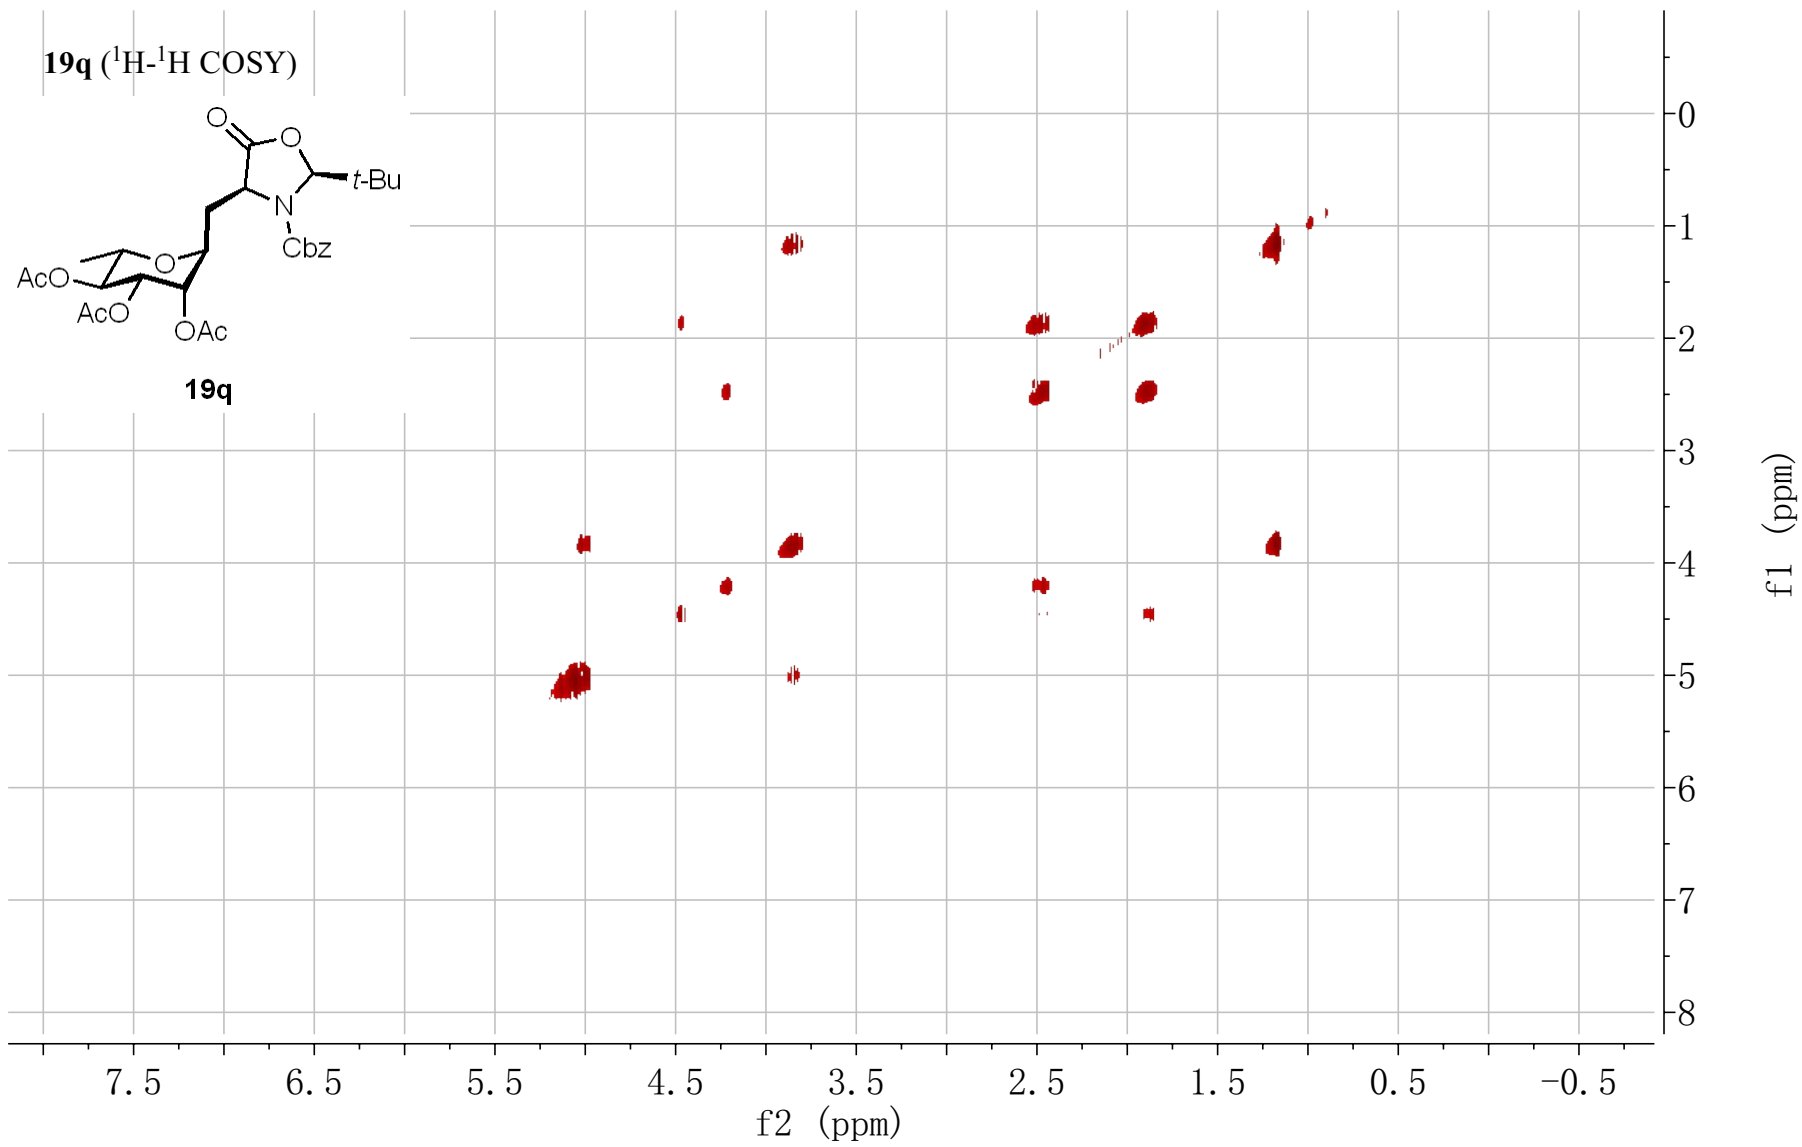



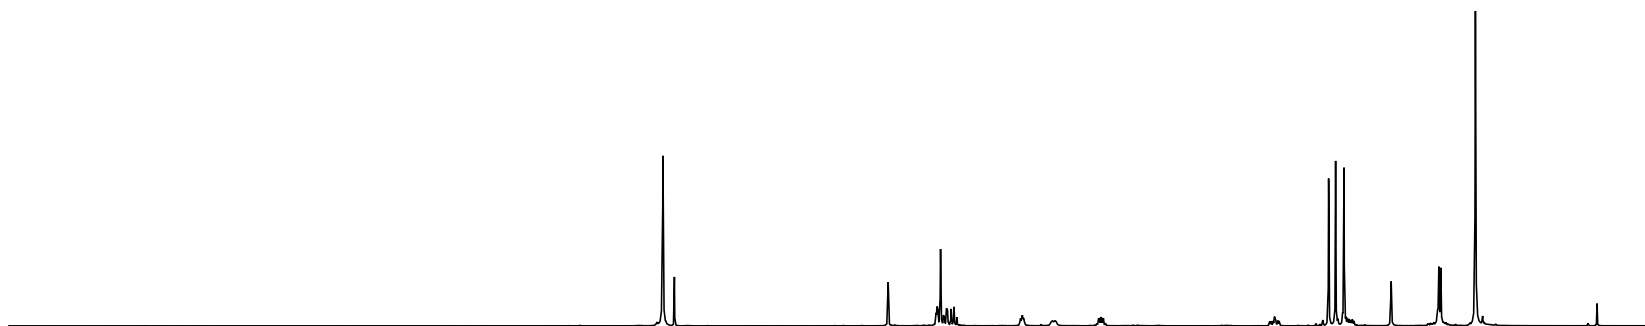

**19q** ( $^1\text{H}$ - $^{13}\text{C}$  Coupled HSQC )

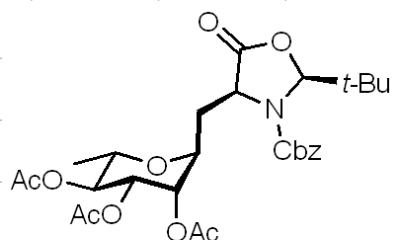

**19q**

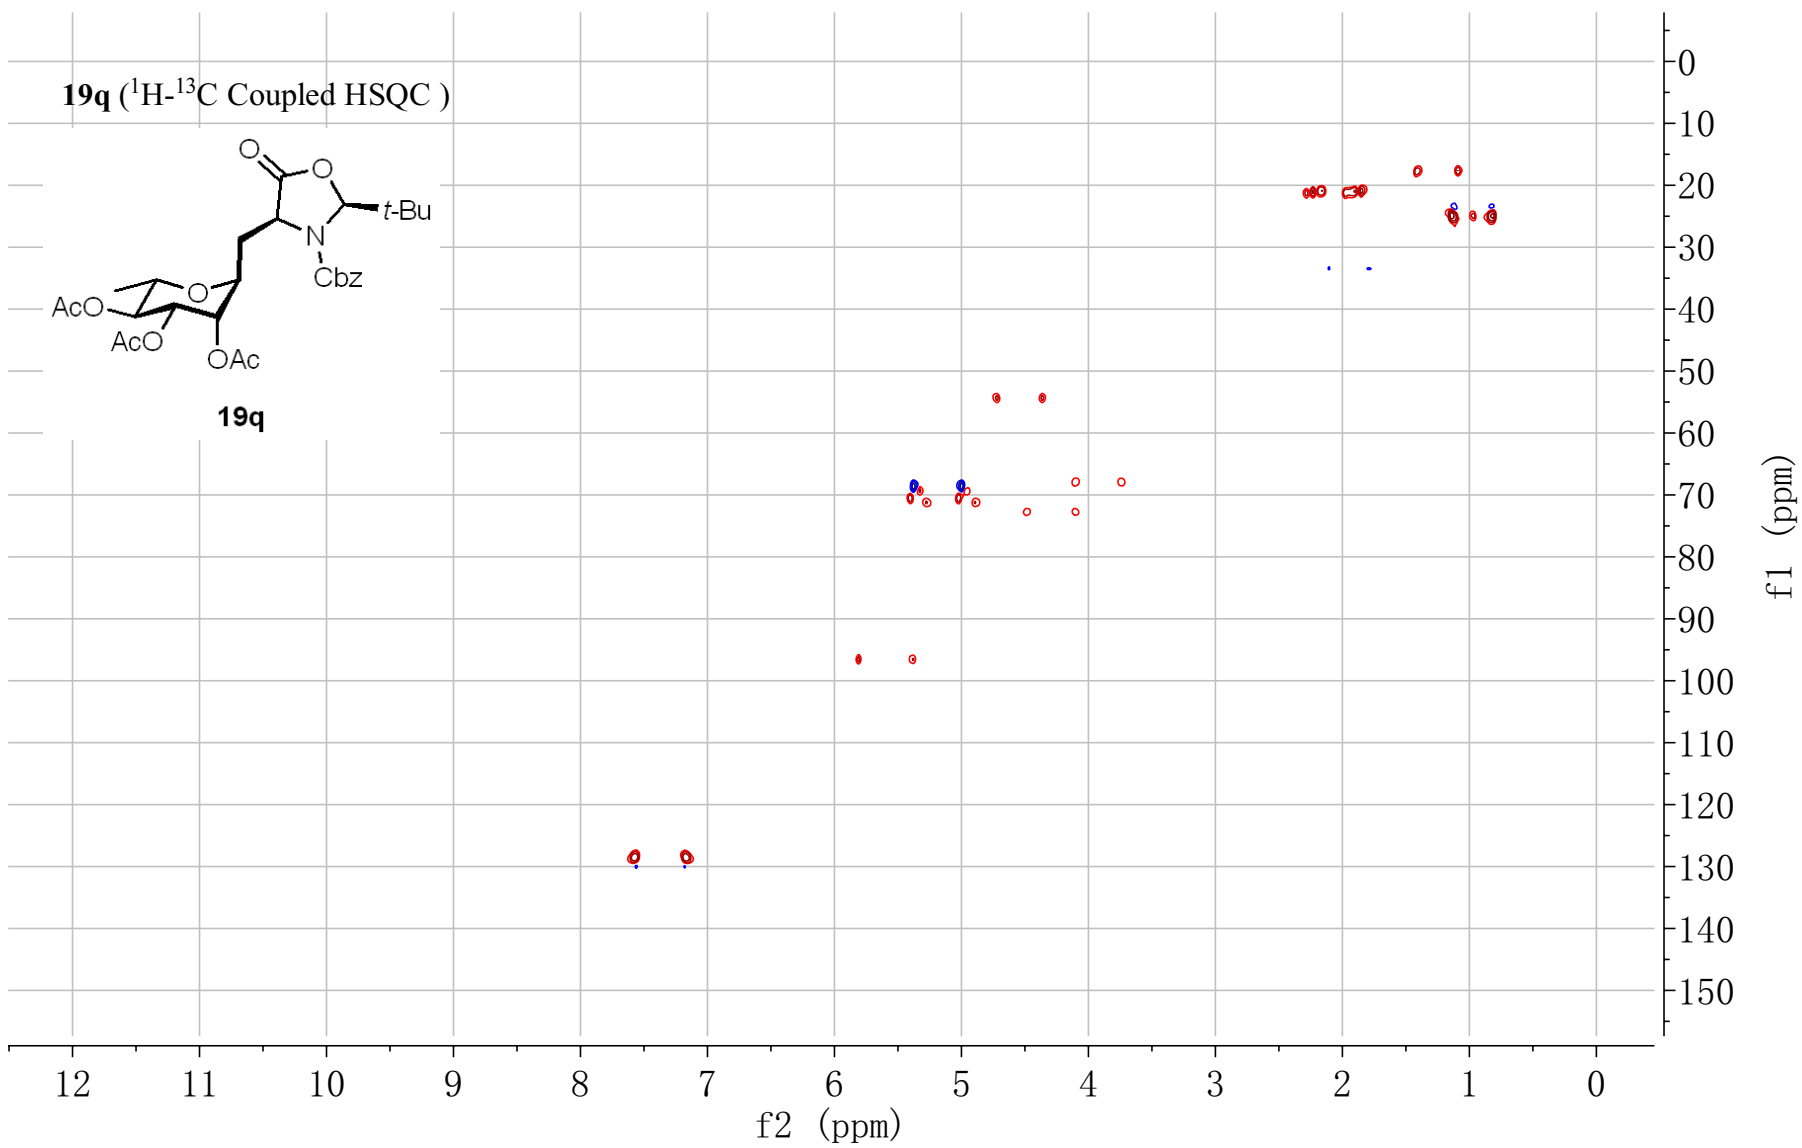

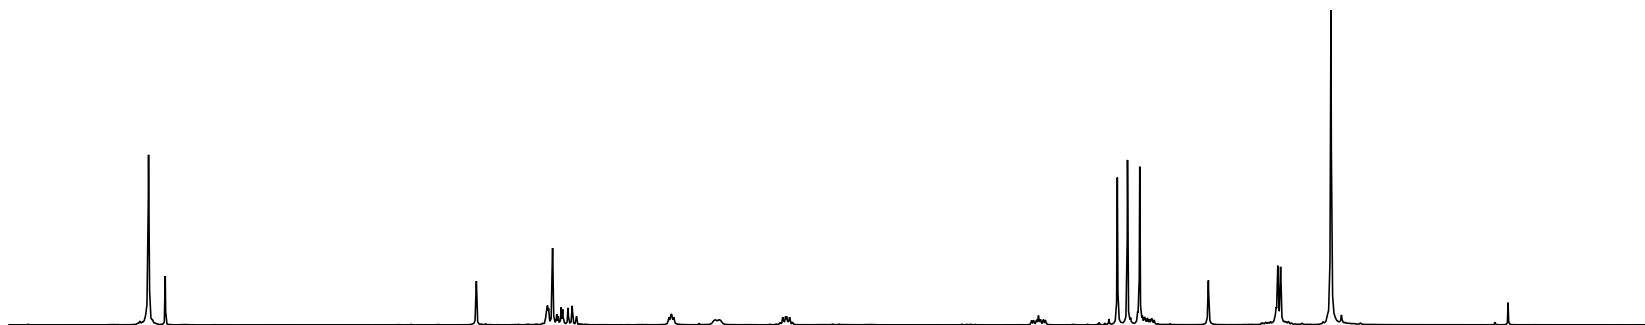

**19q** ( $^1\text{H}$ - $^{13}\text{C}$  HSQC)

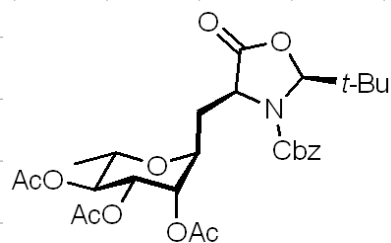

**19q**

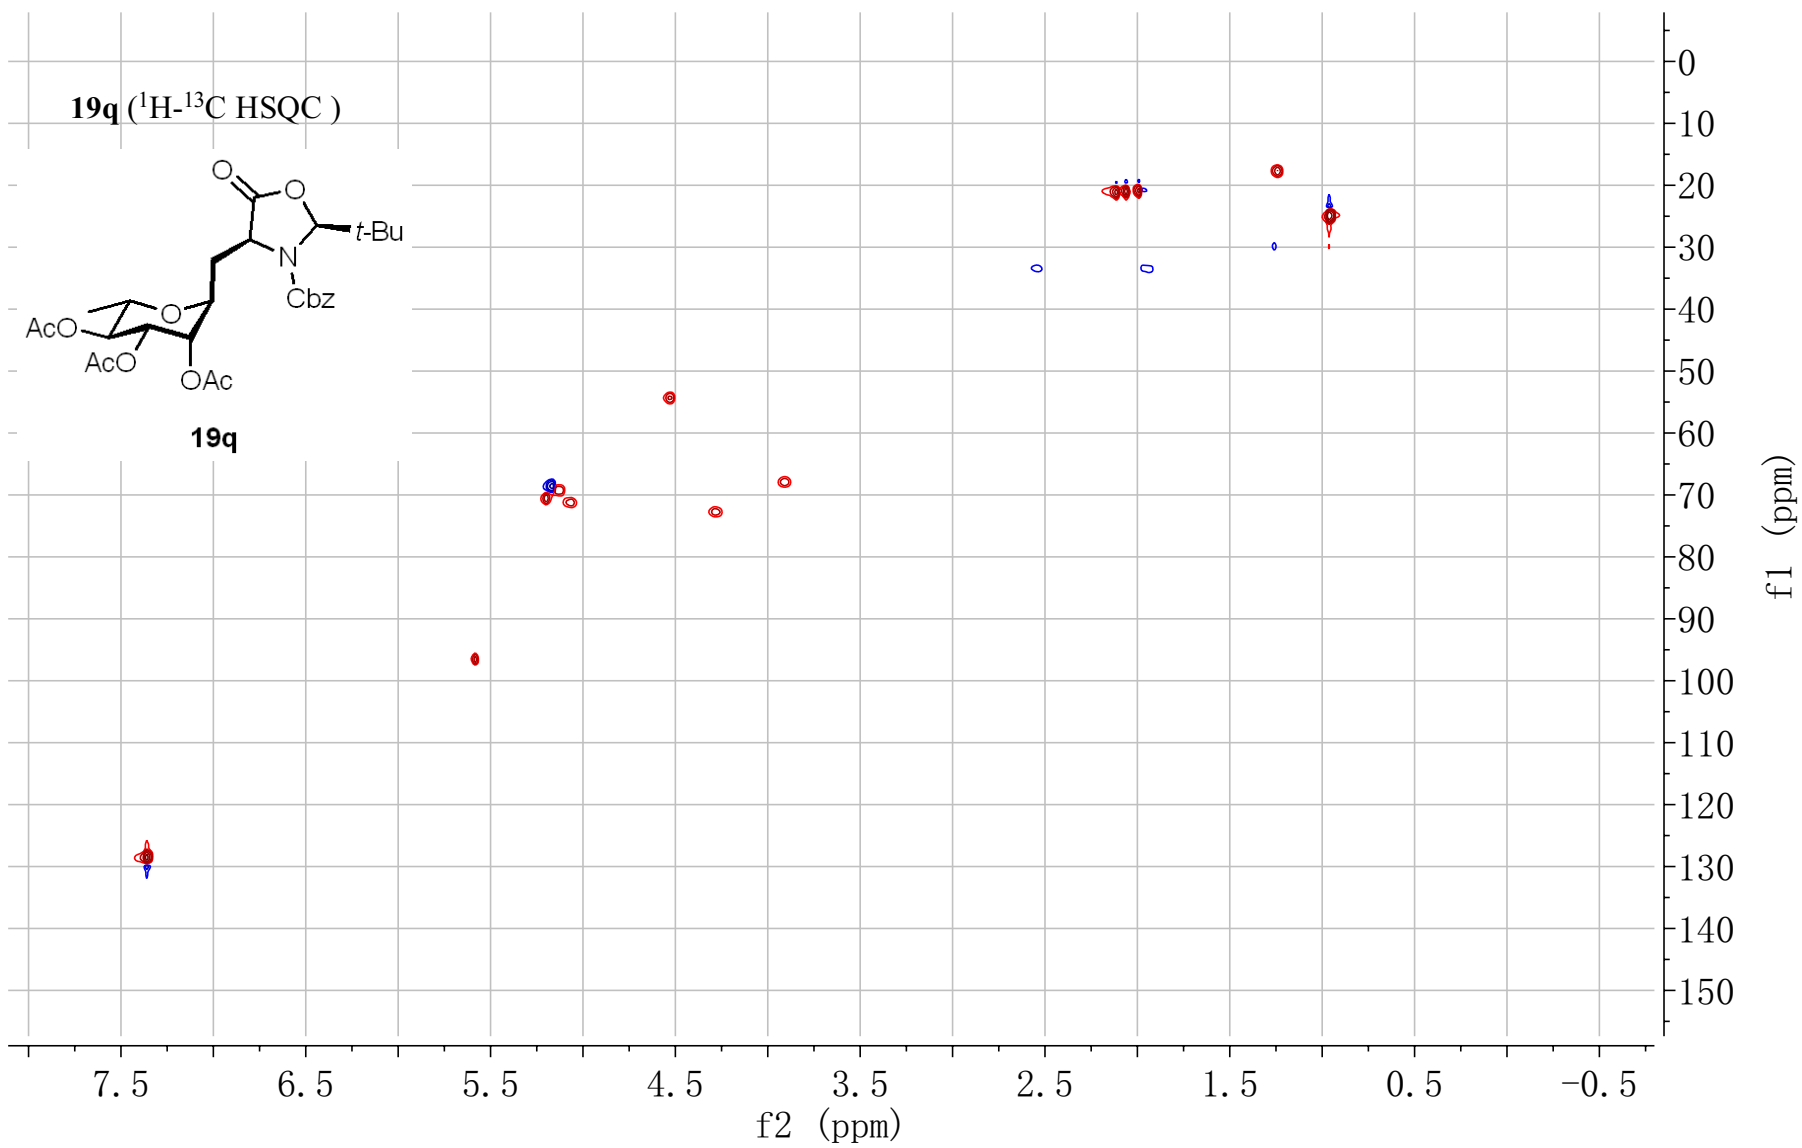

7.36  
7.35  
7.35  
7.34  
7.34  
7.33  
7.32  
7.31  
7.30  
7.29  
7.29  
7.28  
7.28  
7.27  
7.24  
7.24  
7.23  
7.23  
7.22  
7.22  
5.55  
5.18  
5.15  
5.14  
5.11  
4.83  
4.80  
4.65  
4.62  
4.60  
4.59  
4.58  
4.57  
4.55  
4.55  
4.54  
4.53  
4.51  
4.50  
4.47  
3.81  
3.80  
3.78  
3.78  
3.77  
3.76  
3.75  
3.61  
3.59  
3.58  
2.33  
2.30  
1.95  
1.89  
1.88  
1.85  
1.84  
1.83  
0.96

**19r** (<sup>1</sup>H NMR, 400MHz, CDCl<sub>3</sub>)

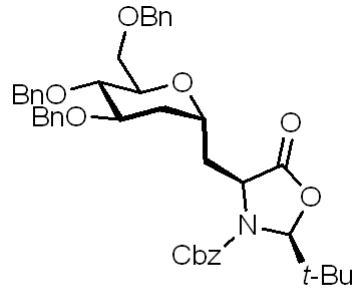

**19r**

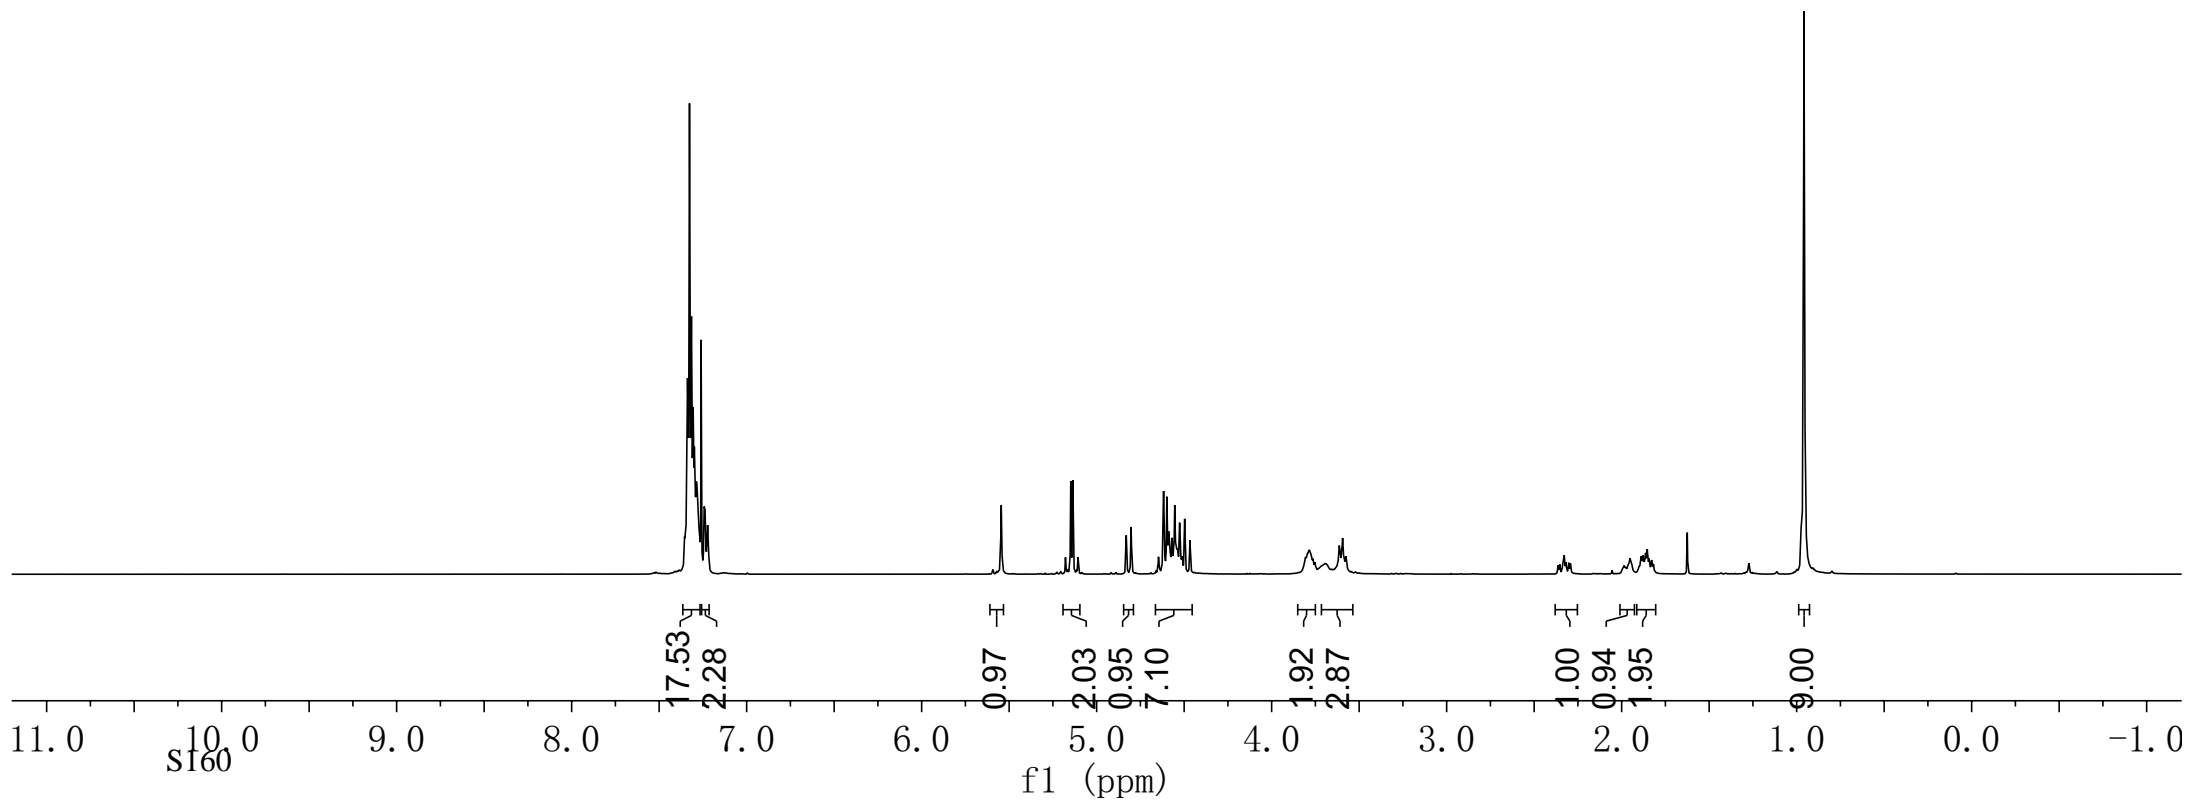



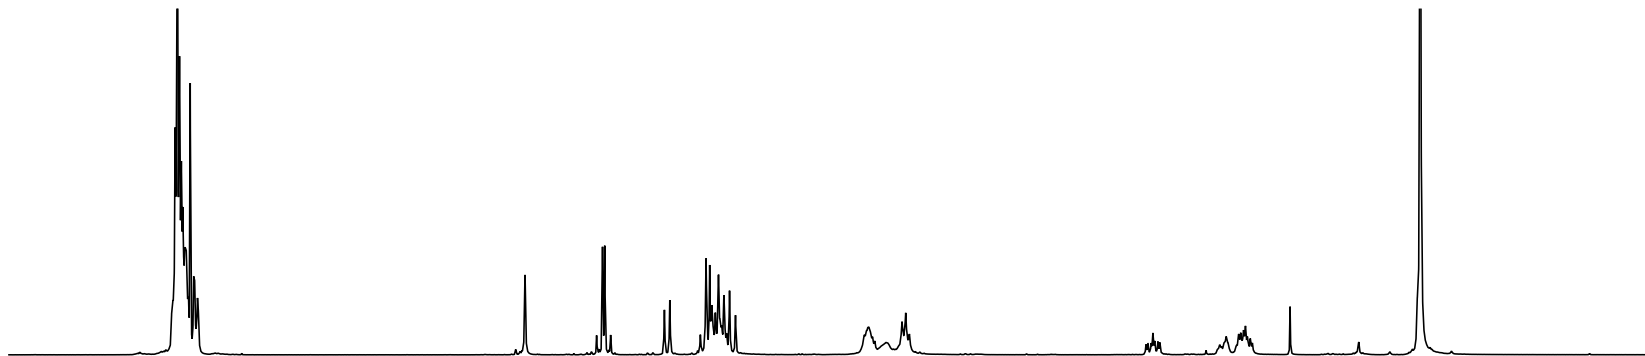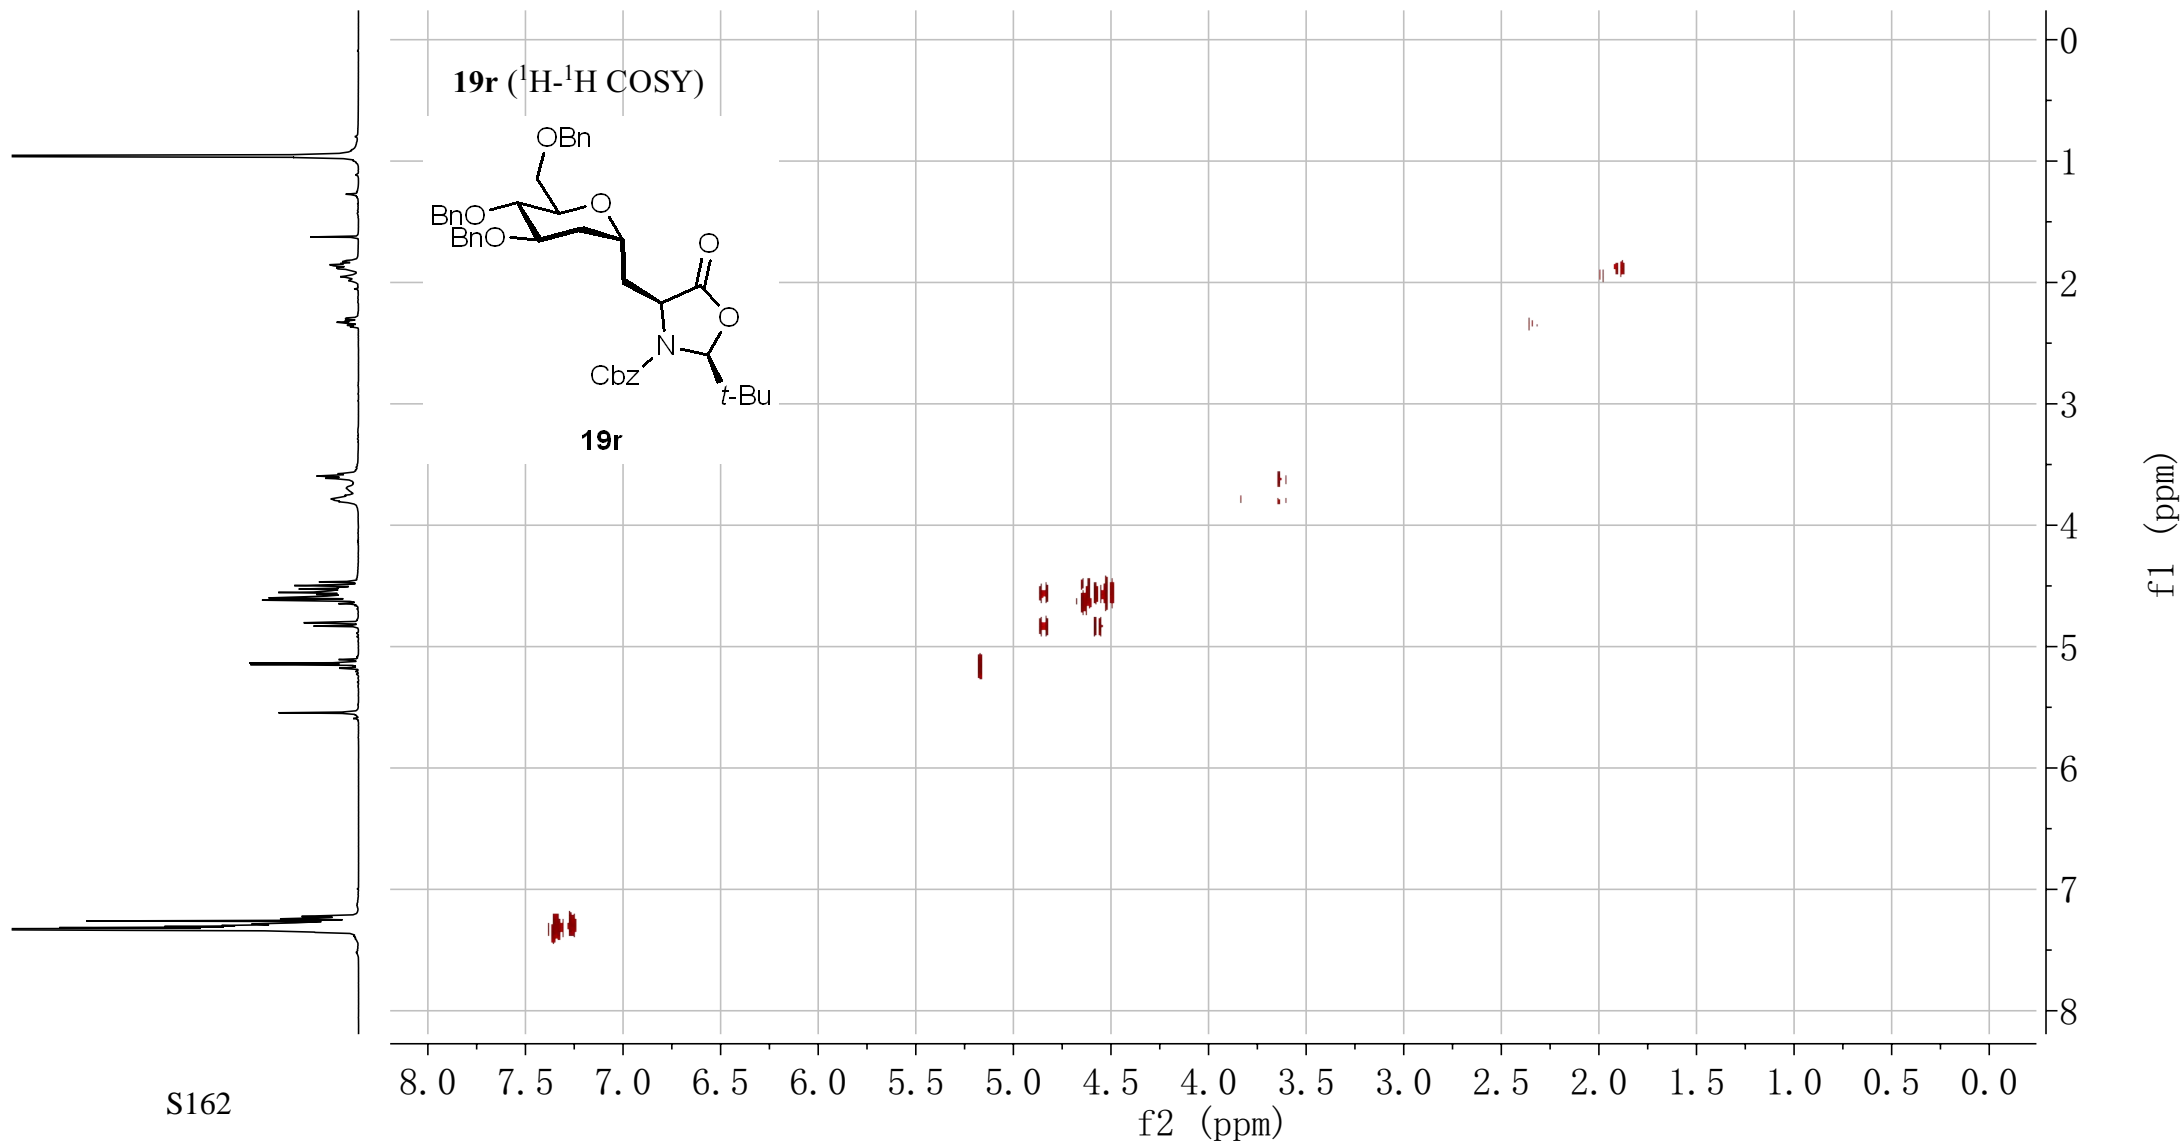

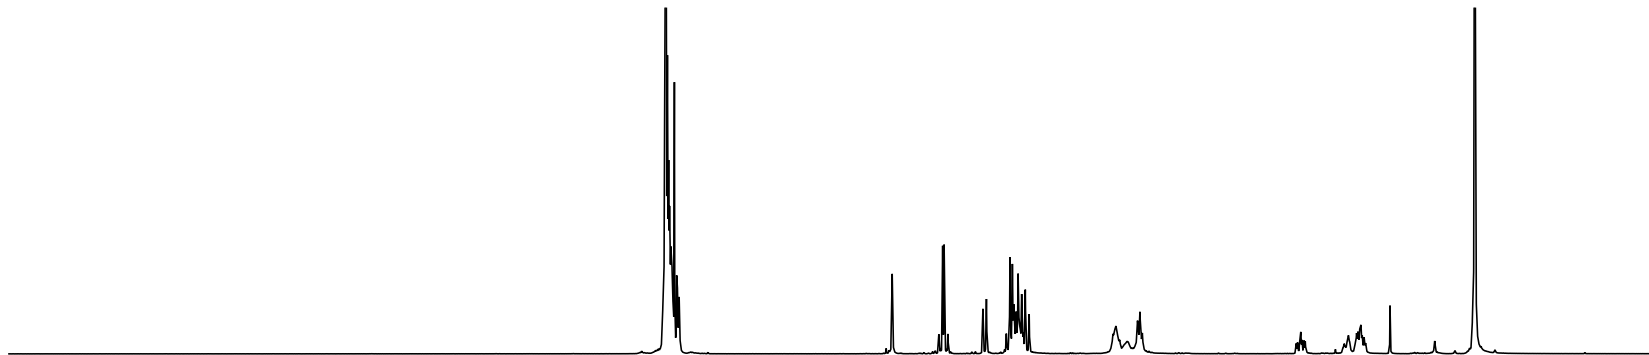

**19r** ( $^1\text{H}$ - $^{13}\text{C}$  Coupled HSQC)

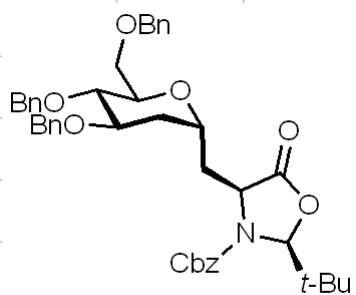

**19r**

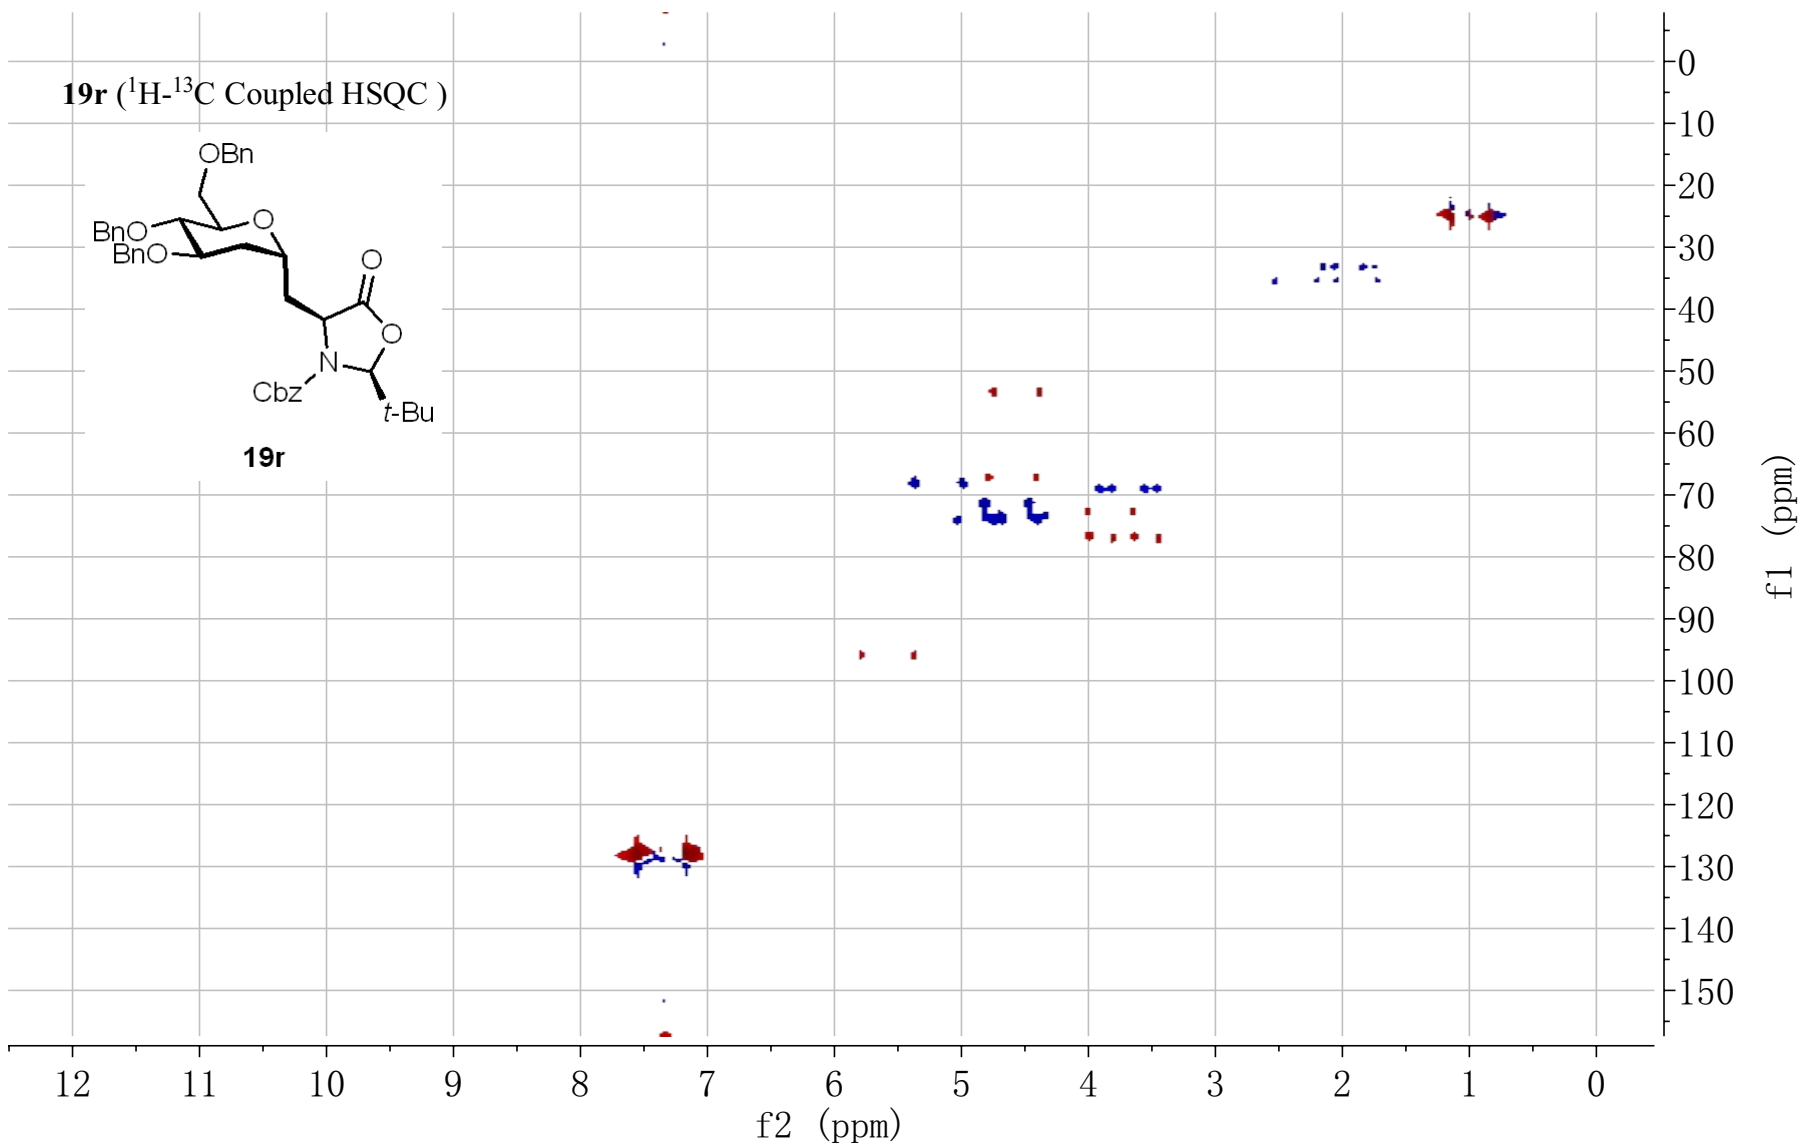

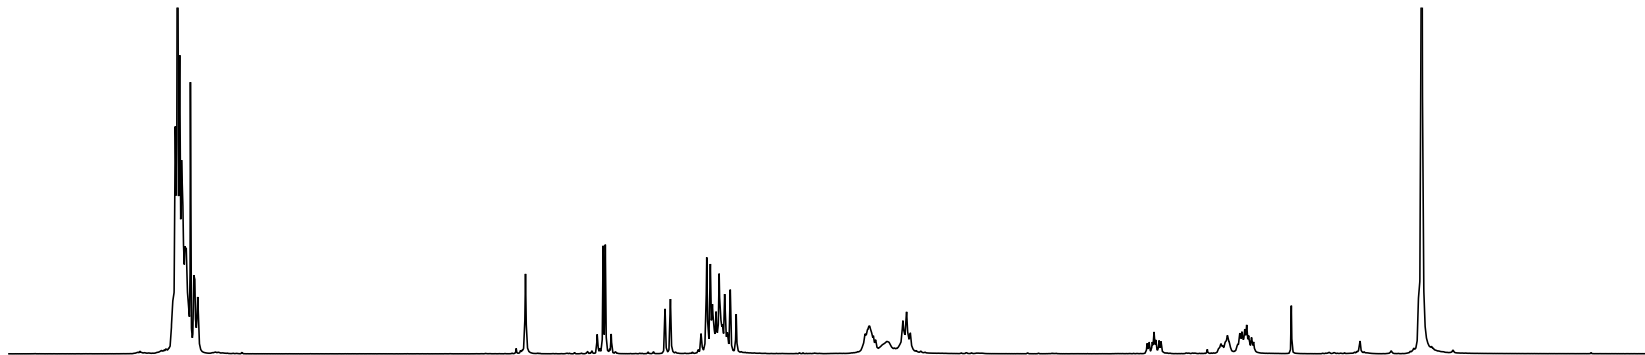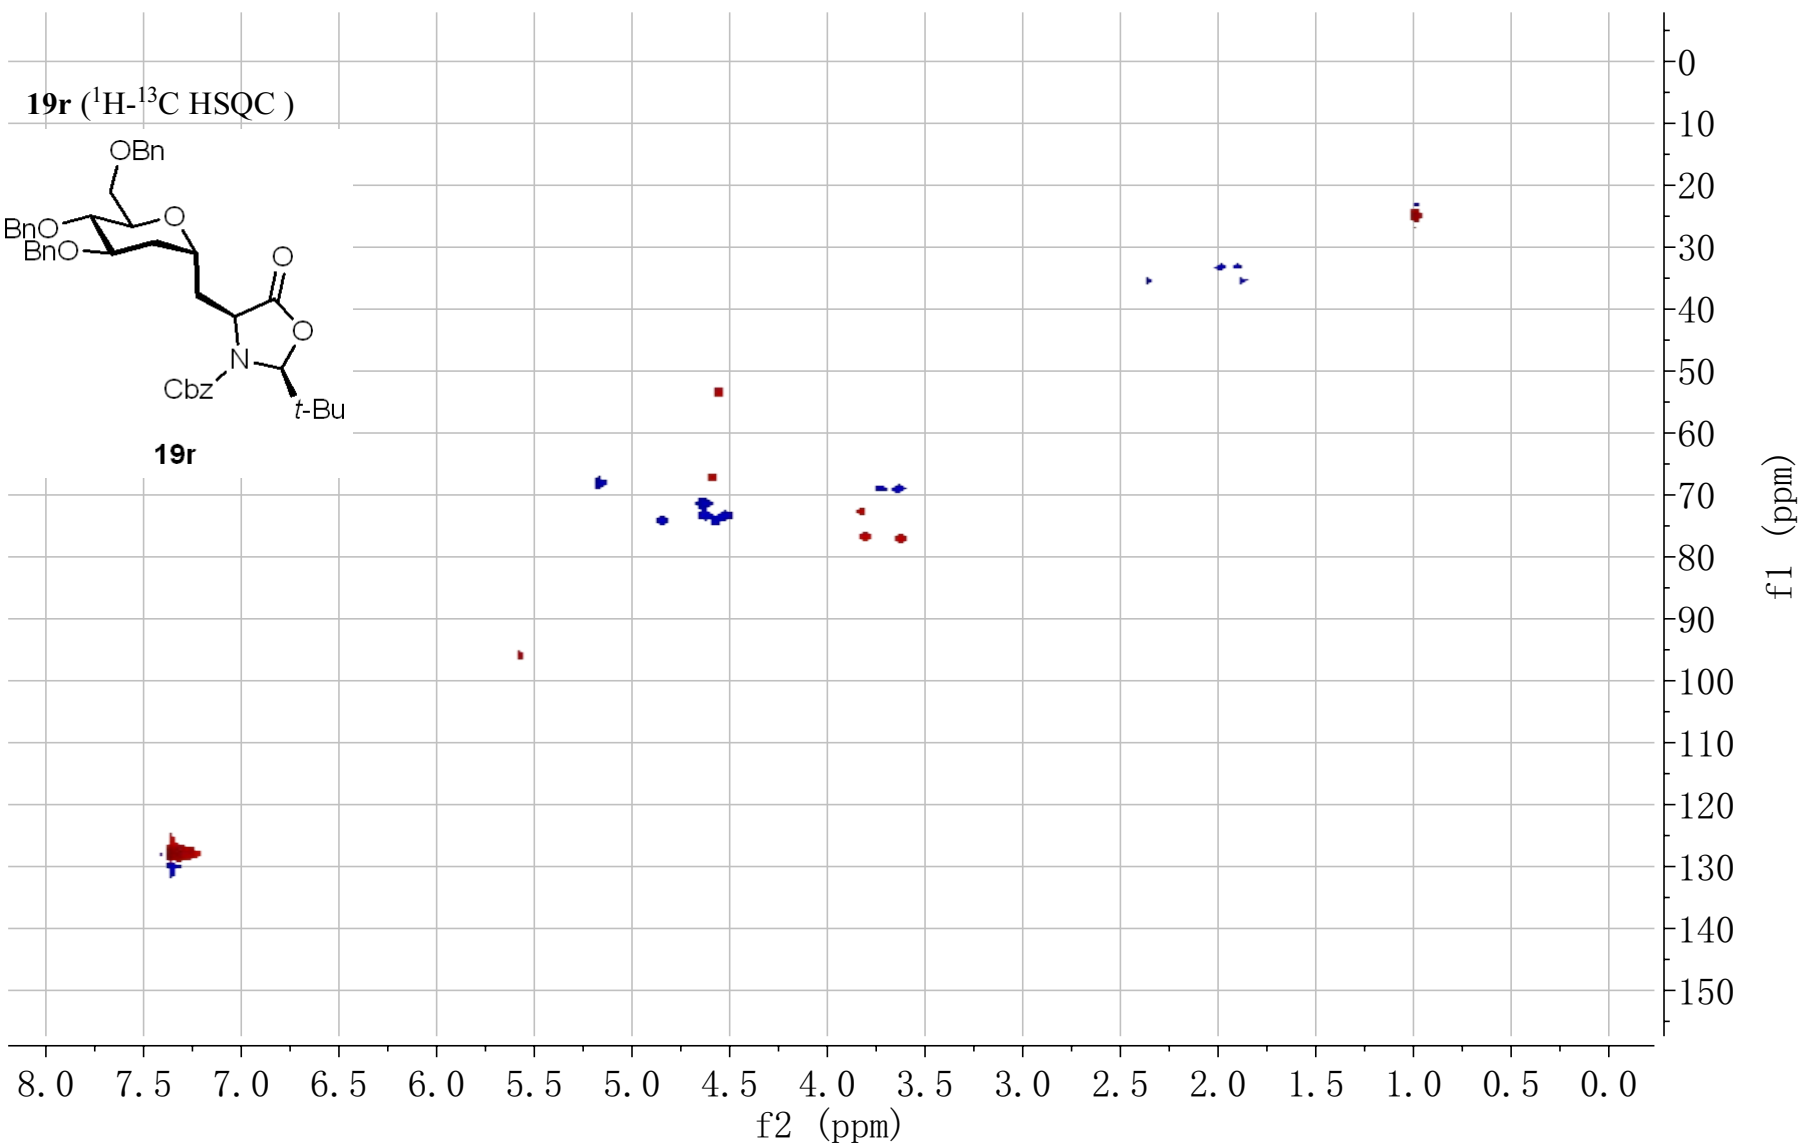

7.90  
7.89  
7.89  
7.88  
7.88  
7.87  
7.86  
7.81  
7.79  
7.79  
7.59  
7.58  
7.57  
7.40  
7.38  
7.38  
7.37  
7.37  
7.36  
7.36  
7.35  
7.34  
7.33  
7.32  
7.32  
7.31  
7.31  
7.31  
7.30  
7.29  
7.29  
7.28  
7.28  
7.27  
7.27  
7.26  
7.25  
7.24  
7.23  
7.23  
7.22  
7.22  
7.21  
7.21  
7.20  
7.20  
7.19  
7.19  
7.18  
7.18  
5.85  
5.22  
4.98  
4.50  
4.48  
4.48  
3.87  
1.01  
0.90

**19s** (<sup>1</sup>H NMR, 400MHz, CDCl<sub>3</sub>)

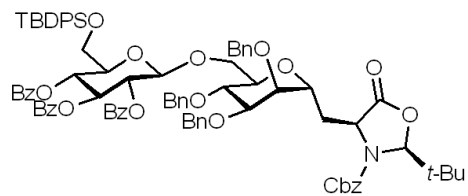

**19s**

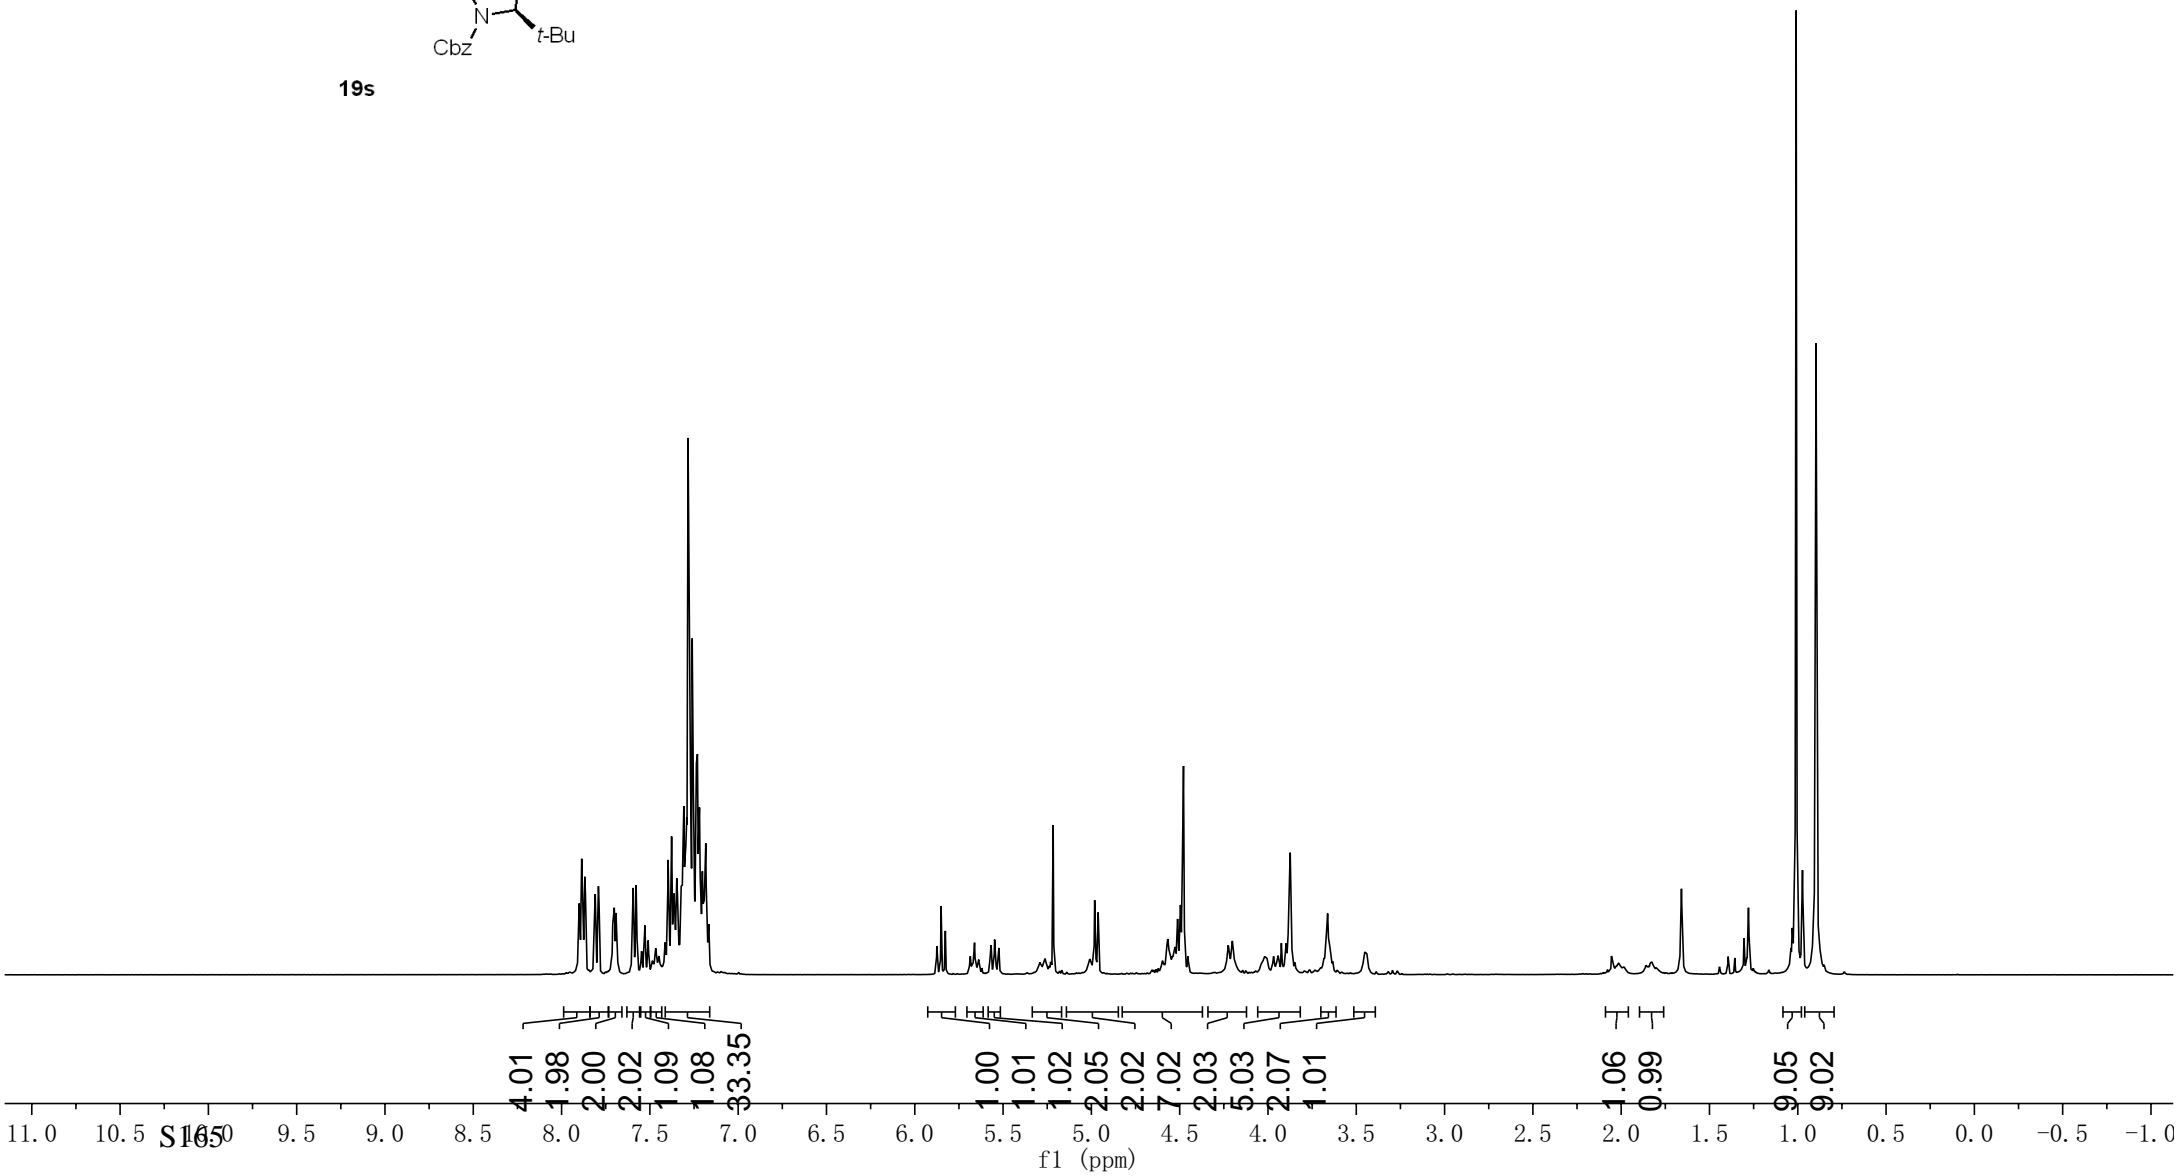

S1650



**19s** ( $^{13}\text{C}$  NMR, 101MHz,  $\text{CDCl}_3$ )

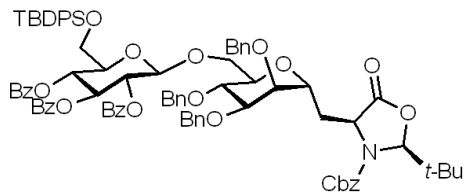

**19s**

171.90  
165.85  
165.07  
164.94

155.01  
138.33  
138.09  
137.99  
135.62  
135.51  
133.17  
133.07  
133.00  
129.82  
129.75  
129.66  
129.61  
129.32  
129.08  
128.62  
128.59  
128.37  
128.36  
128.31  
128.21  
127.89  
127.86  
127.69  
127.67  
127.63  
127.61  
101.33

95.56  
77.38  
77.06  
76.75  
75.33  
74.98  
73.50  
72.29  
72.02  
71.23  
69.42  
62.85  
37.05  
26.65  
24.88  
19.15

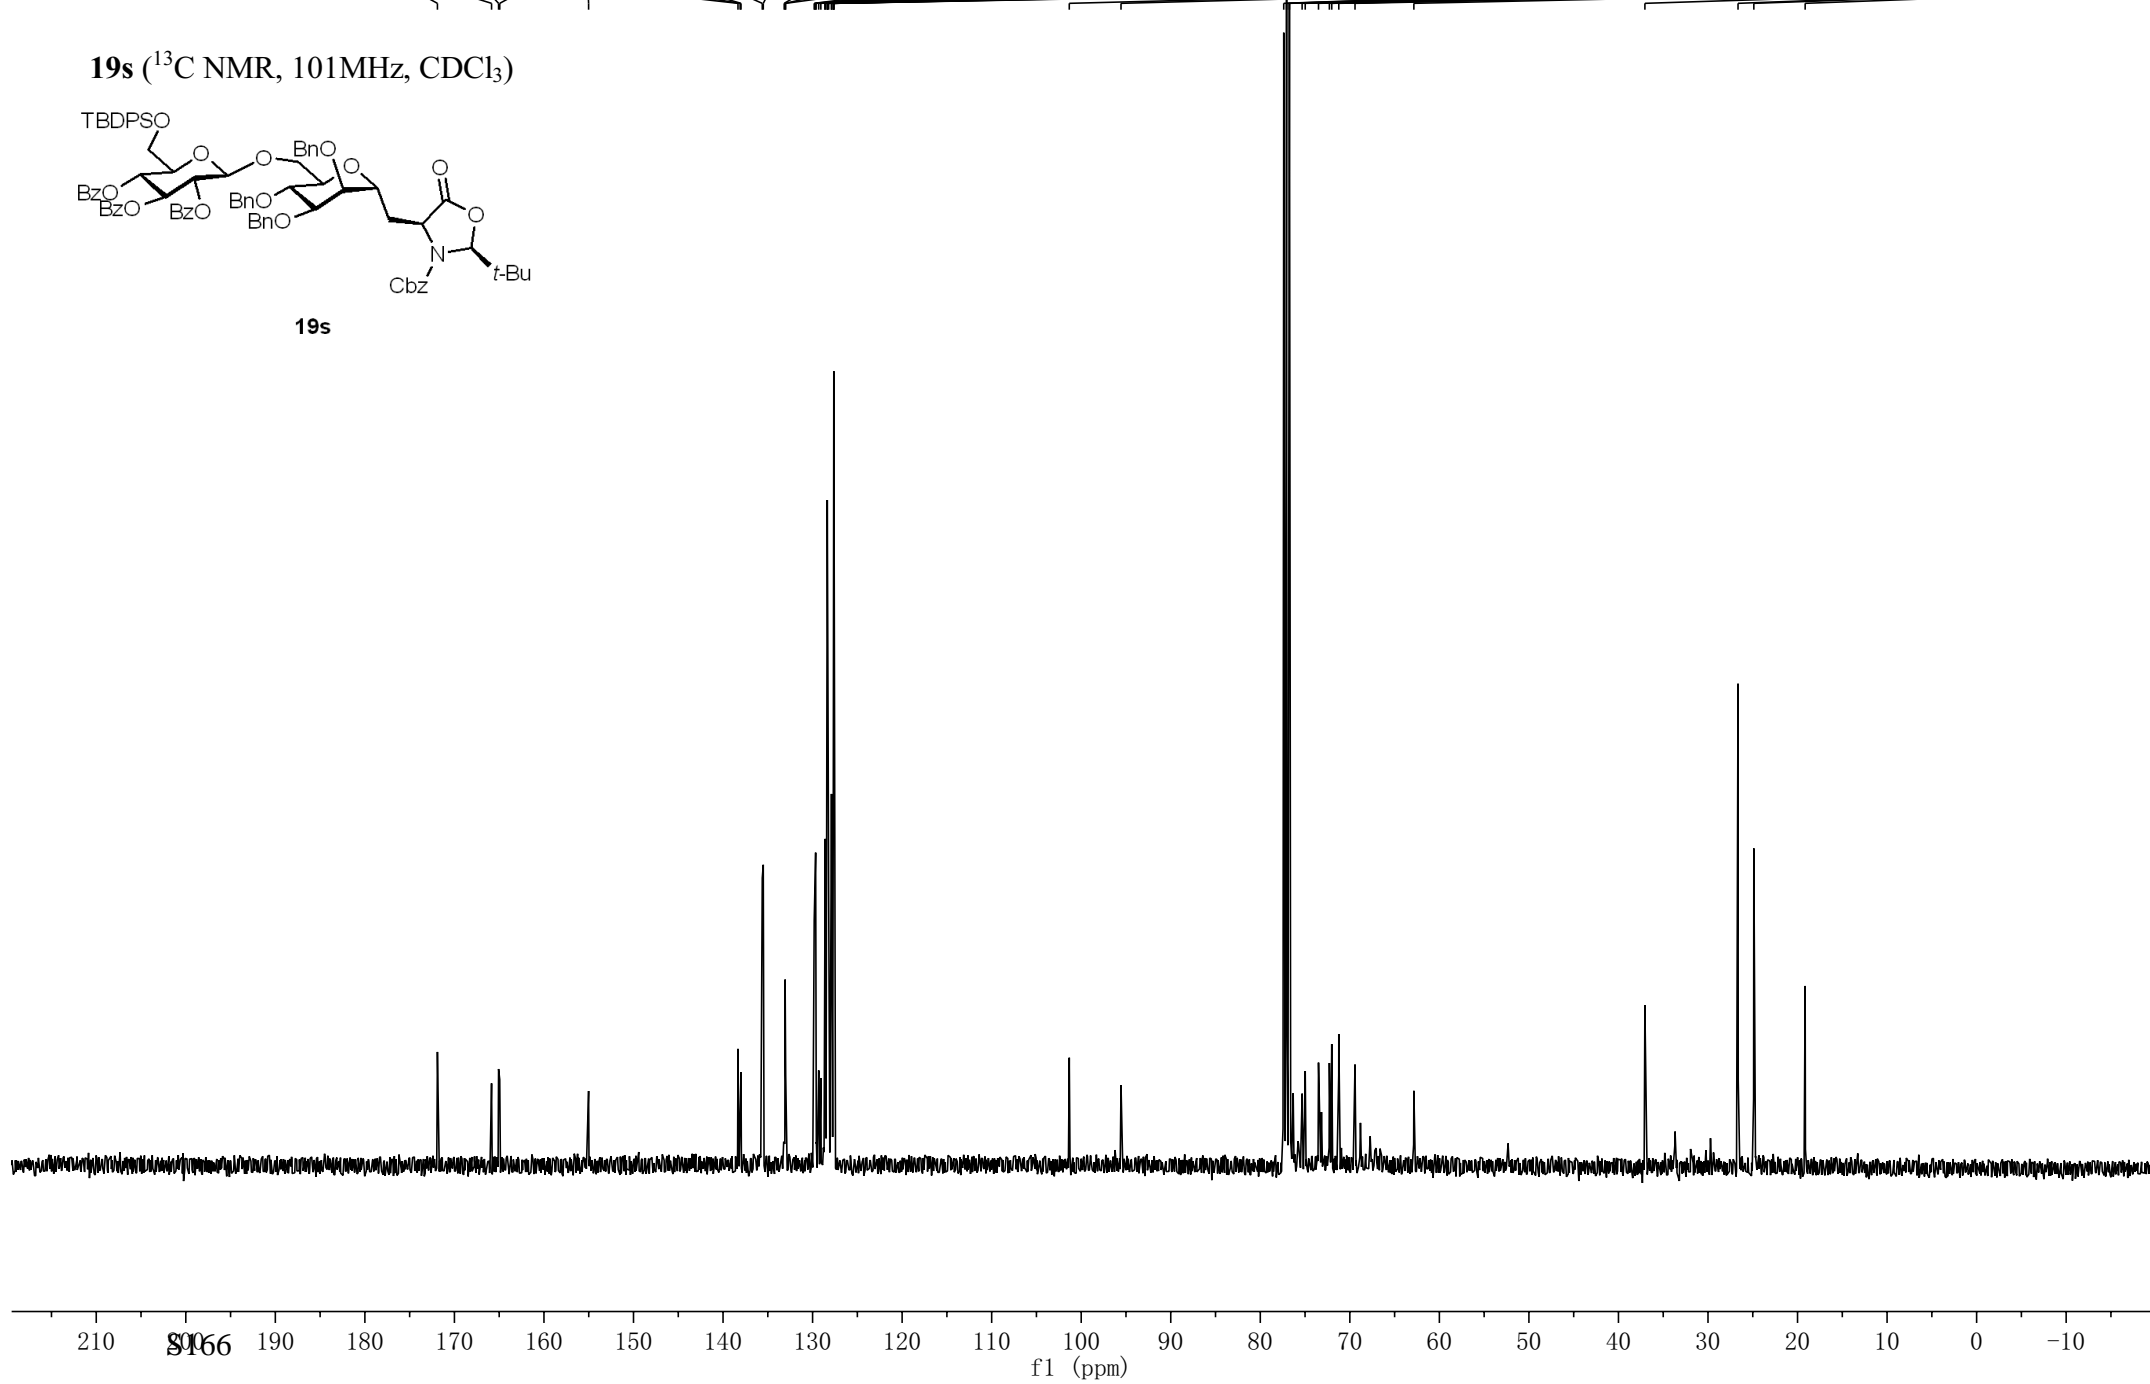

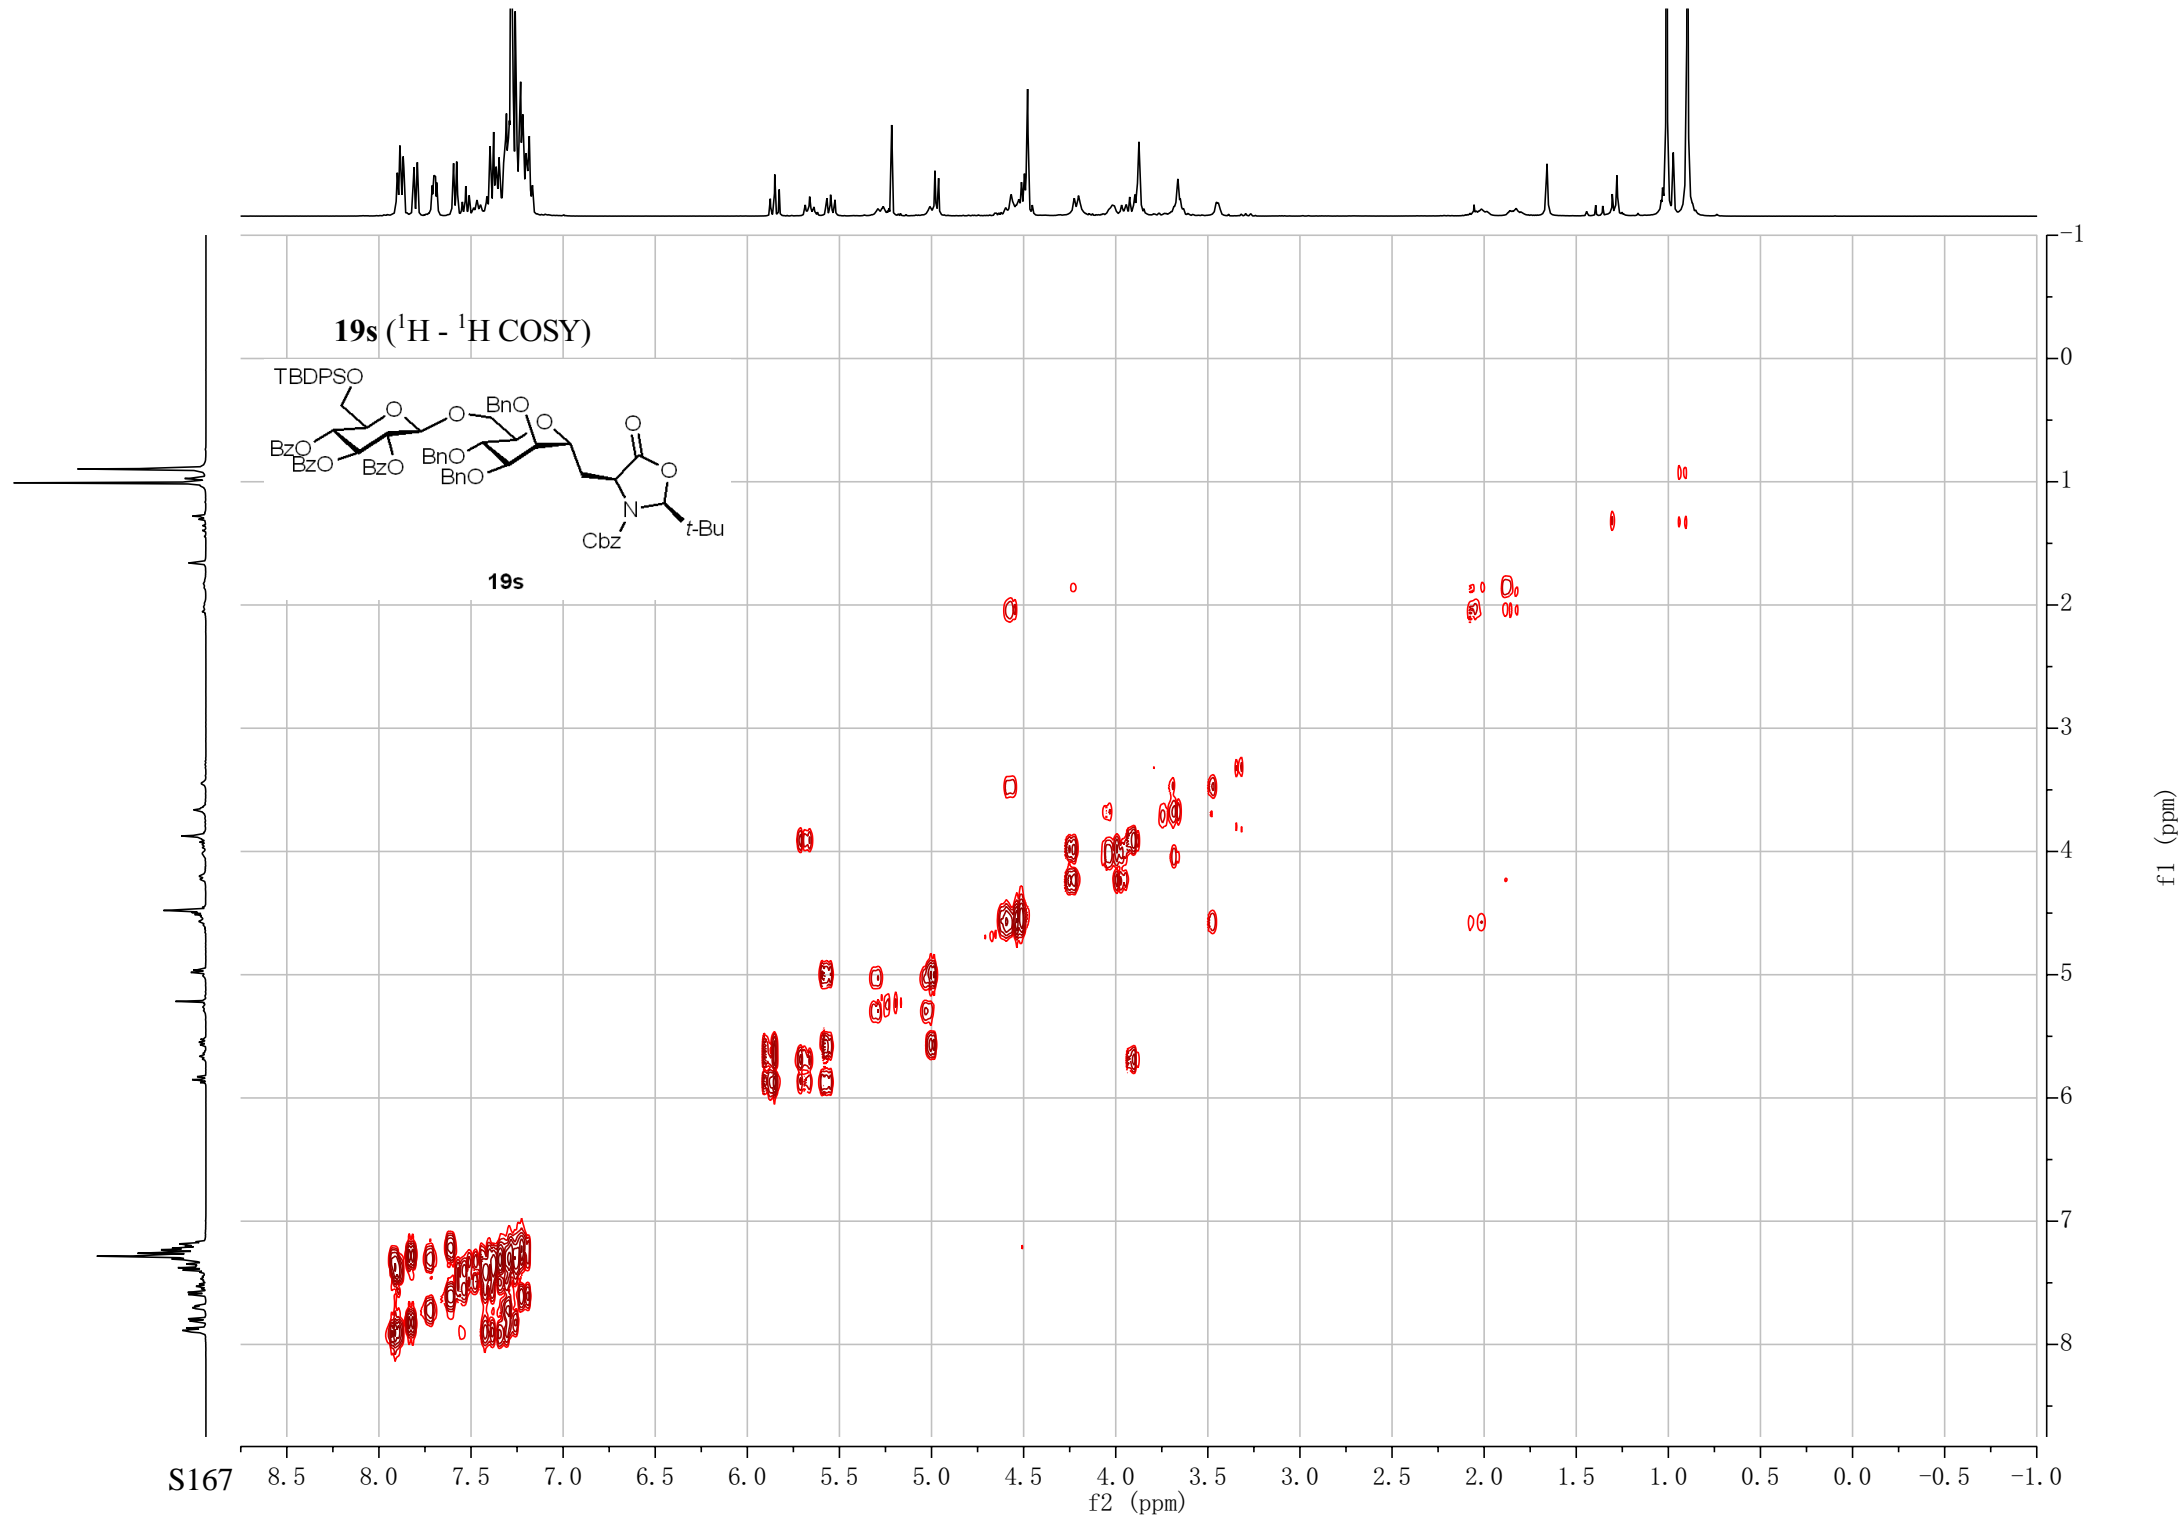

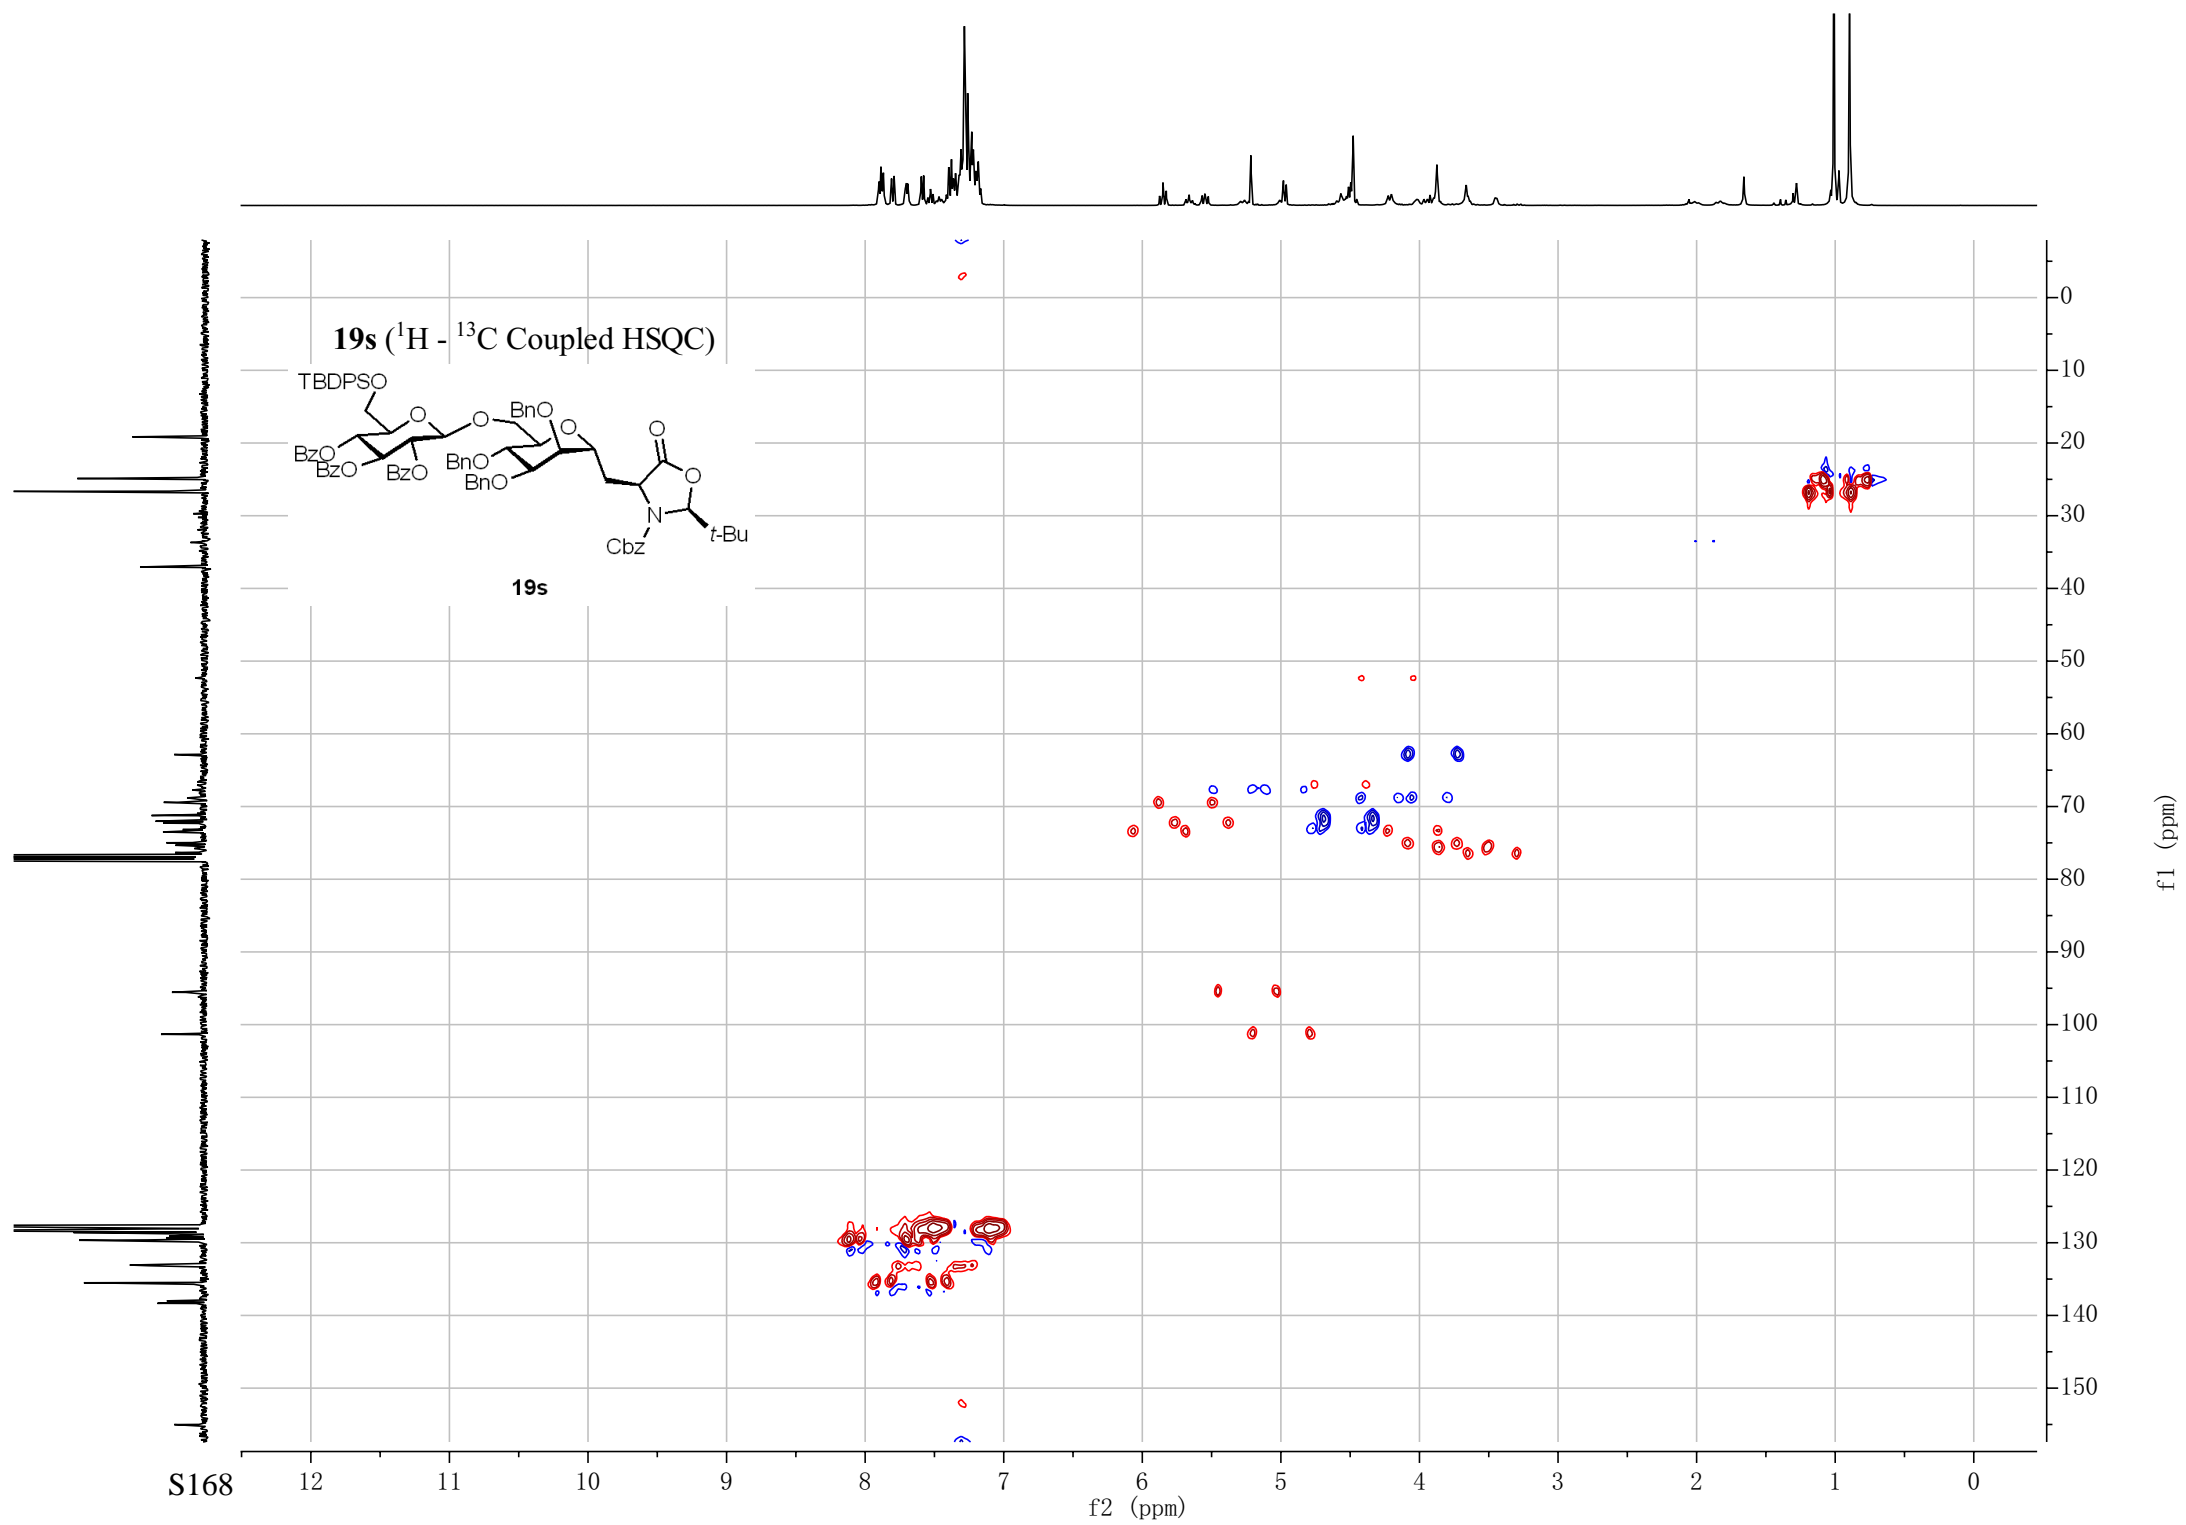

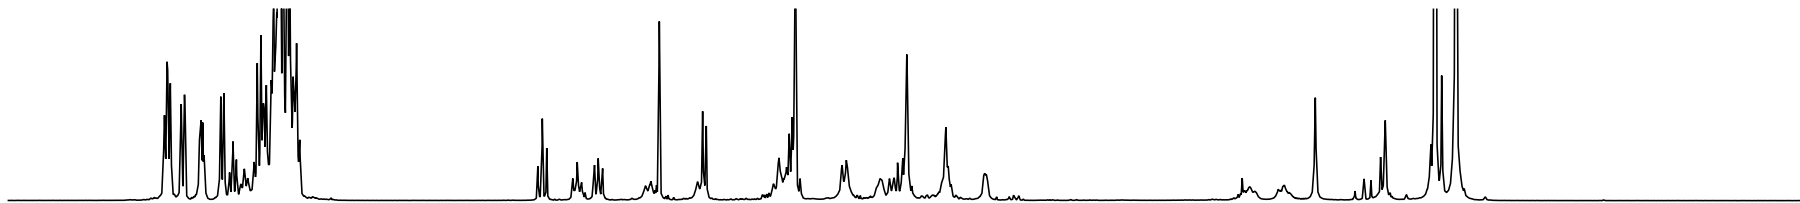

**19s** ( $^1\text{H}$  -  $^{13}\text{C}$  HSQC)

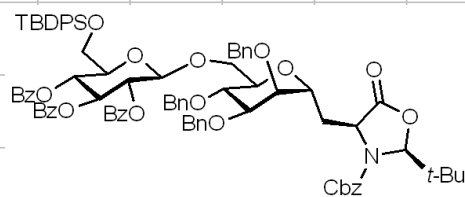

**19s**

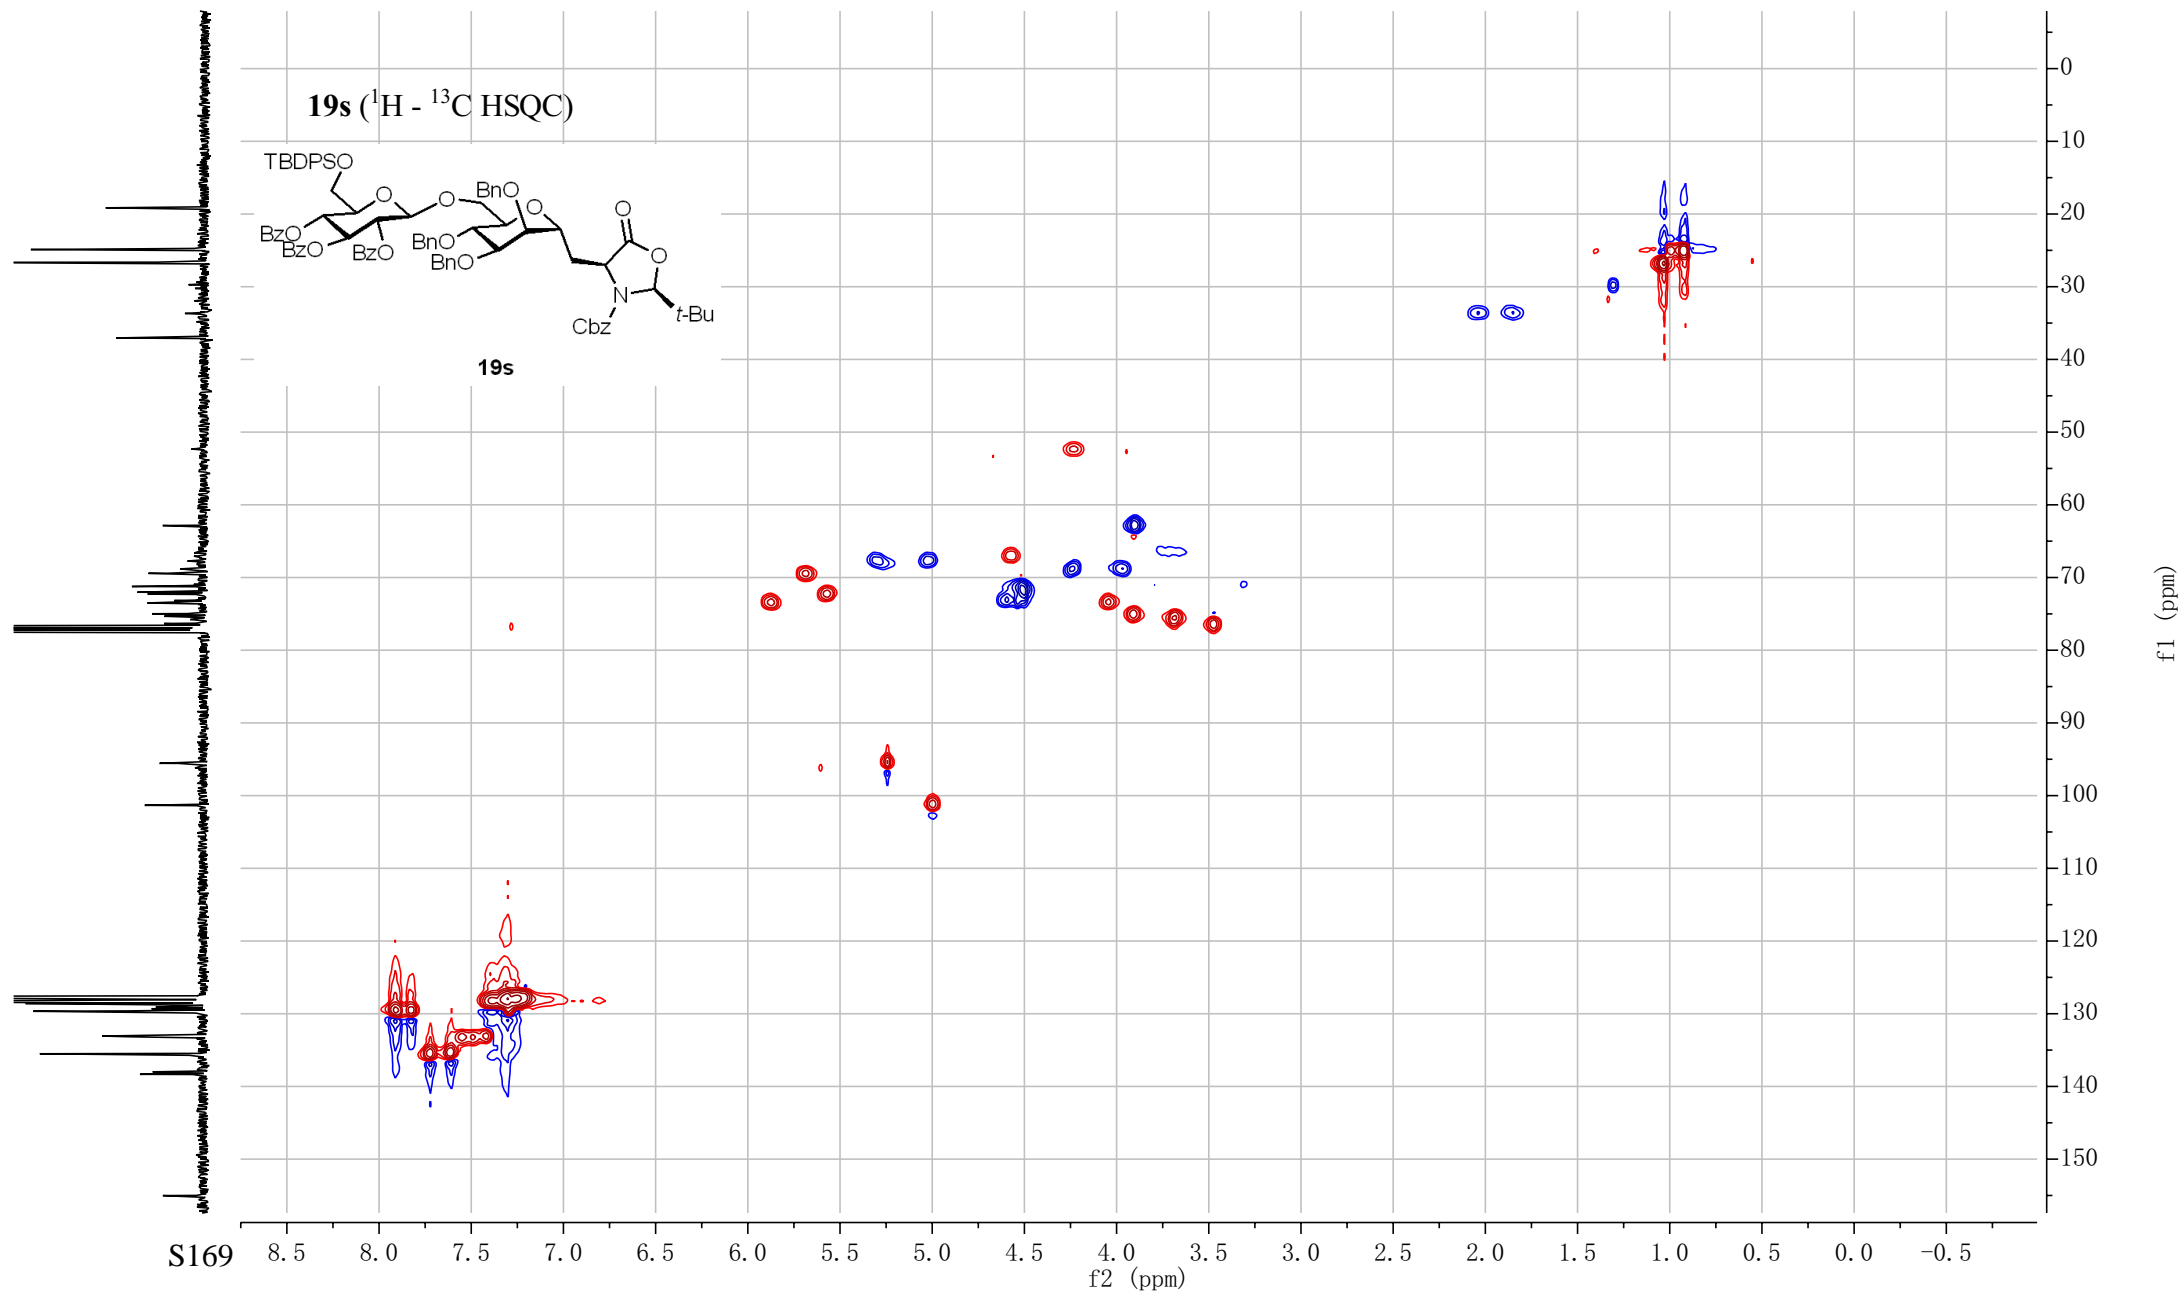

7.37  
7.35  
7.35  
7.34  
7.33  
7.32  
7.31  
7.30  
7.29  
7.28  
7.28  
7.27  
7.26  
7.26  
7.25  
7.24  
7.24  
7.23  
7.22  
7.21  
7.20  
7.19  
7.19  
7.17  
7.17  
7.16  
7.15  
7.15  
5.49  
5.03  
5.00  
4.99  
4.96  
4.79  
4.70  
4.69  
4.68  
4.68  
4.66  
4.58  
4.57  
4.55  
4.54  
4.38  
4.35  
4.32  
4.26  
4.23  
3.92  
3.91  
3.75  
3.56  
3.39  
3.36  
3.35  
-0.96  
-0.95  
-0.93  
0.88

**19t** ( $^1\text{H}$  NMR, 400MHz,  $\text{CDCl}_3$ )

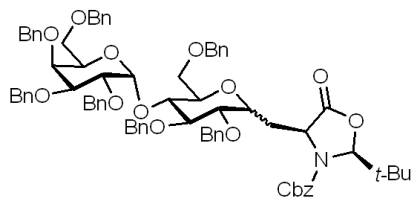

**19t, major  $\alpha$**

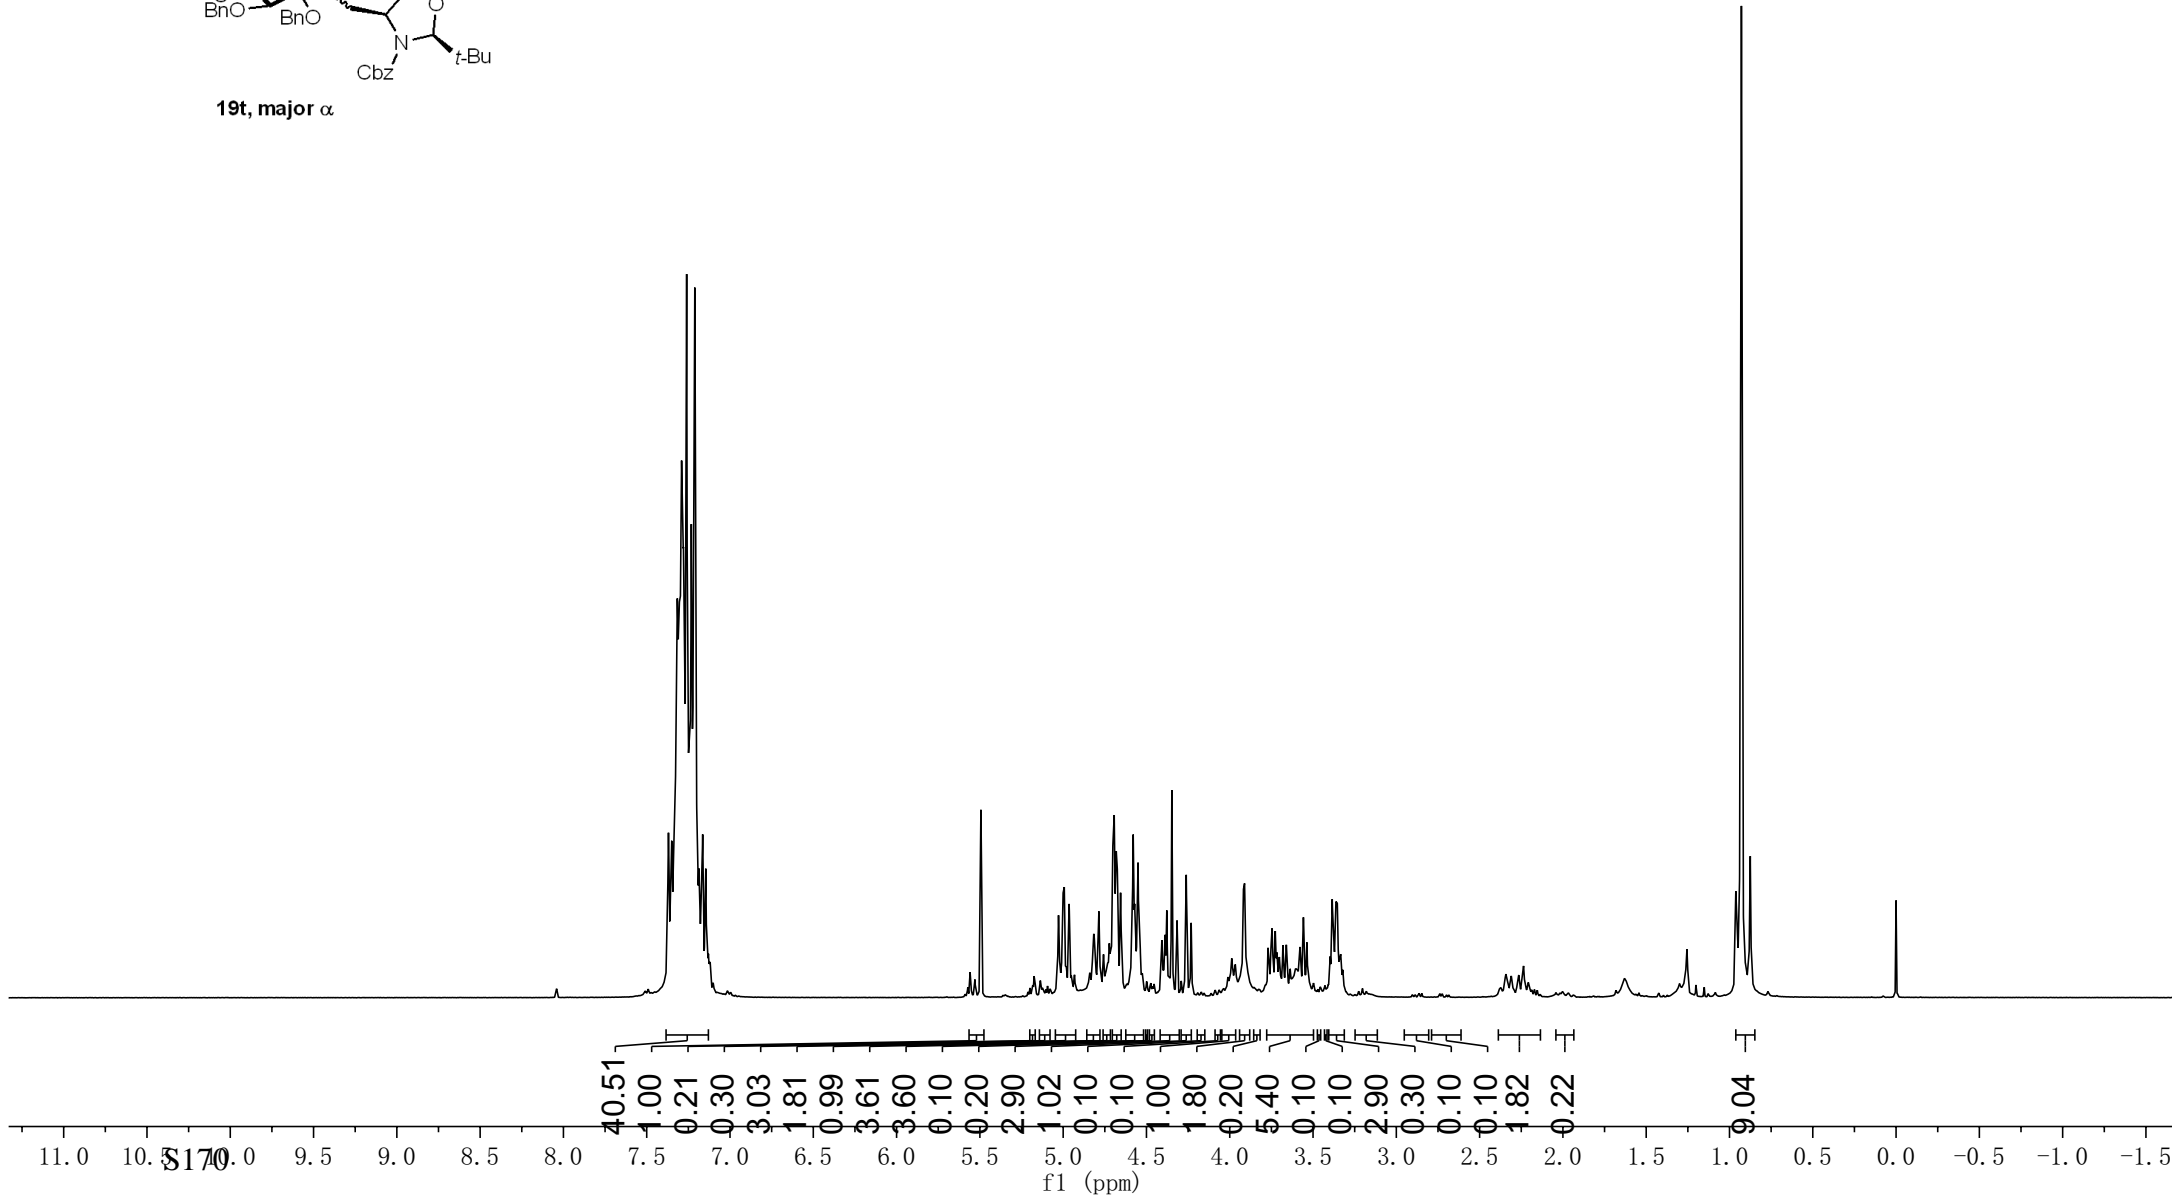

11.0 10.5 10.0 9.5 9.0 8.5 8.0 7.5 7.0 6.5 6.0 5.5 5.0 4.5 4.0 3.5 3.0 2.5 2.0 1.5 1.0 0.5 0.0 -0.5 -1.0 -1.5

172.53  
 155.47  
 139.45  
 139.19  
 138.98  
 138.62  
 138.42  
 138.32  
 138.23  
 128.81  
 128.76  
 128.66  
 128.50  
 128.46  
 128.41  
 128.38  
 128.32  
 128.28  
 128.26  
 128.20  
 128.13  
 128.09  
 127.99  
 127.98  
 127.94  
 127.88  
 127.86  
 127.82  
 127.81  
 127.77  
 127.74  
 127.63  
 127.61  
 127.55  
 127.52  
 127.46  
 127.17  
 103.06  
 95.98  
 82.64  
 80.14  
 79.97  
 78.47  
 76.97  
 75.15  
 74.82  
 73.73  
 73.53  
 73.28  
 73.07  
 72.68  
 71.93  
 69.90  
 68.59  
 68.25  
 52.98  
 37.29  
 28.75  
 24.98

**19t** ( $^{13}\text{C}$  NMR, 101MHz,  $\text{CDCl}_3$ )

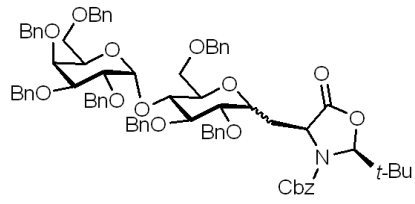

**19t, major  $\alpha$**

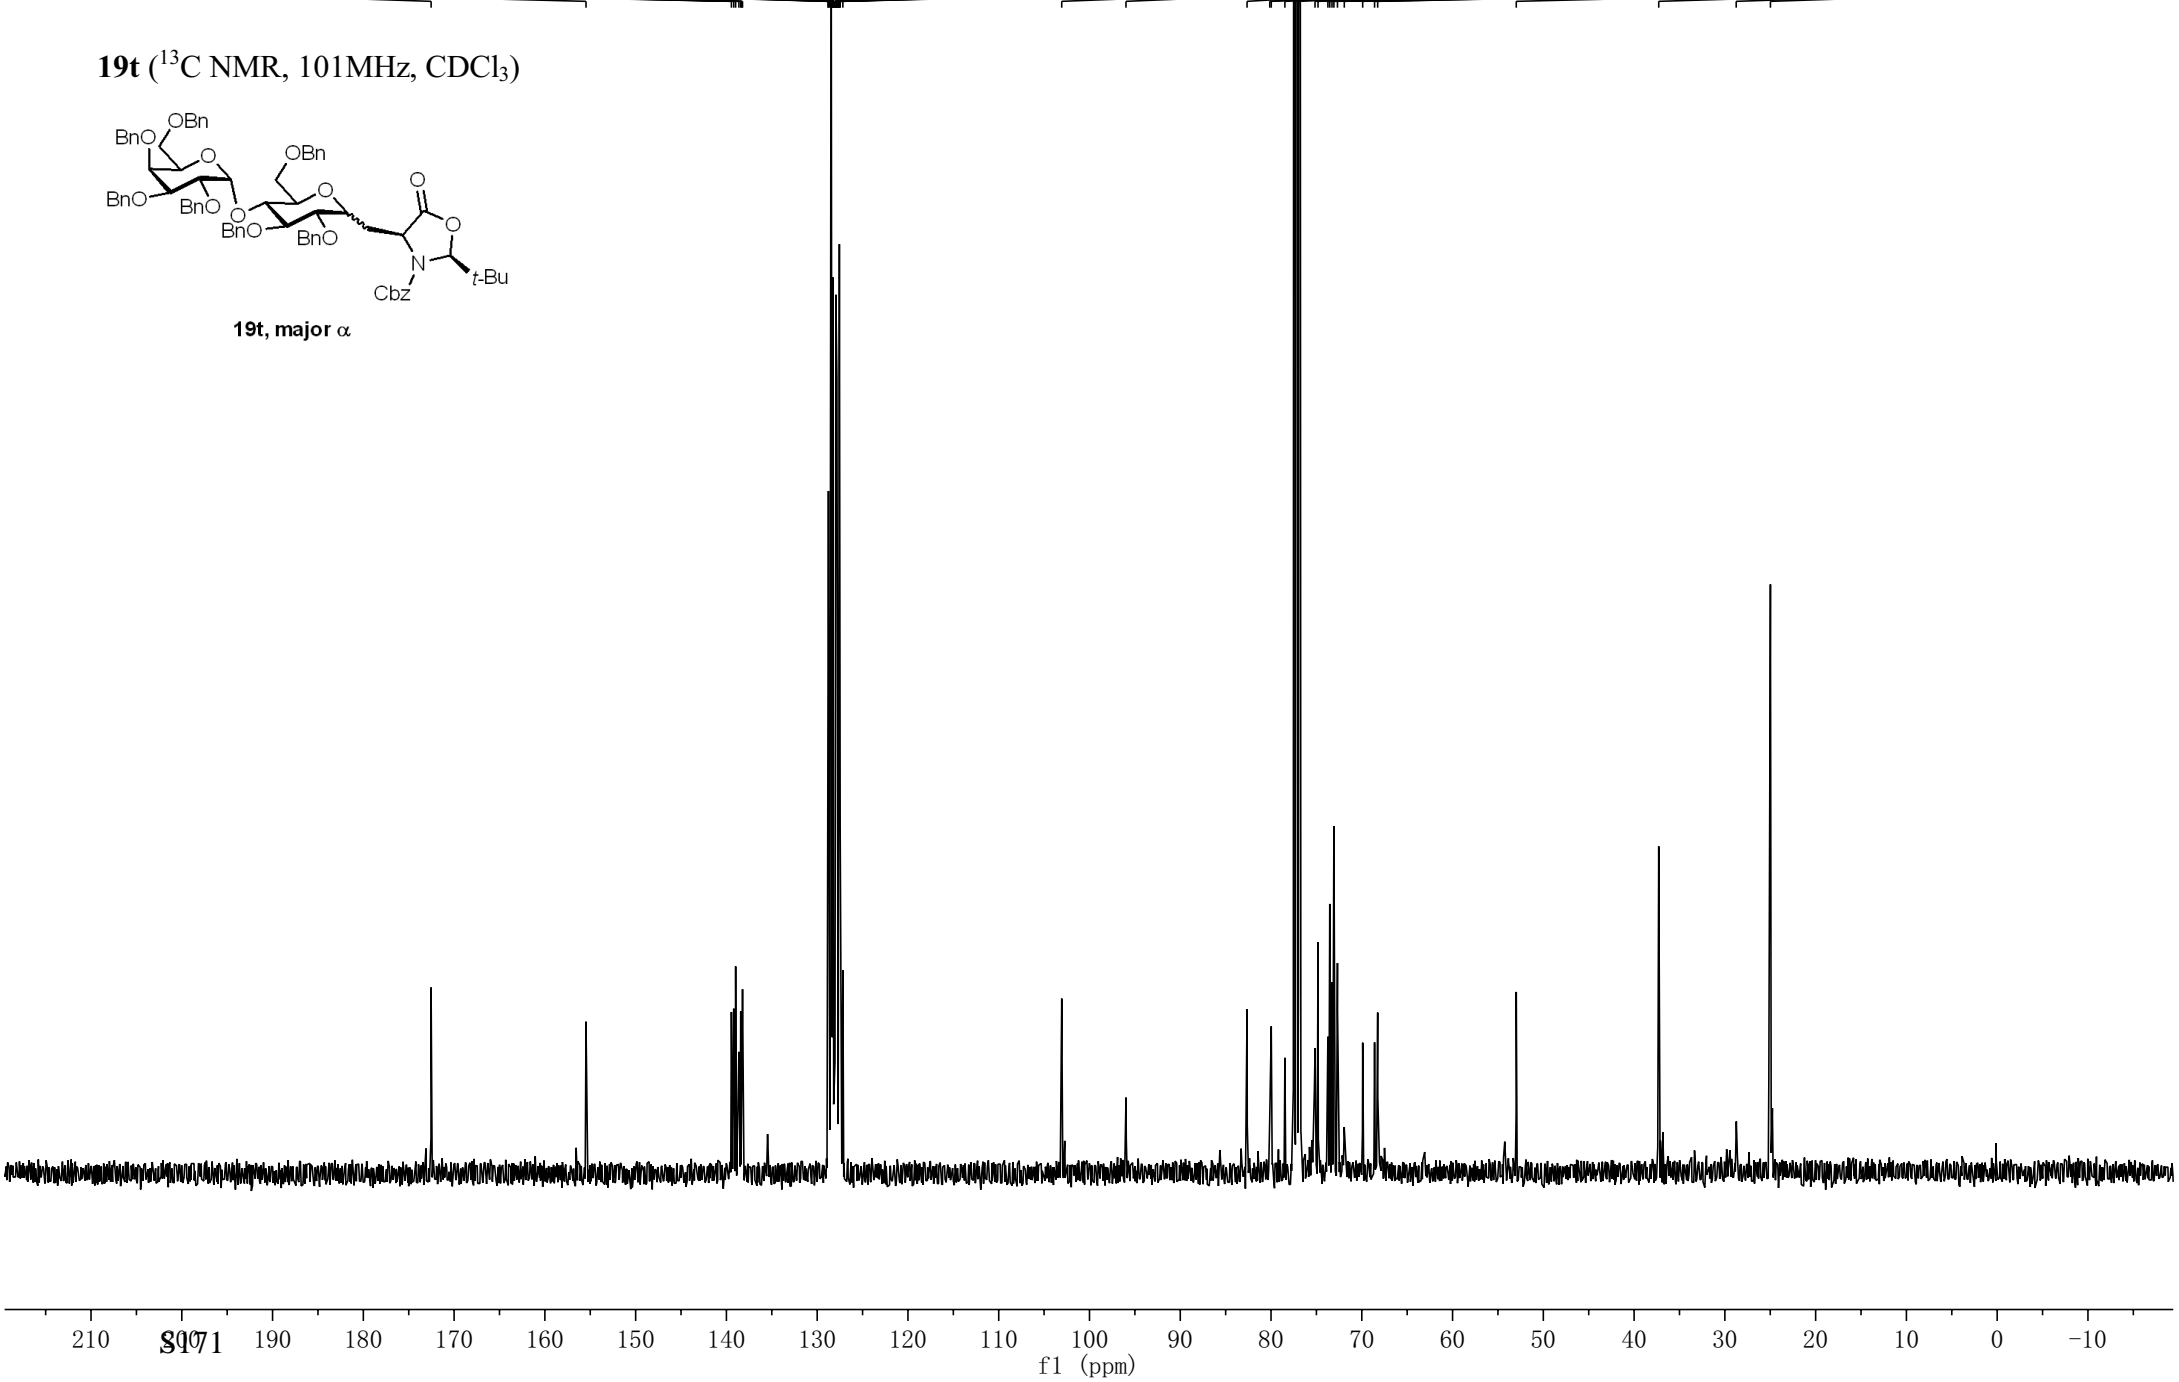

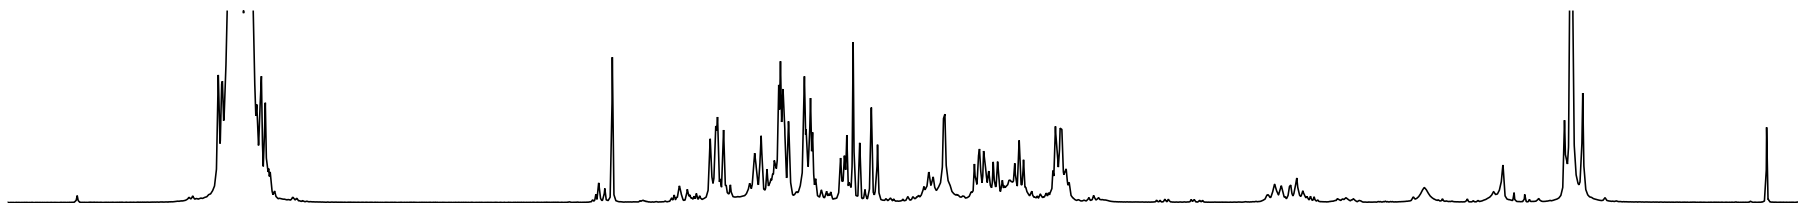

**19t** (<sup>1</sup>H - <sup>1</sup>H COSY)

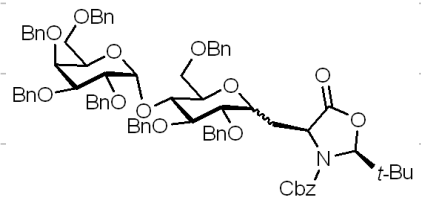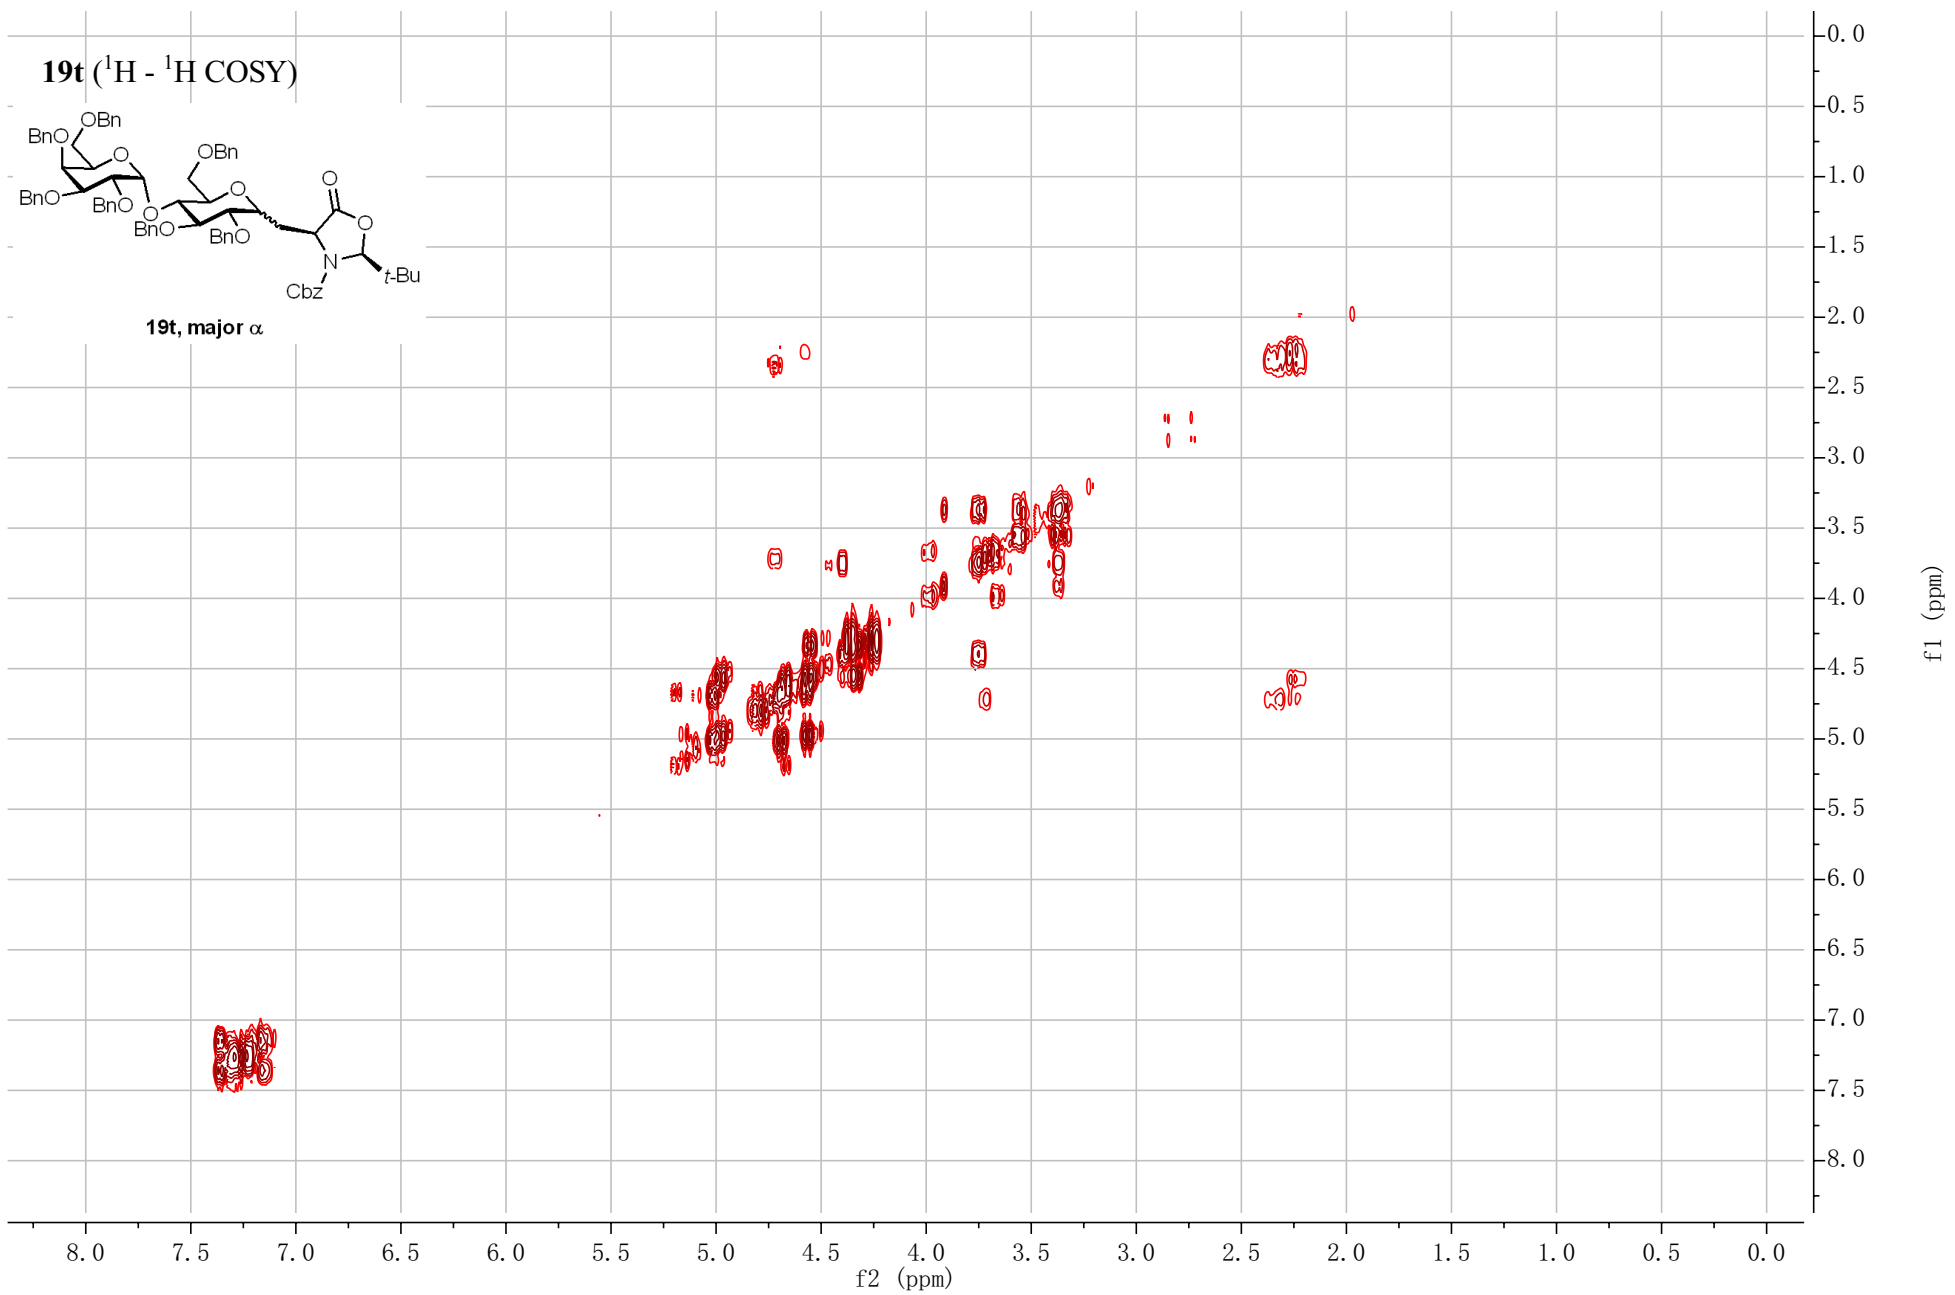

S172

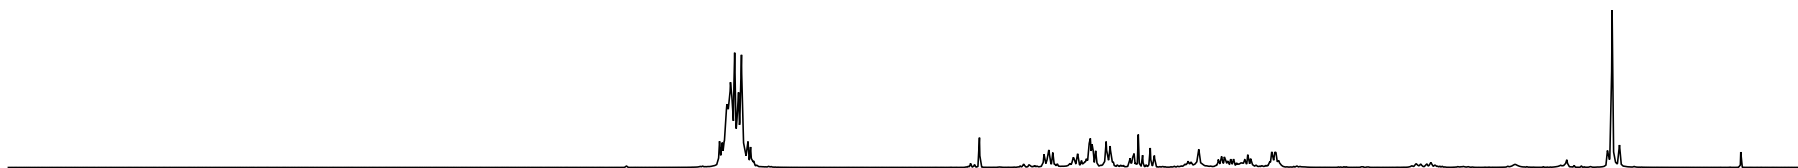

**19t** (<sup>1</sup>H - <sup>13</sup>C Coupled HSQC)

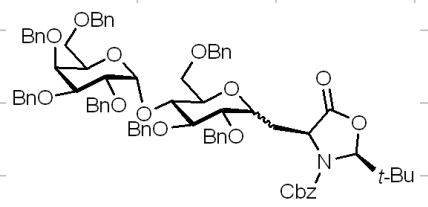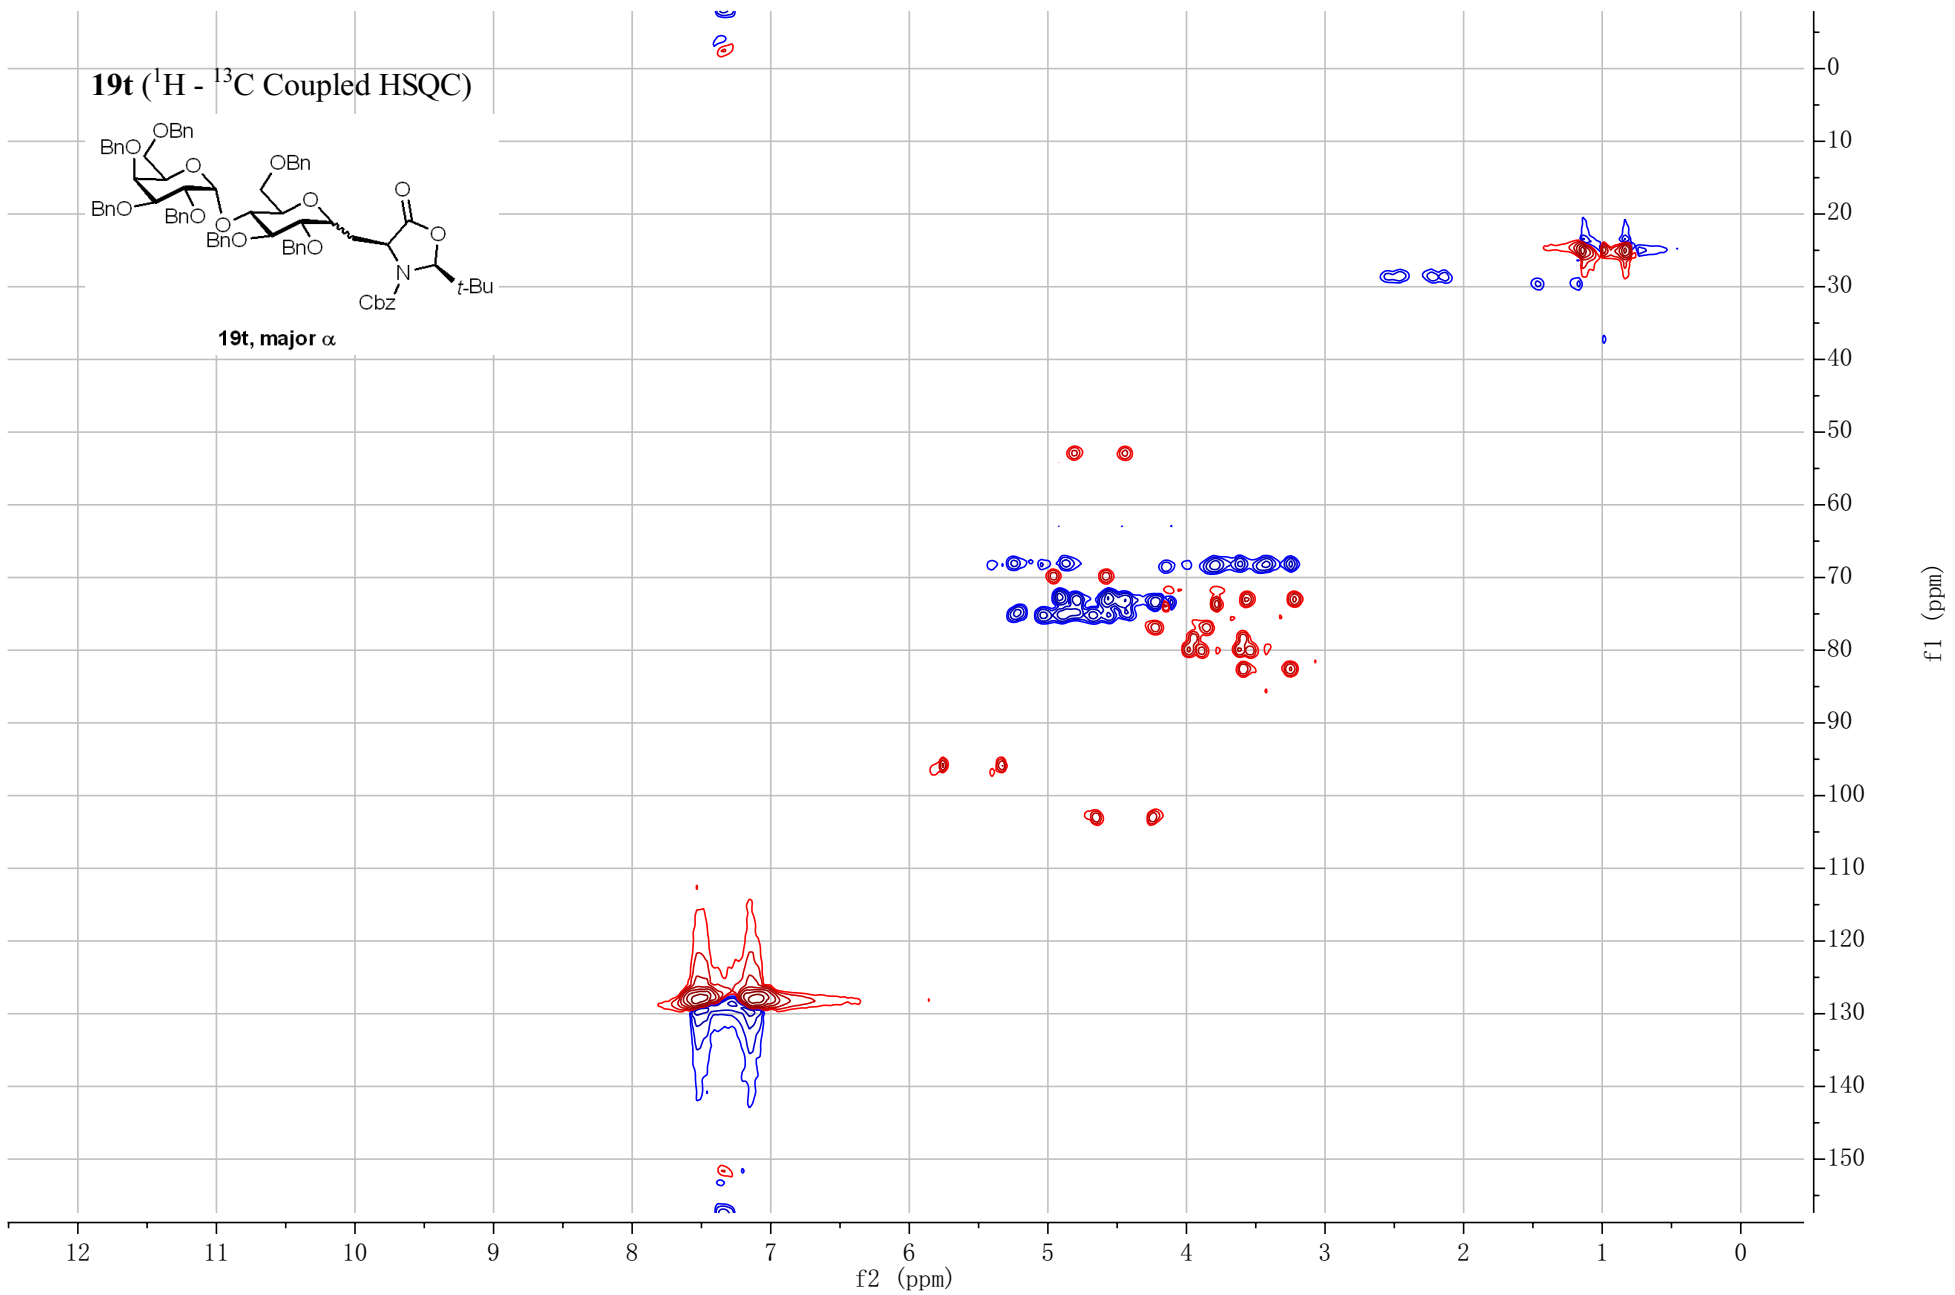

S173



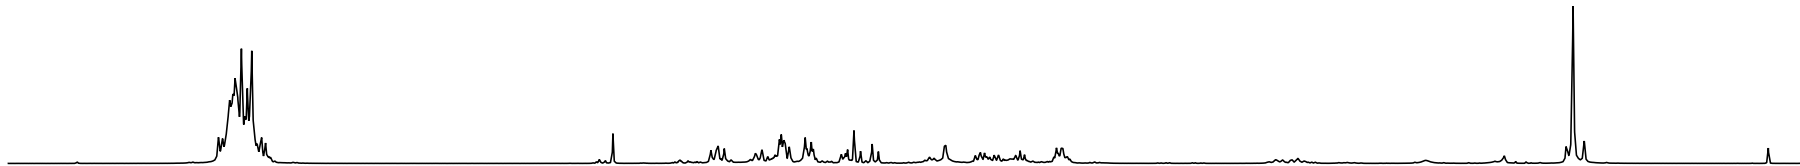

**19t** ( $^1\text{H} - ^{13}\text{C}$  HSQC)

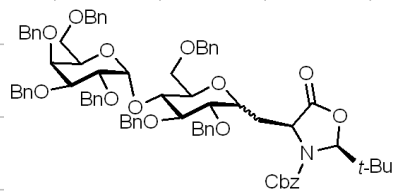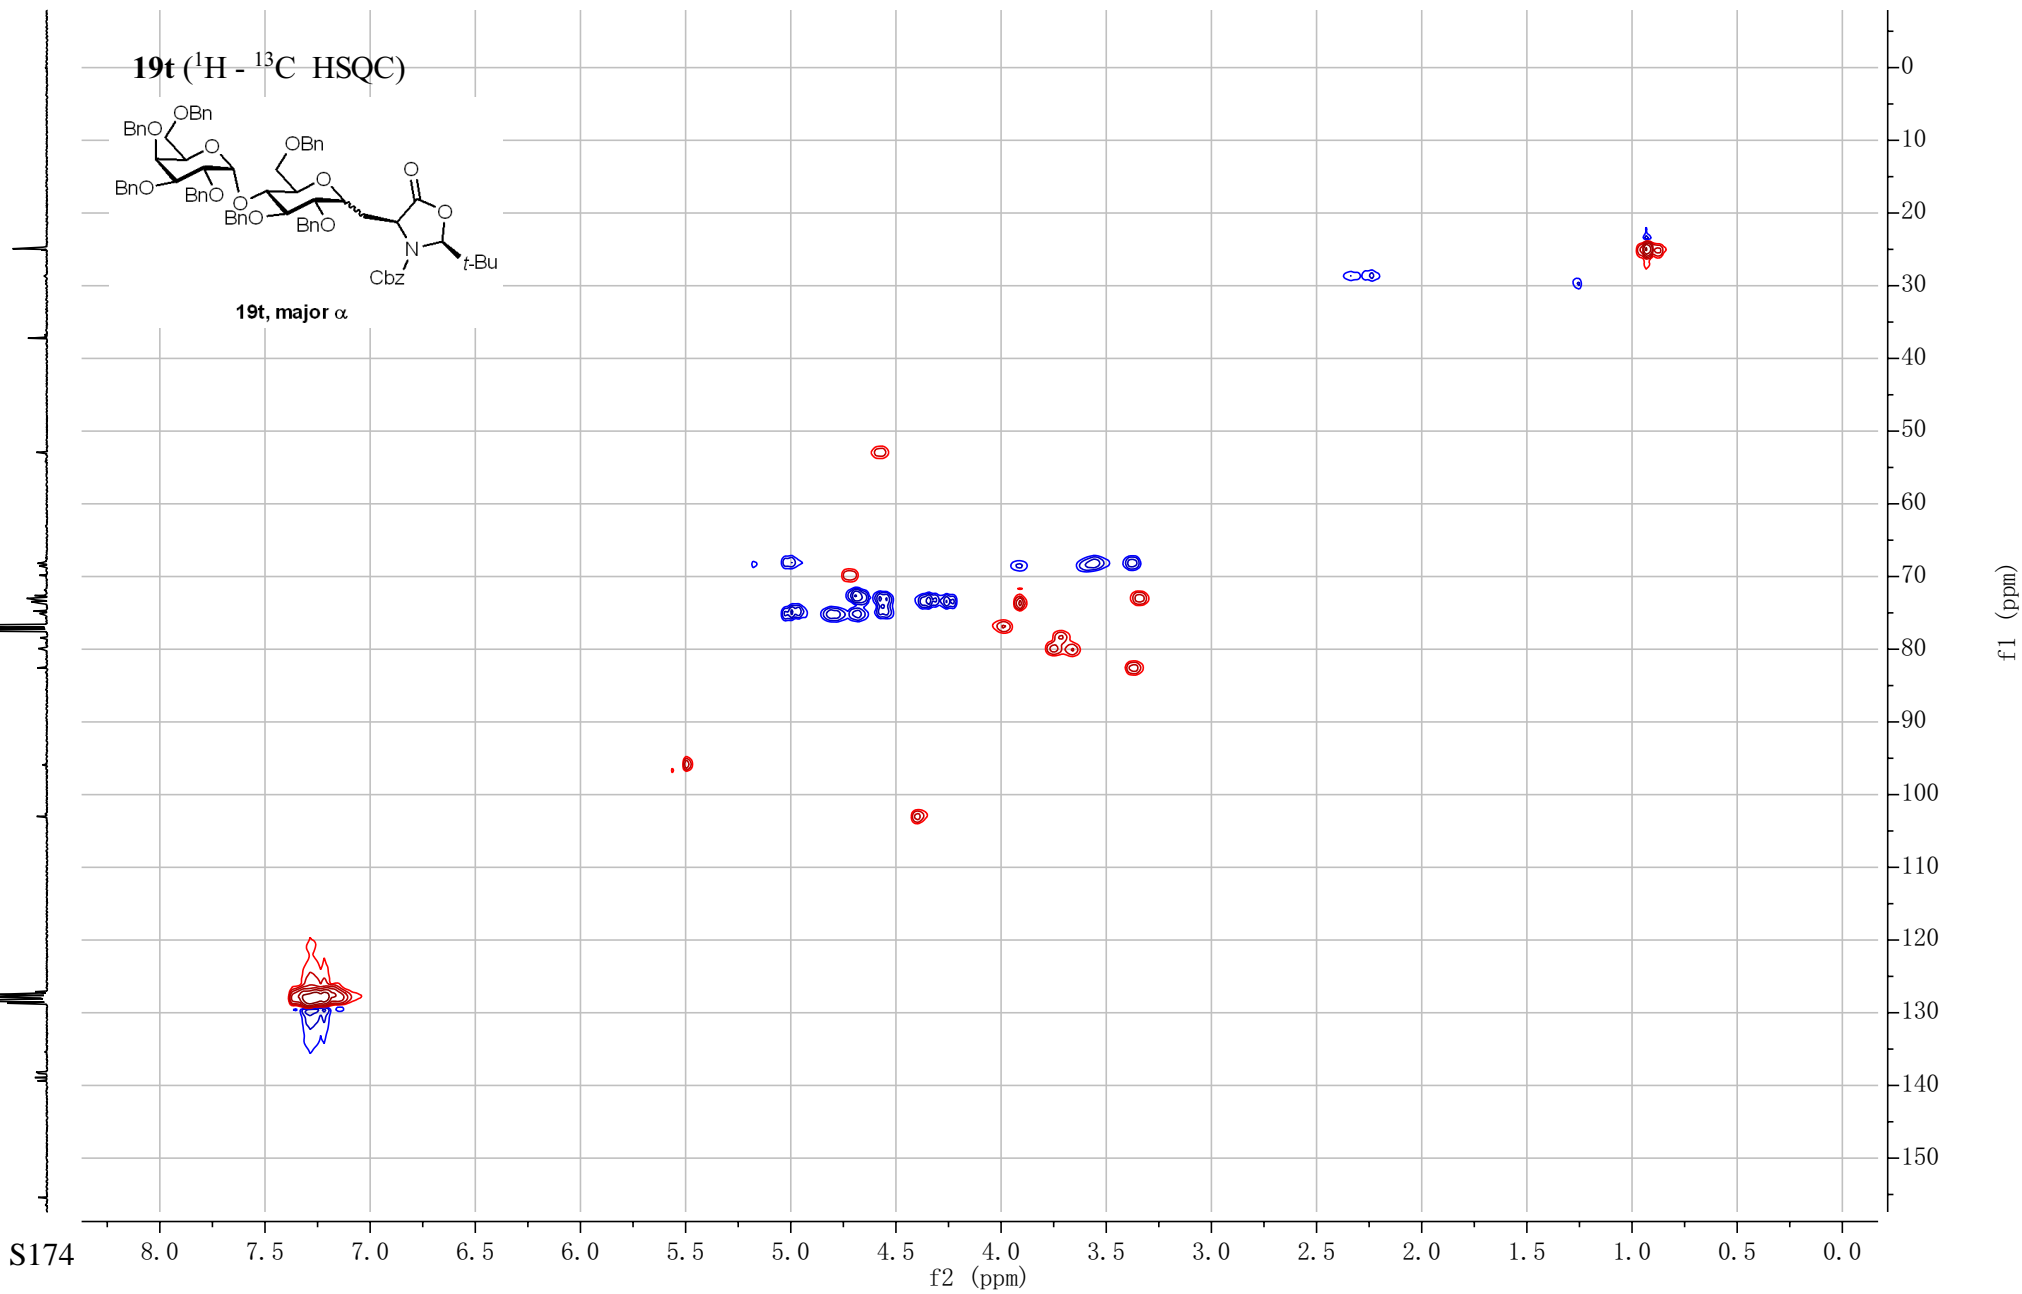

S174

7.38  
7.37  
7.37  
7.36  
7.35  
7.35  
7.34  
7.33  
7.33  
7.32  
7.32  
7.31  
7.30  
7.29  
7.29  
7.28  
7.27  
7.27  
7.26  
7.25  
7.24  
5.61  
5.41  
5.40  
5.36  
5.33  
5.05  
5.03  
4.56  
4.56  
4.55  
4.53  
4.53  
4.52  
4.52  
4.22  
4.22  
4.22  
4.03  
4.02  
3.98  
3.66  
3.65  
3.65  
2.10  
2.09  
2.08  
2.05  
2.04  
2.02  
2.02  
2.00  
1.99  
1.99  
1.98  
1.97  
1.96  
1.95  
1.94  
1.90  
0.94

**19u** (<sup>1</sup>H NMR, 400MHz, CDCl<sub>3</sub>)

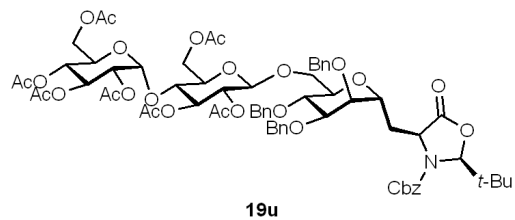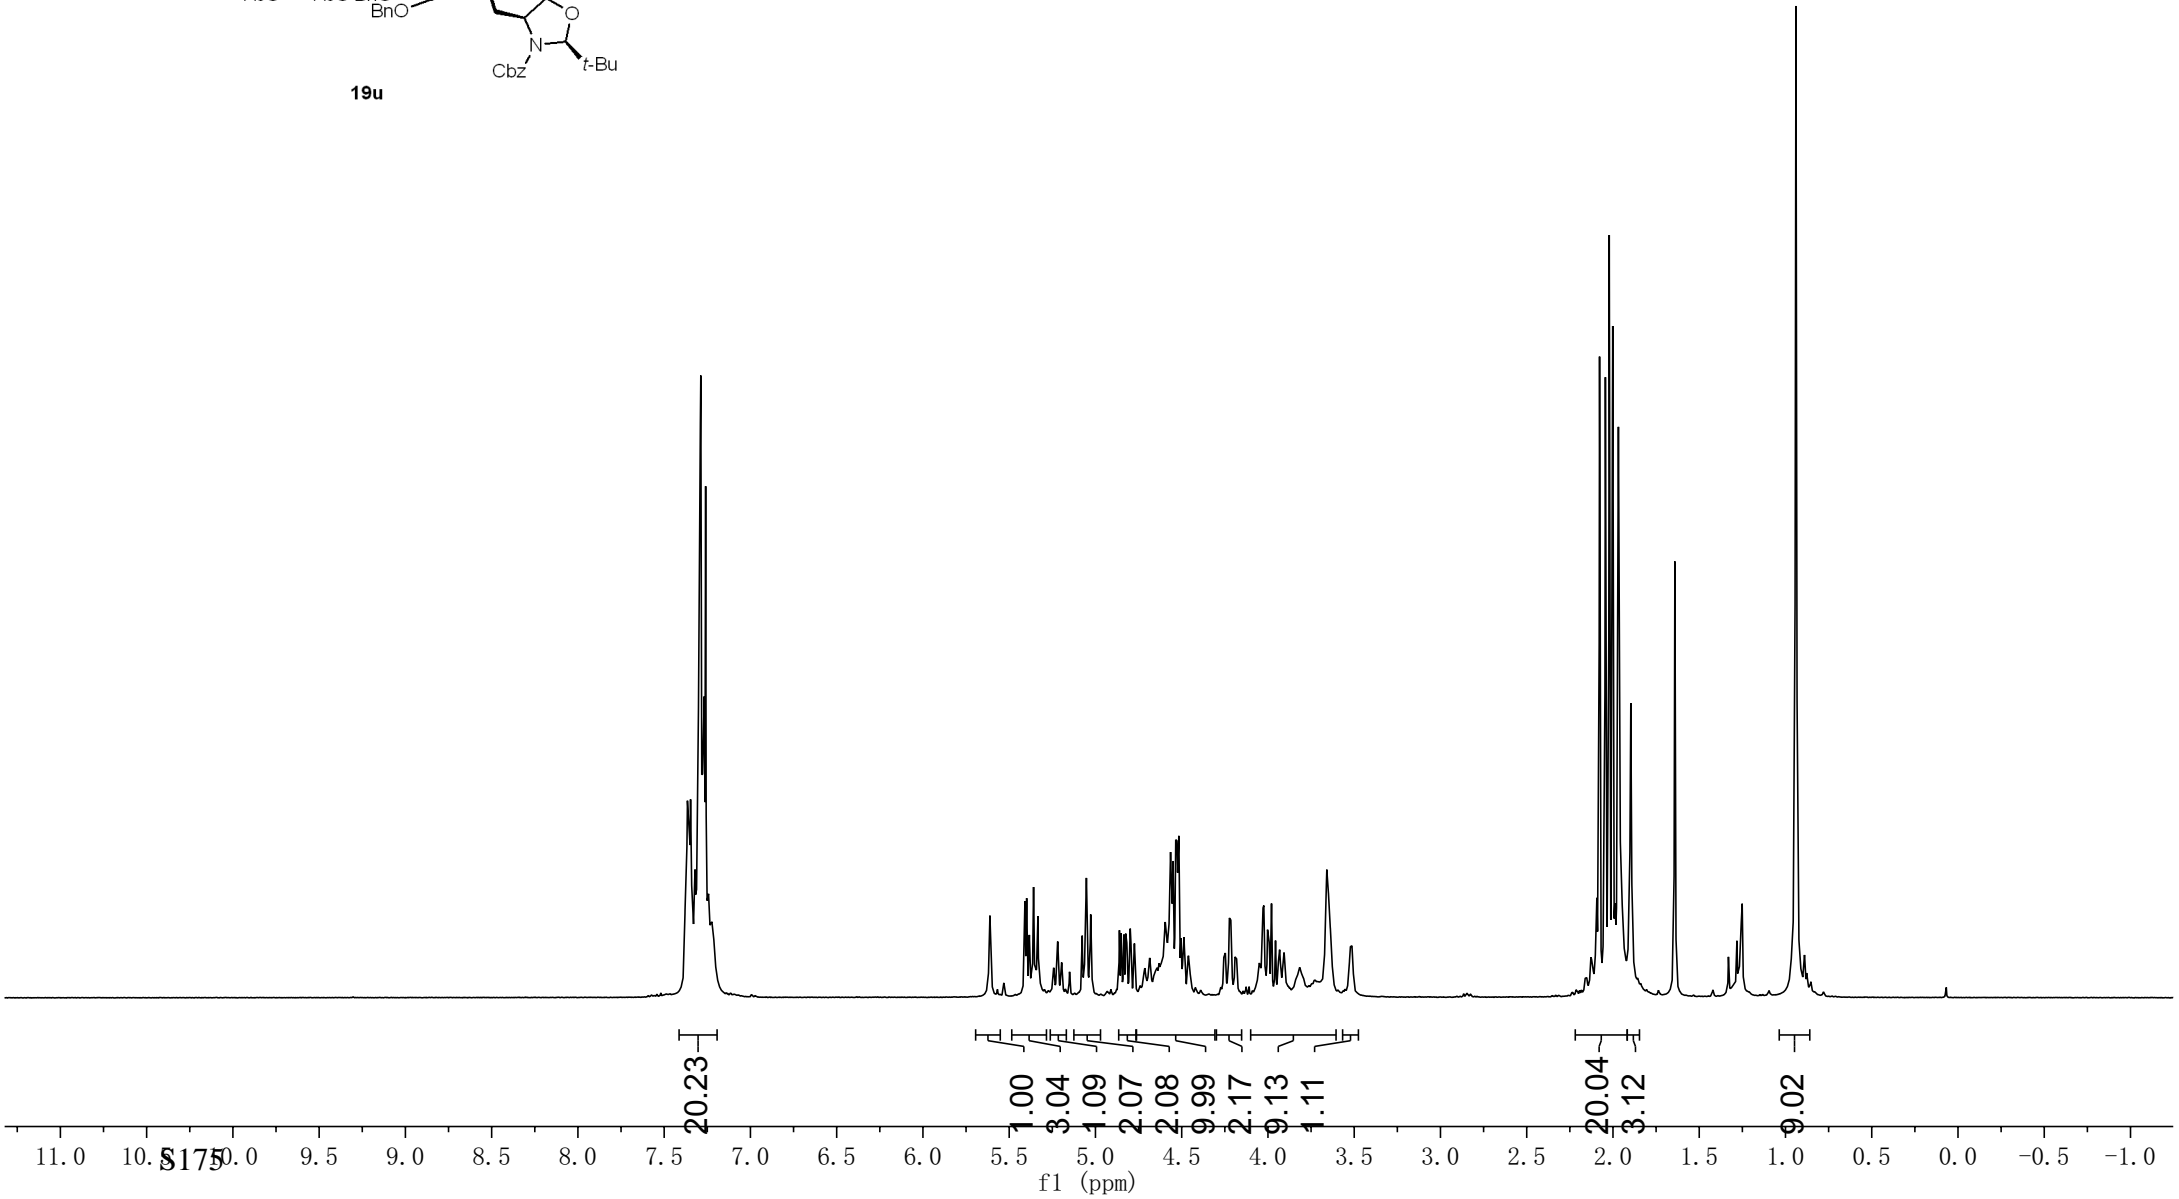

172.75  
170.73  
170.68  
170.58  
170.15  
170.13  
170.06  
169.60  
138.39  
138.18  
138.12  
135.64  
128.79  
128.69  
128.57  
128.52  
128.47  
128.06  
128.02  
127.94  
127.91  
127.87  
127.80  
100.58  
96.14  
95.47  
77.48  
77.16  
76.84  
76.29  
75.18  
74.97  
72.53  
72.33  
72.04  
71.62  
70.13  
69.52  
68.80  
68.50  
68.14  
62.86  
61.57  
37.22  
24.95  
21.01  
20.80  
20.78  
20.75  
20.73  
20.69  
20.56

**19u** ( $^{13}\text{C}$  NMR, 101MHz,  $\text{CDCl}_3$ )

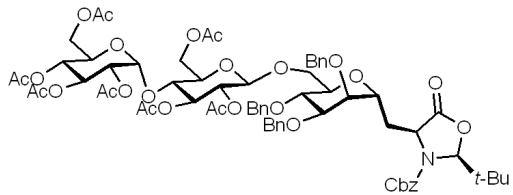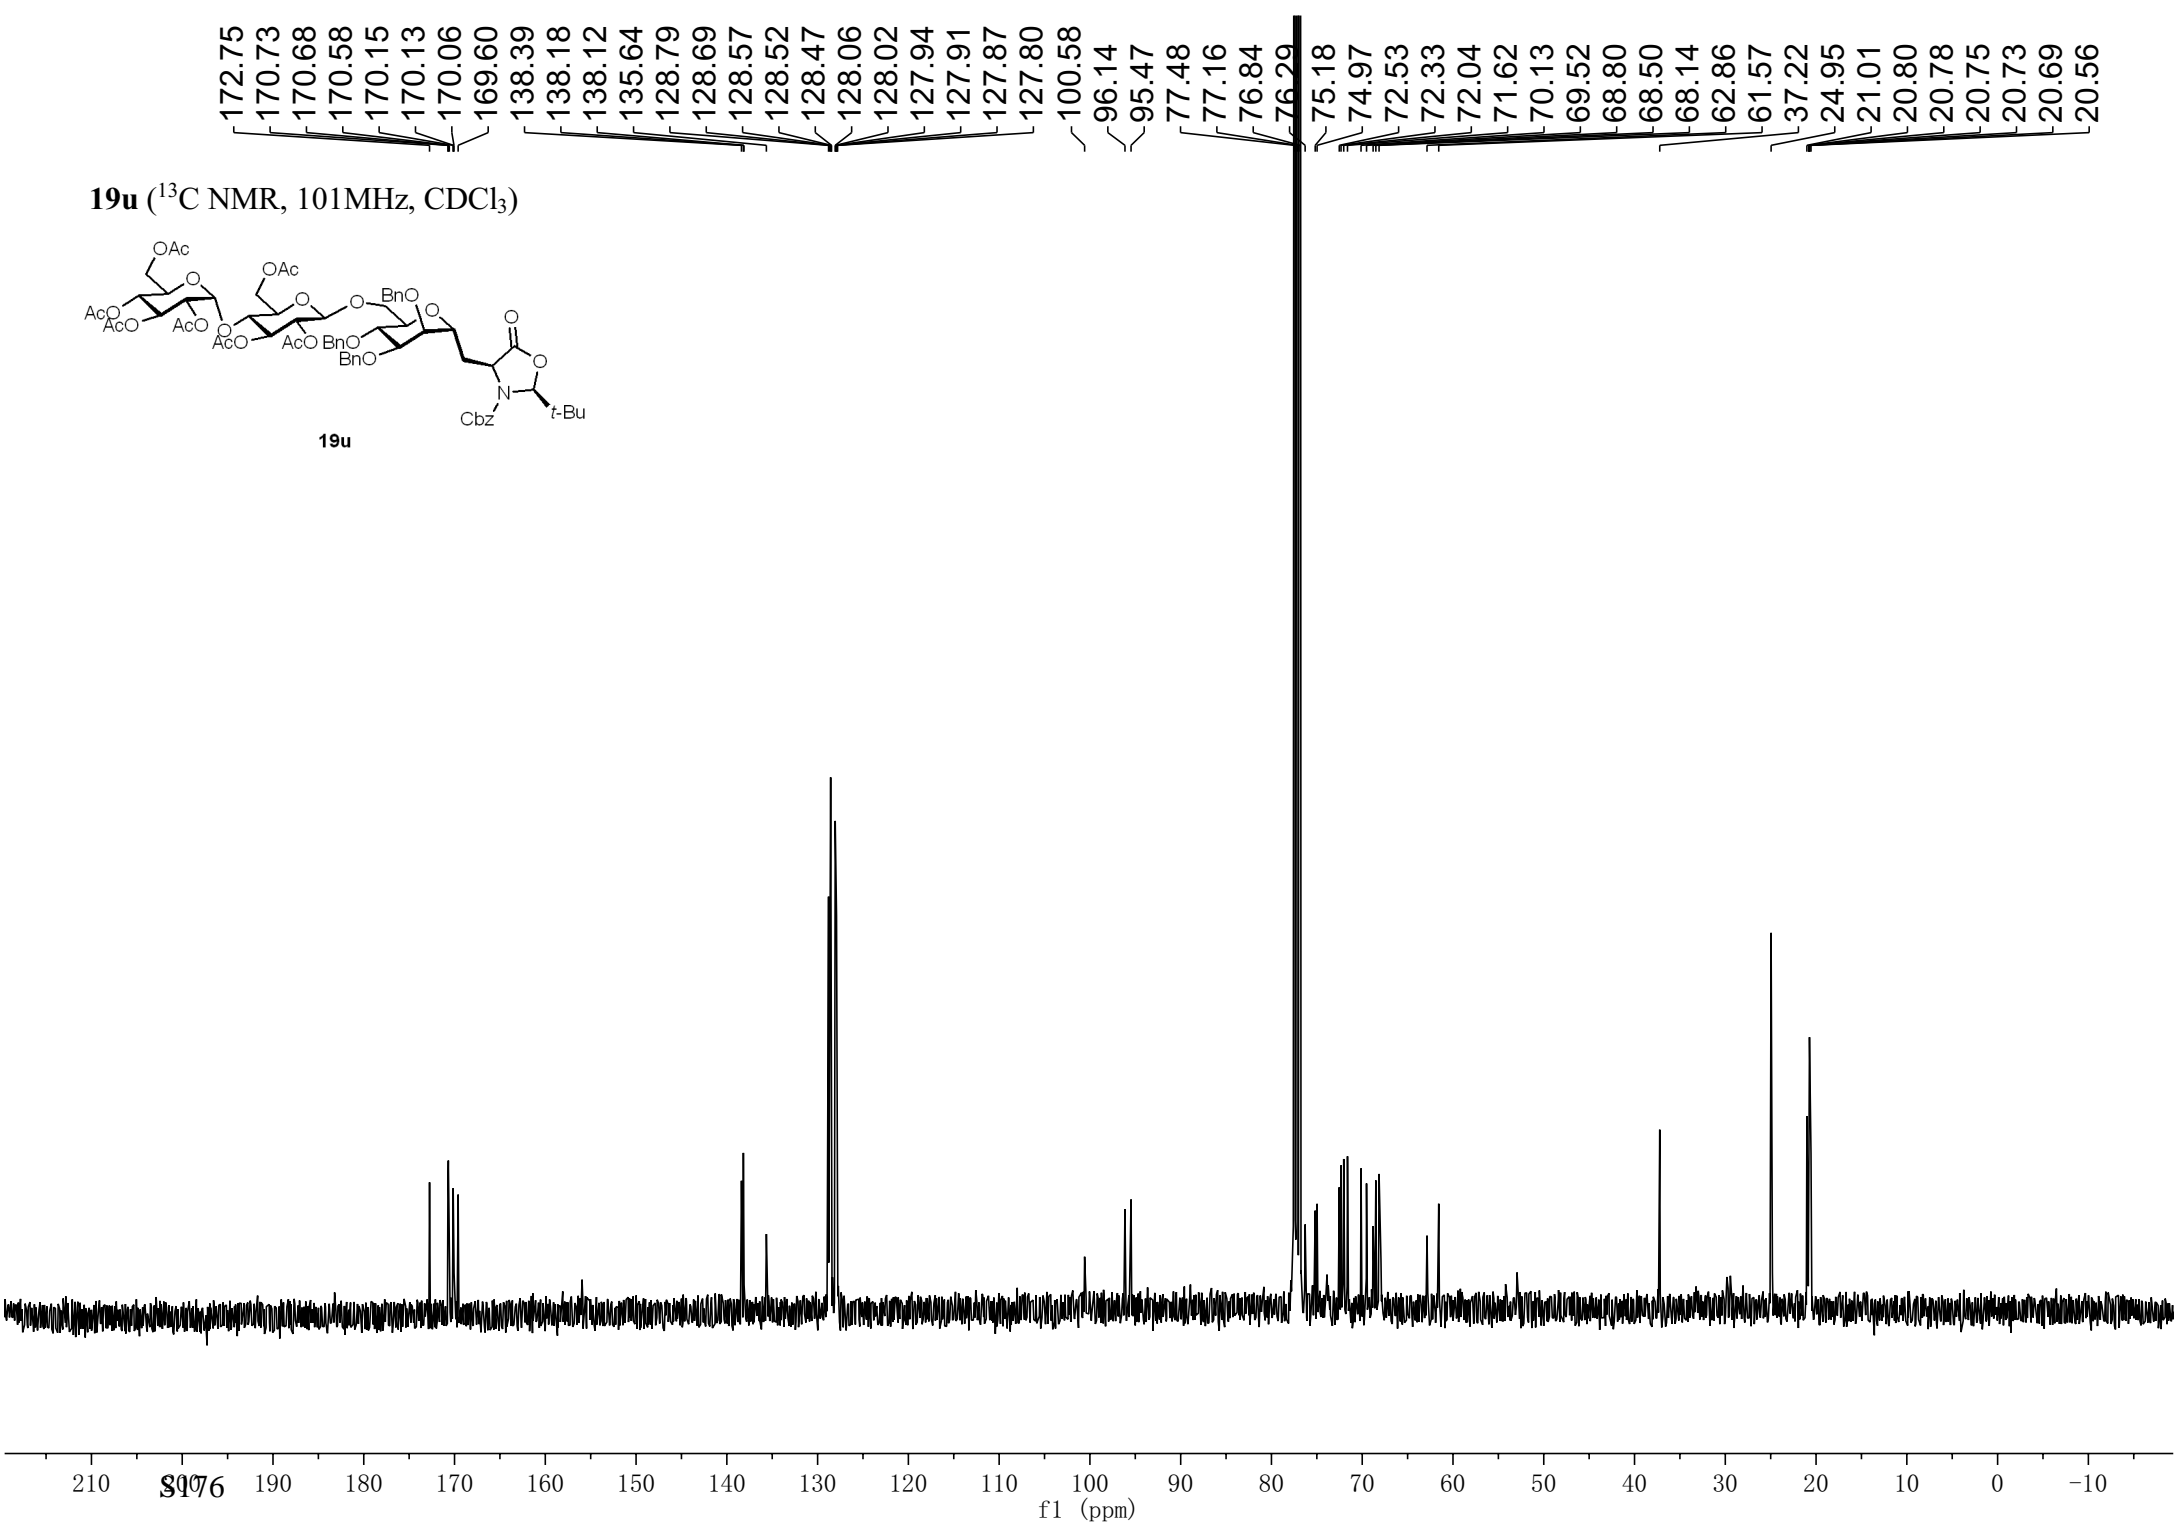

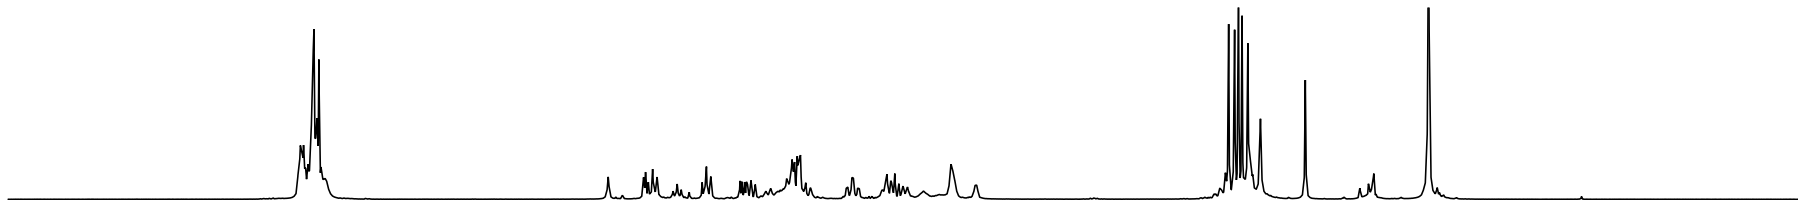

**19u** ( $^1\text{H} - ^1\text{H}$  COSY)

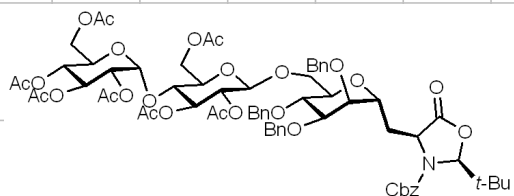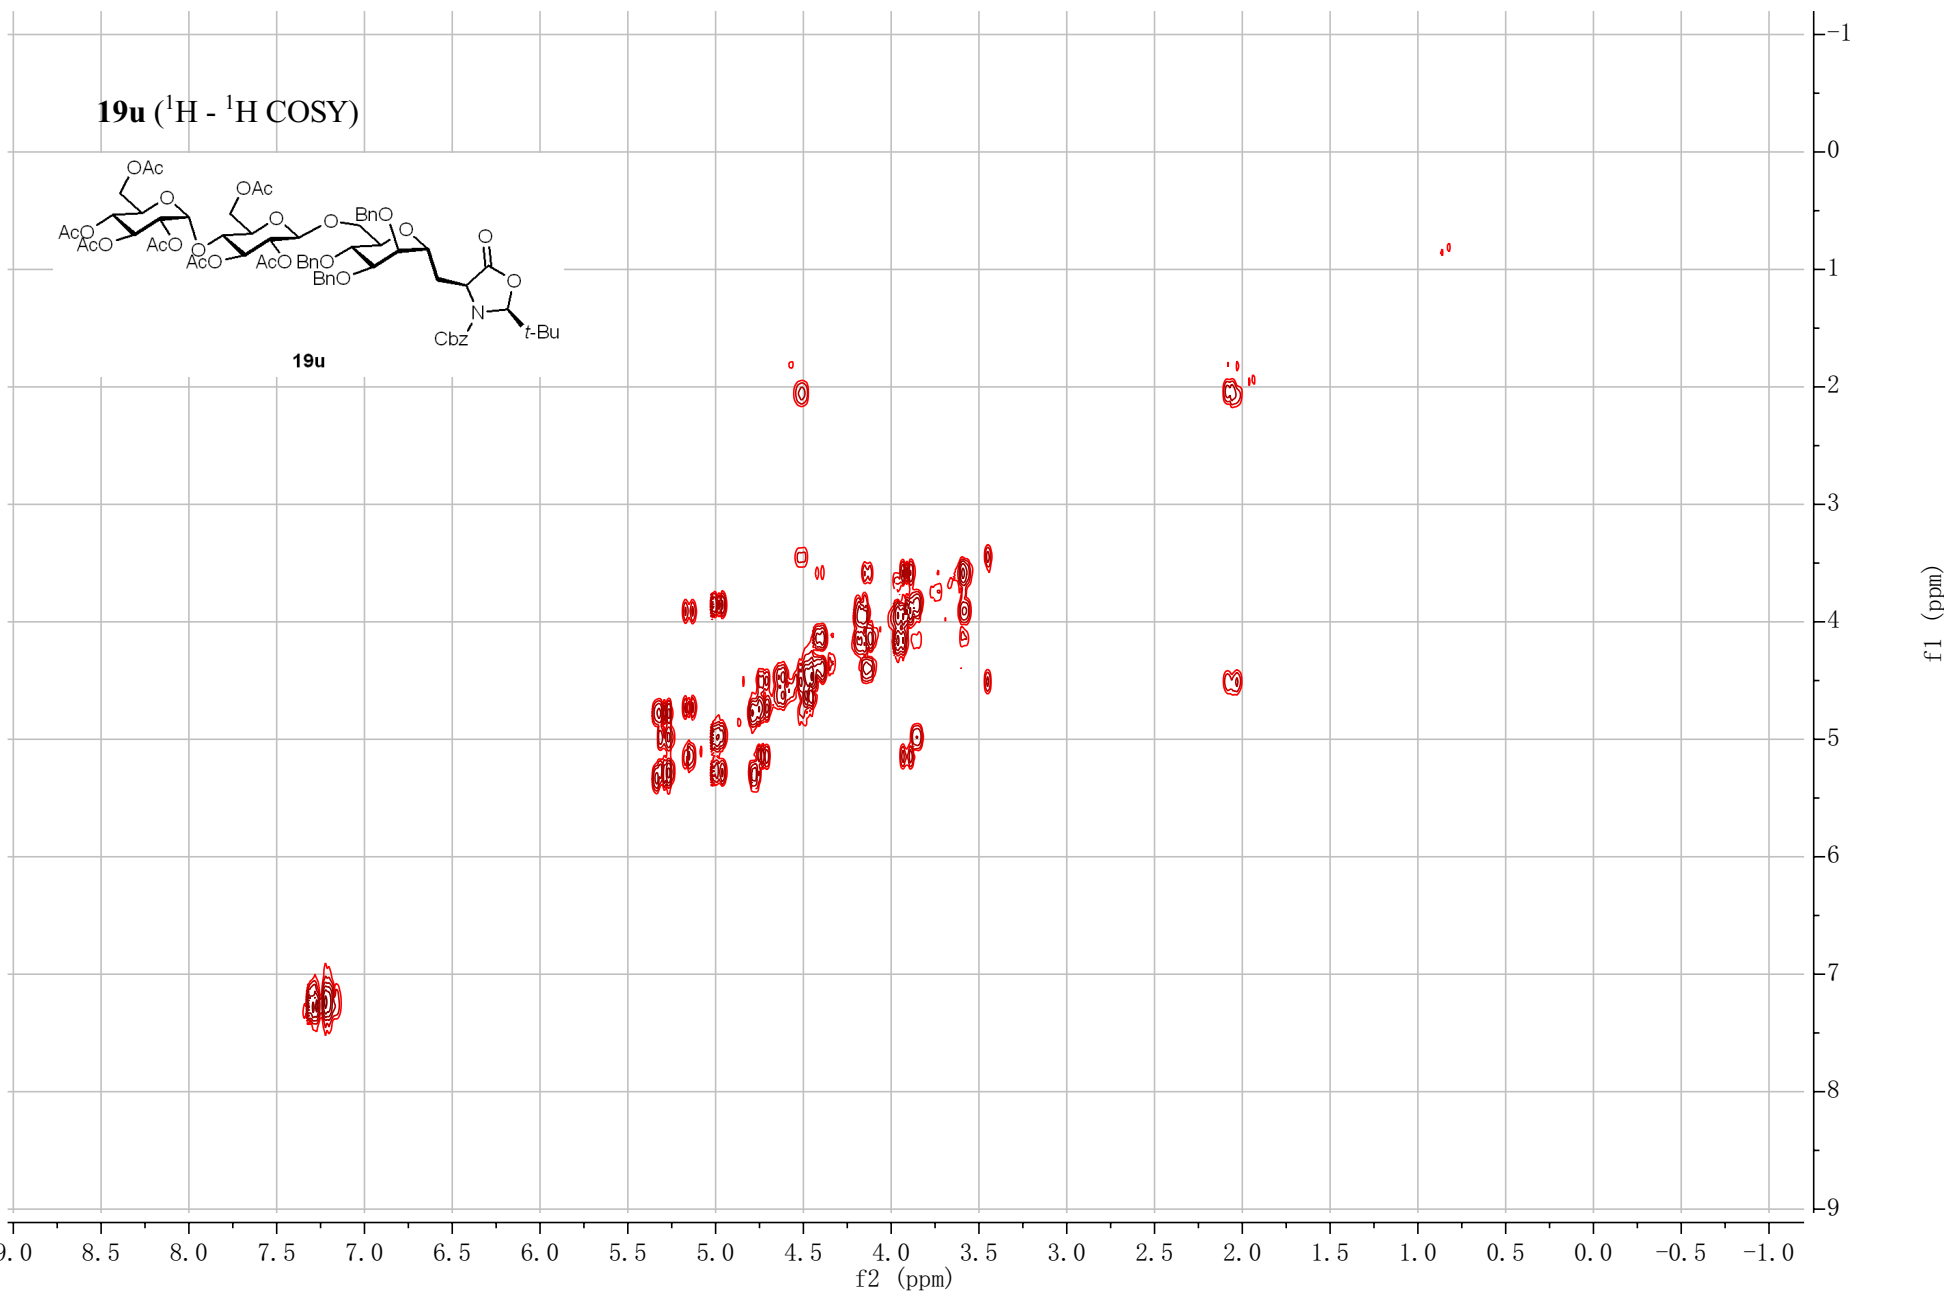

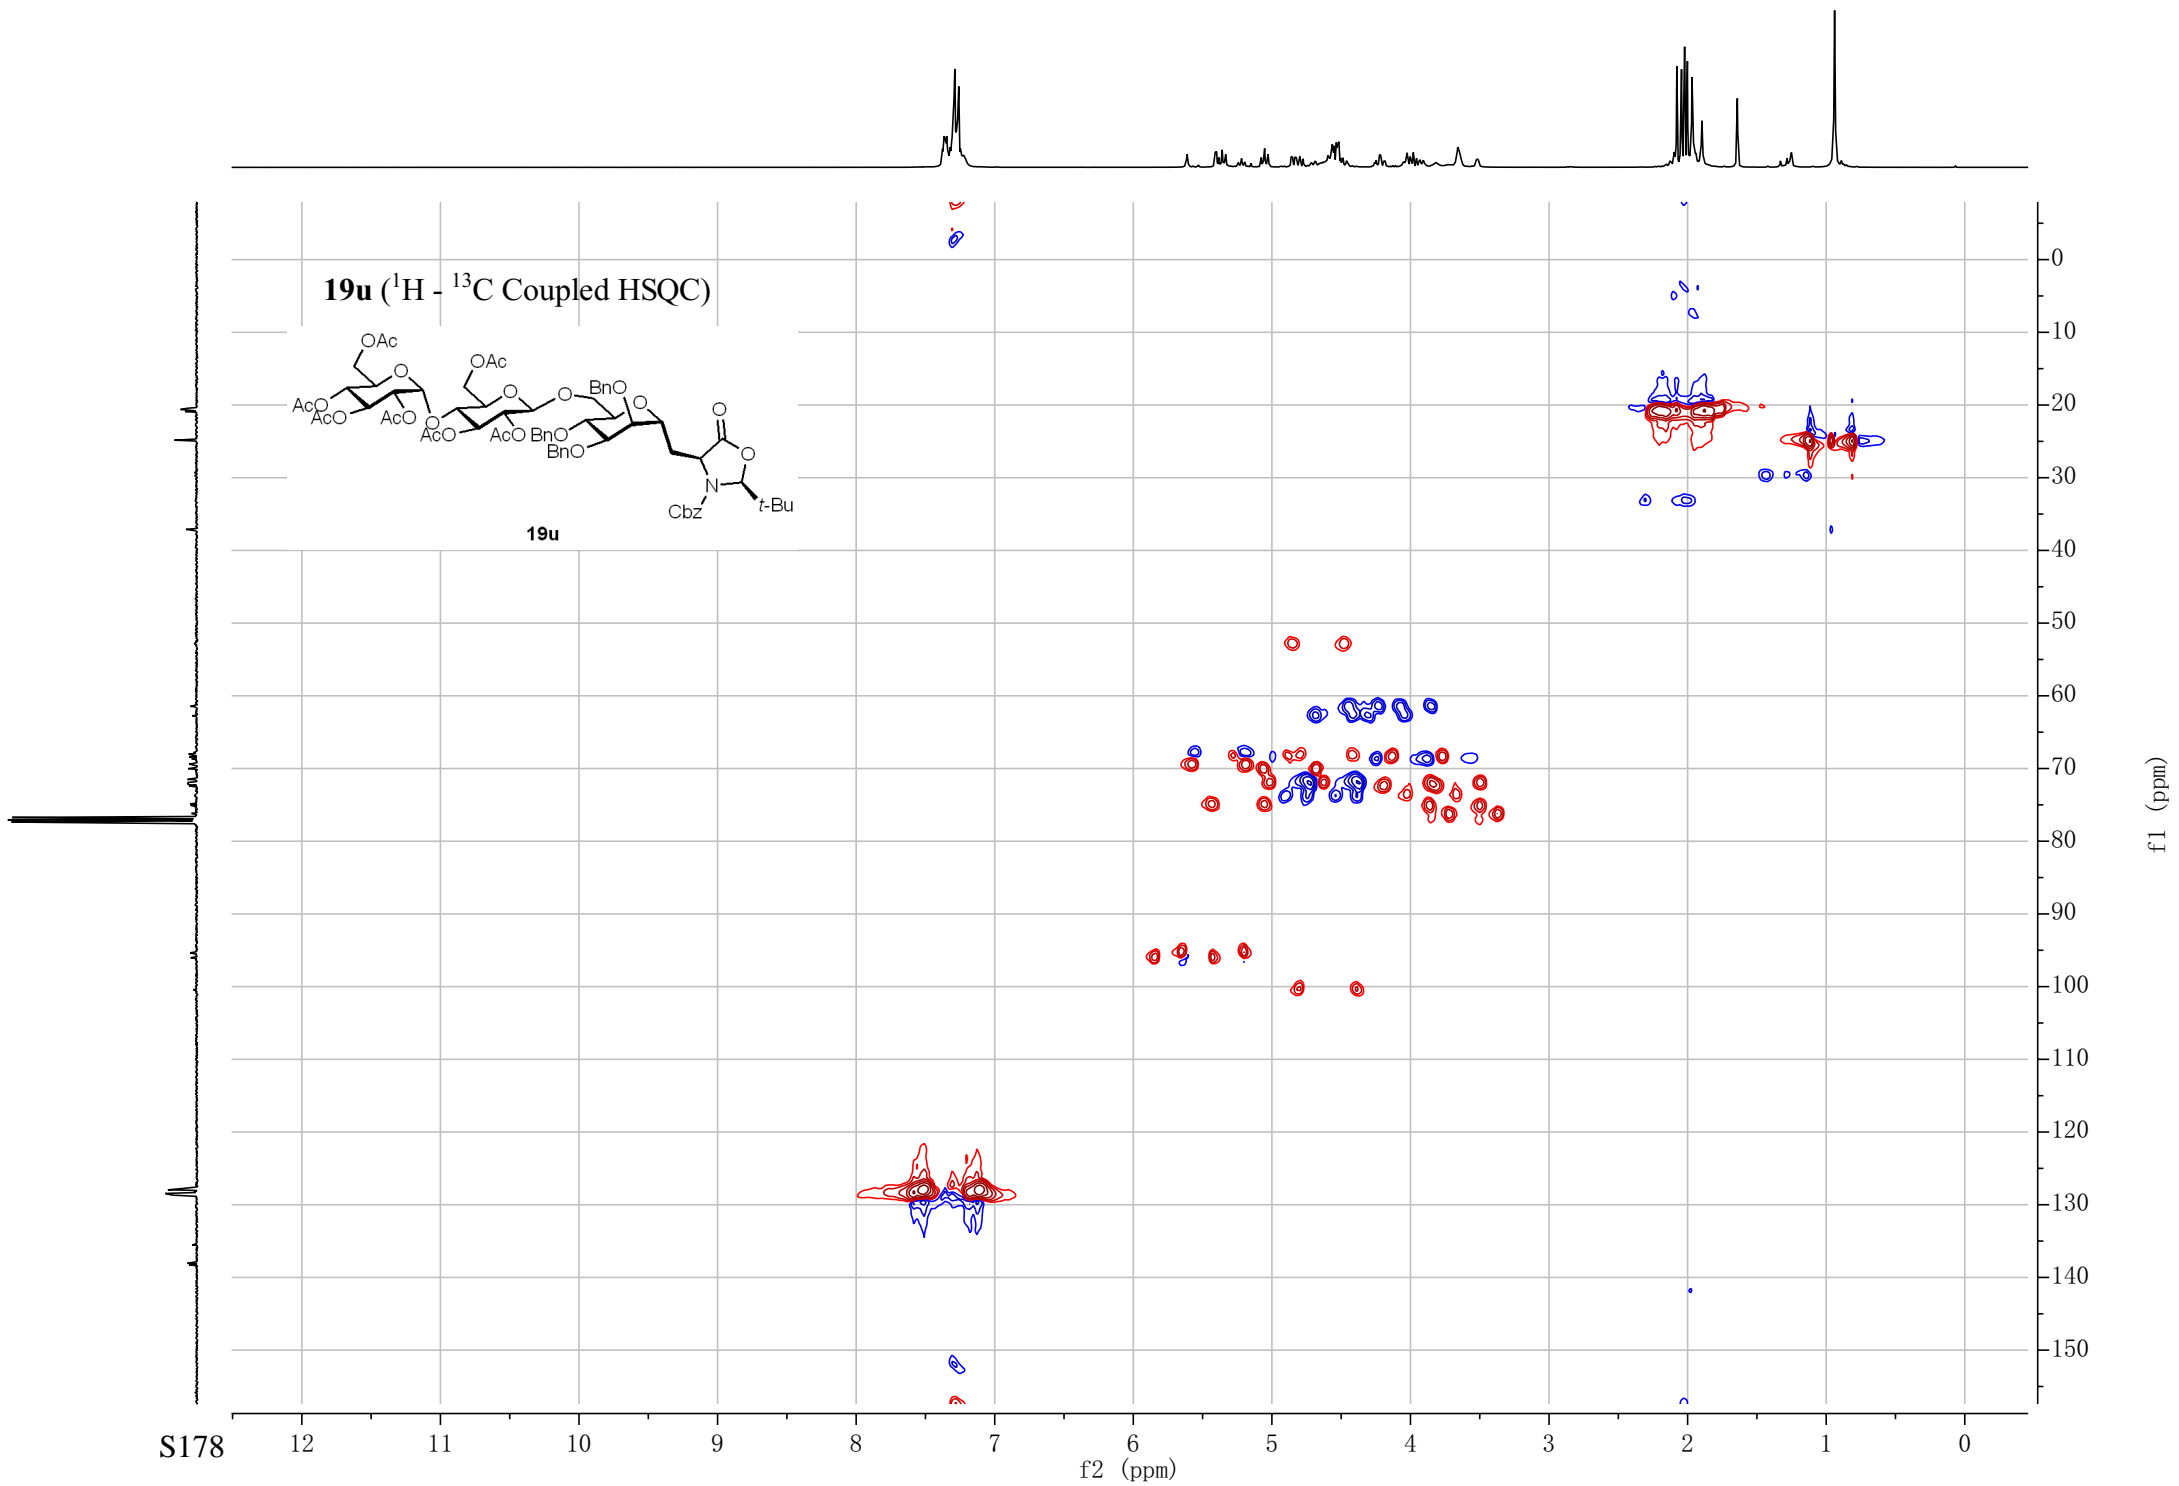

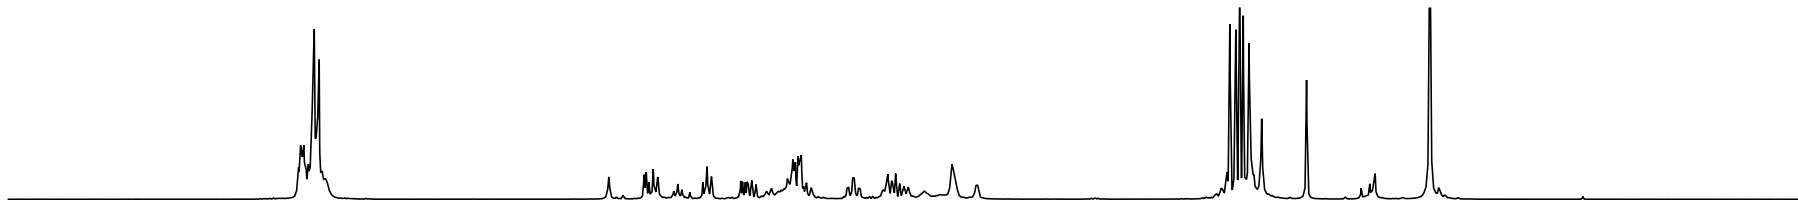

**19u** ( $^1\text{H}$  -  $^{13}\text{C}$  HSQC)

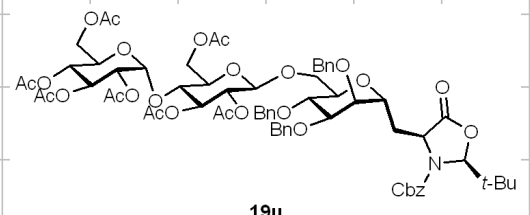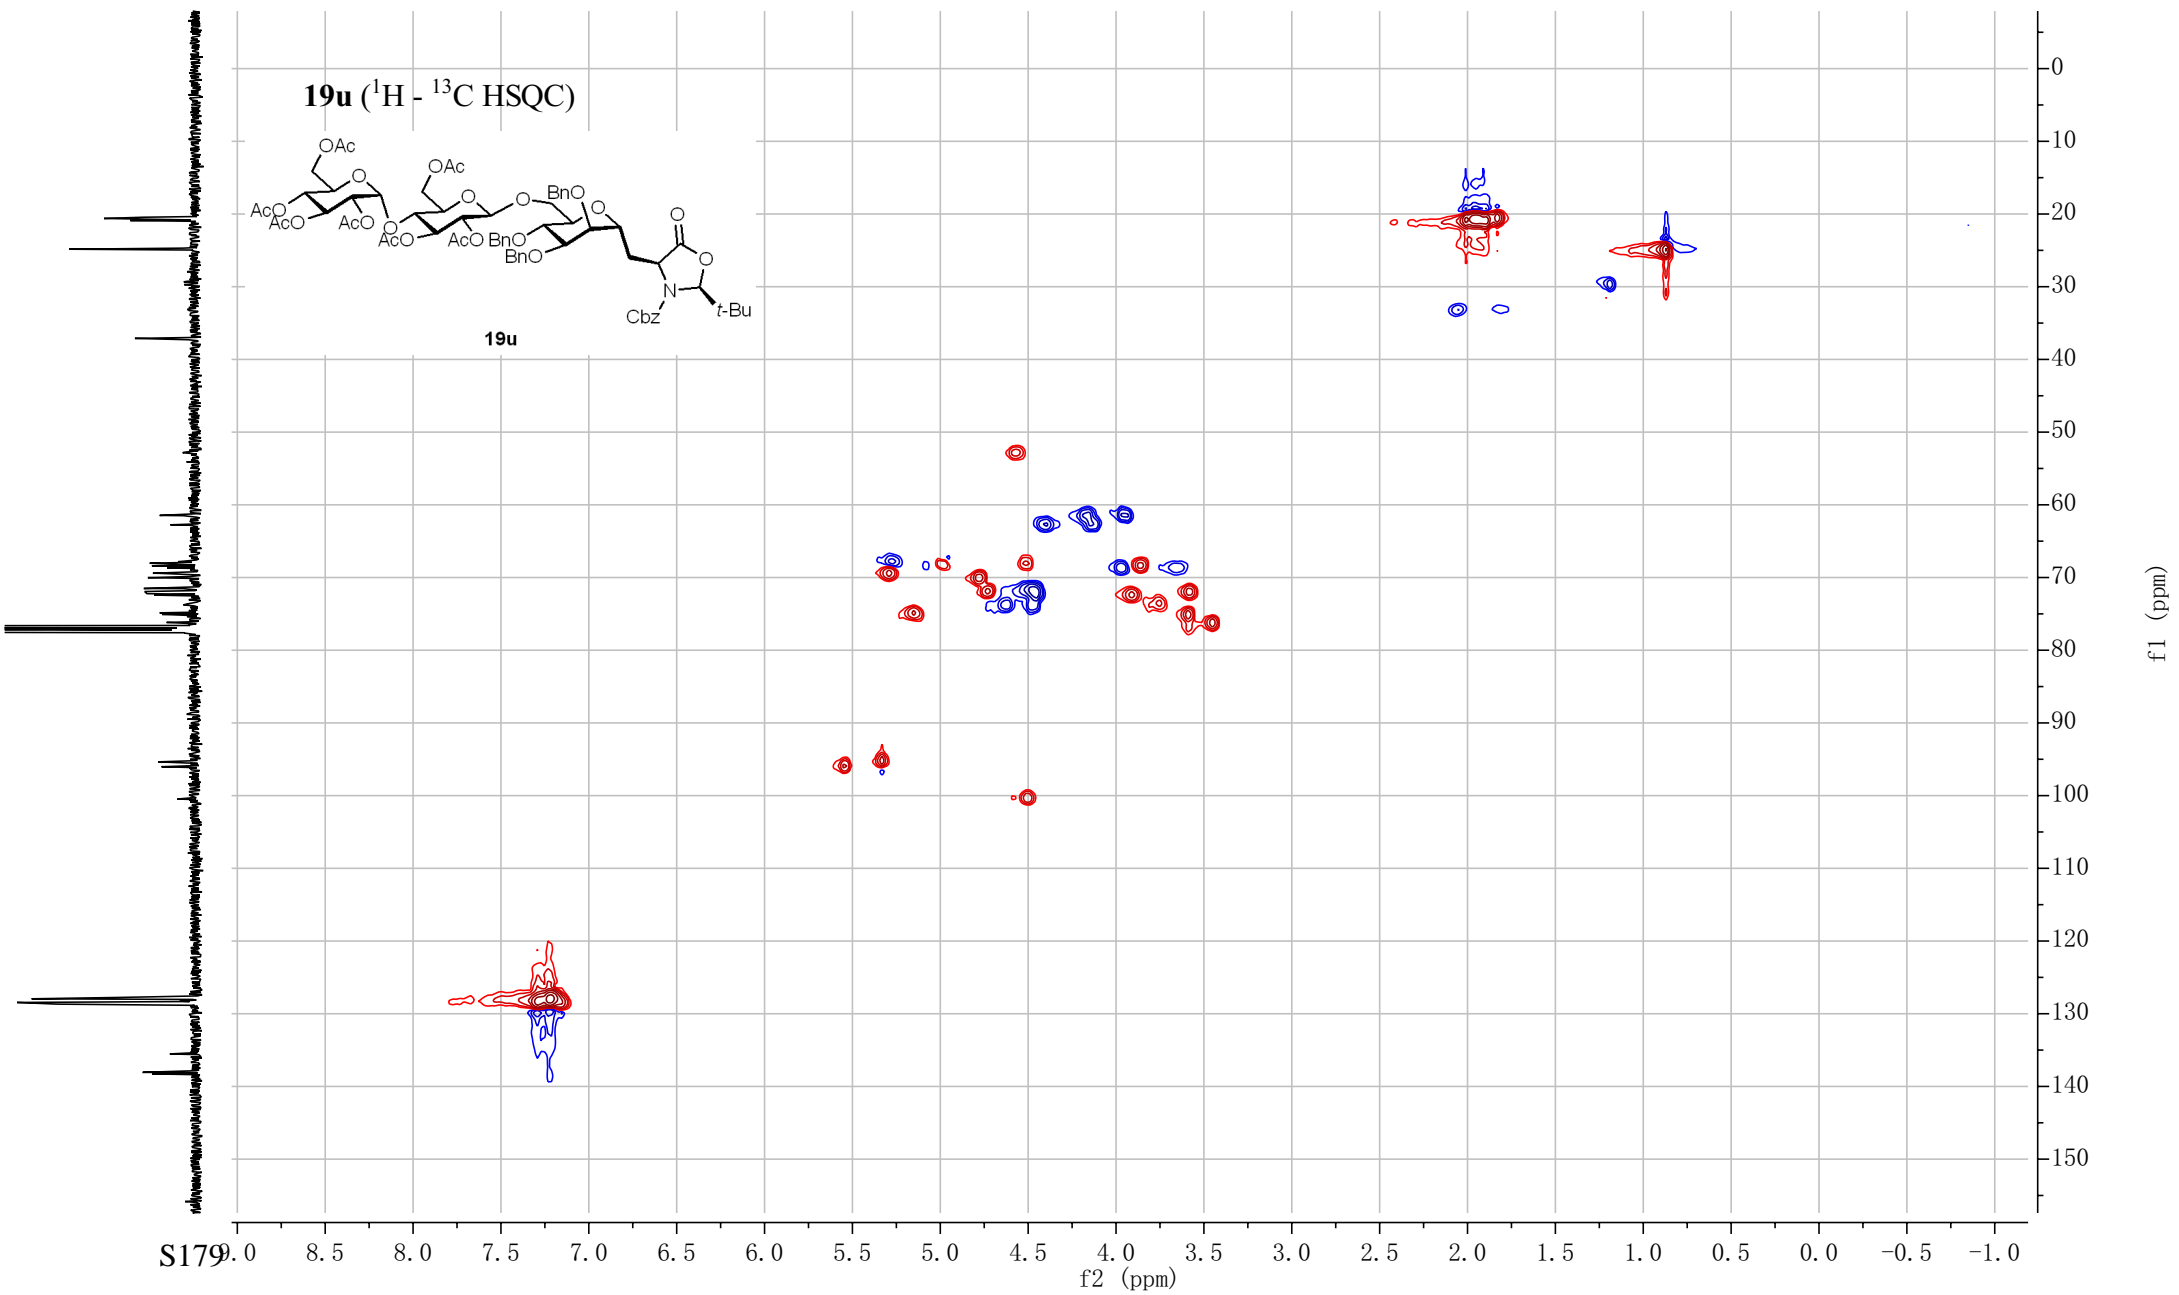

7.38  
7.38  
7.37  
7.37  
7.36  
7.36  
7.35  
7.34  
7.34  
7.33  
7.33  
7.32  
7.32  
7.31  
7.31  
7.30  
7.30  
7.29  
7.29  
7.29  
7.28  
7.28  
7.27  
7.27  
7.26  
7.26  
7.25  
7.24  
7.24  
7.23  
5.64  
5.34  
5.34  
5.33  
4.56  
4.54  
4.53  
4.51  
4.51  
4.50  
4.48  
4.46  
4.12  
4.12  
4.10  
4.10  
3.65  
3.64  
2.15  
2.05  
2.04  
2.04  
2.03  
2.02  
2.01  
1.96  
1.93  
1.92  
0.95

**19v** (<sup>1</sup>H NMR, 400MHz, CDCl<sub>3</sub>)

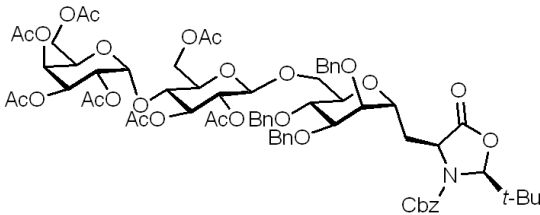

**19v**

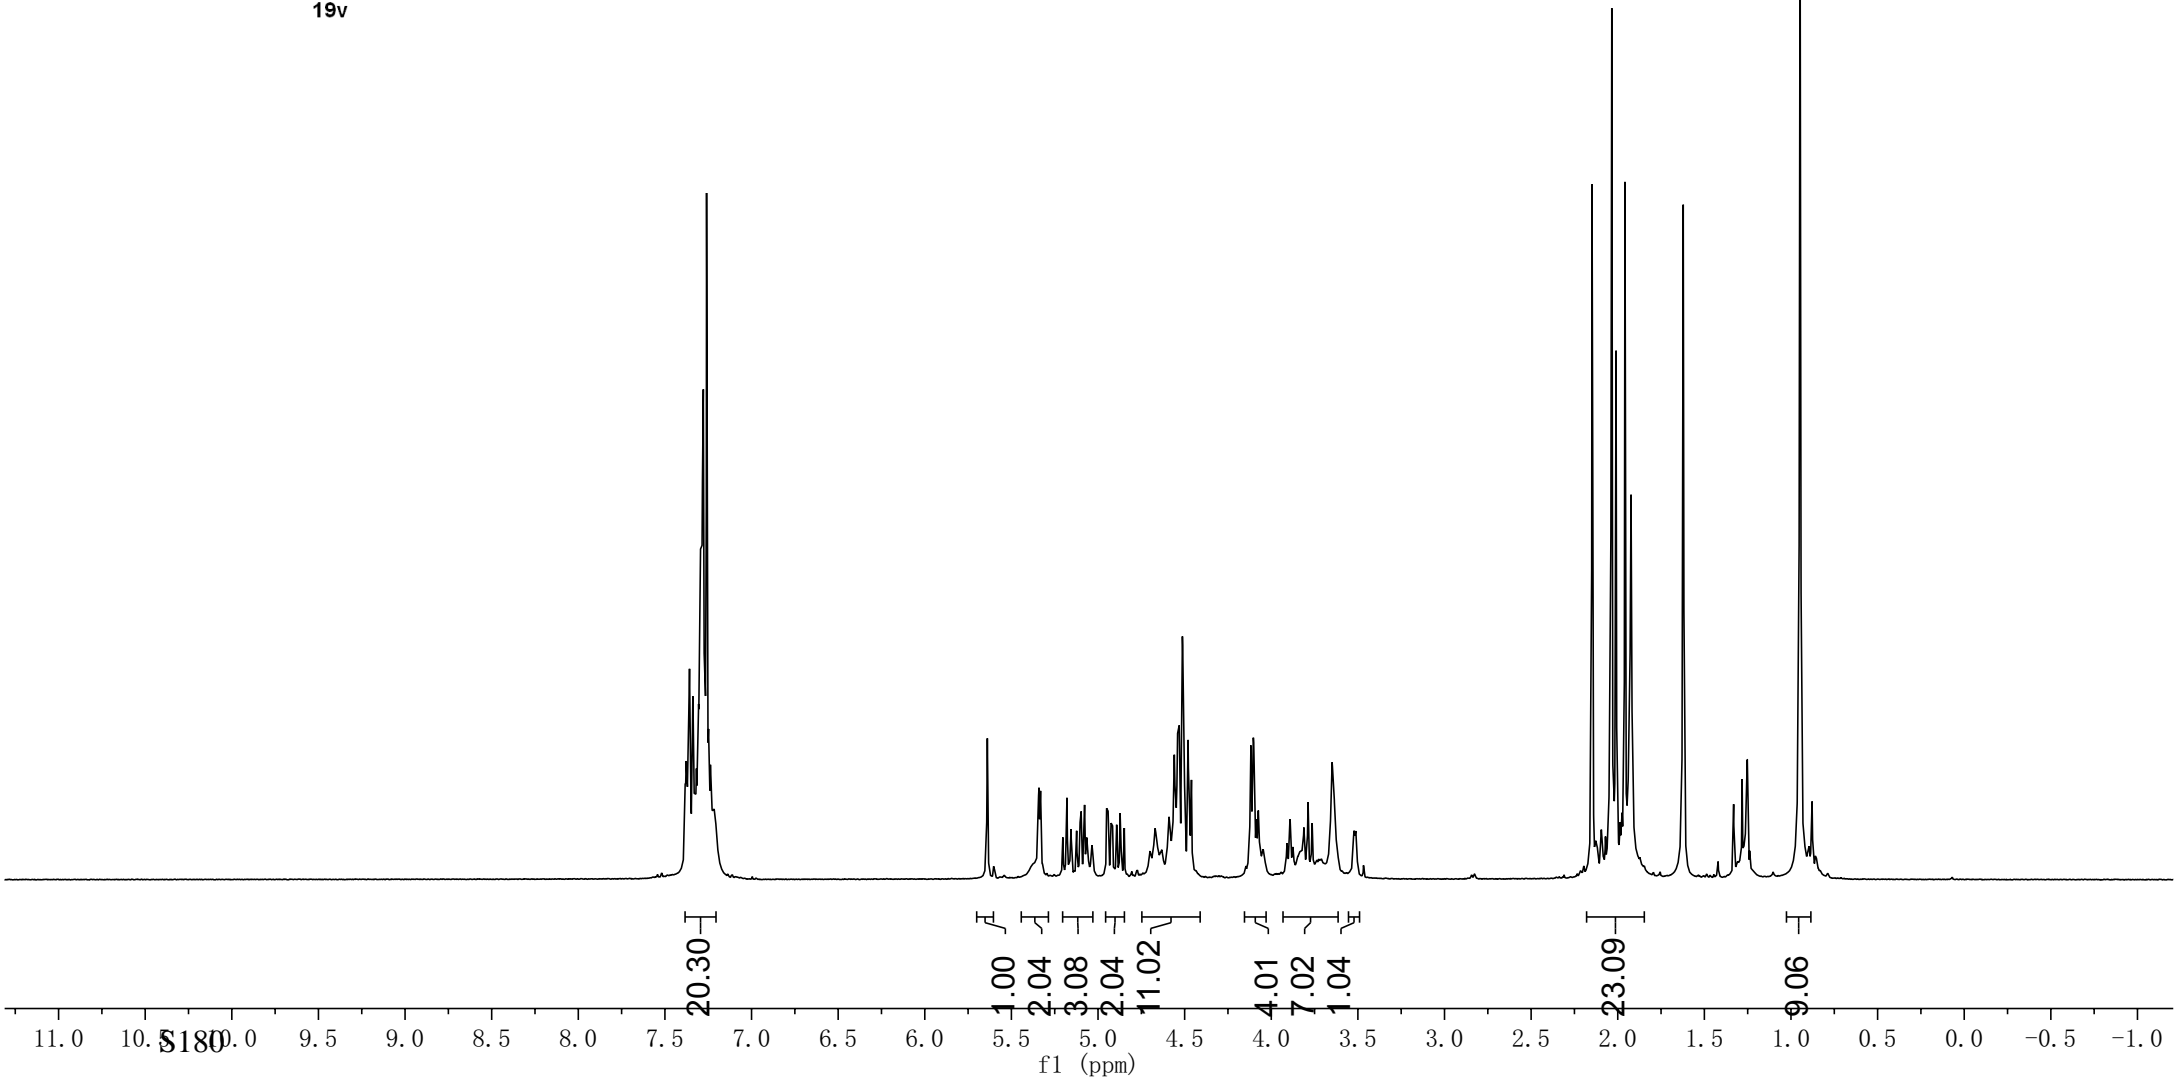

172.82  
170.50  
170.46  
170.33  
170.21  
170.18  
169.76  
169.13  
155.99  
138.36  
138.15  
138.09  
135.66  
128.77  
128.72  
128.53  
128.49  
128.45  
128.03  
127.96  
127.90  
127.87  
127.84  
127.78  
100.72  
96.18  
77.48  
77.16  
76.84  
76.19  
75.19  
72.46  
72.30  
72.01  
71.68  
71.59  
71.17  
70.74  
69.14  
68.73  
67.89  
66.76  
62.09  
60.89  
37.21  
31.55  
24.94  
20.92  
20.80  
20.77  
20.64  
20.62

**19v** (<sup>13</sup>C NMR, 101MHz, CDCl<sub>3</sub>)

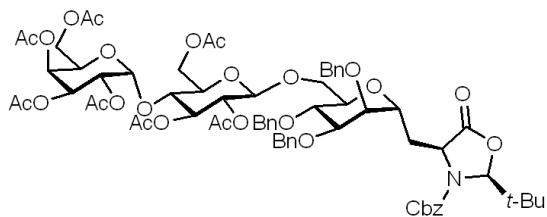

**19v**

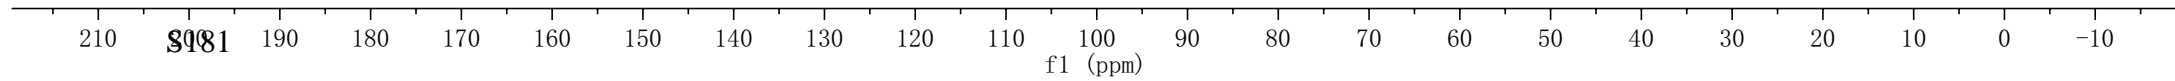



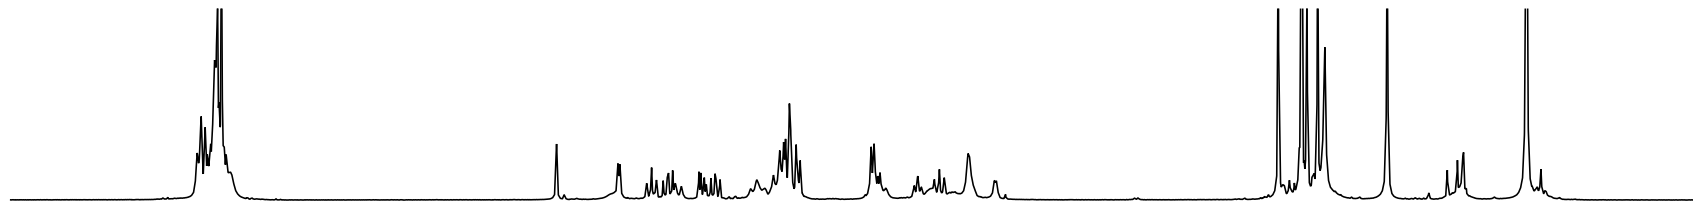

**19v** (<sup>1</sup>H - <sup>1</sup>H COSY)

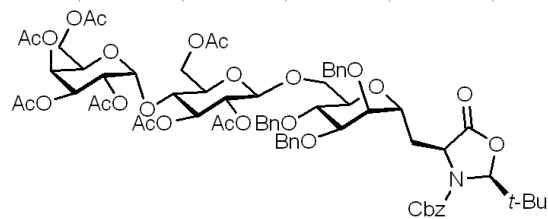

**19v**

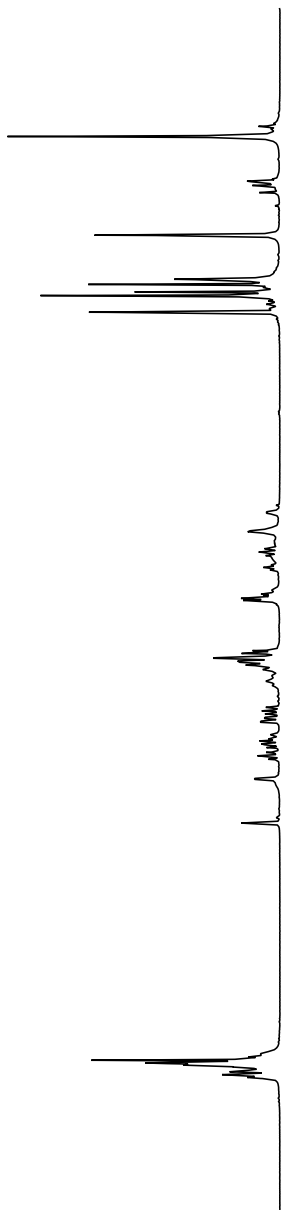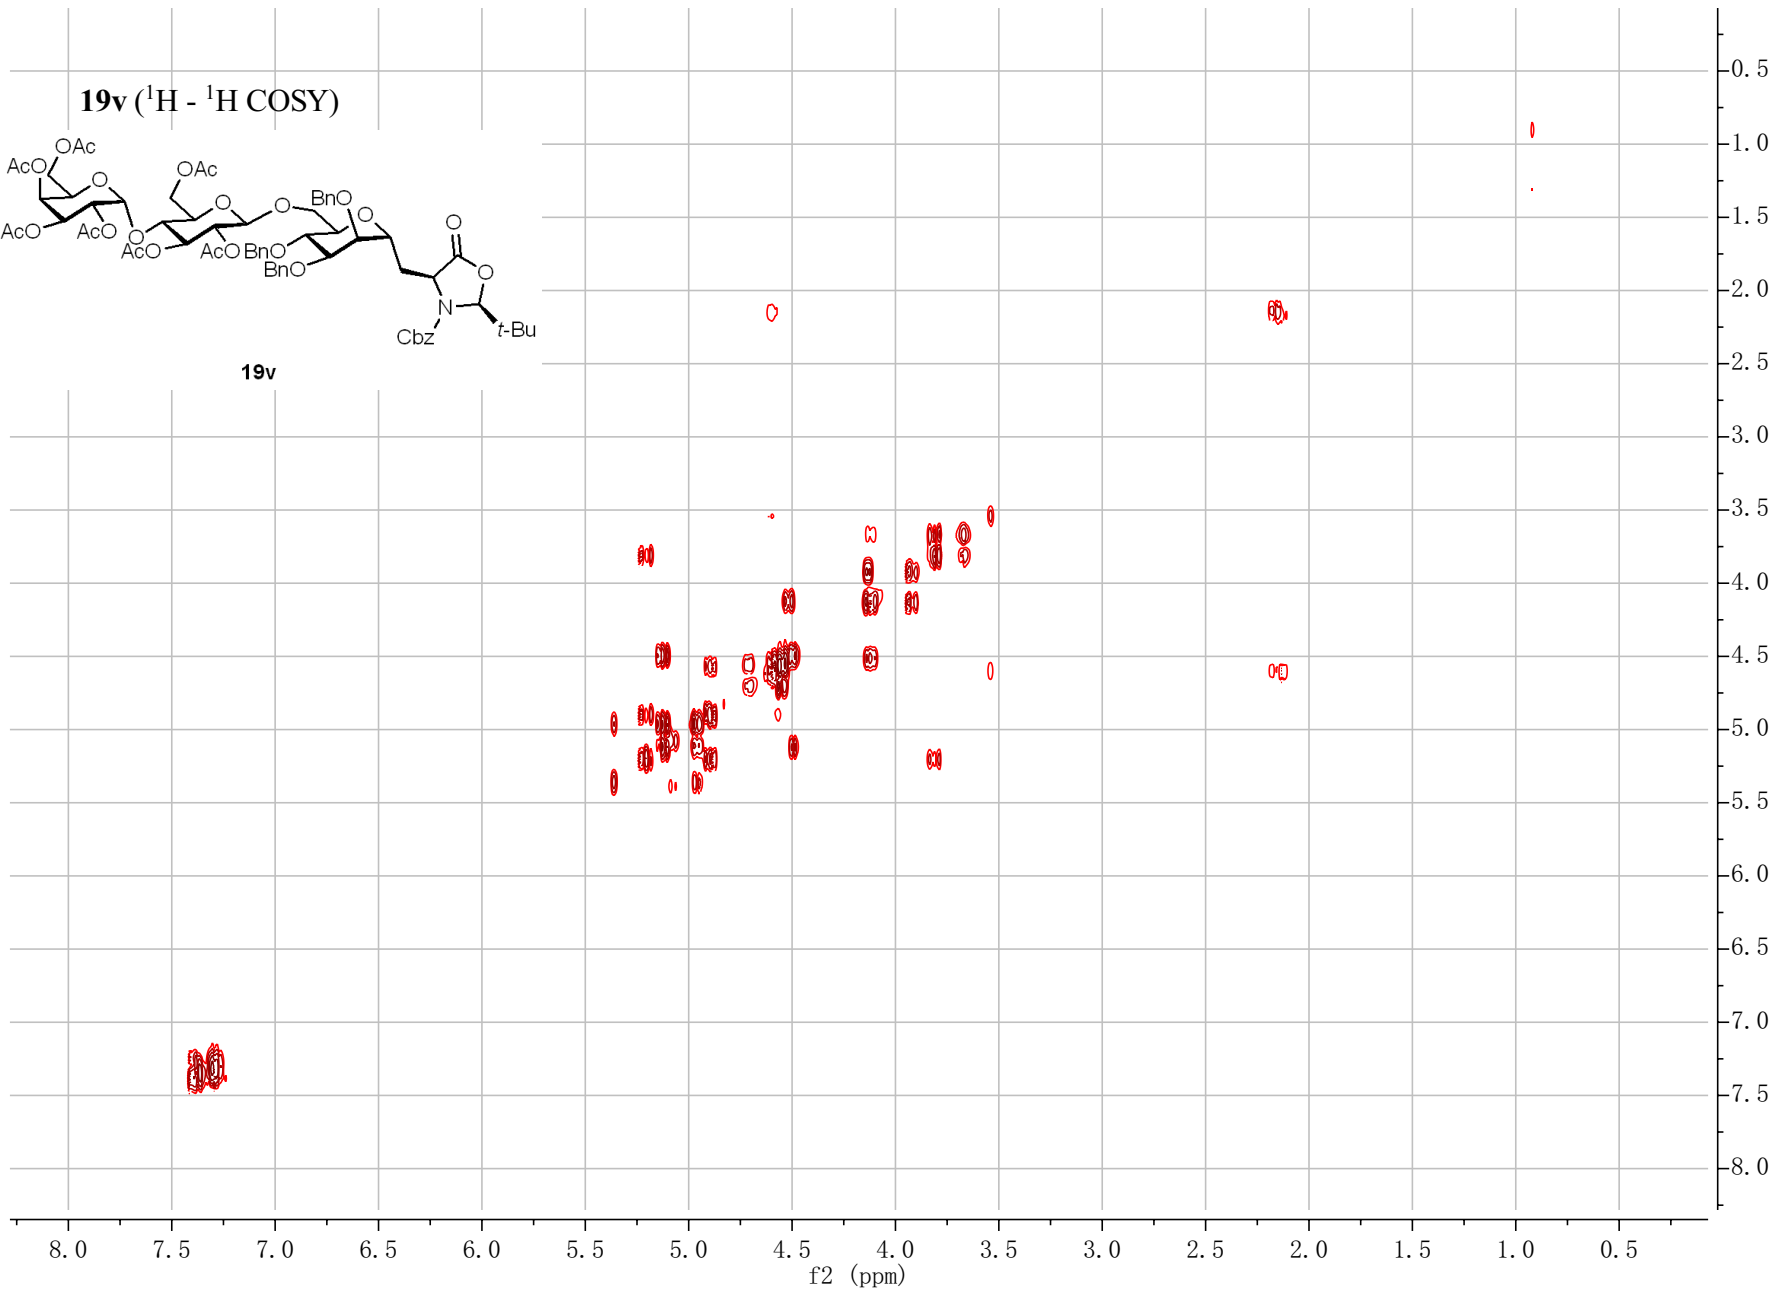

S182

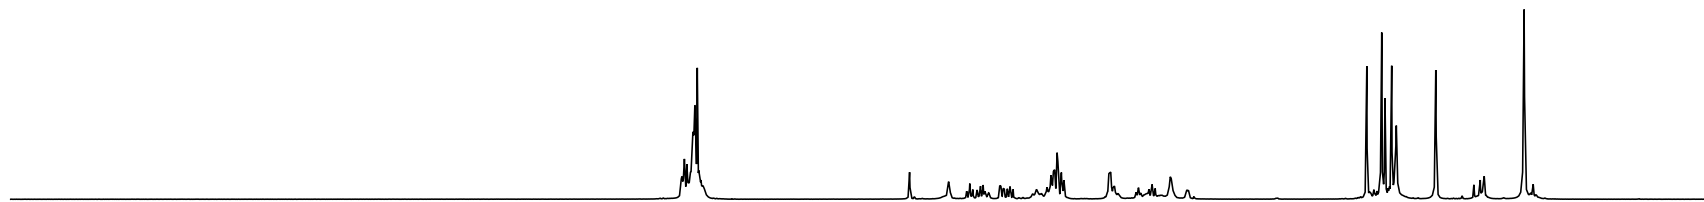

**19v** ( $^1\text{H} - ^{13}\text{C}$  Coupled HSQC)

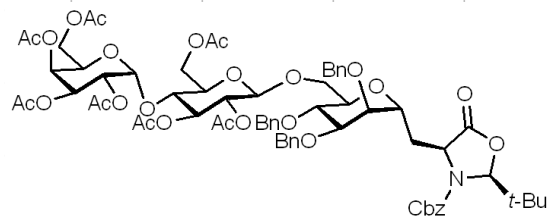

**19v**

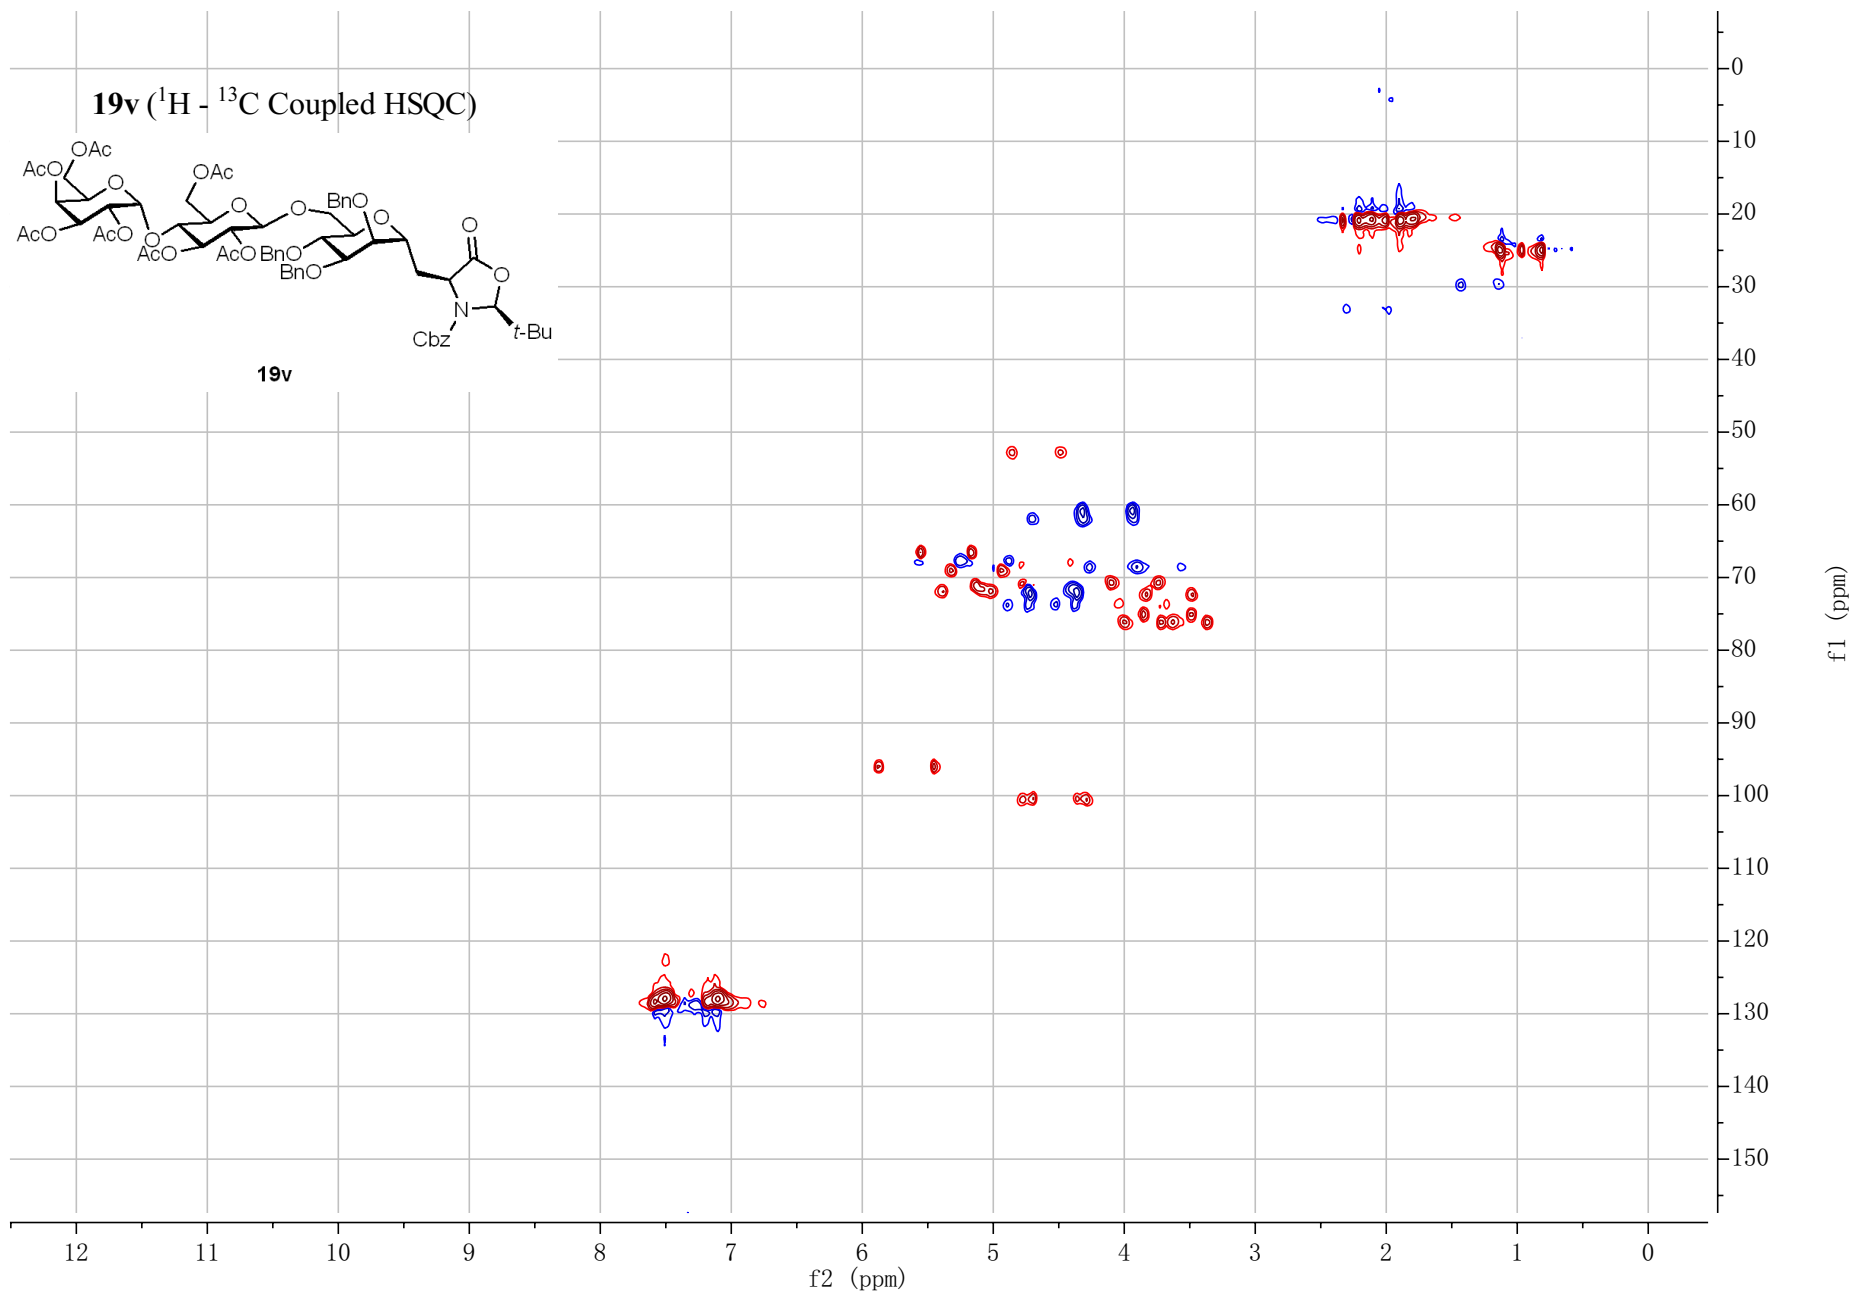

S183

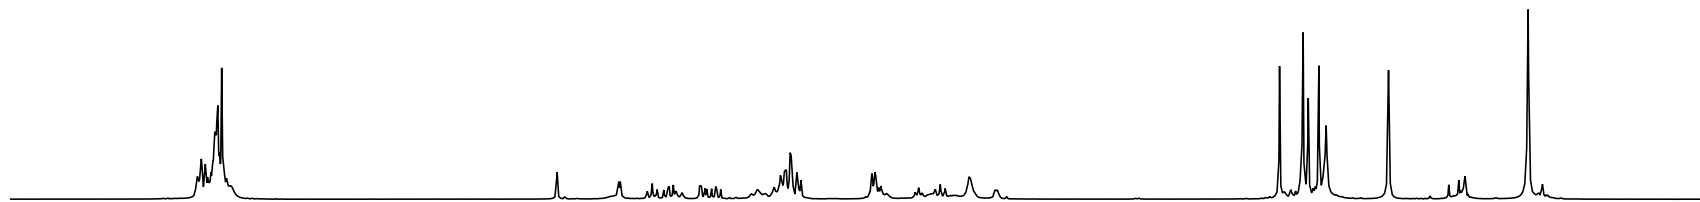

**19v** (<sup>1</sup>H - <sup>13</sup>C HSQC)

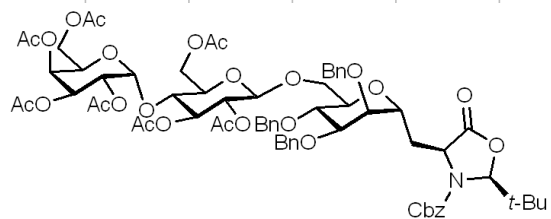

**19v**

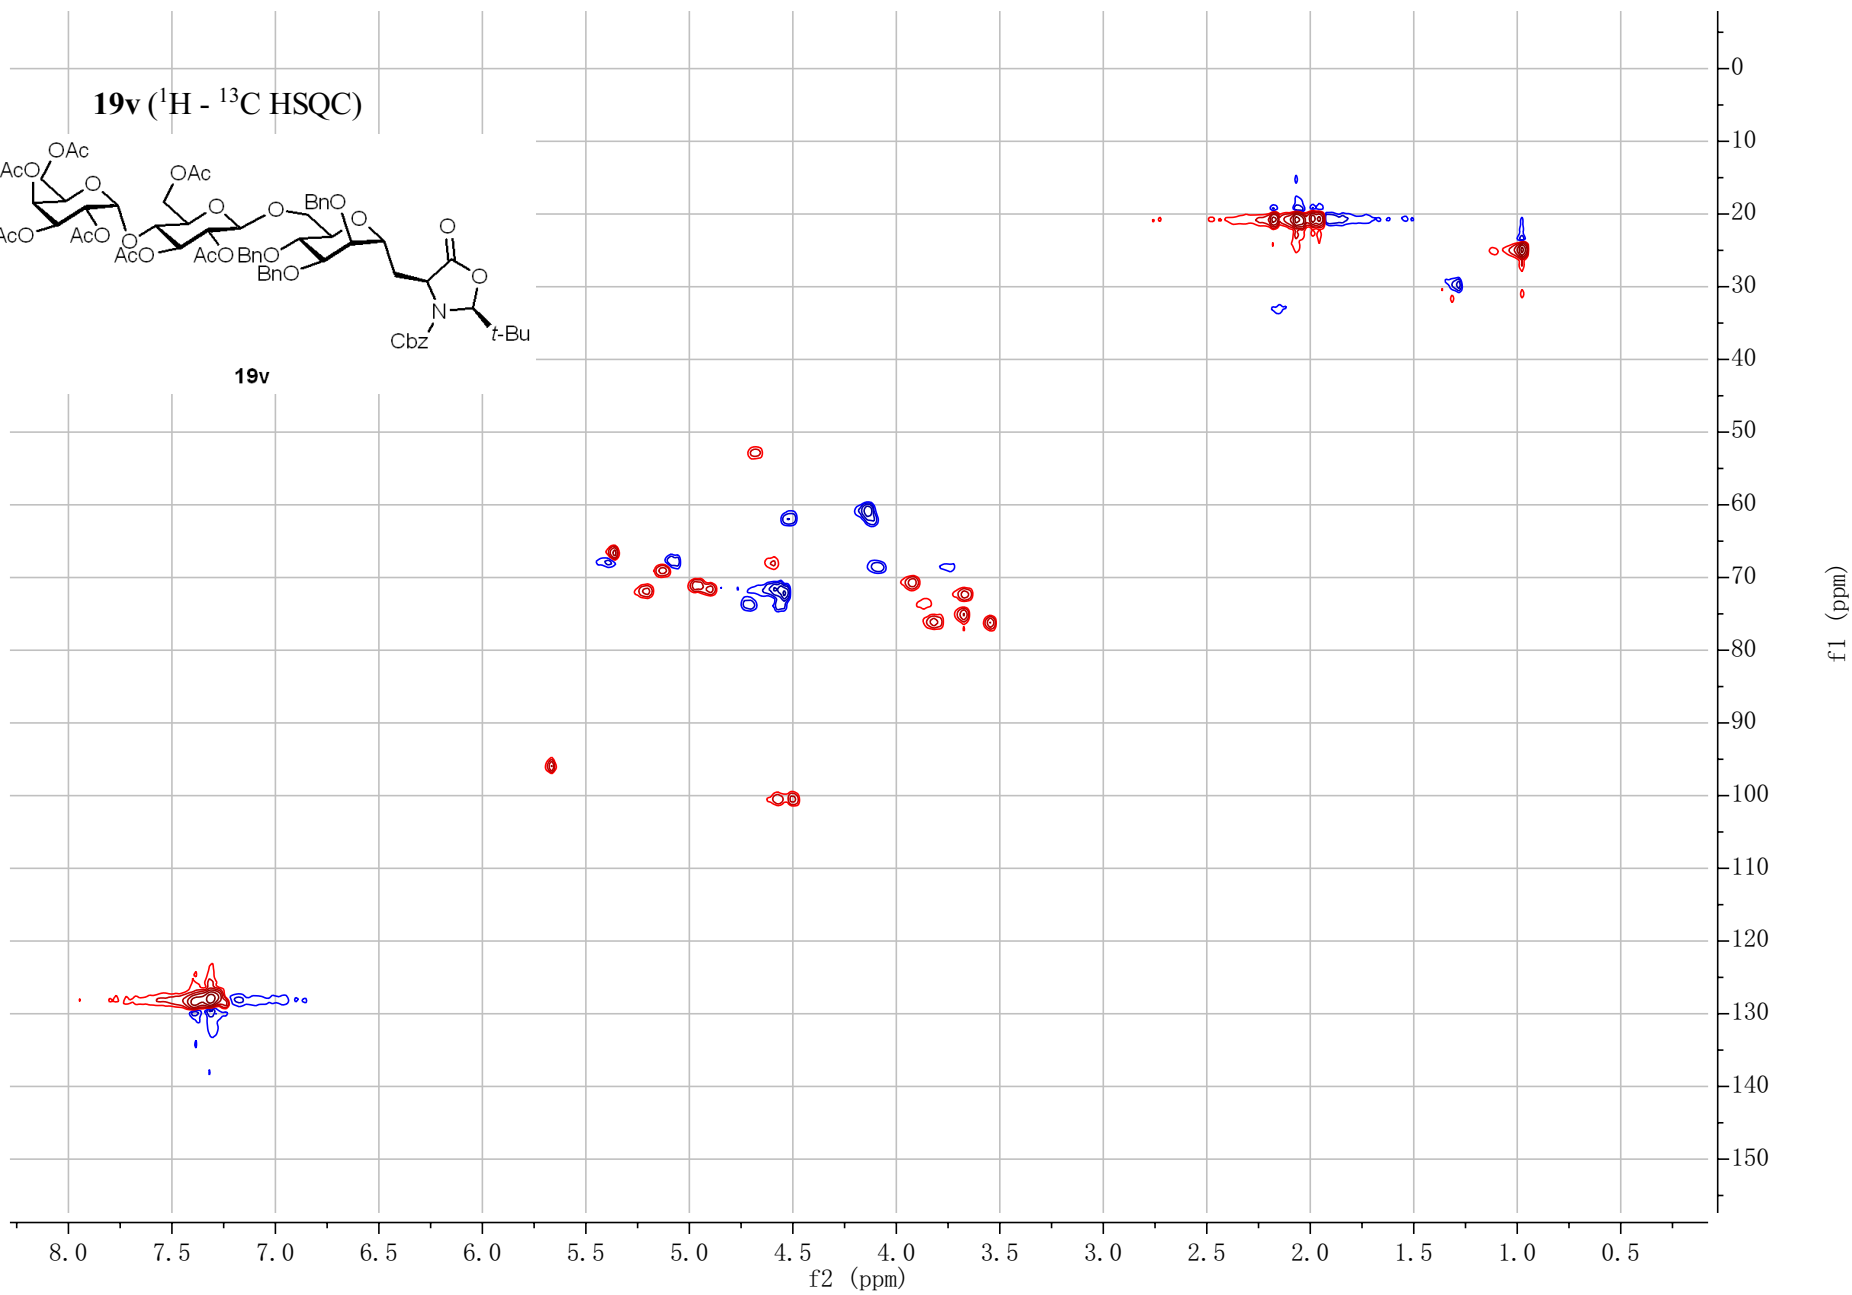

S184

7.92 7.92 7.90 7.90 7.88 7.86 7.77 7.75 7.75 7.40 7.40 7.38 7.38 7.36 7.35 7.35 7.34 7.33 7.32 7.31 7.30 7.29 7.28 7.27 7.27 7.26 7.24 7.23 7.22 5.83 5.42 5.34 5.33 5.25 5.10 5.08 4.93 4.92 4.55 4.51 4.49 4.48 4.47 4.44 4.42 4.41 4.41 4.08 3.99 3.97 3.86 2.14 2.06 2.04 2.03 2.03 2.00 1.96 0.89

**19w** (<sup>1</sup>H NMR, 400MHz, CDCl<sub>3</sub>)

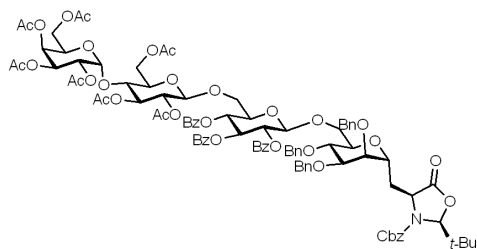

**19w**

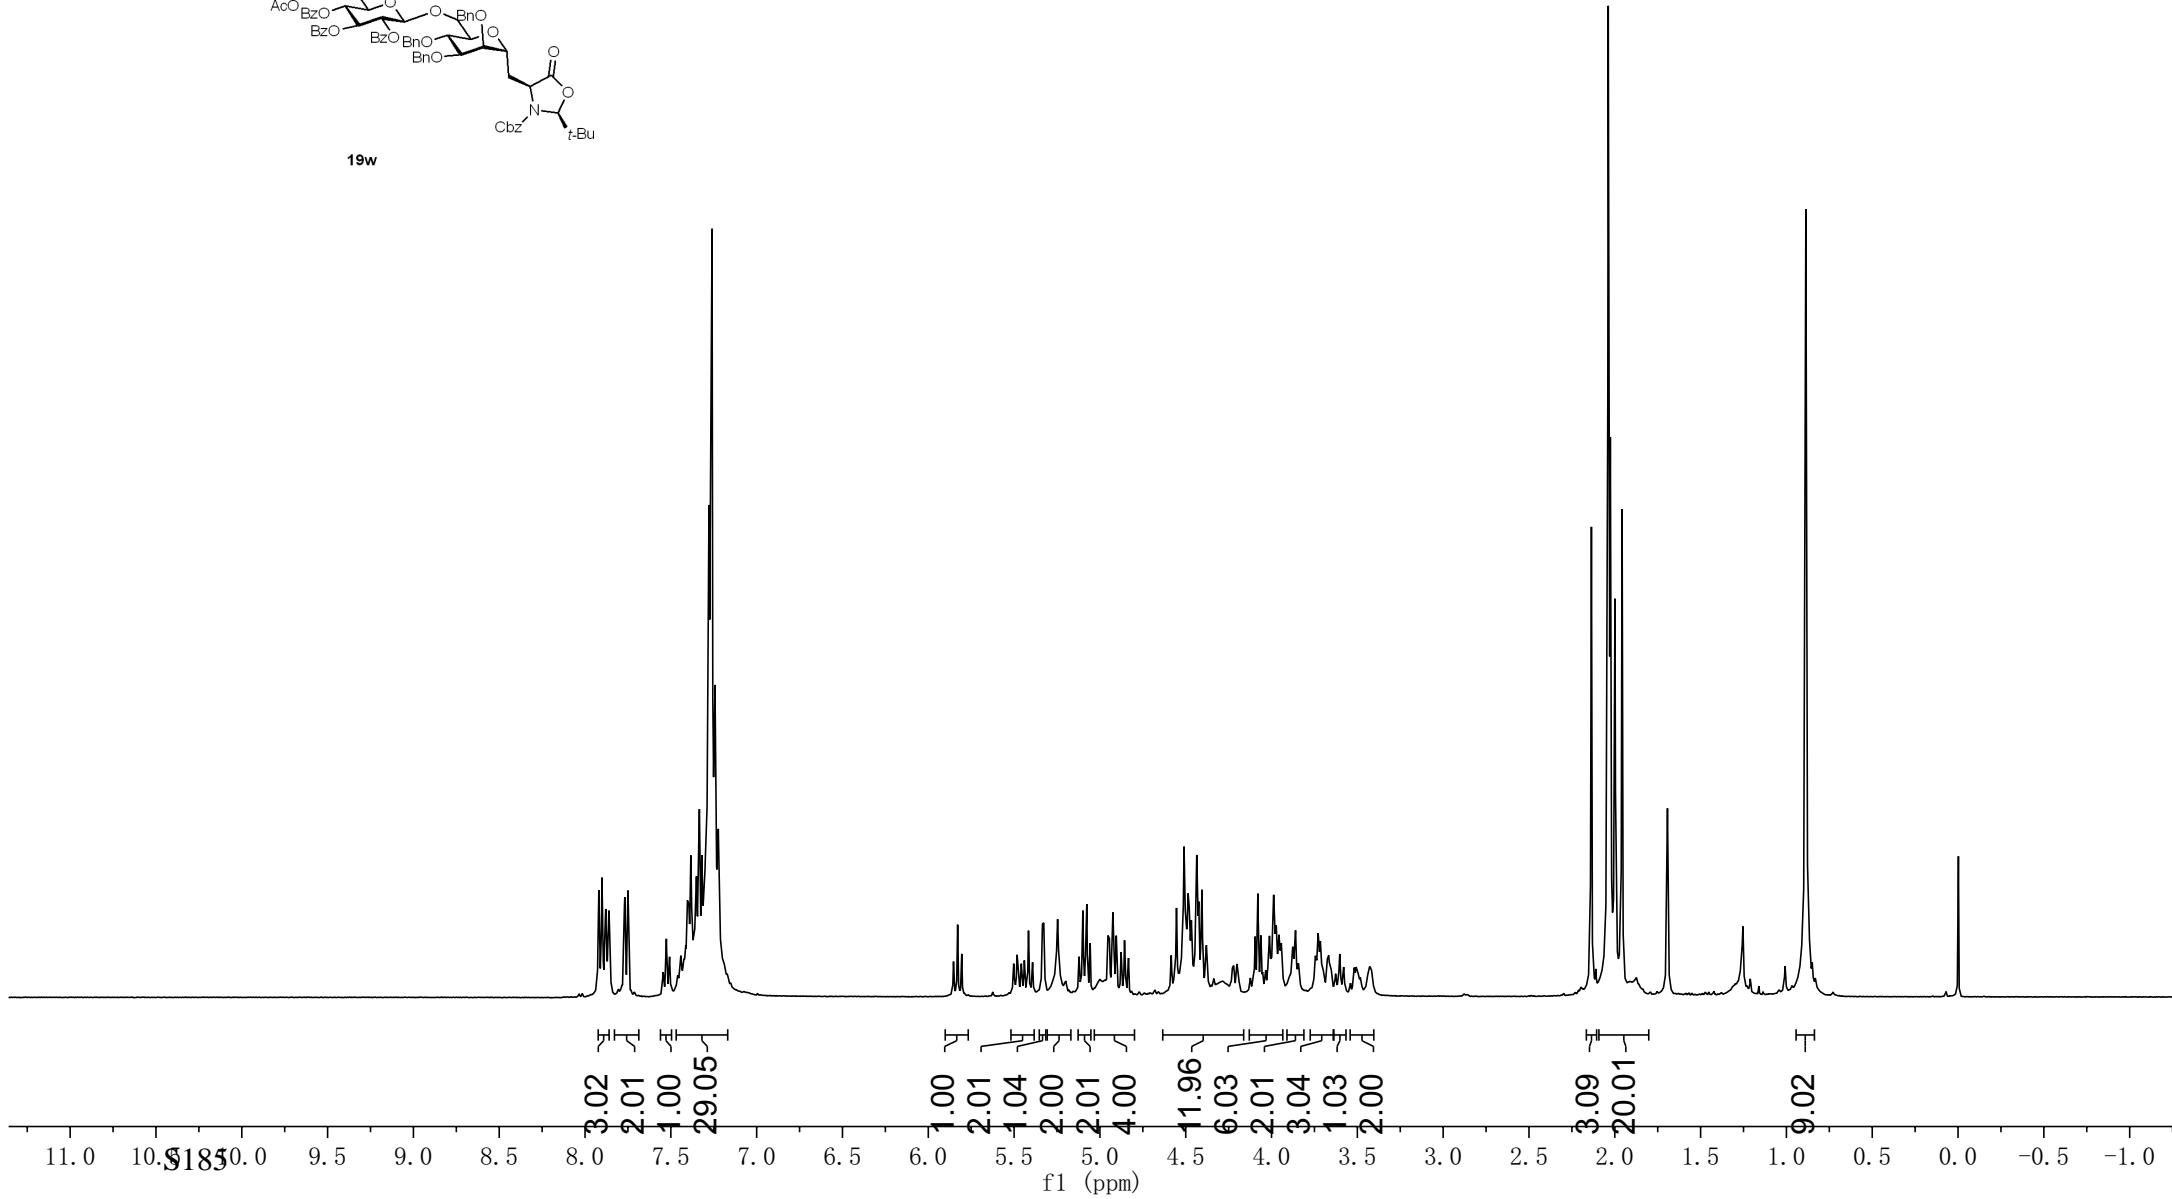

172.16  
 170.51  
 170.48  
 170.31  
 170.19  
 169.83  
 169.21  
 165.80  
 165.24  
 155.23  
 138.56  
 138.29  
 133.58  
 133.23  
 129.94  
 129.79  
 128.98  
 128.68  
 128.58  
 128.49  
 128.45  
 128.40  
 128.34  
 128.12  
 127.91  
 127.78  
 127.74  
 127.69  
 127.67  
 101.16  
 100.78  
 95.81  
 77.48  
 77.16  
 76.84  
 76.40  
 73.55  
 73.20  
 72.76  
 72.60  
 72.08  
 71.99  
 71.68  
 71.21  
 71.13  
 70.69  
 69.70  
 69.12  
 66.72  
 60.91  
 37.11  
 24.98  
 20.94  
 20.91  
 20.85  
 20.78  
 20.76  
 20.74  
 20.65

**19w** (<sup>13</sup>C NMR, 101MHz, CDCl<sub>3</sub>)

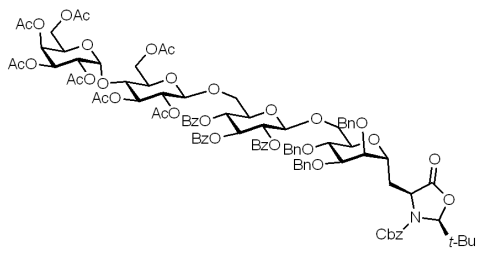

**19w**

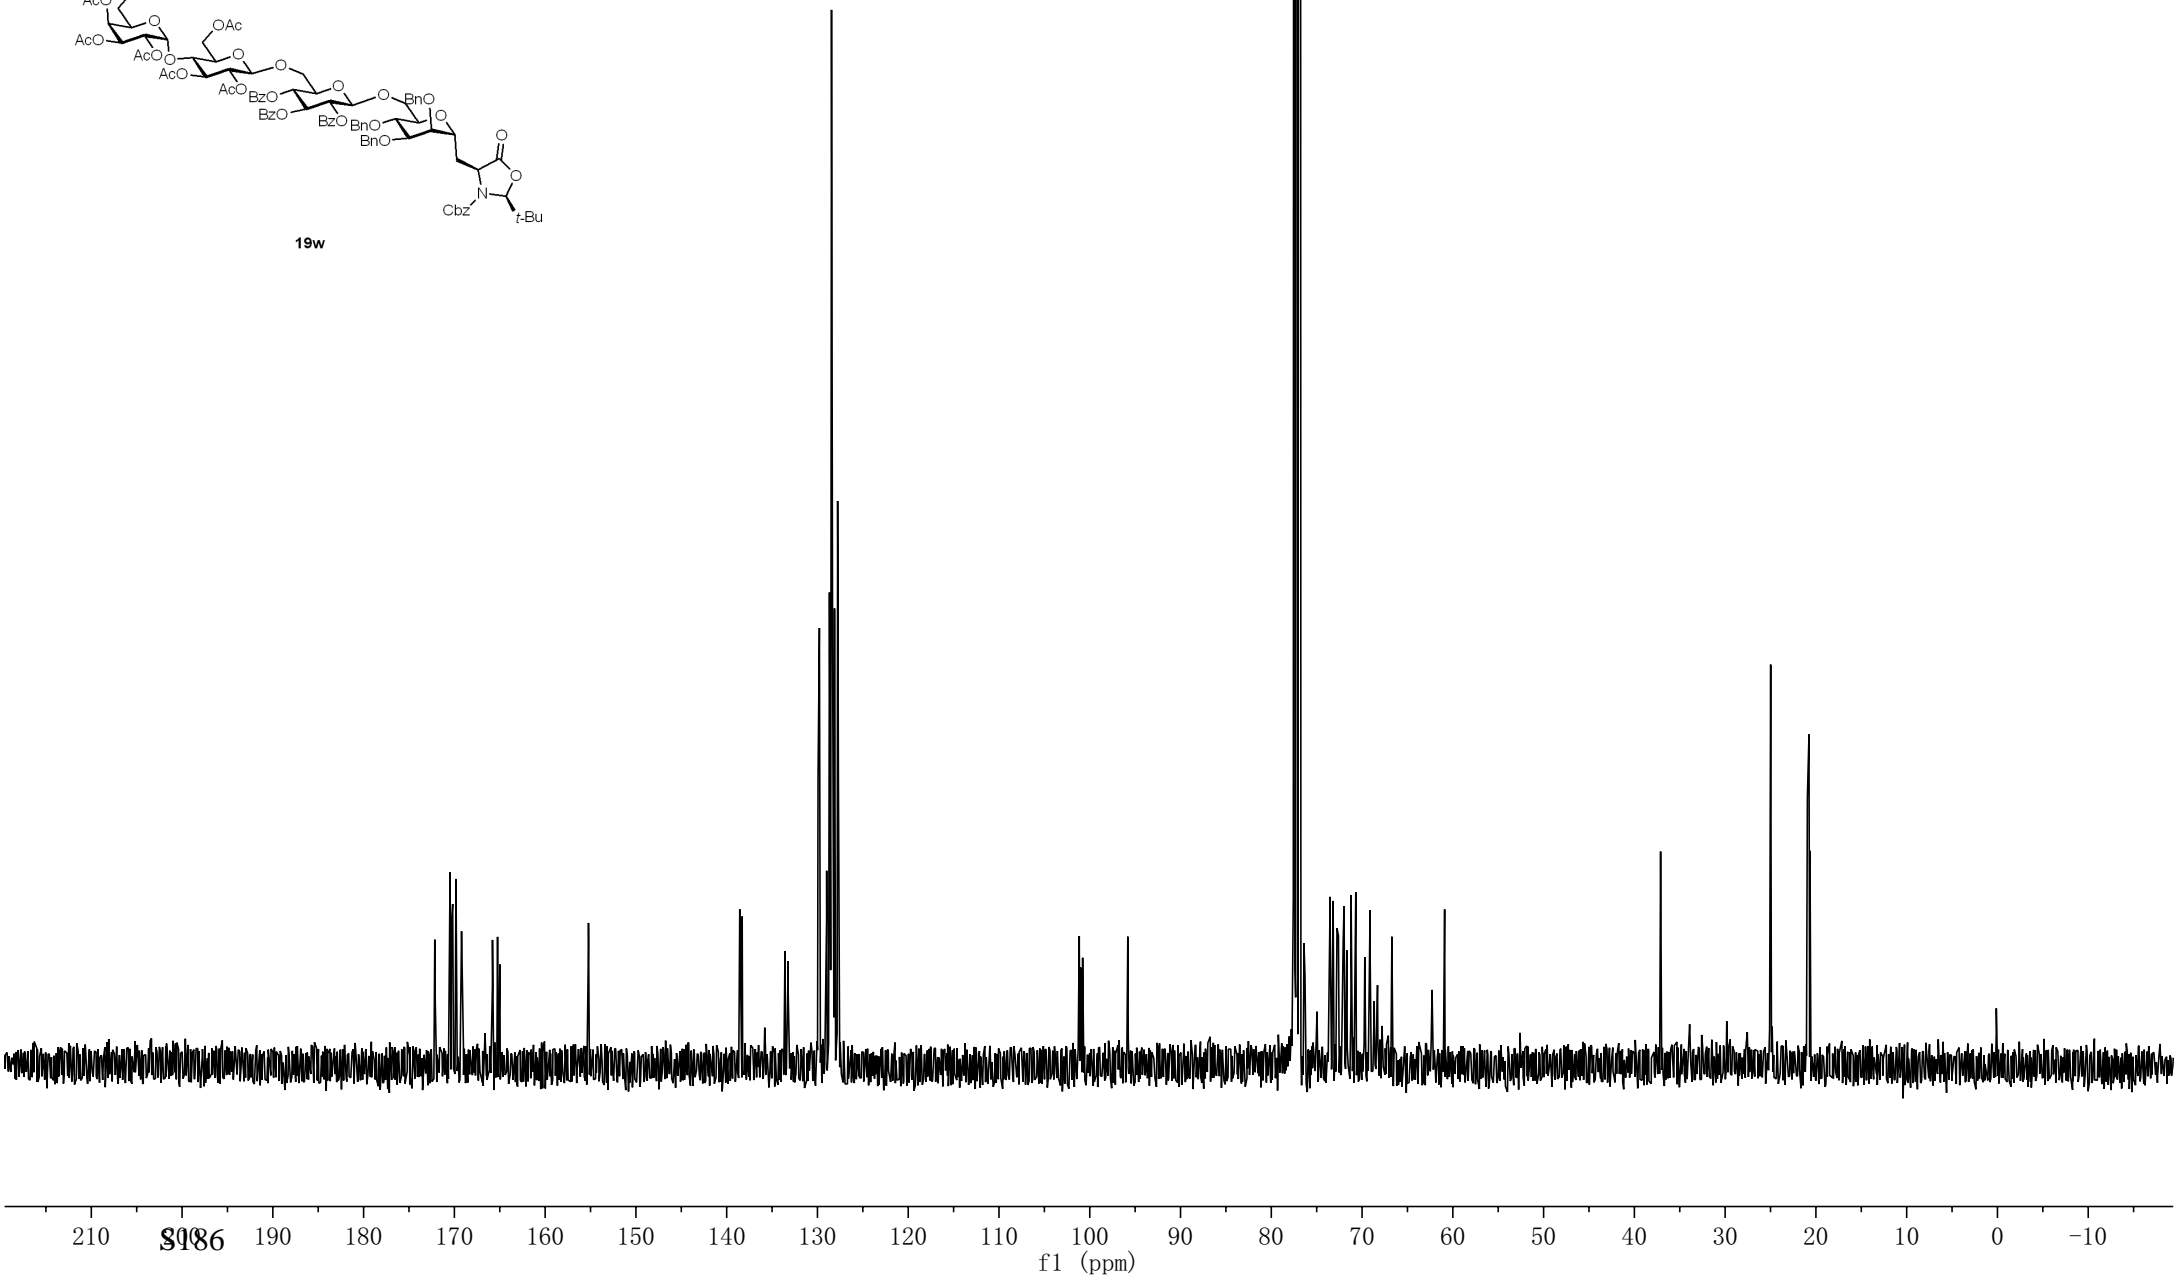

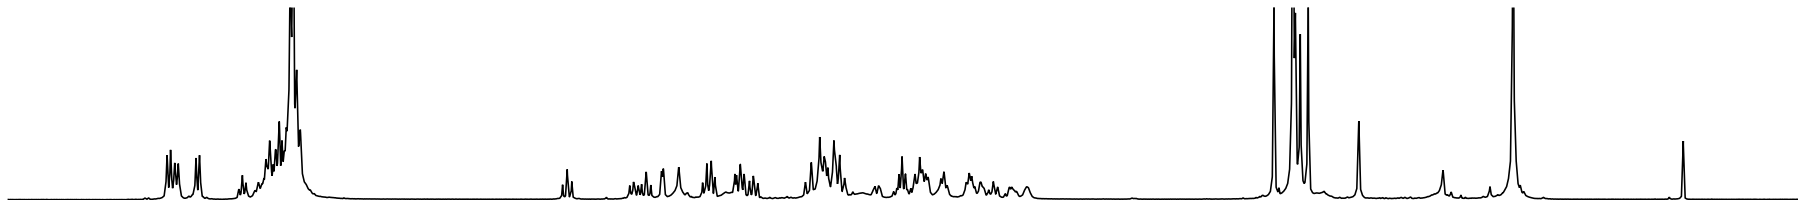

**19w** ( $^1\text{H} - ^1\text{H}$  COSY)

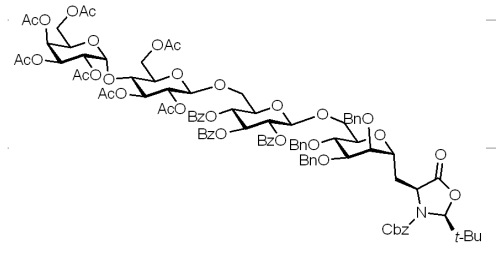

**19w**

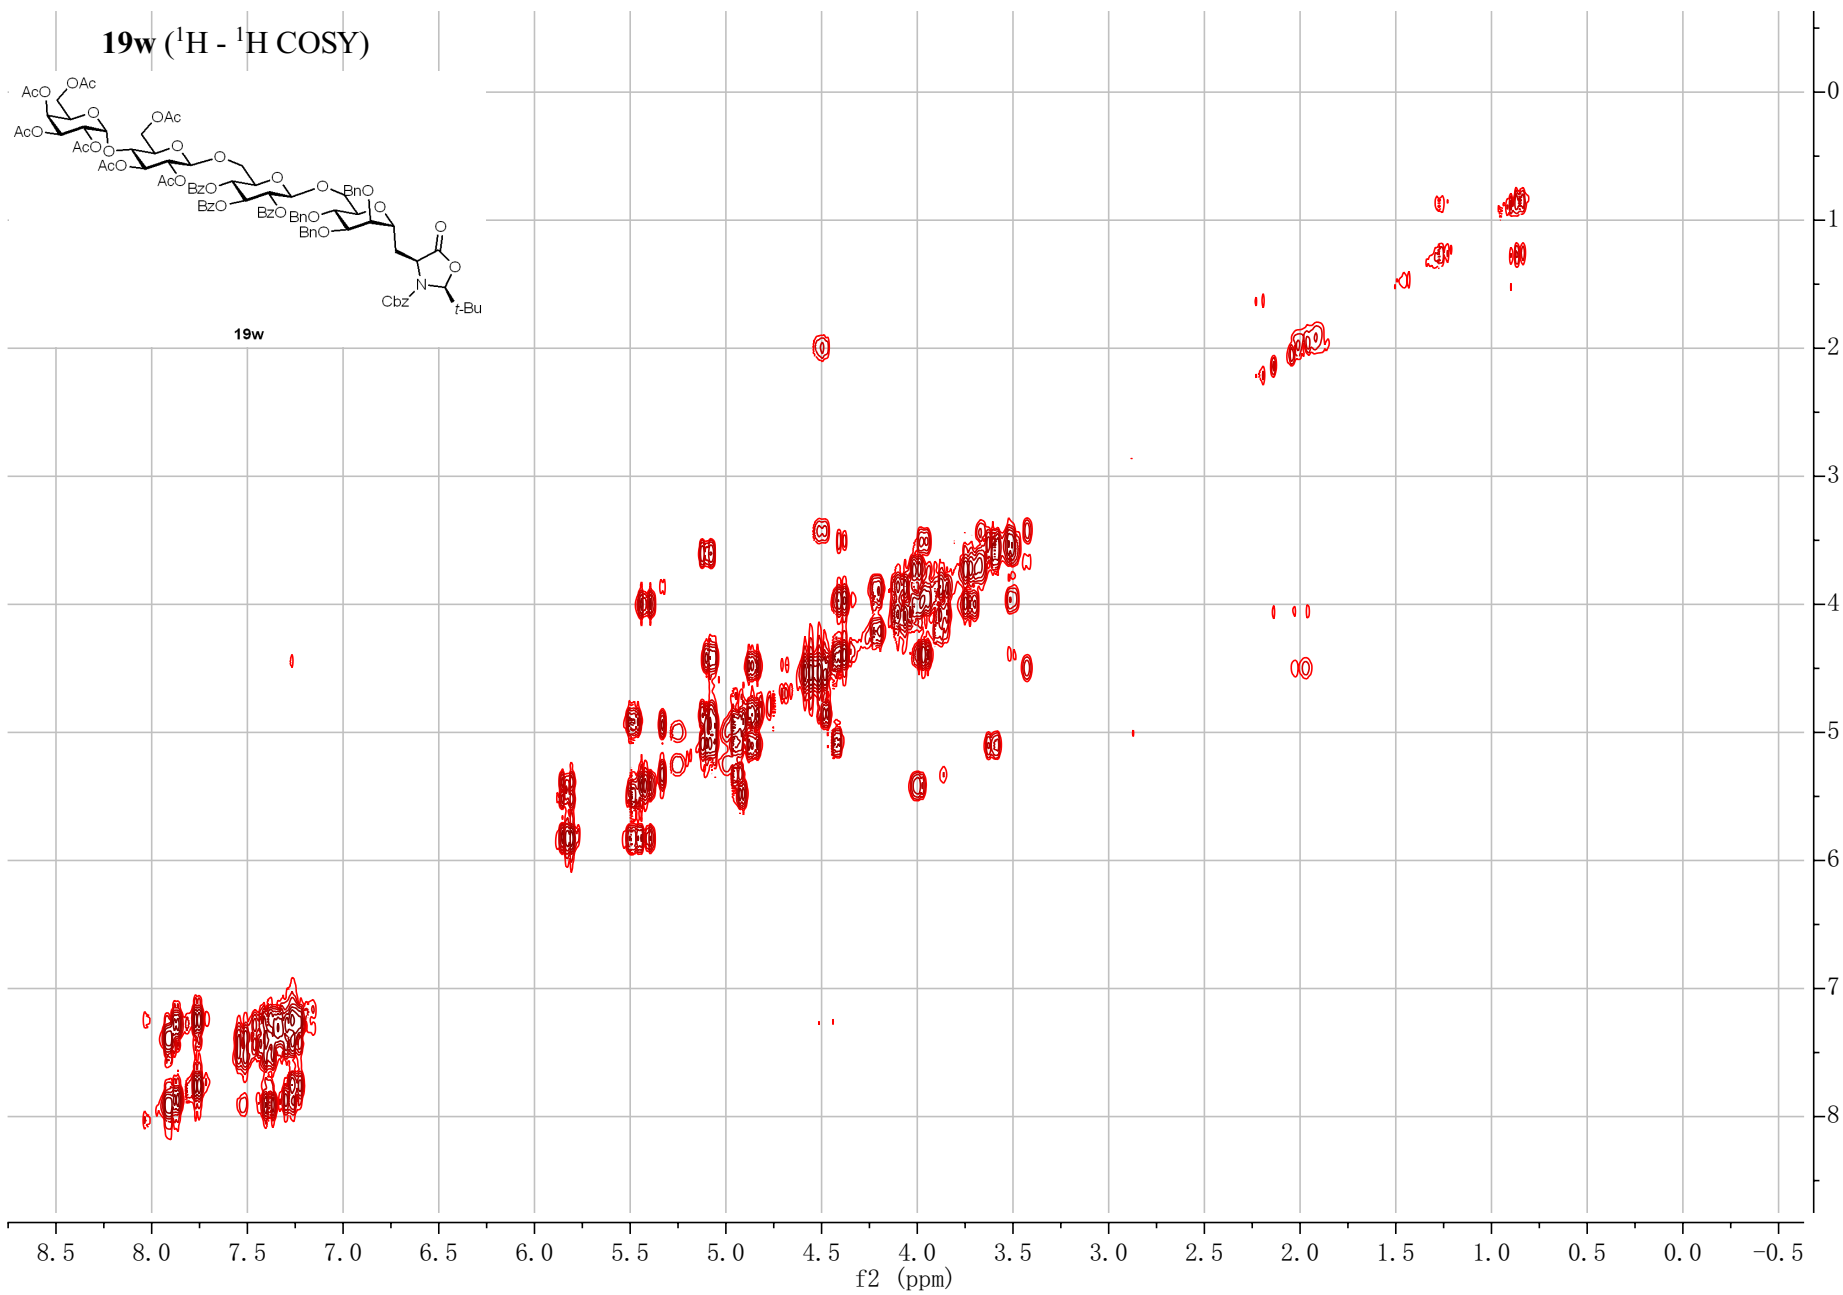

S187

f2 (ppm)

f1 (ppm)

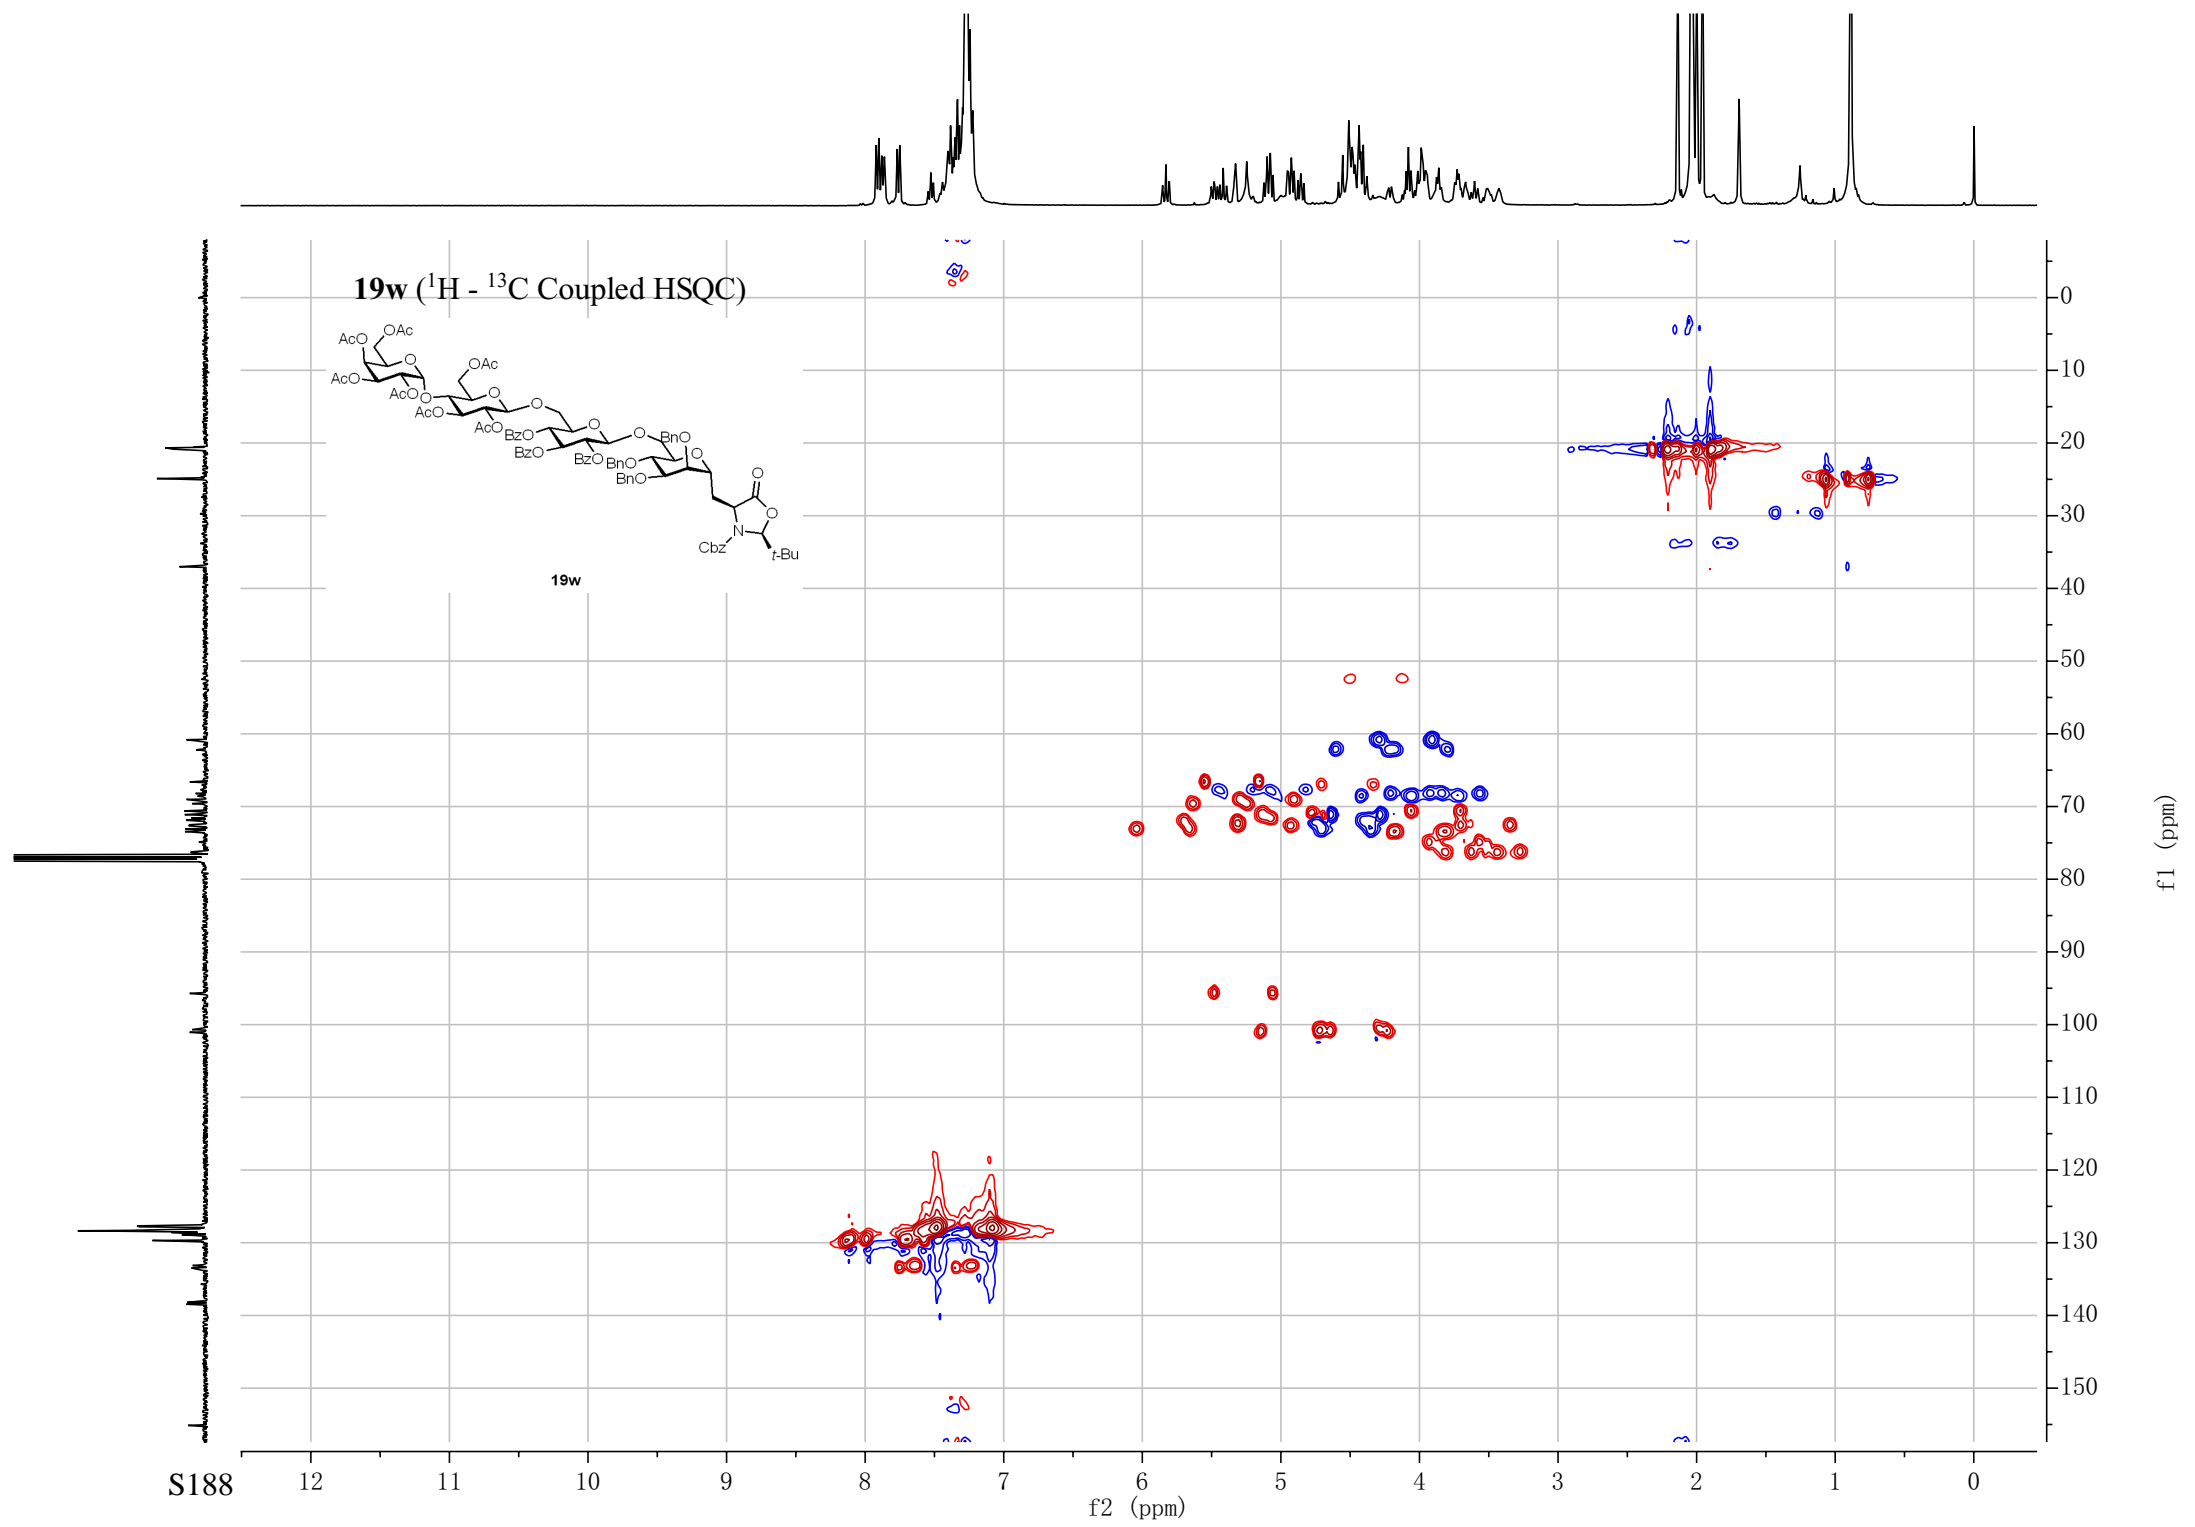

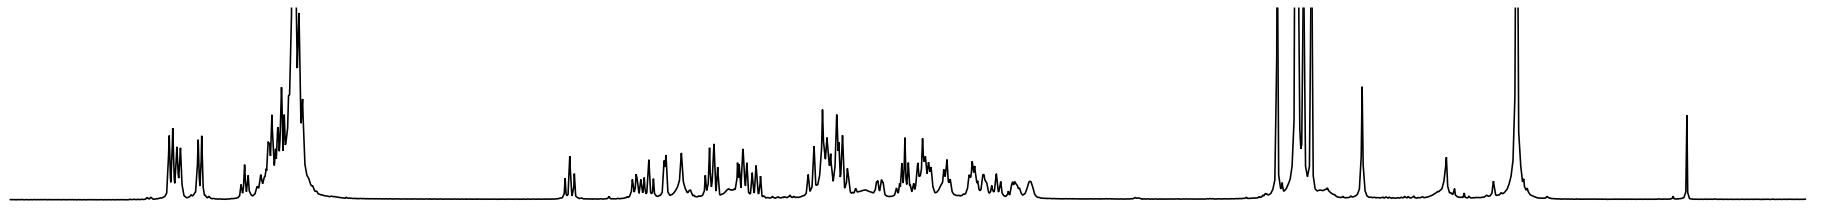

**19w** ( $^1\text{H} - ^{13}\text{C}$  HSQC)

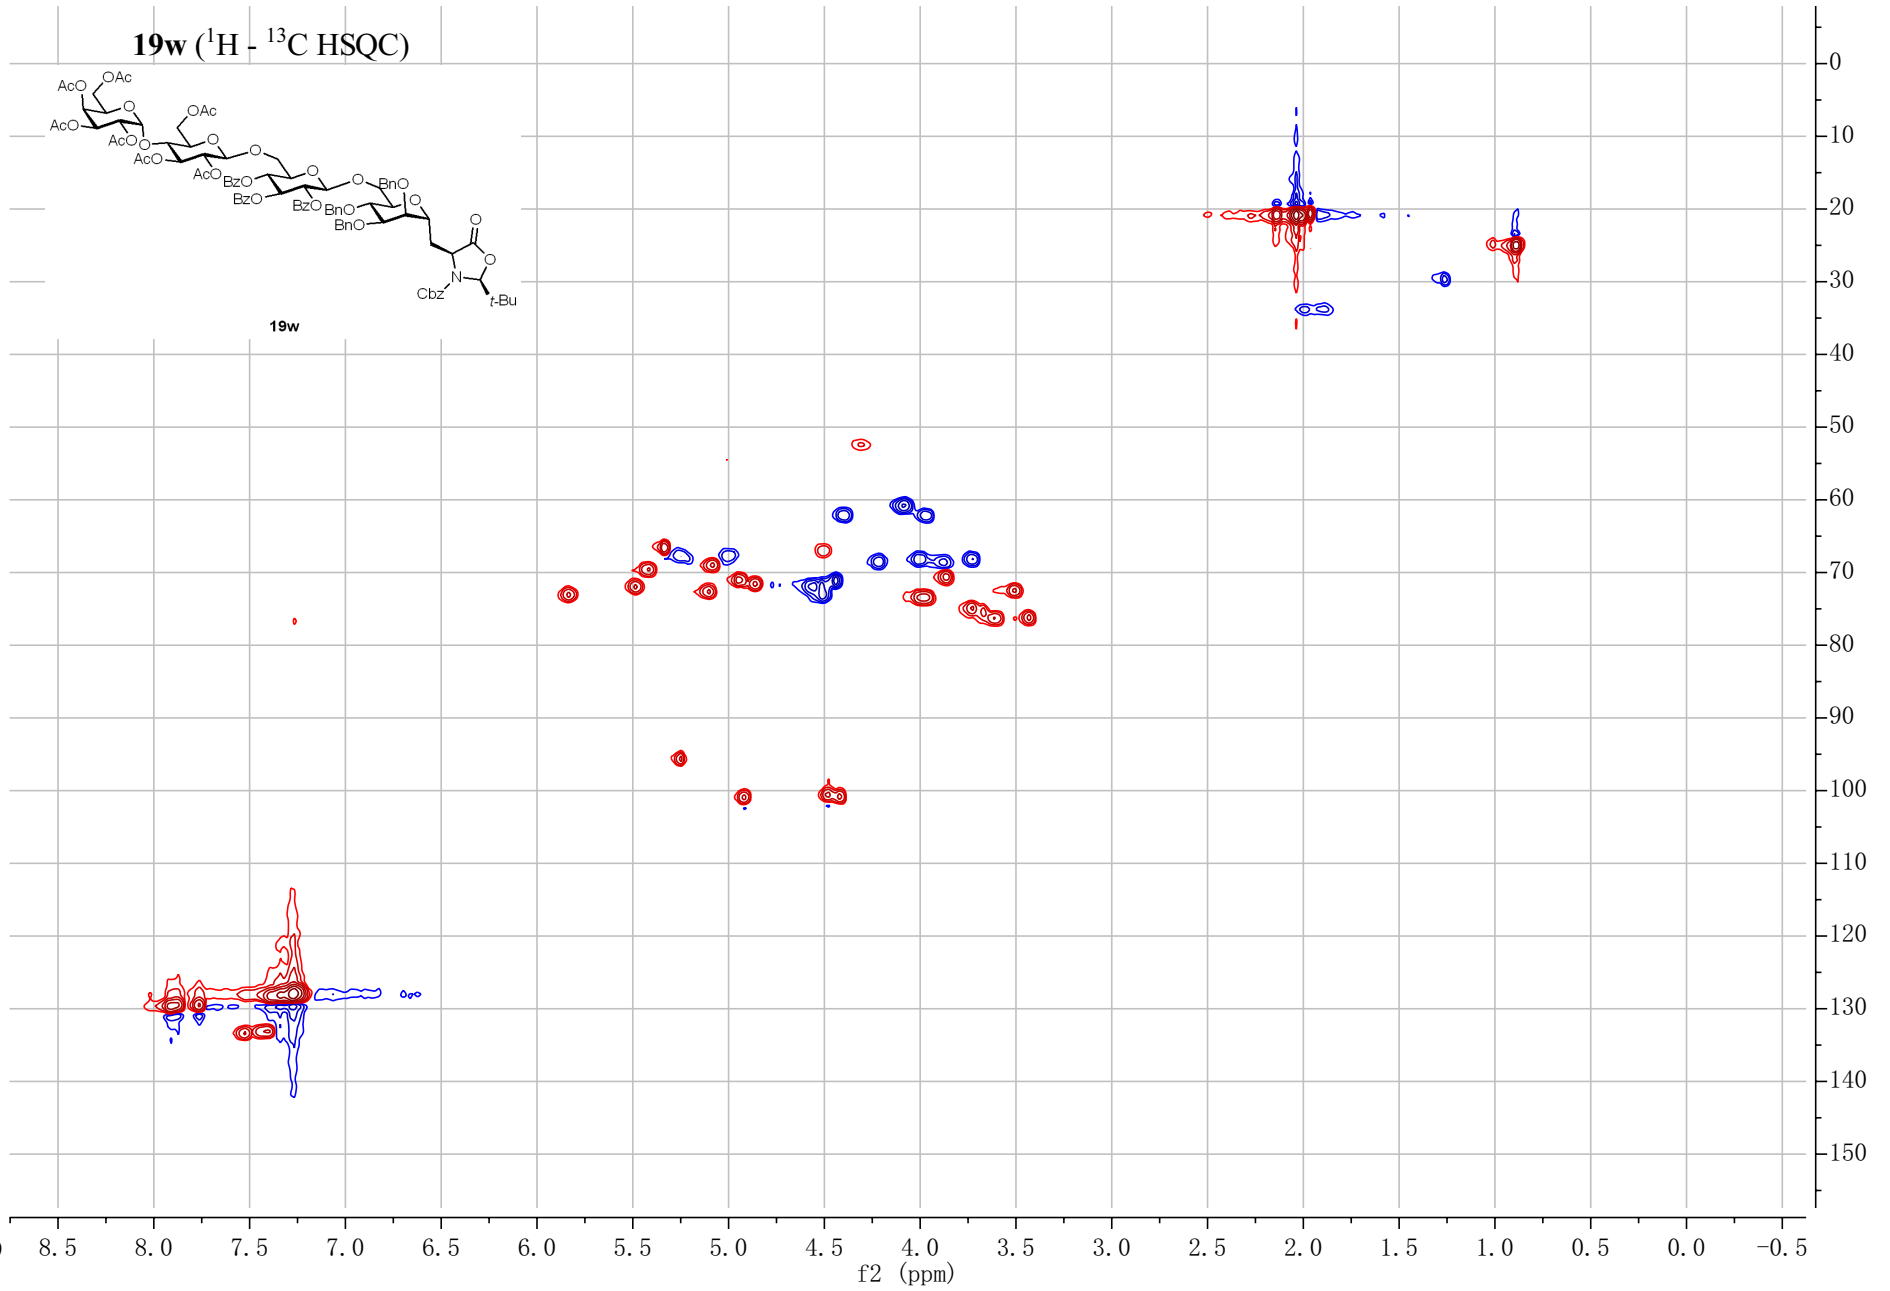



8.10  
8.09  
8.00  
7.99  
7.98  
7.97  
7.38  
7.37  
7.36  
7.35  
7.34  
7.34  
7.33  
7.33  
7.32  
7.32  
7.31  
7.30  
7.29  
7.29  
7.27  
7.26  
7.26  
7.25  
7.24  
6.98  
6.96  
5.55  
5.14  
4.84  
4.81  
4.69  
4.68  
4.67  
4.66  
4.64  
4.62  
4.61  
4.59  
4.58  
3.96  
3.94  
3.90  
3.89  
3.80  
3.79  
3.78  
3.62  
3.61  
3.60  
2.71  
2.23  
2.21  
2.19  
2.18  
1.89  
1.11  
1.09  
0.95

**19x** ( $^1\text{H}$  NMR, 400MHz,  $\text{CDCl}_3$ )

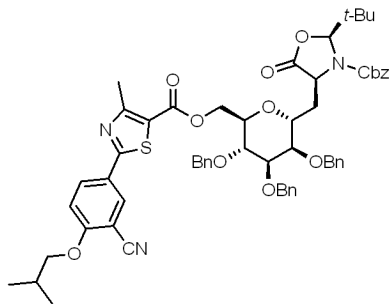

**19x**

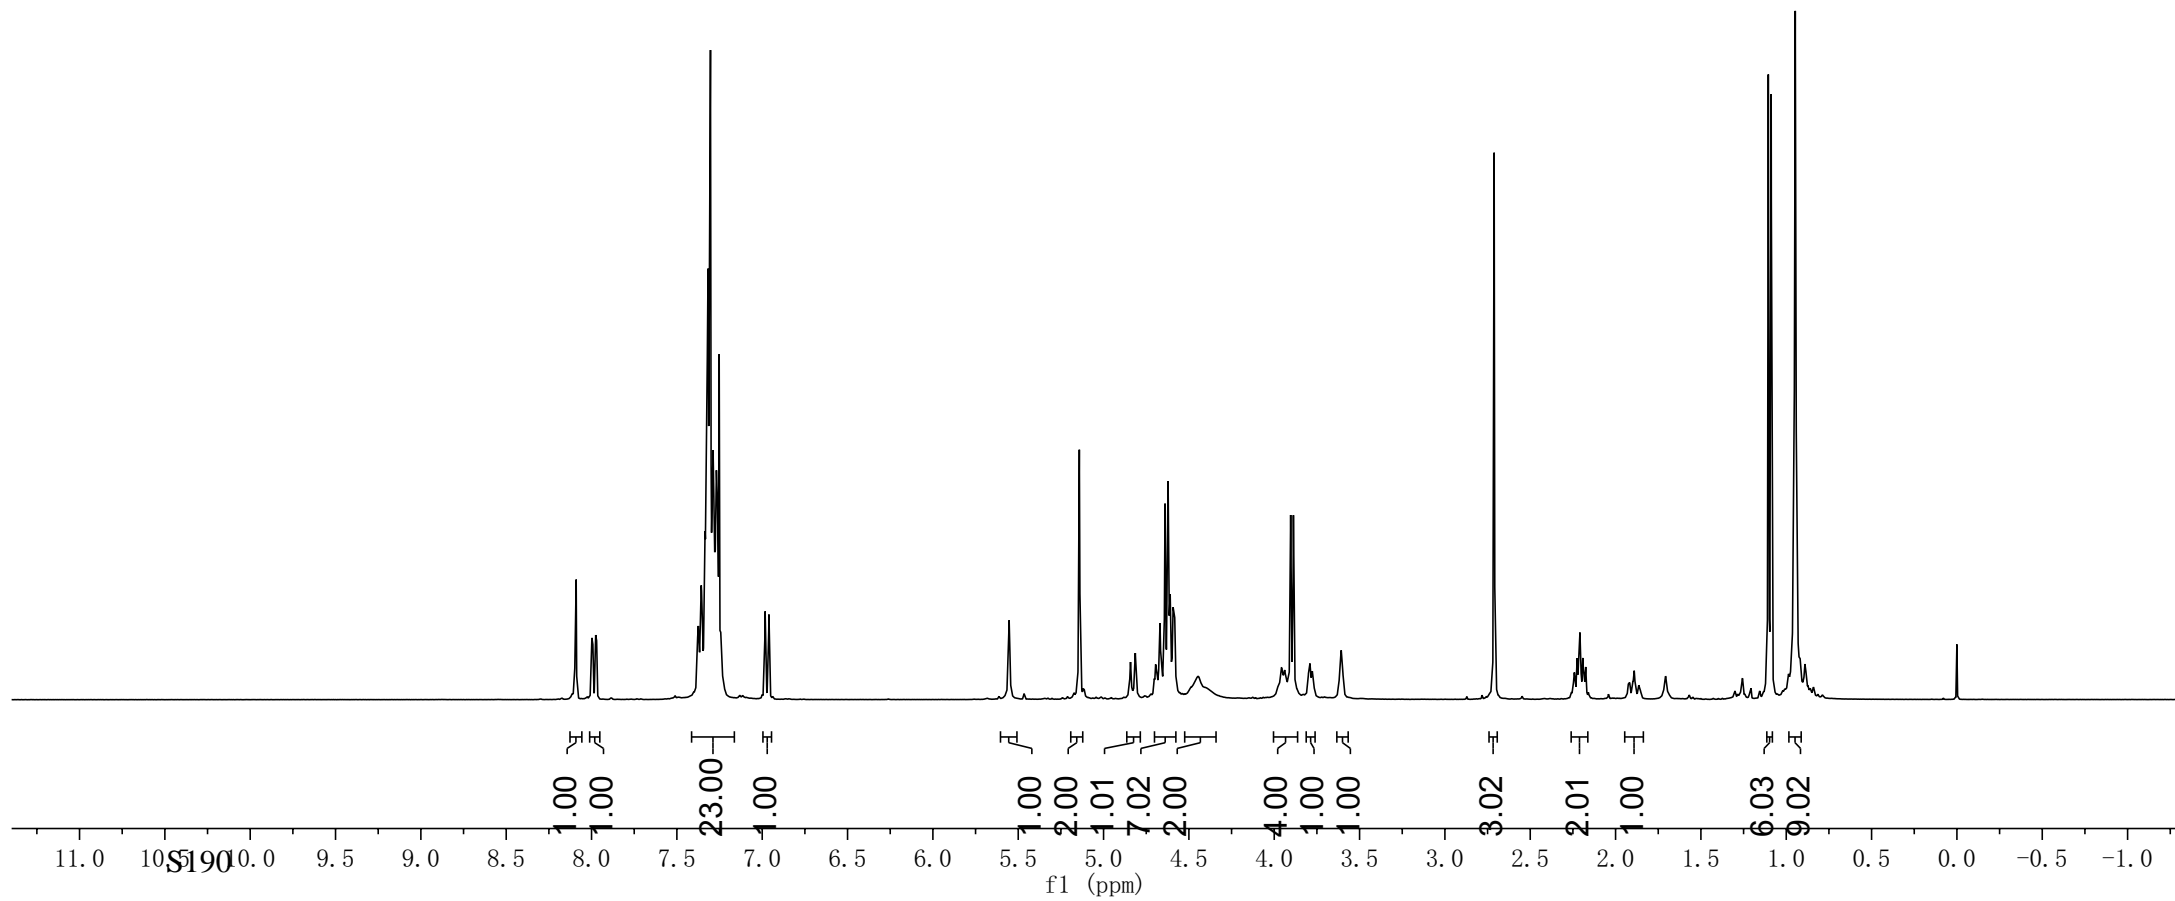

172.18  
167.32  
162.56  
161.75  
161.40  
155.64  
138.17  
138.13  
138.10  
135.11  
132.69  
132.12  
128.84  
128.78  
128.63  
128.55  
128.51  
128.42  
128.19  
128.05  
128.01  
127.93  
127.91  
127.73  
126.02  
121.83  
115.47  
112.65  
103.03  
96.13  
77.48  
77.16  
76.84  
76.19  
75.75  
74.47  
74.38  
72.36  
71.87  
71.54  
68.49  
63.91  
53.31

37.22  
33.00  
28.25  
24.93  
19.17  
17.63

**19x** ( $^{13}\text{C}$  NMR, 101MHz,  $\text{CDCl}_3$ )

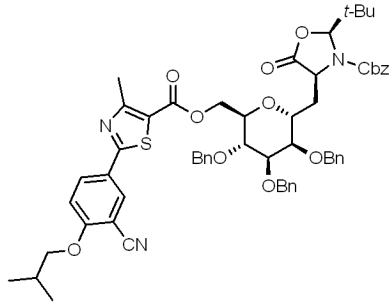

**19x**

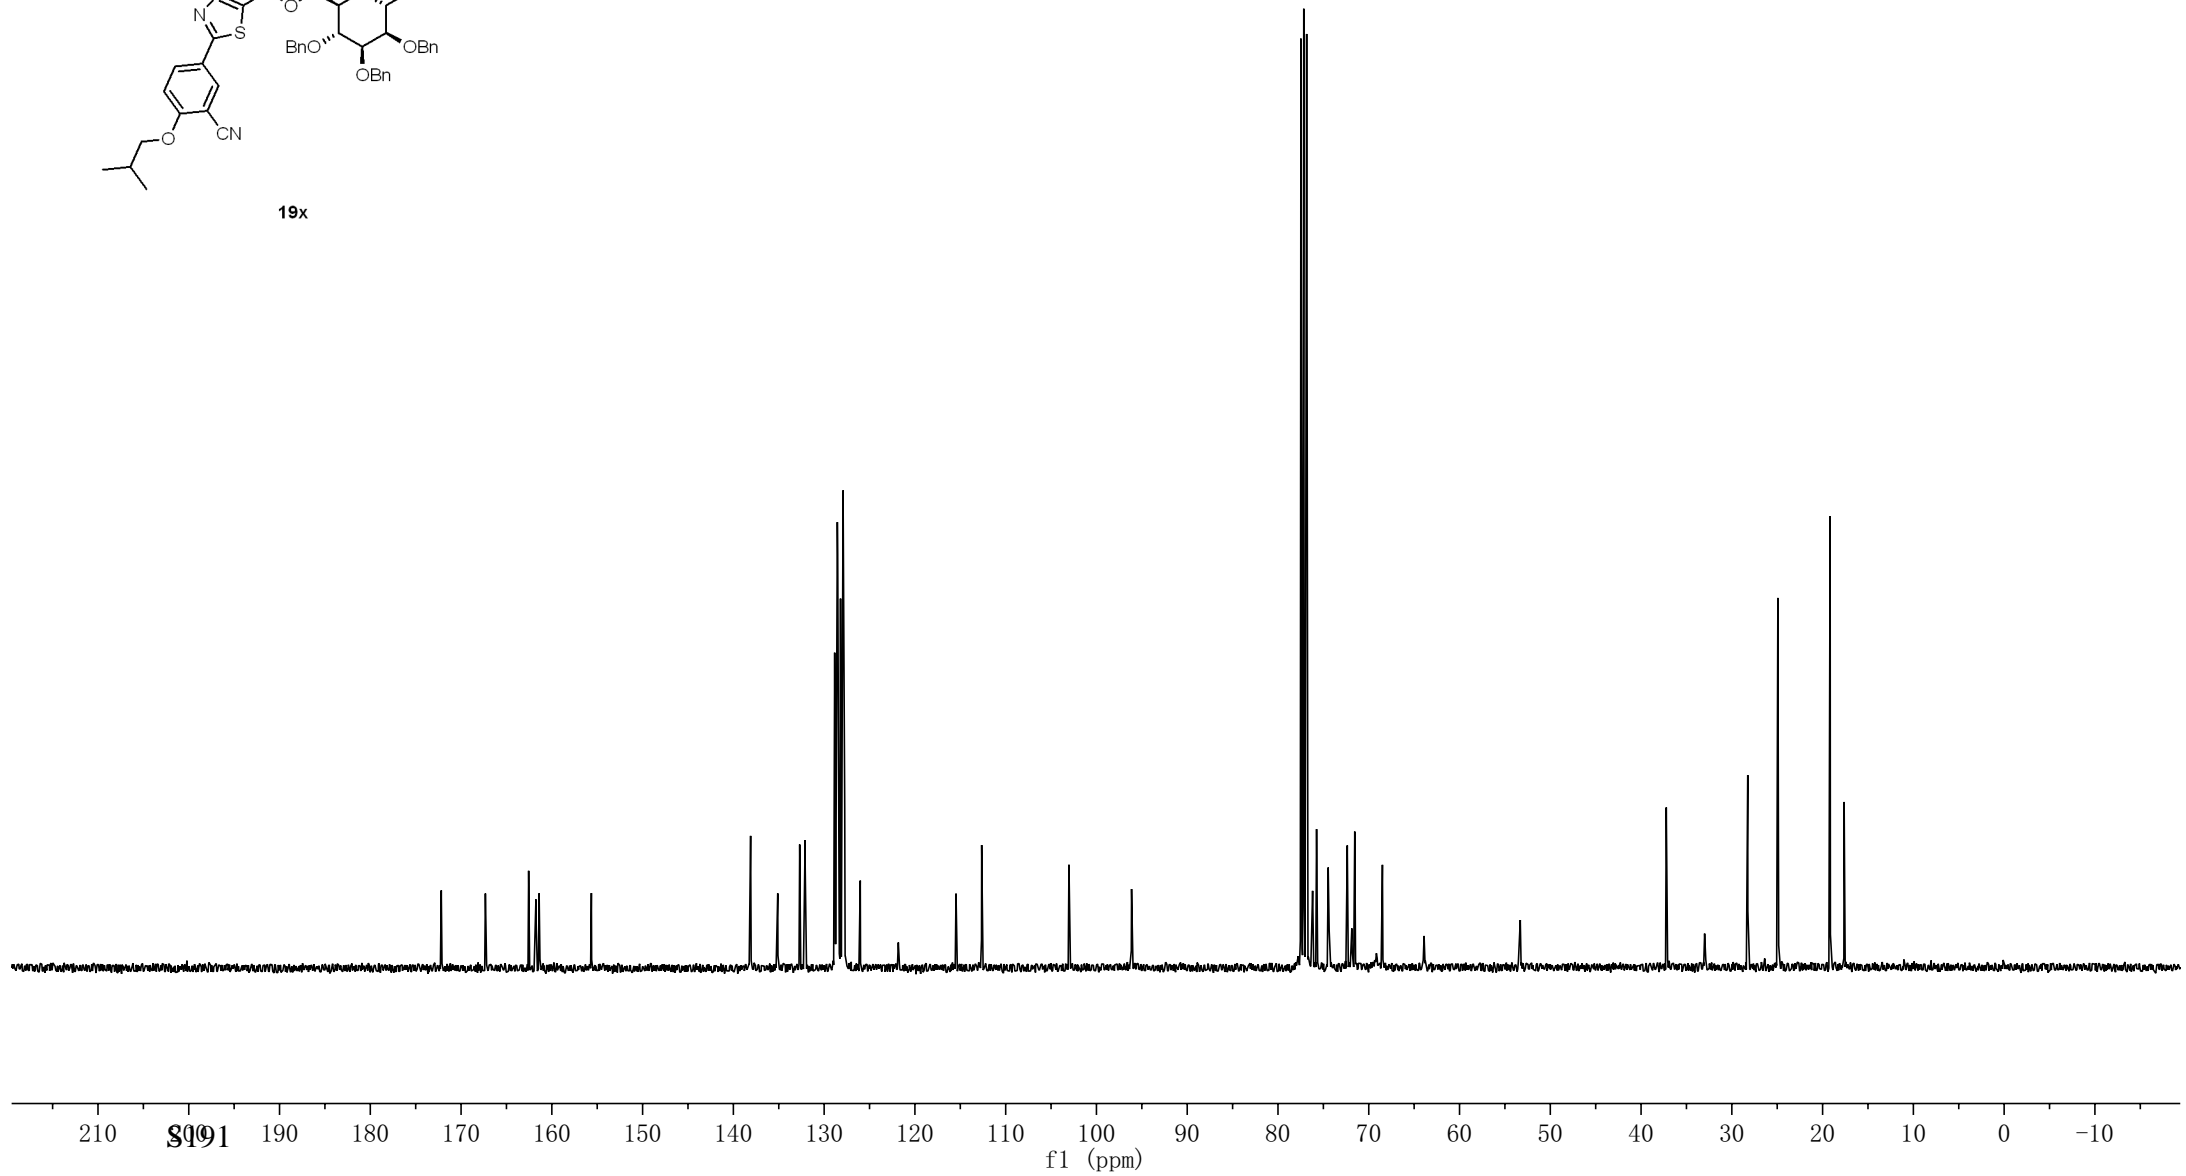



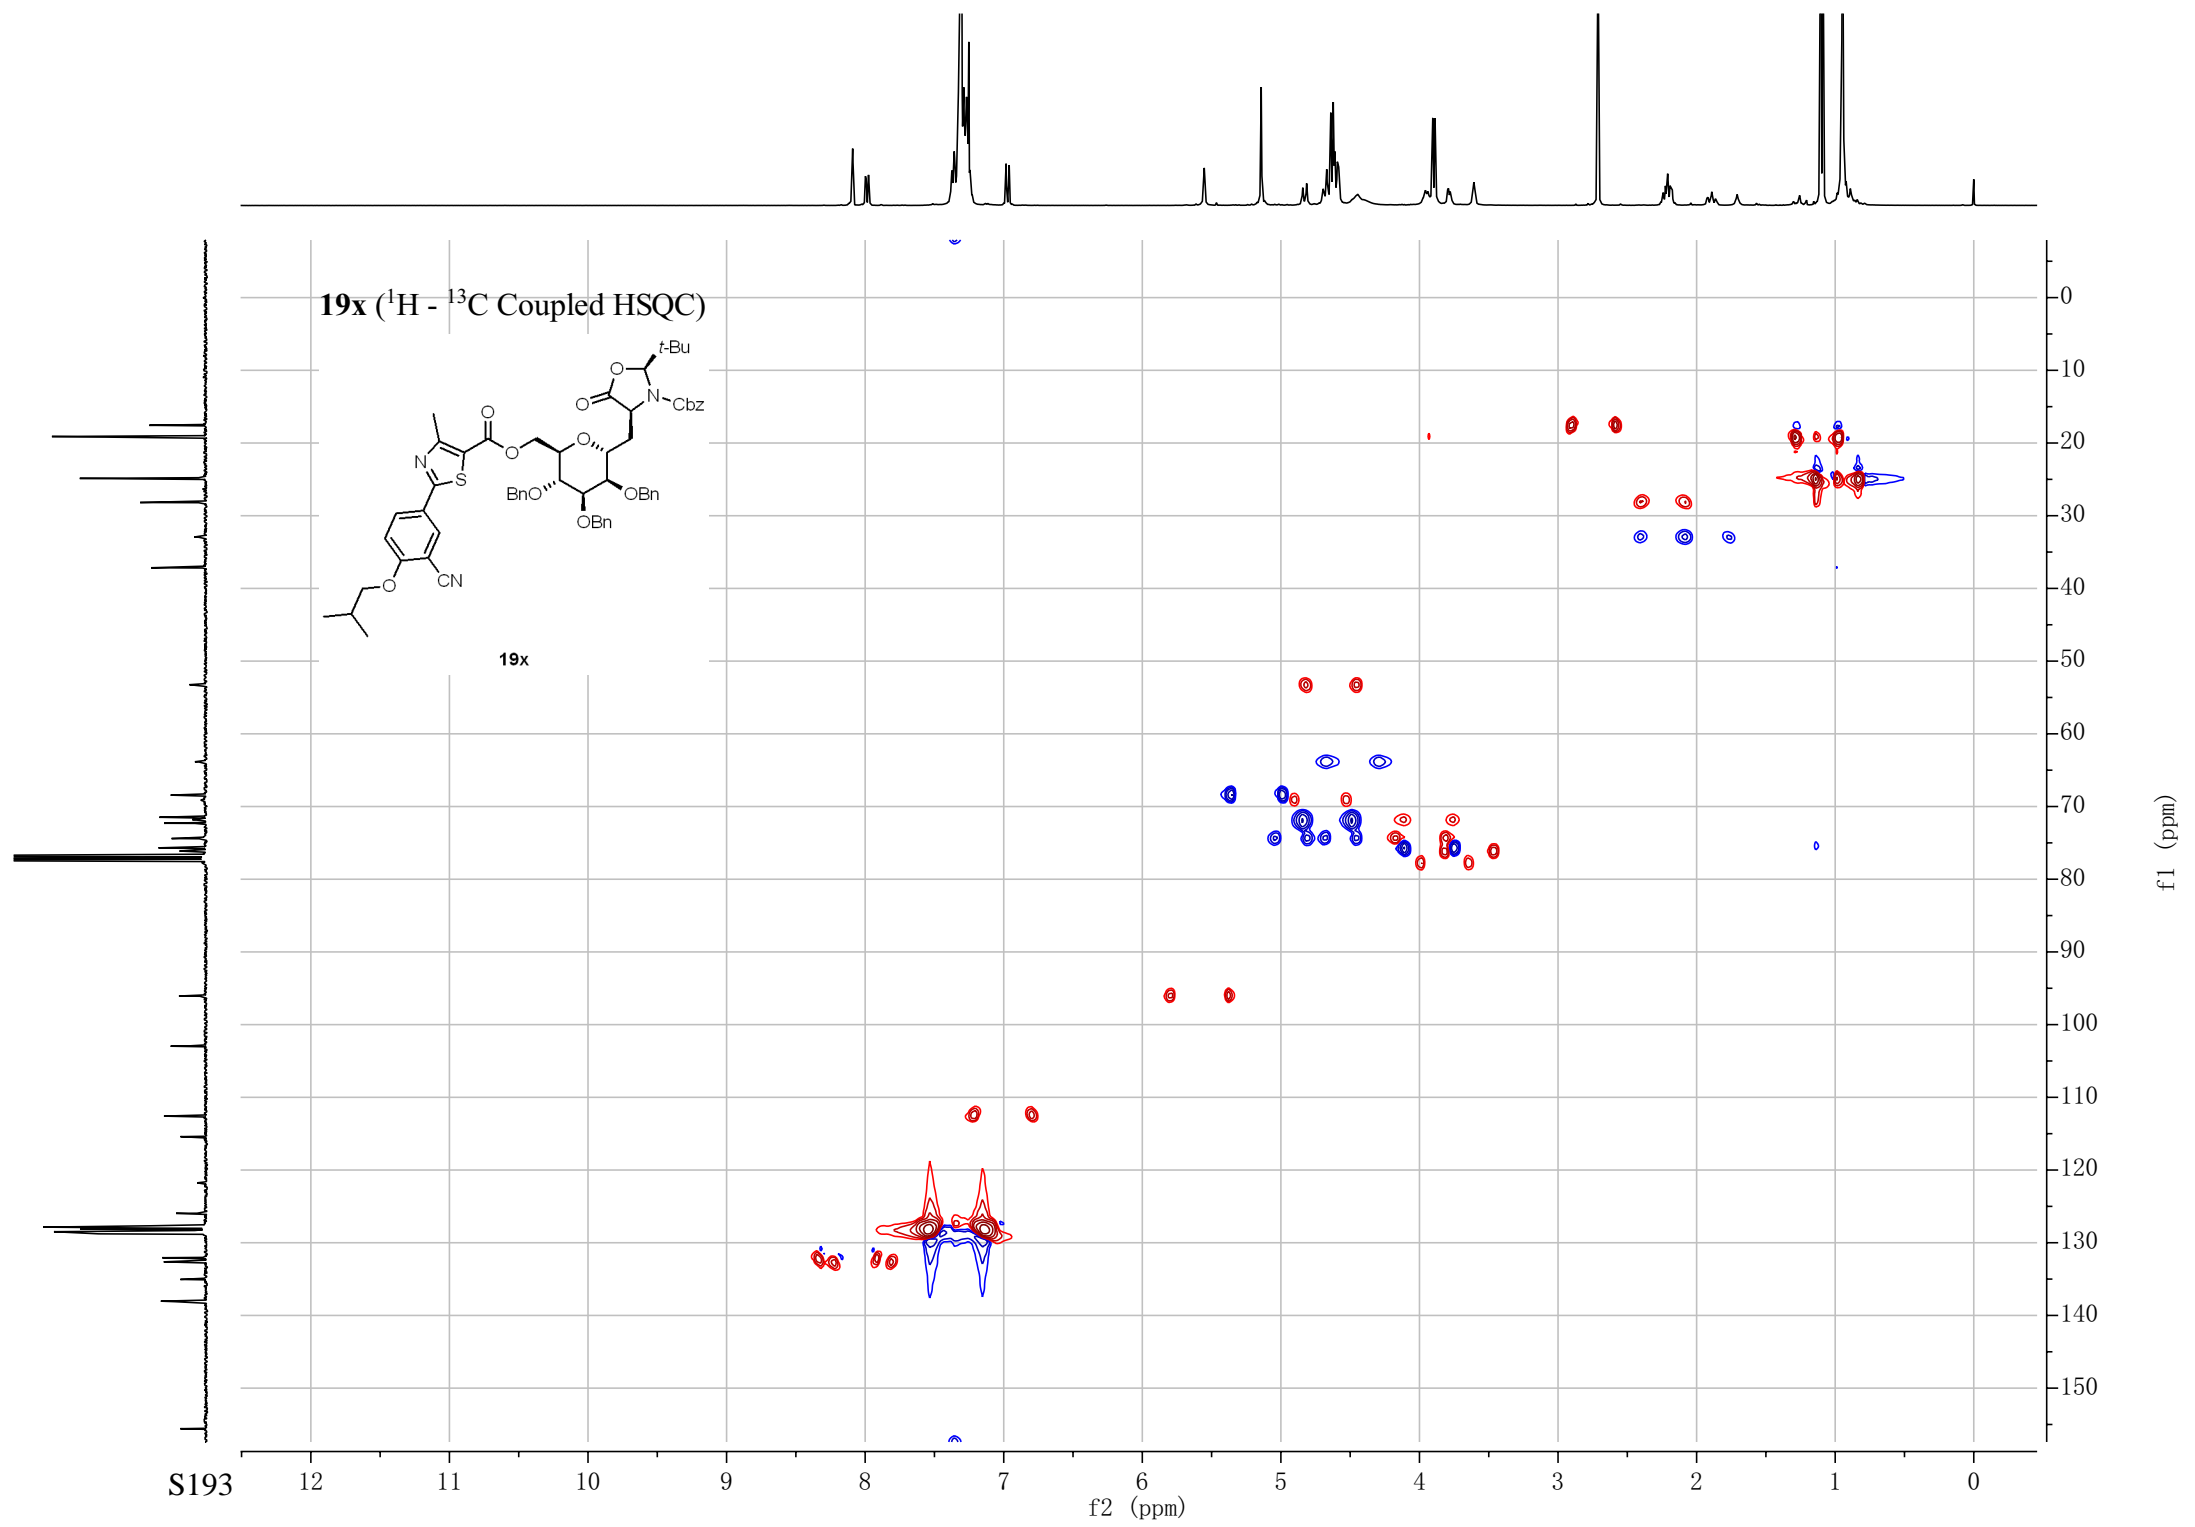

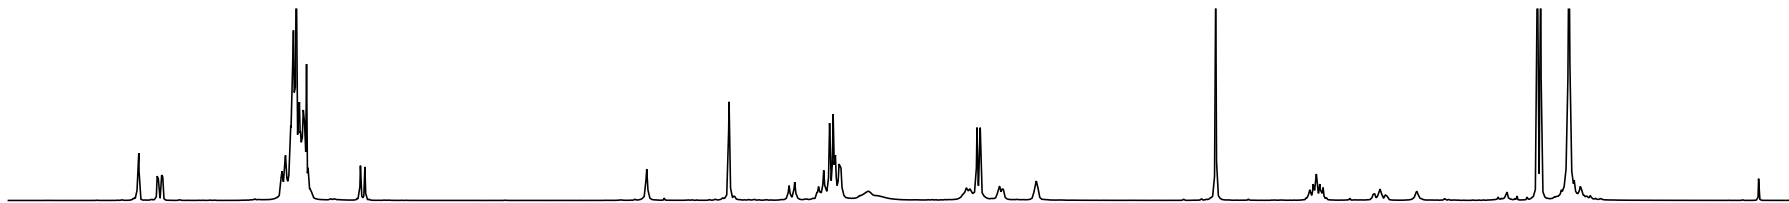

19x (<sup>1</sup>H - <sup>13</sup>C HSQC)

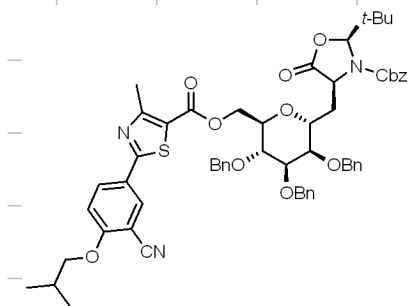

19x

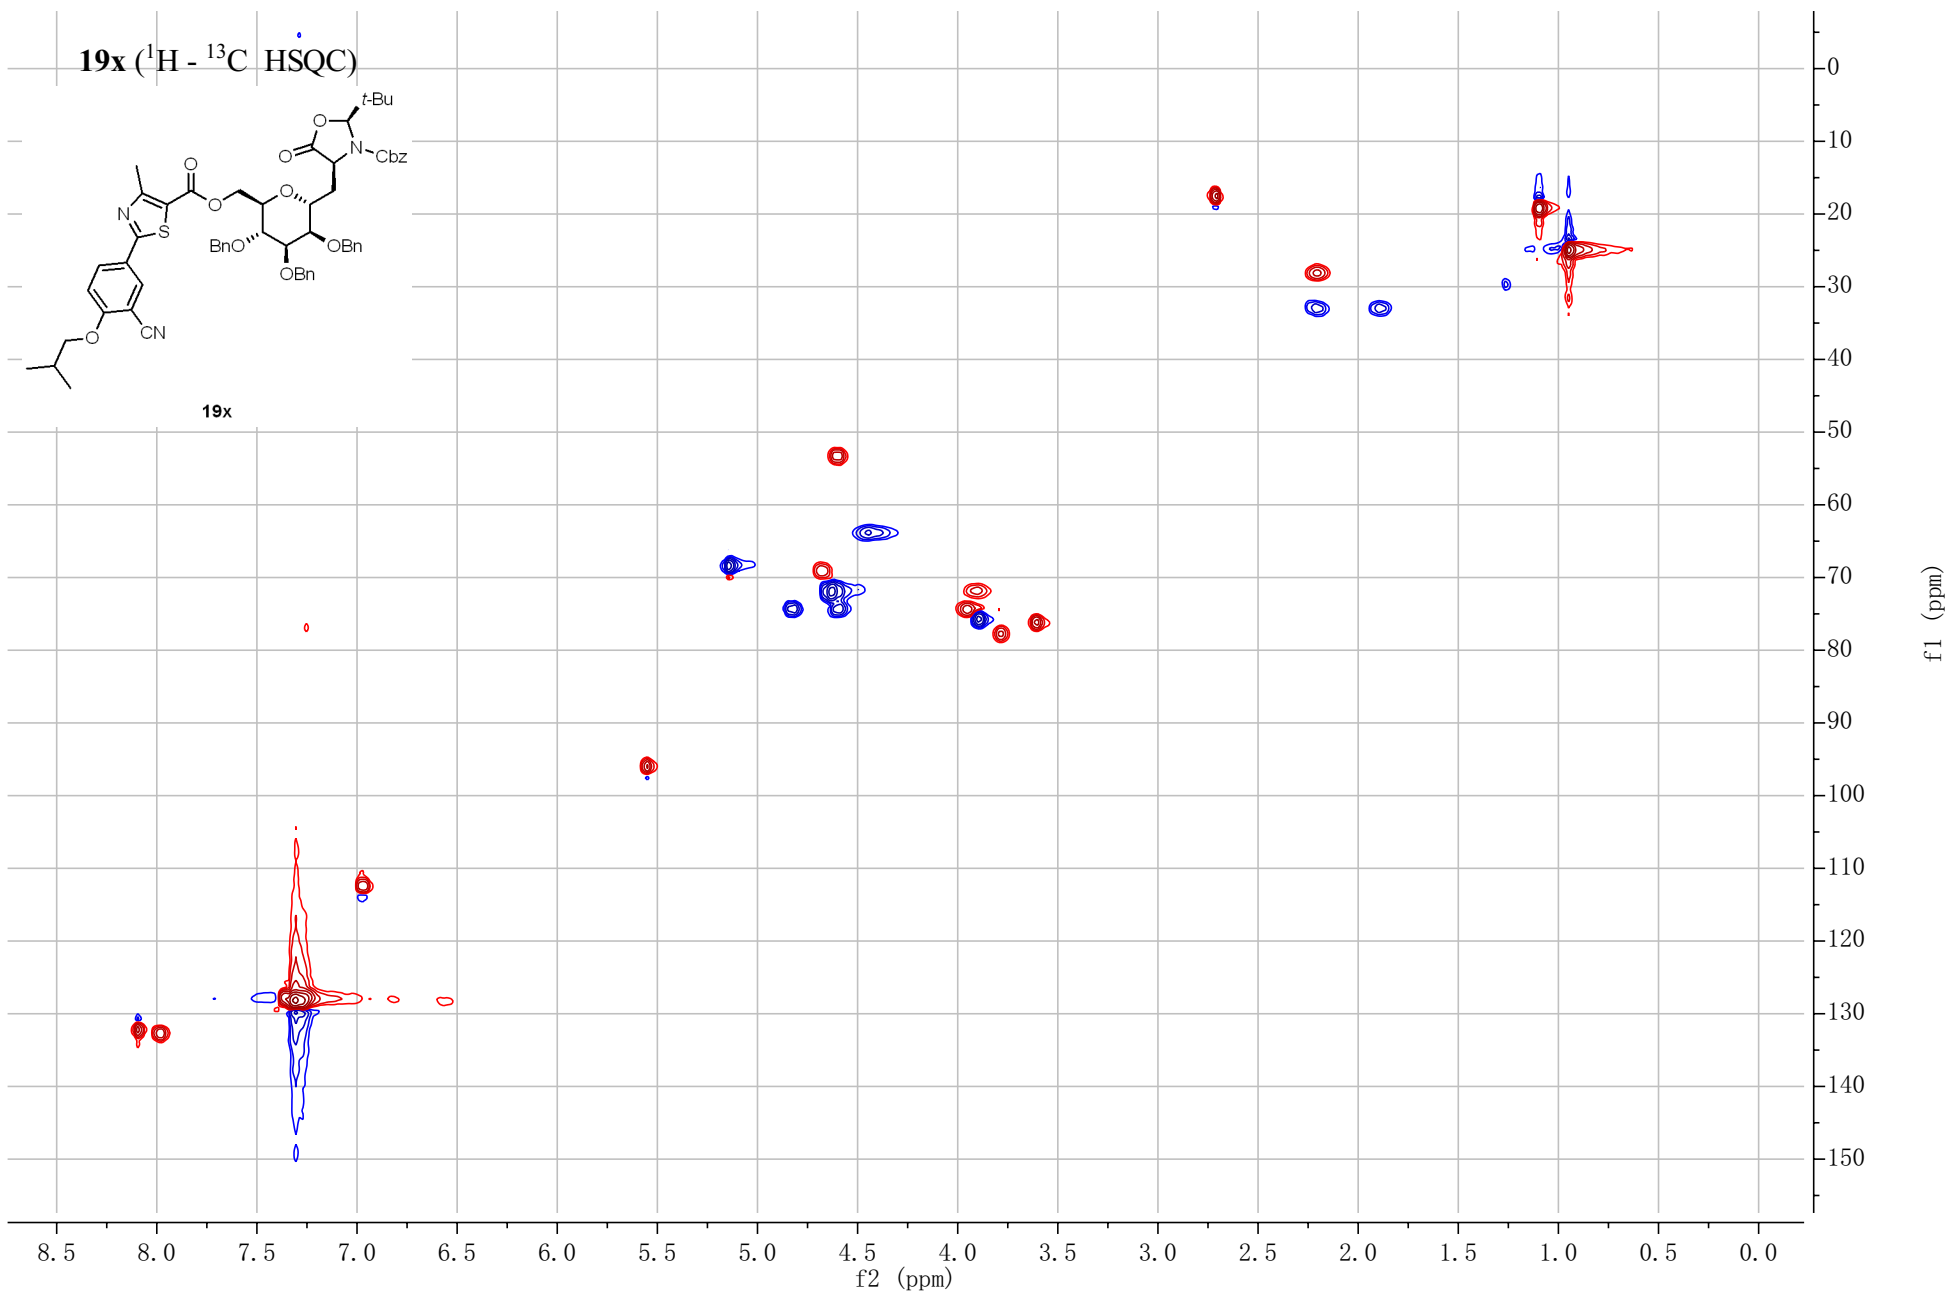

S194

f2 (ppm)

f1 (ppm)

8.12 8.12 7.89 7.89 7.88 7.87 7.57 7.57 7.55 7.55 7.49 7.47 7.47 7.40 7.38 7.37 7.37 7.36 7.35 7.35 7.34 7.34 7.33 7.33 7.32 7.32 7.31 7.30 7.30 7.29 7.28 7.28 7.27 7.26 7.26 6.99 6.97 5.51 5.16 5.15 5.15 4.72 4.69 4.66 4.63 4.61 4.60 4.58 4.57 4.54 4.49 4.46 3.78 3.75 3.75 3.63 3.57 3.57 0.93

**19y** (<sup>1</sup>H NMR, 400MHz, CDCl<sub>3</sub>)

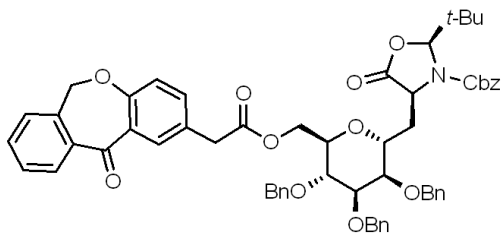

**19y**

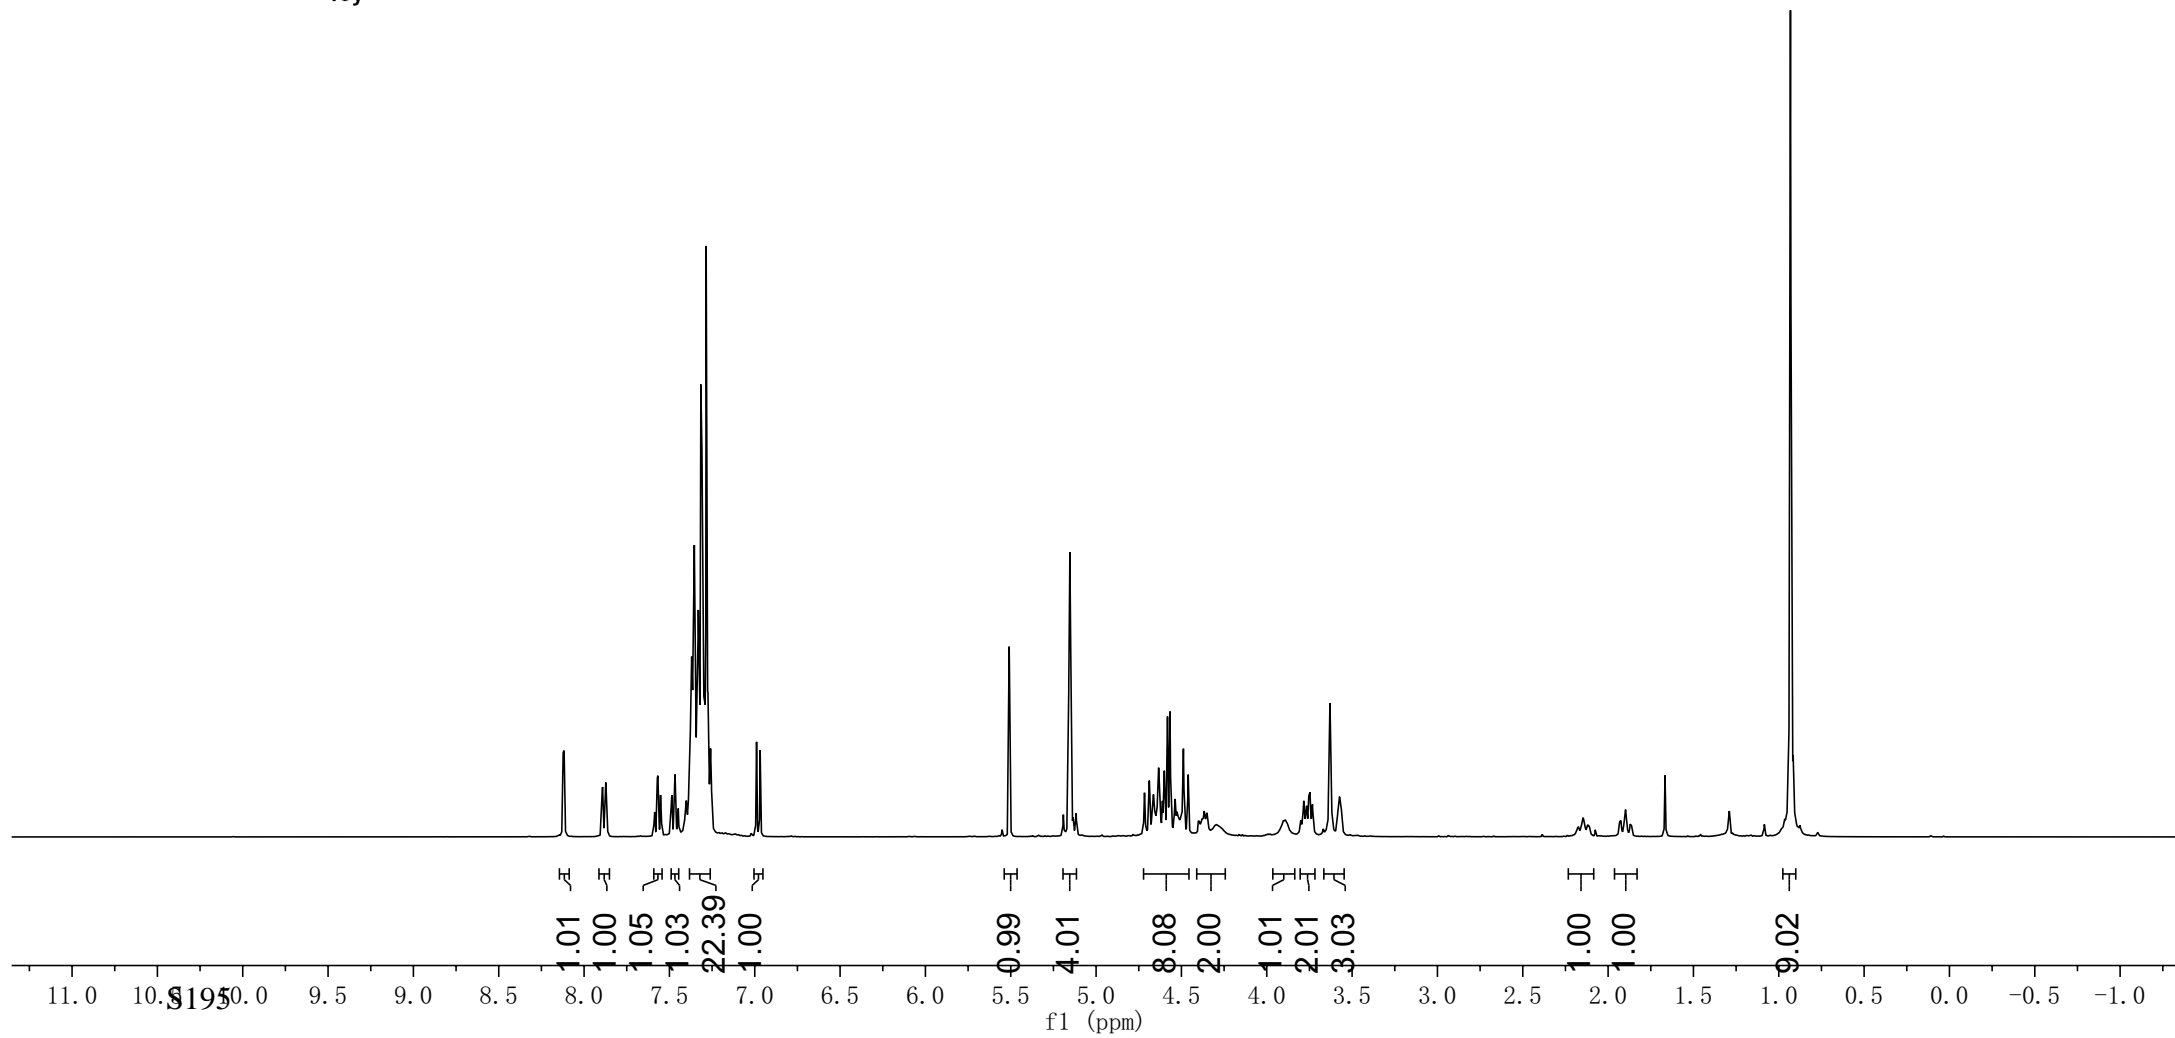

190.75

172.18  
171.22

160.52

155.61

140.51

138.20

138.16

136.57

135.75

135.38

132.81

132.67

129.75

129.30

128.81

128.65

128.53

128.51

128.45

128.06

128.05

127.93

127.91

127.84

127.78

125.18

121.08

96.08

77.48

77.16

76.84

75.99

75.00

74.10

73.72

72.28

72.12

71.41

68.26

63.85

53.19

40.41

37.12

24.98

**19y** ( $^{13}\text{C}$  NMR, 101MHz,  $\text{CDCl}_3$ )

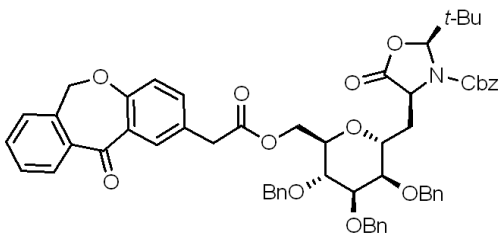

**19y**

210 190 180 170 160 150 140 130 120 110 100 90 80 70 60 50 40 30 20 10 0 -10

3996

f1 (ppm)

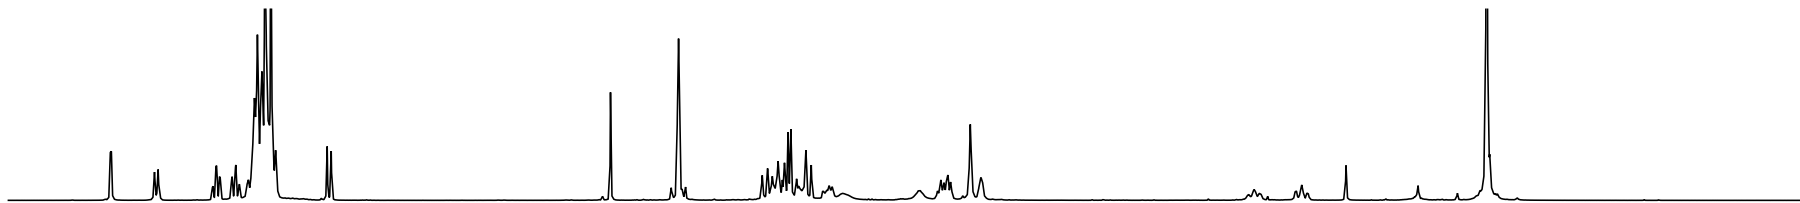

**19y** ( $^1\text{H} - ^1\text{H}$  COSY)

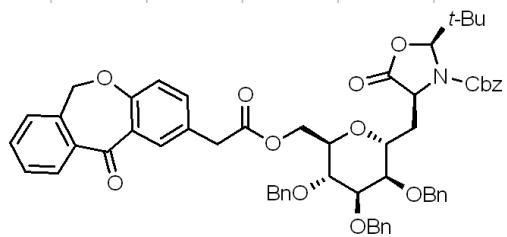

**19y**

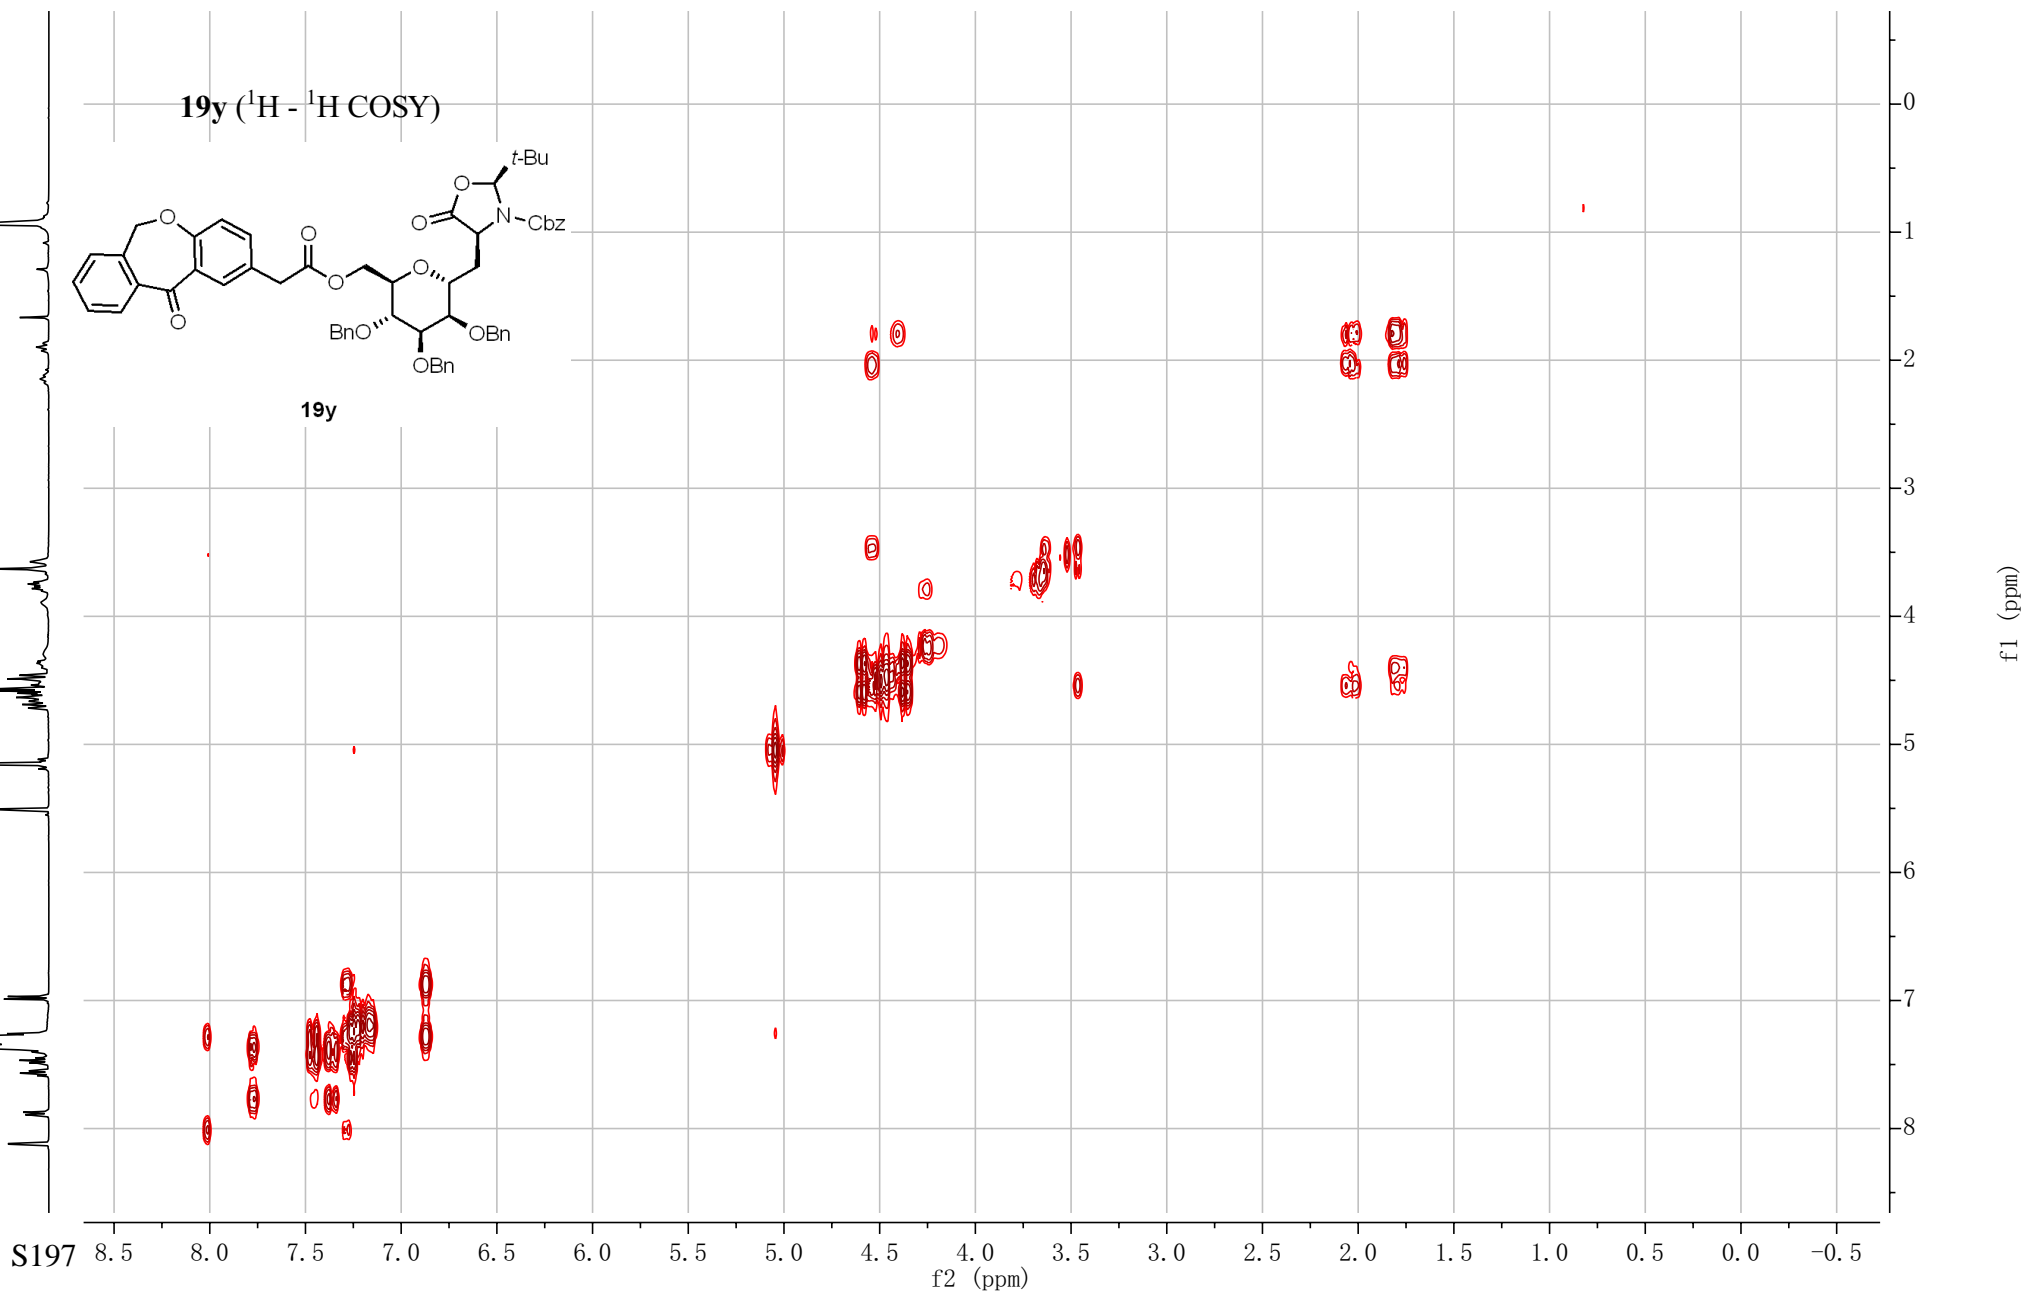



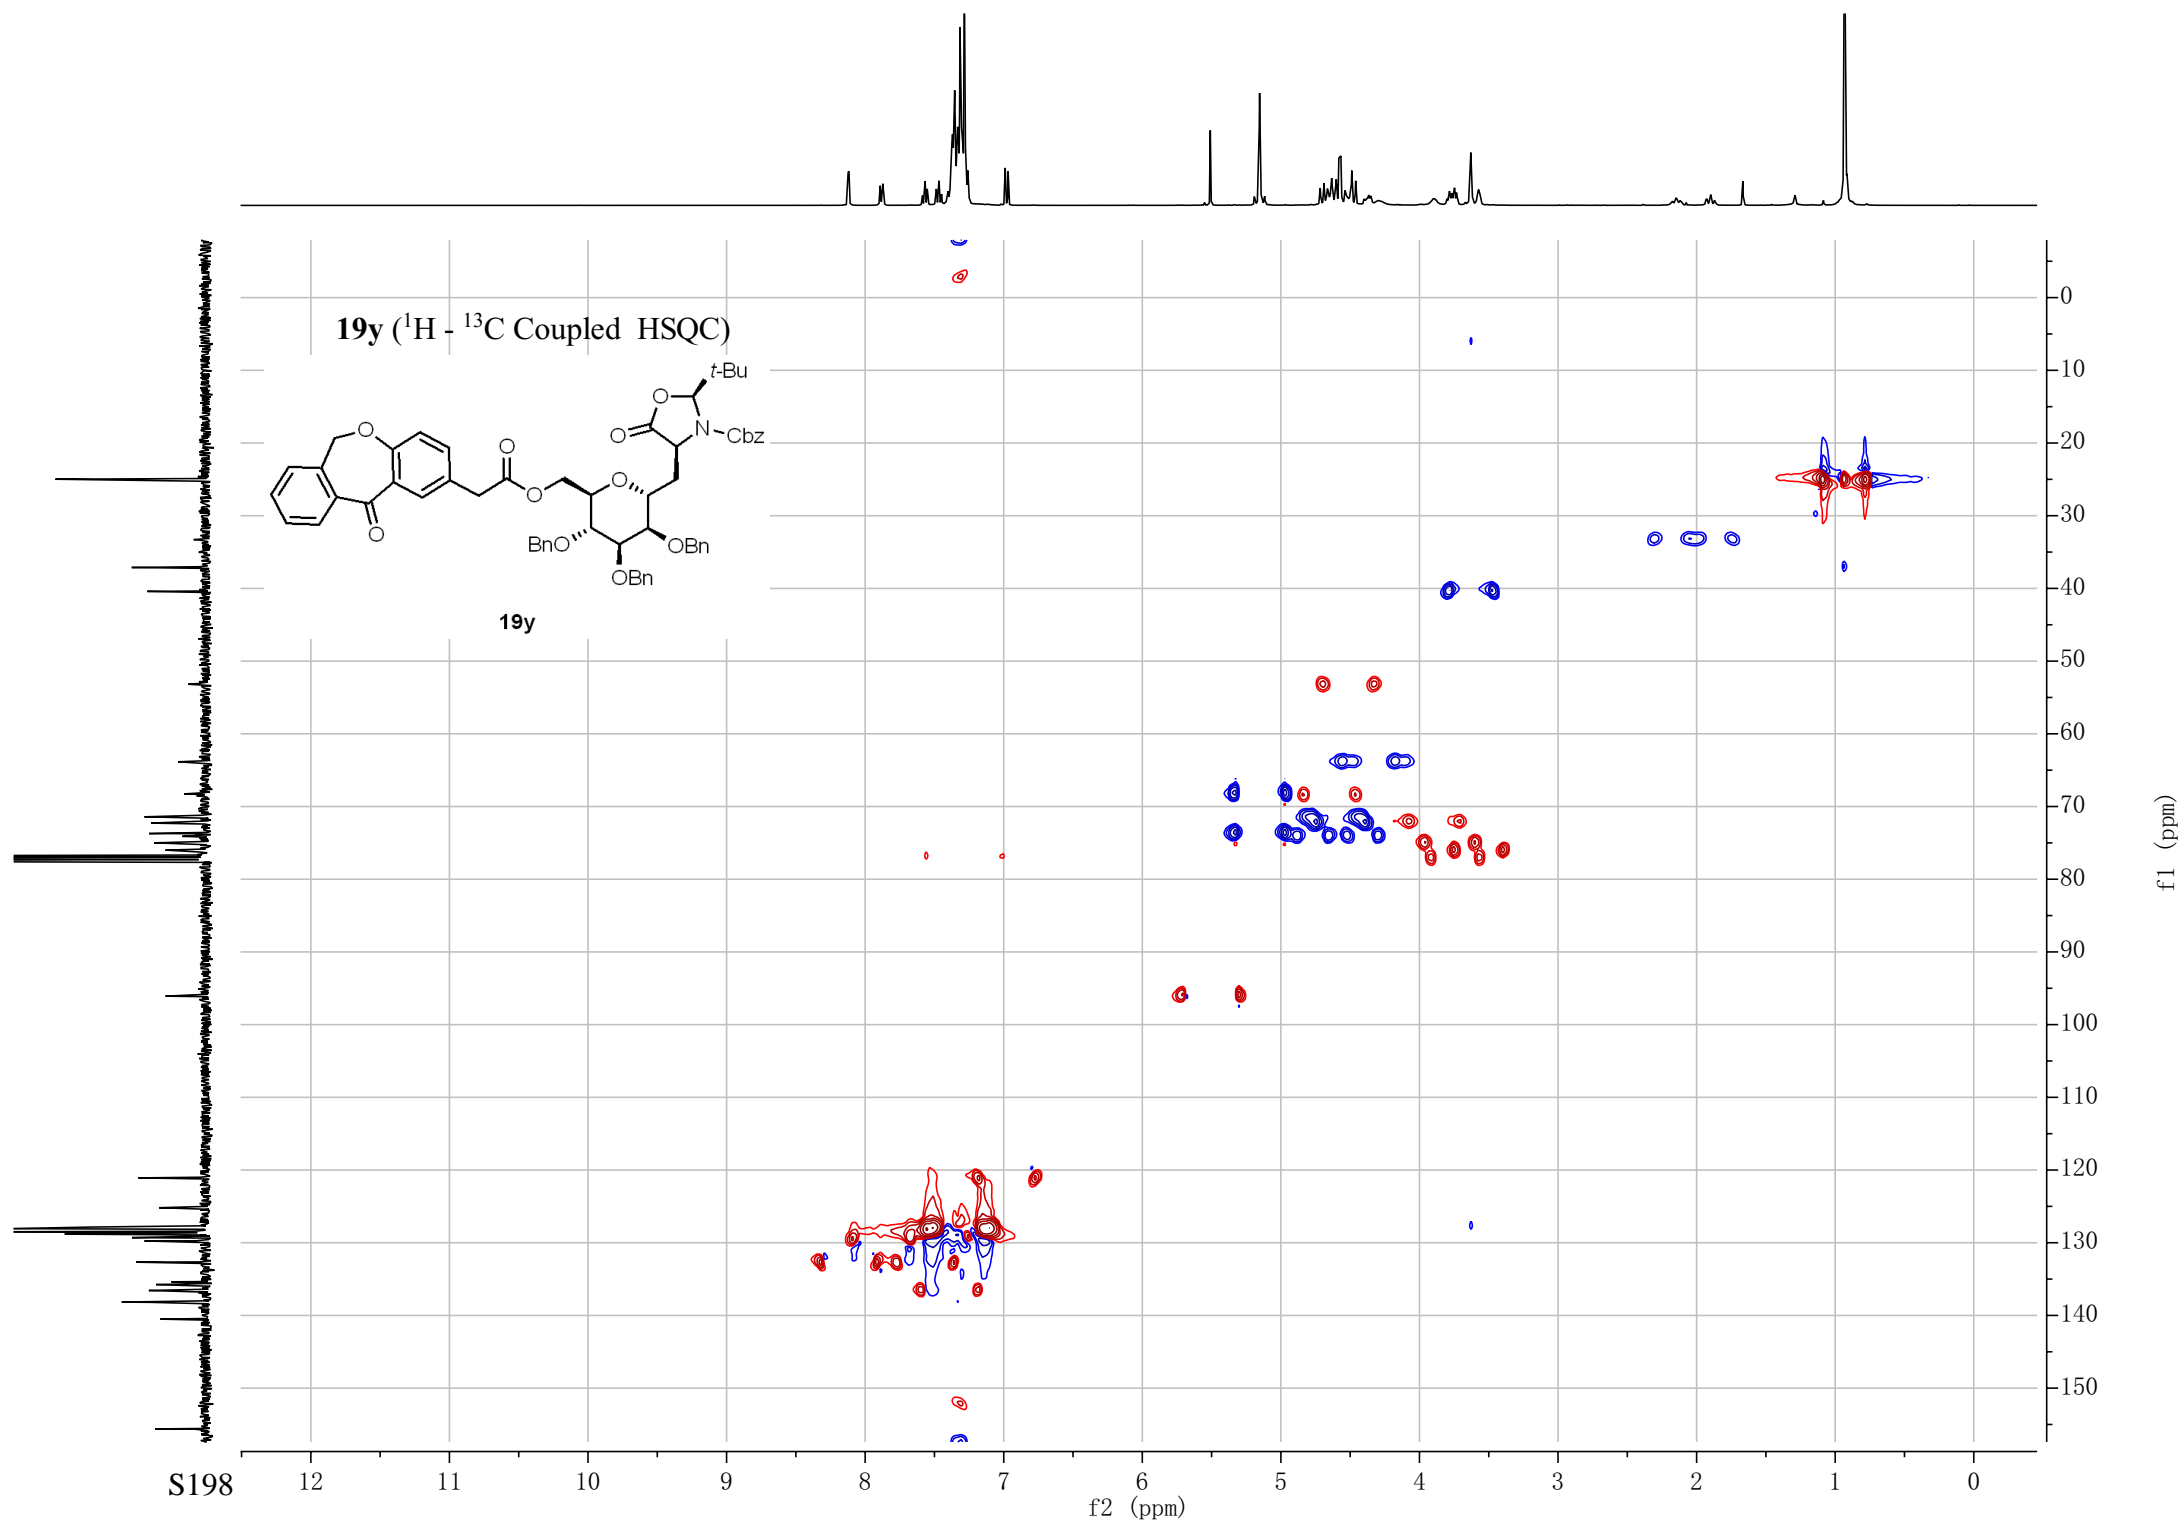

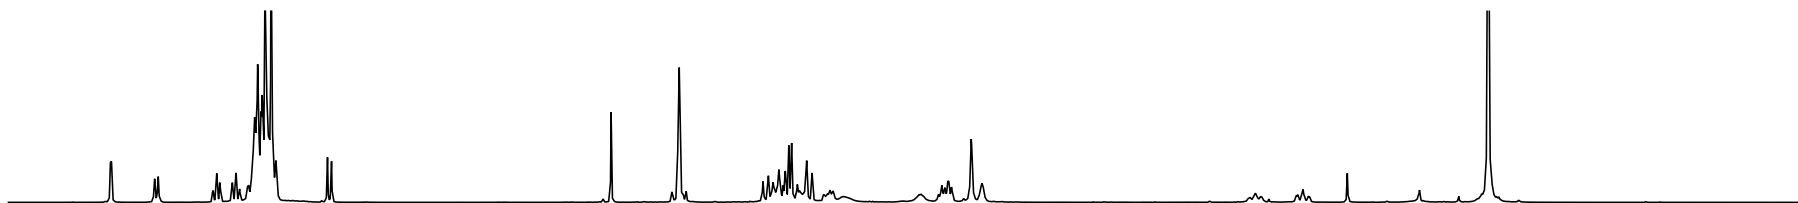

**19y** ( $^1\text{H} - ^{13}\text{C}$  HSQC)

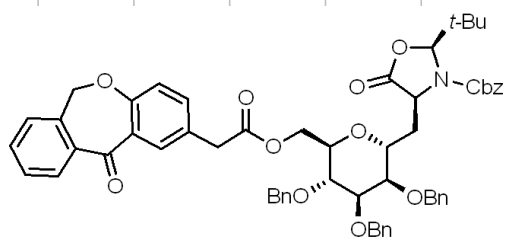

**19y**

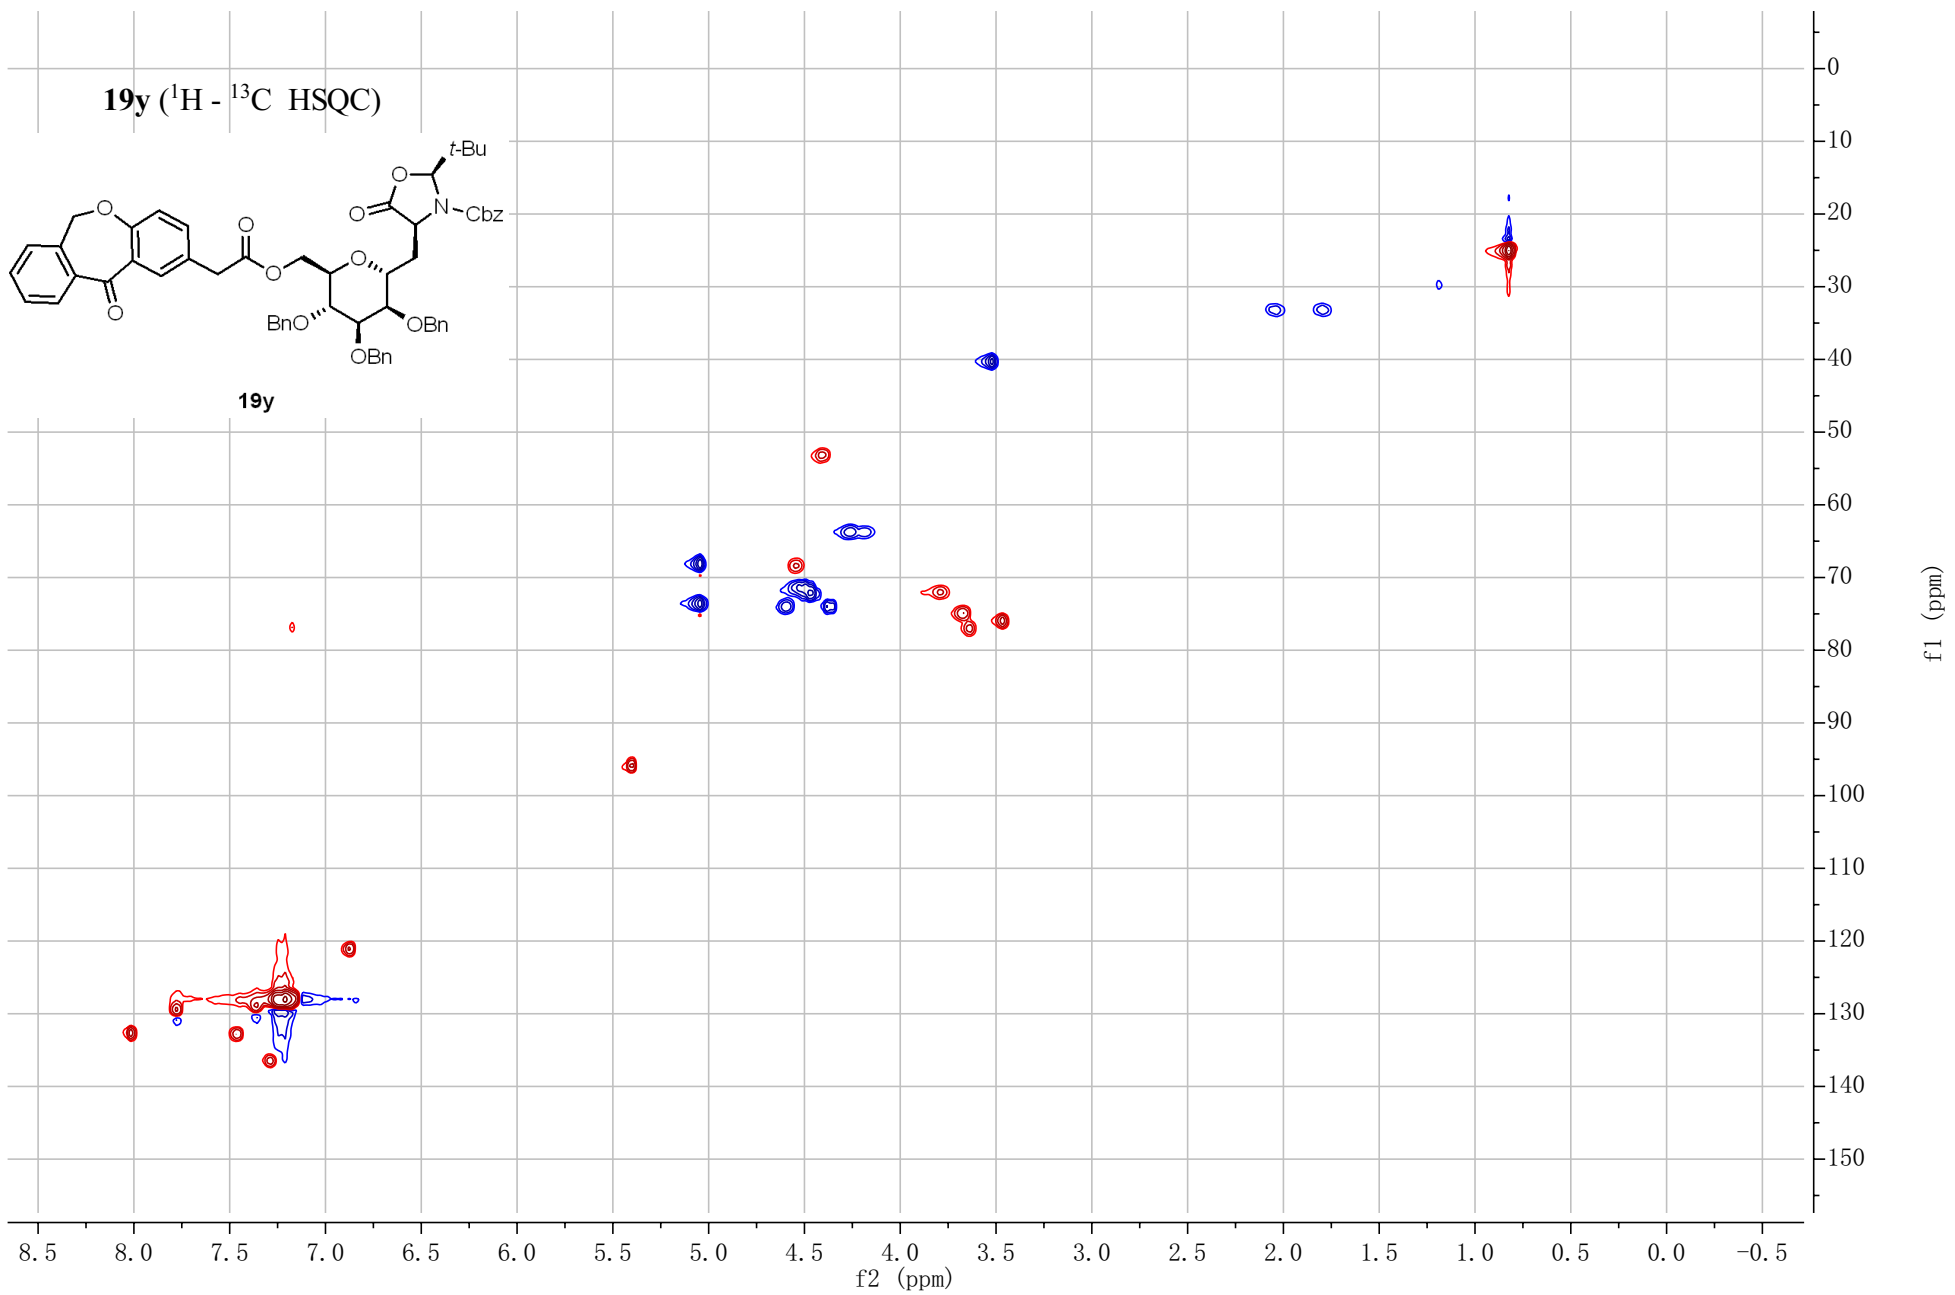

S199

f2 (ppm)

f1 (ppm)

7.63  
7.62  
7.62  
7.61  
7.61  
7.60  
7.57  
7.56  
7.55  
7.55  
7.54  
7.37  
7.36  
7.36  
7.35  
7.34  
7.34  
7.33  
7.33  
7.33  
7.31  
7.30  
7.29  
7.29  
7.28  
7.27  
7.27  
7.26  
7.25  
7.25  
7.24  
7.24  
5.53  
5.15  
5.14  
4.72  
4.65  
4.63  
4.62  
4.62  
4.59  
4.59  
4.57  
4.56  
4.55  
4.54  
4.51  
3.86  
3.85  
3.58  
3.16  
3.15  
3.14  
3.13  
2.90  
2.89  
2.88  
2.87  
0.93

19z (<sup>1</sup>H NMR, 400MHz, CDCl<sub>3</sub>)

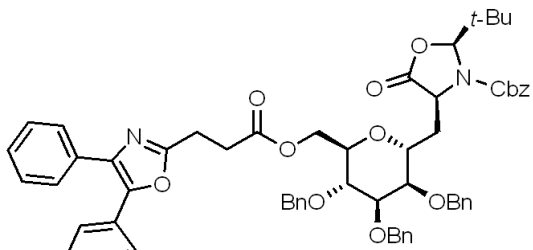

19z

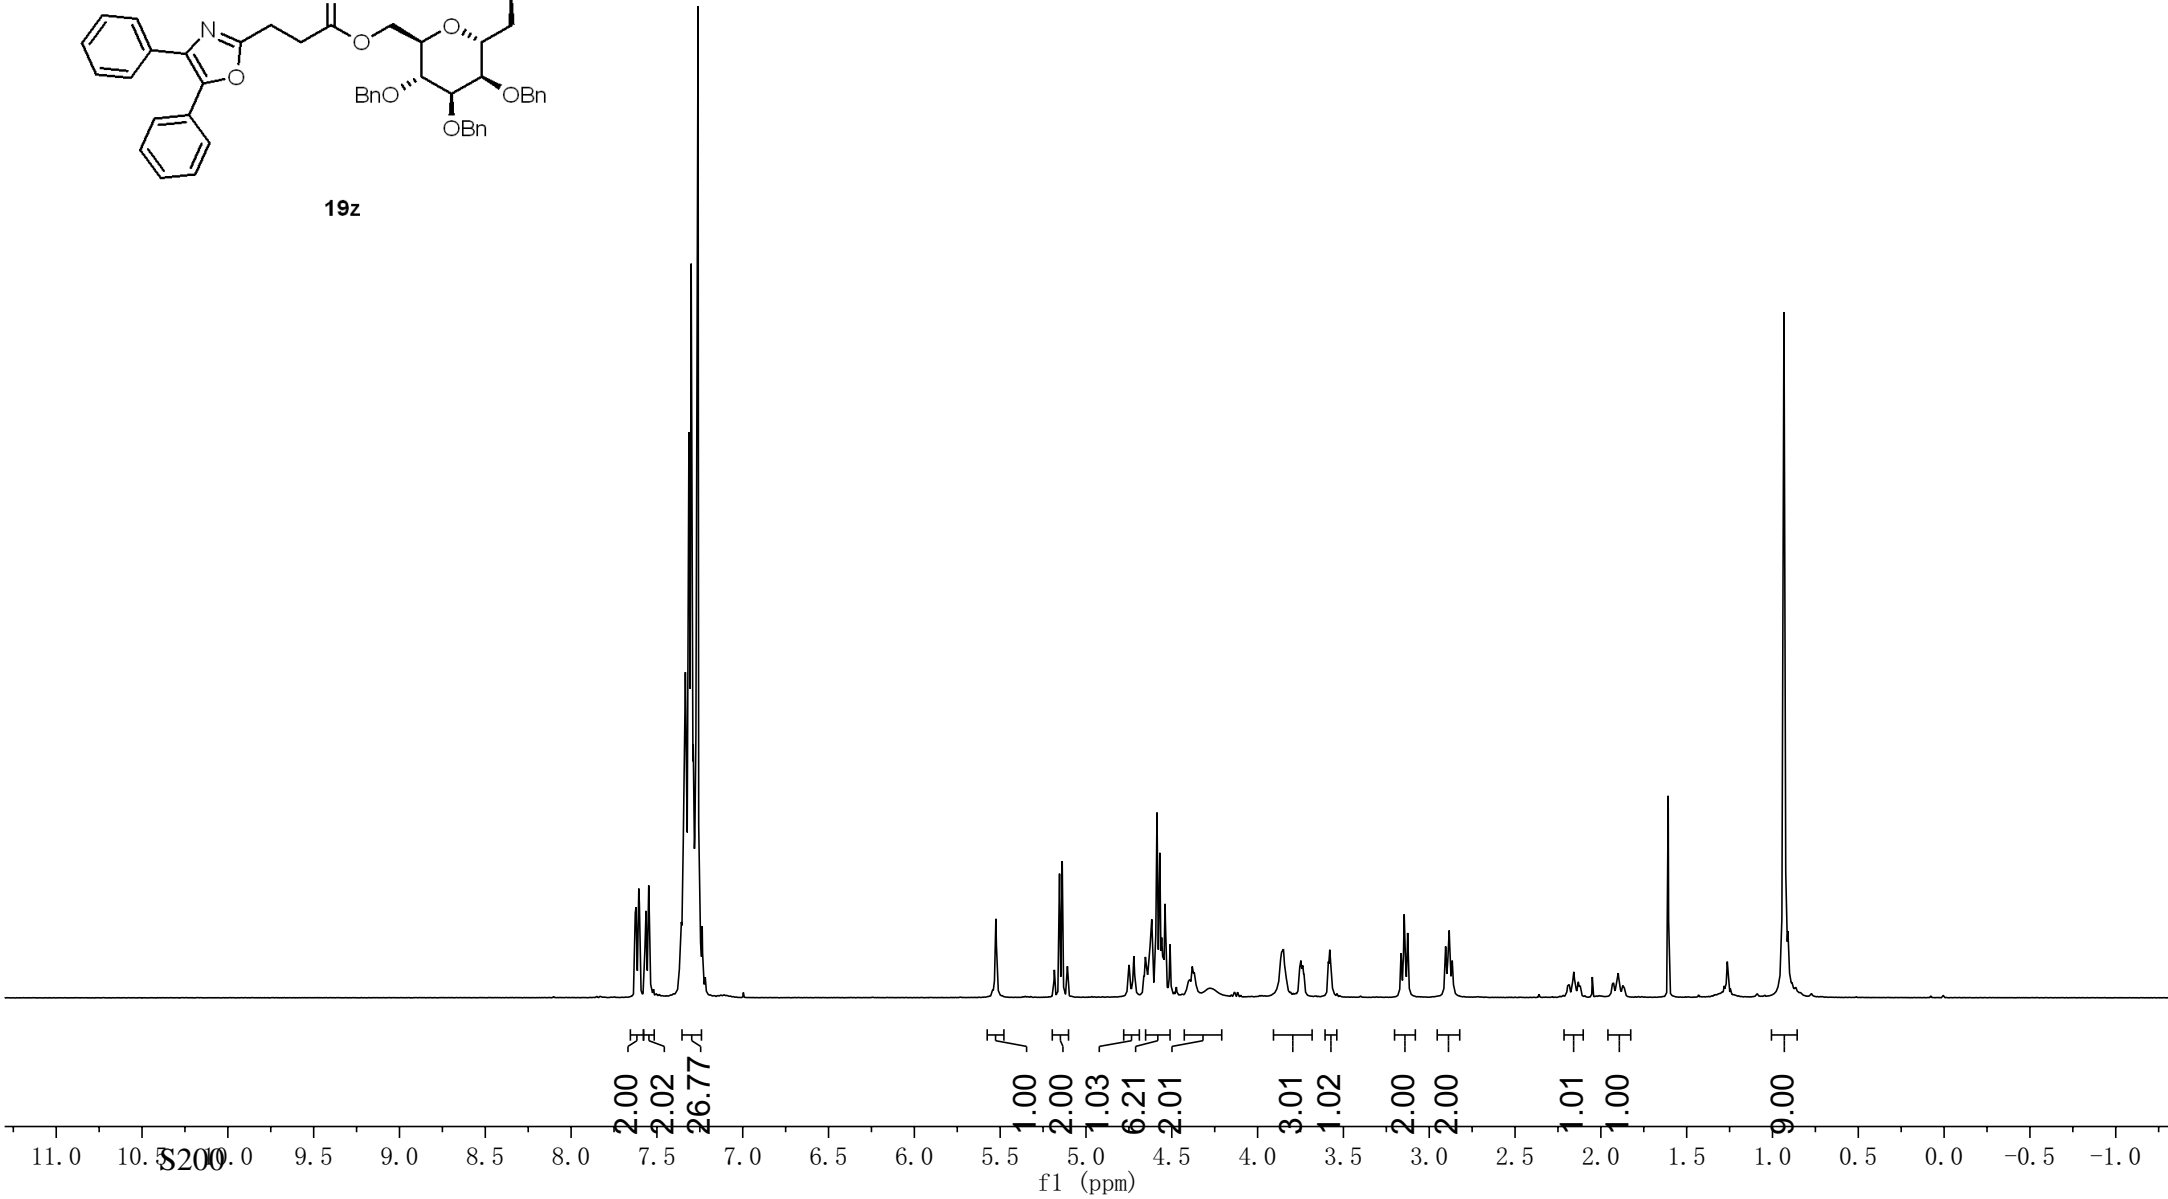

172.25  
171.94  
161.87  
155.66  
145.51  
138.22  
138.19  
135.24  
132.59  
129.11  
128.86  
128.76  
128.73  
128.65  
128.54  
128.46  
128.20  
128.13  
128.02  
127.98  
127.94  
127.88  
127.76  
126.01  
96.18  
77.48  
77.16  
76.85  
75.98  
74.76  
72.29  
71.40  
68.45  
63.55  
53.43  
37.20  
31.16  
25.00  
23.57

**19z** (<sup>13</sup>C NMR, 101MHz, CDCl<sub>3</sub>)

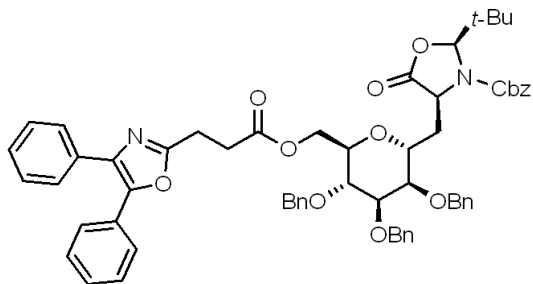

**19z**

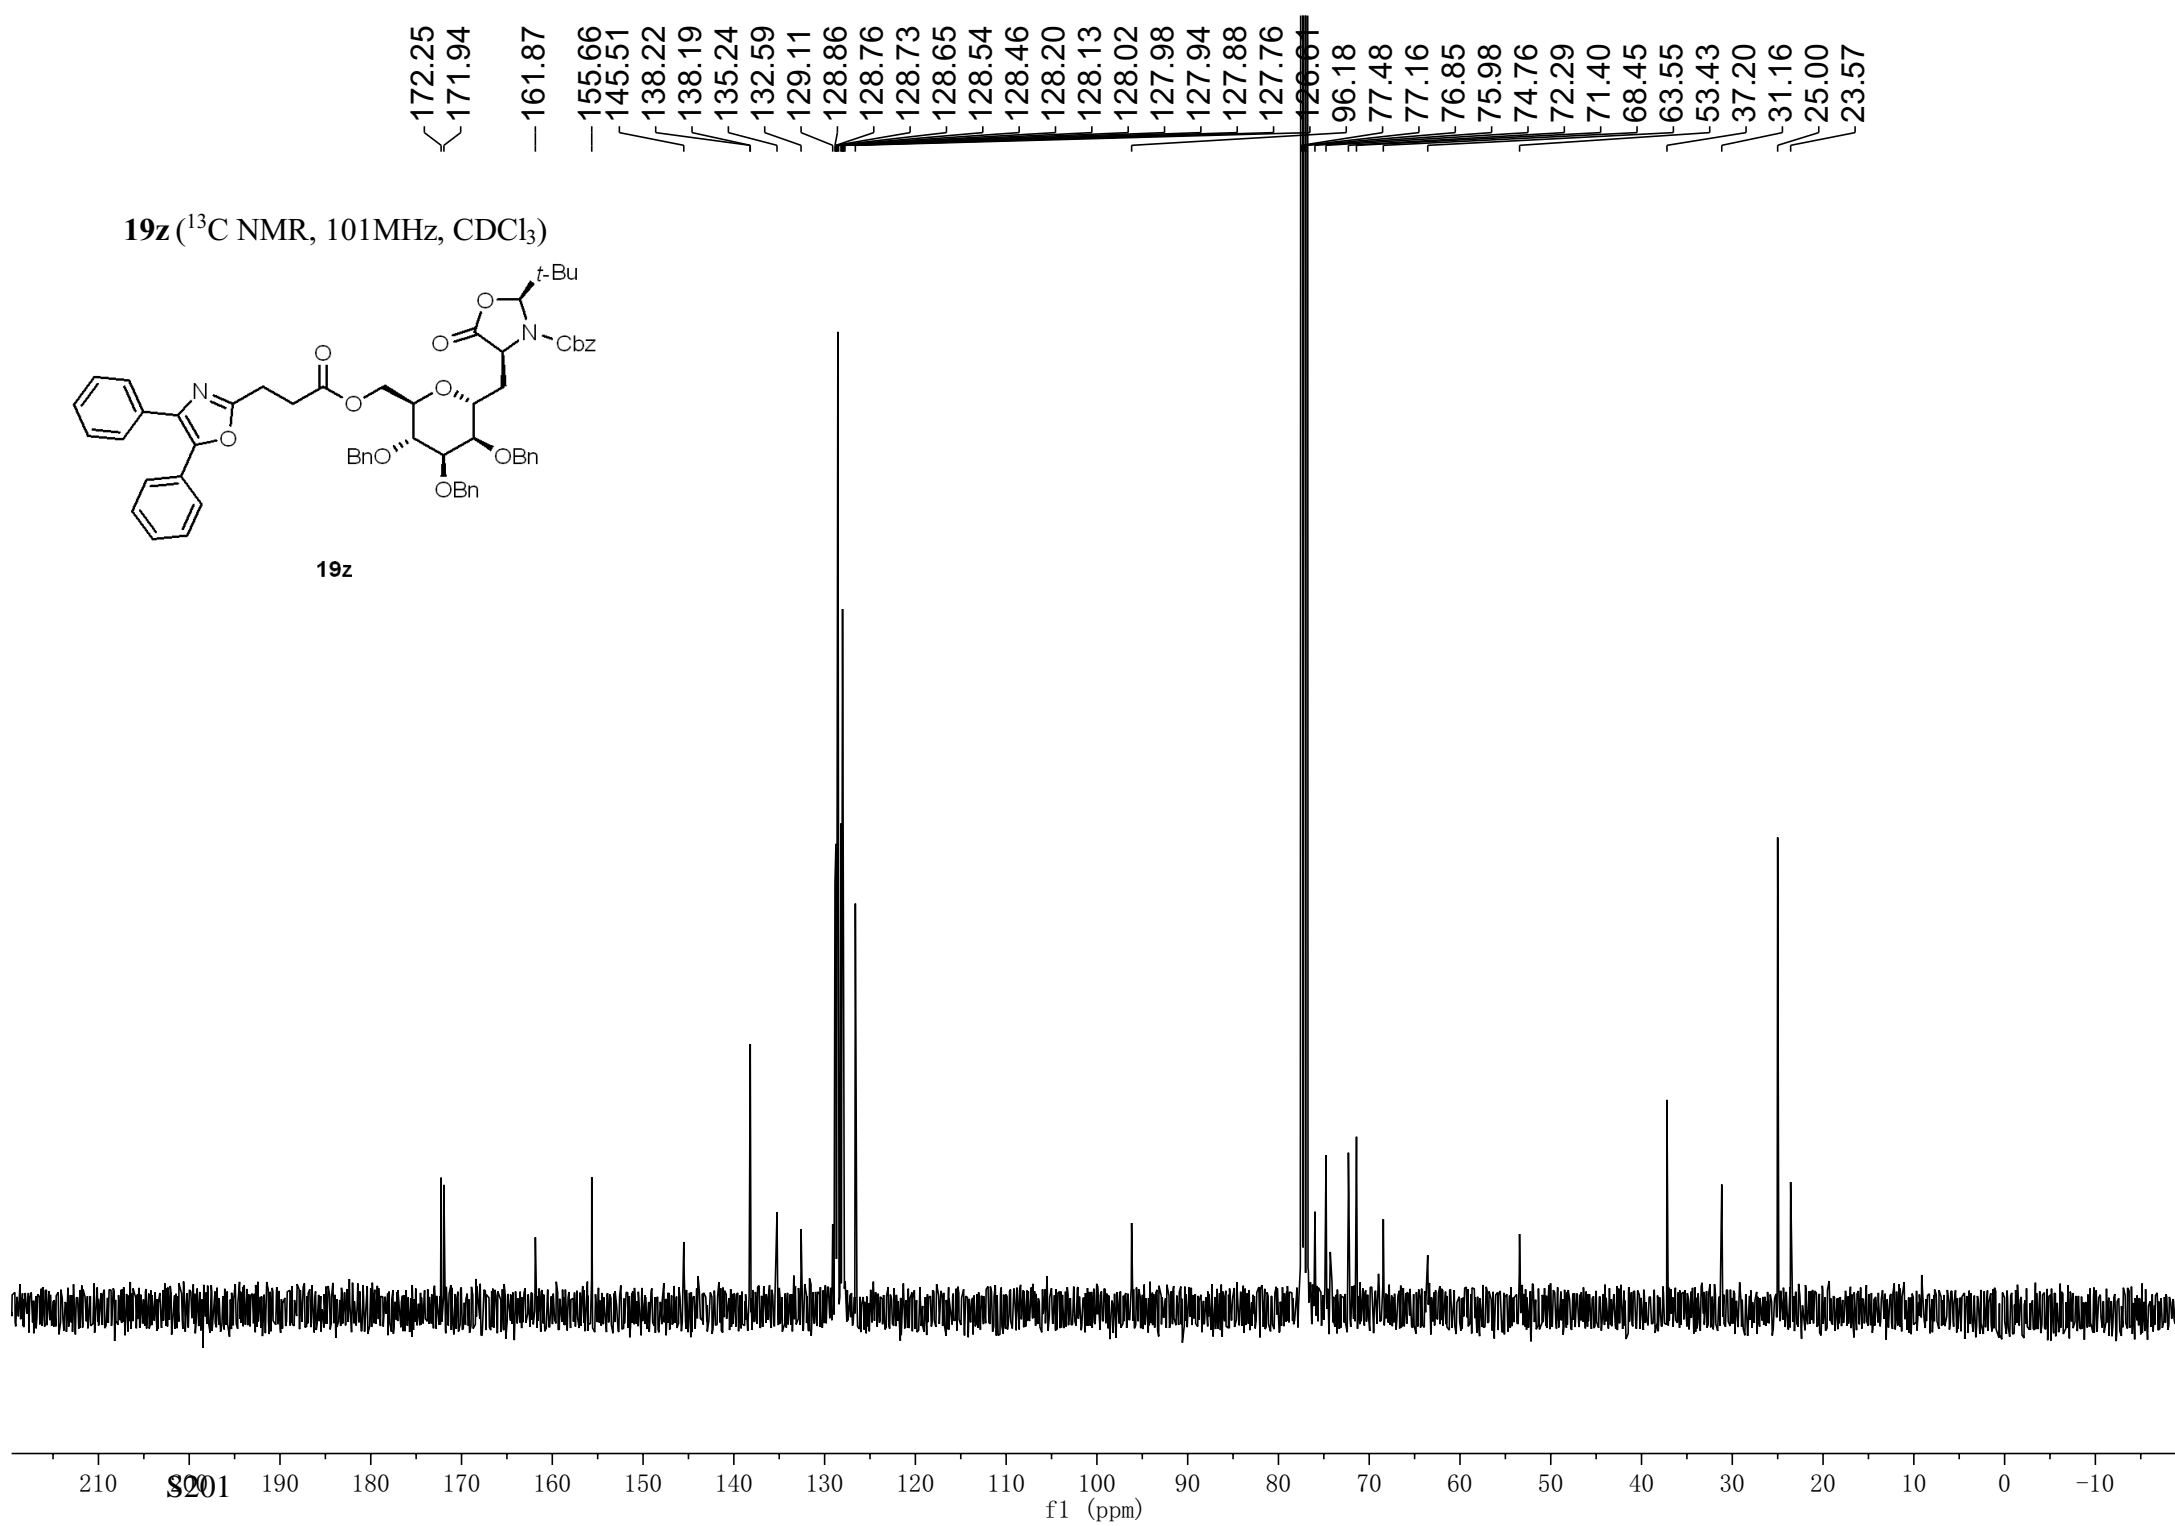

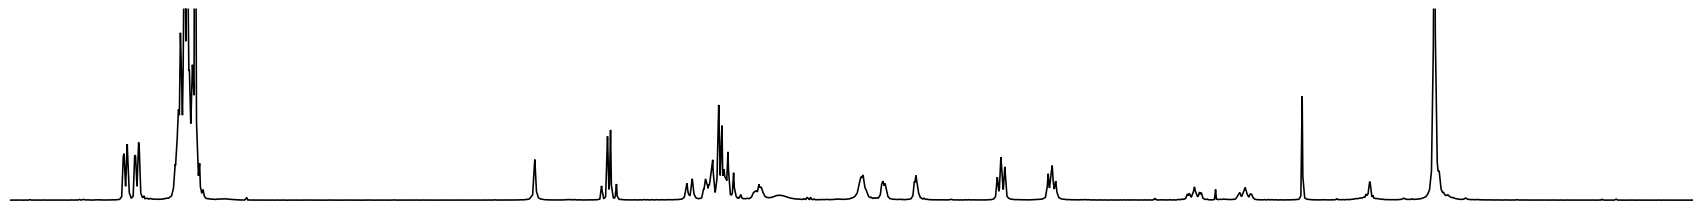

**19z** ( $^1\text{H} - ^1\text{H}$  COSY)

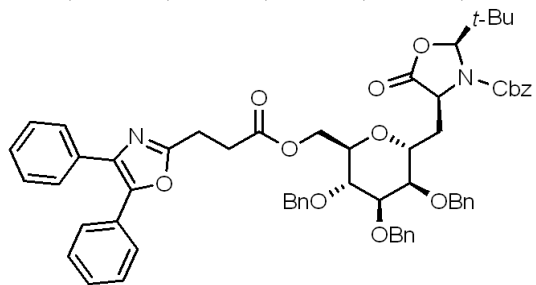

**19z**

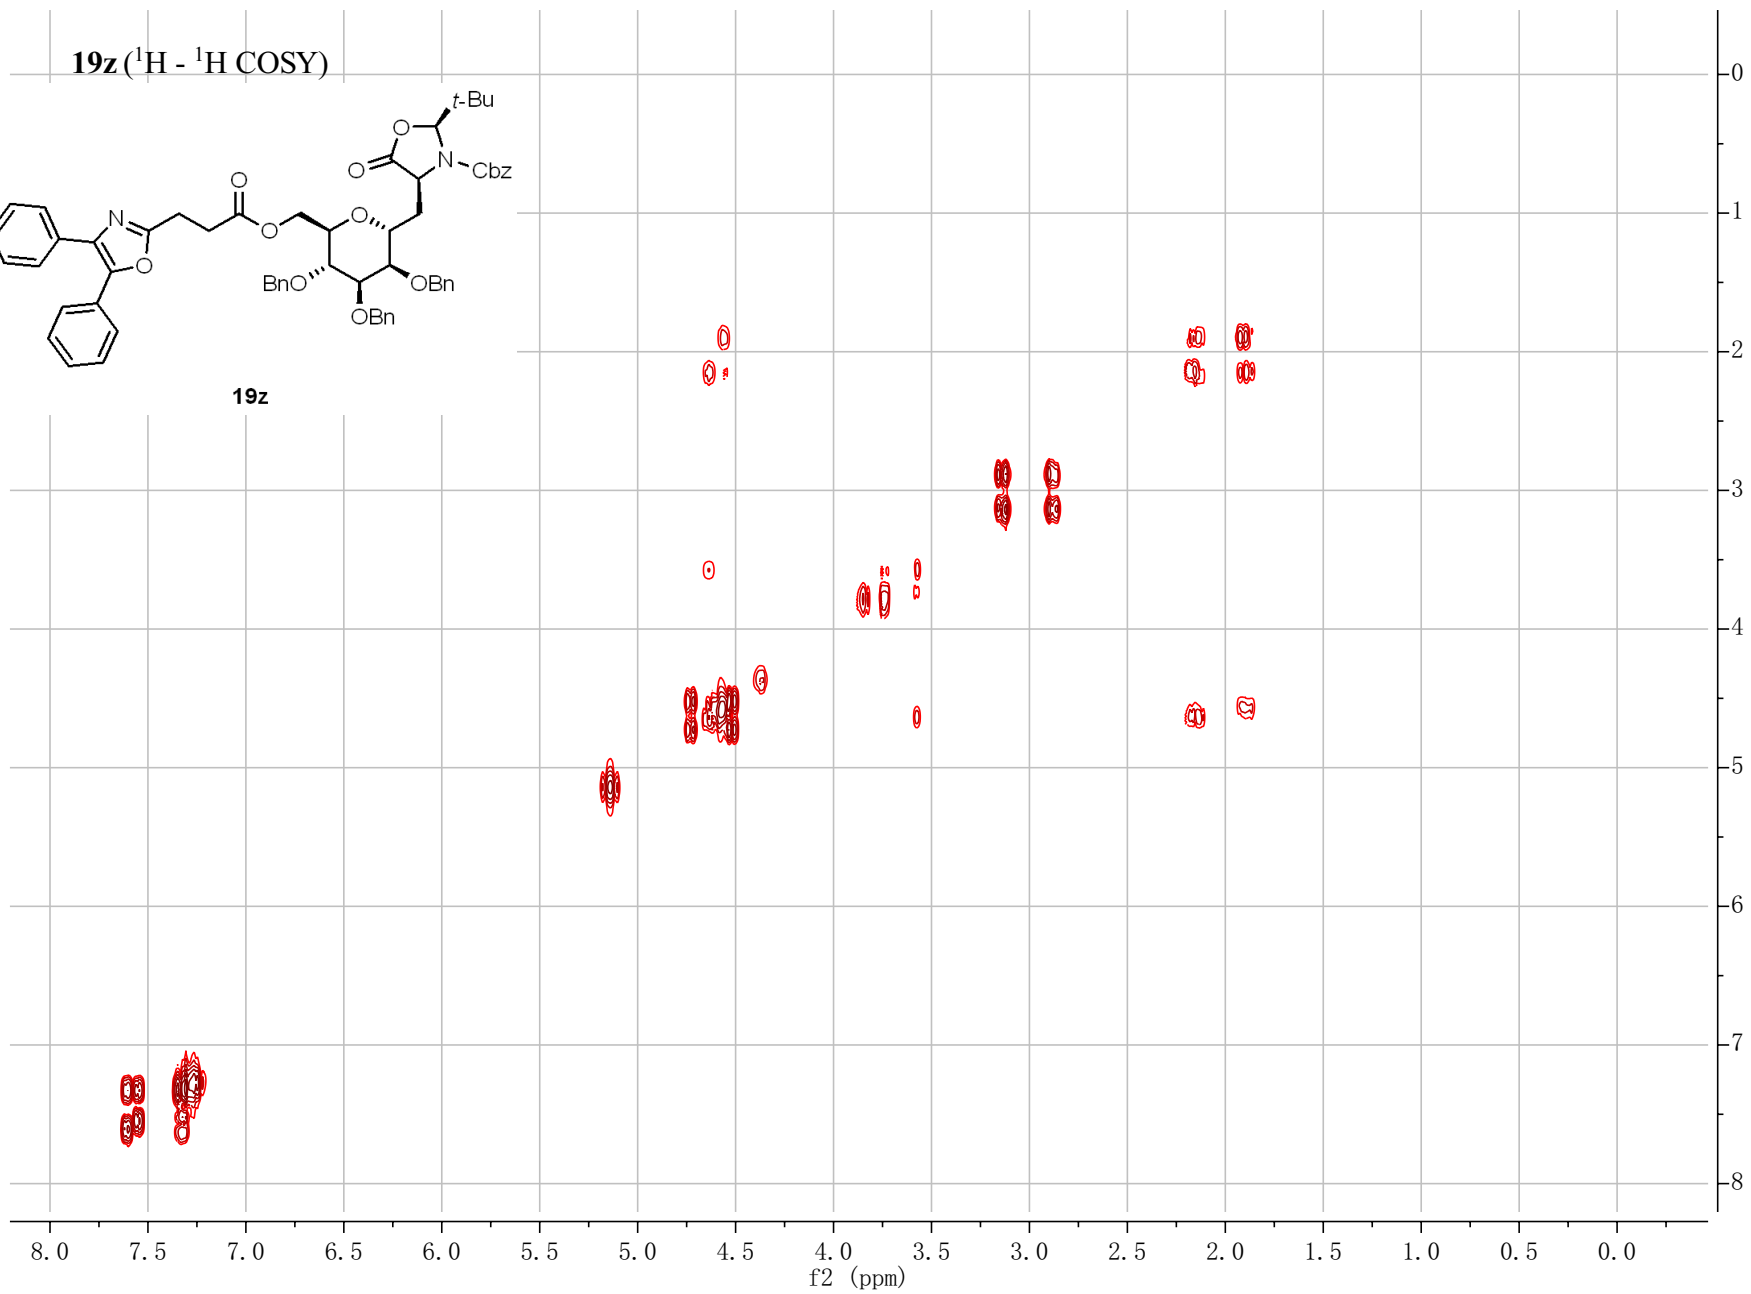

S202

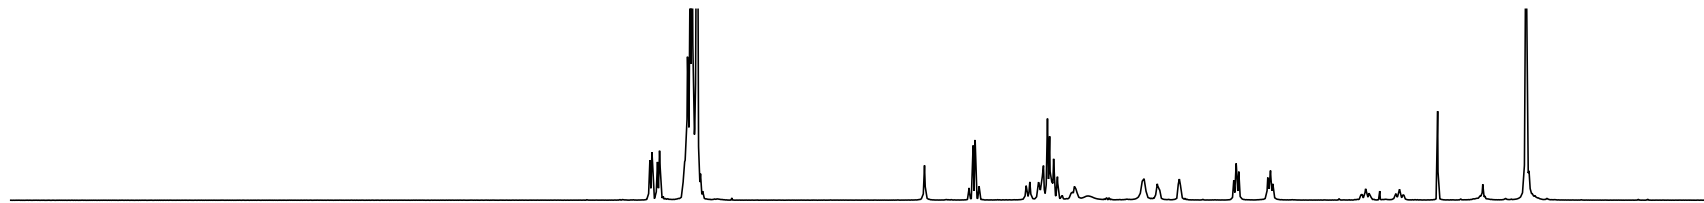

**19z** (<sup>1</sup>H - <sup>13</sup>C Coupled HSQC)

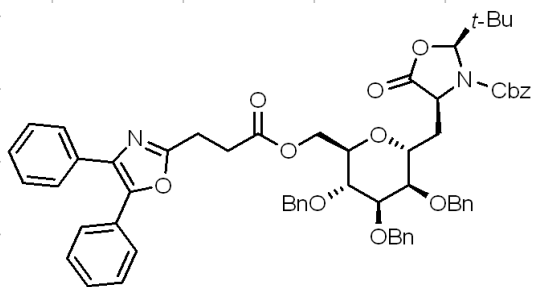

**19z**

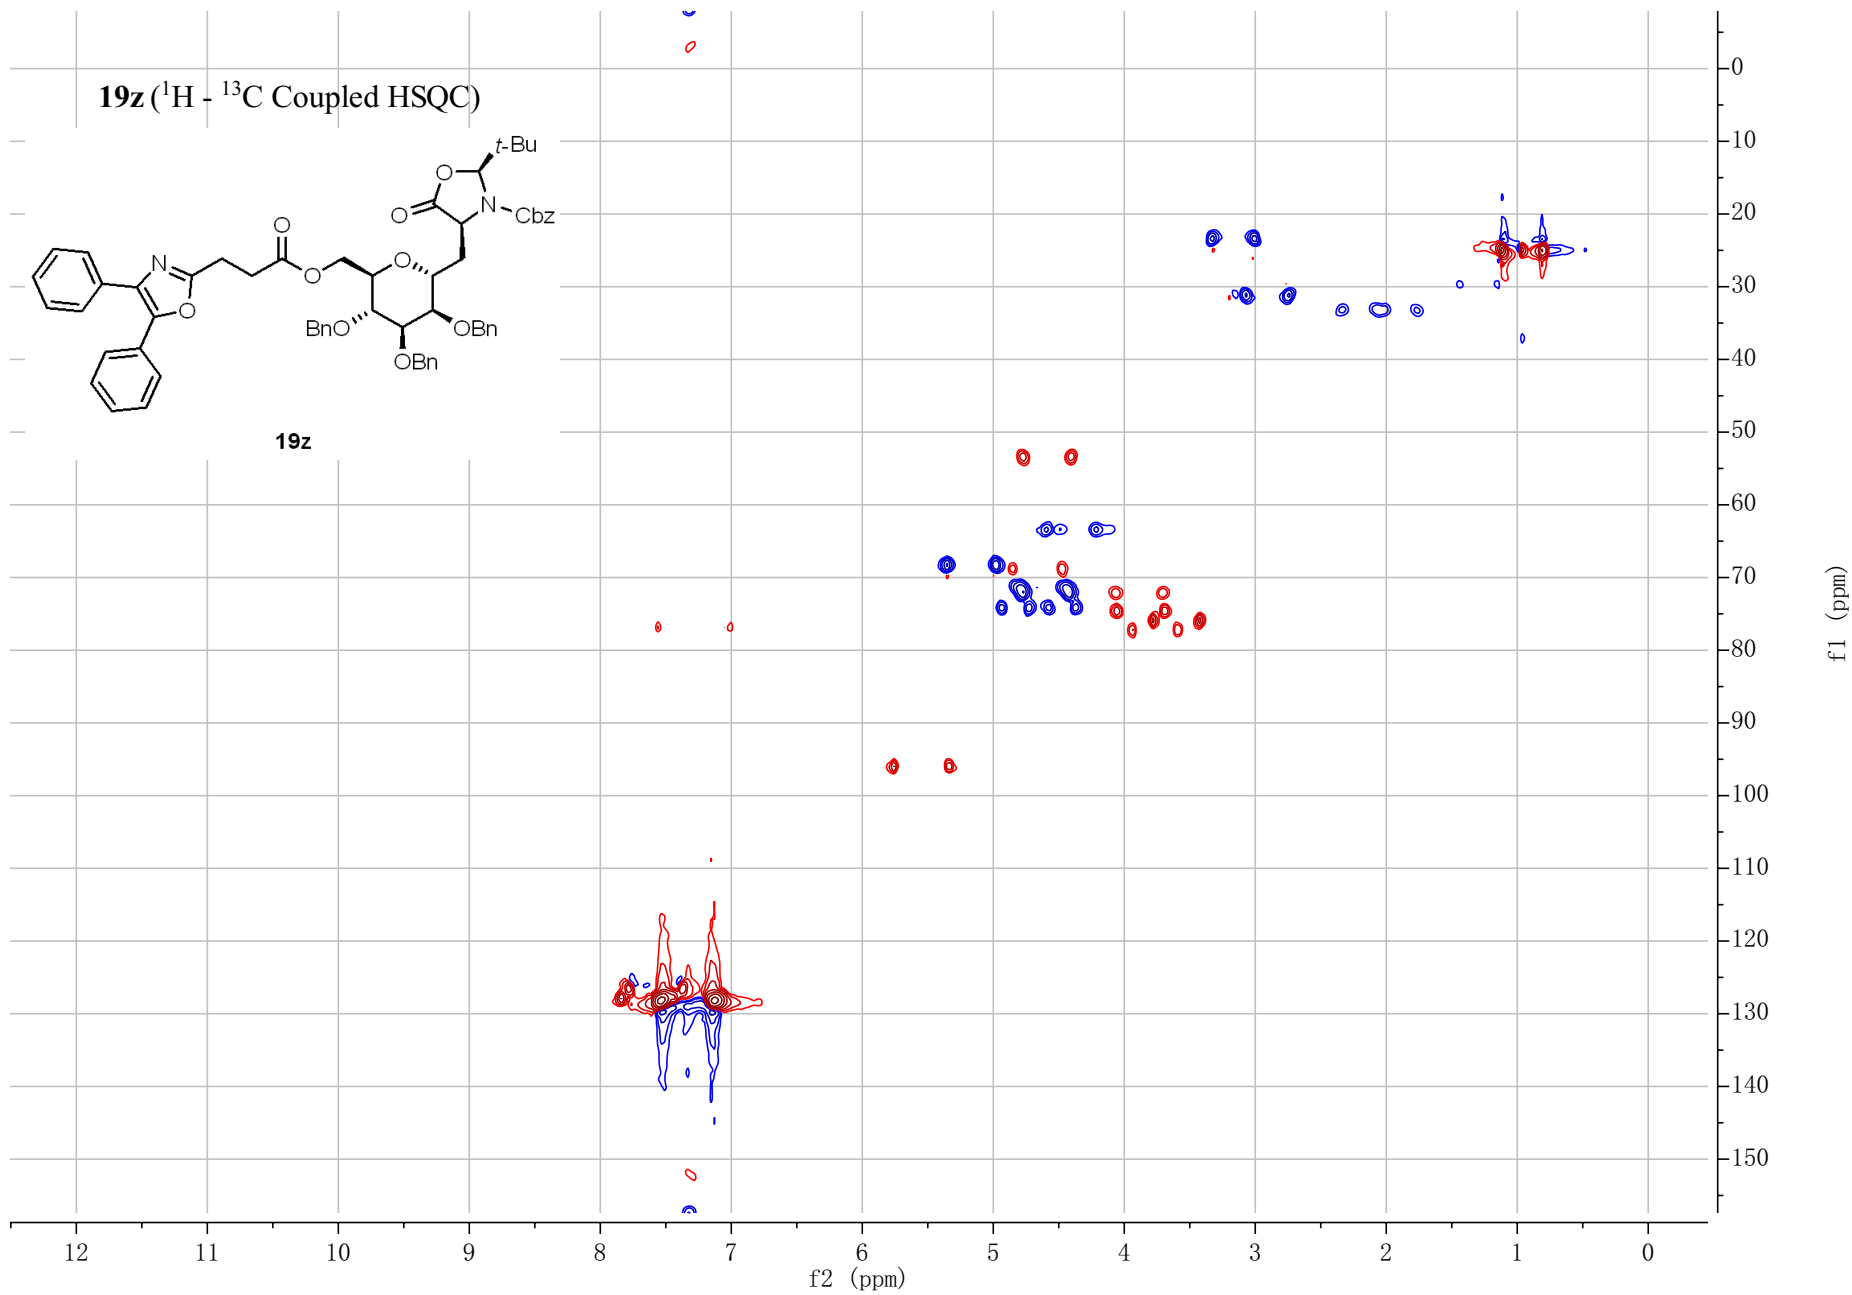

S203

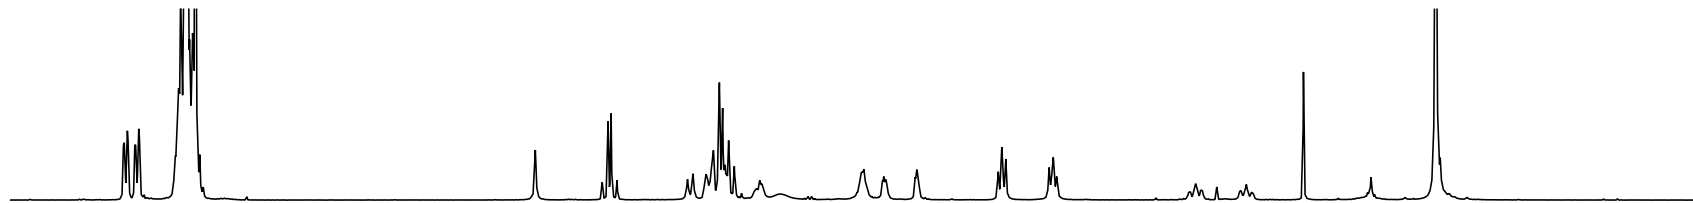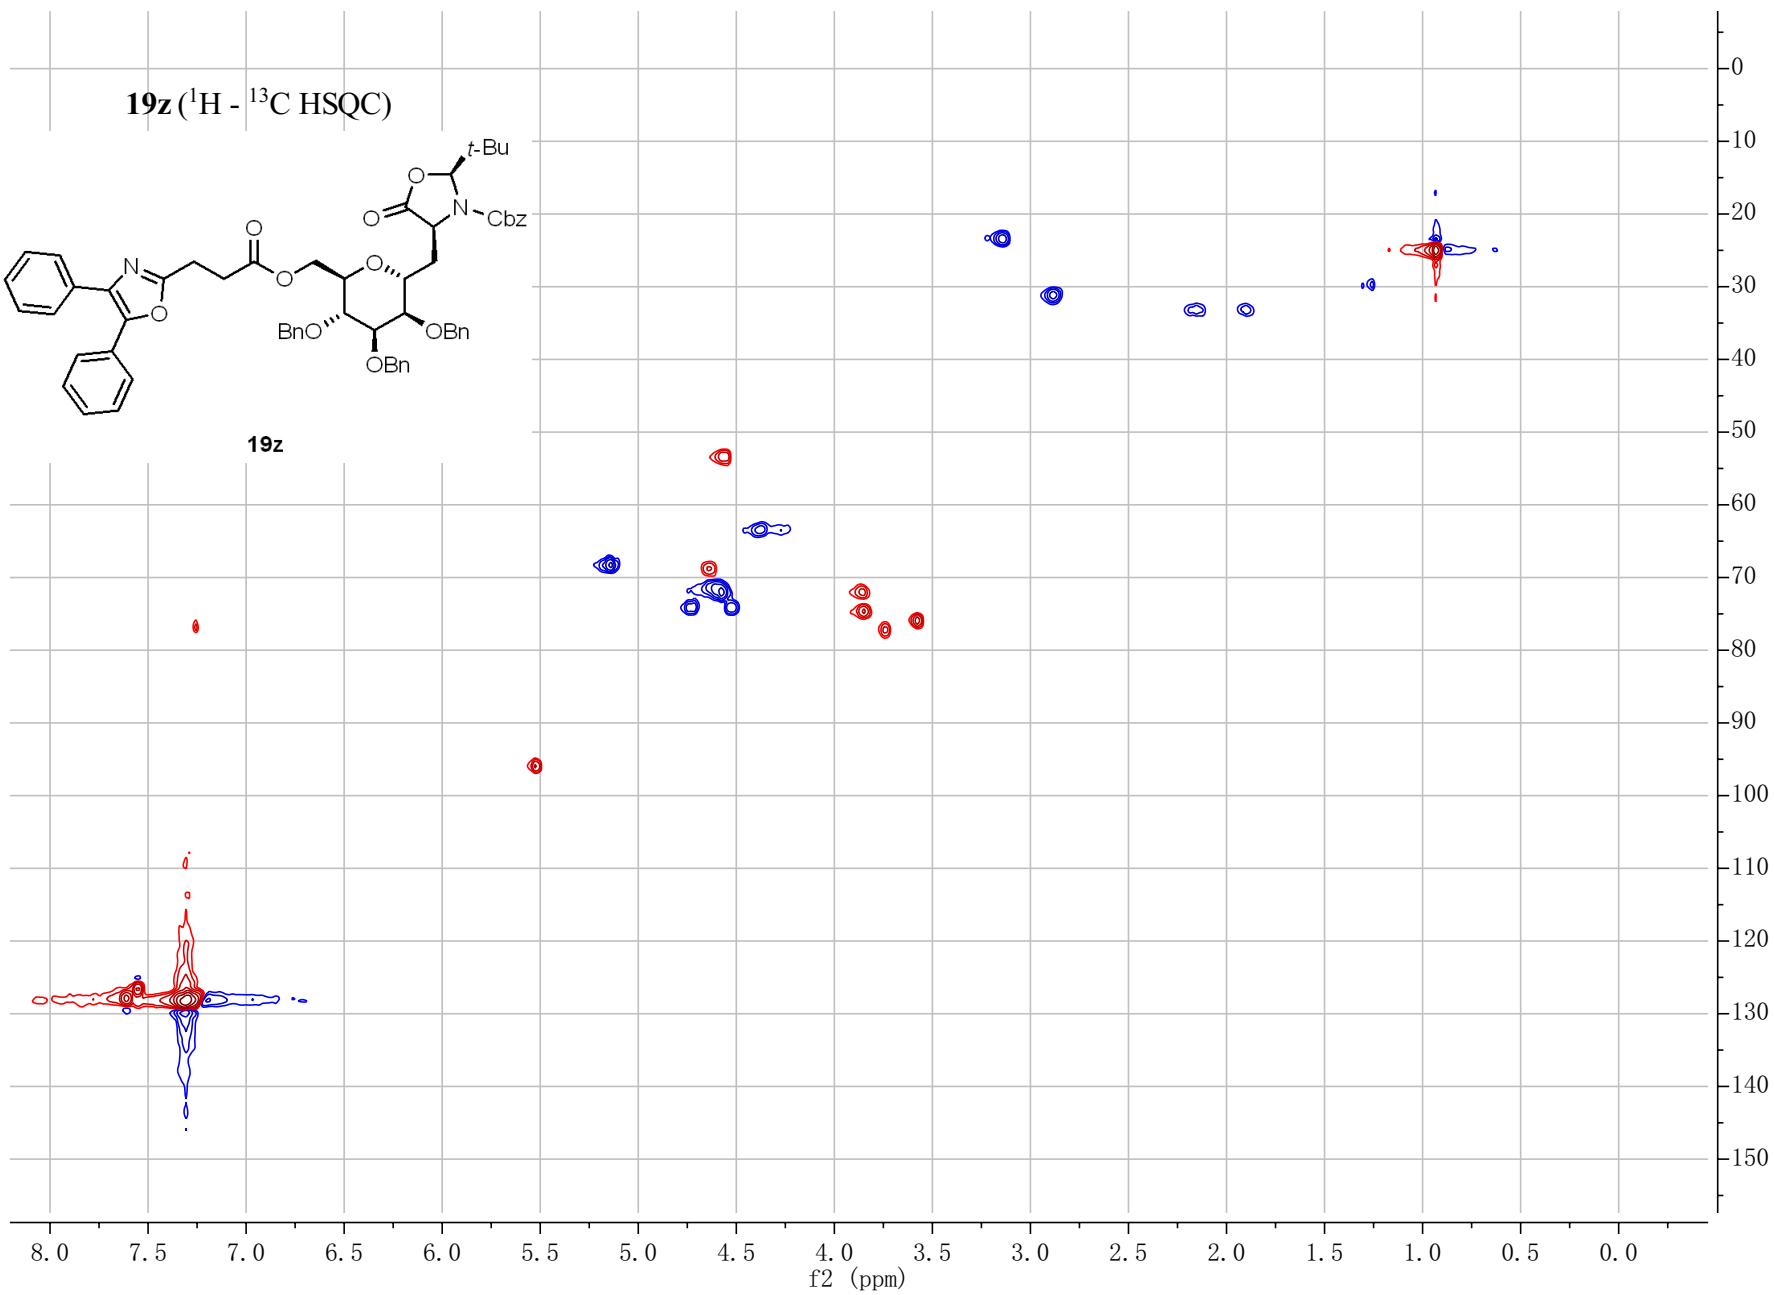

8.58  
8.58  
8.01  
8.00  
7.86  
7.85  
7.84  
7.83  
7.78  
7.77  
7.62  
7.62  
7.58  
7.56  
7.55  
7.43  
7.42  
7.41  
7.40  
7.36  
7.35  
7.35  
7.34  
7.33  
7.32  
7.31  
7.31  
7.30  
7.29  
7.29  
7.29  
7.28  
7.27  
7.26  
7.03  
7.01  
5.54  
5.13  
4.70  
4.69  
4.67  
4.67  
4.66  
4.65  
4.64  
4.63  
4.62  
4.60  
3.92  
2.21  
2.21  
2.17  
2.13  
2.13  
2.12  
1.83  
1.82  
1.82  
0.95

**19aa** ( $^1\text{H}$  NMR, 400MHz,  $\text{CDCl}_3$ )

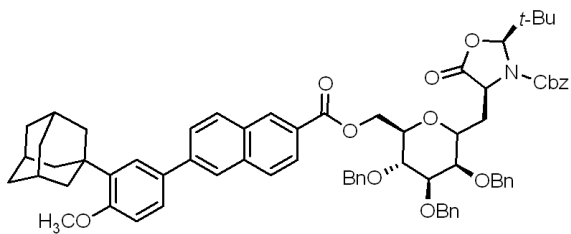

**19aa, major**

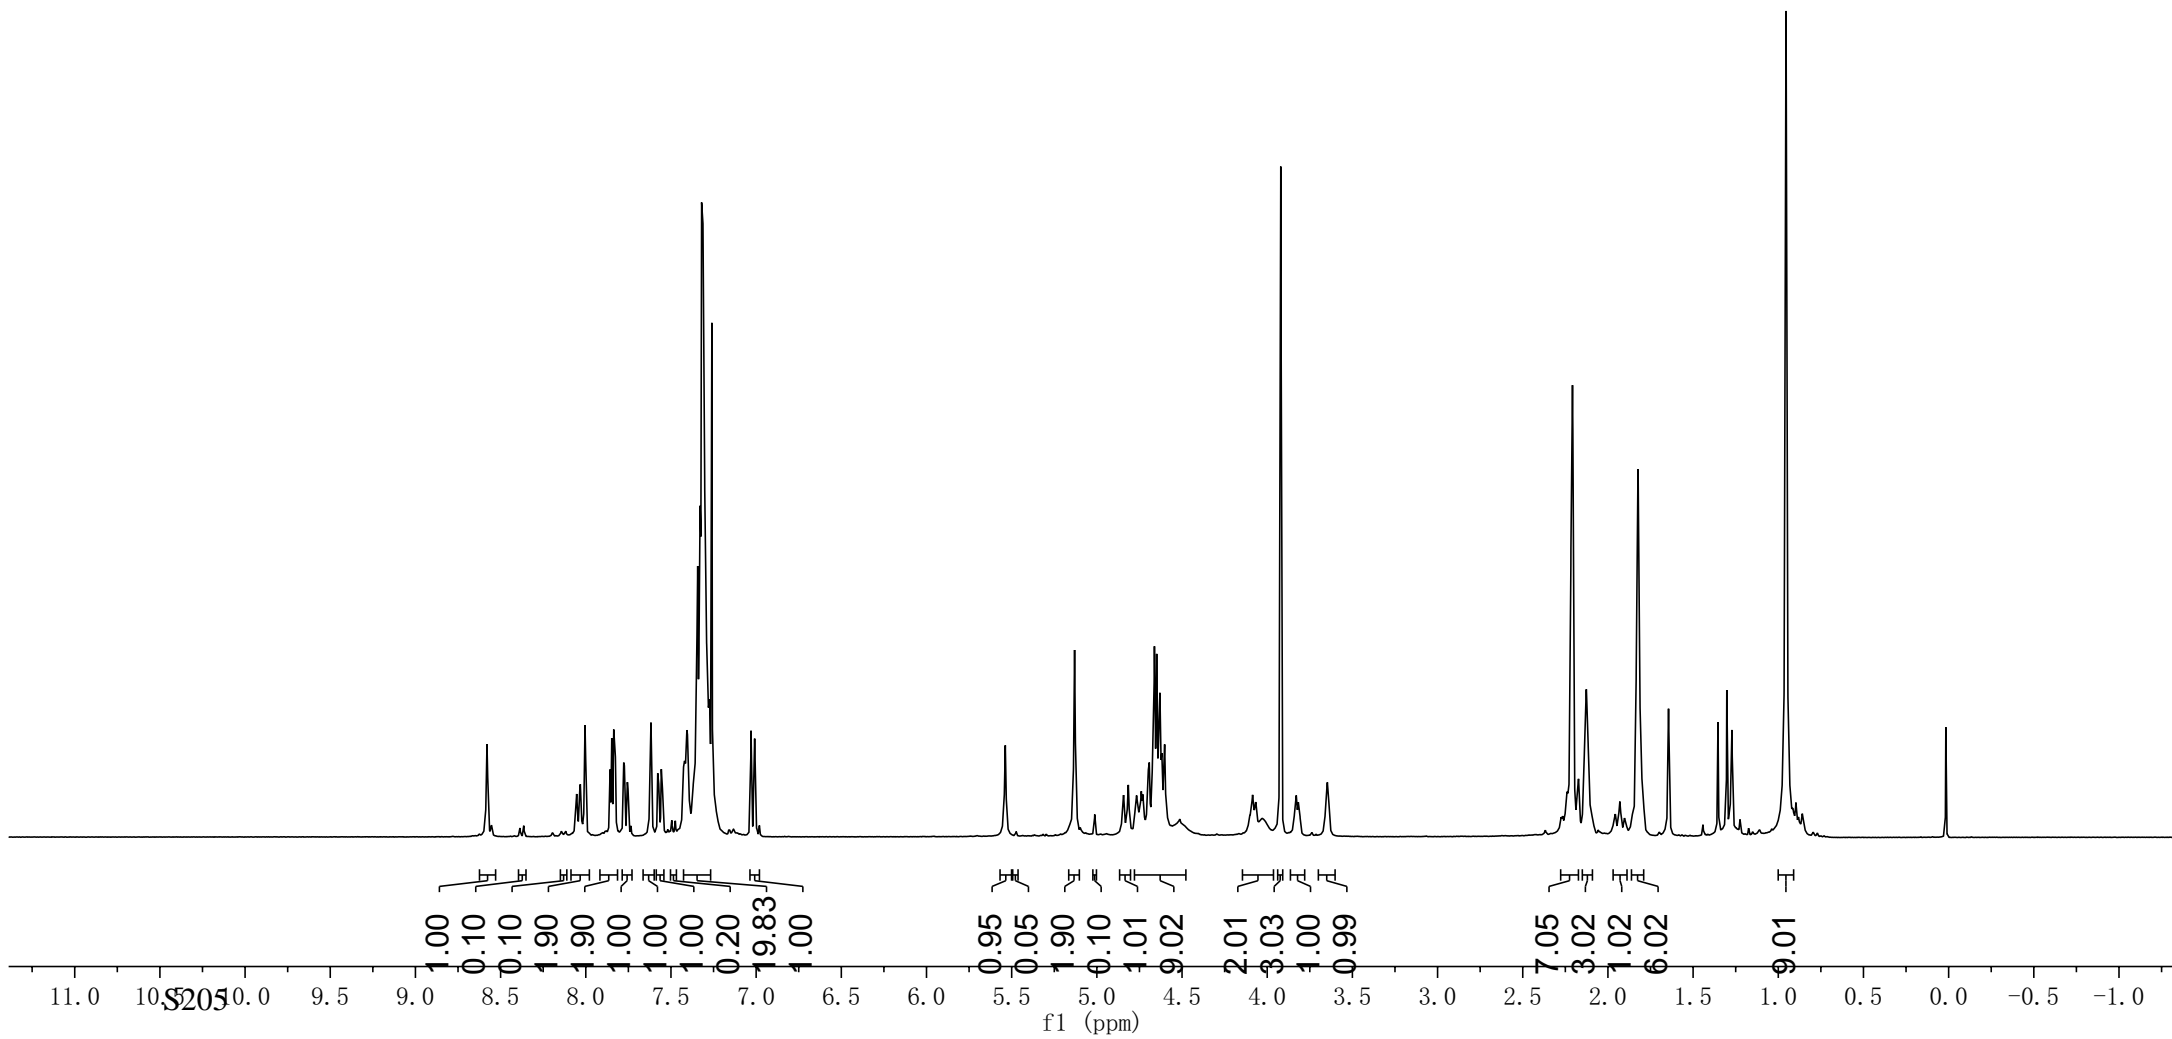



**19aa** ( $^{13}\text{C}$  NMR, 101MHz,  $\text{CDCl}_3$ )

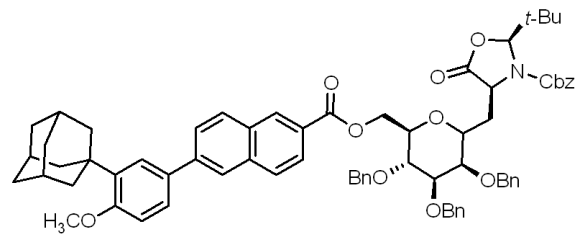

**19aa, major**

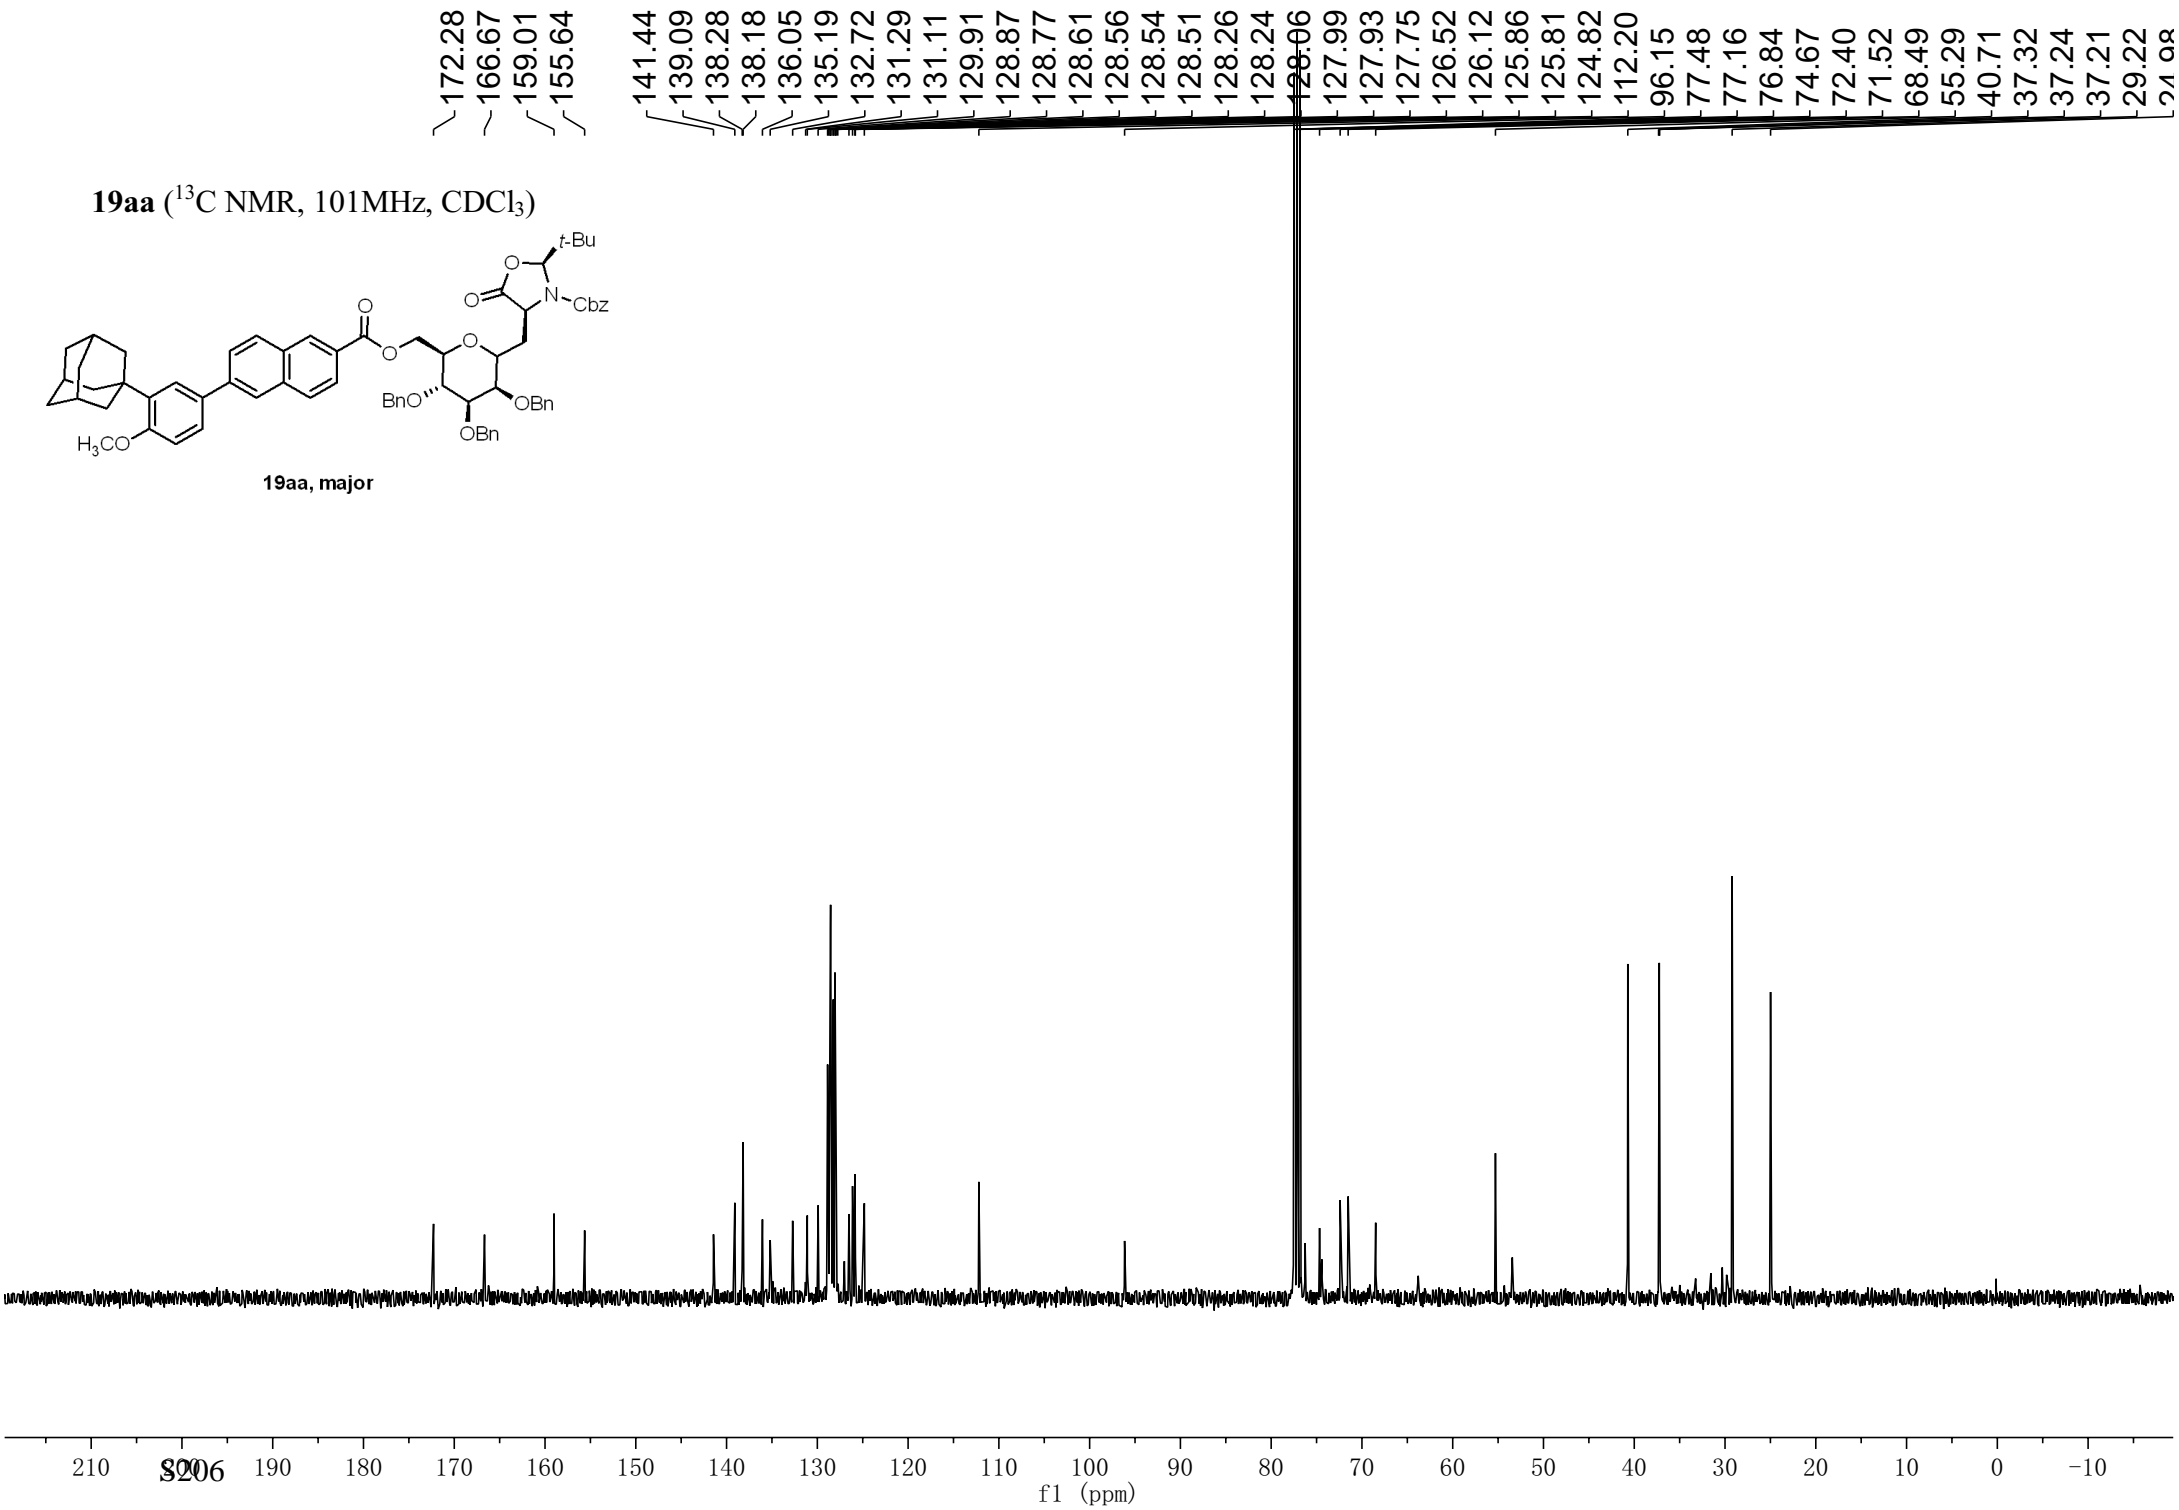

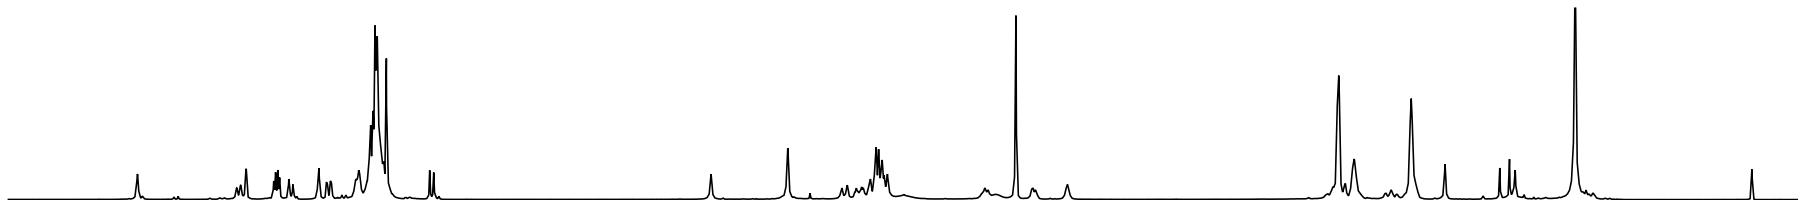

**19aa** ( $^1\text{H} - ^1\text{H}$  COSY)

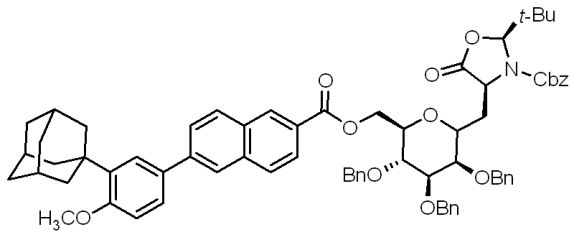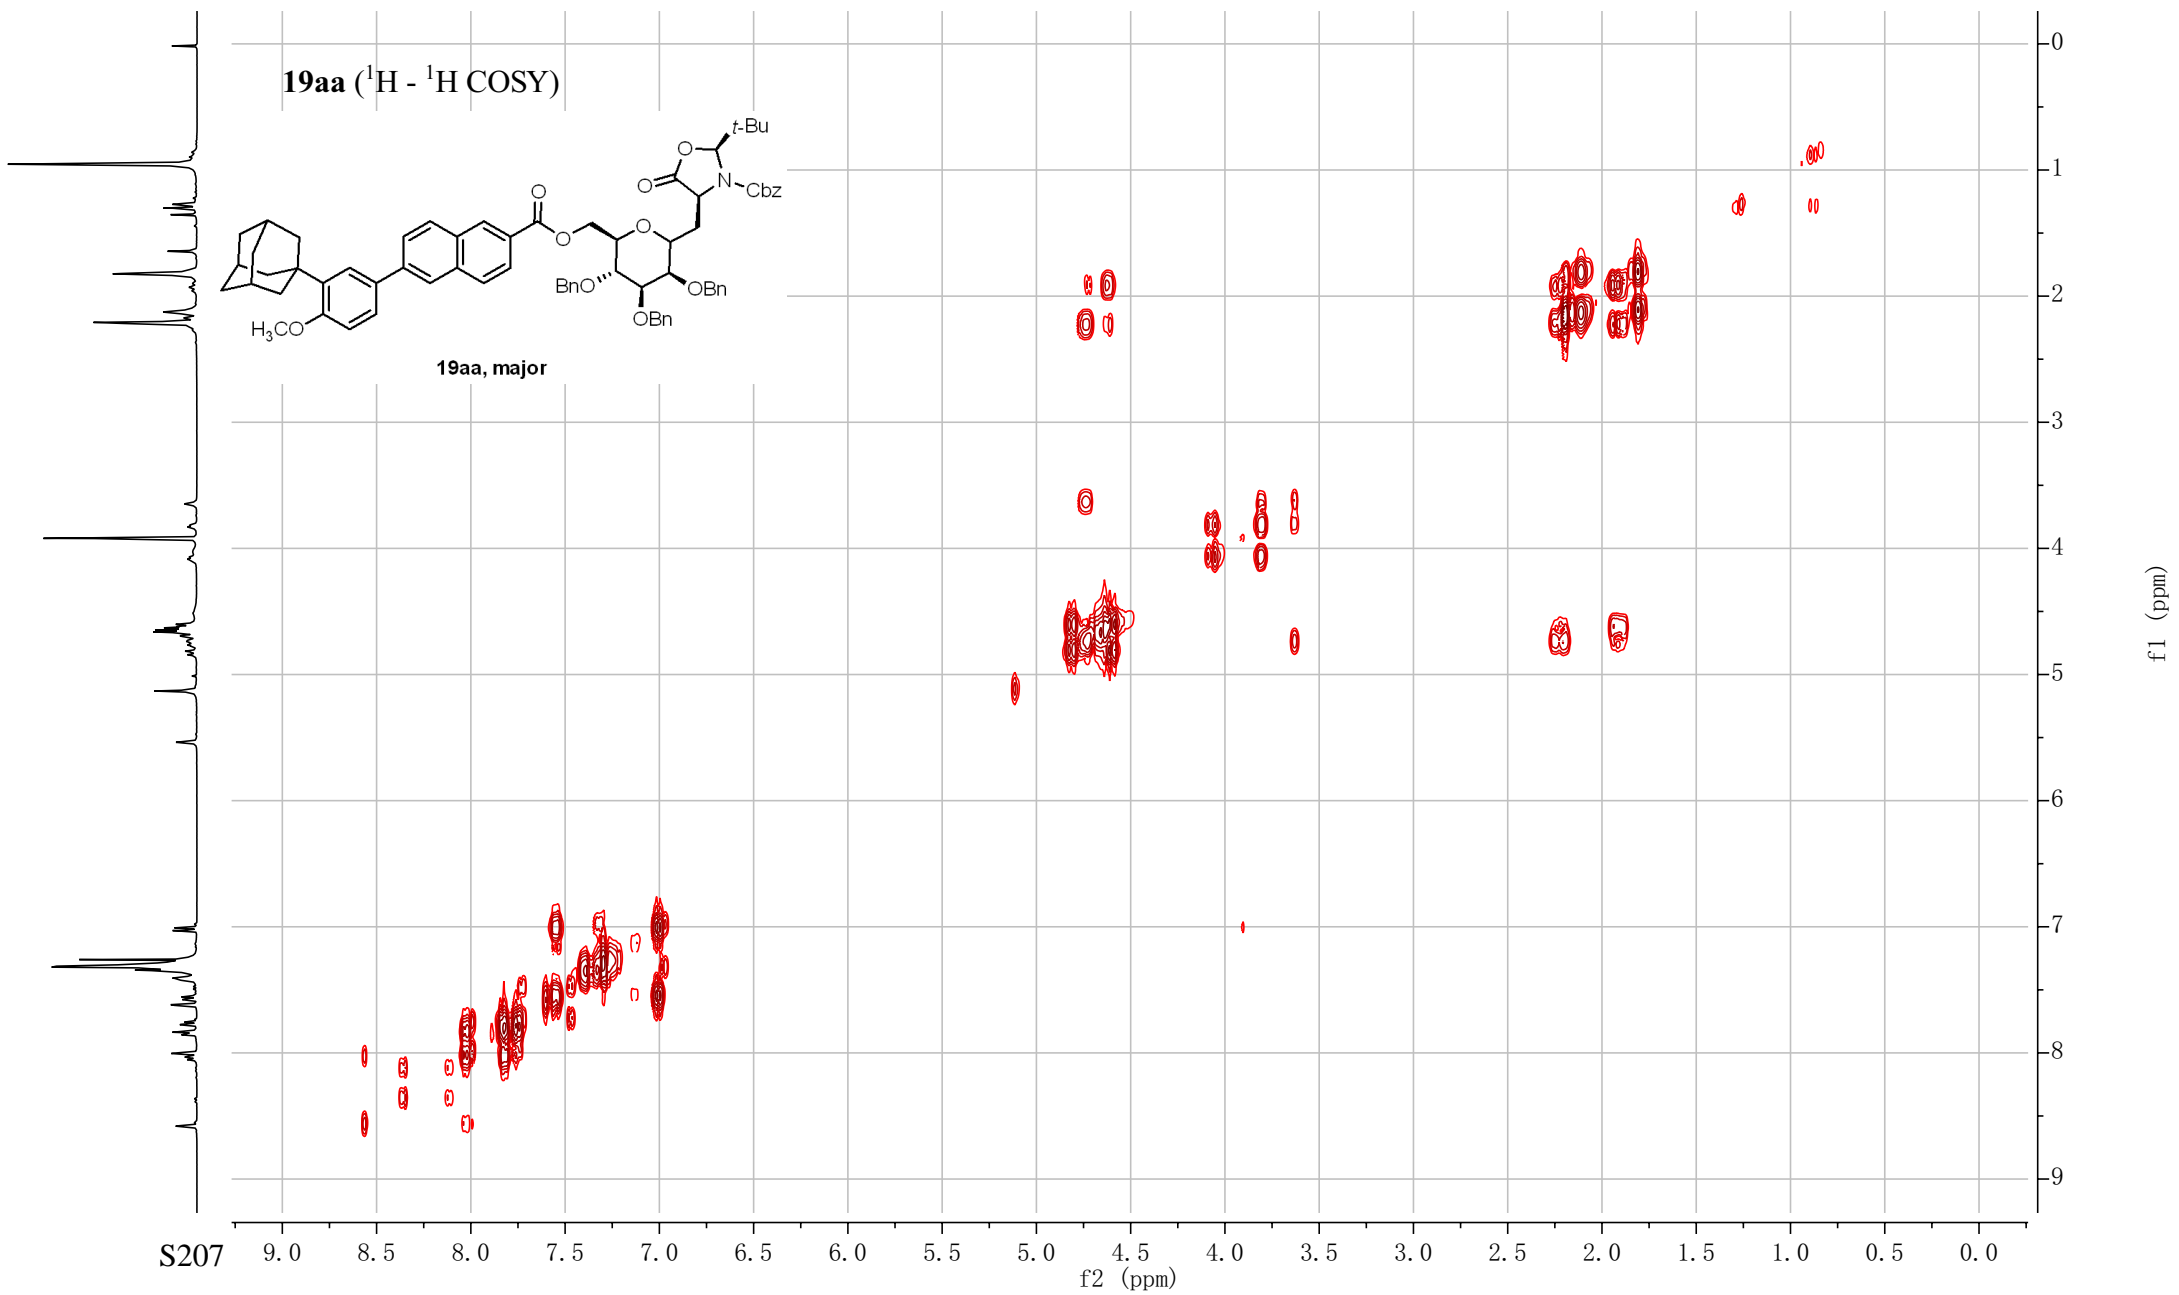

S207

f2 (ppm)

f1 (ppm)

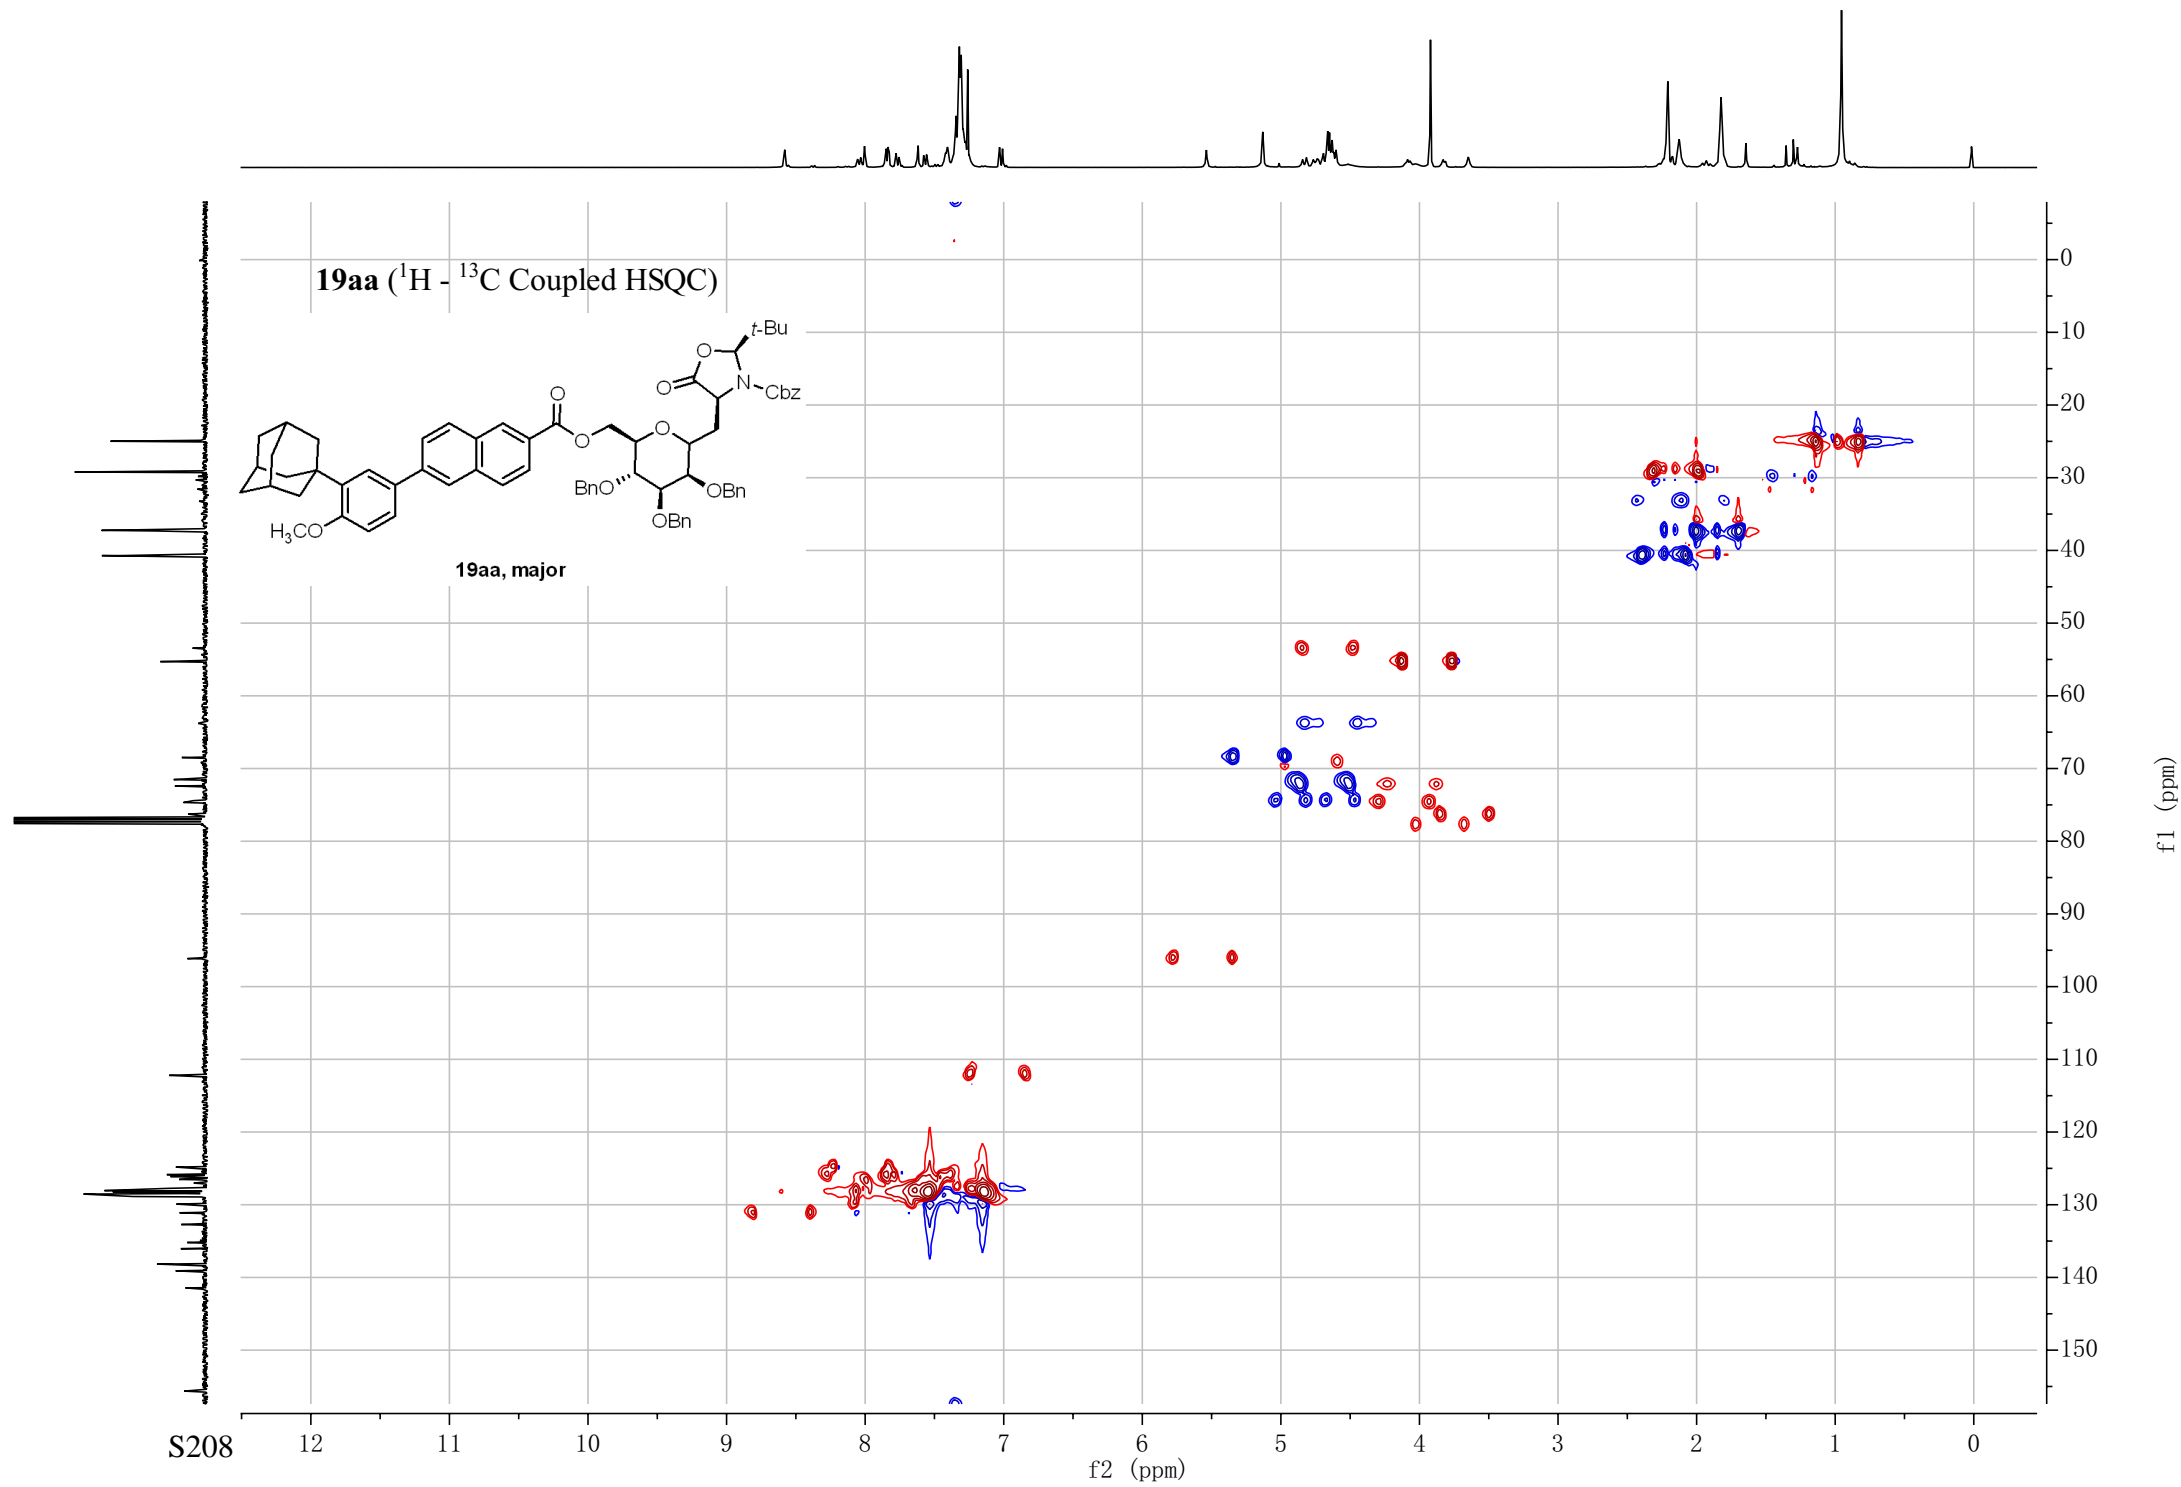



7.26  
5.14  
5.12  
5.10  
4.77  
4.76  
4.75  
4.74  
4.54  
4.53  
4.52  
4.52  
4.38  
4.36  
4.36  
4.35  
4.35  
4.34  
4.34  
4.33  
4.31  
4.30  
4.29  
4.12  
4.11  
4.10  
4.09  
4.09  
4.07  
4.07  
4.05  
4.04  
3.74  
3.73  
3.71  
3.70  
3.66  
3.65  
3.64  
3.63  
2.30  
2.29  
2.28  
2.27  
2.26  
2.26  
2.25  
1.88  
1.87  
1.87  
1.86  
1.49  
1.48  
1.47  
1.43  
1.40  
1.36  
1.33  
1.33

**21a** (<sup>1</sup>H NMR, 400MHz, CDCl<sub>3</sub>)

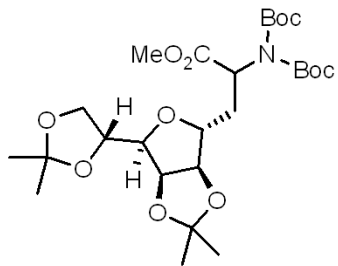

**21a**

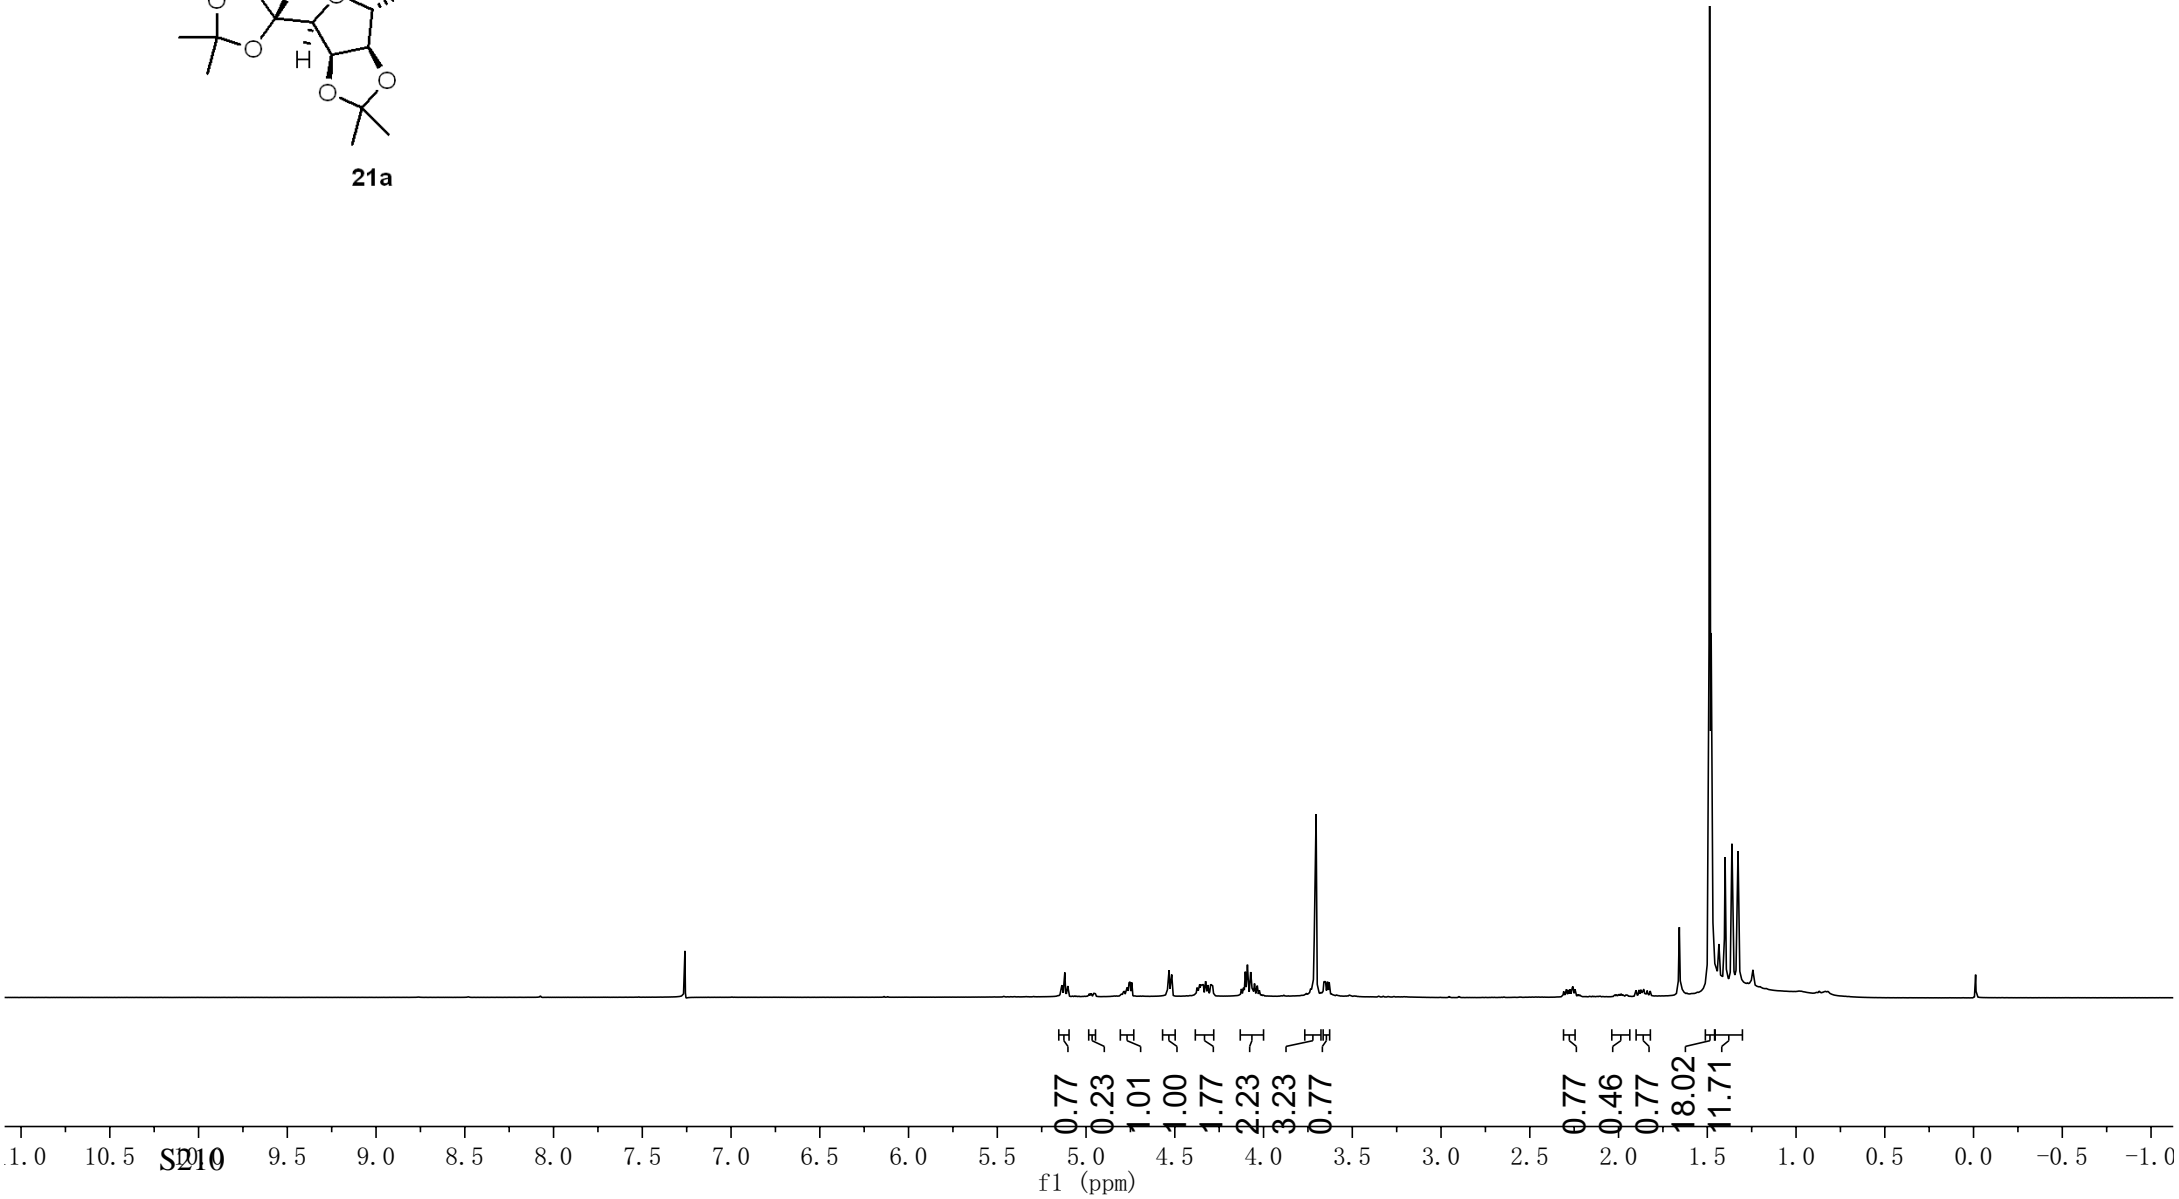

**21a** ( $^{13}\text{C}$  NMR, 101MHz,  $\text{CDCl}_3$ )

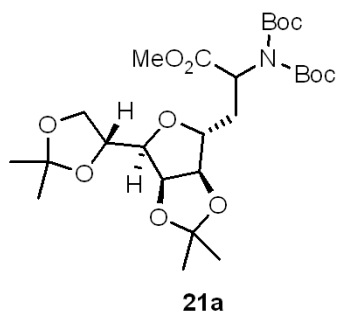

171.40  
171.02

152.19  
151.94

112.80  
112.73  
109.38  
109.32  
85.66  
85.42  
83.48  
83.31  
82.50  
80.98  
80.90  
80.80  
80.51  
80.19  
77.48  
77.16  
76.84  
73.37  
73.31  
67.33  
67.30  
55.59  
55.45  
52.52  
52.41  
31.58  
30.90  
28.10  
28.08  
27.12  
27.03  
26.25  
25.36  
25.29  
24.95  
24.93

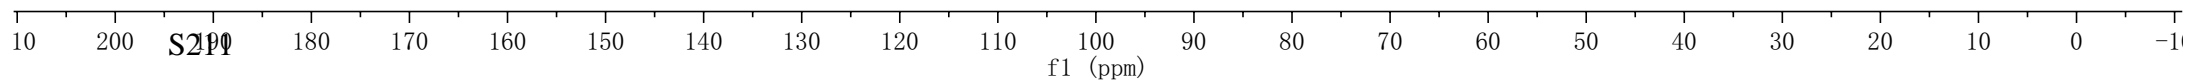

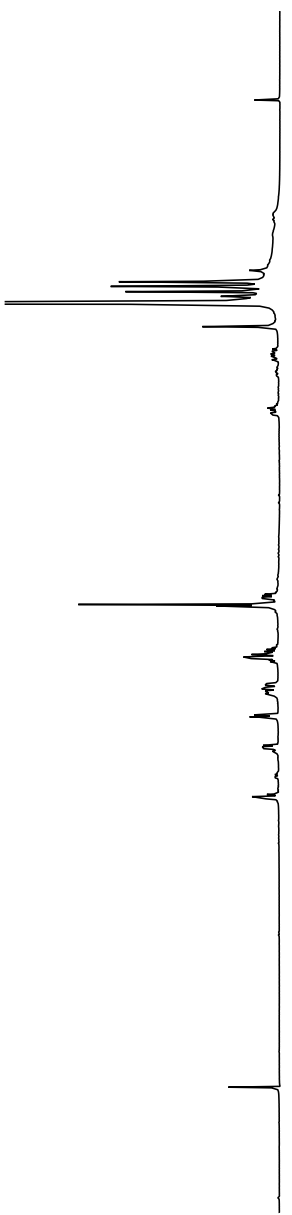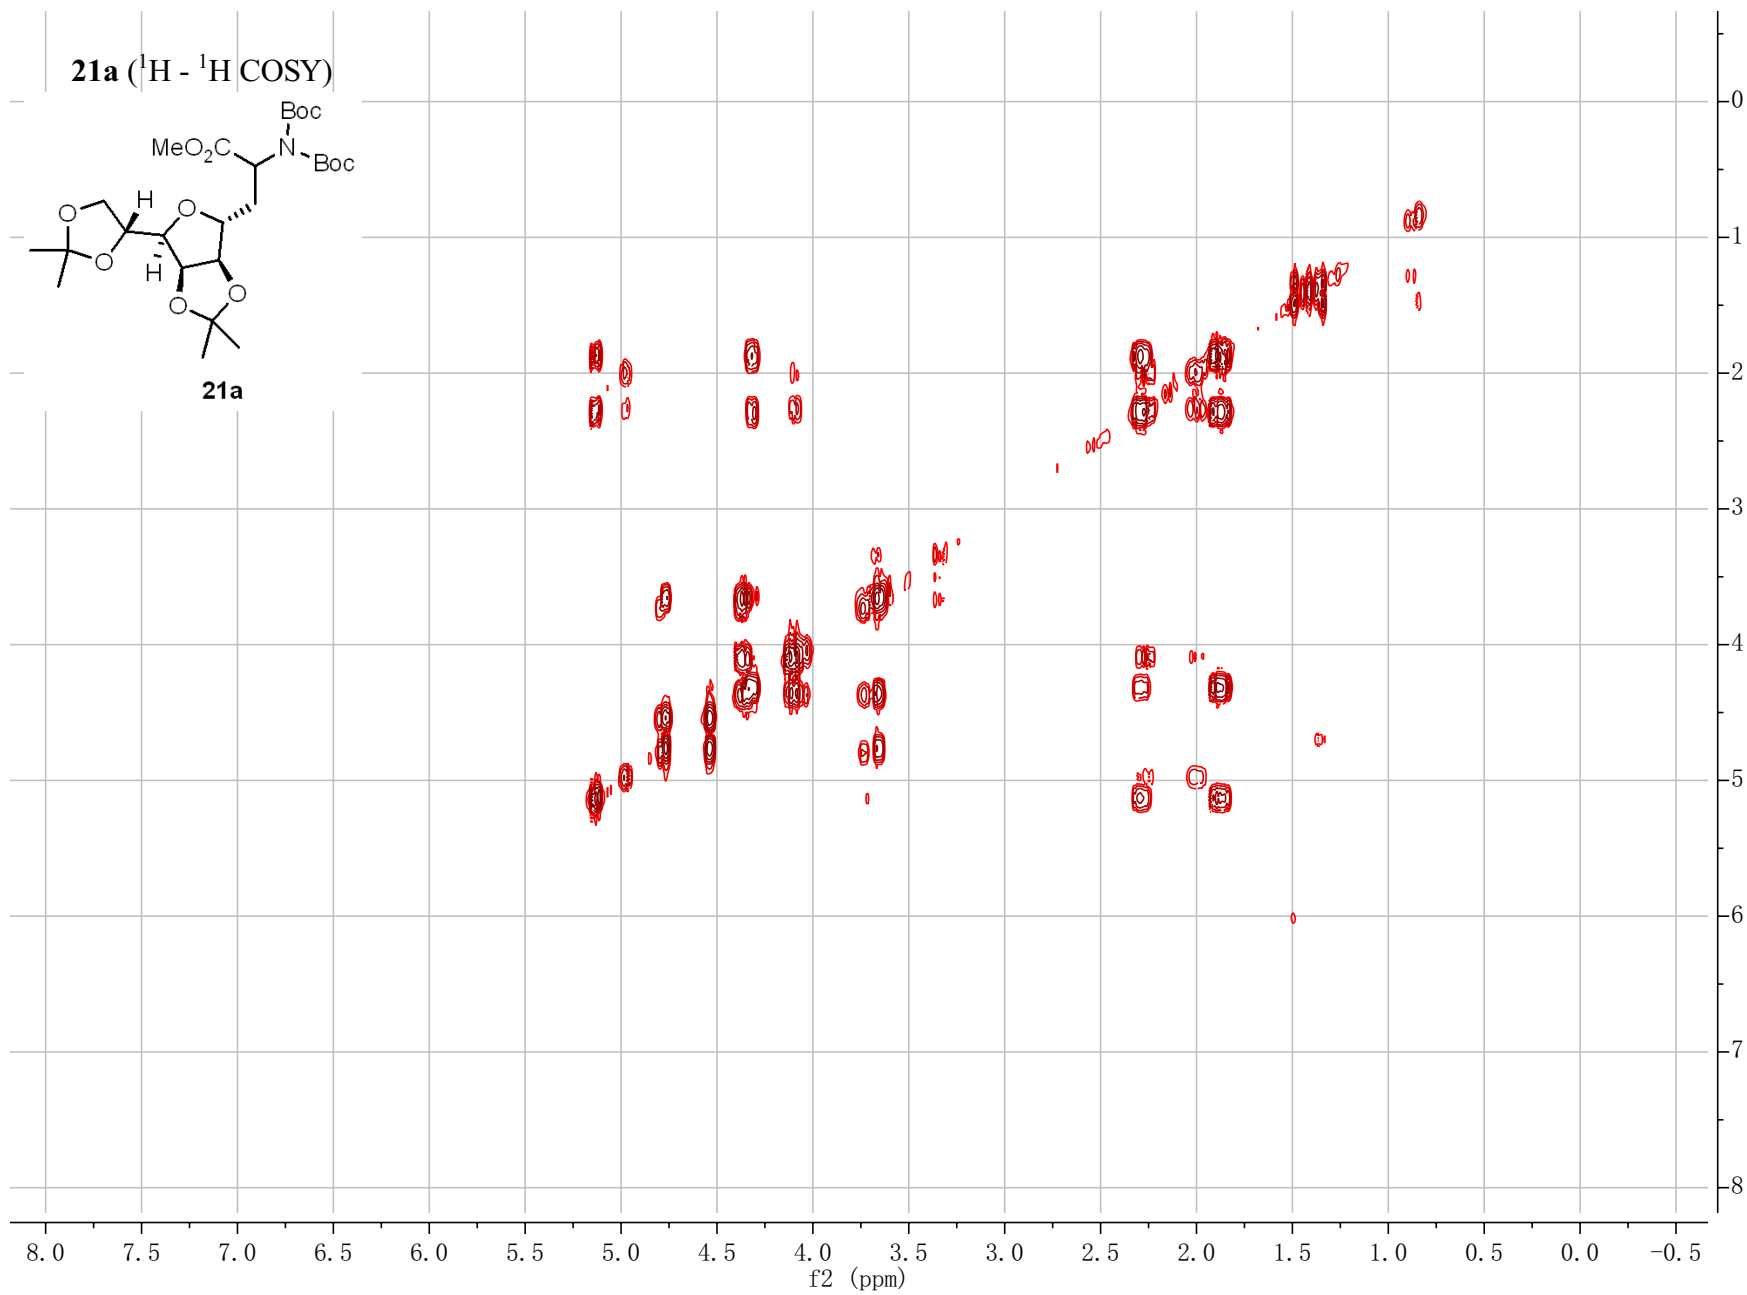

S212

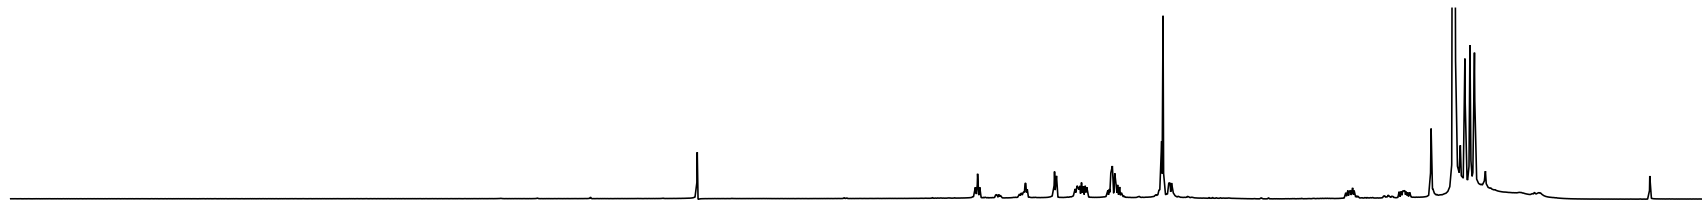

**21a** ( $^1\text{H}$  -  $^{13}\text{C}$  Coupled HSQC)

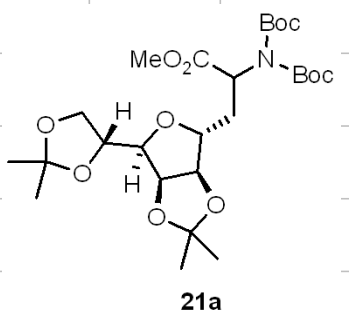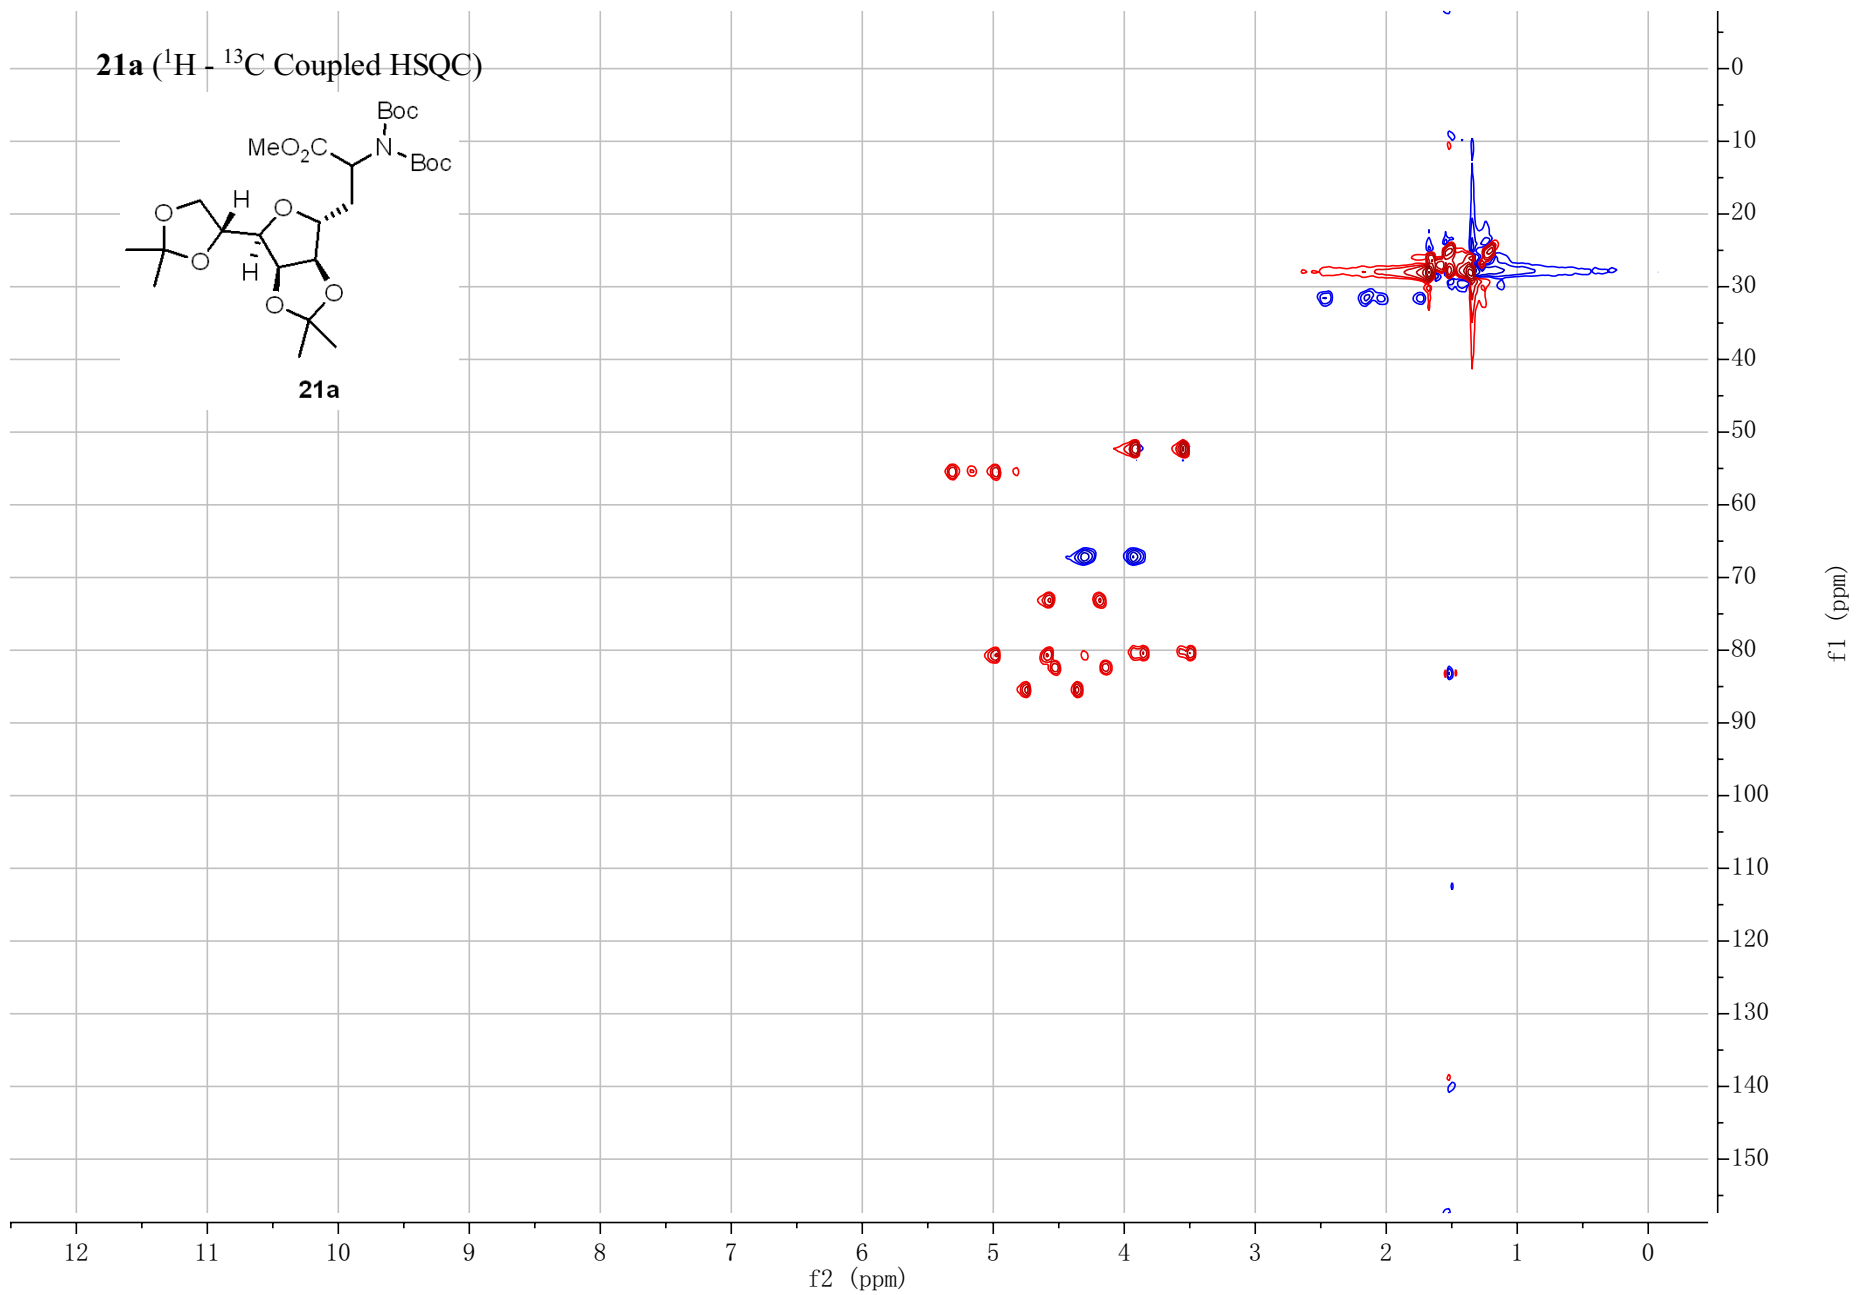

S213



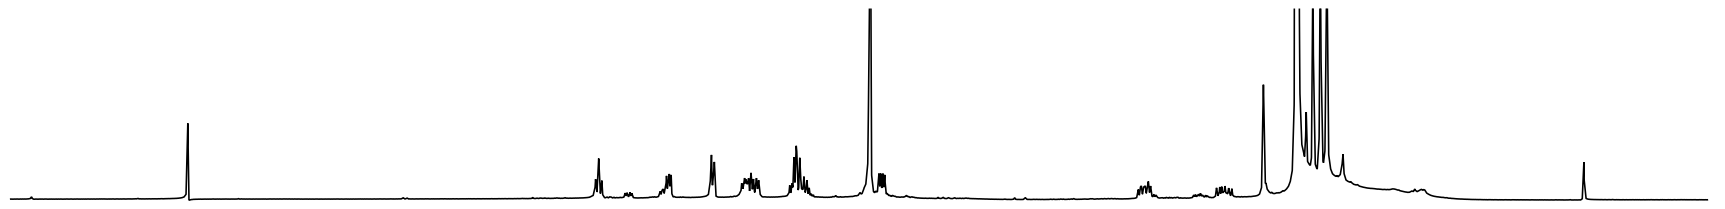

**21a** ( $^1\text{H} - ^{13}\text{C}$  HSQC)

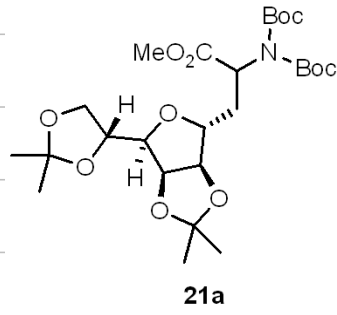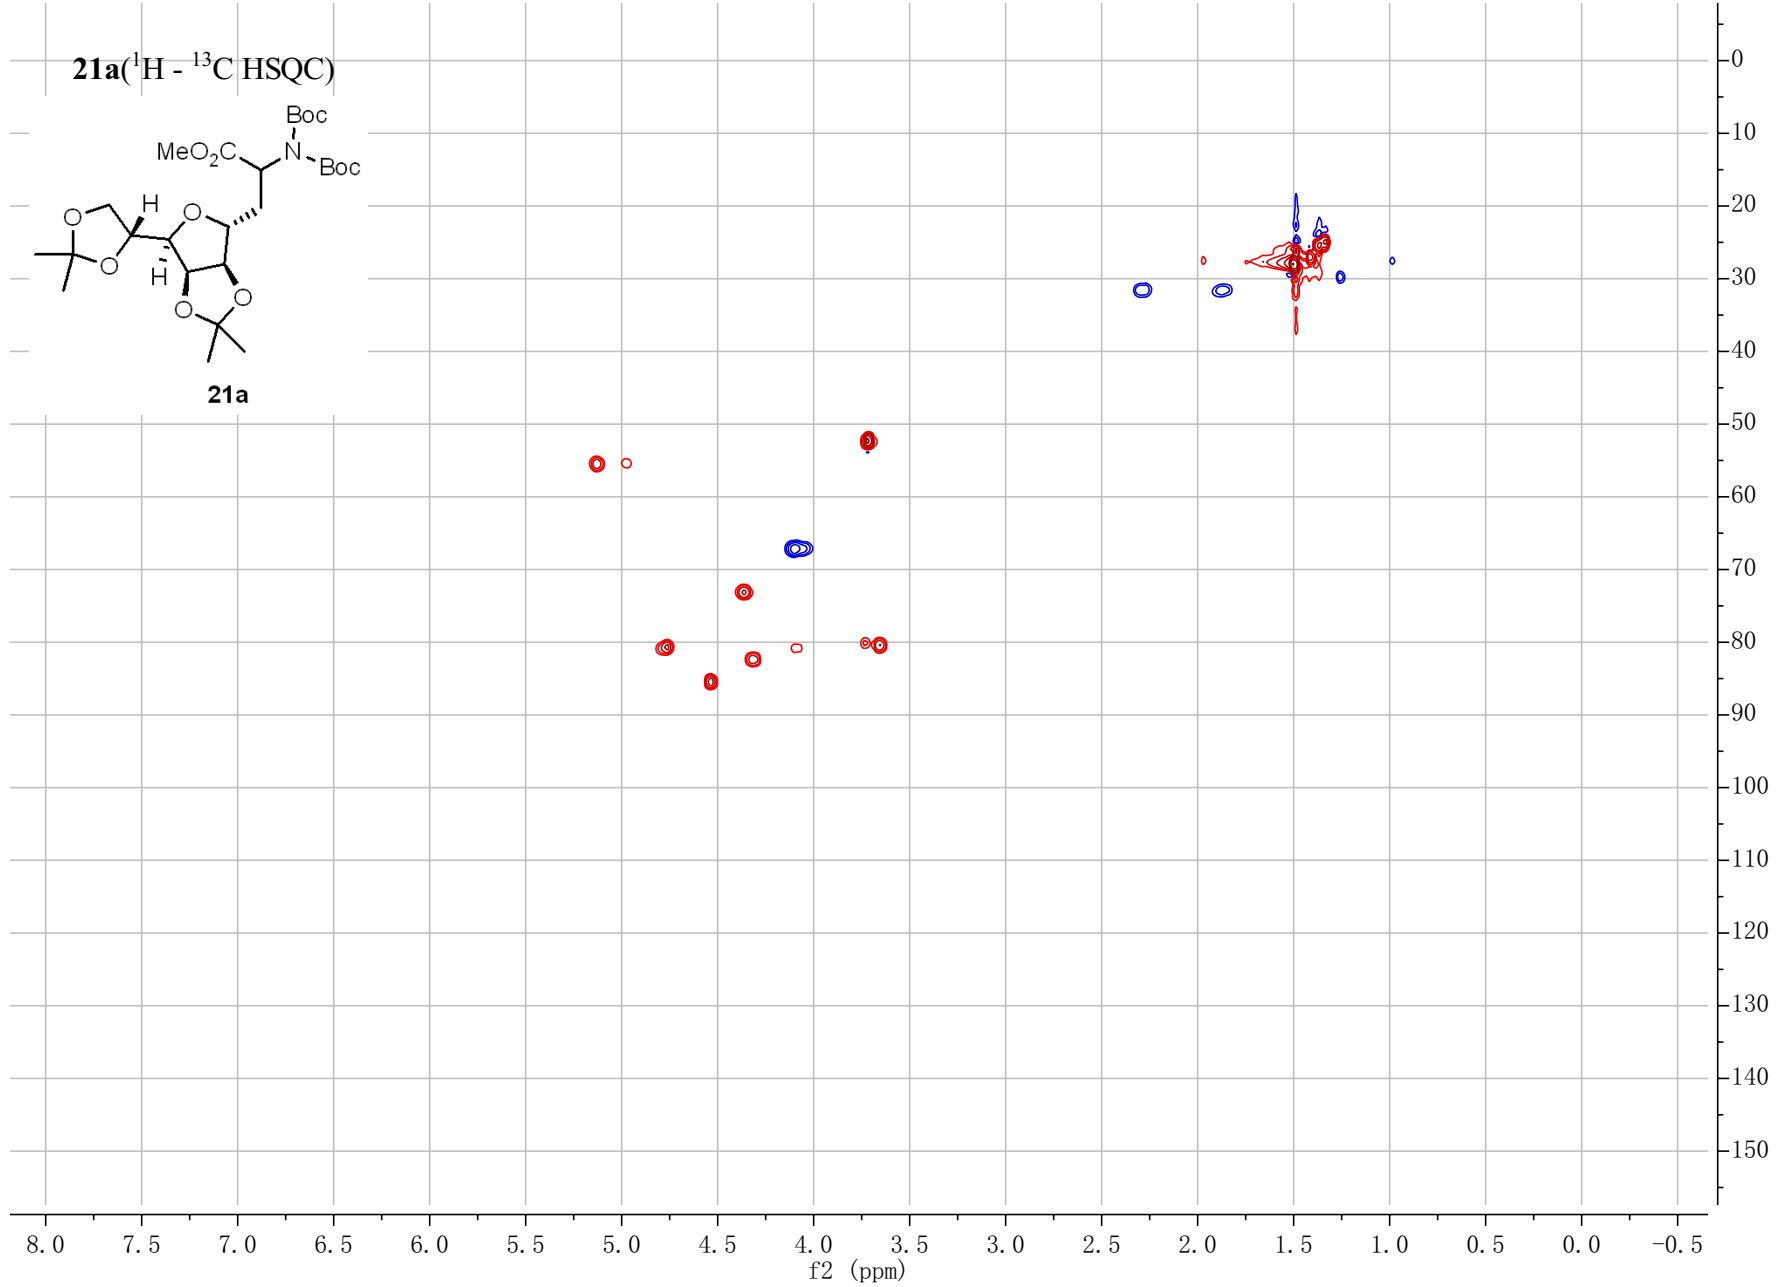

S214

7.26  
4.78  
4.77  
4.76  
4.76  
4.71  
4.70  
4.70  
4.69  
4.57  
4.56  
4.51  
4.49  
4.48  
4.48  
4.46  
4.42  
4.38  
4.38  
4.37  
4.37  
4.36  
4.35  
4.35  
4.07  
4.05  
4.05  
4.04  
4.03  
4.01  
4.00  
3.99  
3.97  
3.95  
3.93  
3.93  
3.91  
3.91  
3.90  
3.89  
3.88  
3.77  
3.76  
3.75  
3.69  
3.69  
2.42  
2.41  
2.21  
2.19  
2.18  
2.17  
2.16  
1.45  
1.40  
1.38  
1.34  
1.33  
1.29

**21b** ( $^1\text{H}$  NMR, 400MHz,  $\text{CDCl}_3$ )

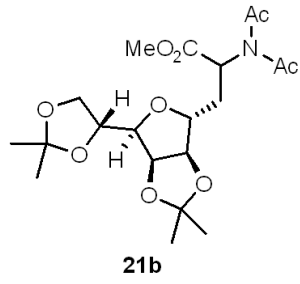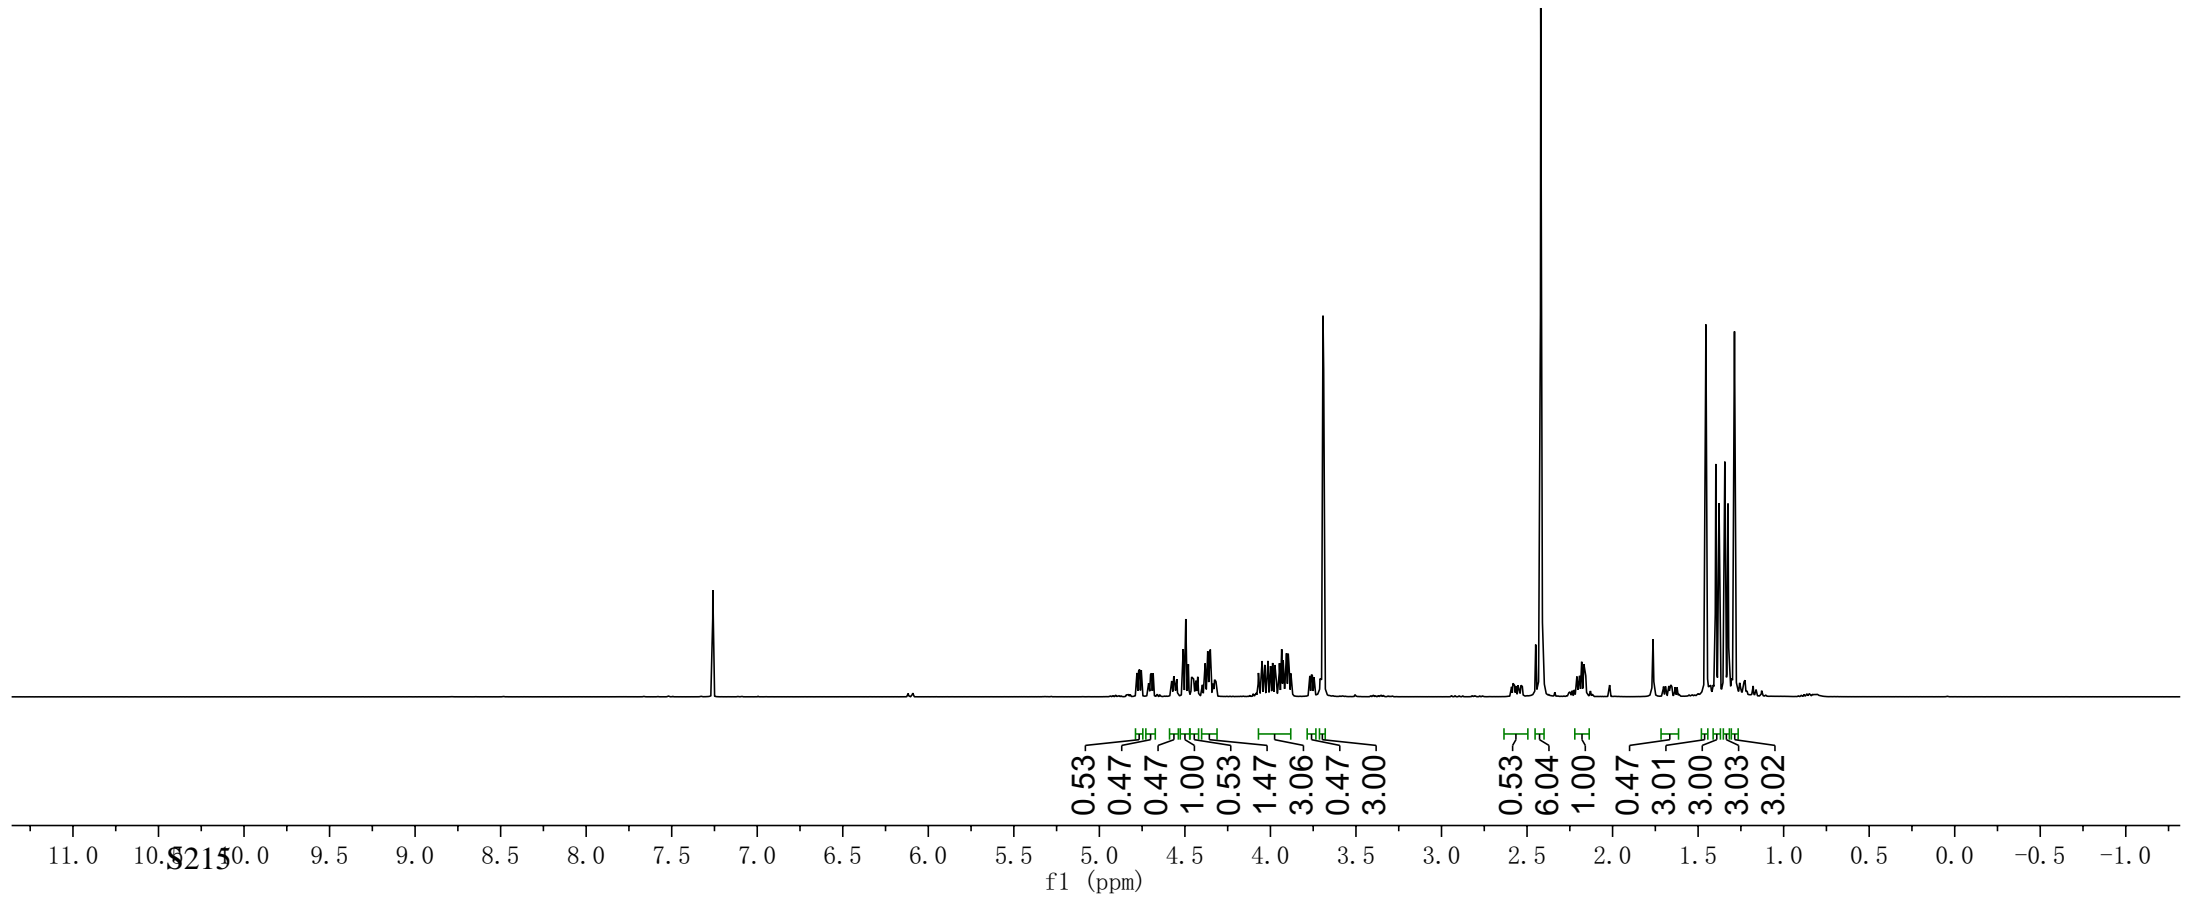

173.52  
173.09  
170.37  
170.03

112.87  
112.82  
108.98  
108.83  
85.22  
85.05  
82.72  
80.56  
80.51  
80.32  
79.94  
79.78  
77.48  
77.16  
76.84  
73.58  
73.54  
66.48  
66.15  
56.62  
56.15  
52.81  
52.78  
31.85  
29.13  
26.93  
26.87  
26.64  
26.41  
26.04  
25.95  
25.21  
25.08  
24.52  
24.36

**21b** ( $^{13}\text{C}$  NMR, 101MHz,  $\text{CDCl}_3$ )

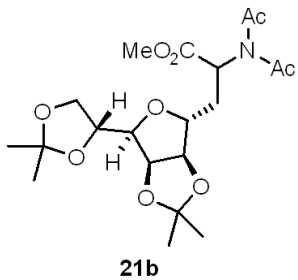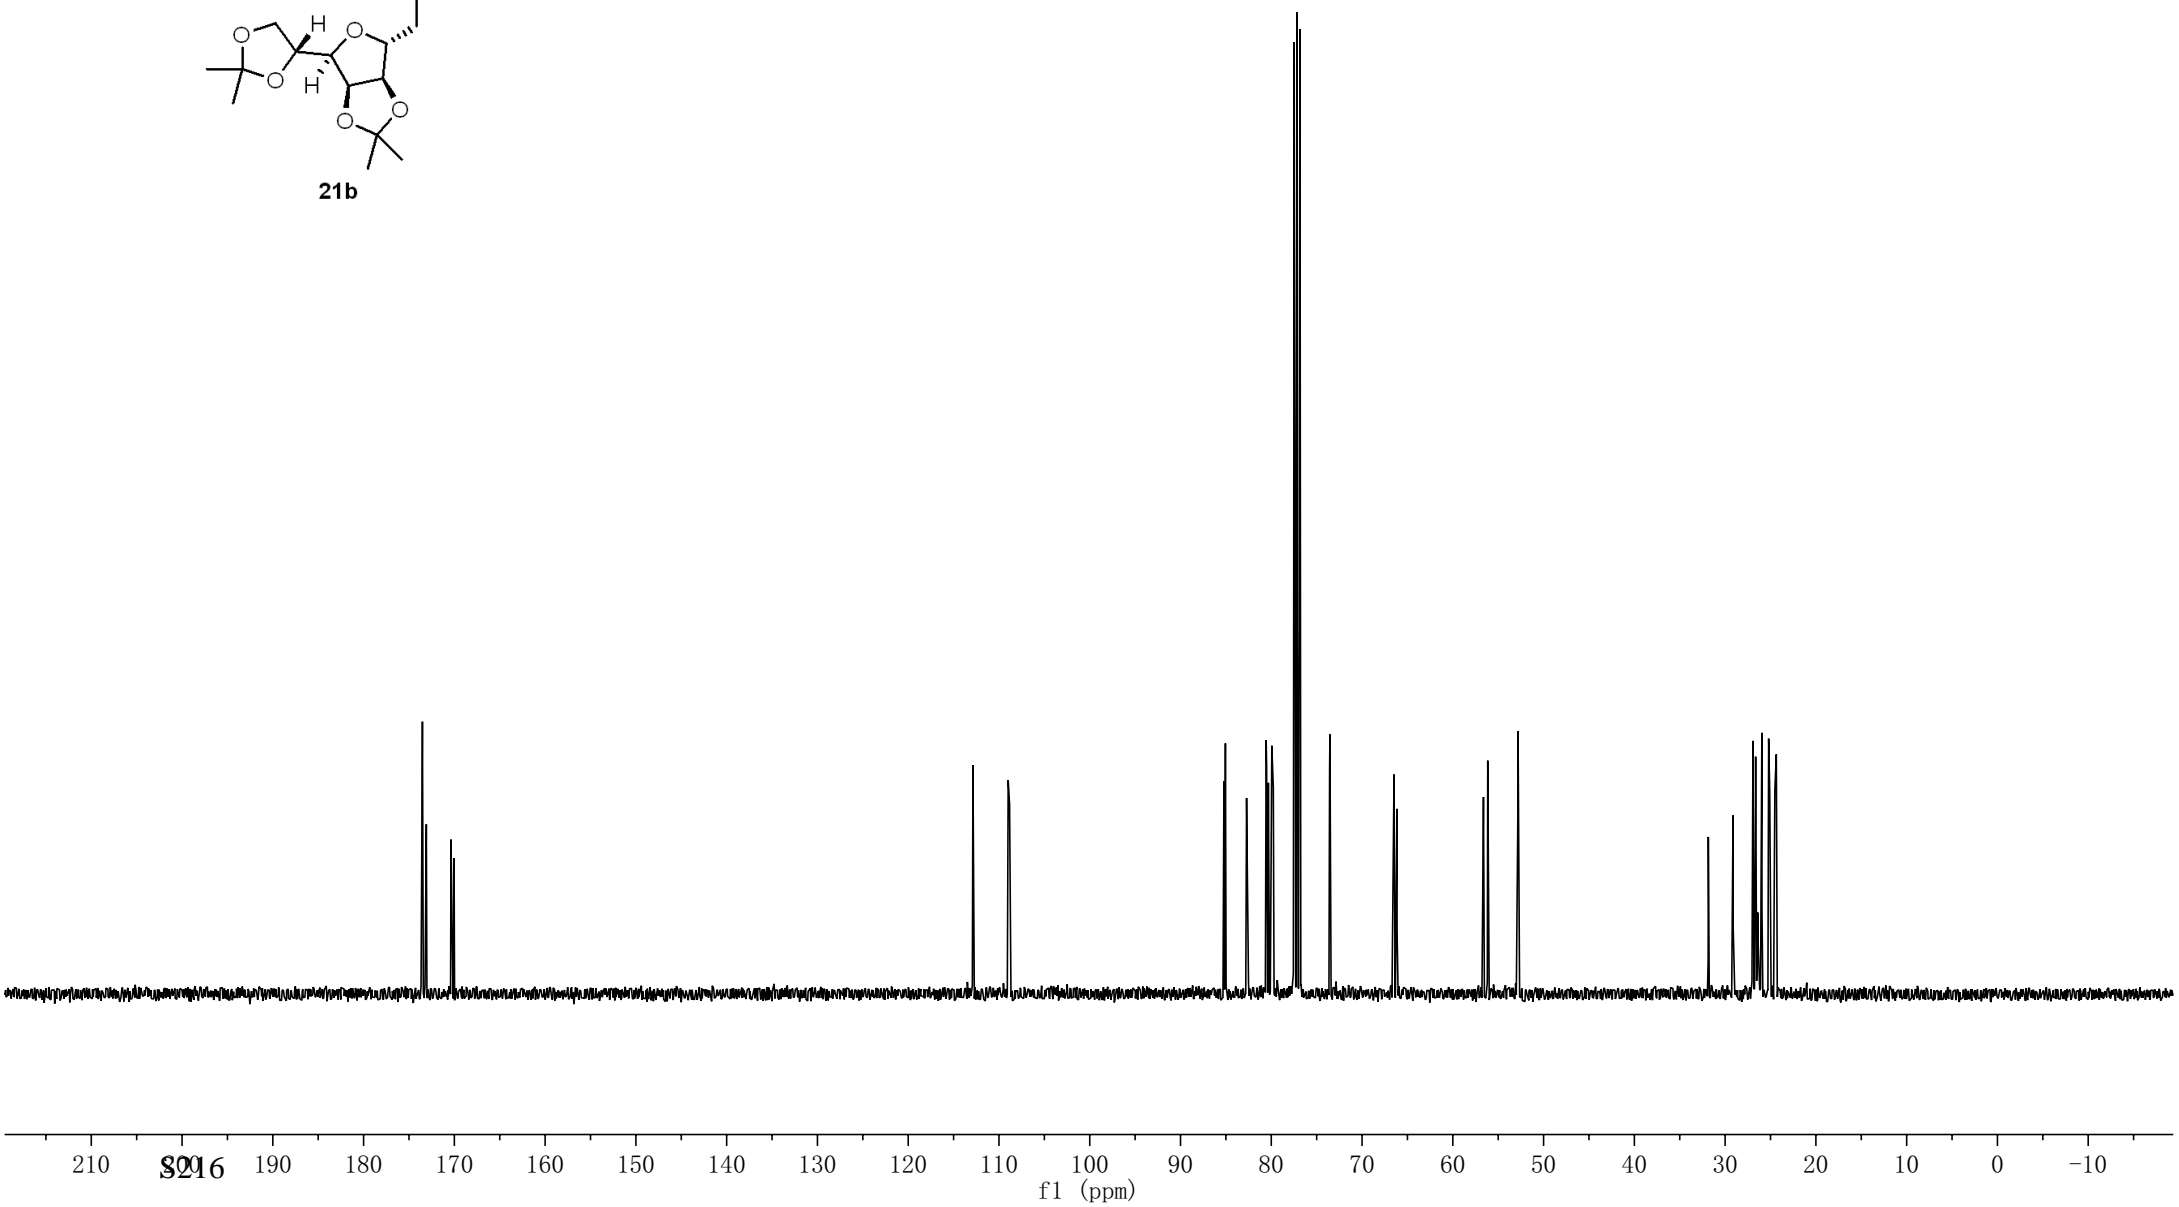



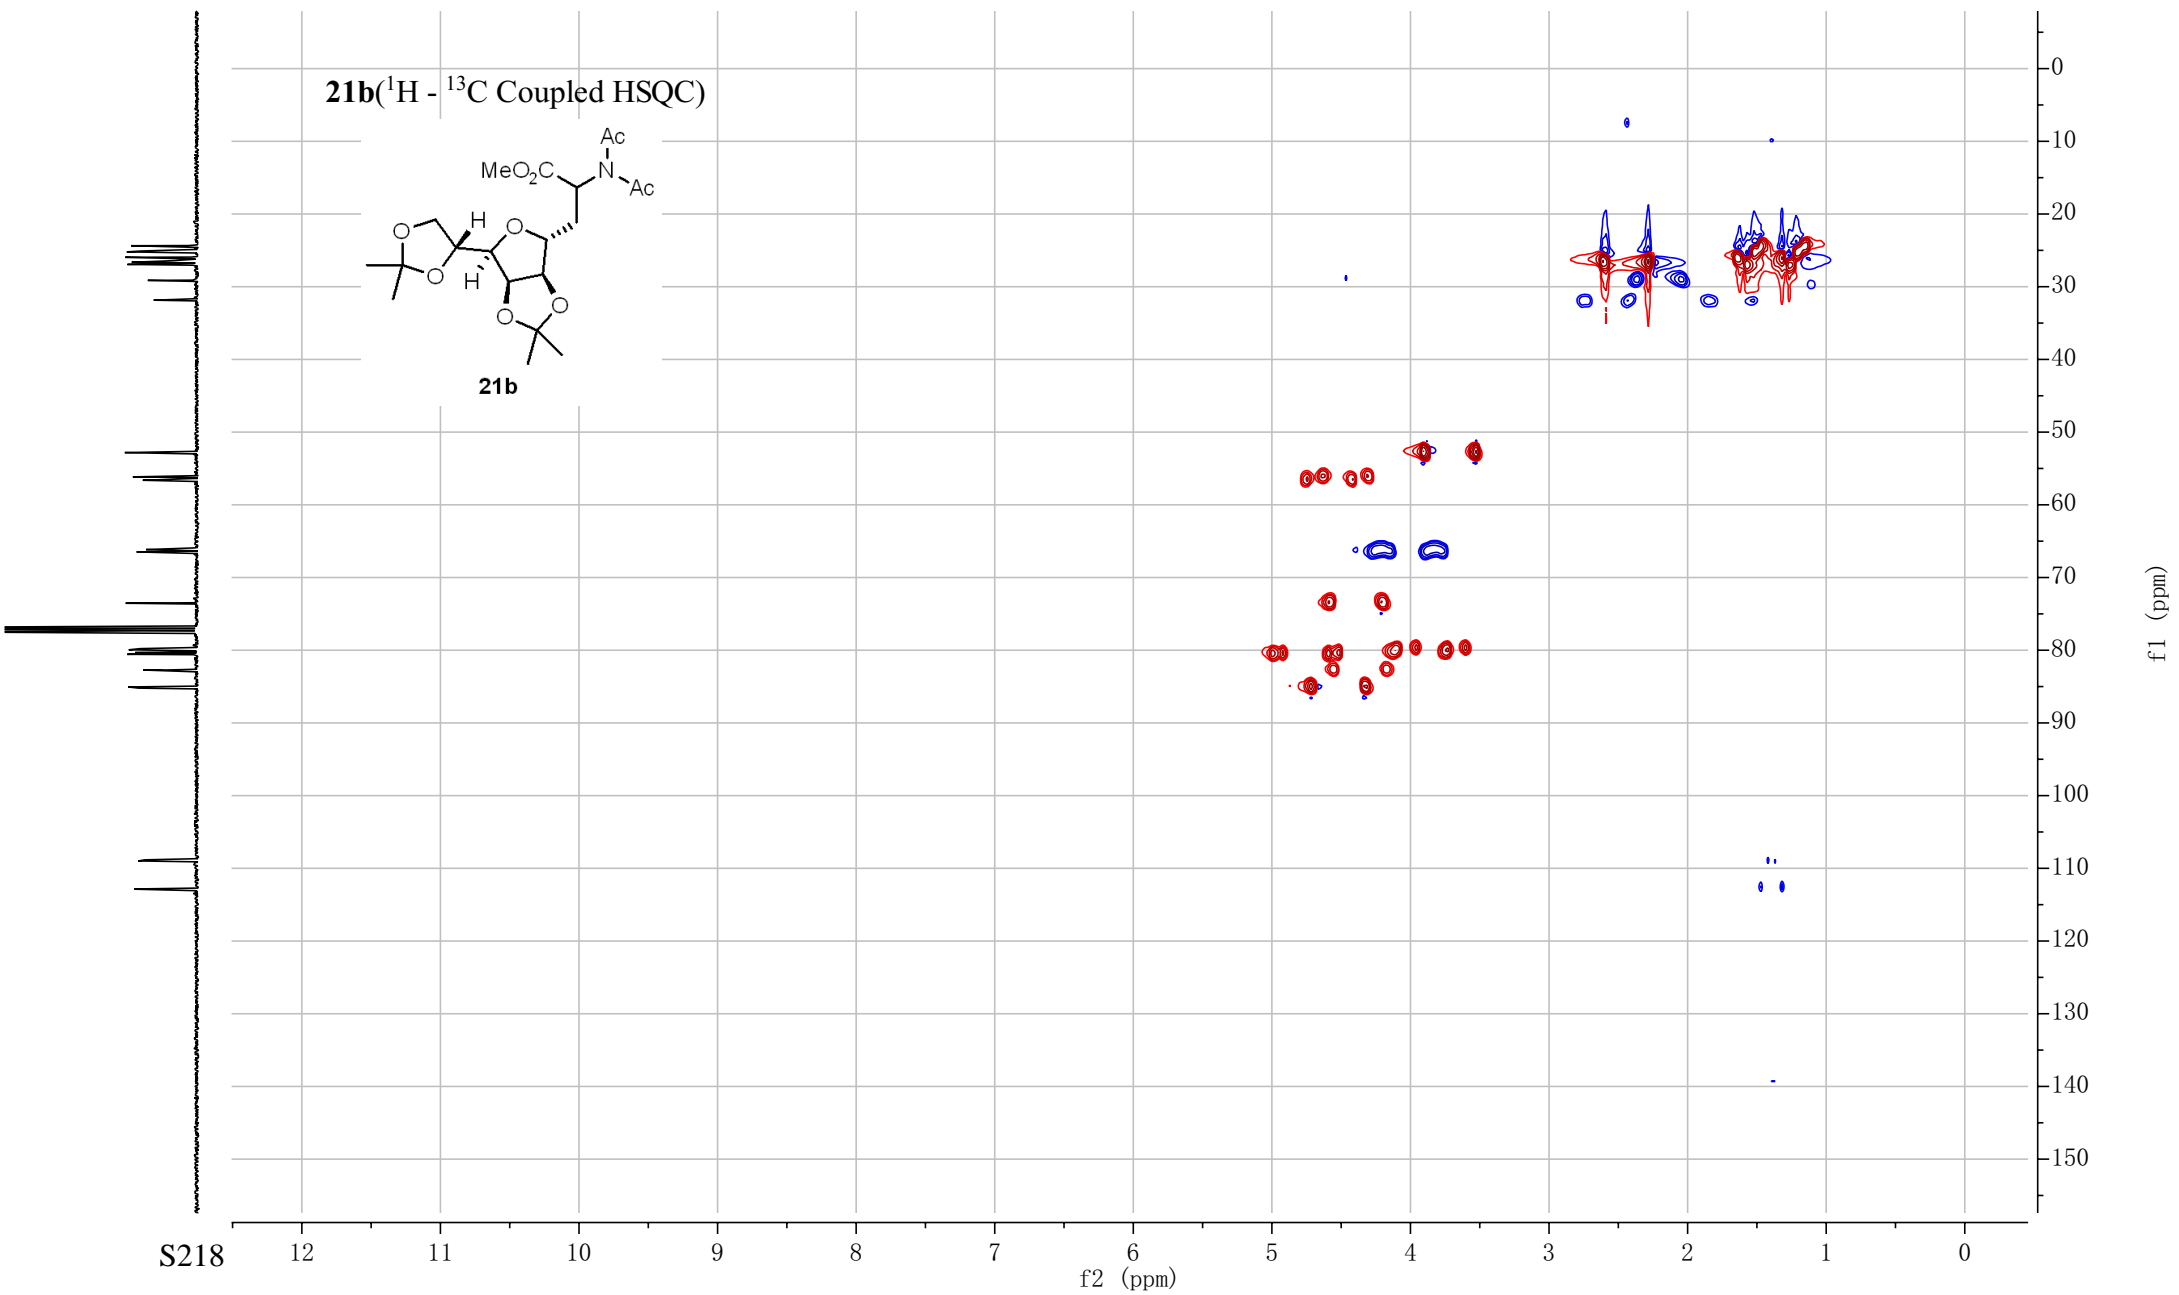

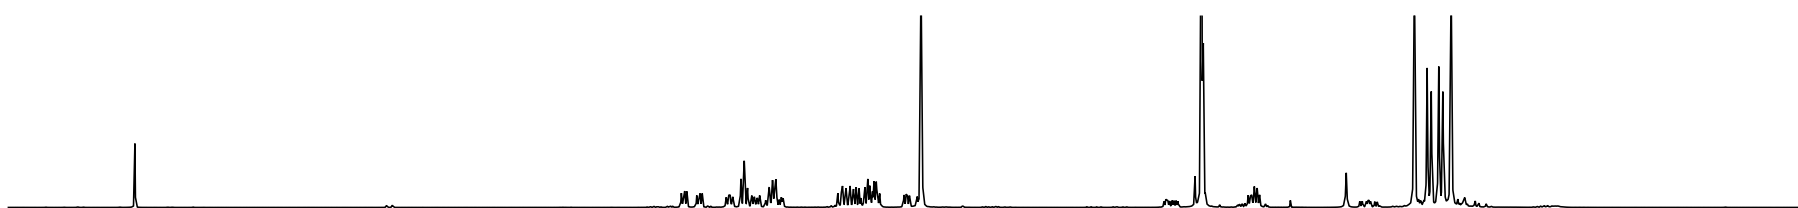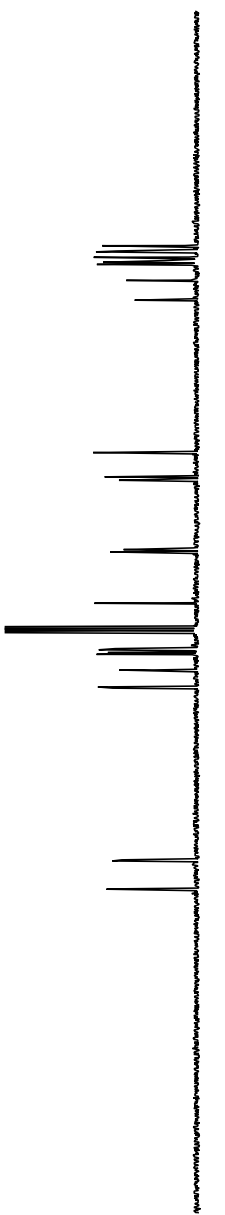

**21b** ( $^1\text{H} - ^{13}\text{C}$  HSQC)

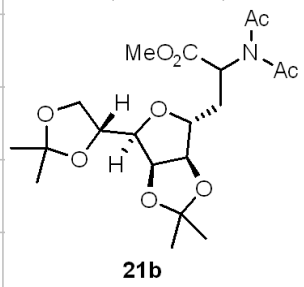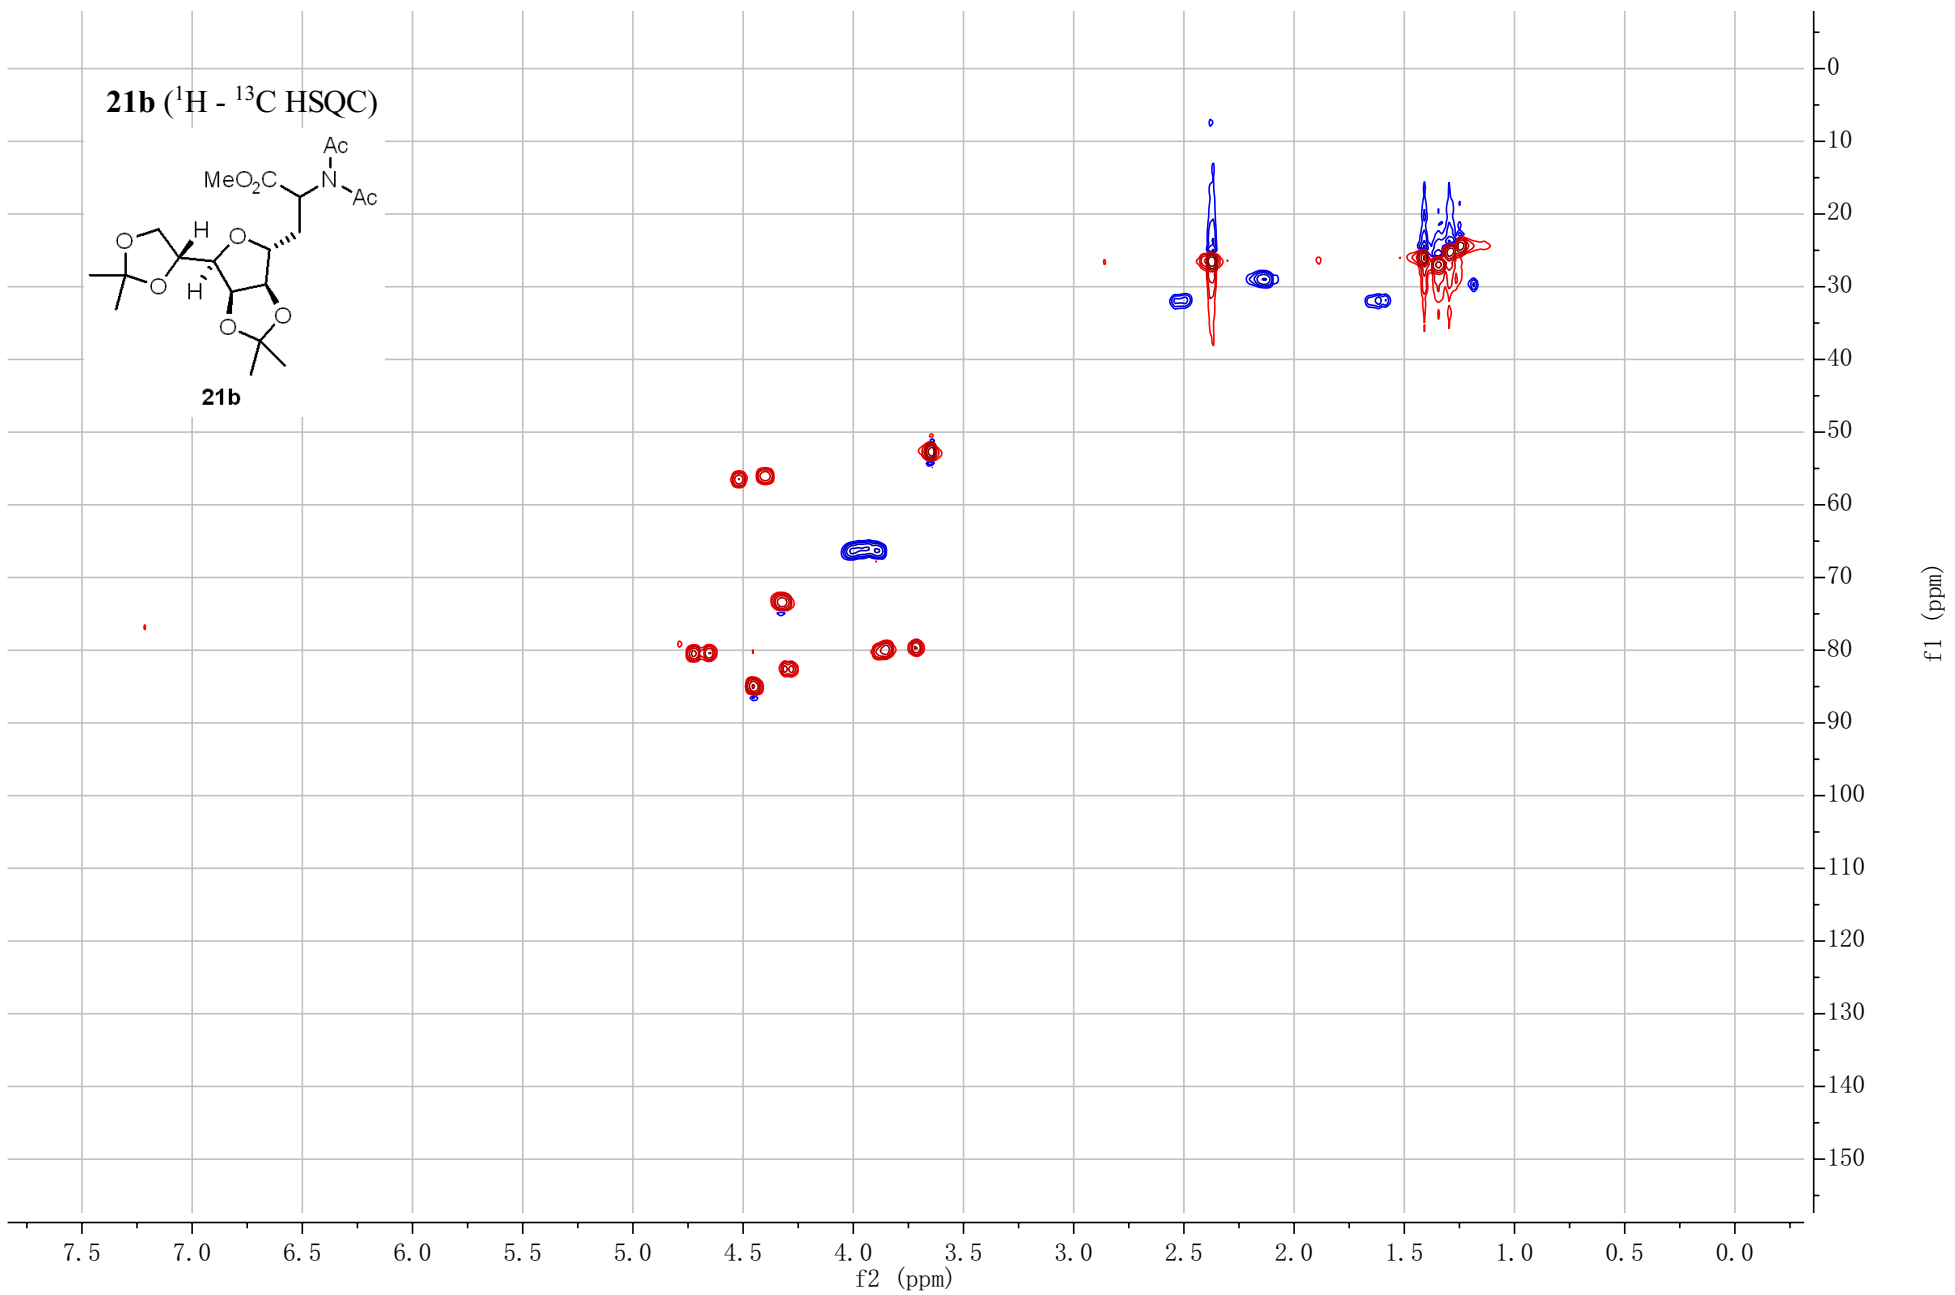

7.88  
7.87  
7.87  
7.86  
7.85  
7.84  
7.75  
7.75  
7.74  
7.74  
7.73  
7.73  
7.26  
5.04  
5.03  
5.02  
5.01  
5.01  
5.00  
5.00  
4.81  
4.81  
4.80  
4.72  
4.71  
4.70  
4.54  
4.54  
4.54  
4.52  
4.52  
4.13  
4.12  
4.12  
4.10  
3.79  
3.78  
3.77  
3.74  
3.74  
3.73  
3.73  
3.69  
3.67  
3.67  
3.65  
3.60  
3.48  
3.46  
3.45  
1.48  
1.44  
1.42  
1.37  
1.31  
1.29  
1.29  
1.27

**21c** (<sup>1</sup>H NMR, 400MHz, CDCl<sub>3</sub>)

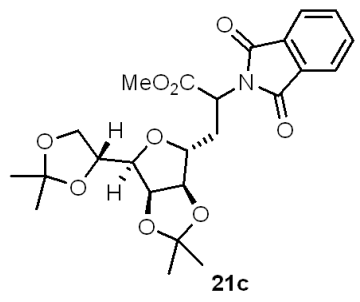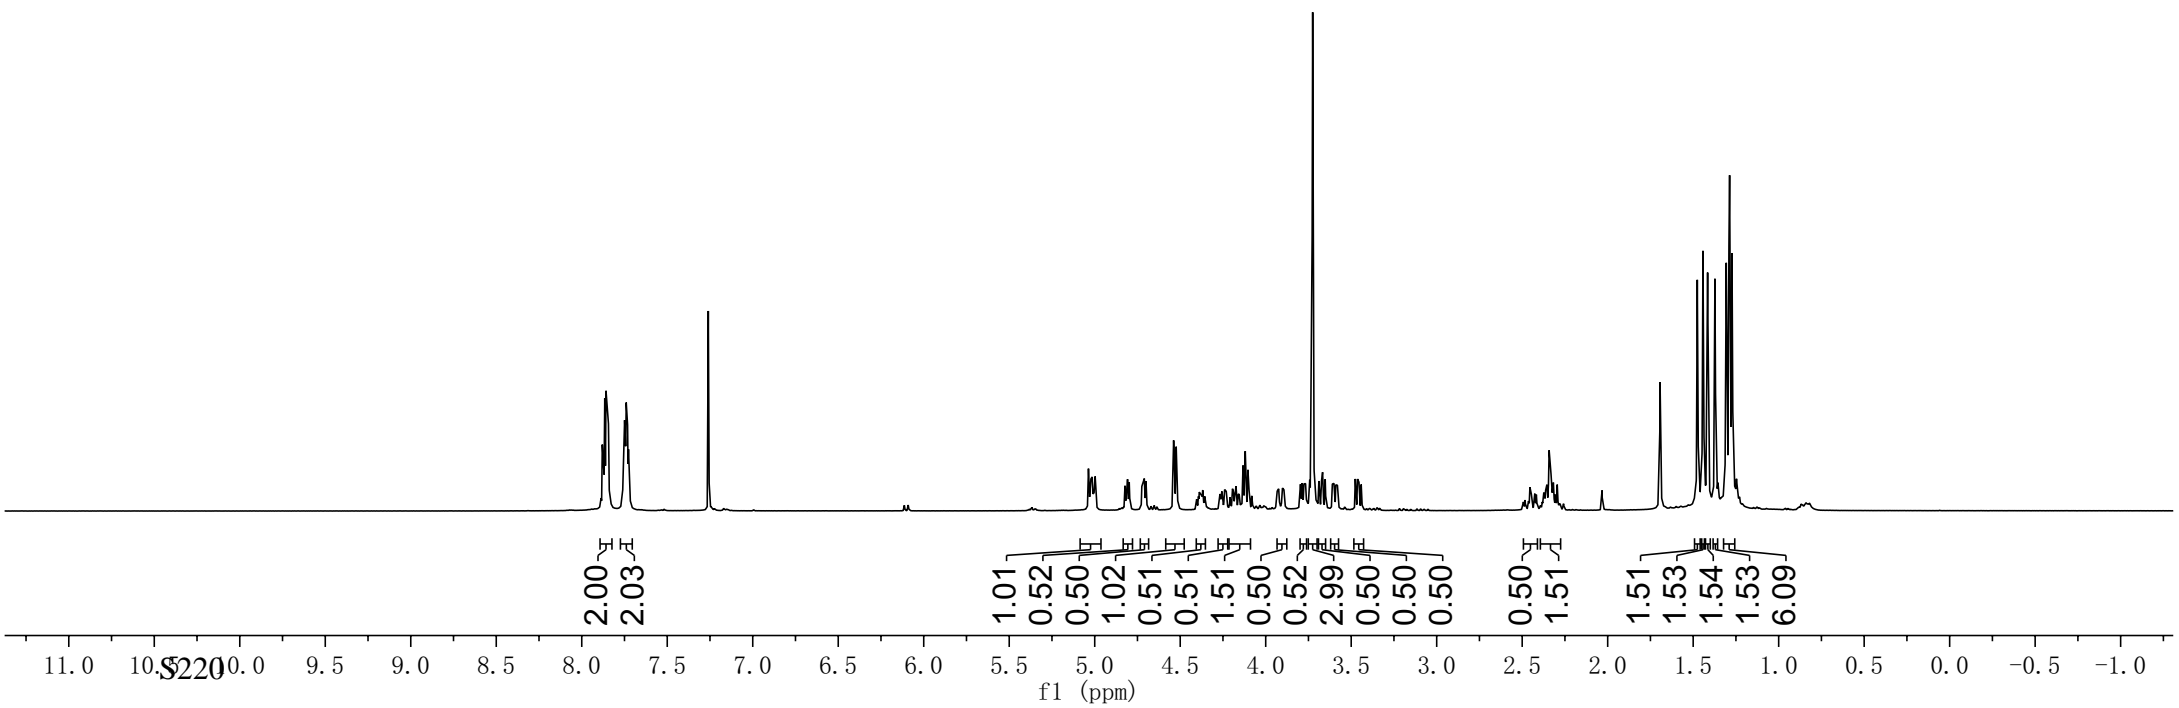

169.90  
169.48  
167.65  
167.61

134.41  
132.09  
131.99  
123.79  
112.98  
112.87  
109.50  
109.25  
85.93  
85.32  
83.03  
80.70  
80.68  
80.61  
80.32  
80.21  
73.37  
73.10  
67.25  
66.98  
53.12  
49.95  
48.88  
29.80  
28.85  
27.22  
26.85  
26.26  
26.06  
25.49  
25.35  
24.83  
24.50

**21c** ( $^{13}\text{C}$  NMR, 101MHz,  $\text{CDCl}_3$ )

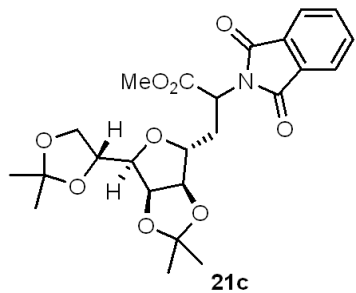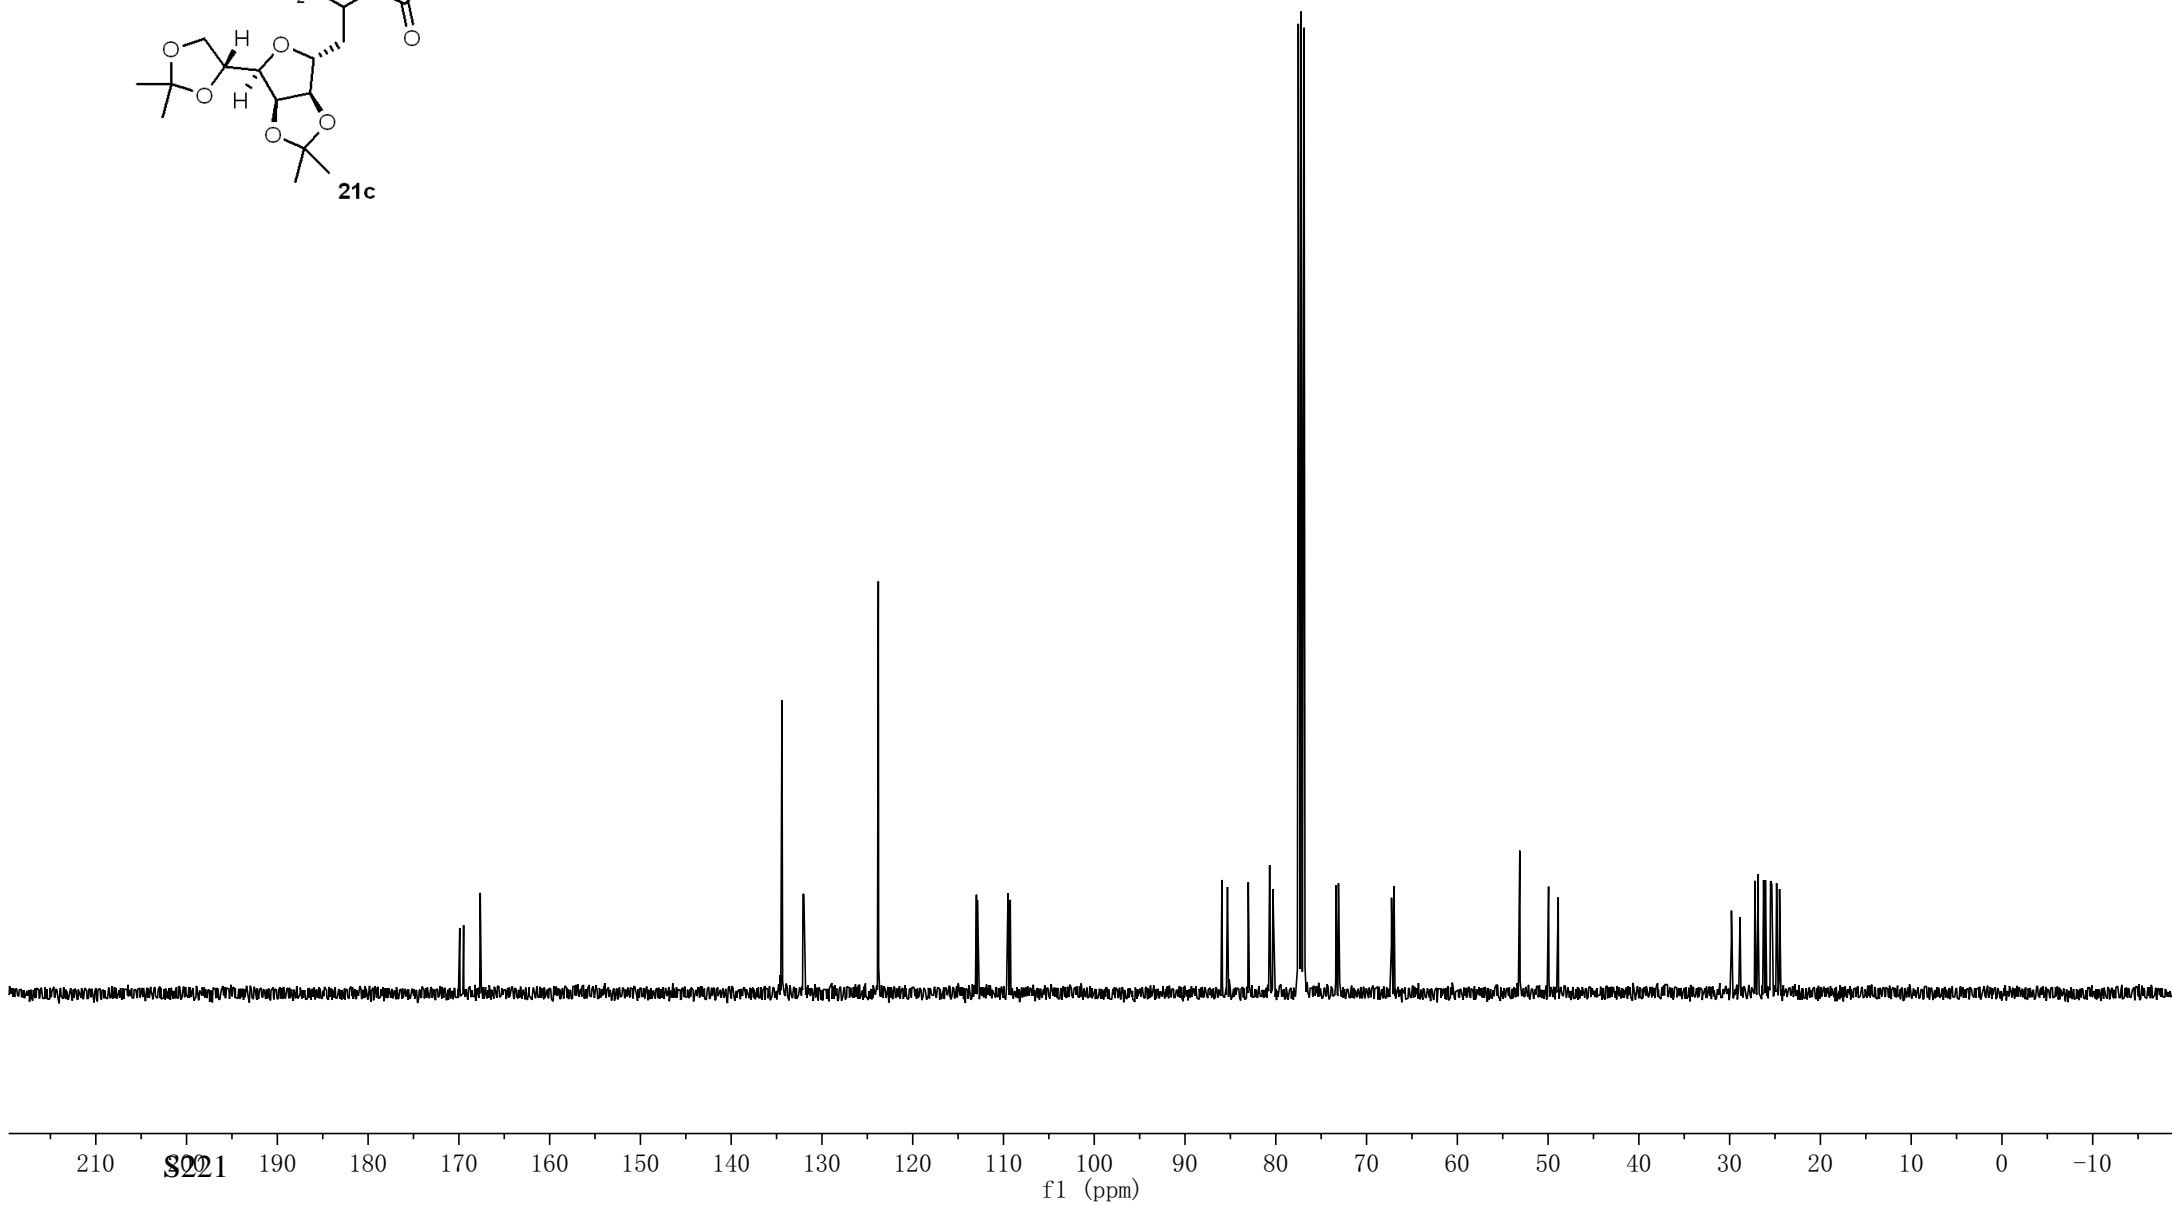



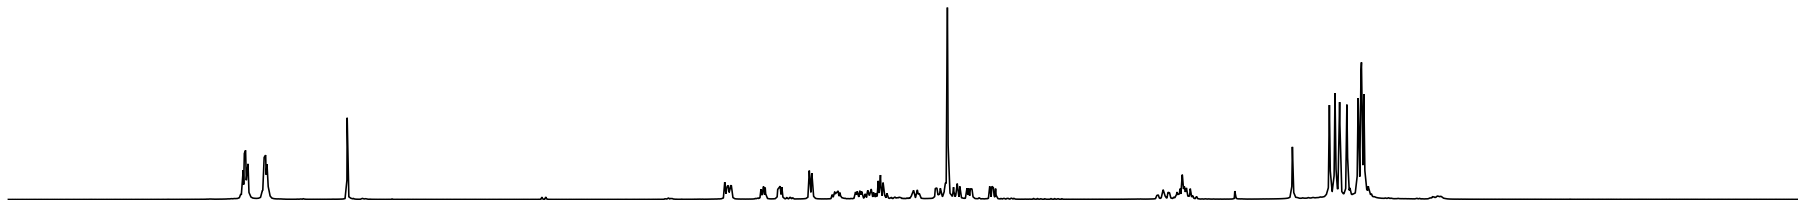

**21c** ( $^1\text{H} - ^1\text{H}$  COSY)

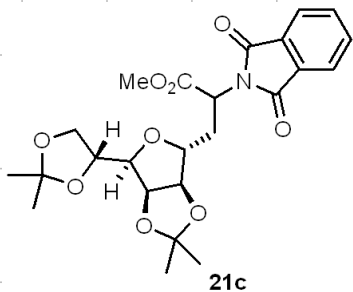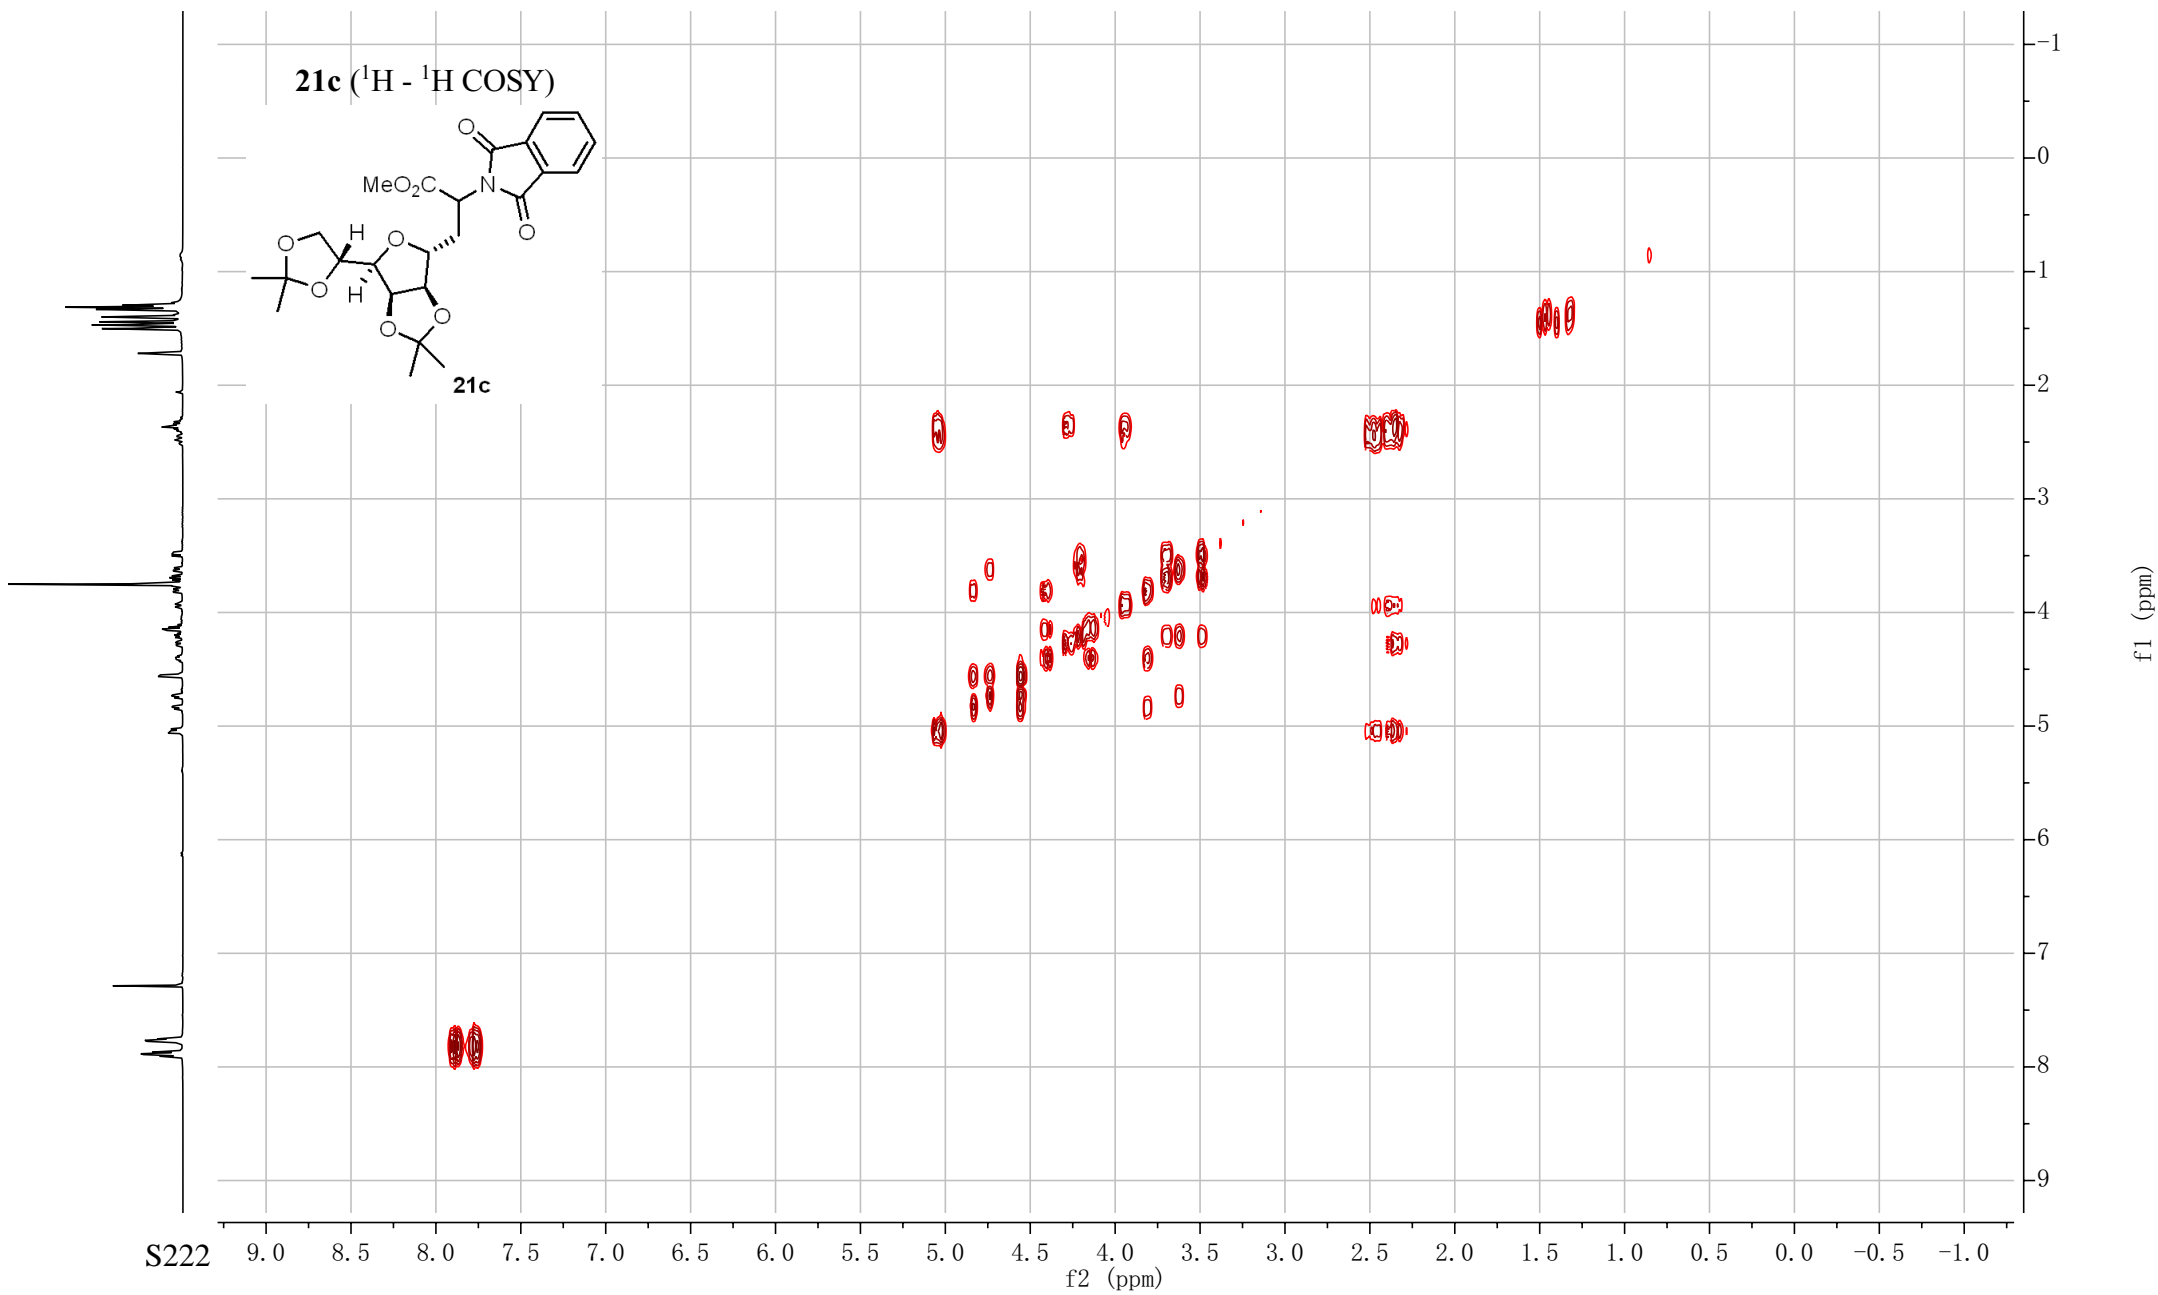

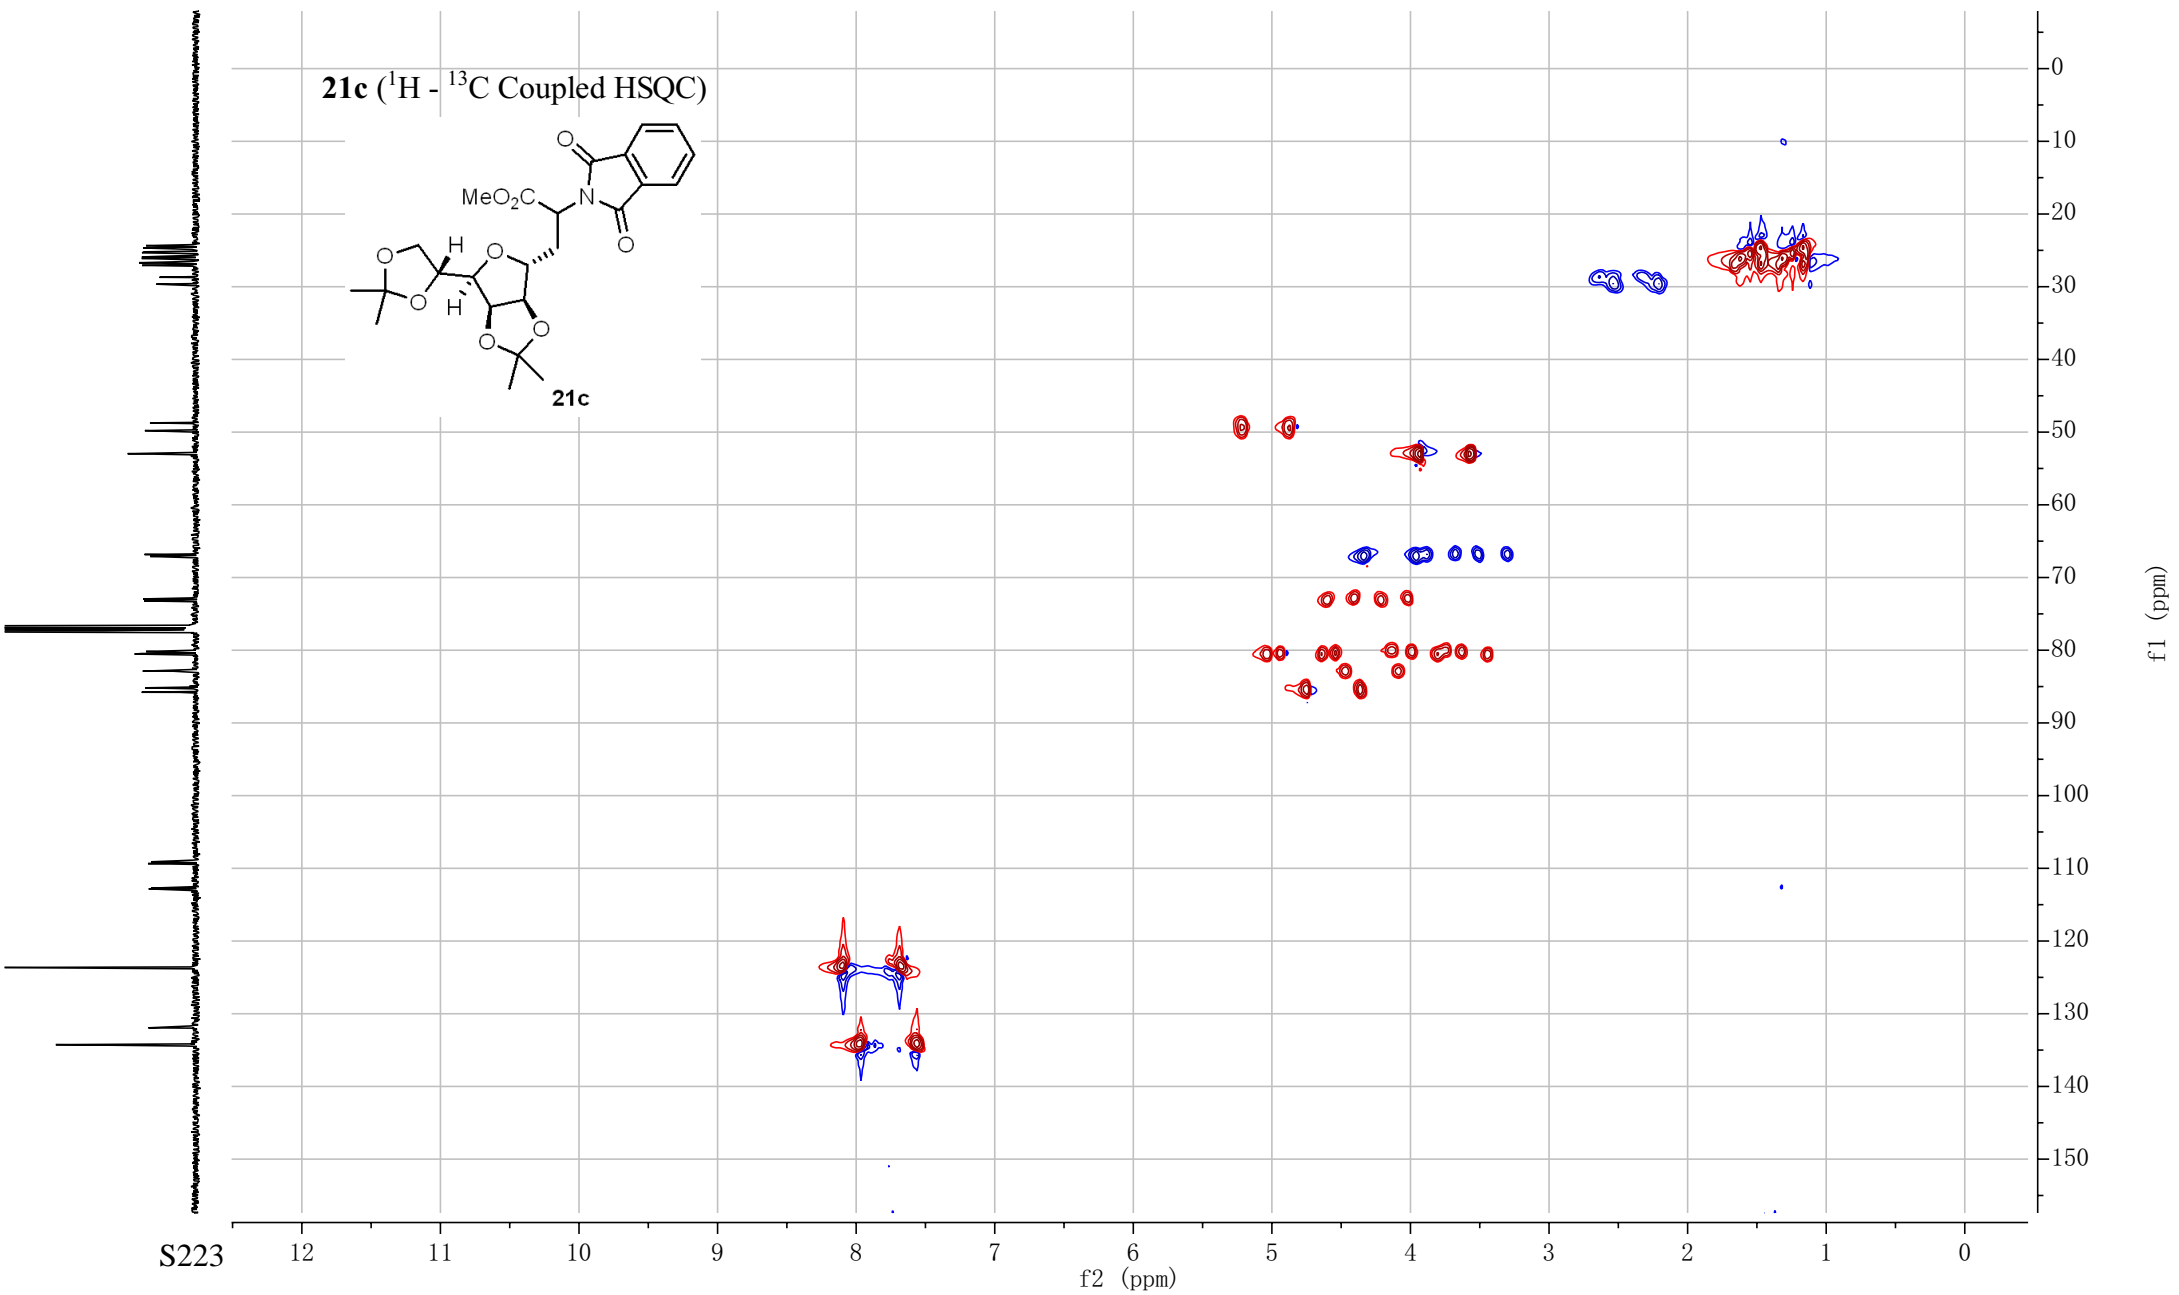

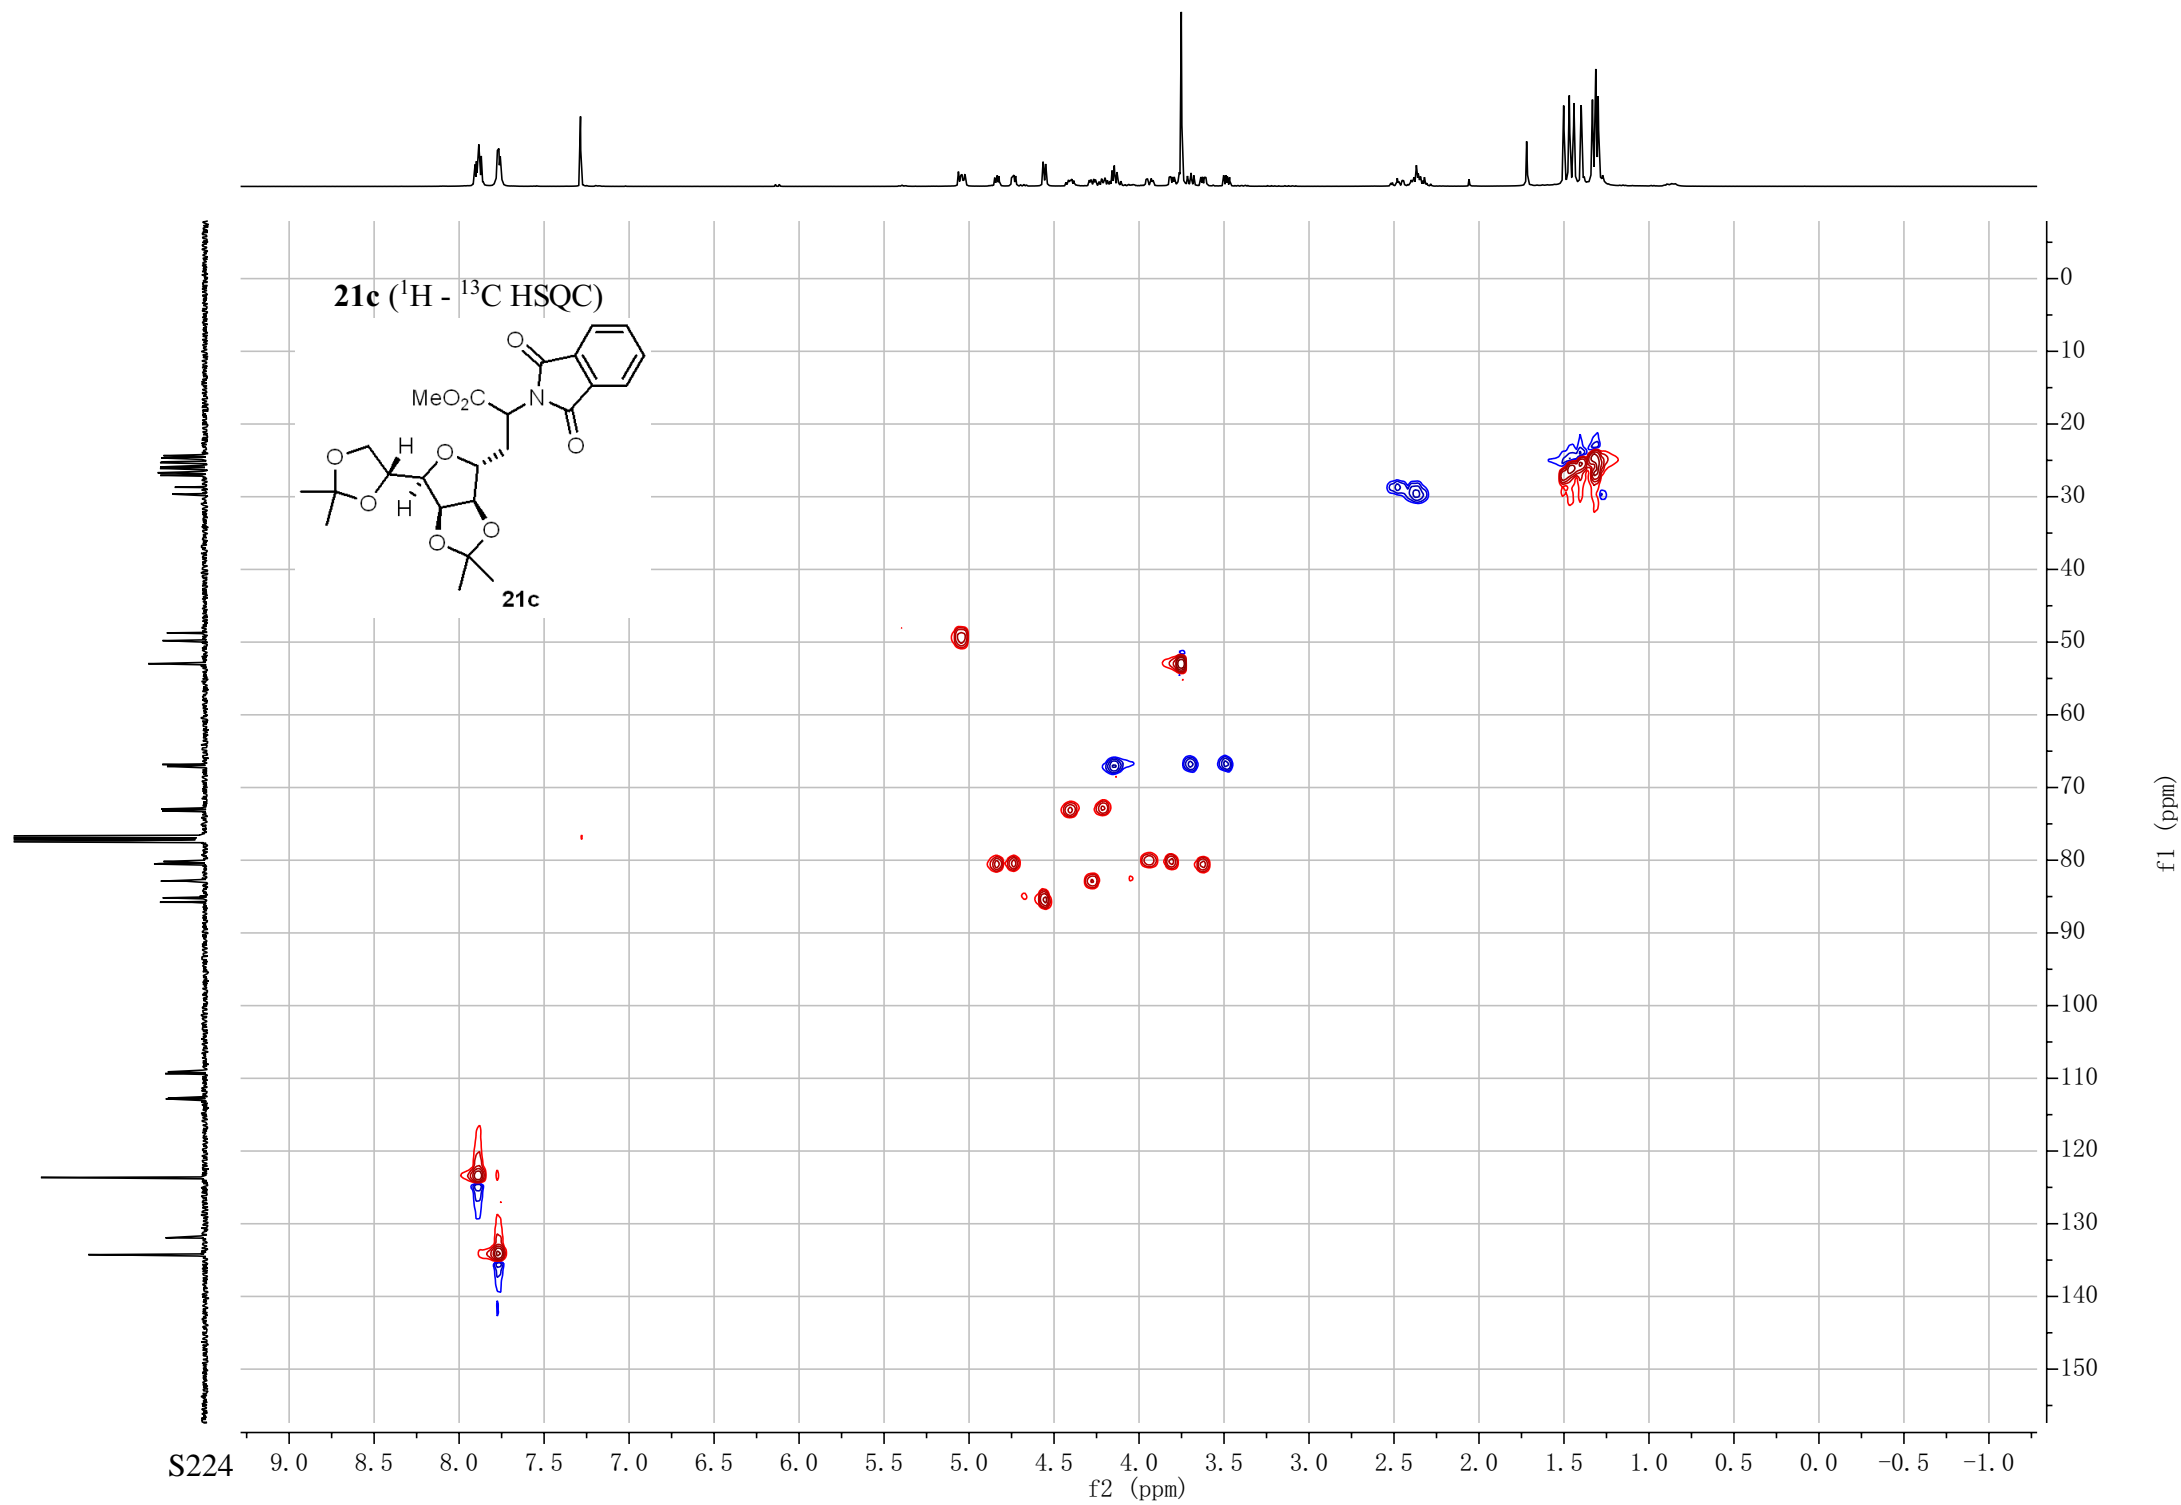

7.26  
4.80  
4.79  
4.78  
4.77  
4.76  
4.56  
4.55  
4.54  
4.54  
4.40  
4.39  
4.38  
4.37  
4.37  
4.35  
4.18  
4.17  
4.16  
4.14  
4.10  
4.09  
4.08  
4.06  
4.05  
4.05  
4.03  
4.03  
4.01  
4.00  
3.99  
3.77  
3.76  
3.75  
3.75  
3.74  
3.74  
3.72  
3.71  
2.90  
2.89  
2.85  
2.83  
2.15  
2.13  
2.11  
2.11  
2.09  
2.08  
2.07  
1.49  
1.47  
1.45  
1.44  
1.43  
1.43  
1.41  
1.36  
1.32

**21d** ( $^1\text{H}$  NMR, 400MHz,  $\text{CDCl}_3$ )

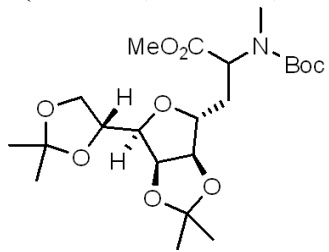

**21d**

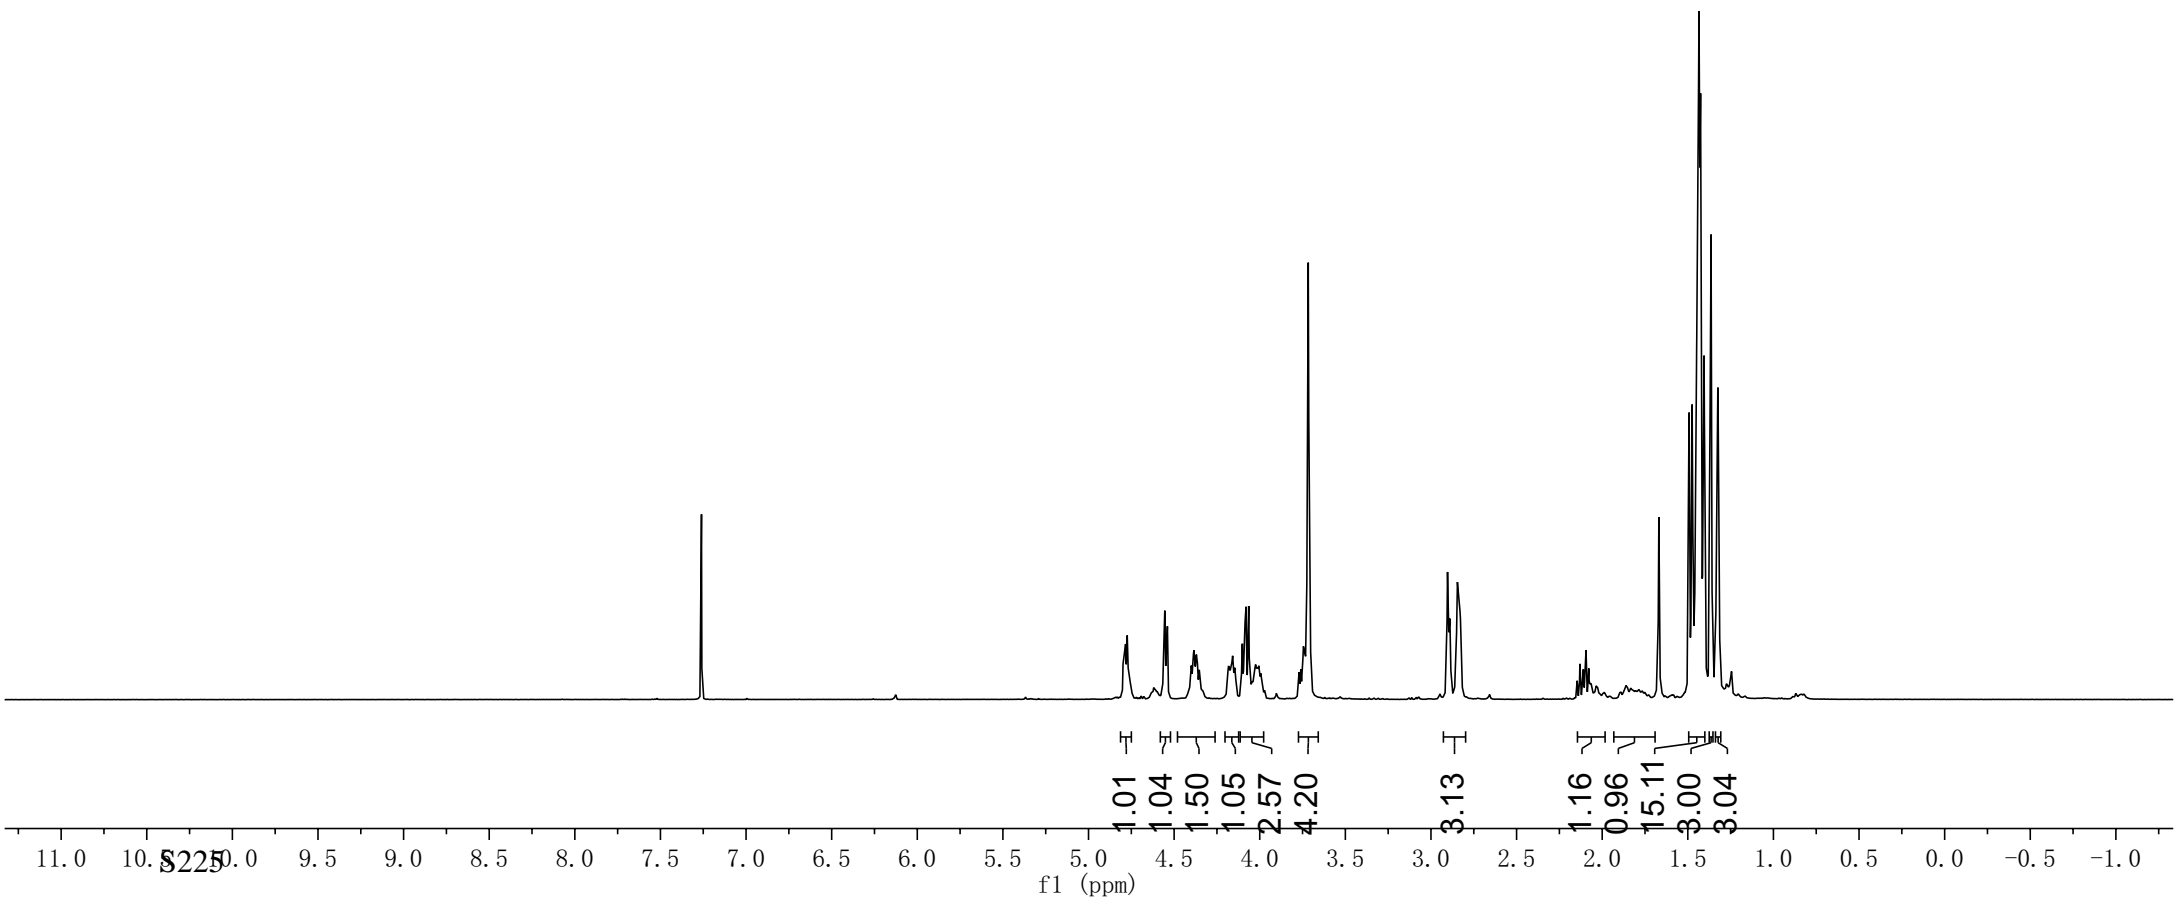

**21d** ( $^{13}\text{C}$  NMR, 101MHz,  $\text{CDCl}_3$ )

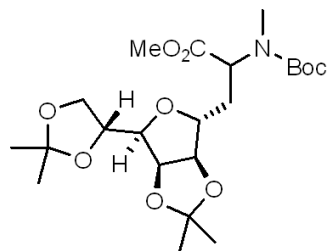

**21d**

141.01  
140.86  
140.10  
138.85  
138.36  
138.23  
128.89  
128.69  
128.60  
128.57  
128.26  
128.14  
128.08  
127.79  
127.39  
127.11  
126.83  
126.37  
98.24  
82.48  
80.01  
77.84  
77.48  
77.16  
76.84  
75.95  
75.33  
73.60  
73.57  
70.73  
54.98

—29.83

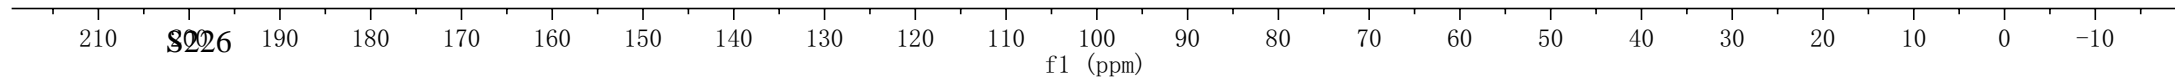

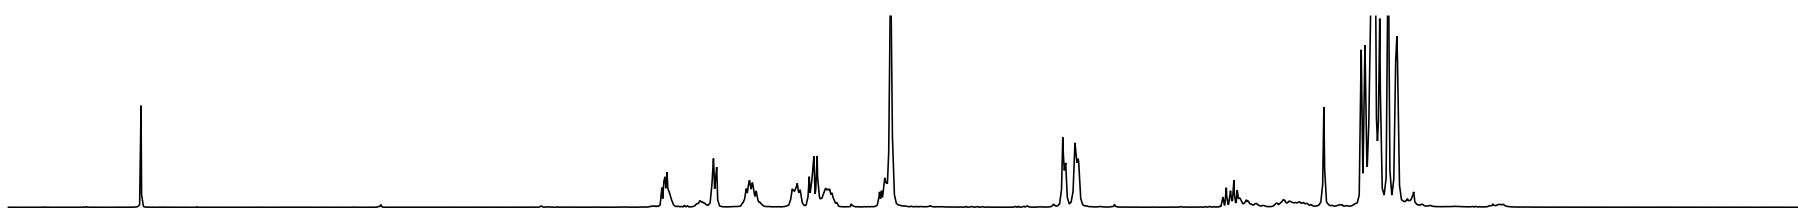

**21d** ( $^1\text{H} - ^1\text{H}$  COSY)

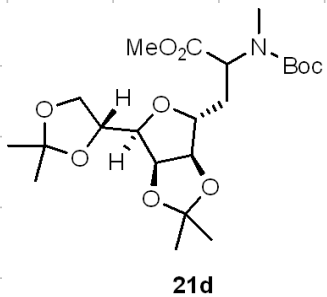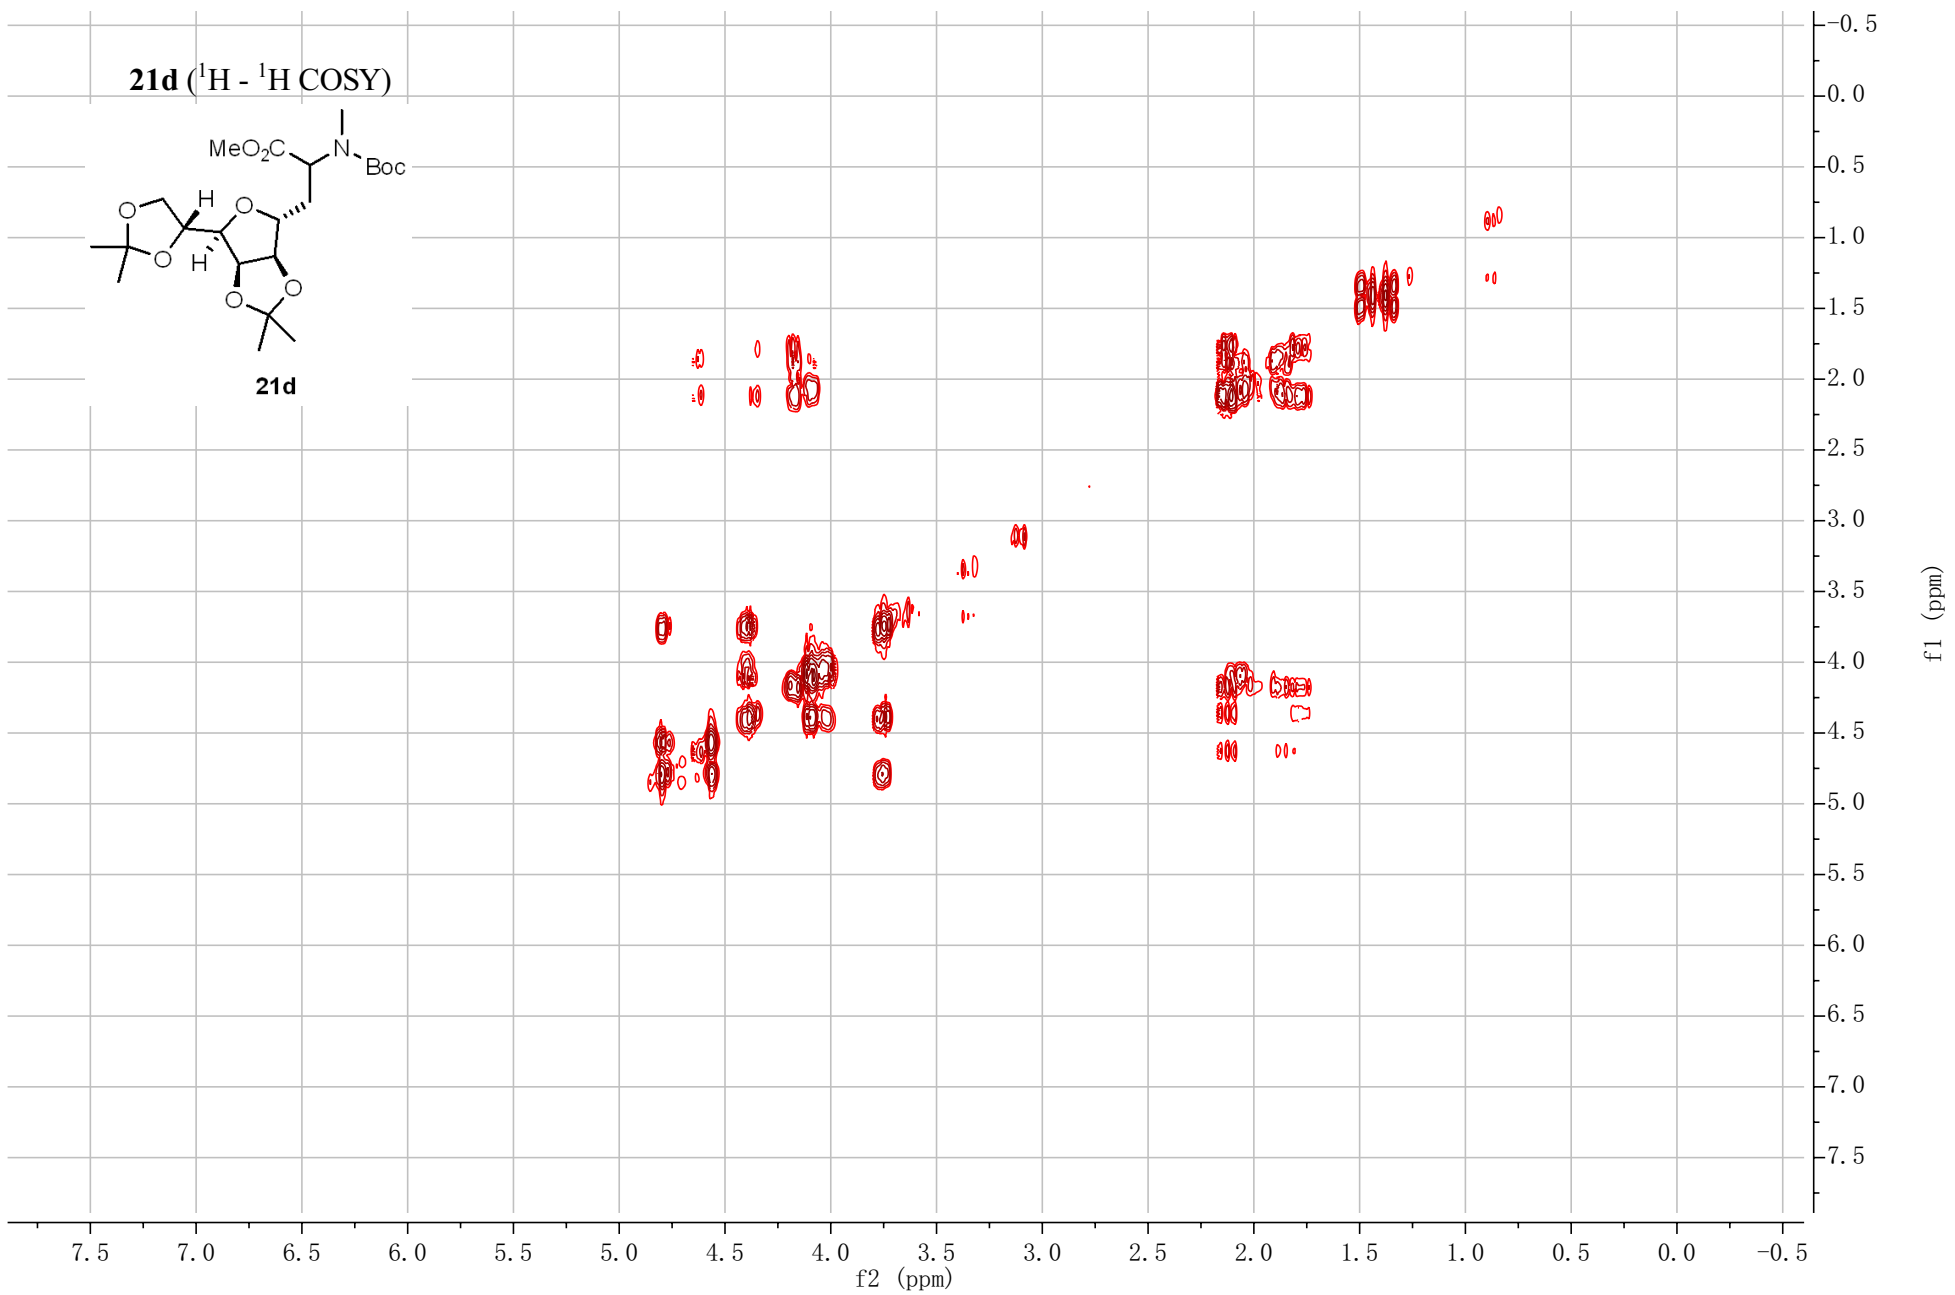

S227



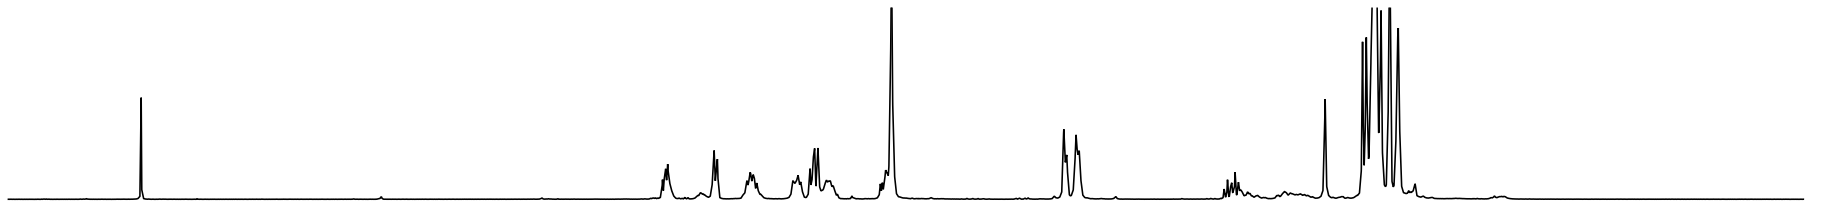

**21d** ( $^1\text{H} - ^{13}\text{C}$  HSQC)

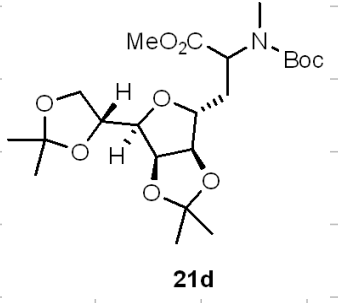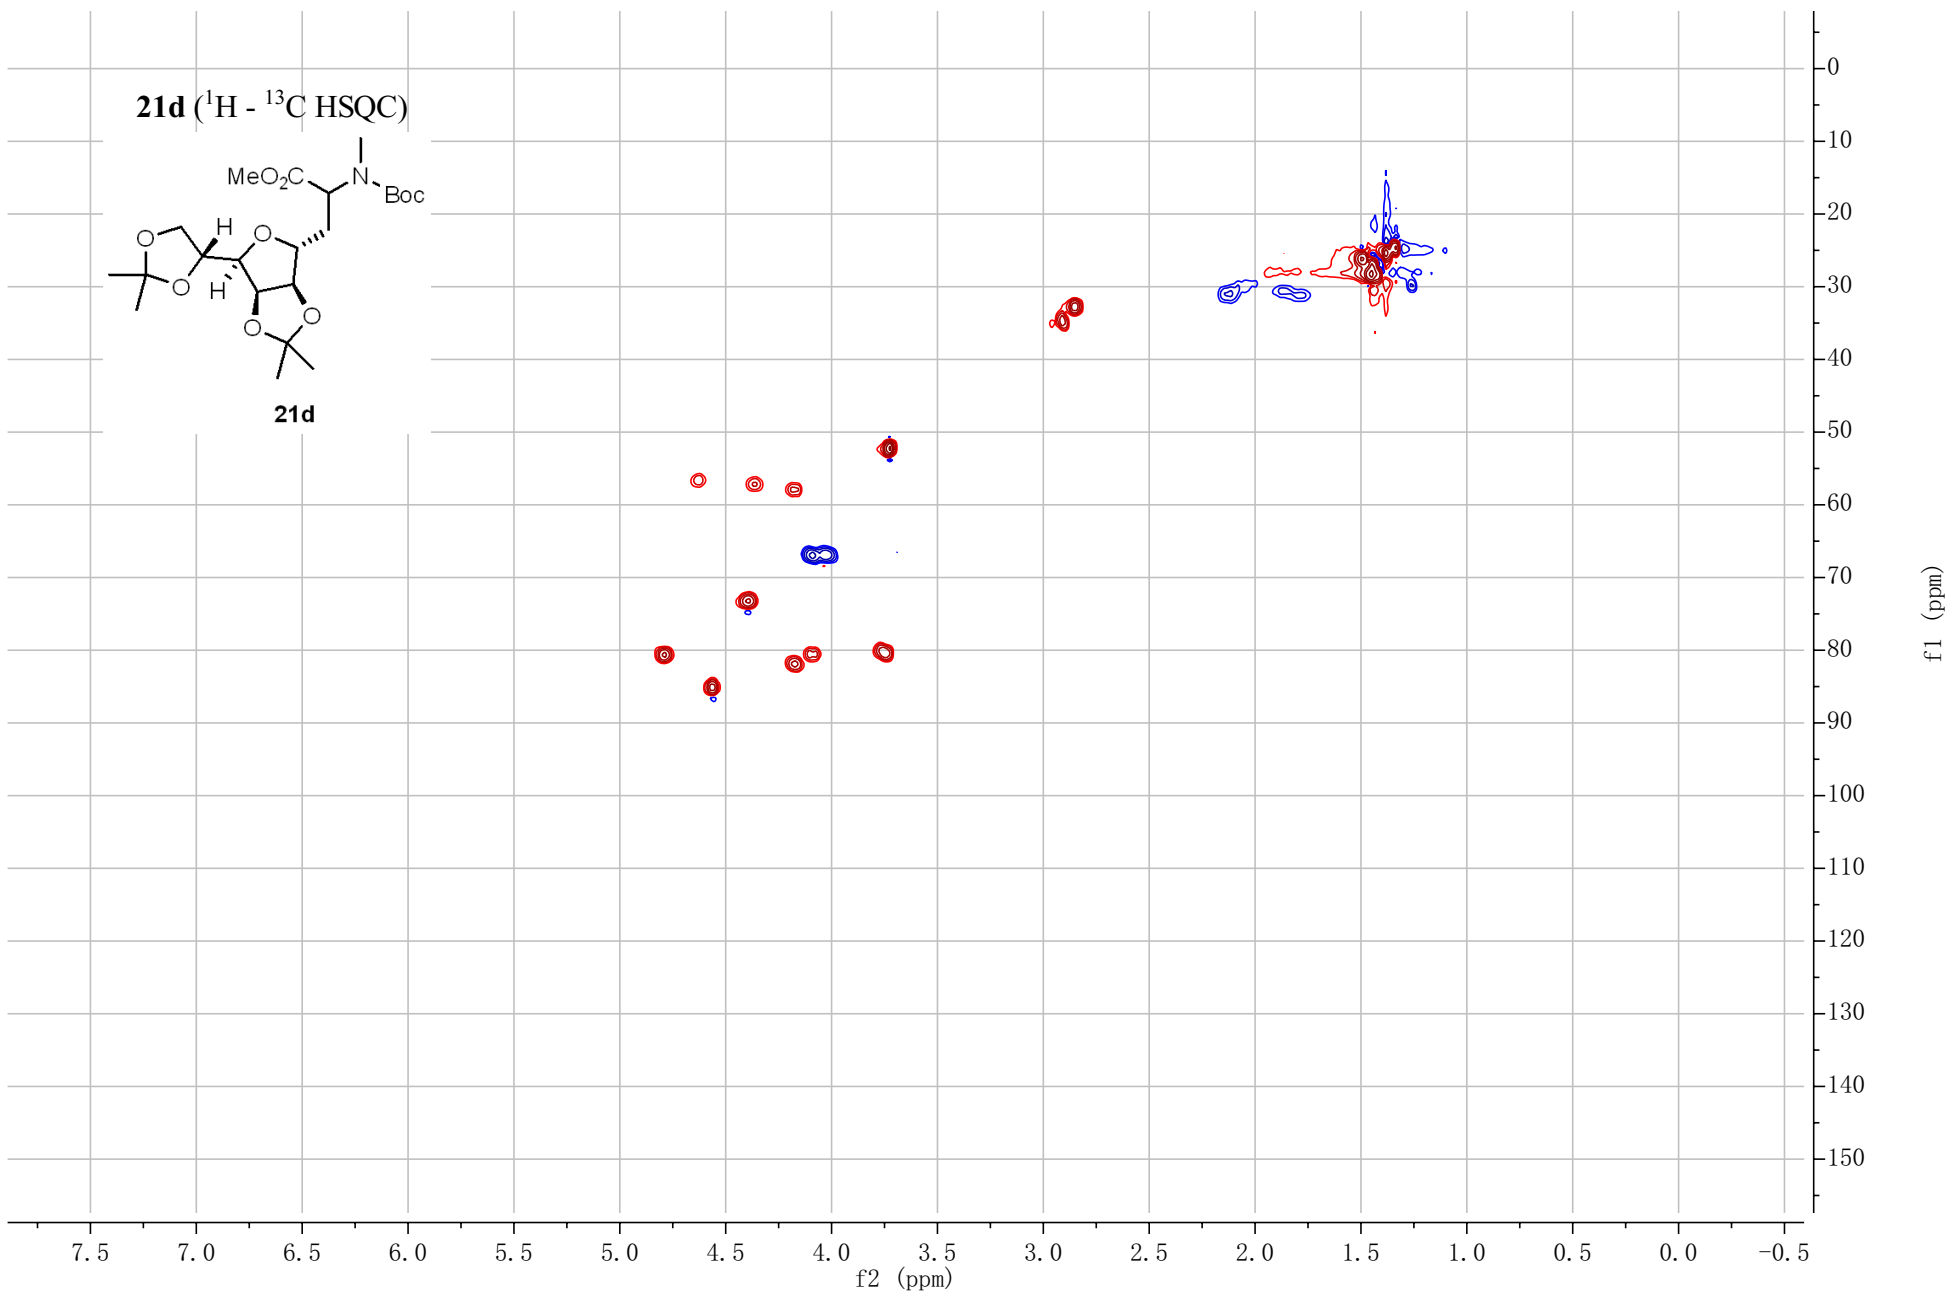

S229

f2 (ppm)

f1 (ppm)



7.28  
7.28  
7.27  
7.26  
7.24  
7.23  
7.22  
7.22  
7.21  
7.21  
7.20  
7.20  
7.19  
7.18  
7.17  
7.16  
5.00  
5.00  
4.74  
4.73  
4.72  
4.71  
4.43  
4.43  
4.41  
4.41  
4.36  
4.35  
4.34  
4.34  
4.33  
4.32  
4.25  
3.97  
3.95  
3.93  
3.93  
3.92  
3.91  
3.91  
3.78  
3.76  
3.52  
3.51  
3.50  
3.49  
3.48  
3.46  
3.45  
1.54  
1.52  
1.48  
1.47  
1.41  
1.40  
1.35  
1.35  
1.32  
1.30

**21e** ( $^1\text{H}$  NMR, 400MHz,  $\text{CDCl}_3$ )

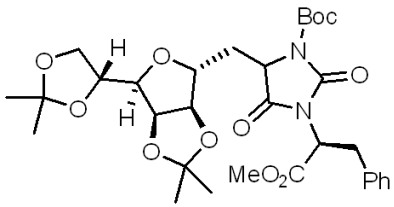

**21e**

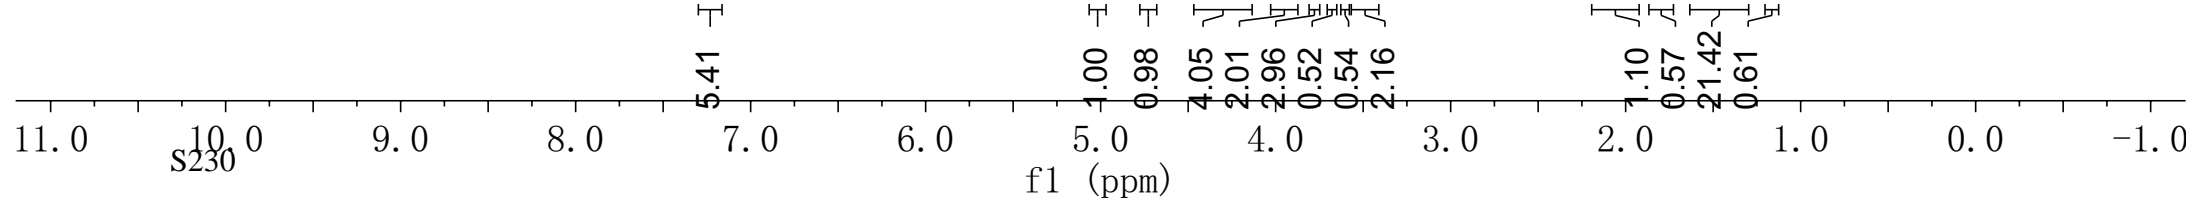

169.97  
169.94  
168.57  
168.54  
151.07  
151.00  
148.73  
148.35

129.22  
128.91  
128.78  
127.12  
127.09  
112.88  
112.86  
109.35  
109.20

85.47  
85.29  
84.97  
84.86  
80.75  
80.65  
80.60  
80.56  
80.49  
79.59  
77.16  
73.22  
73.13  
67.29  
66.82  
57.20  
56.40  
53.98  
53.52  
53.15  
53.06  
33.86  
28.19  
28.07  
27.04  
26.93  
26.24  
25.37  
25.20  
24.88  
24.68

**21e** (<sup>13</sup>C NMR, 101MHz, CDCl<sub>3</sub>)

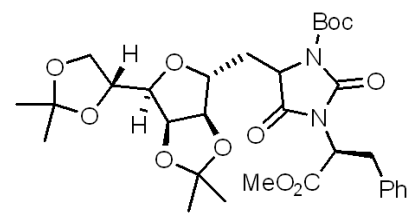

**21e**

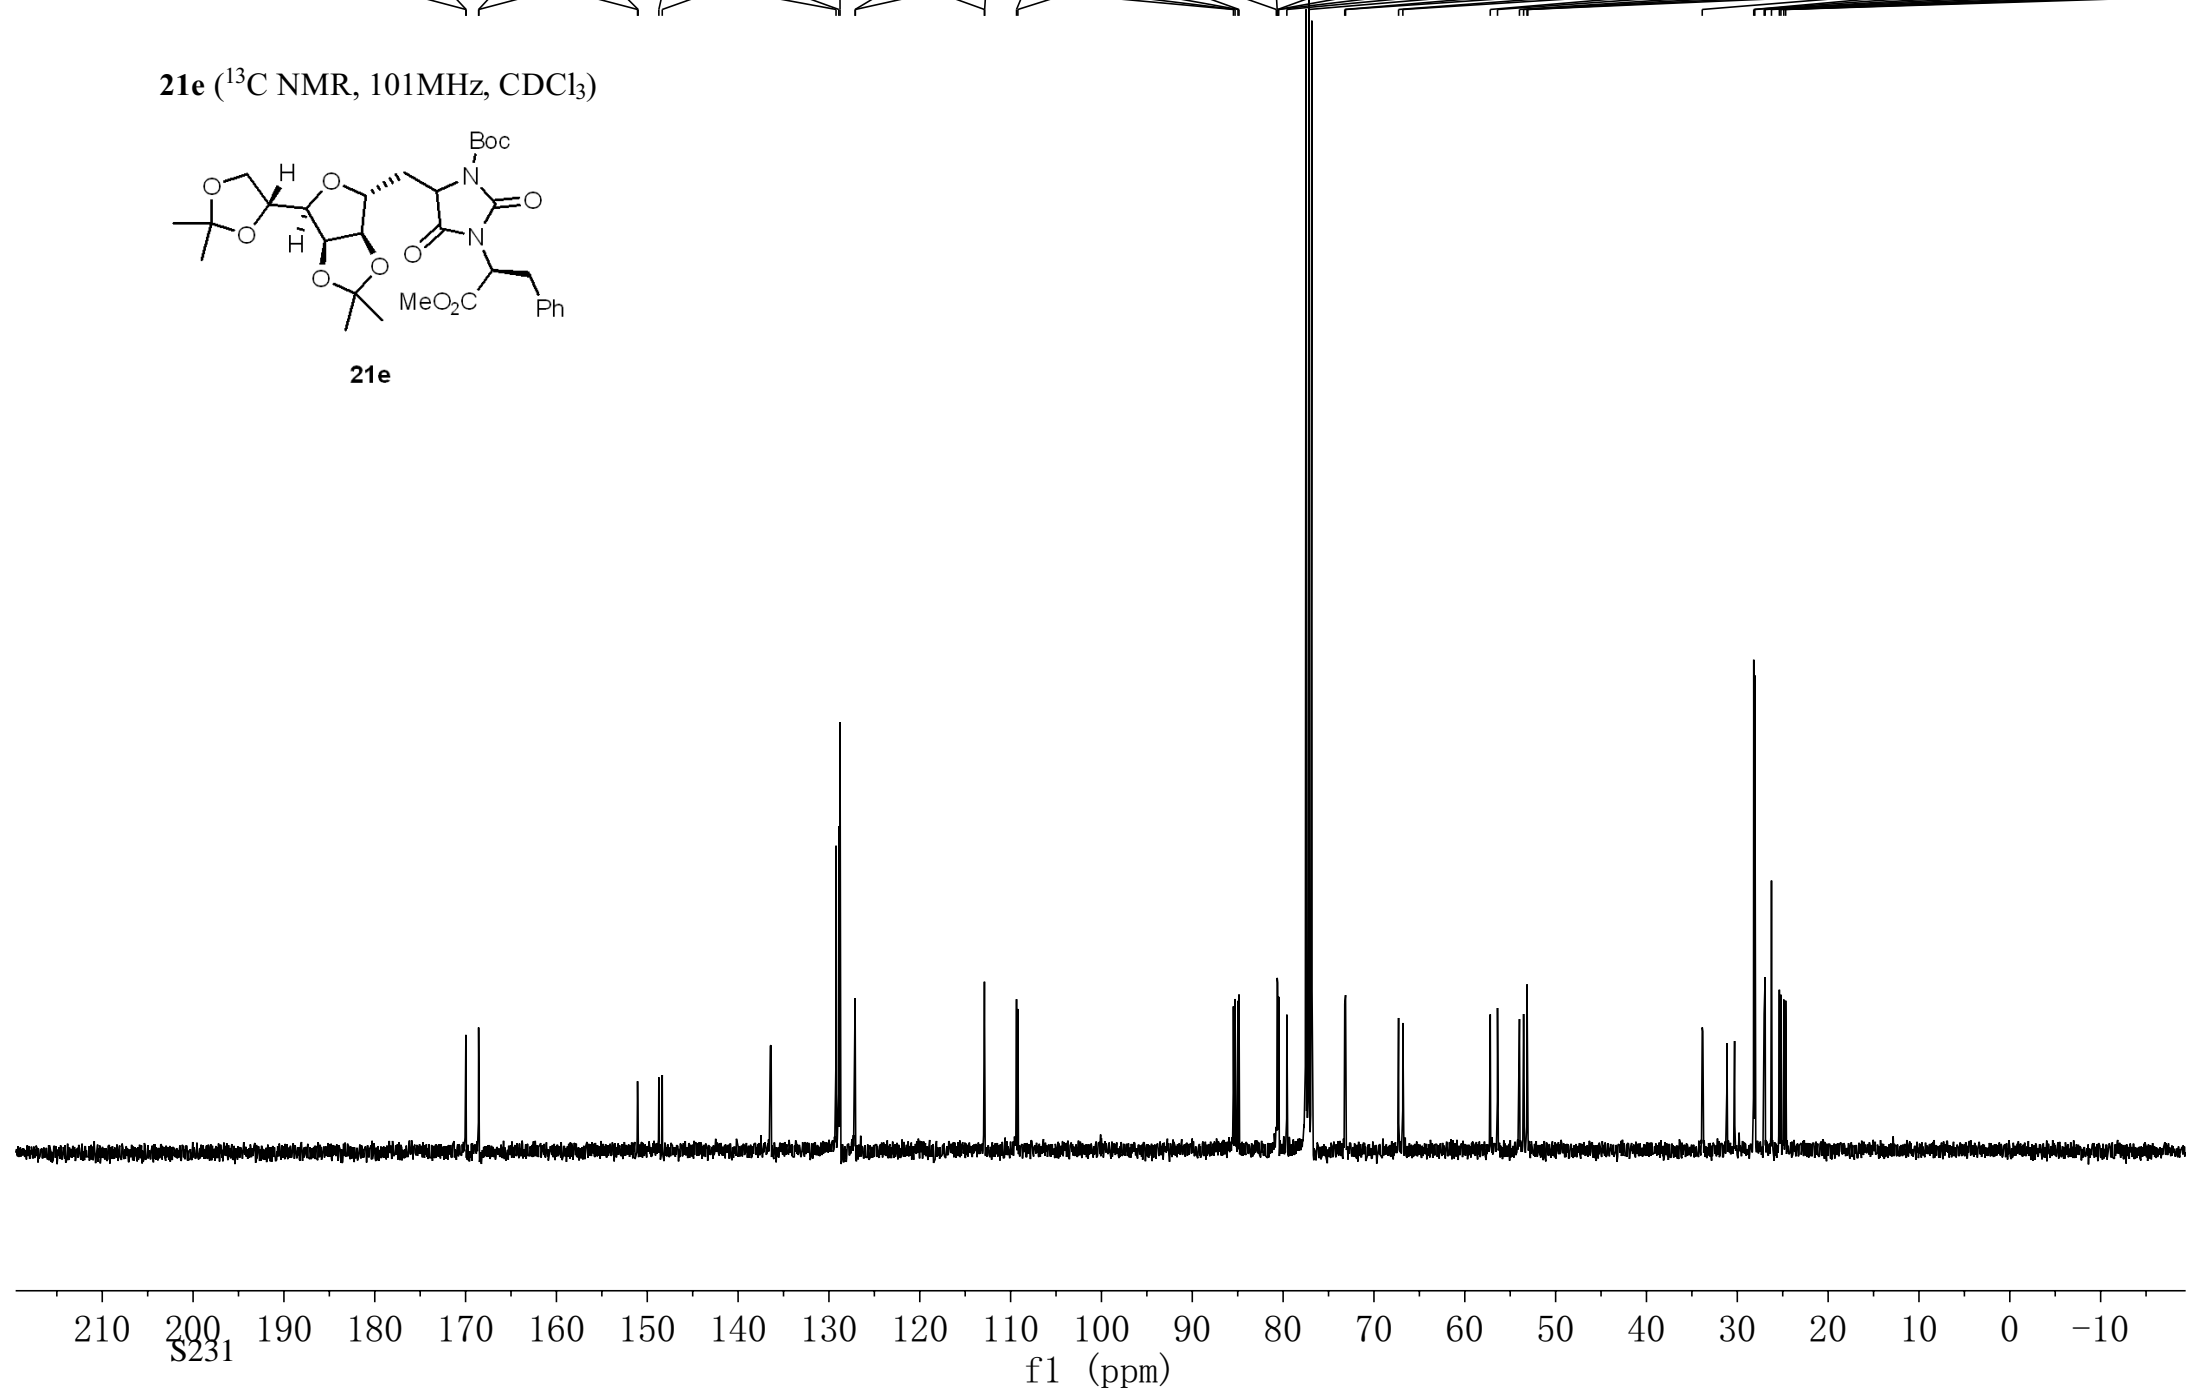

S231

f1 (ppm)

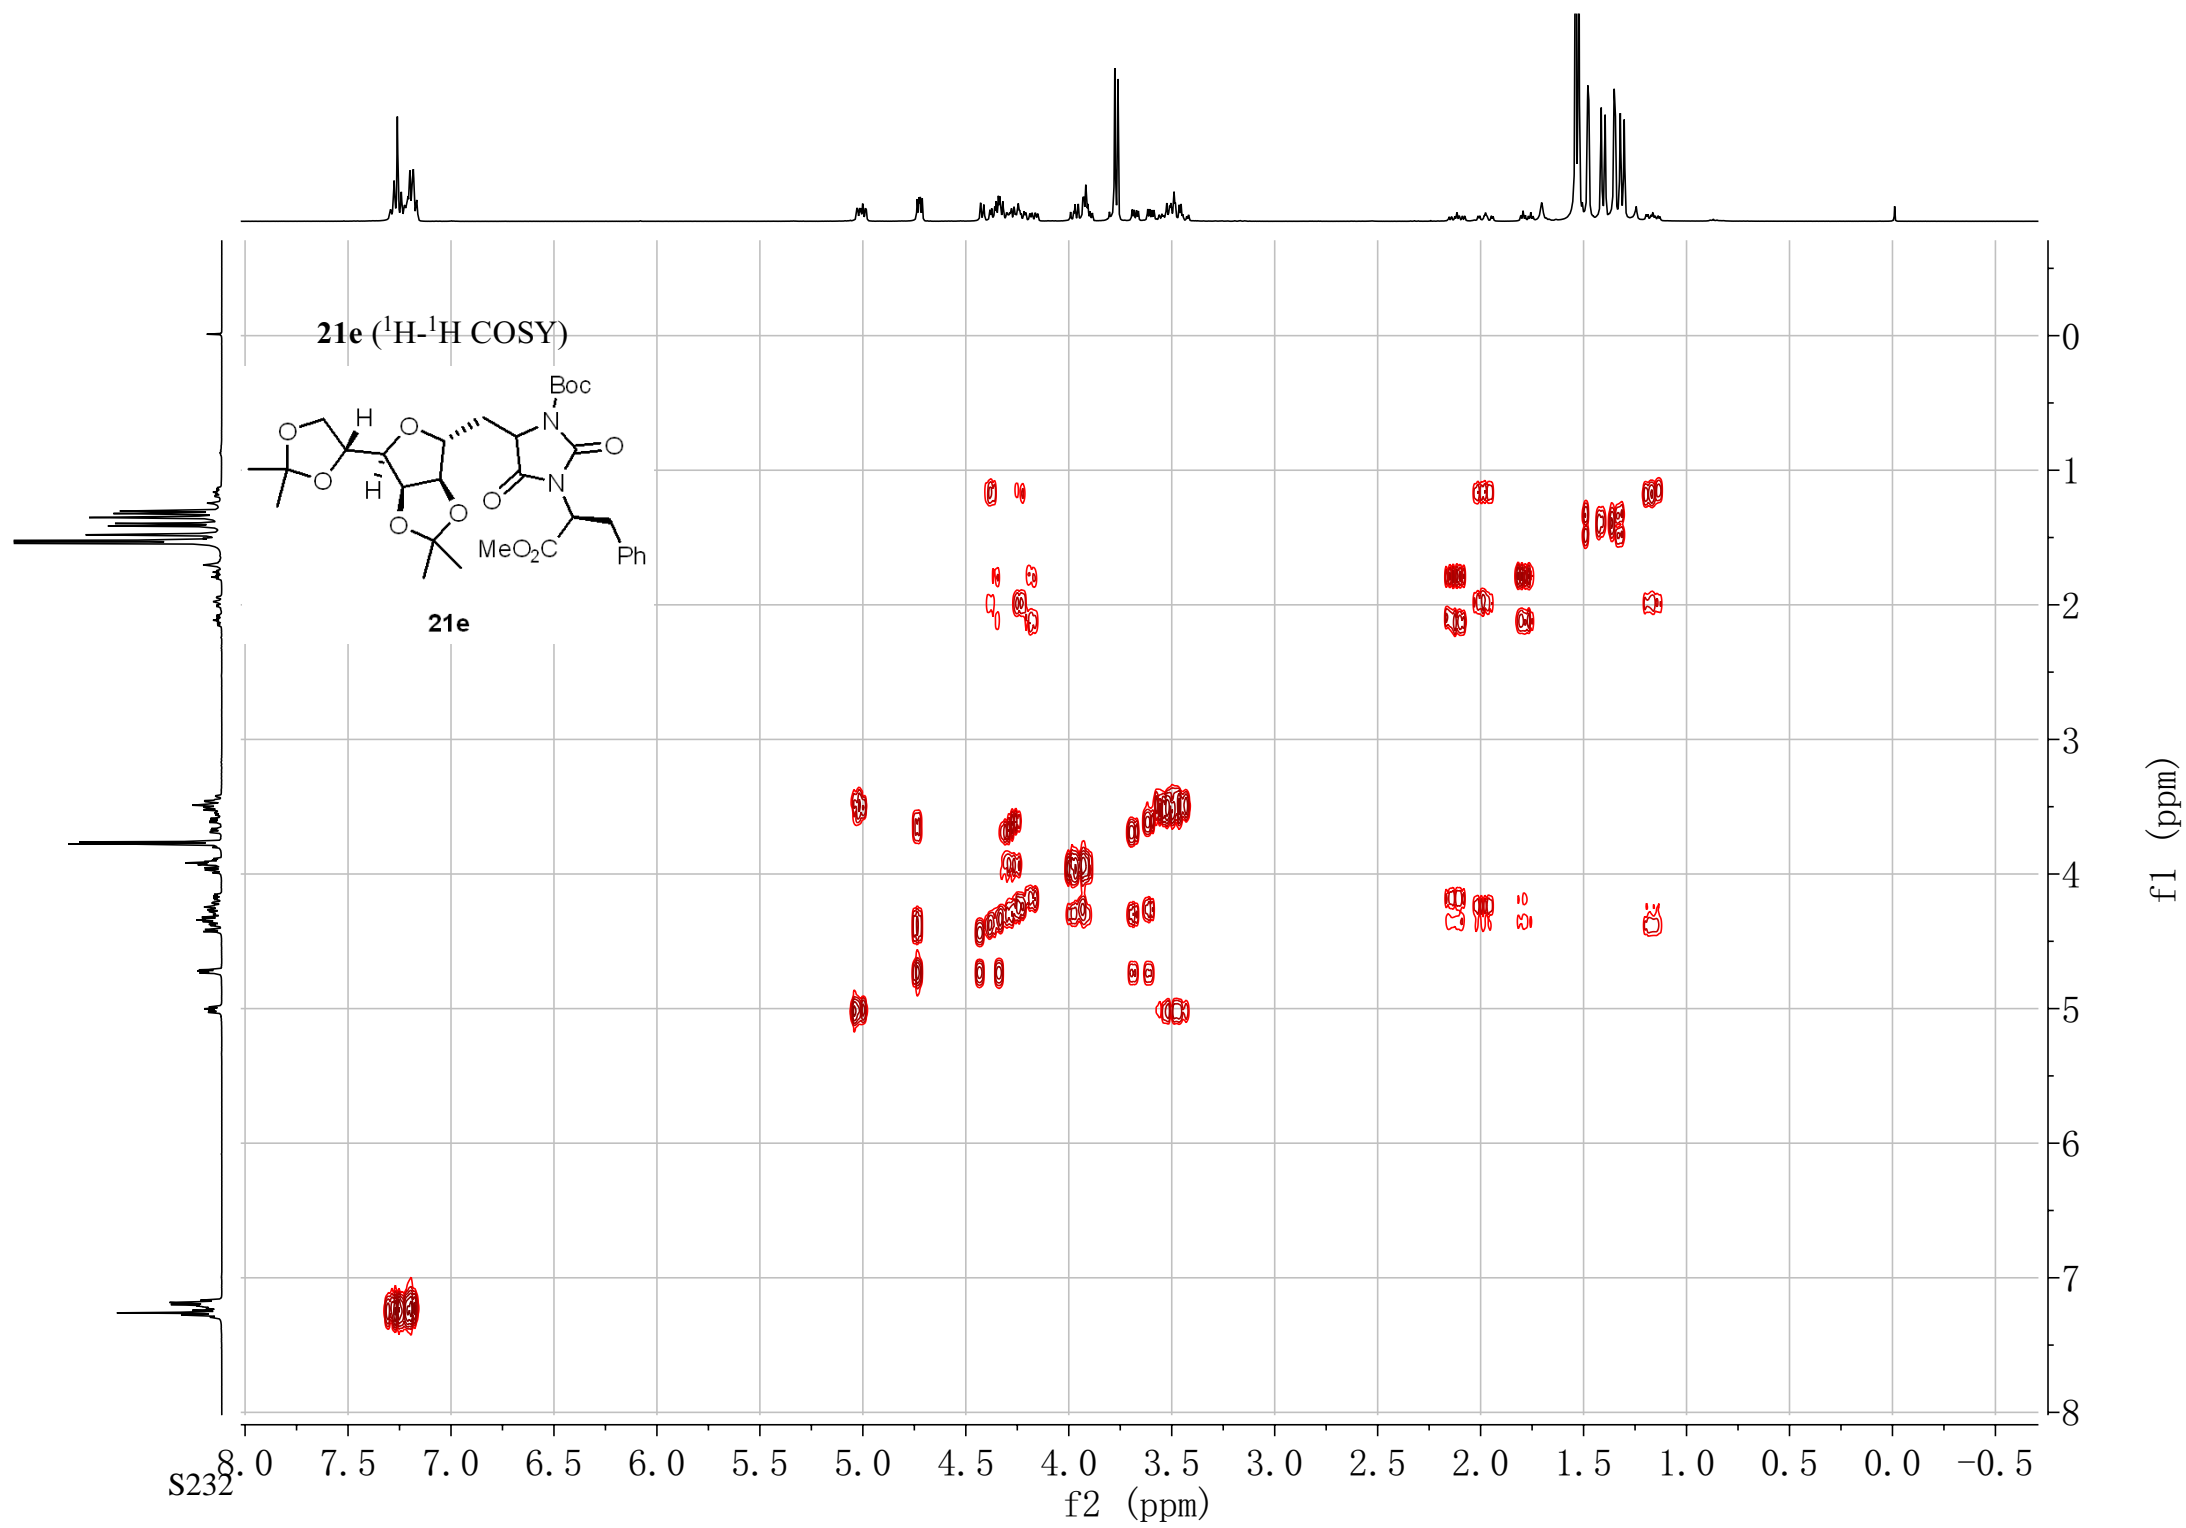

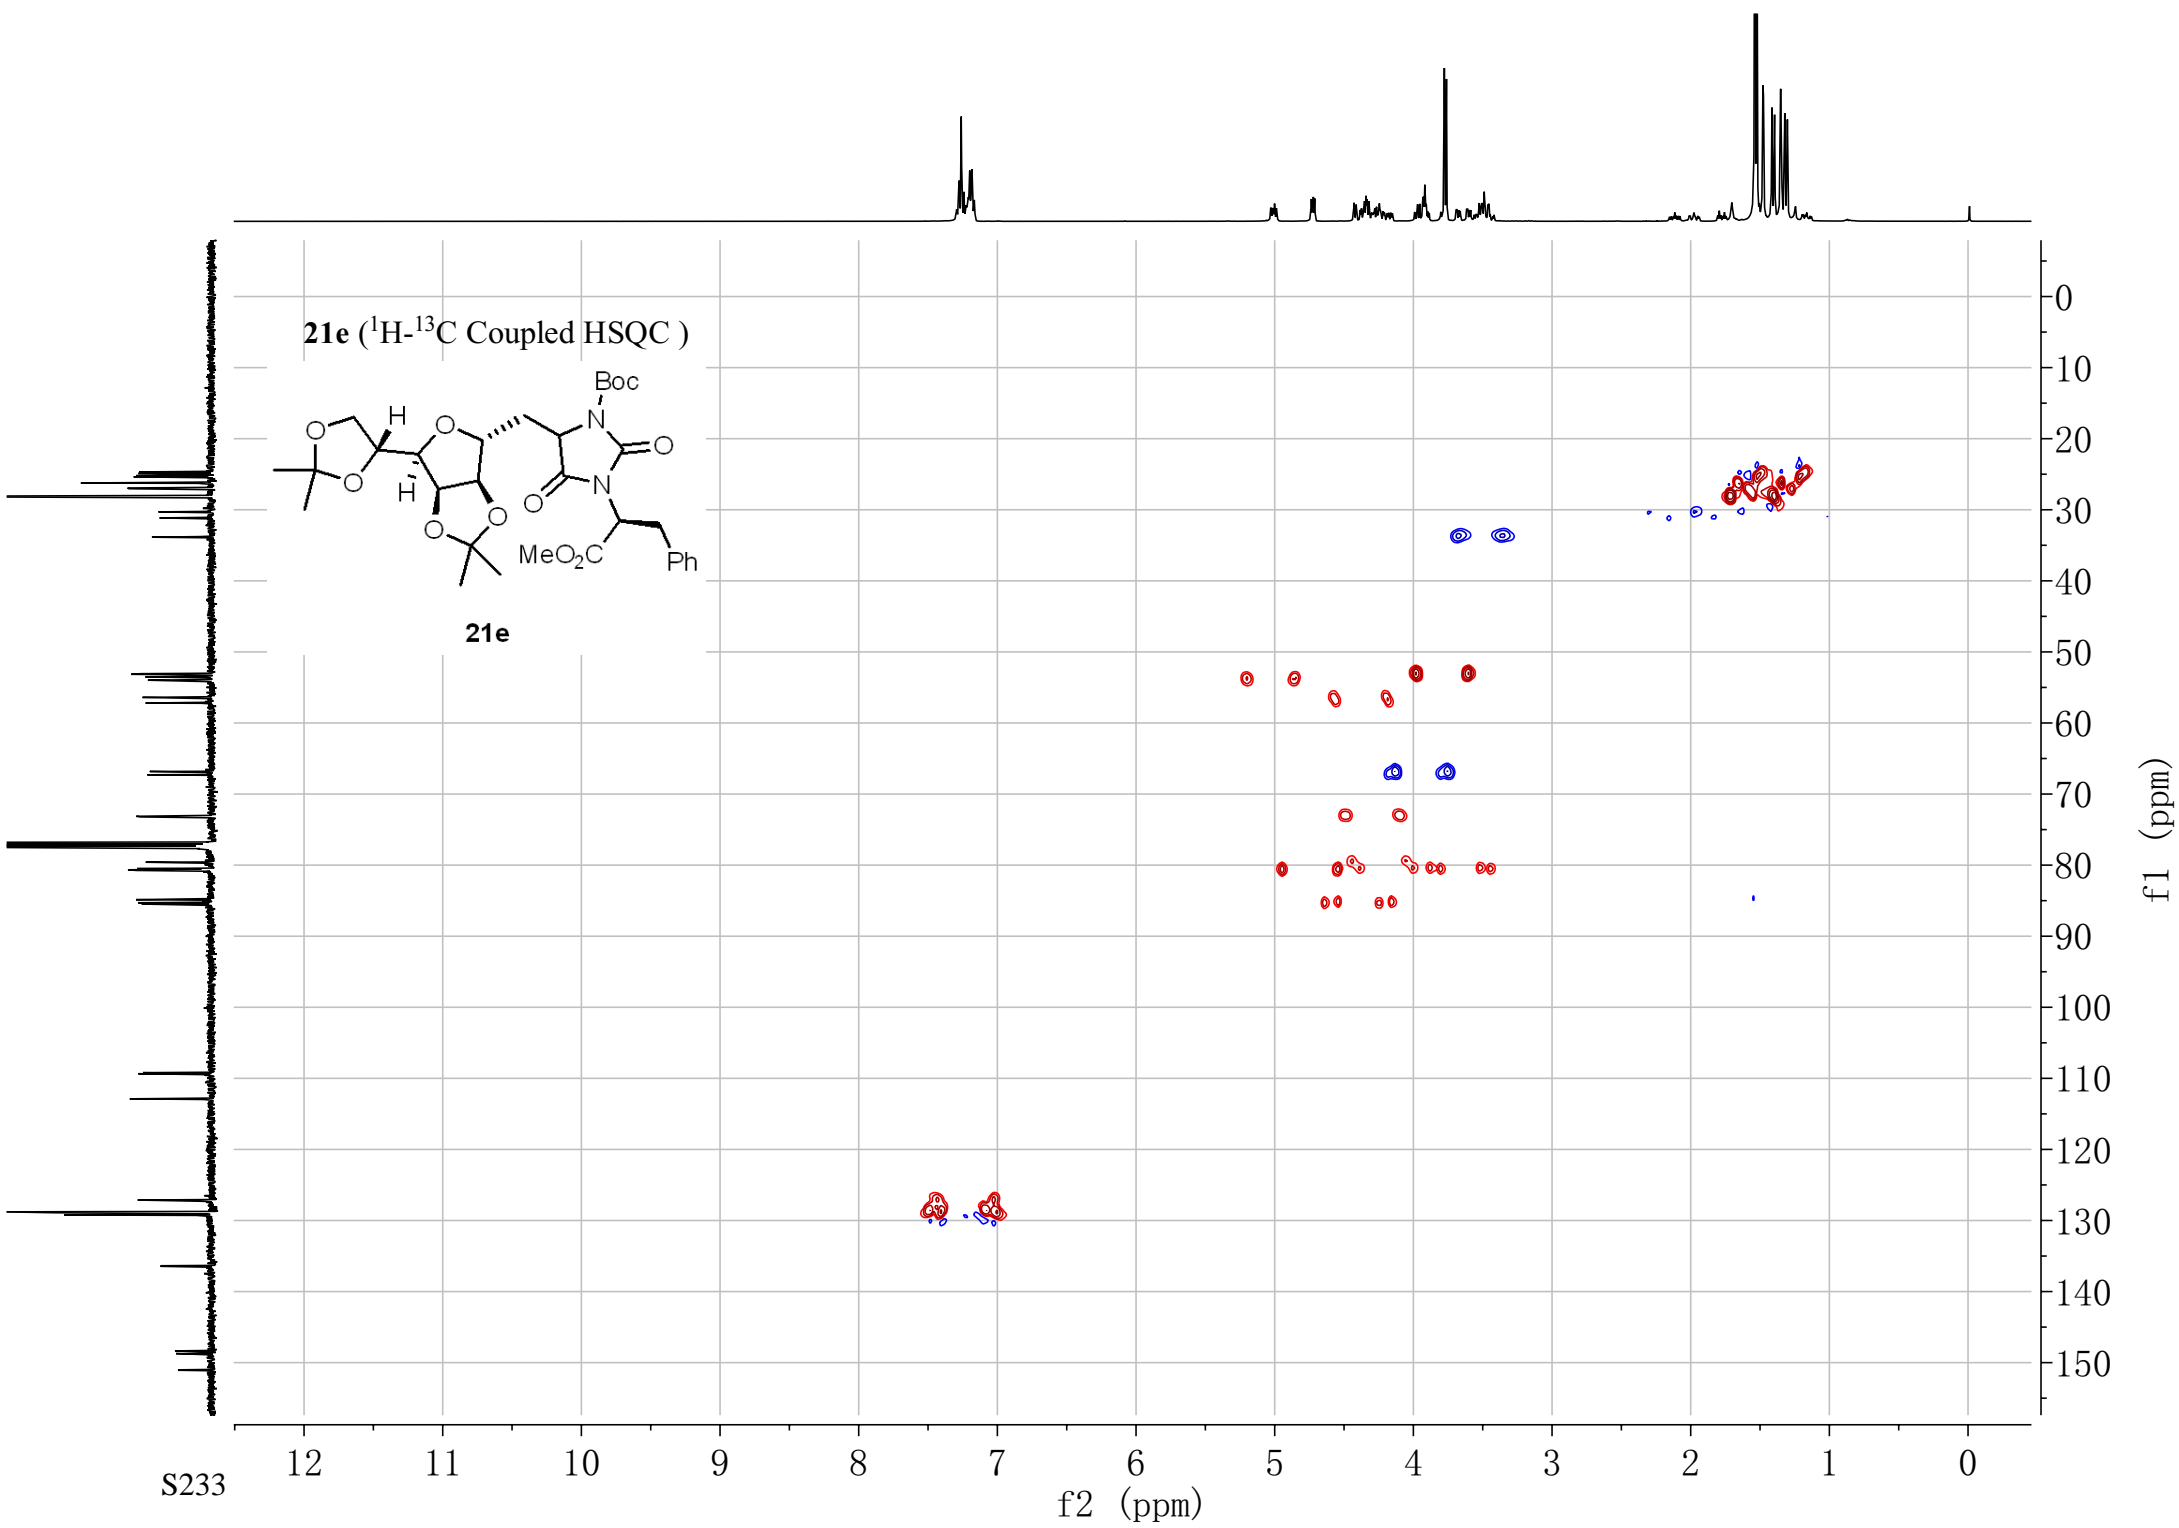

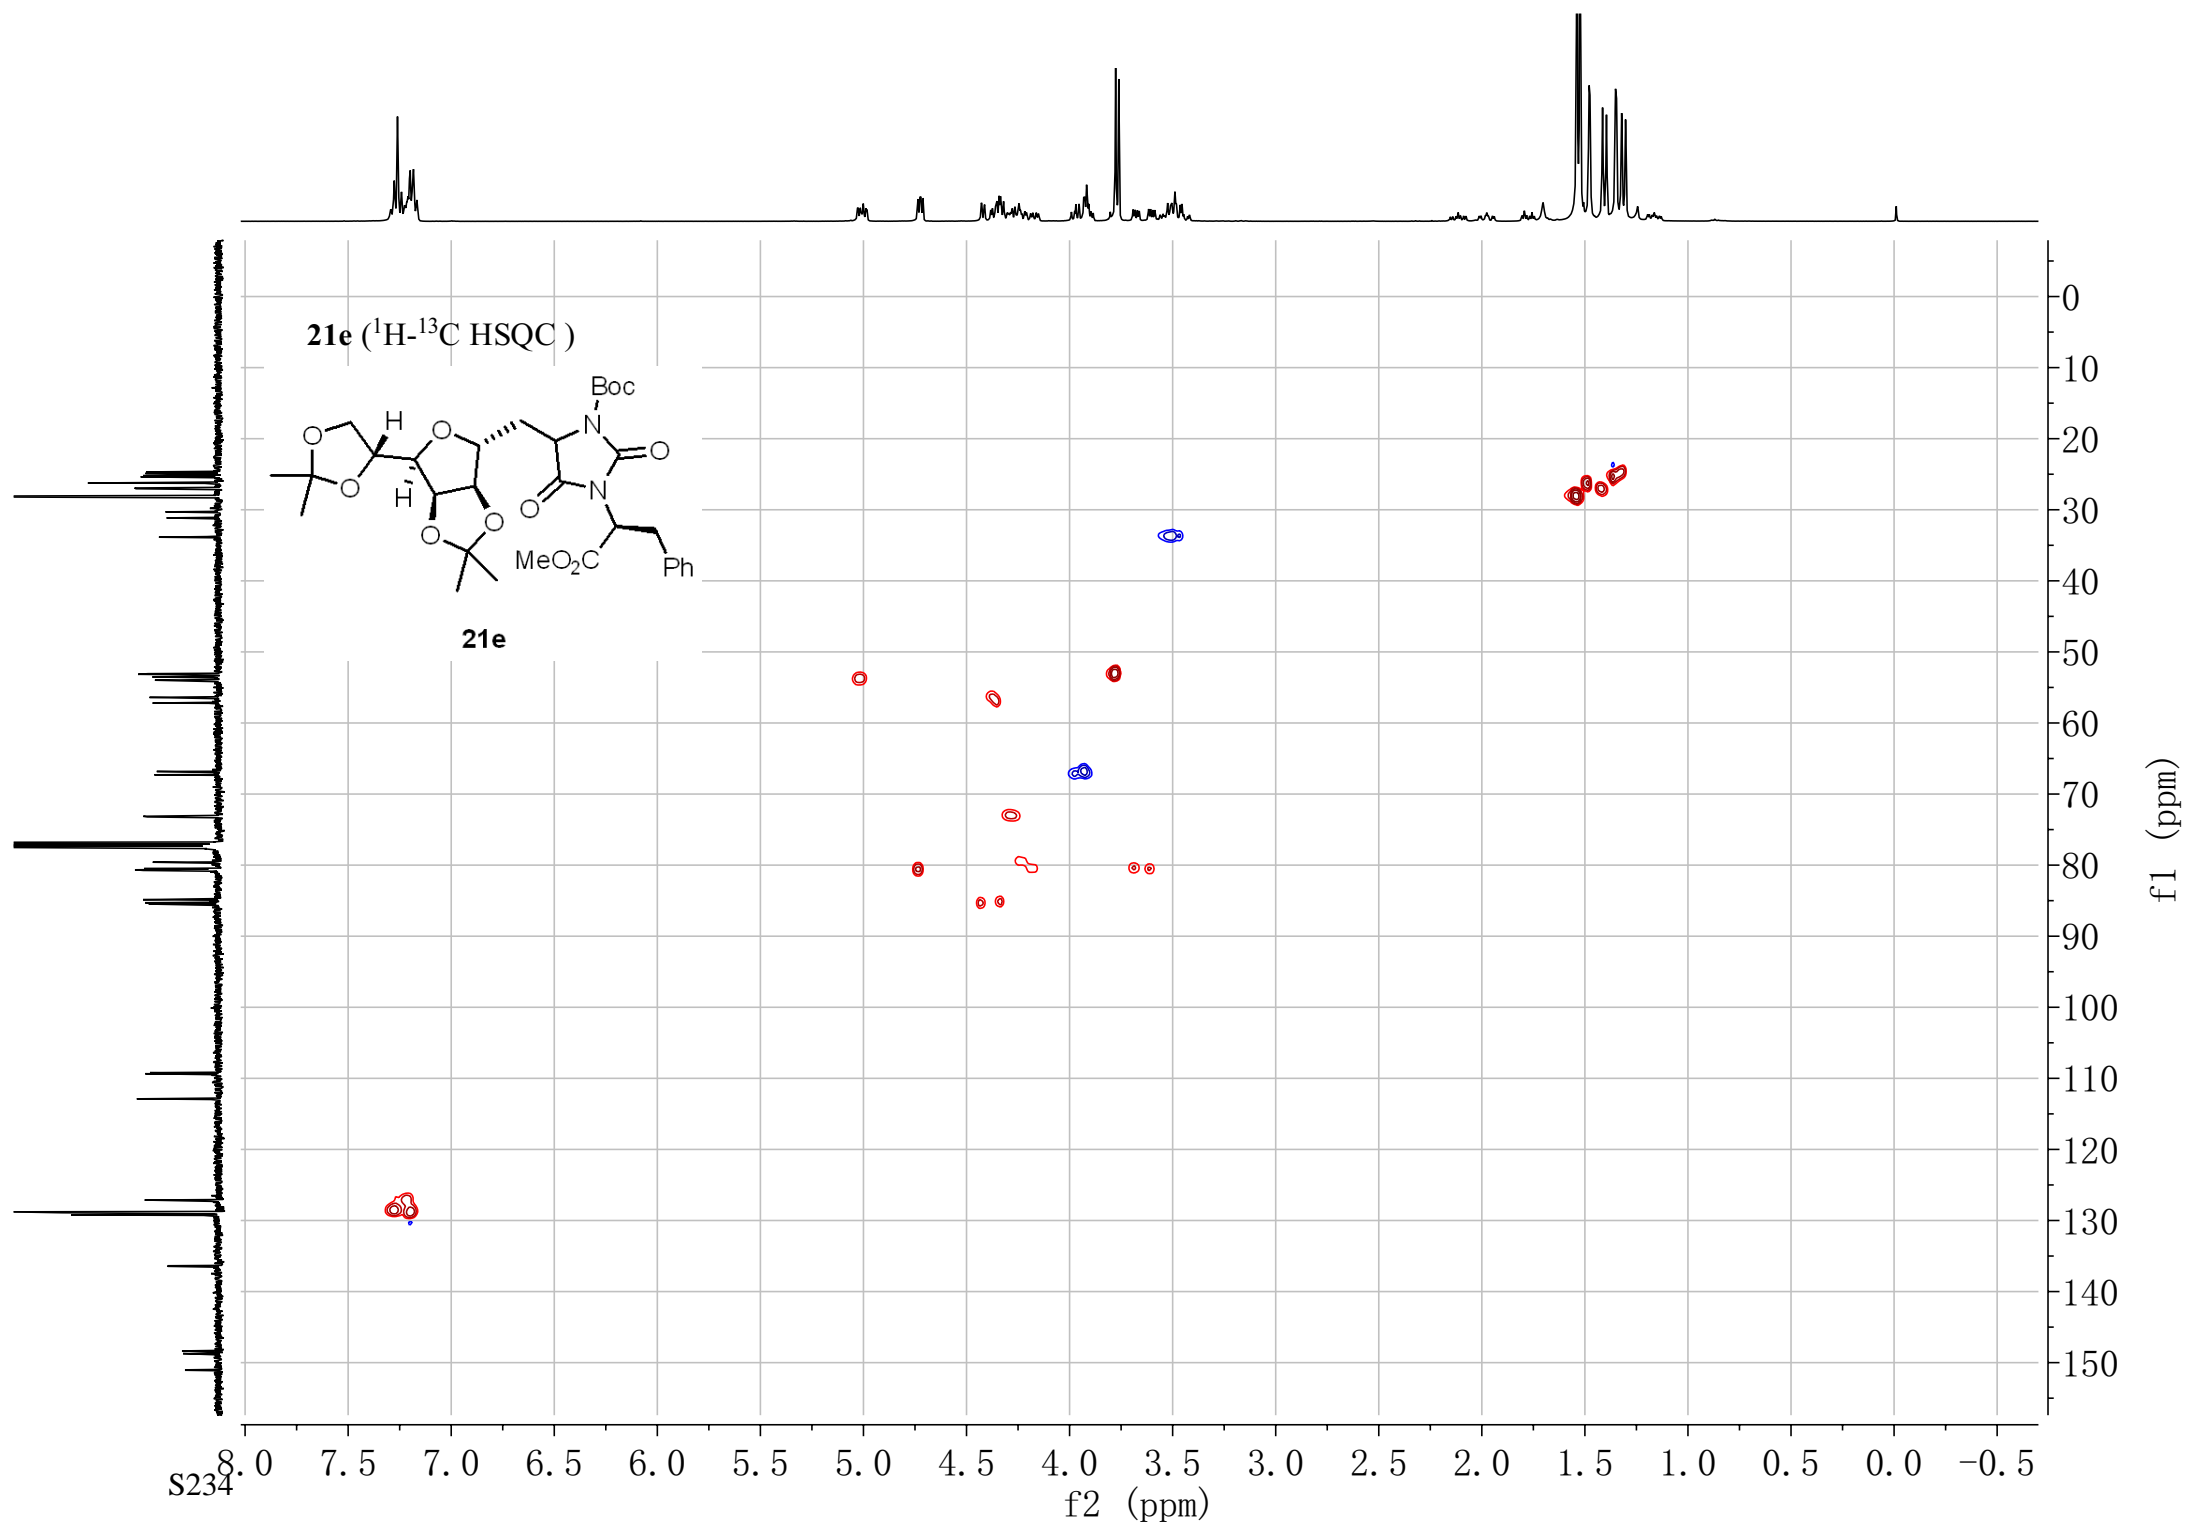

7.44  
7.43  
7.42  
7.41  
7.41  
7.39  
7.39  
7.37  
7.37  
7.35  
7.33  
7.33  
7.31  
7.28  
7.27  
7.26  
7.09  
7.06  
6.91  
6.90  
6.90  
6.89  
6.89  
6.88  
6.88  
5.63  
5.03  
5.02  
5.01  
4.60  
4.58  
4.40  
4.39  
4.39  
4.38  
4.14  
4.13  
4.10  
4.09  
4.09  
4.08  
4.07  
3.70  
3.67  
3.66  
1.49  
1.48  
1.47  
1.45  
1.44  
1.43  
1.42  
1.38  
1.38  
1.34  
1.33  
1.28  
1.28

**21f** (<sup>1</sup>H NMR, 400MHz, CDCl<sub>3</sub>)

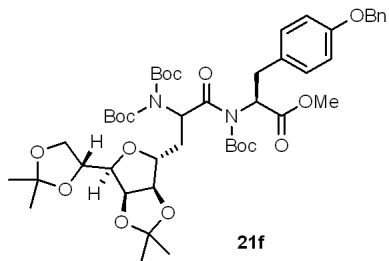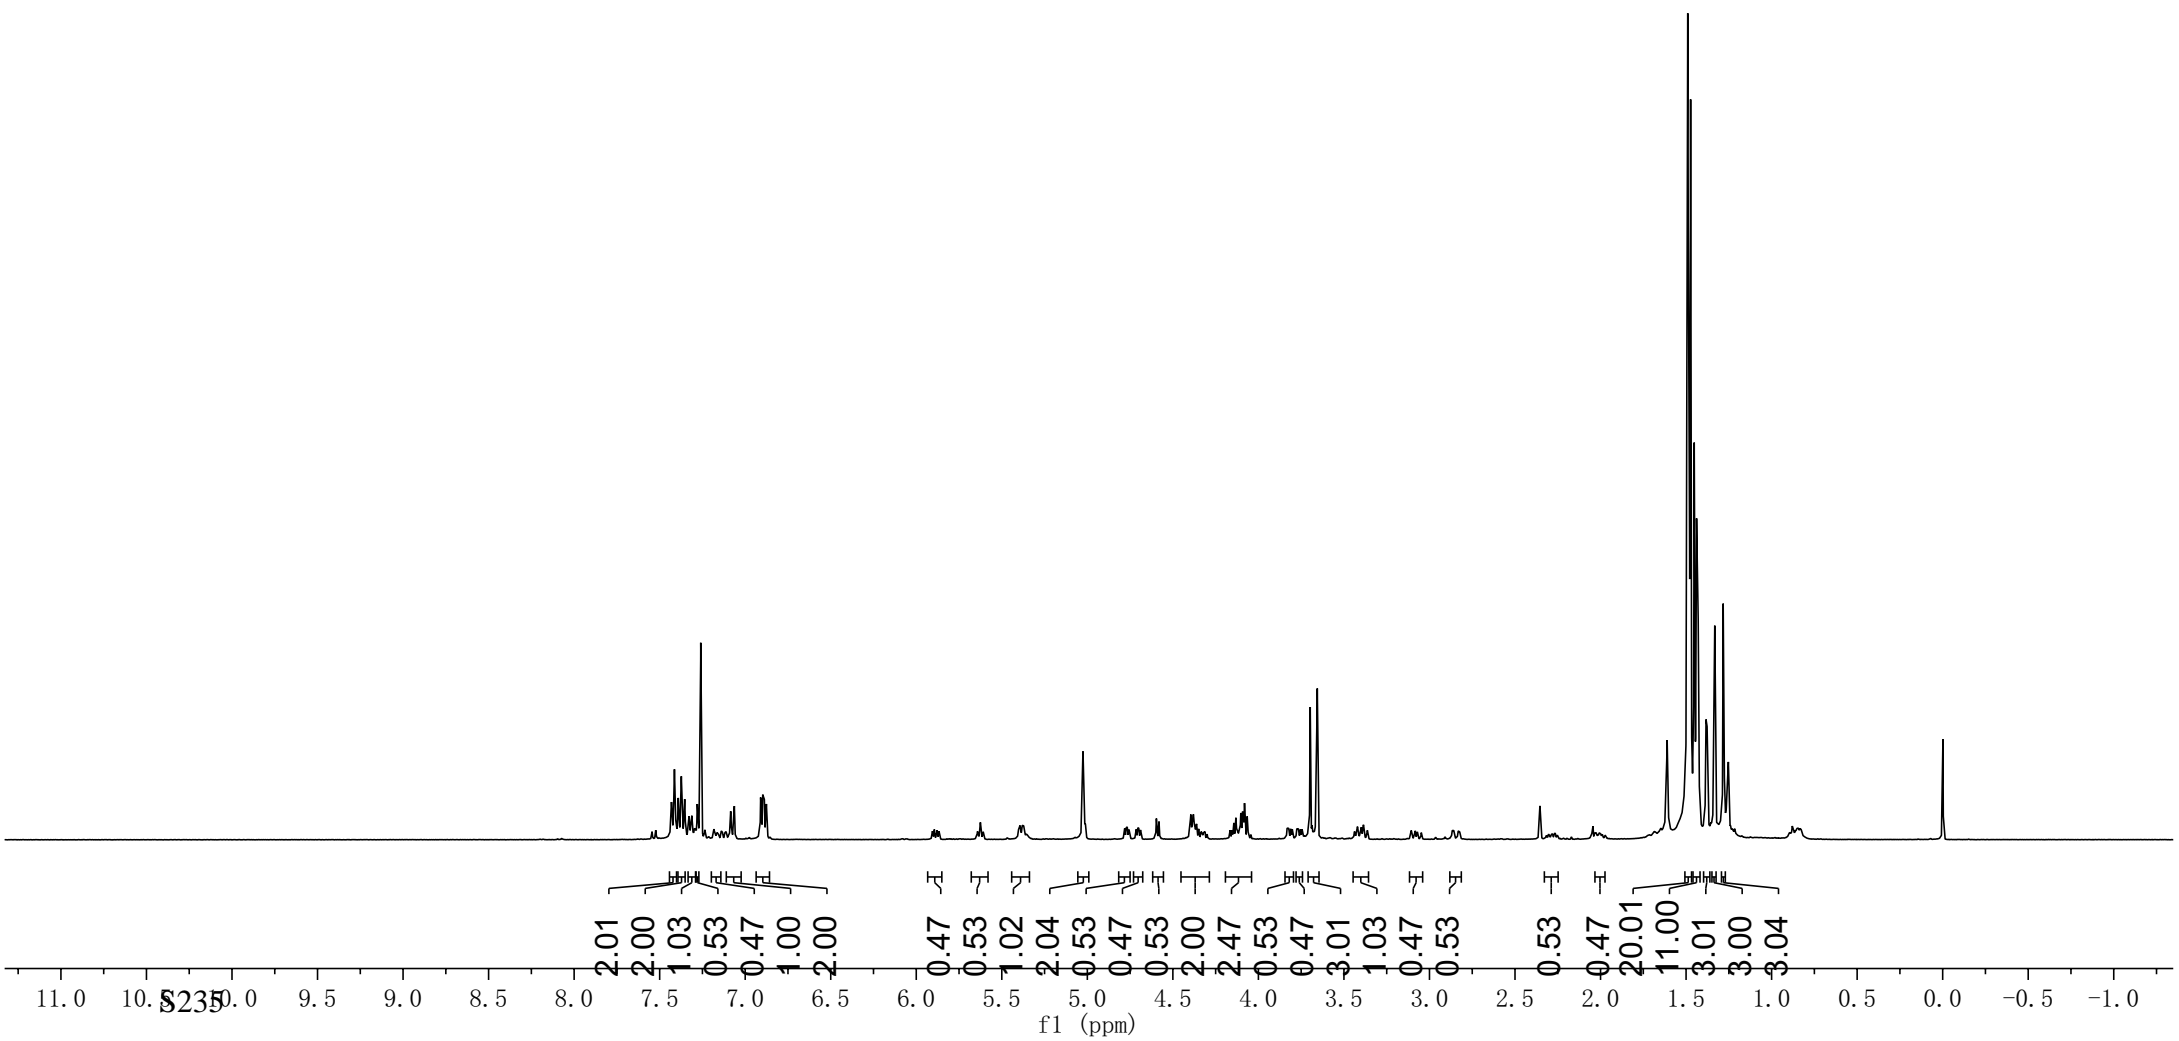

172.61  
171.11  
170.77  
157.55  
153.19  
152.64  
130.78  
130.63  
128.69  
128.12  
128.02  
127.71  
127.63  
115.02  
114.75  
112.56  
109.36  
109.33  
85.81  
85.44  
84.46  
84.03  
83.08  
82.36  
82.34  
80.83  
80.53  
80.38  
77.48  
77.16  
76.84  
73.45  
73.25  
70.27  
70.10  
67.73  
67.35  
58.83  
58.76  
58.45  
52.37  
52.27  
31.58  
31.10  
30.32  
29.84  
28.13  
28.07  
28.04  
28.02  
27.98  
26.98  
26.92  
26.31  
26.21  
25.55  
25.51  
24.96  
24.79

21f (<sup>13</sup>C NMR, 101MHz, CDCl<sub>3</sub>)

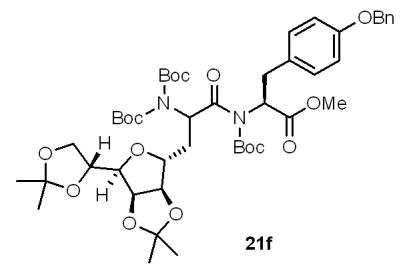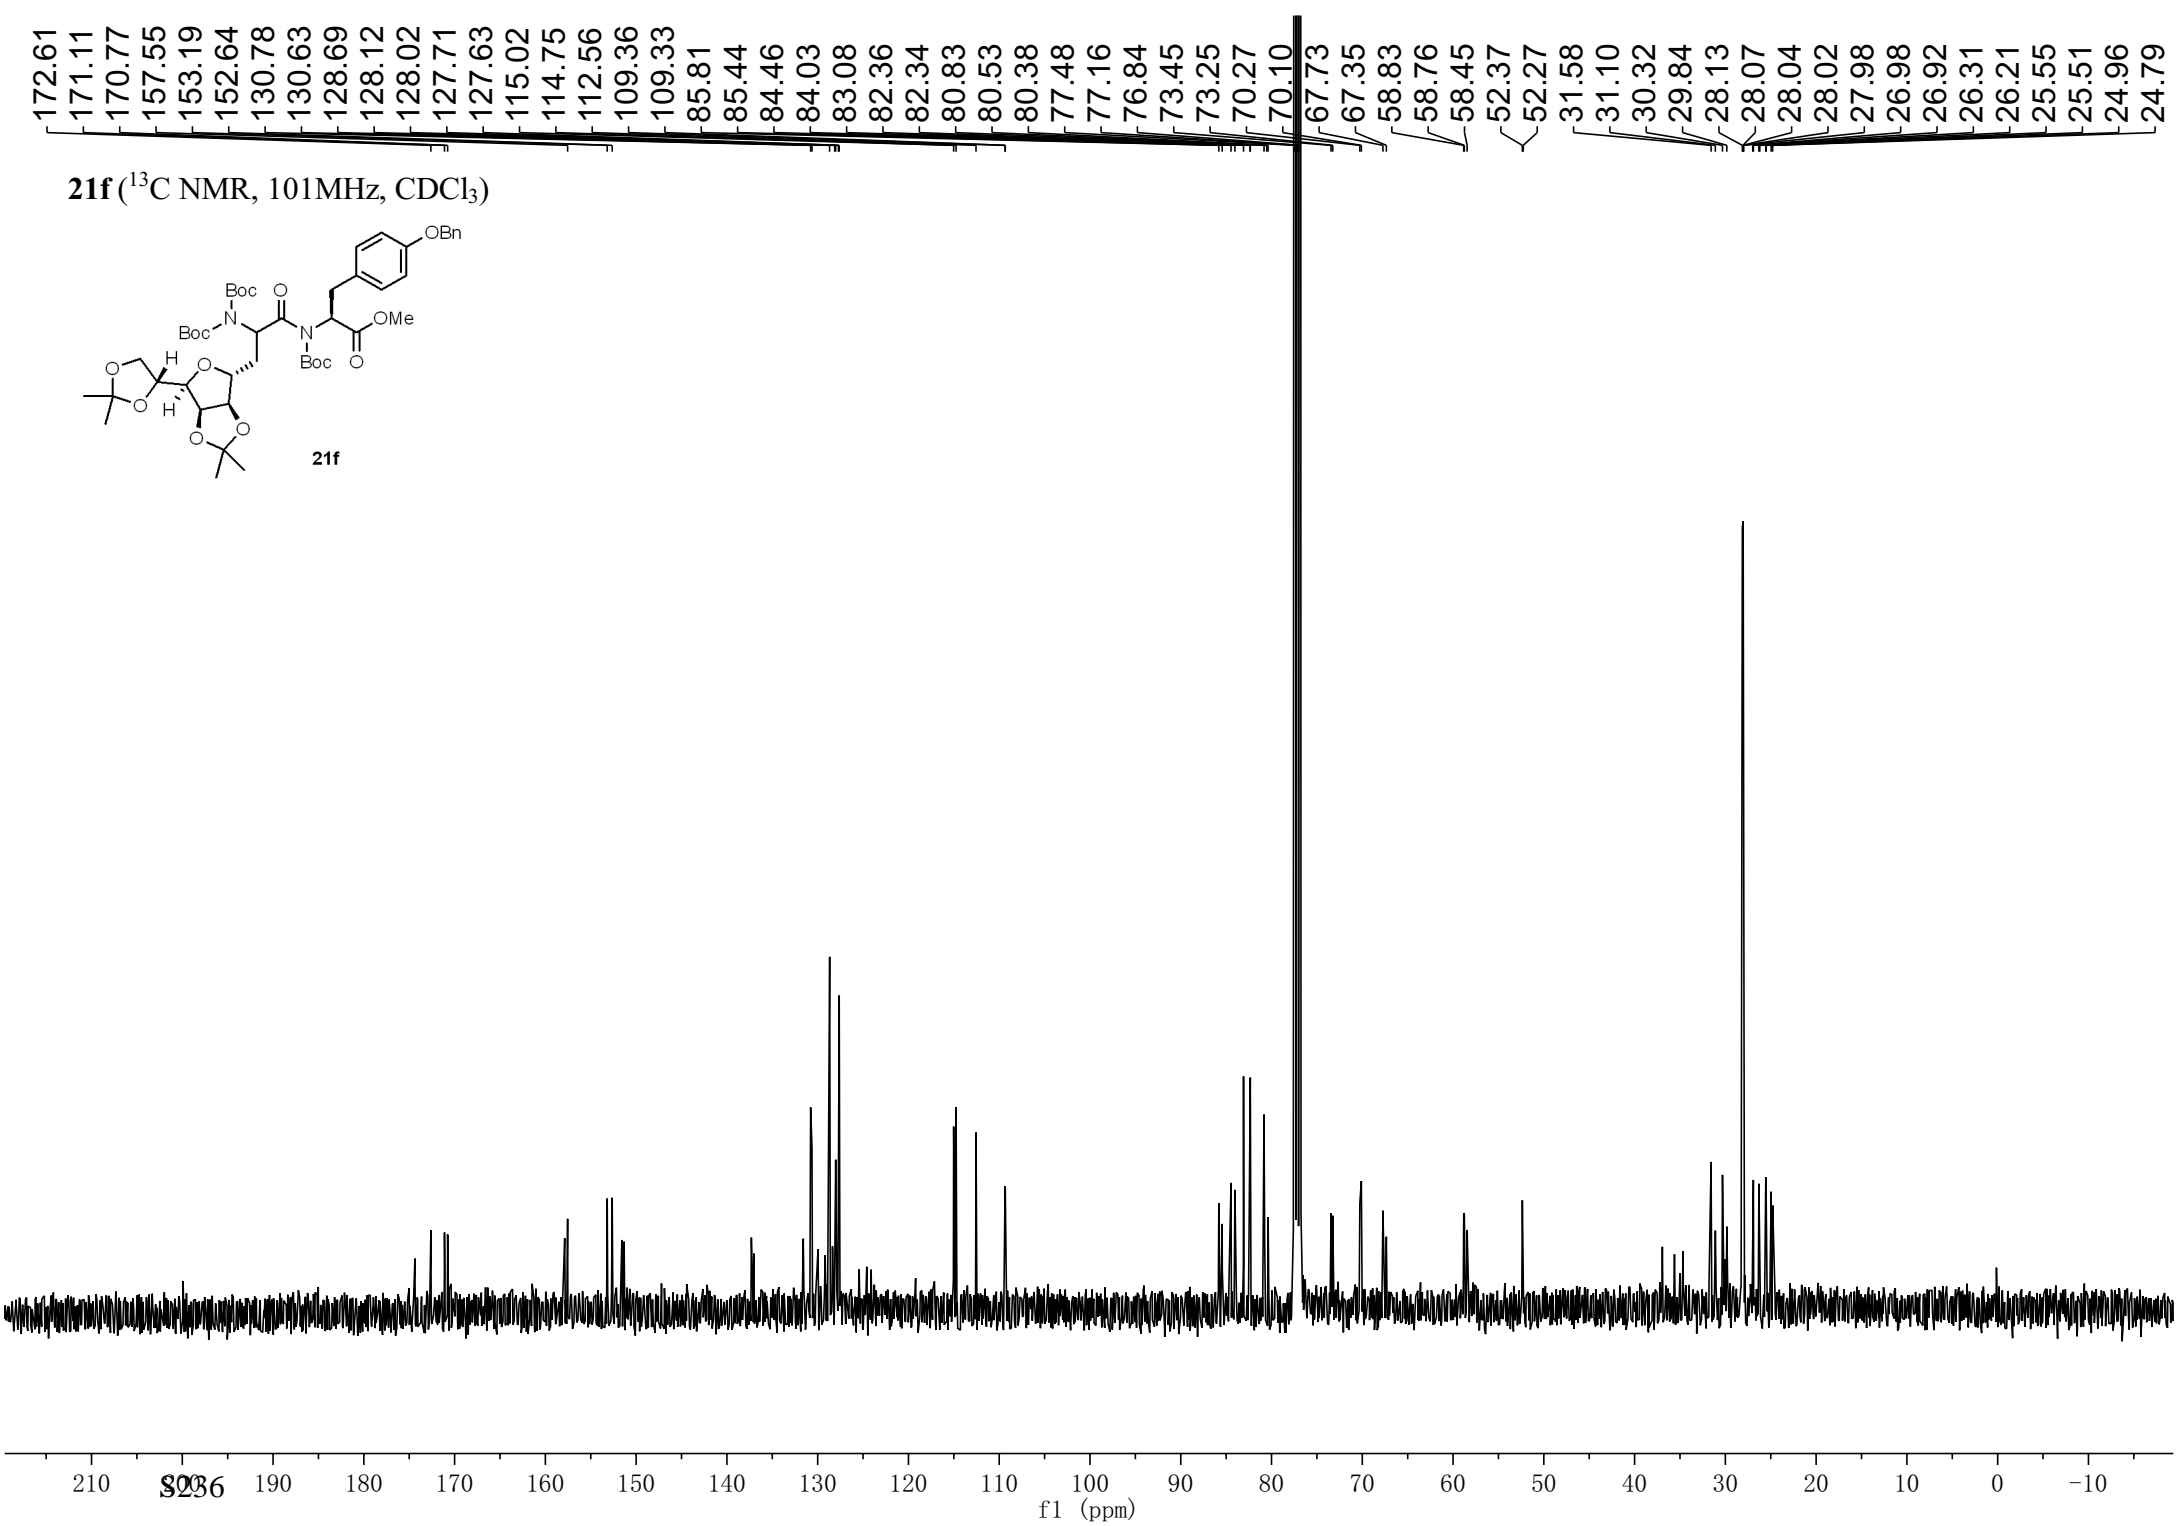

210 190 180 170 160 150 140 130 120 110 100 90 80 70 60 50 40 30 20 10 0 -10

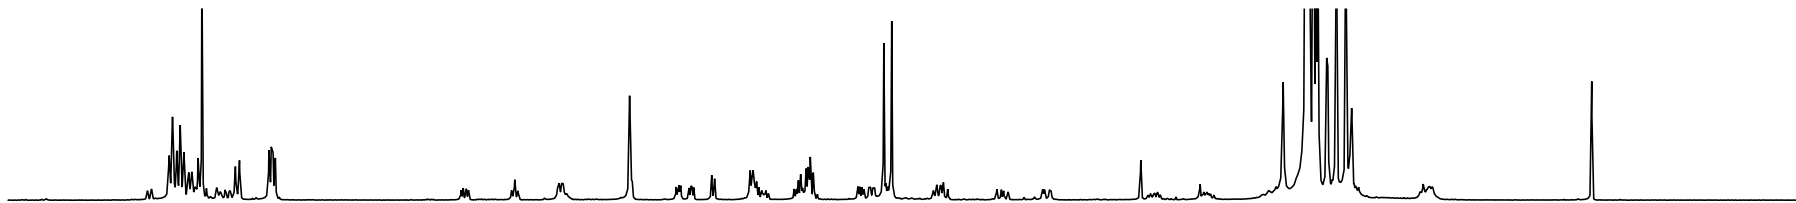

21f (<sup>1</sup>H - <sup>1</sup>H COSY)

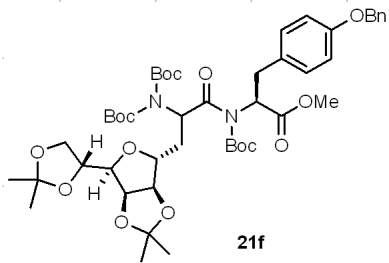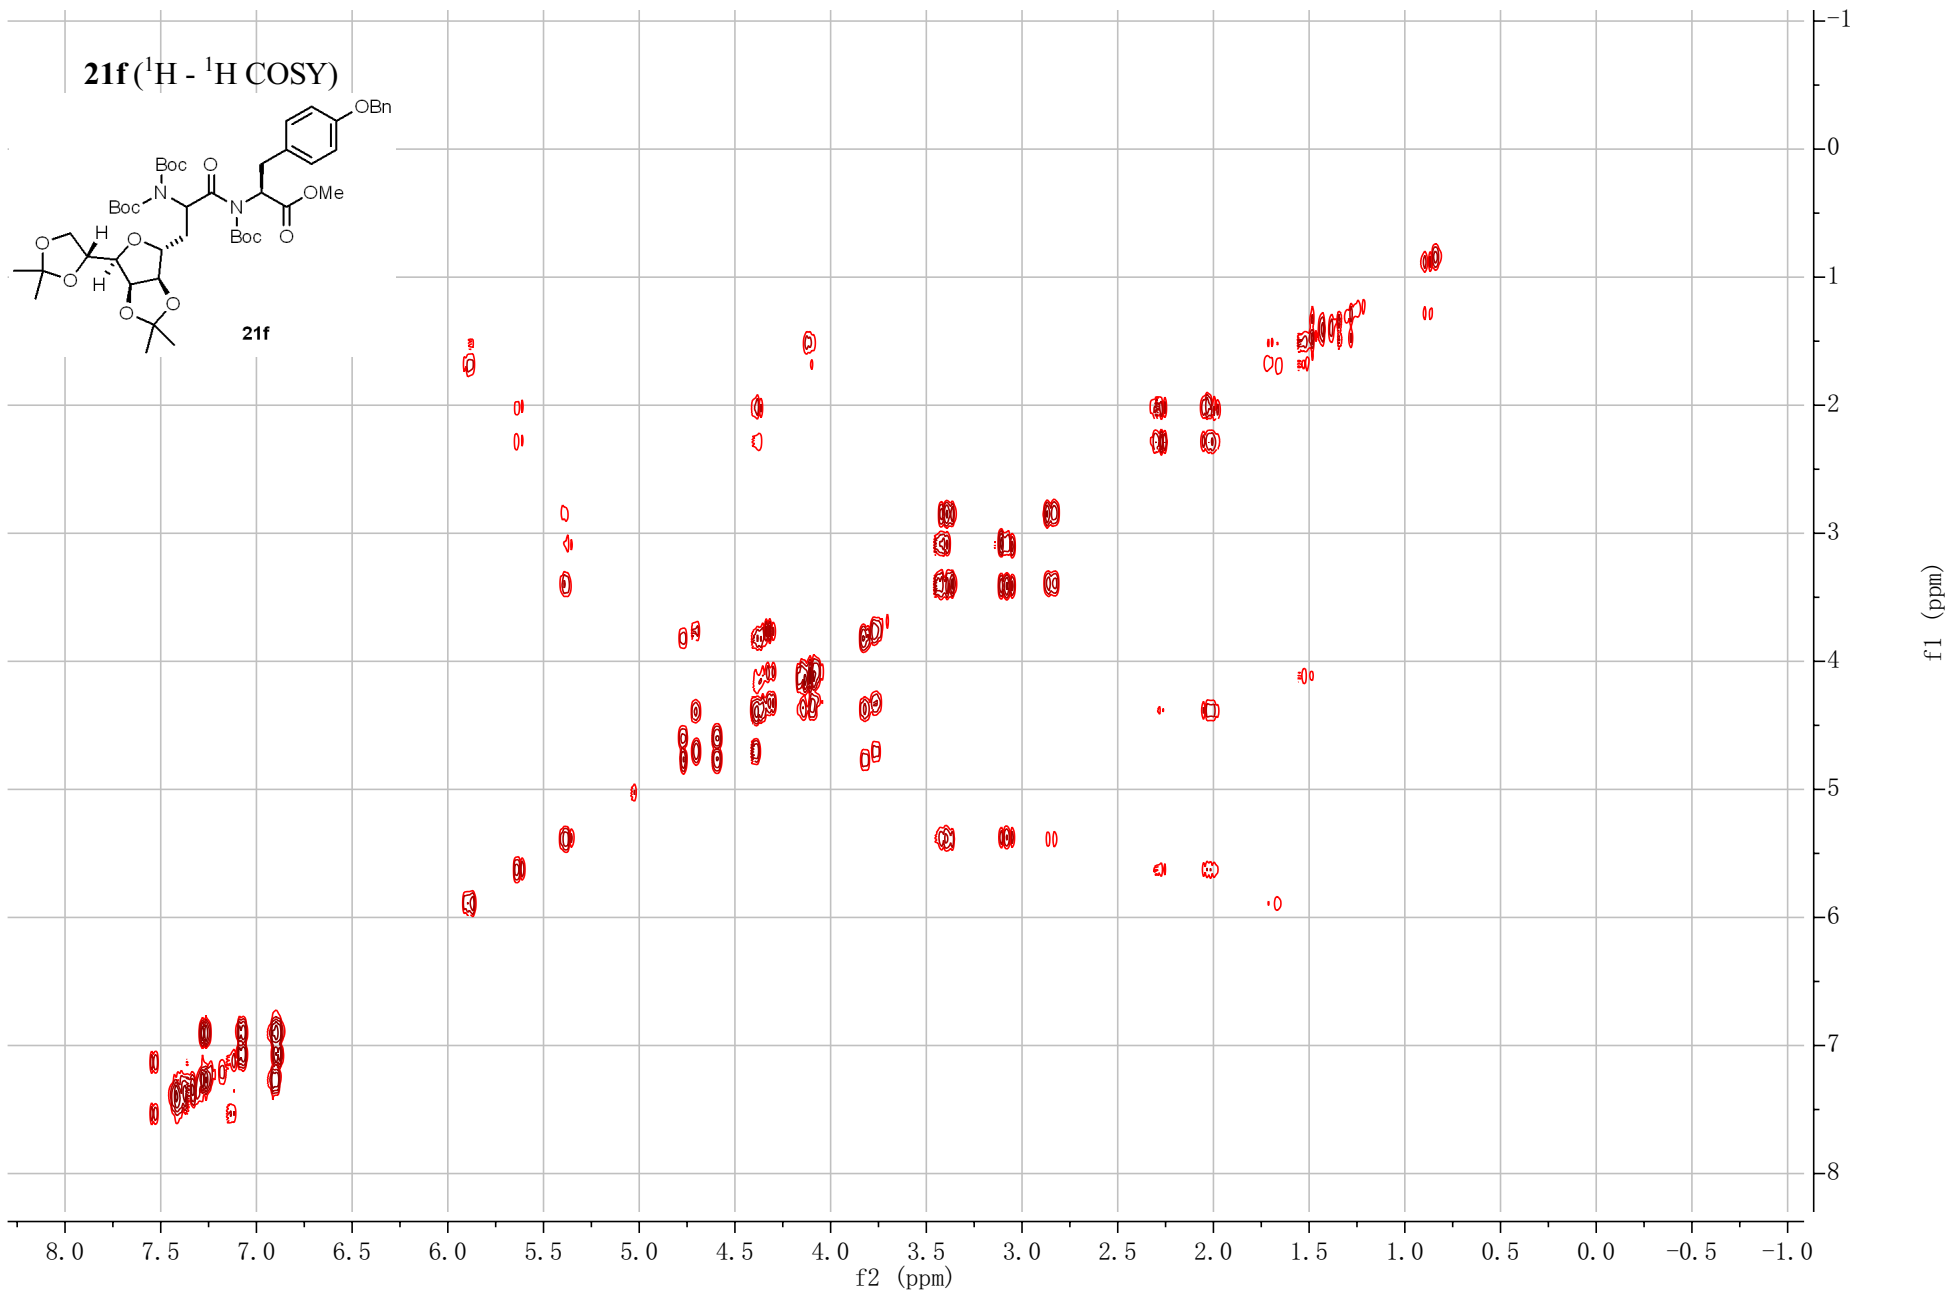





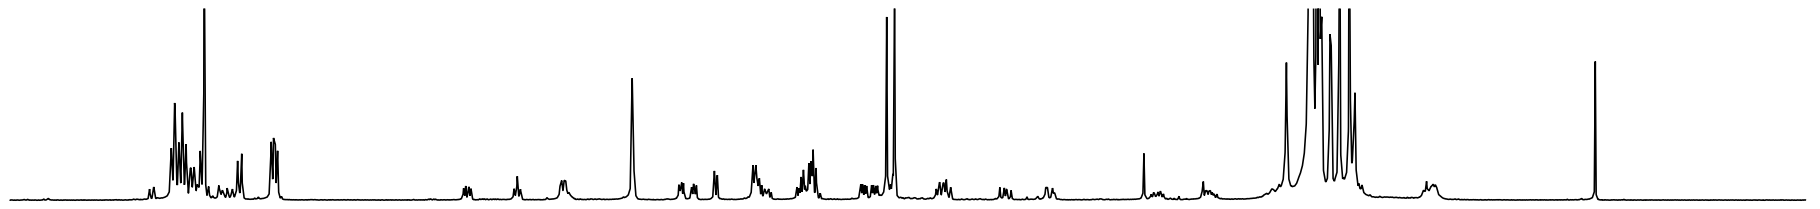

21f ( $^1\text{H} - ^{13}\text{C}$  HSQC)

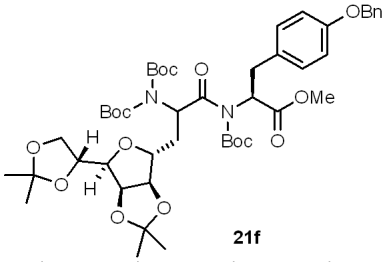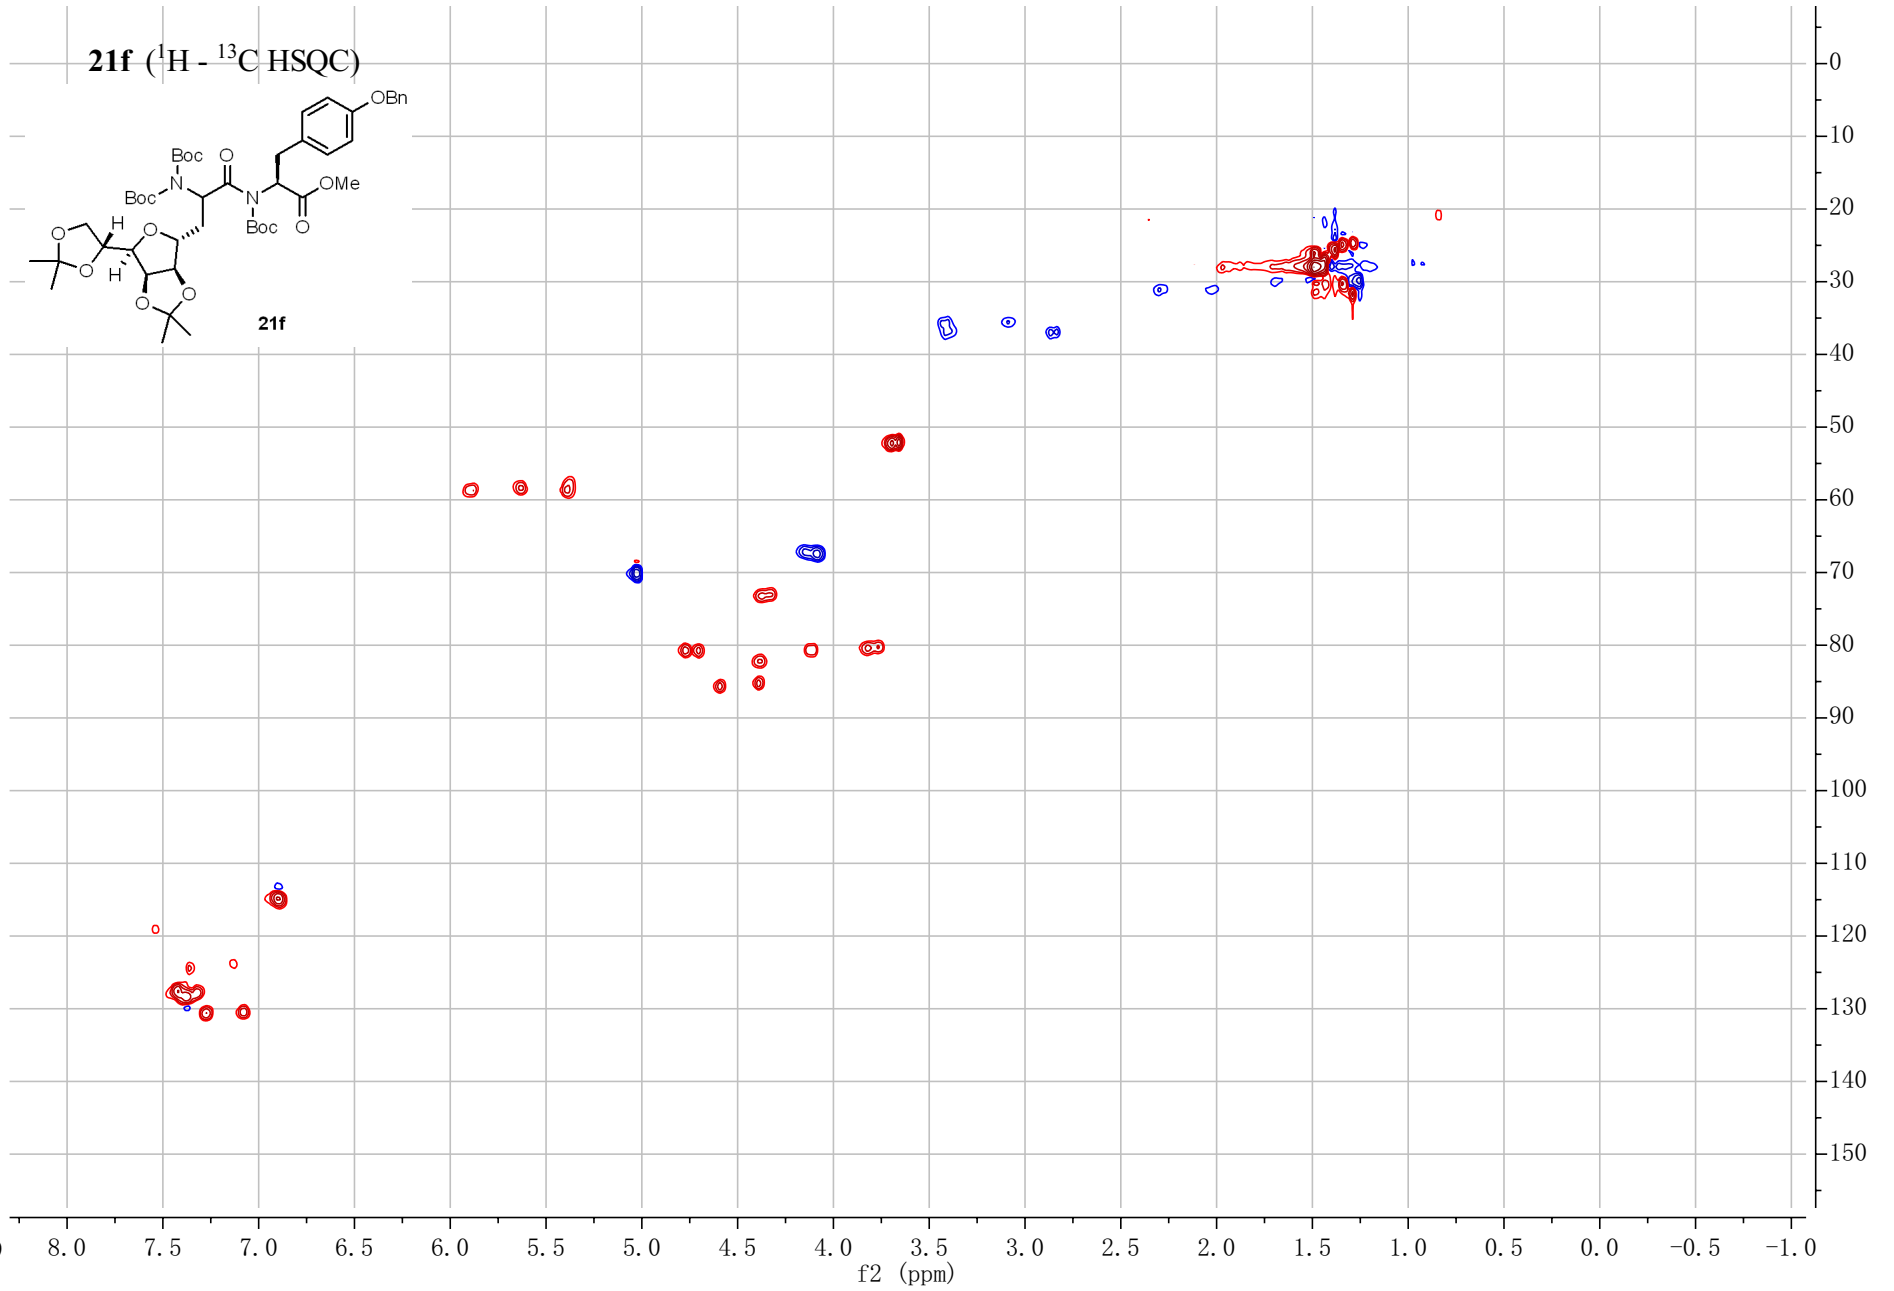

S239

6.59 6.57 4.91 4.90 4.88 4.75 4.75 4.74 4.73 4.73 4.72 4.59 4.58 4.58 4.57 4.53 4.51 4.34 4.33 4.33 4.32 4.32 4.24 4.23 4.21 4.20 4.07 4.06 4.05 4.05 4.04 4.02 3.80 3.79 3.78 3.77 3.77 3.70 3.68 3.66 3.65 3.64 3.63 3.47 3.46 3.44 3.44 2.36 2.33 1.48 1.47 1.44 1.40 1.38 1.33 1.31 1.30 1.10 1.09

21g (<sup>1</sup>H NMR, 400MHz, CDCl<sub>3</sub>)

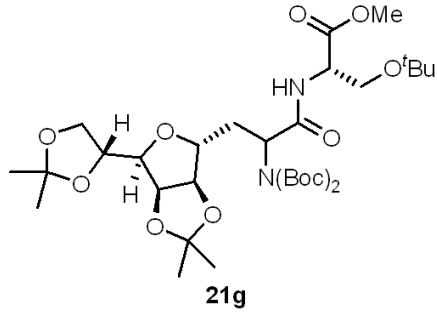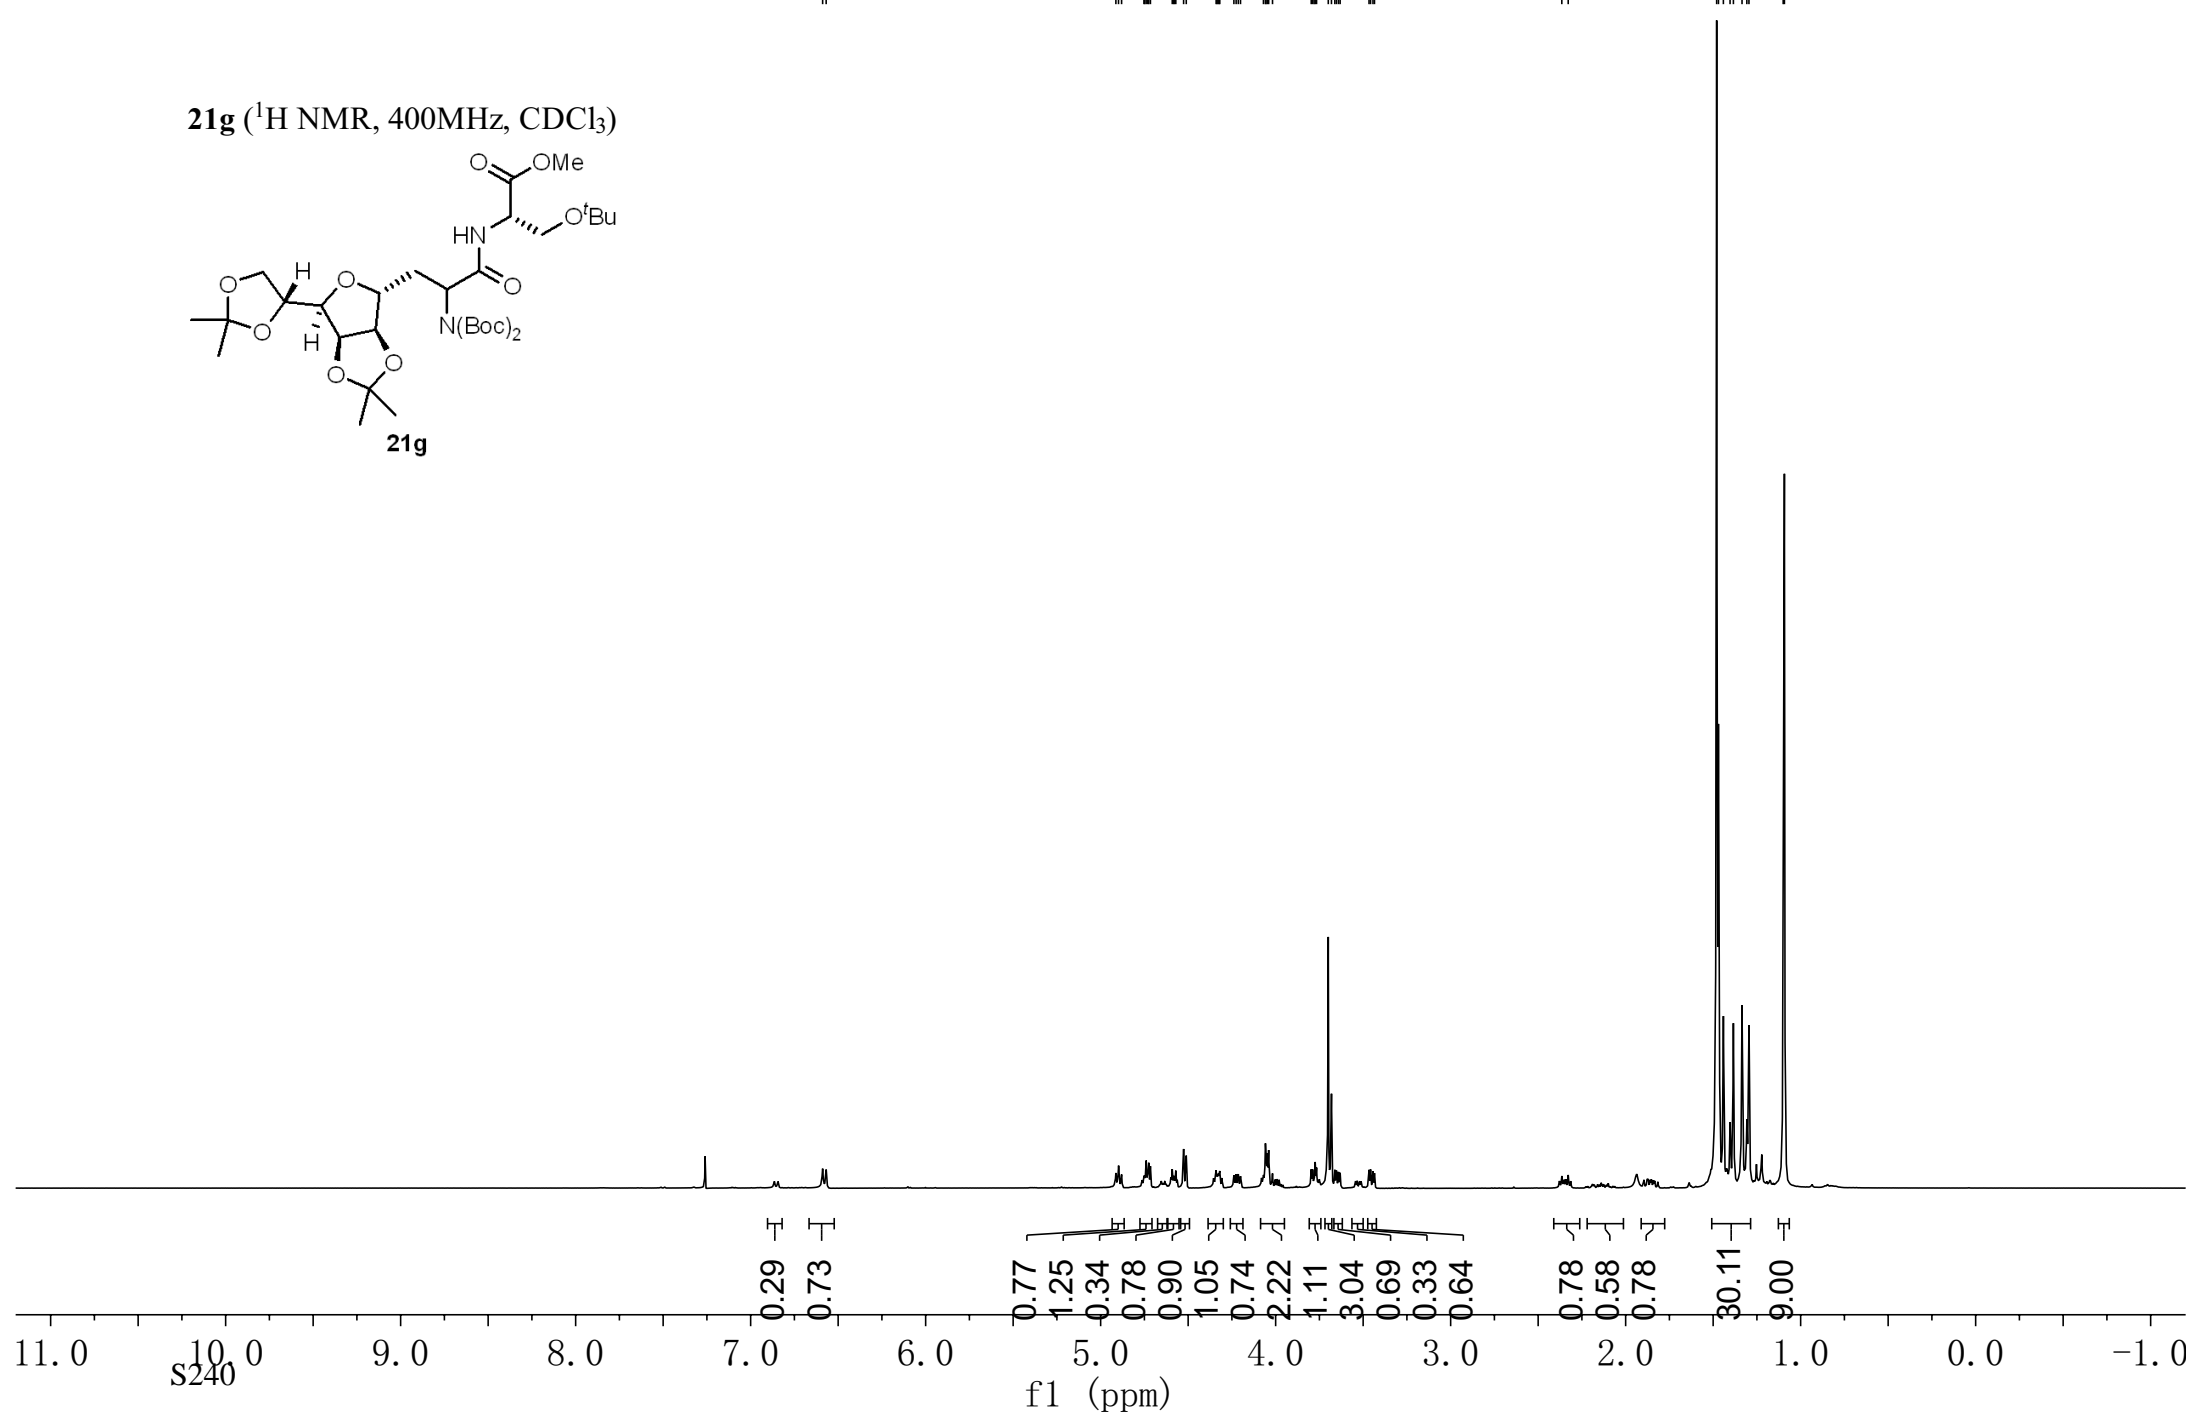

**21g** (<sup>13</sup>C NMR, 101MHz, CDCl<sub>3</sub>)

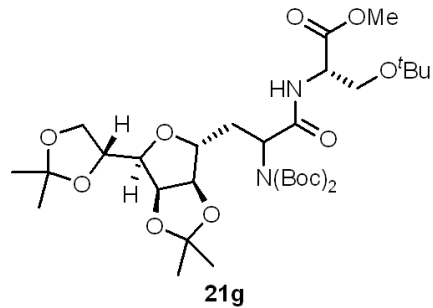

170.86  
170.68  
170.13  
169.94  
152.44  
152.01

112.68  
112.62  
109.34  
109.23  
85.53  
85.45  
83.71  
83.55  
82.74  
80.85  
80.75  
80.70  
80.45  
80.09  
77.16  
73.57  
73.48  
73.35  
73.33  
67.26  
67.23  
62.10  
61.83  
56.97  
56.64  
53.06  
53.00  
52.42  
52.29  
30.49  
29.51  
28.04  
27.98  
27.35  
27.02  
26.21  
26.18  
25.30  
25.28  
24.88  
24.82

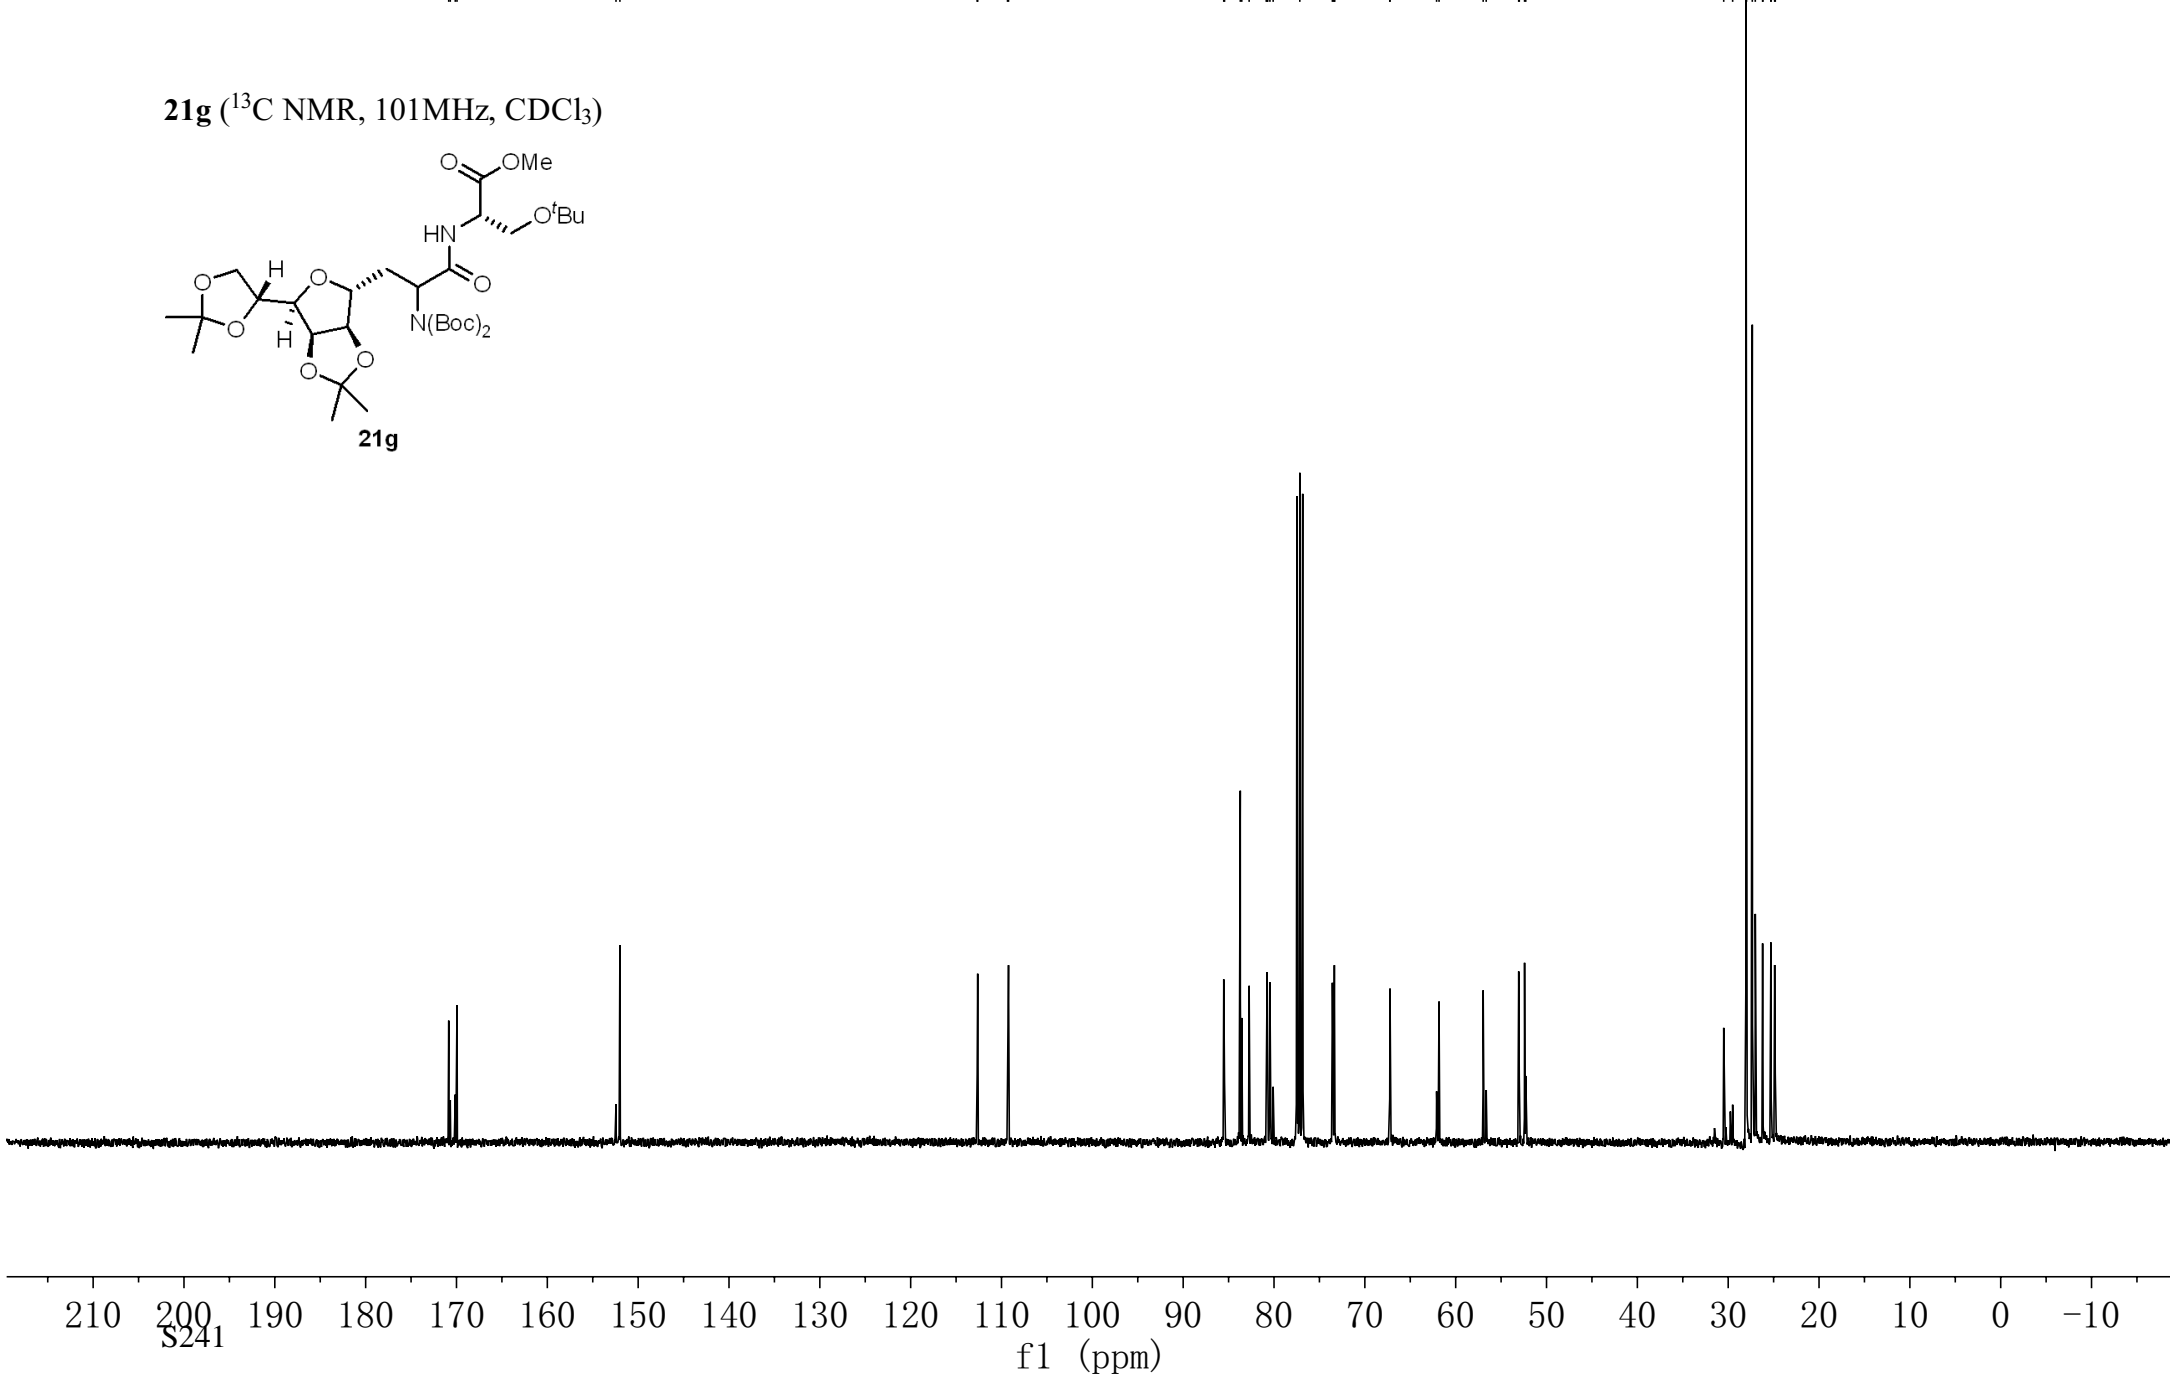

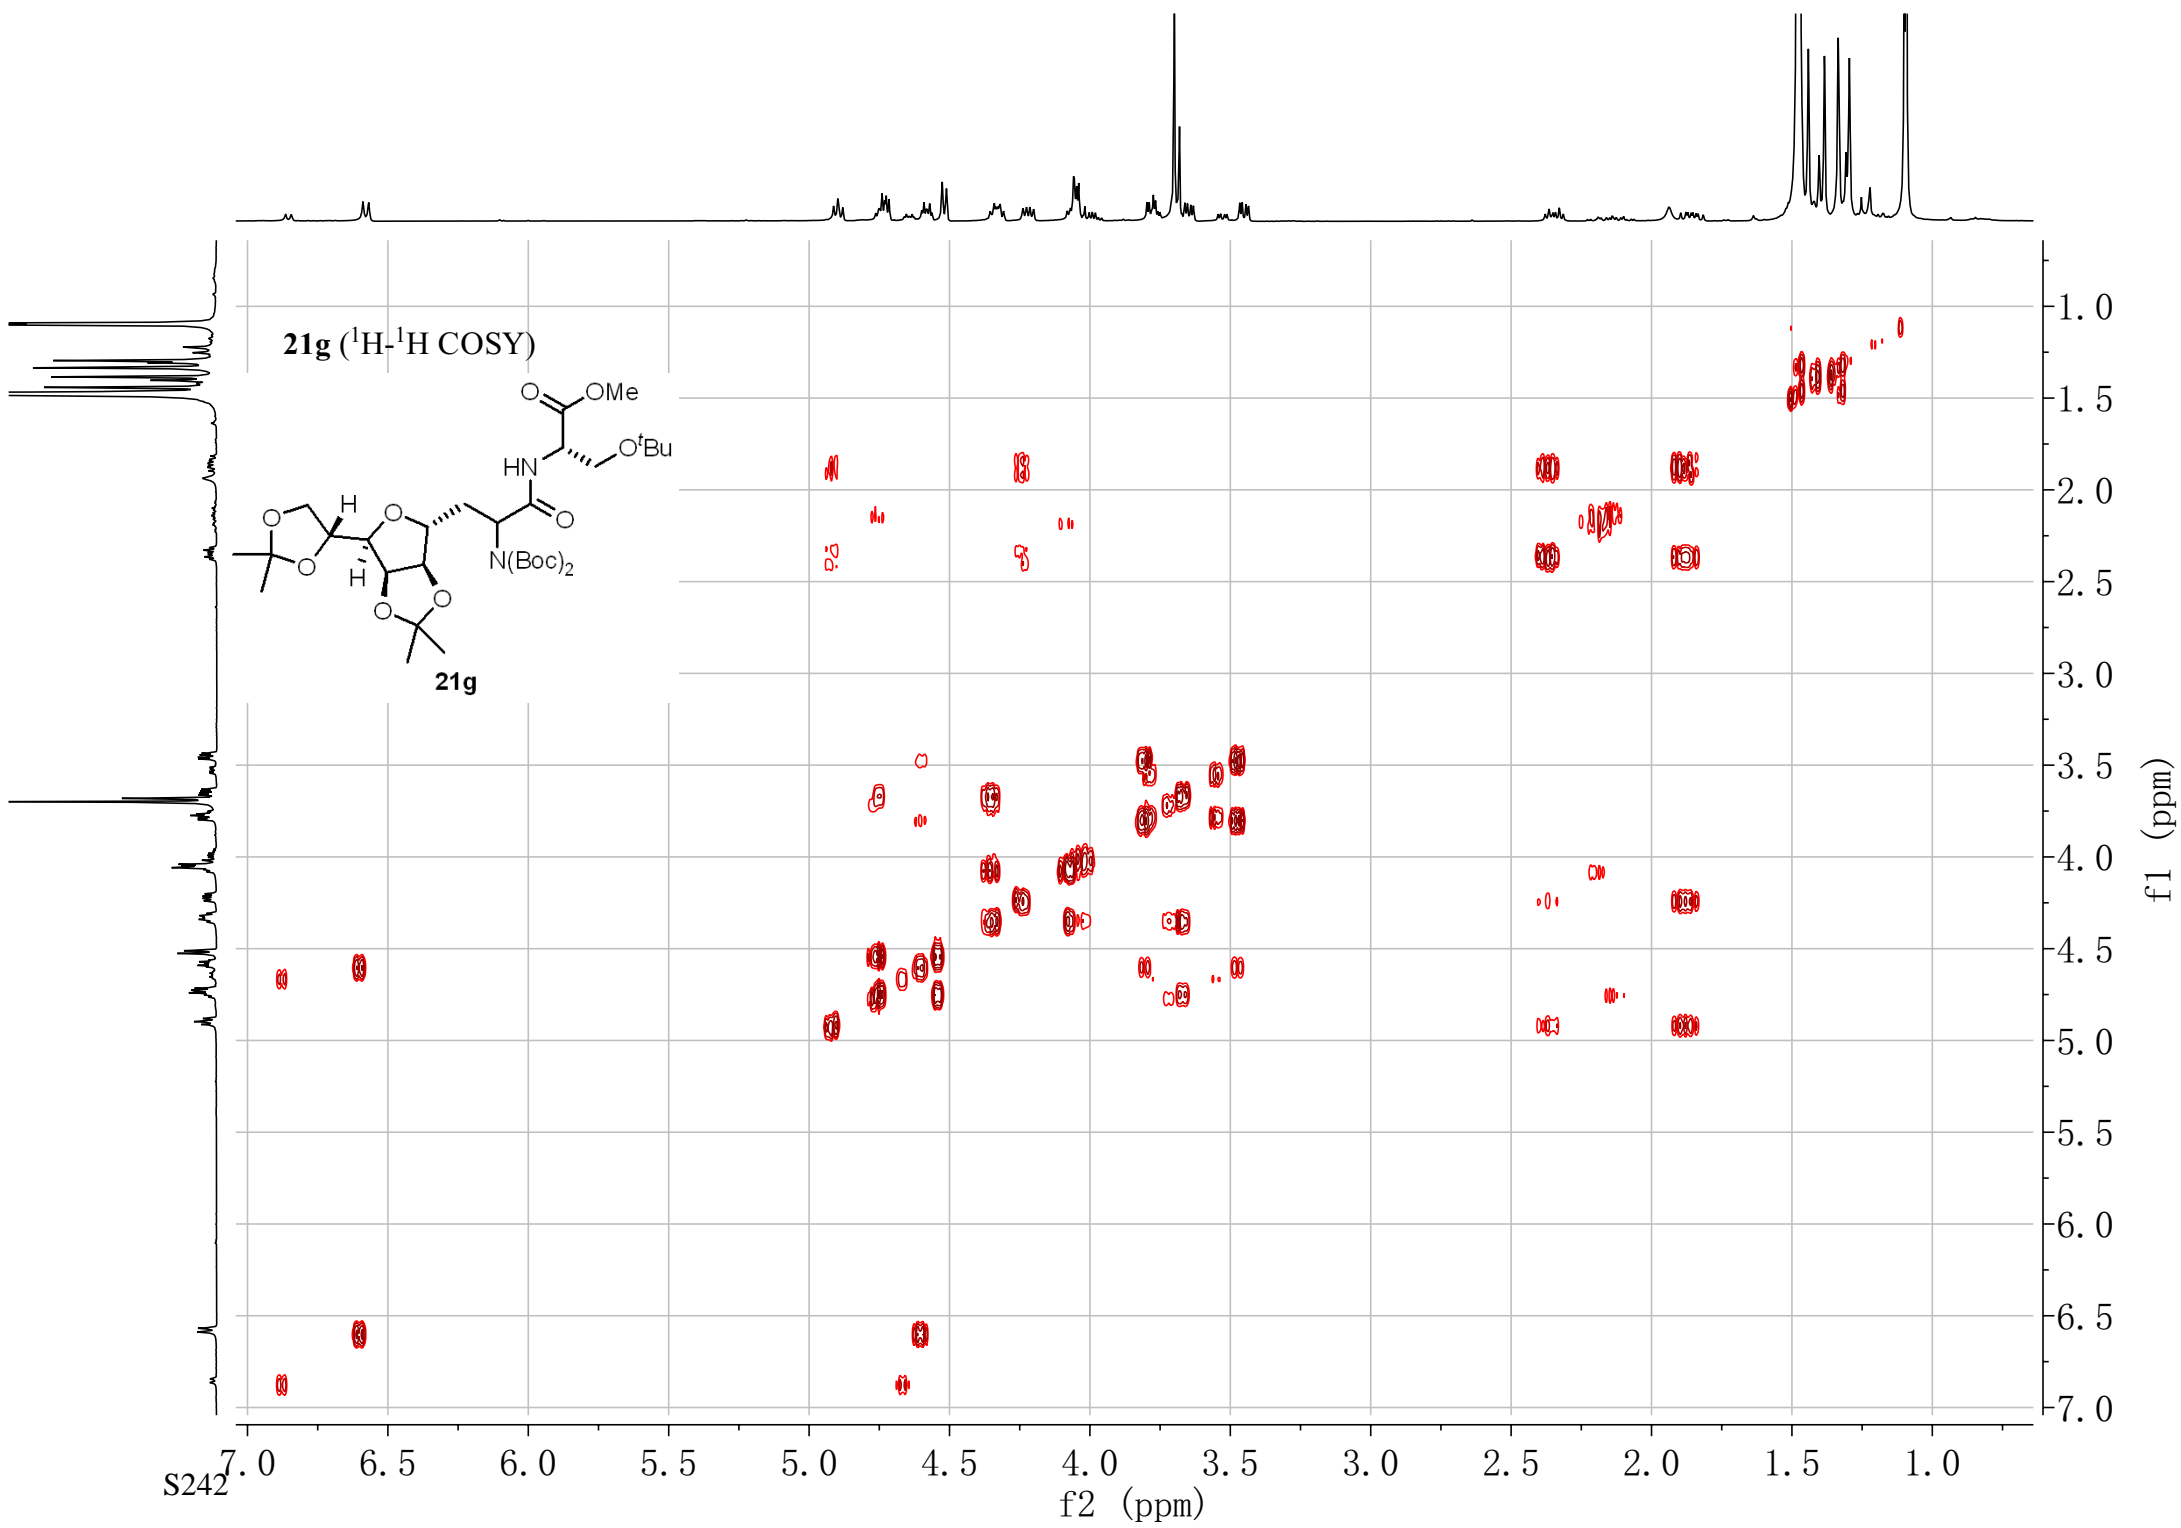

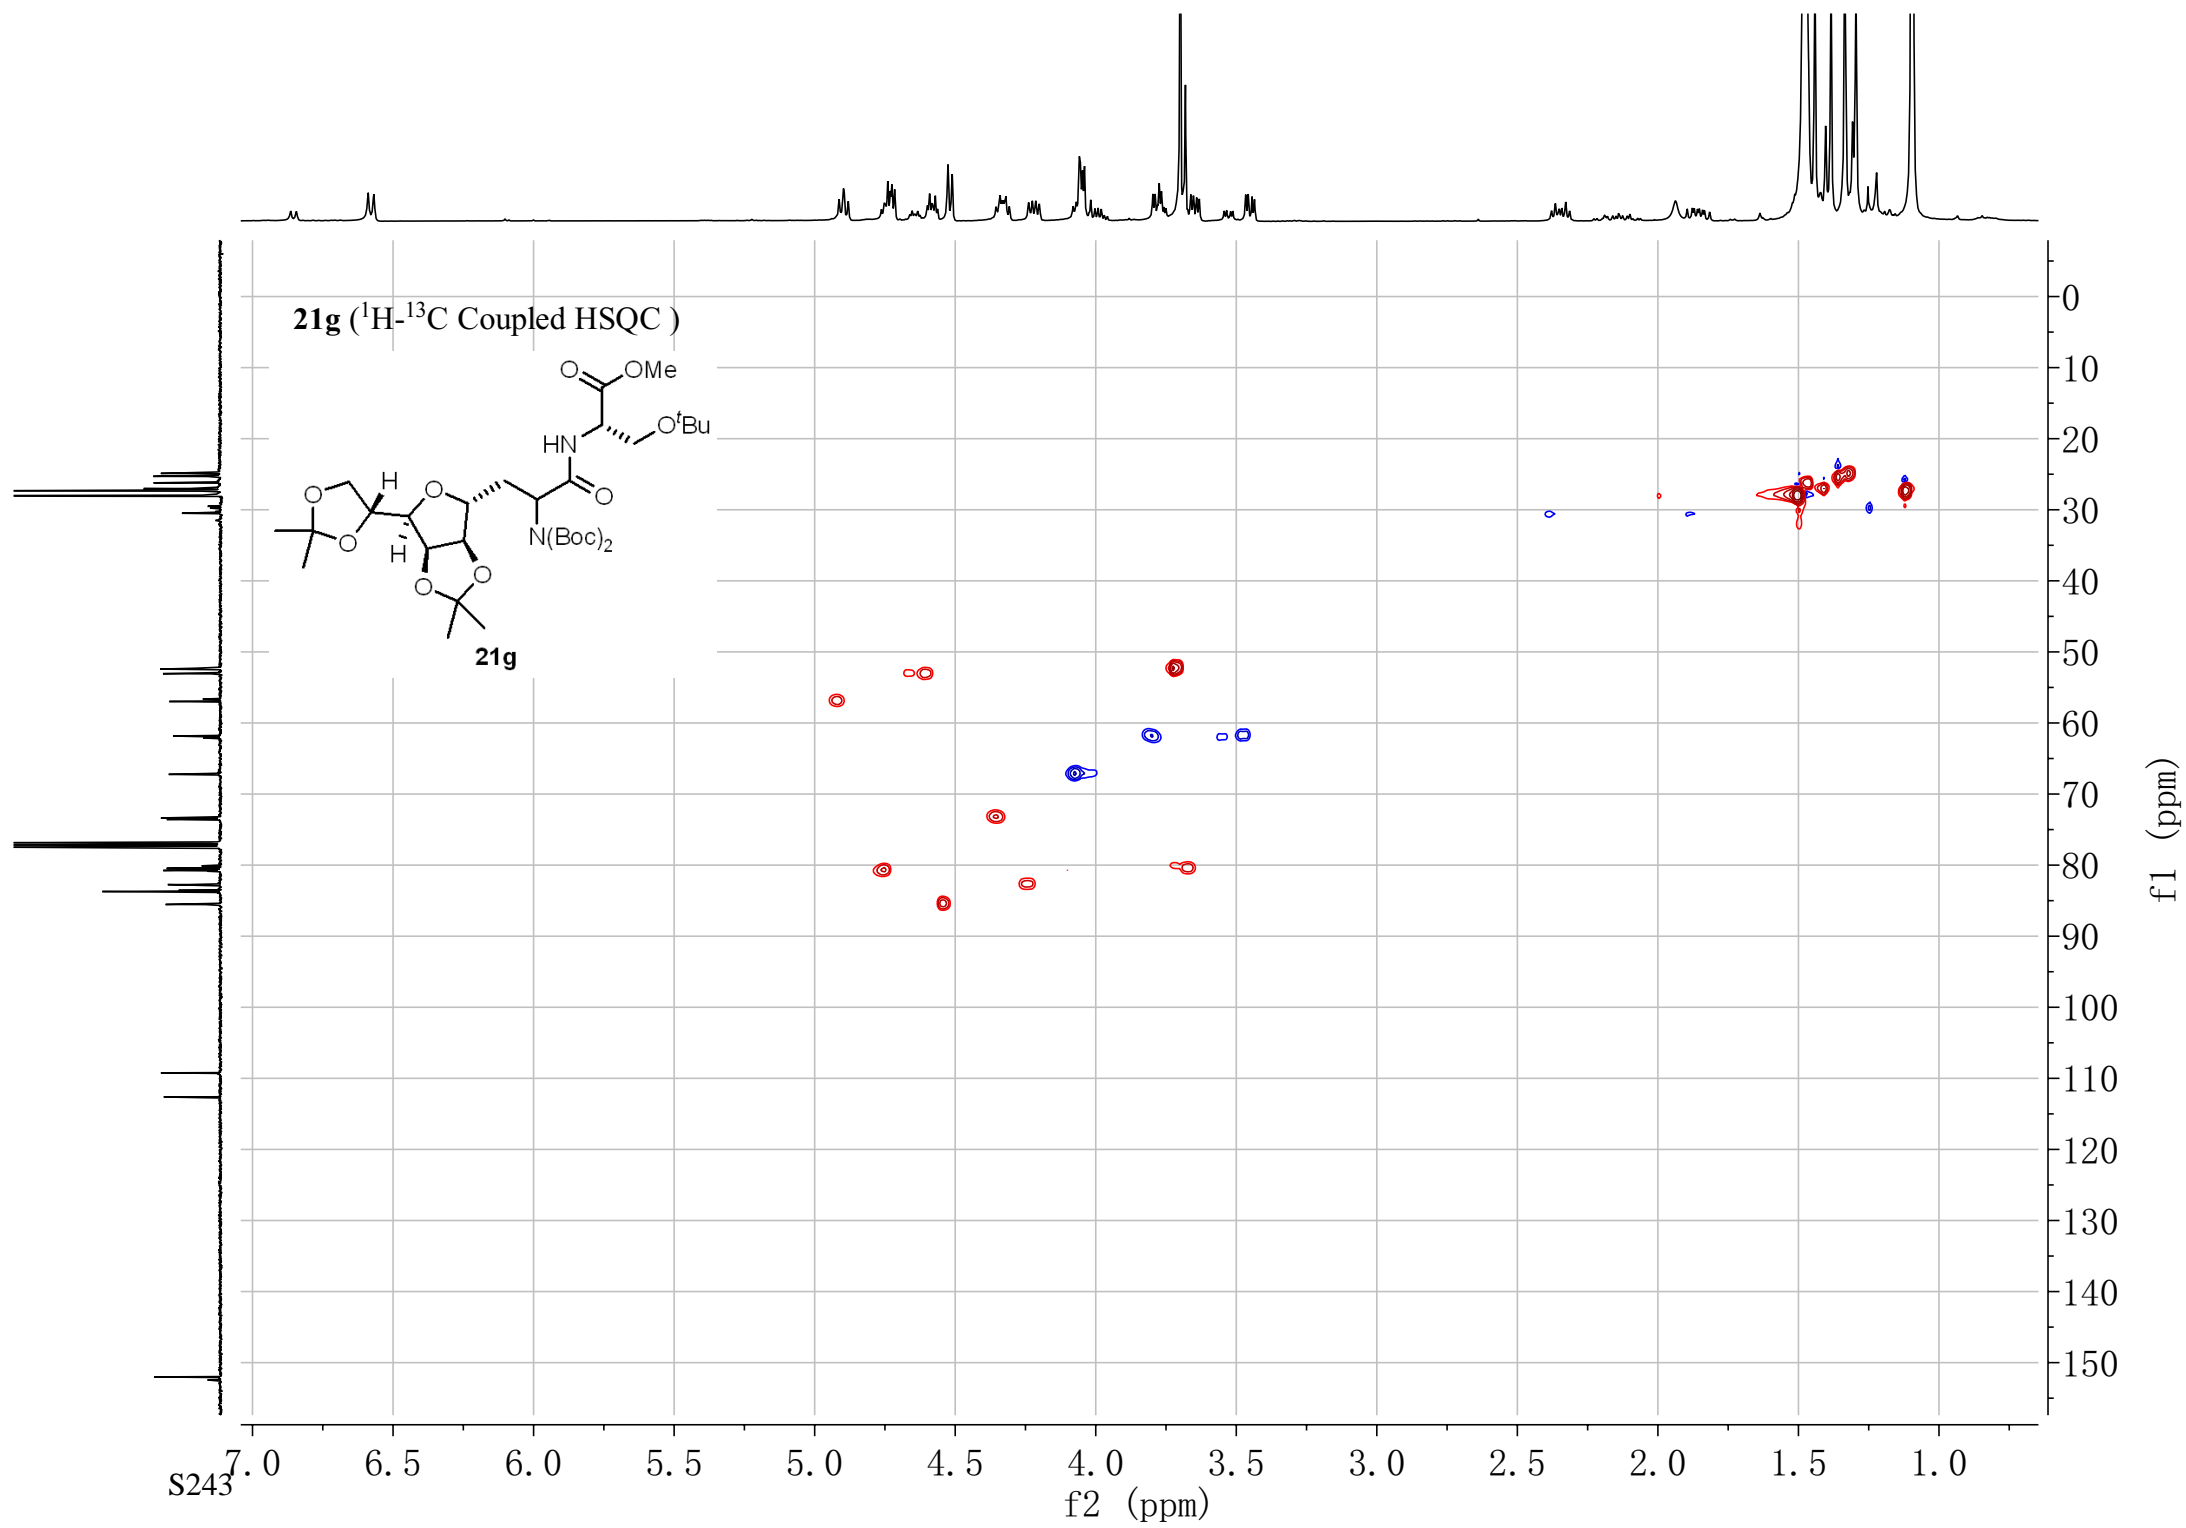

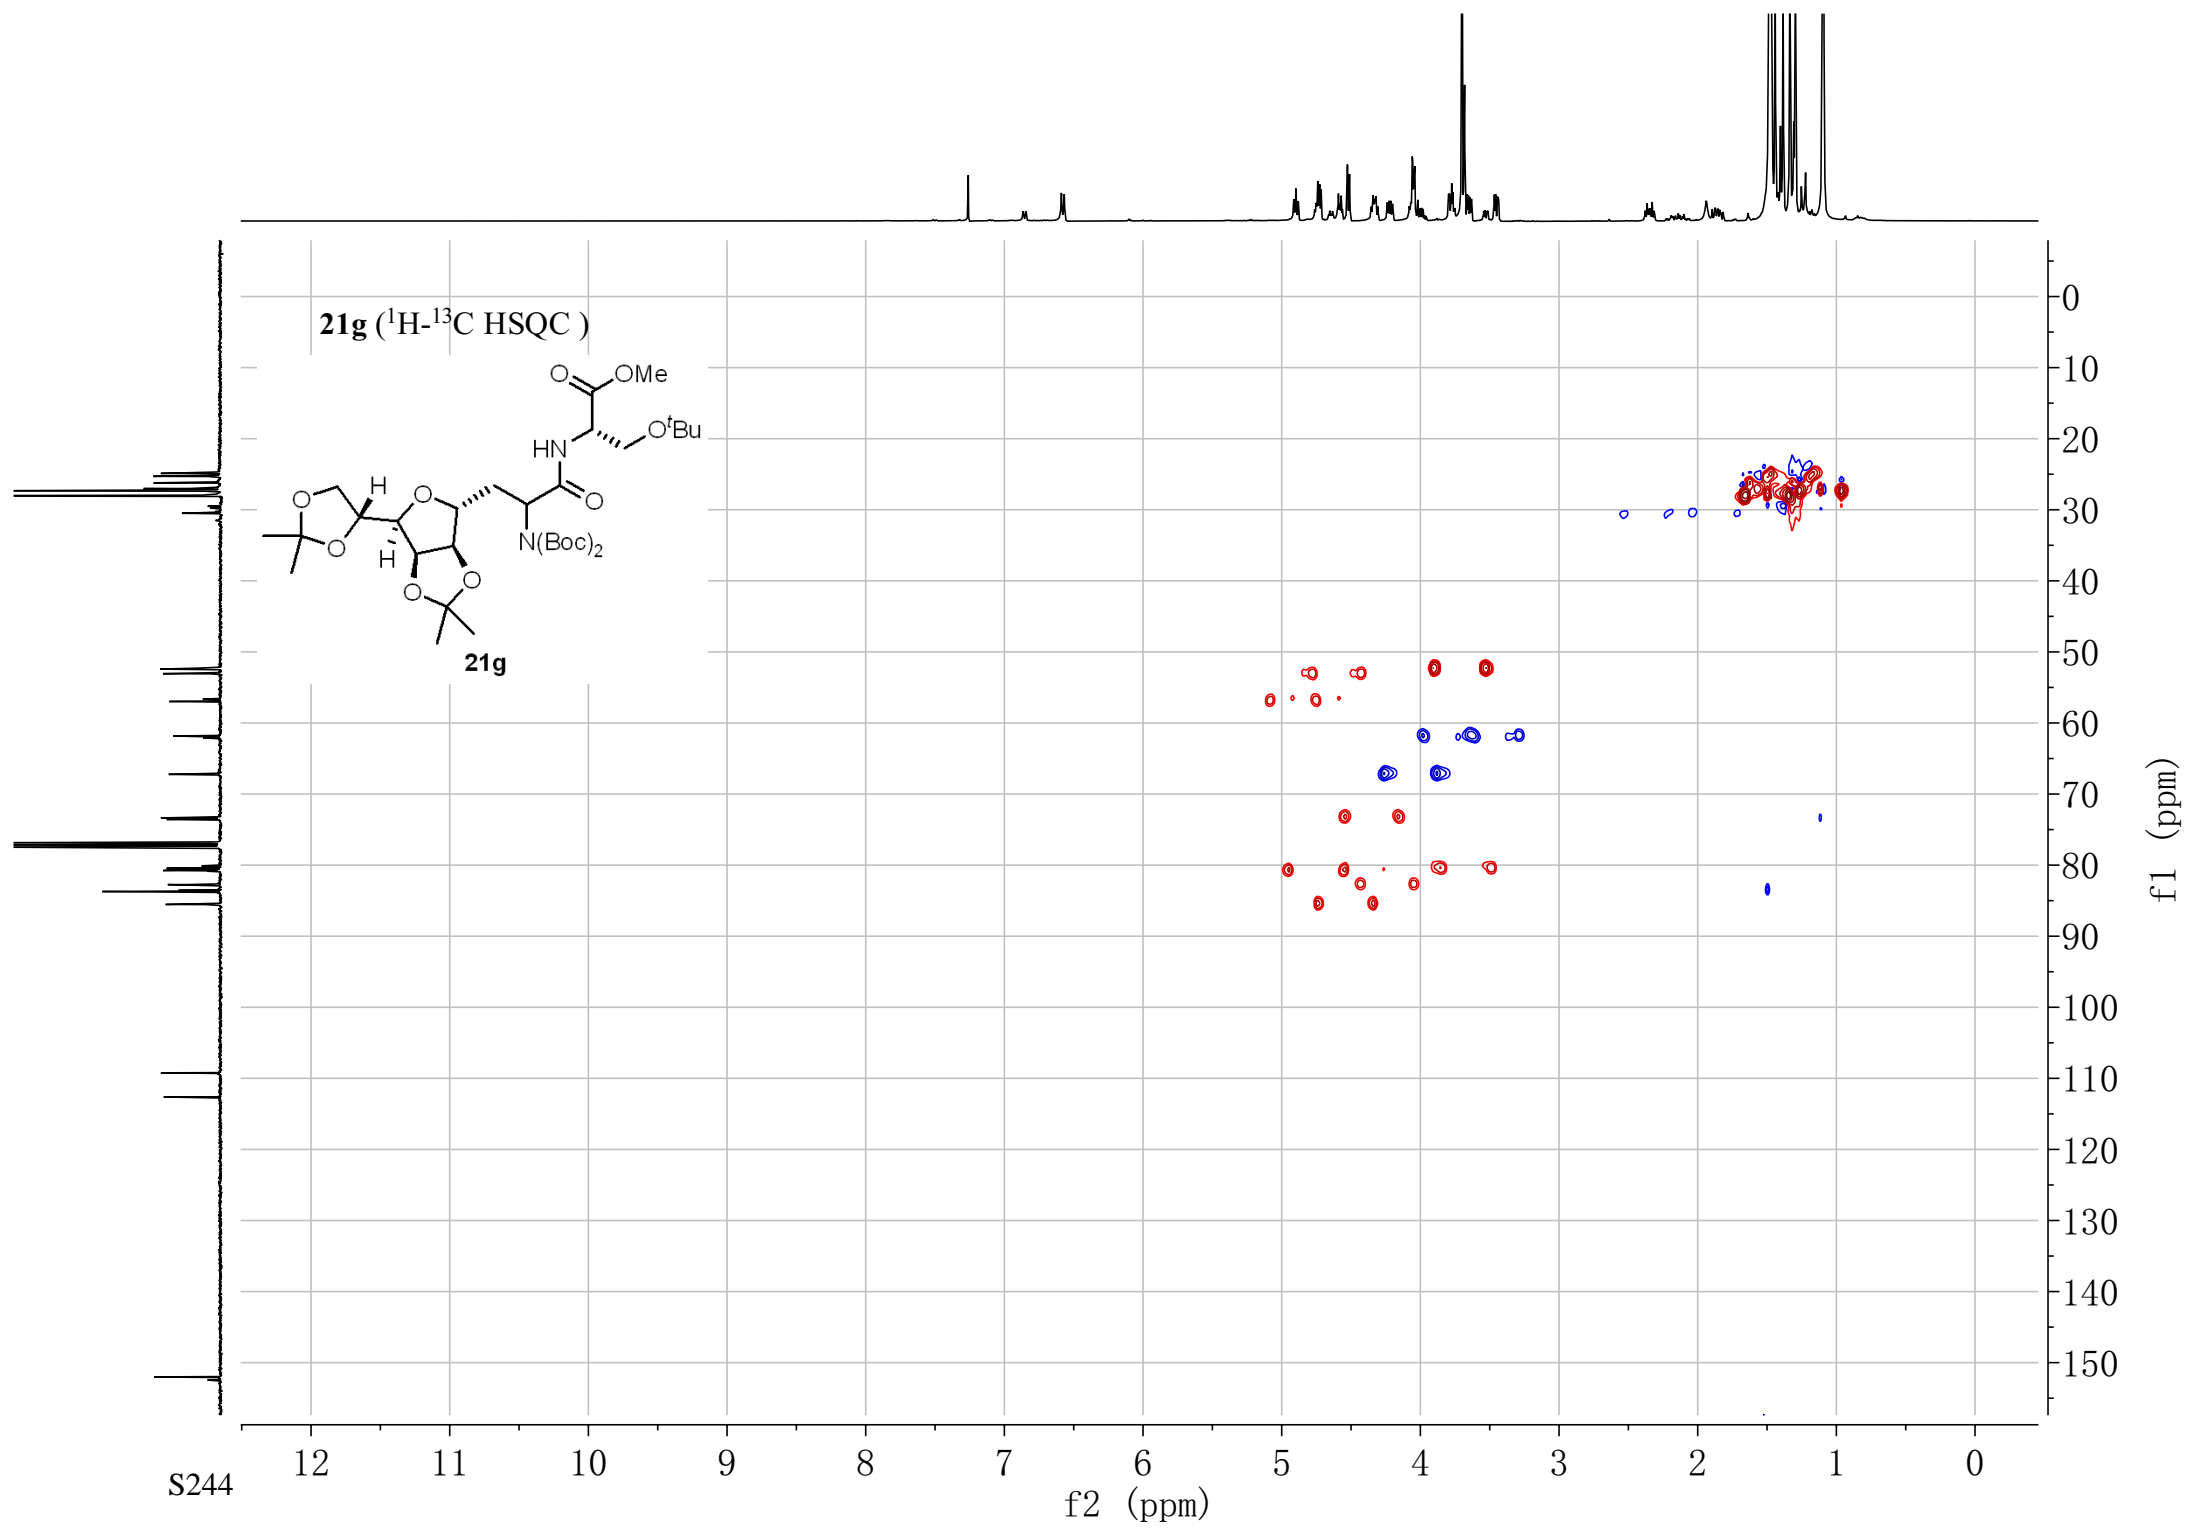

7.26  
6.62  
4.94  
4.79  
4.78  
4.77  
4.76  
4.75  
4.75  
4.74  
4.55  
4.54  
4.36  
4.36  
4.35  
4.34  
4.34  
4.33  
4.13  
4.12  
4.11  
4.10  
4.10  
4.09  
4.08  
4.08  
4.07  
4.06  
4.06  
4.05  
4.04  
4.04  
4.02  
4.01  
4.00  
3.99  
3.99  
3.98  
3.97  
3.77  
3.76  
3.75  
3.75  
3.74  
3.68  
2.09  
1.50  
1.49  
1.42  
1.41  
1.36  
1.35  
1.33  
1.32  
1.28  
1.25  
1.25  
1.15  
1.13

**21h** (<sup>1</sup>H NMR, 400MHz, CDCl<sub>3</sub>)

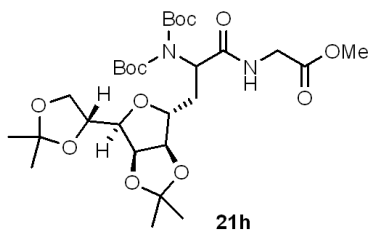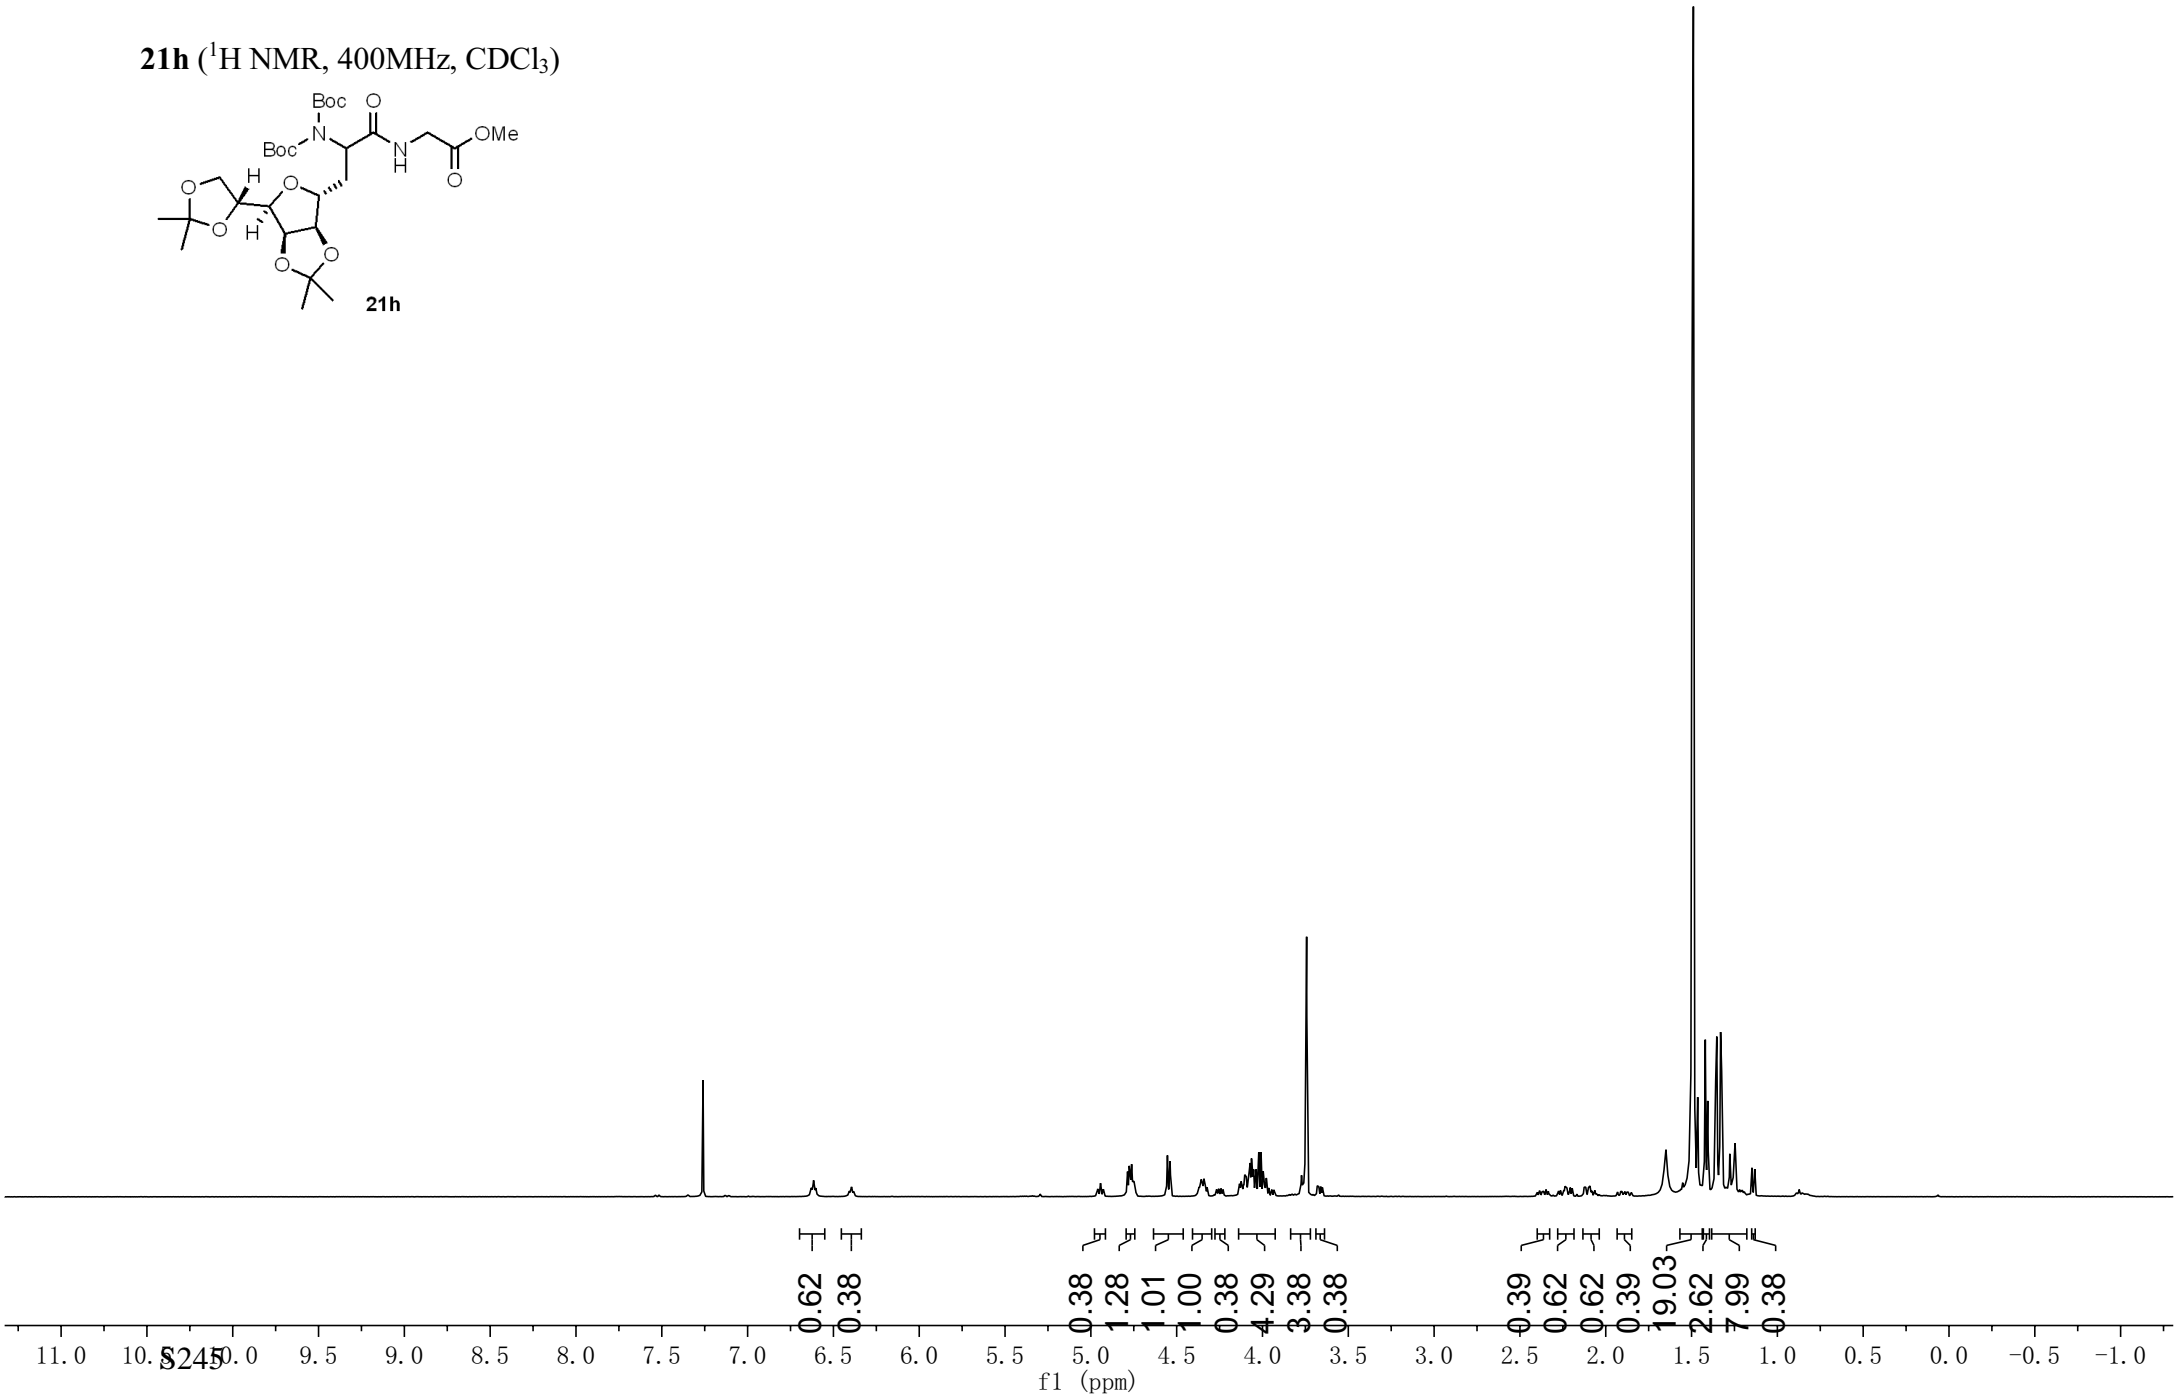



**21h** ( $^{13}\text{C}$  NMR, 101MHz,  $\text{CDCl}_3$ )

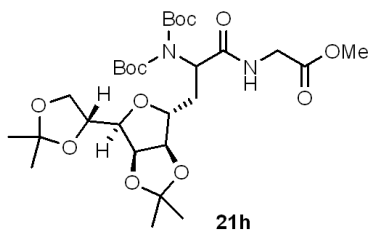

170.62  
170.21

152.63  
152.17

112.82  
112.76  
109.31  
85.67  
85.49  
84.06  
83.79  
82.85  
81.14  
80.88  
80.83  
80.53  
80.02  
77.48  
77.16  
76.84  
73.44  
67.25  
67.13  
56.98  
56.81  
52.51  
52.46  
41.51  
41.48  
30.76  
30.19  
28.07  
28.05  
27.09  
27.02  
26.30  
26.23  
25.35  
25.01  
24.88

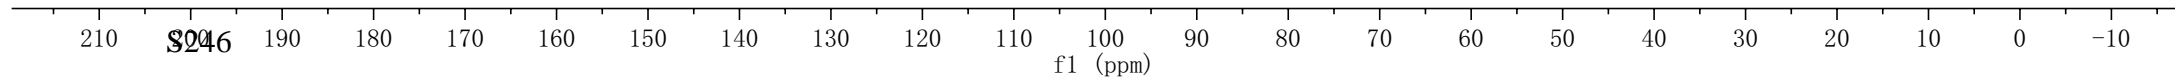

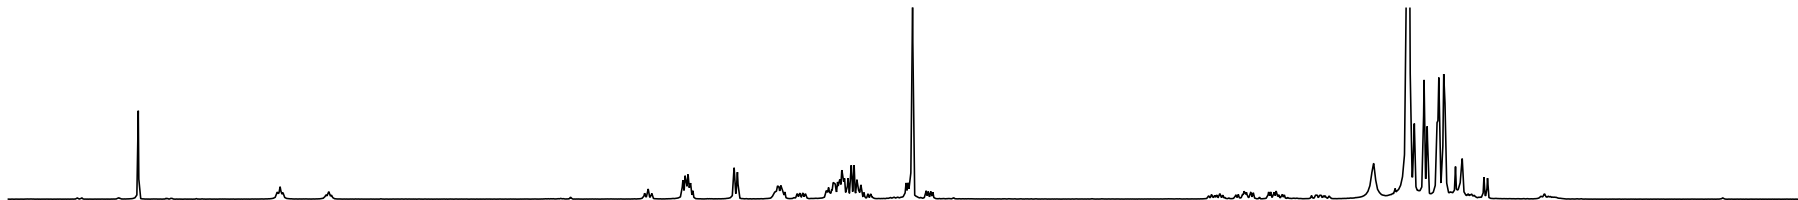

**21h** ( $^1\text{H} - ^1\text{H}$  COSY)

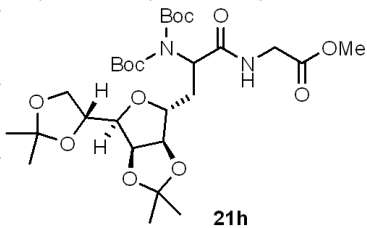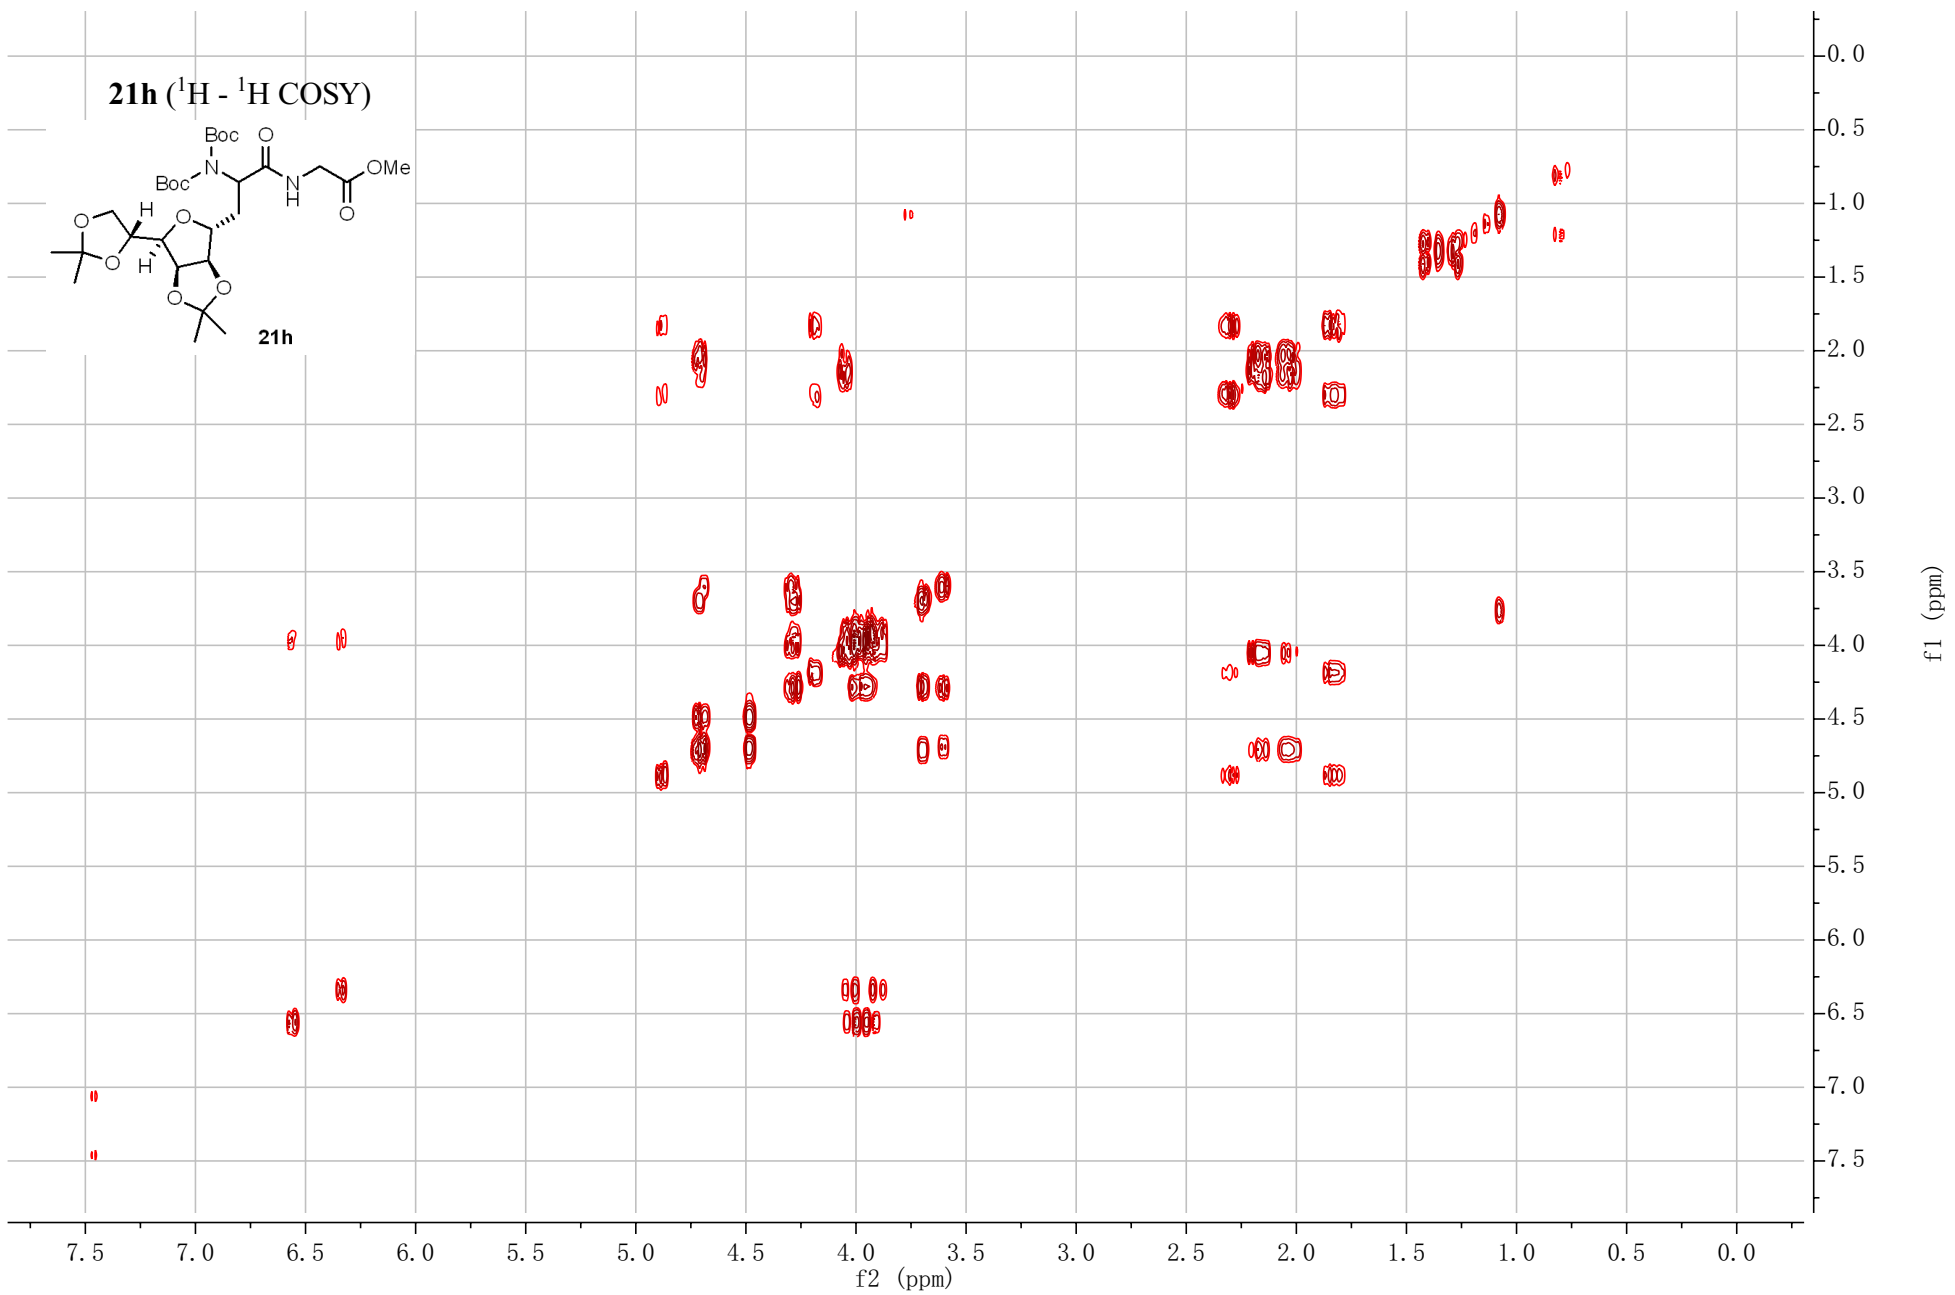

S247

f2 (ppm)

f1 (ppm)

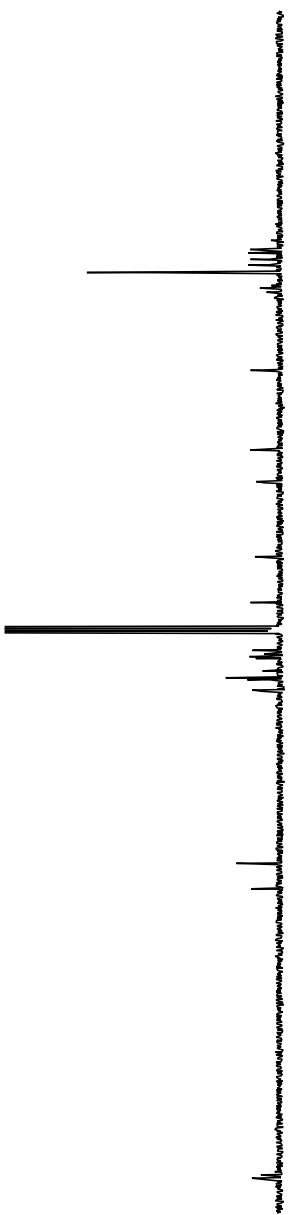

**21h** ( $^1\text{H} - ^{13}\text{C}$  Coupled HSQC)

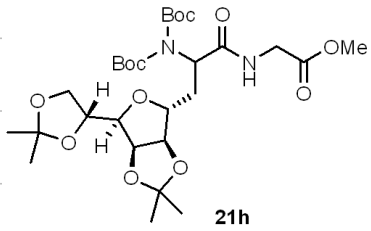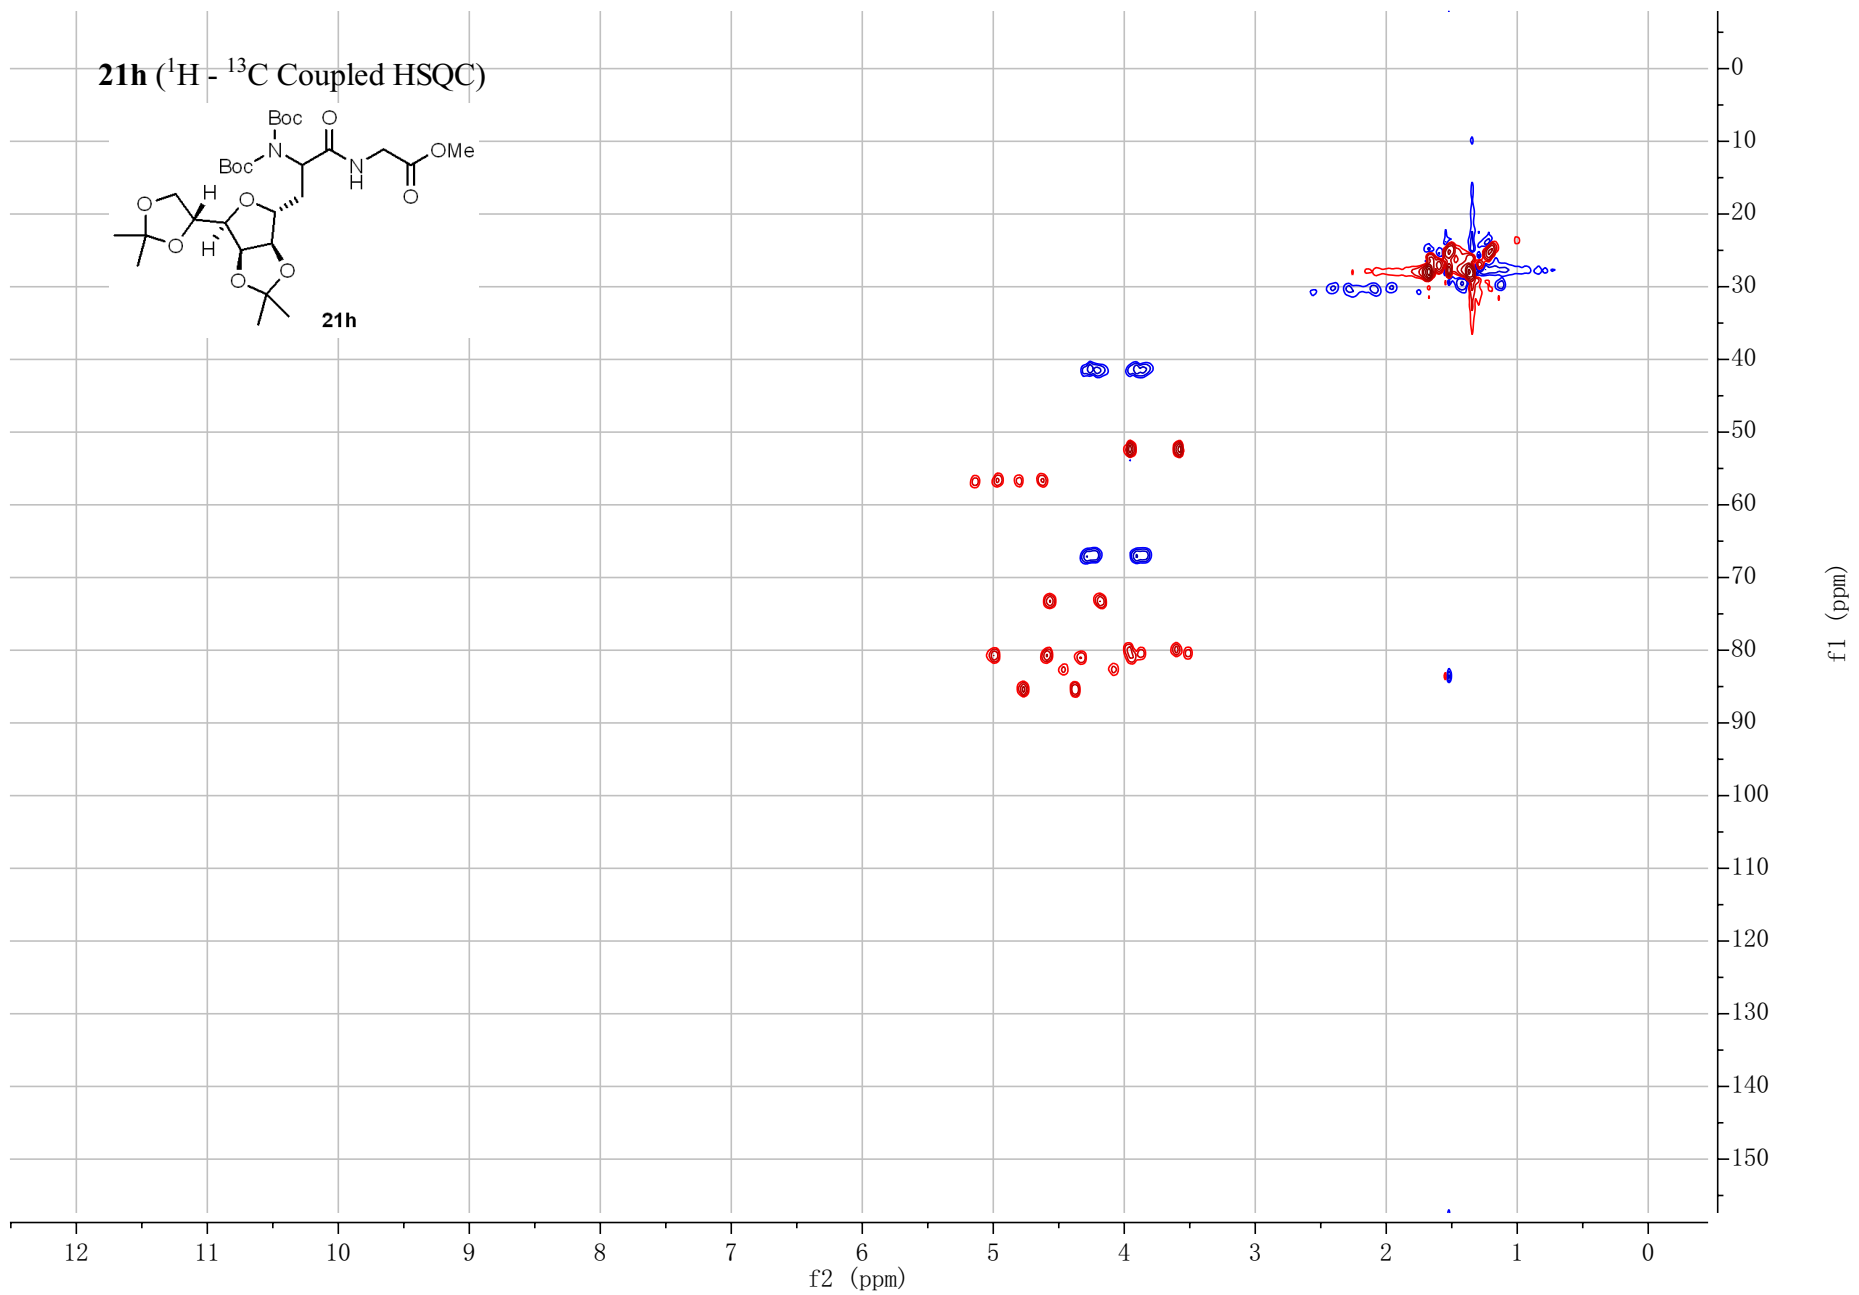

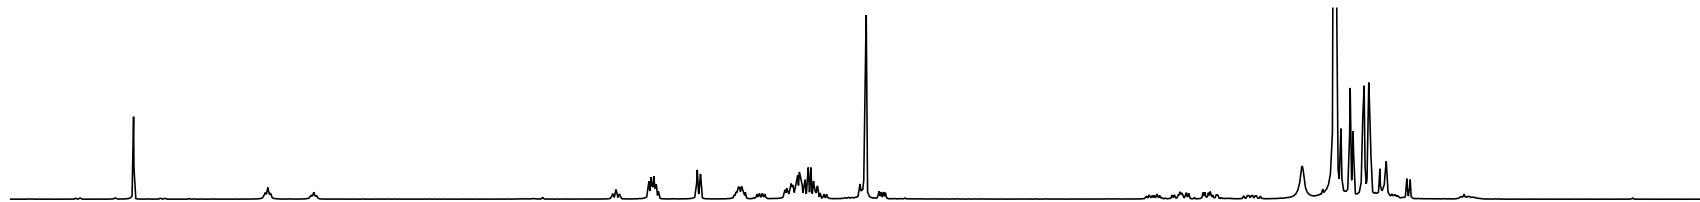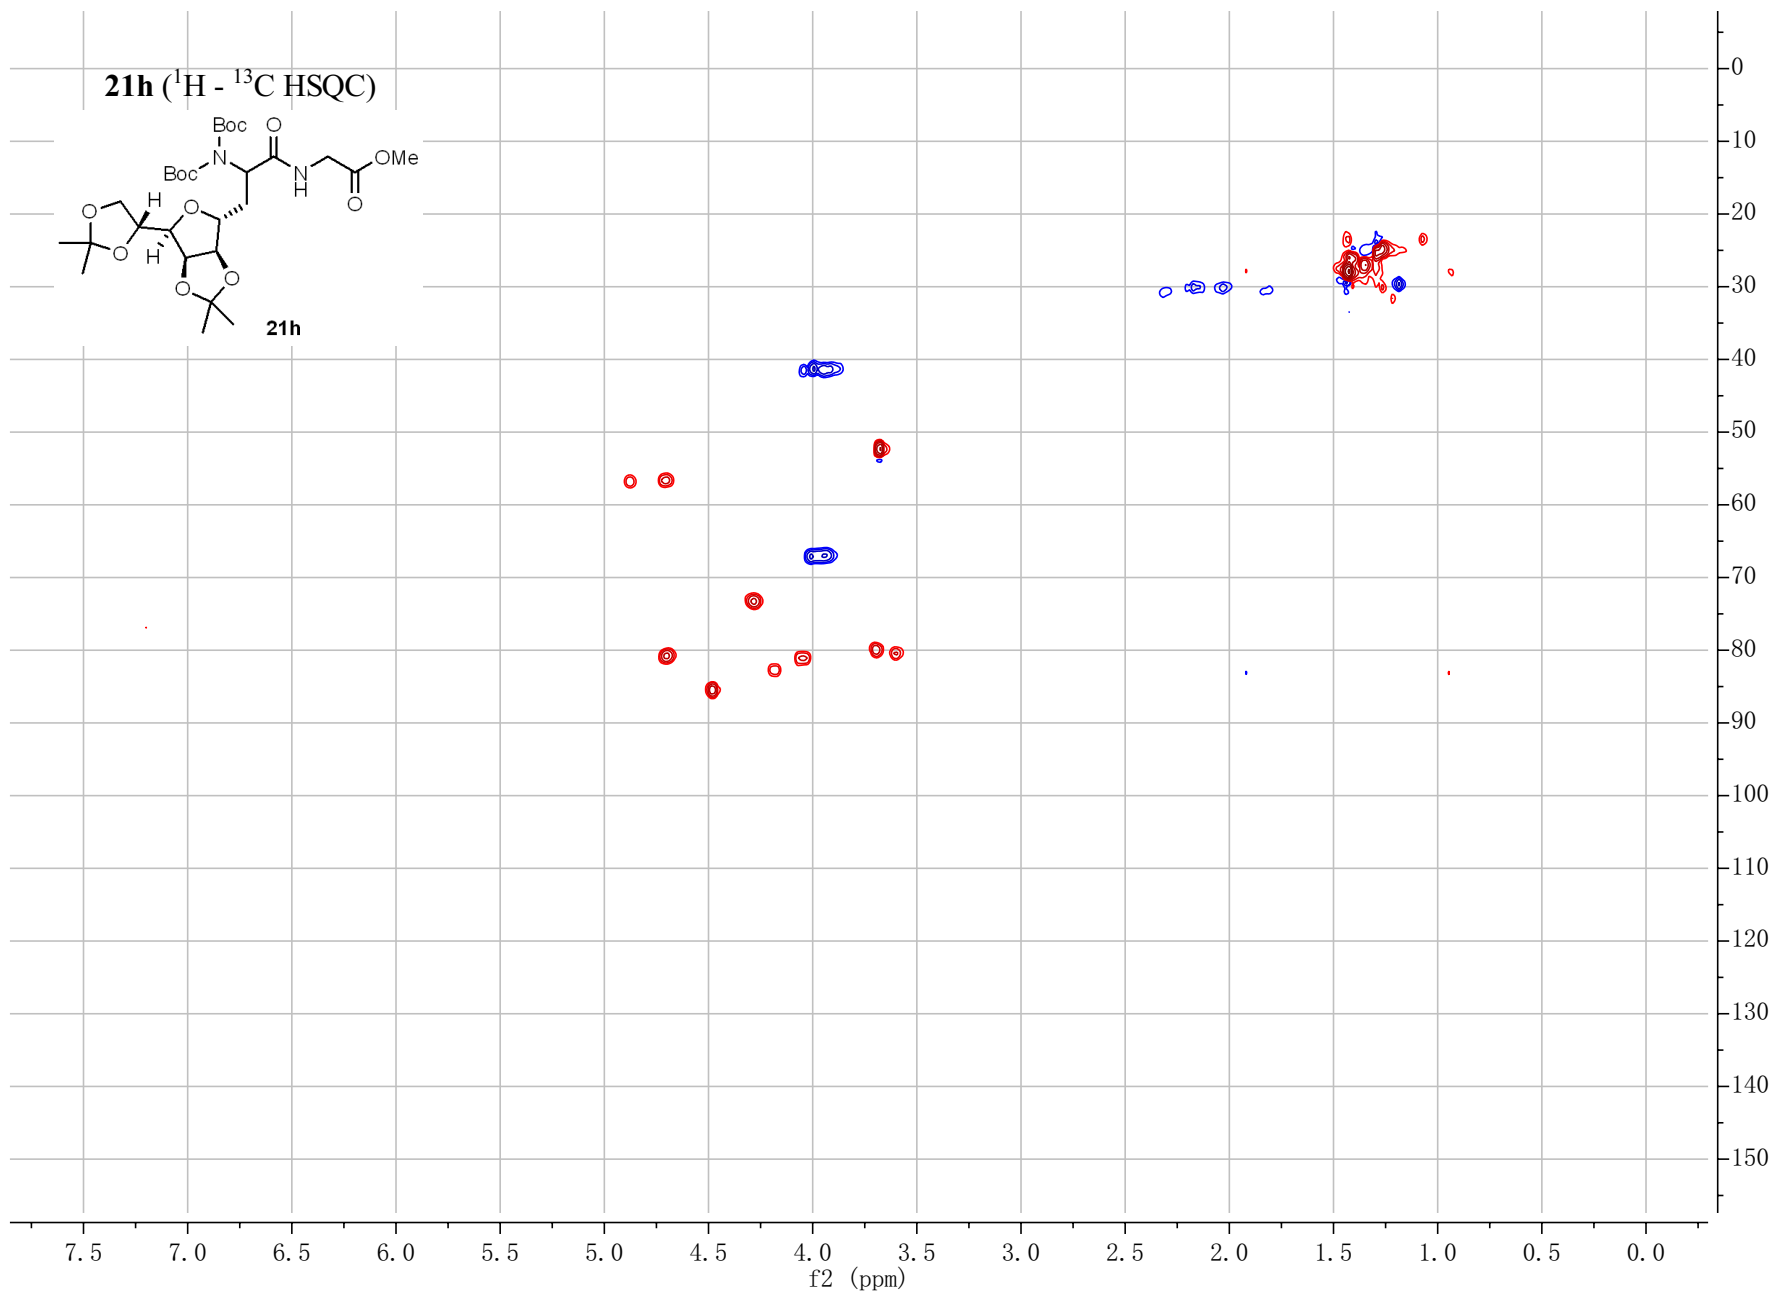

S249

7.01 6.99 4.89 4.82 4.81 4.80 4.79 4.78 4.77 4.77 4.76 4.73 4.72 4.70 4.69 4.54 4.54 4.53 4.52 4.36 4.35 4.35 4.34 4.34 4.33 4.10 4.08 4.07 4.07 4.06 4.06 4.03 4.02 4.02 4.01 3.74 3.73 3.72 3.71 3.70 3.67 3.66 3.64 3.64 3.04 3.03 2.99 2.98 2.90 2.88 2.16 2.09 1.46 1.43 1.40 1.35 1.32 1.31

**21i** (<sup>1</sup>H NMR, 400MHz, CDCl<sub>3</sub>)

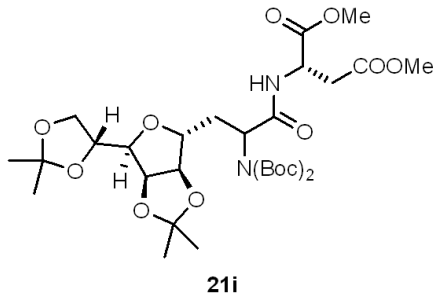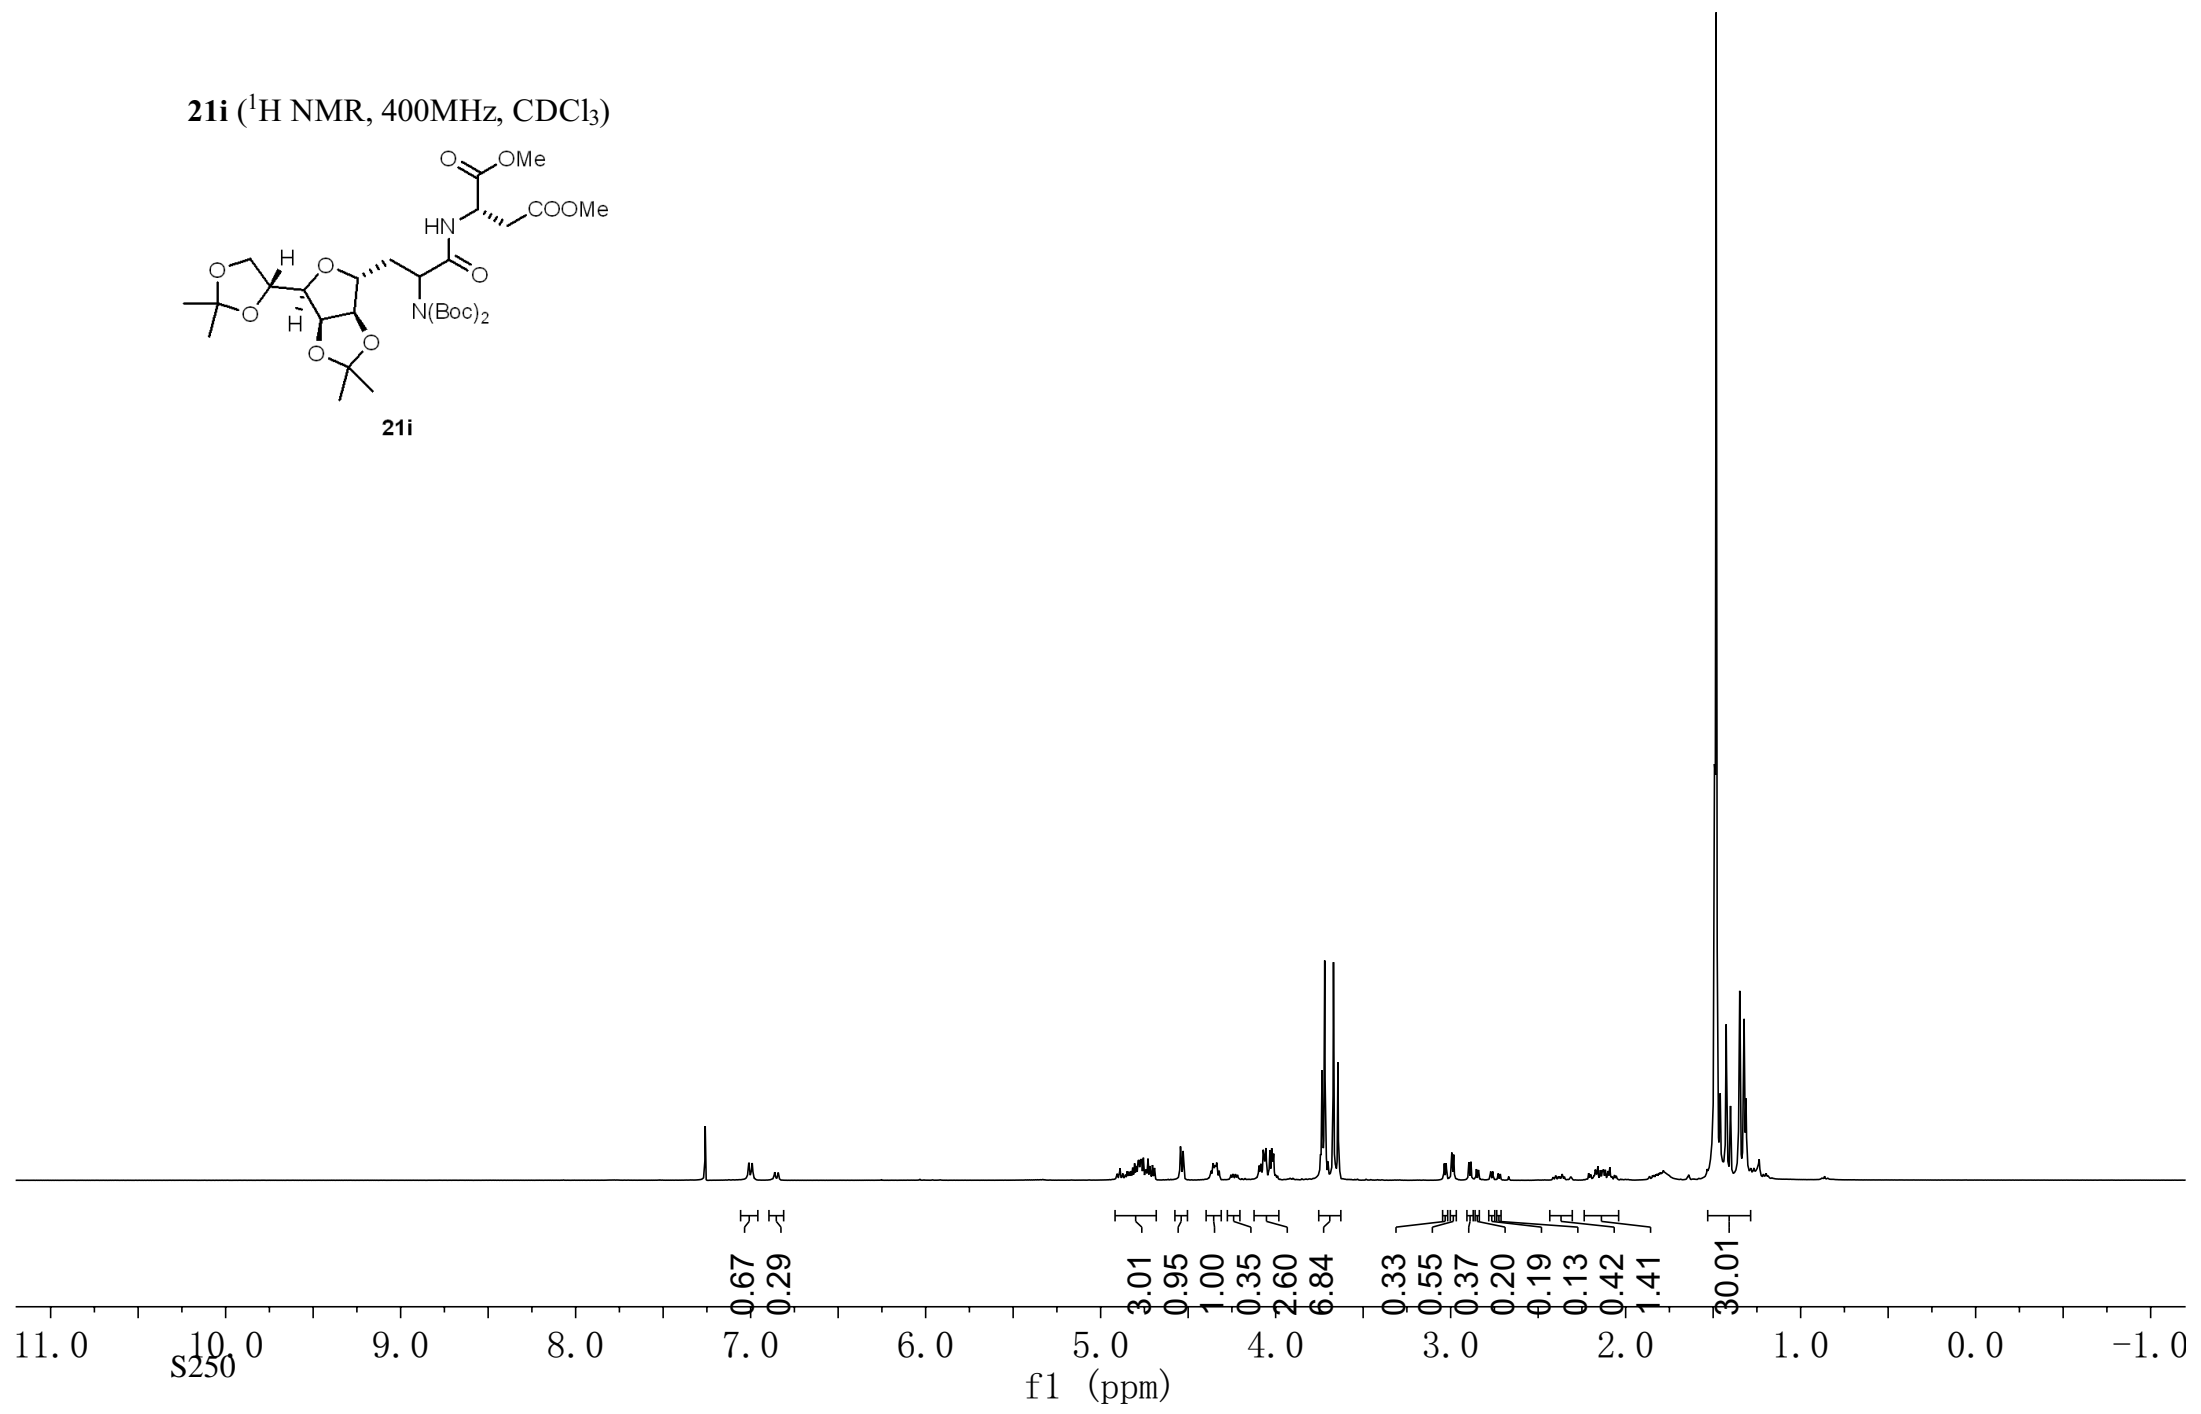

171.36  
171.33  
171.11  
170.98  
170.20  
169.81  
152.46  
152.10

112.75  
112.72  
109.38  
109.30  
85.58  
85.47  
84.01  
83.93  
83.70  
82.83  
80.87  
80.78  
80.73  
80.53  
80.09  
77.16  
73.39  
67.23

56.90  
56.58  
52.91  
52.82  
52.08  
52.02  
48.84  
48.67  
36.31  
36.06  
29.53  
28.03  
28.01  
27.09  
27.05  
26.26  
26.21  
25.30  
24.92  
24.83

**21i** ( $^{13}\text{C}$  NMR, 101MHz,  $\text{CDCl}_3$ )

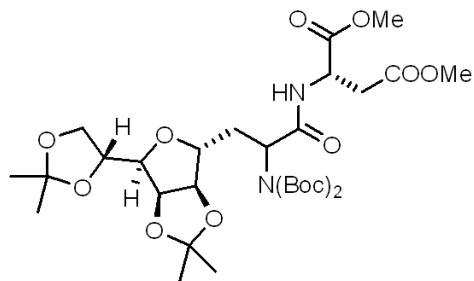

**21i**

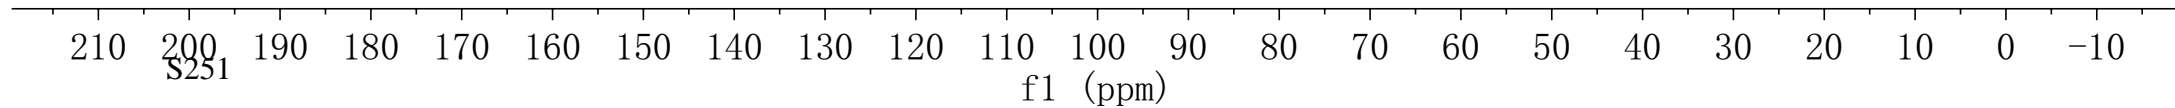

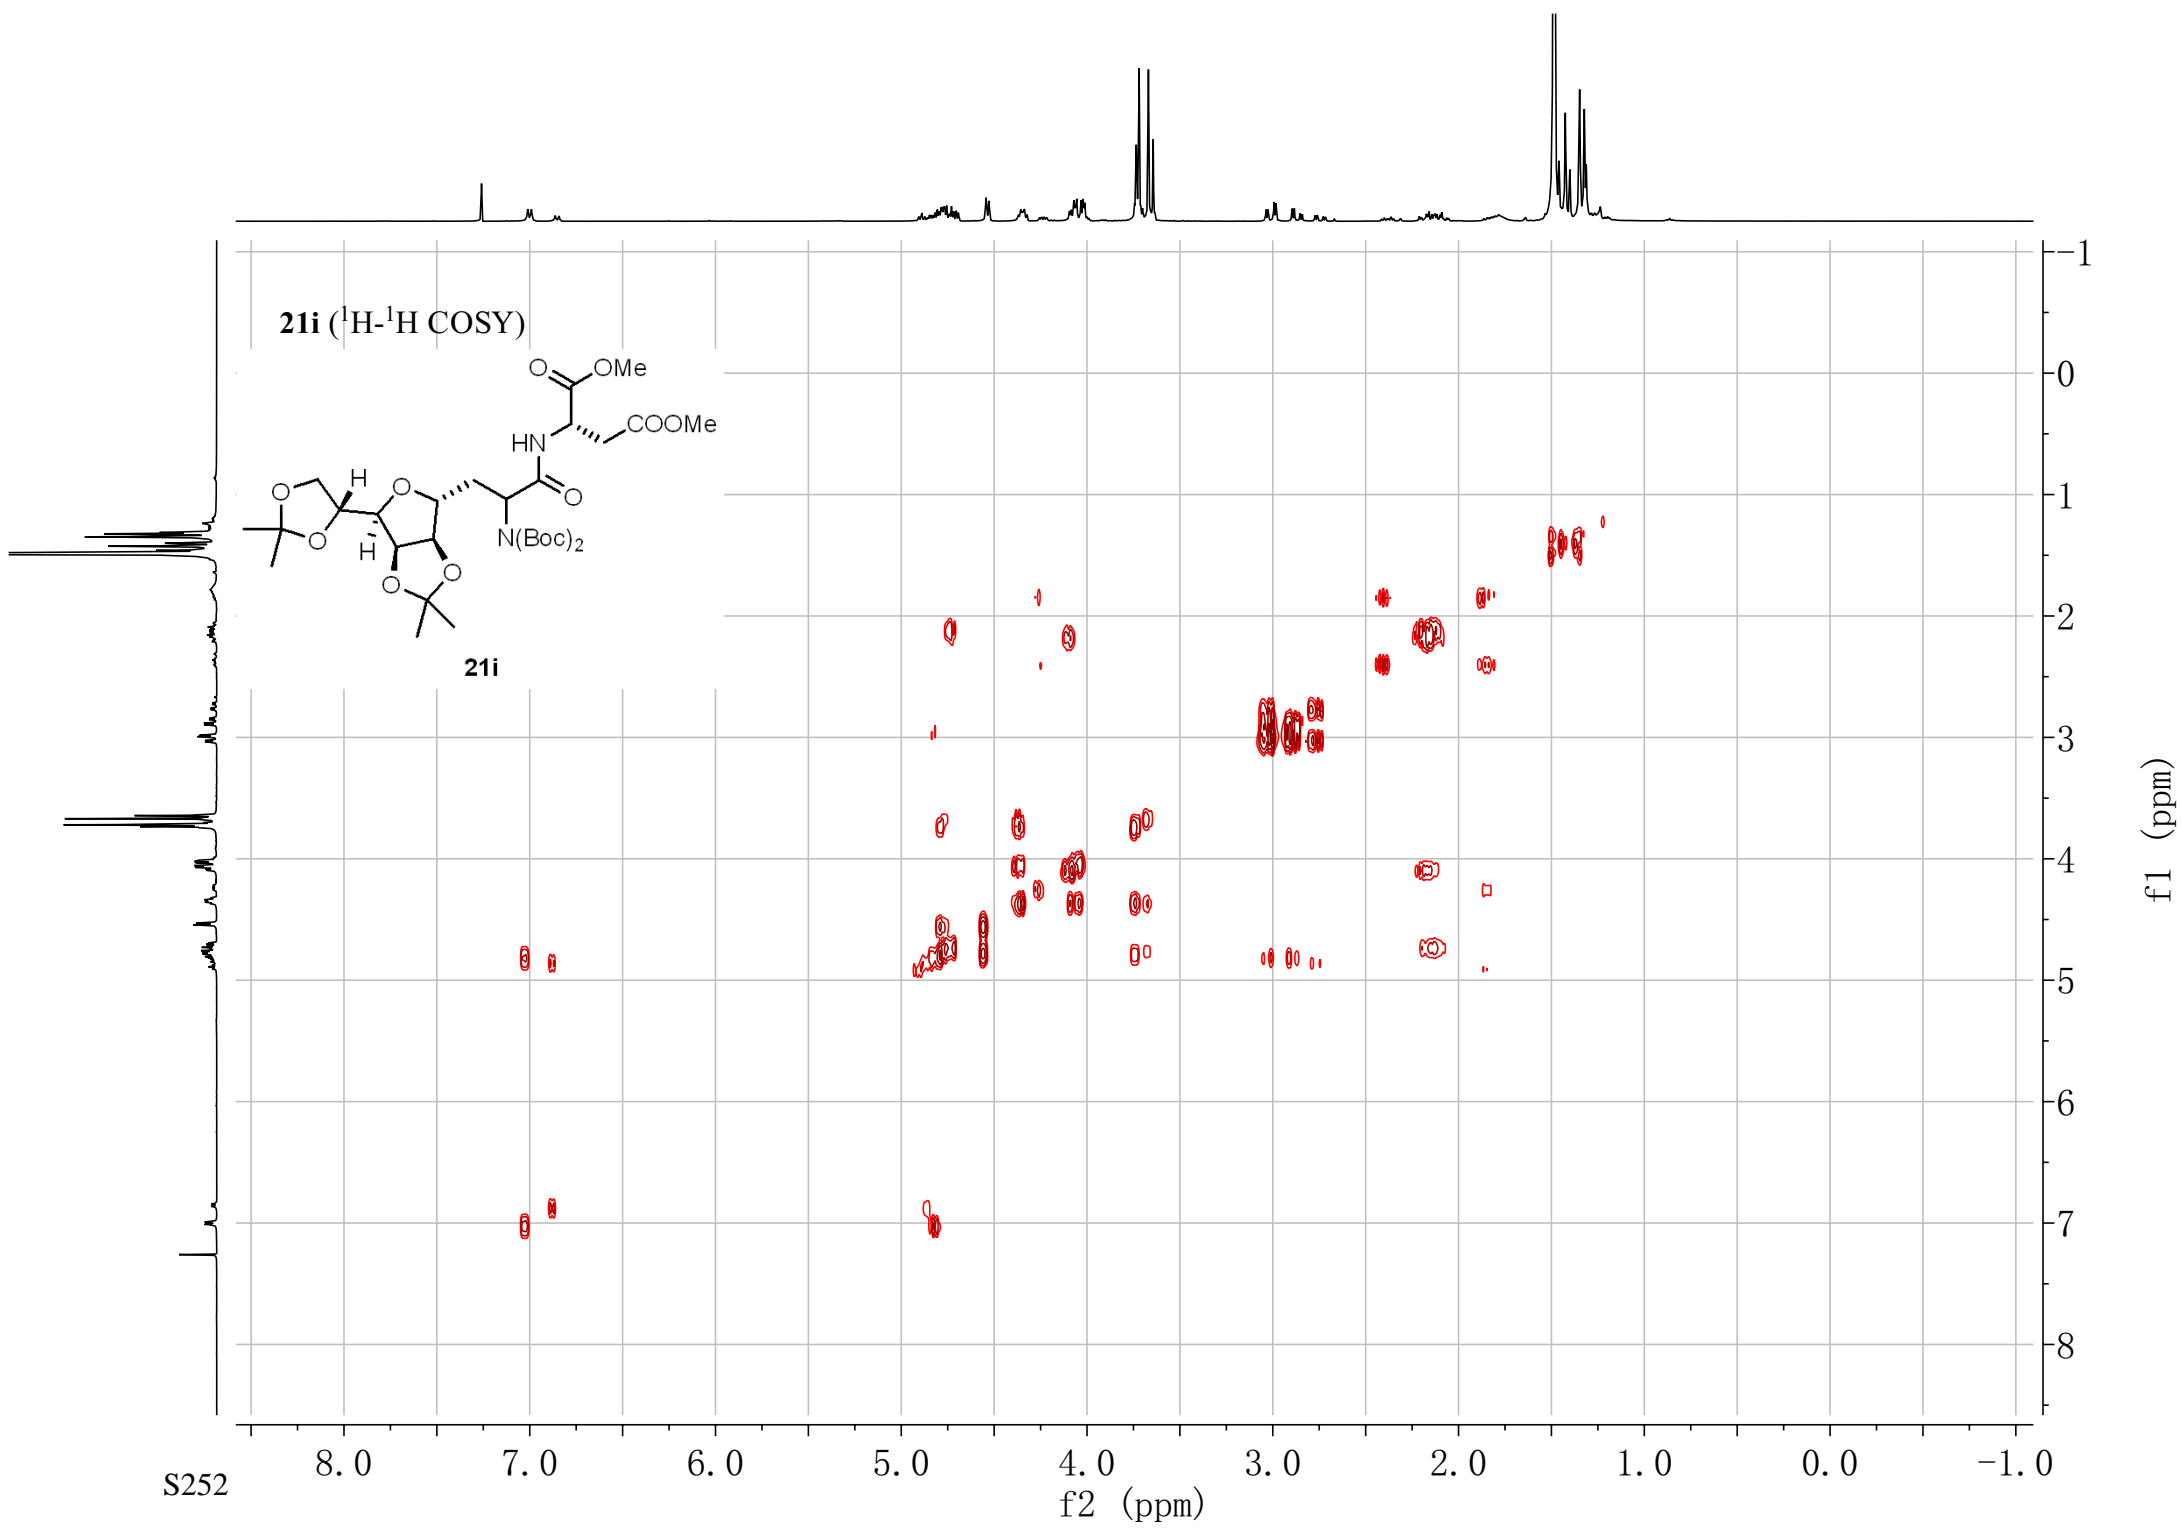

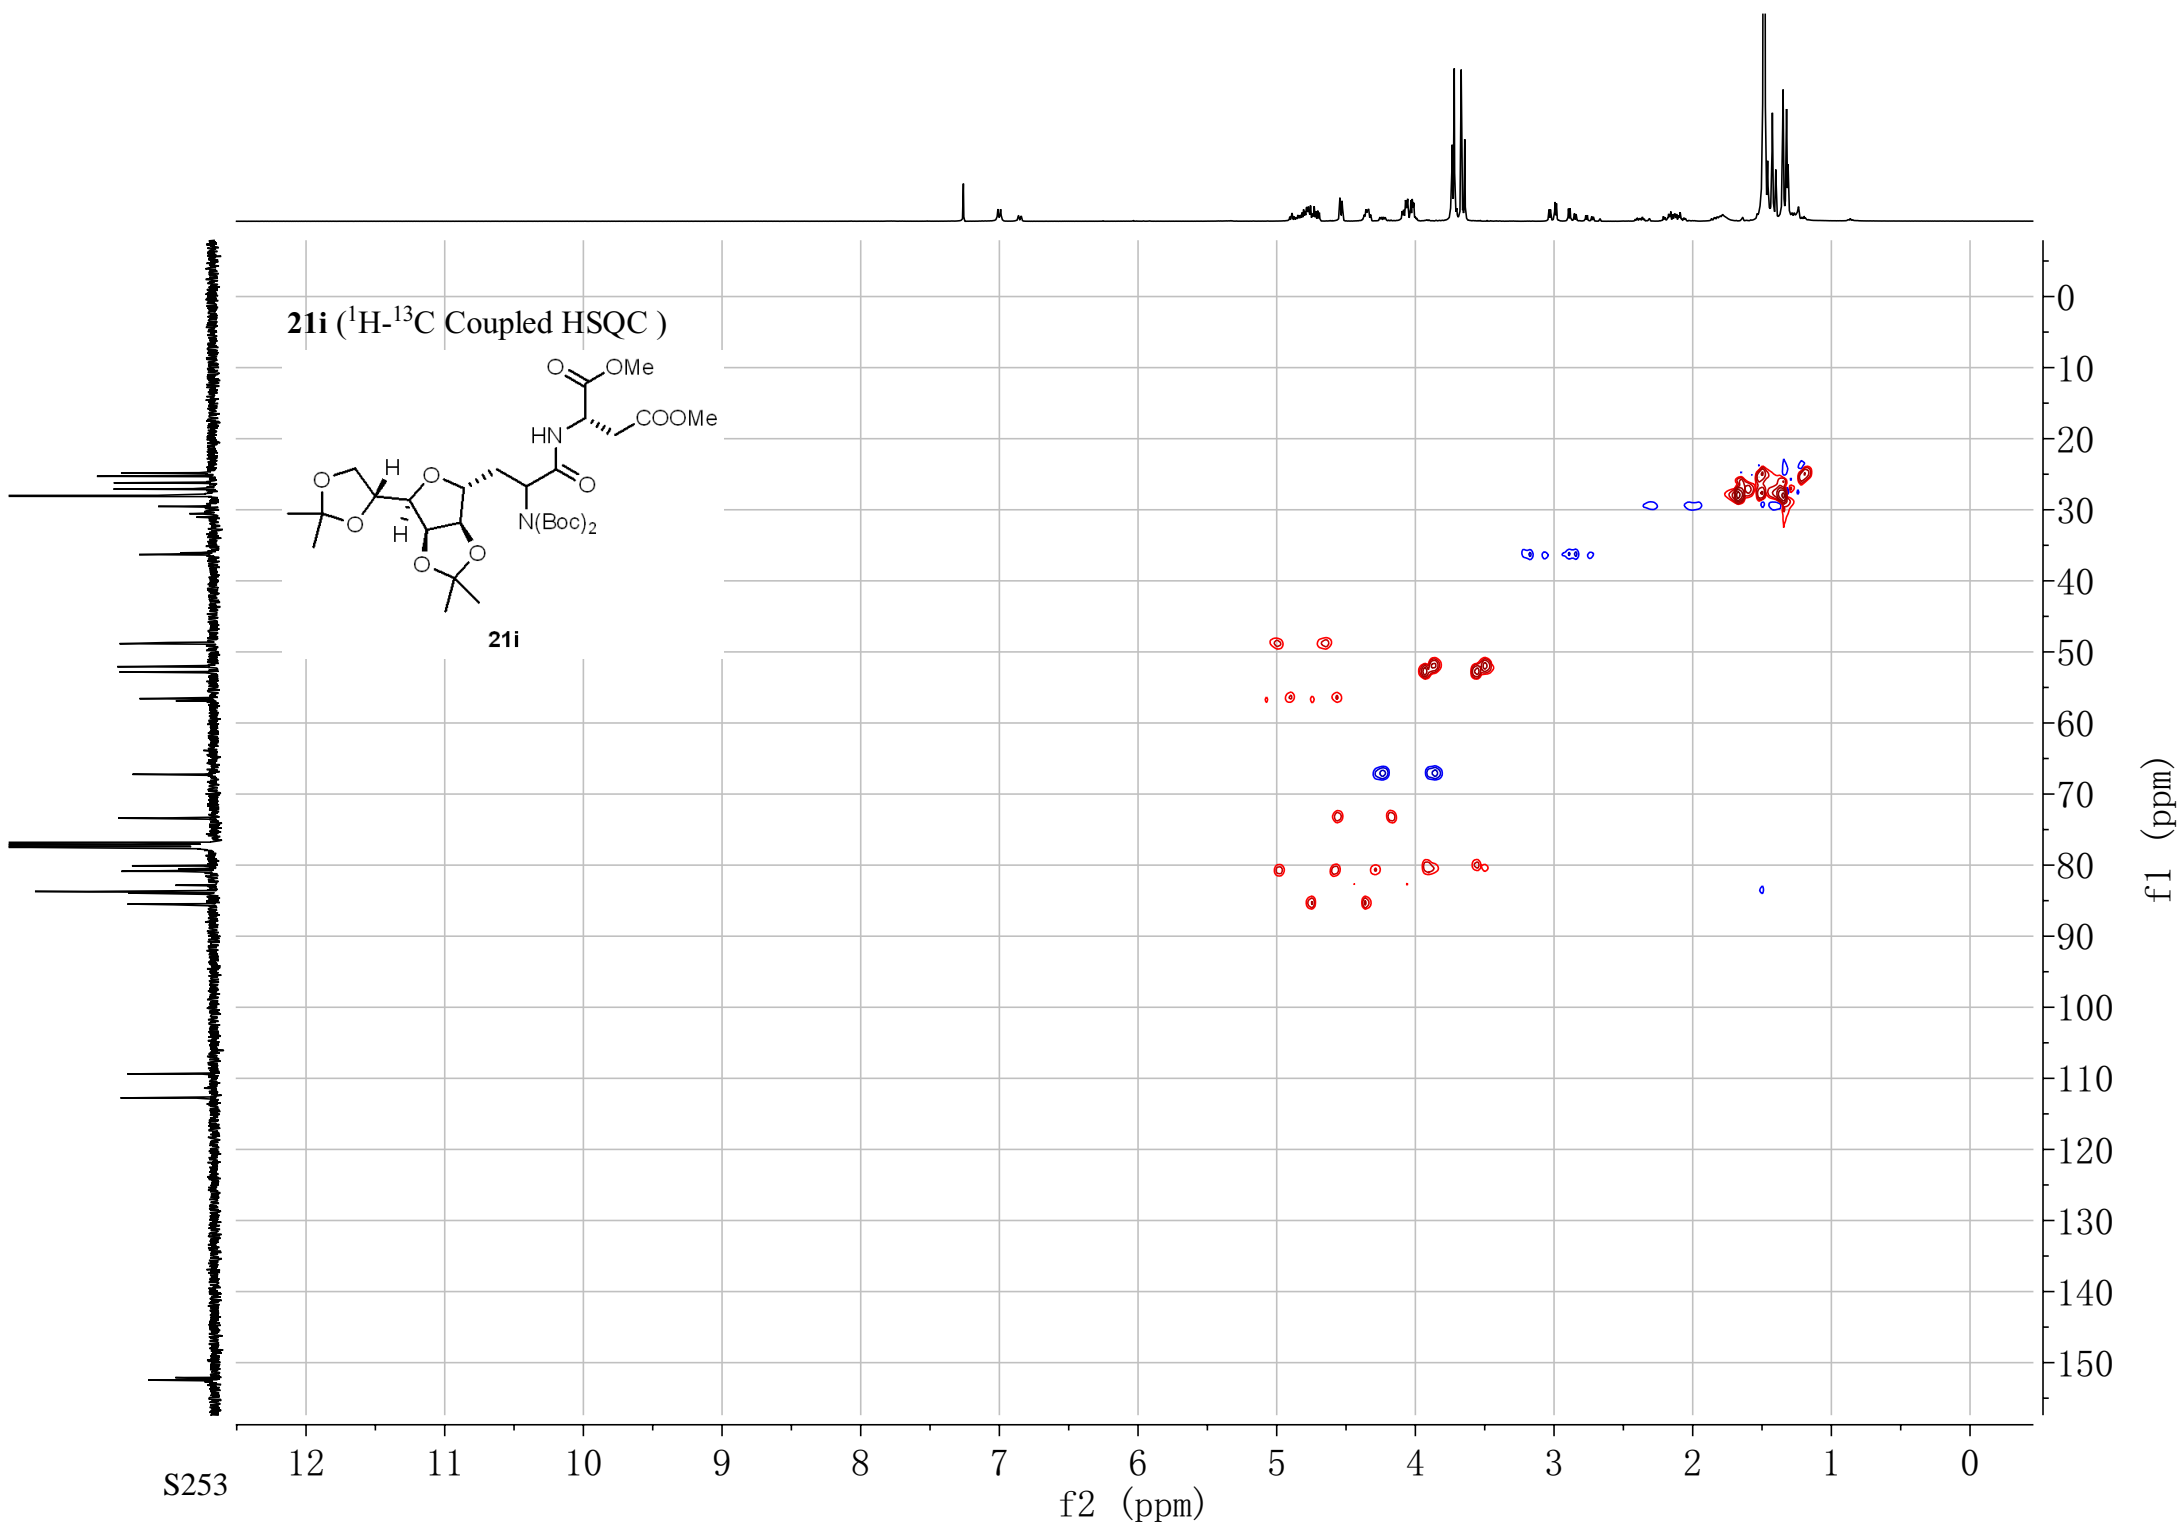



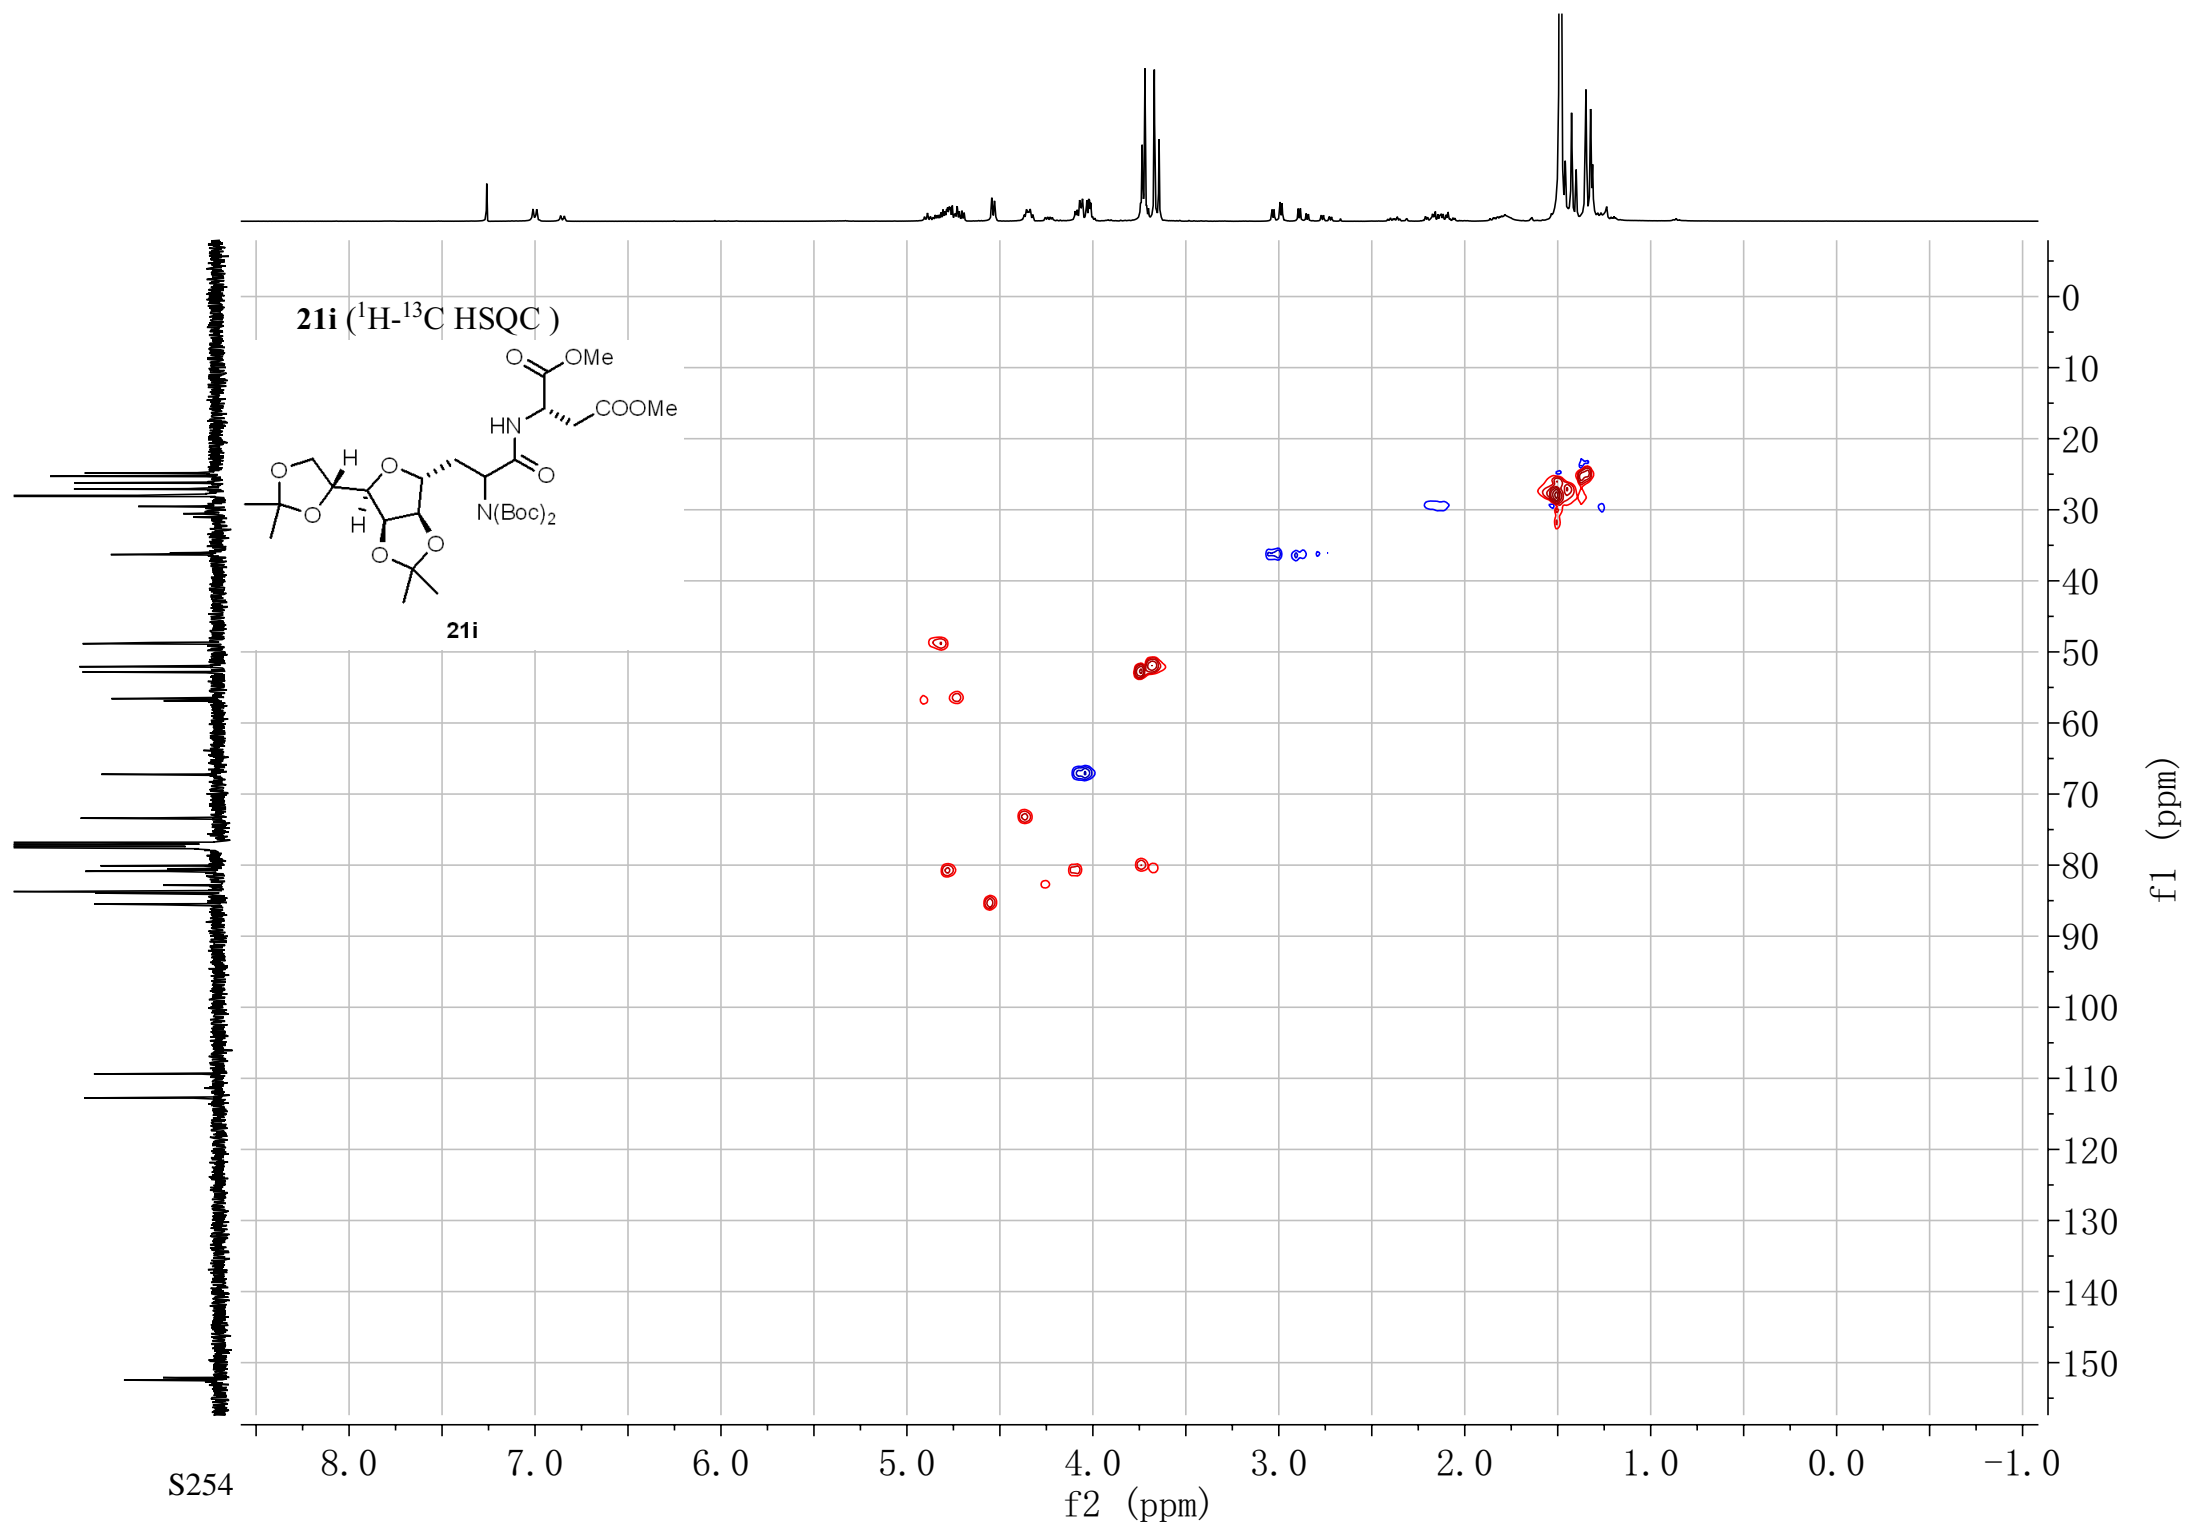

**21j** (<sup>1</sup>H NMR, 400MHz, CDCl<sub>3</sub>)

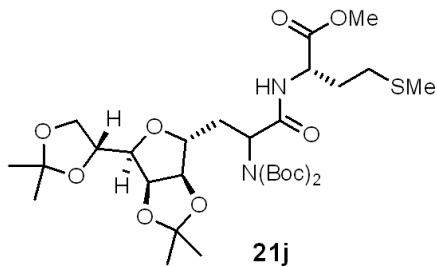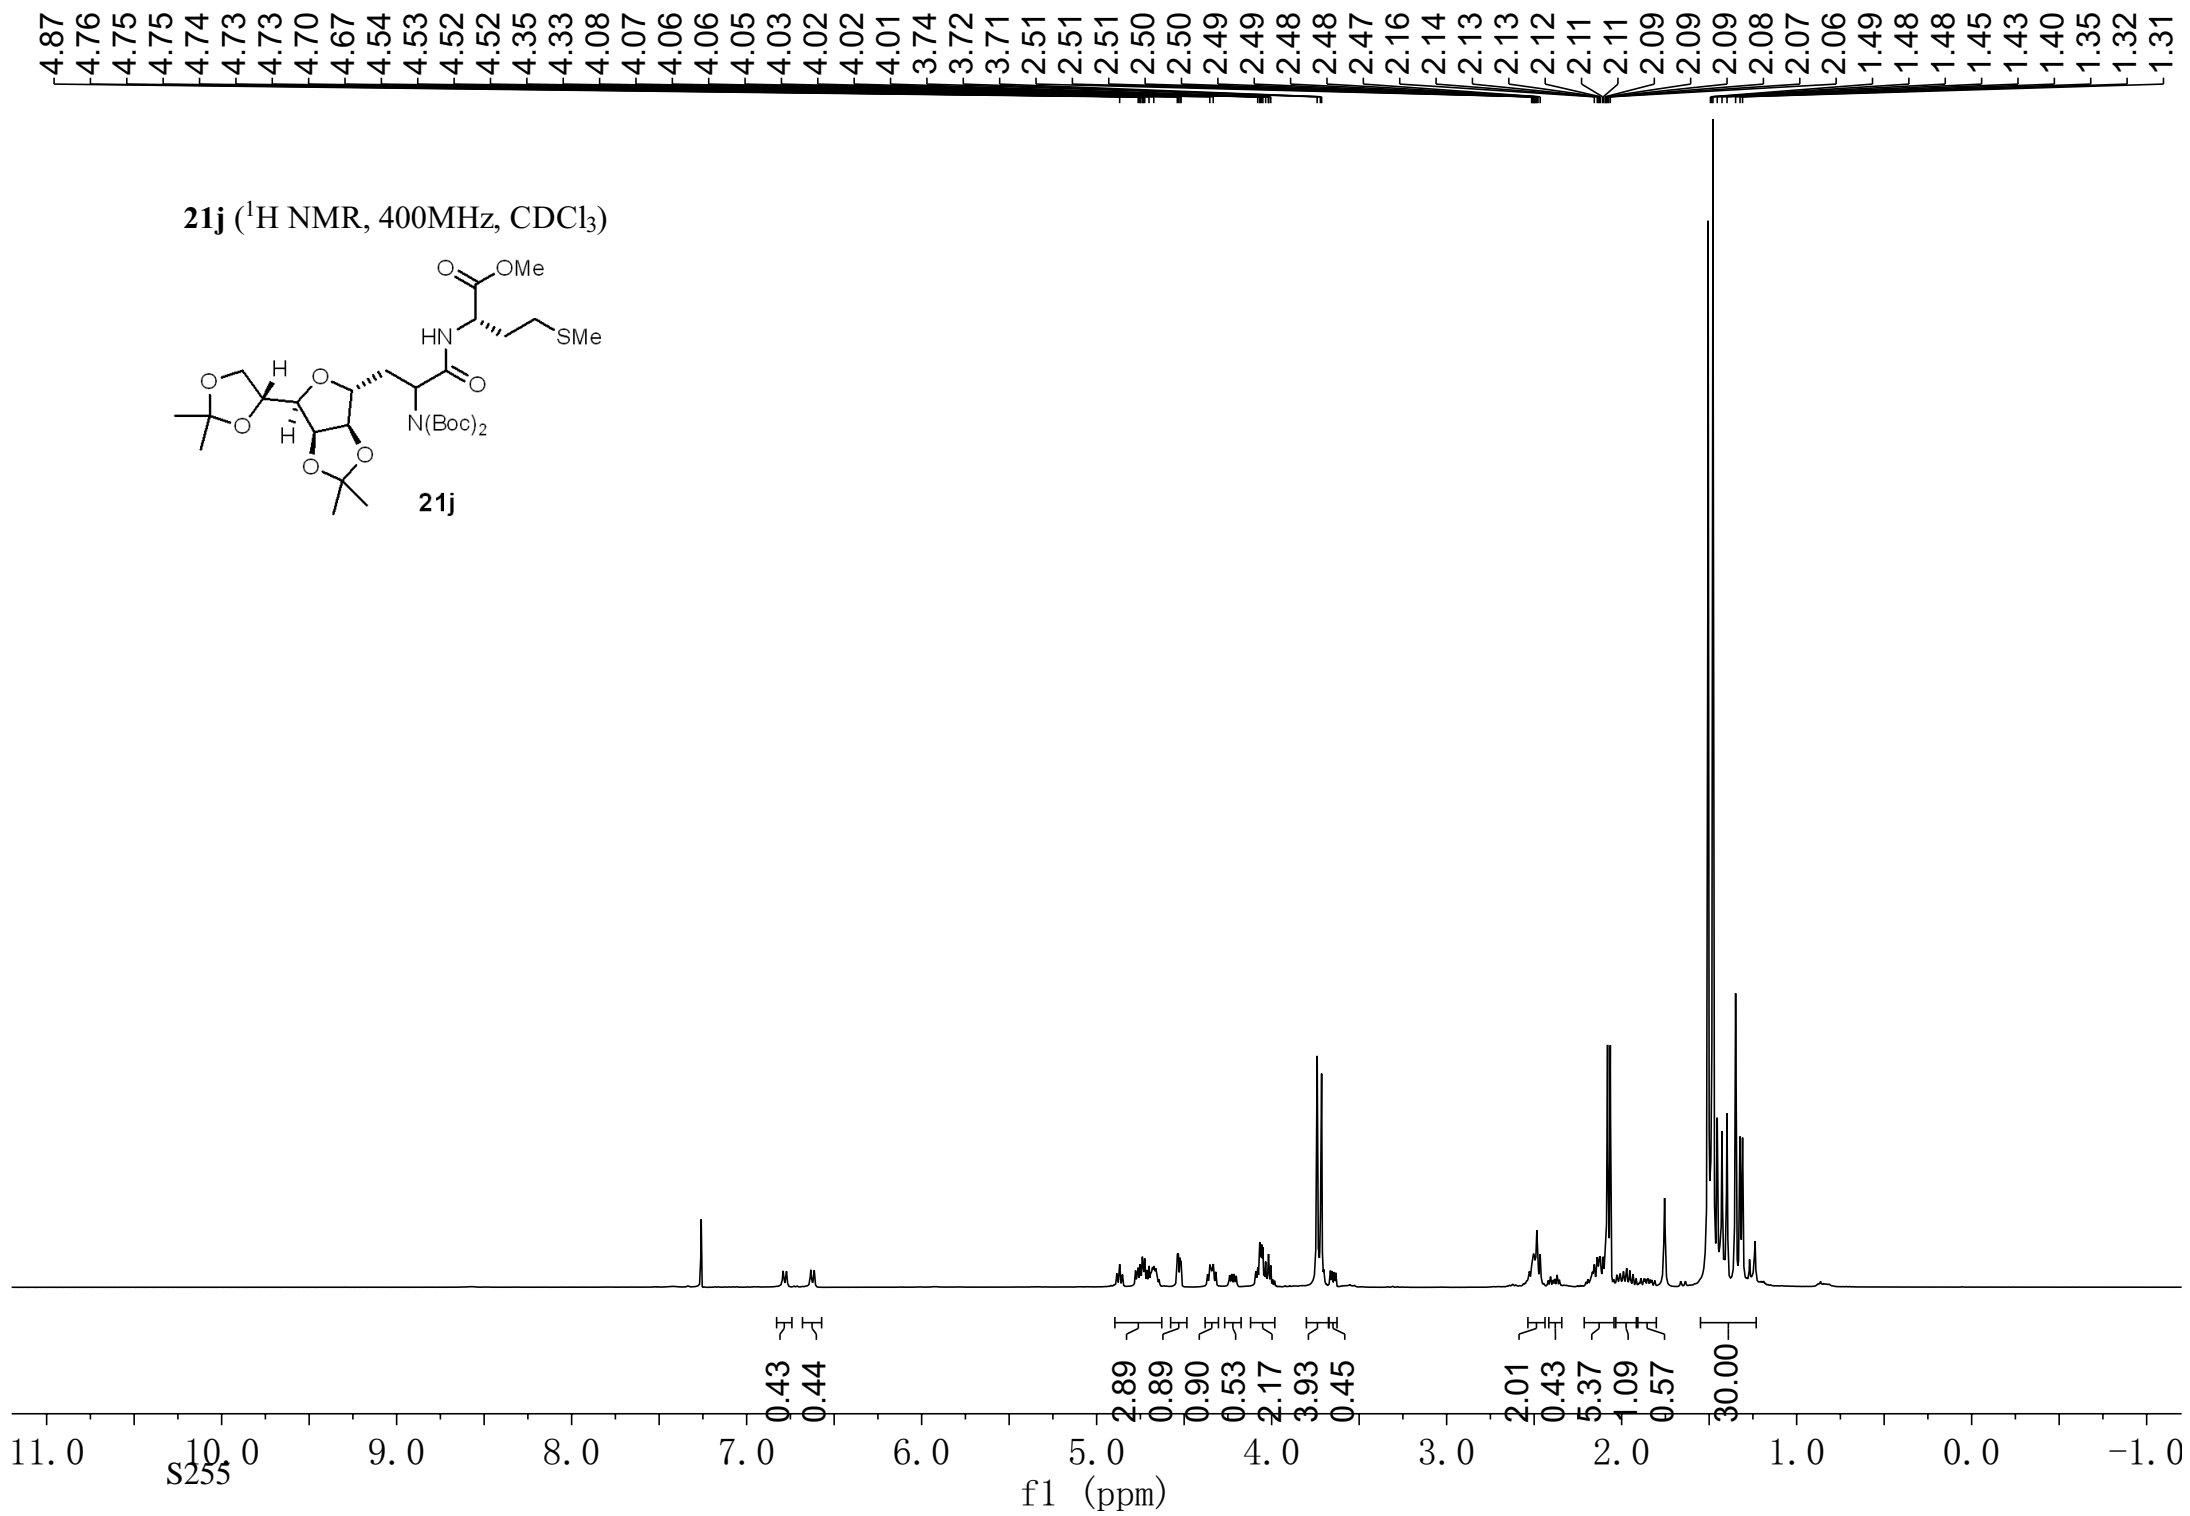

**21j** (<sup>13</sup>C NMR, 101MHz, CDCl<sub>3</sub>)

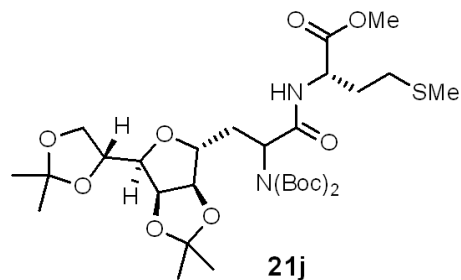

172.36  
172.18  
170.28  
169.83  
  
152.63  
152.20

112.76  
112.70  
109.39  
109.29  
85.59  
85.47  
84.08  
83.76  
82.91  
80.89  
80.79  
80.75  
80.53  
80.15  
77.16  
73.39  
67.25  
67.22

57.10  
52.67  
52.55  
51.93  
51.76  
31.75  
29.98  
29.94  
28.10  
28.02  
27.08  
27.06  
26.27  
26.23  
25.32  
25.29  
24.95  
24.87  
15.55  
15.11

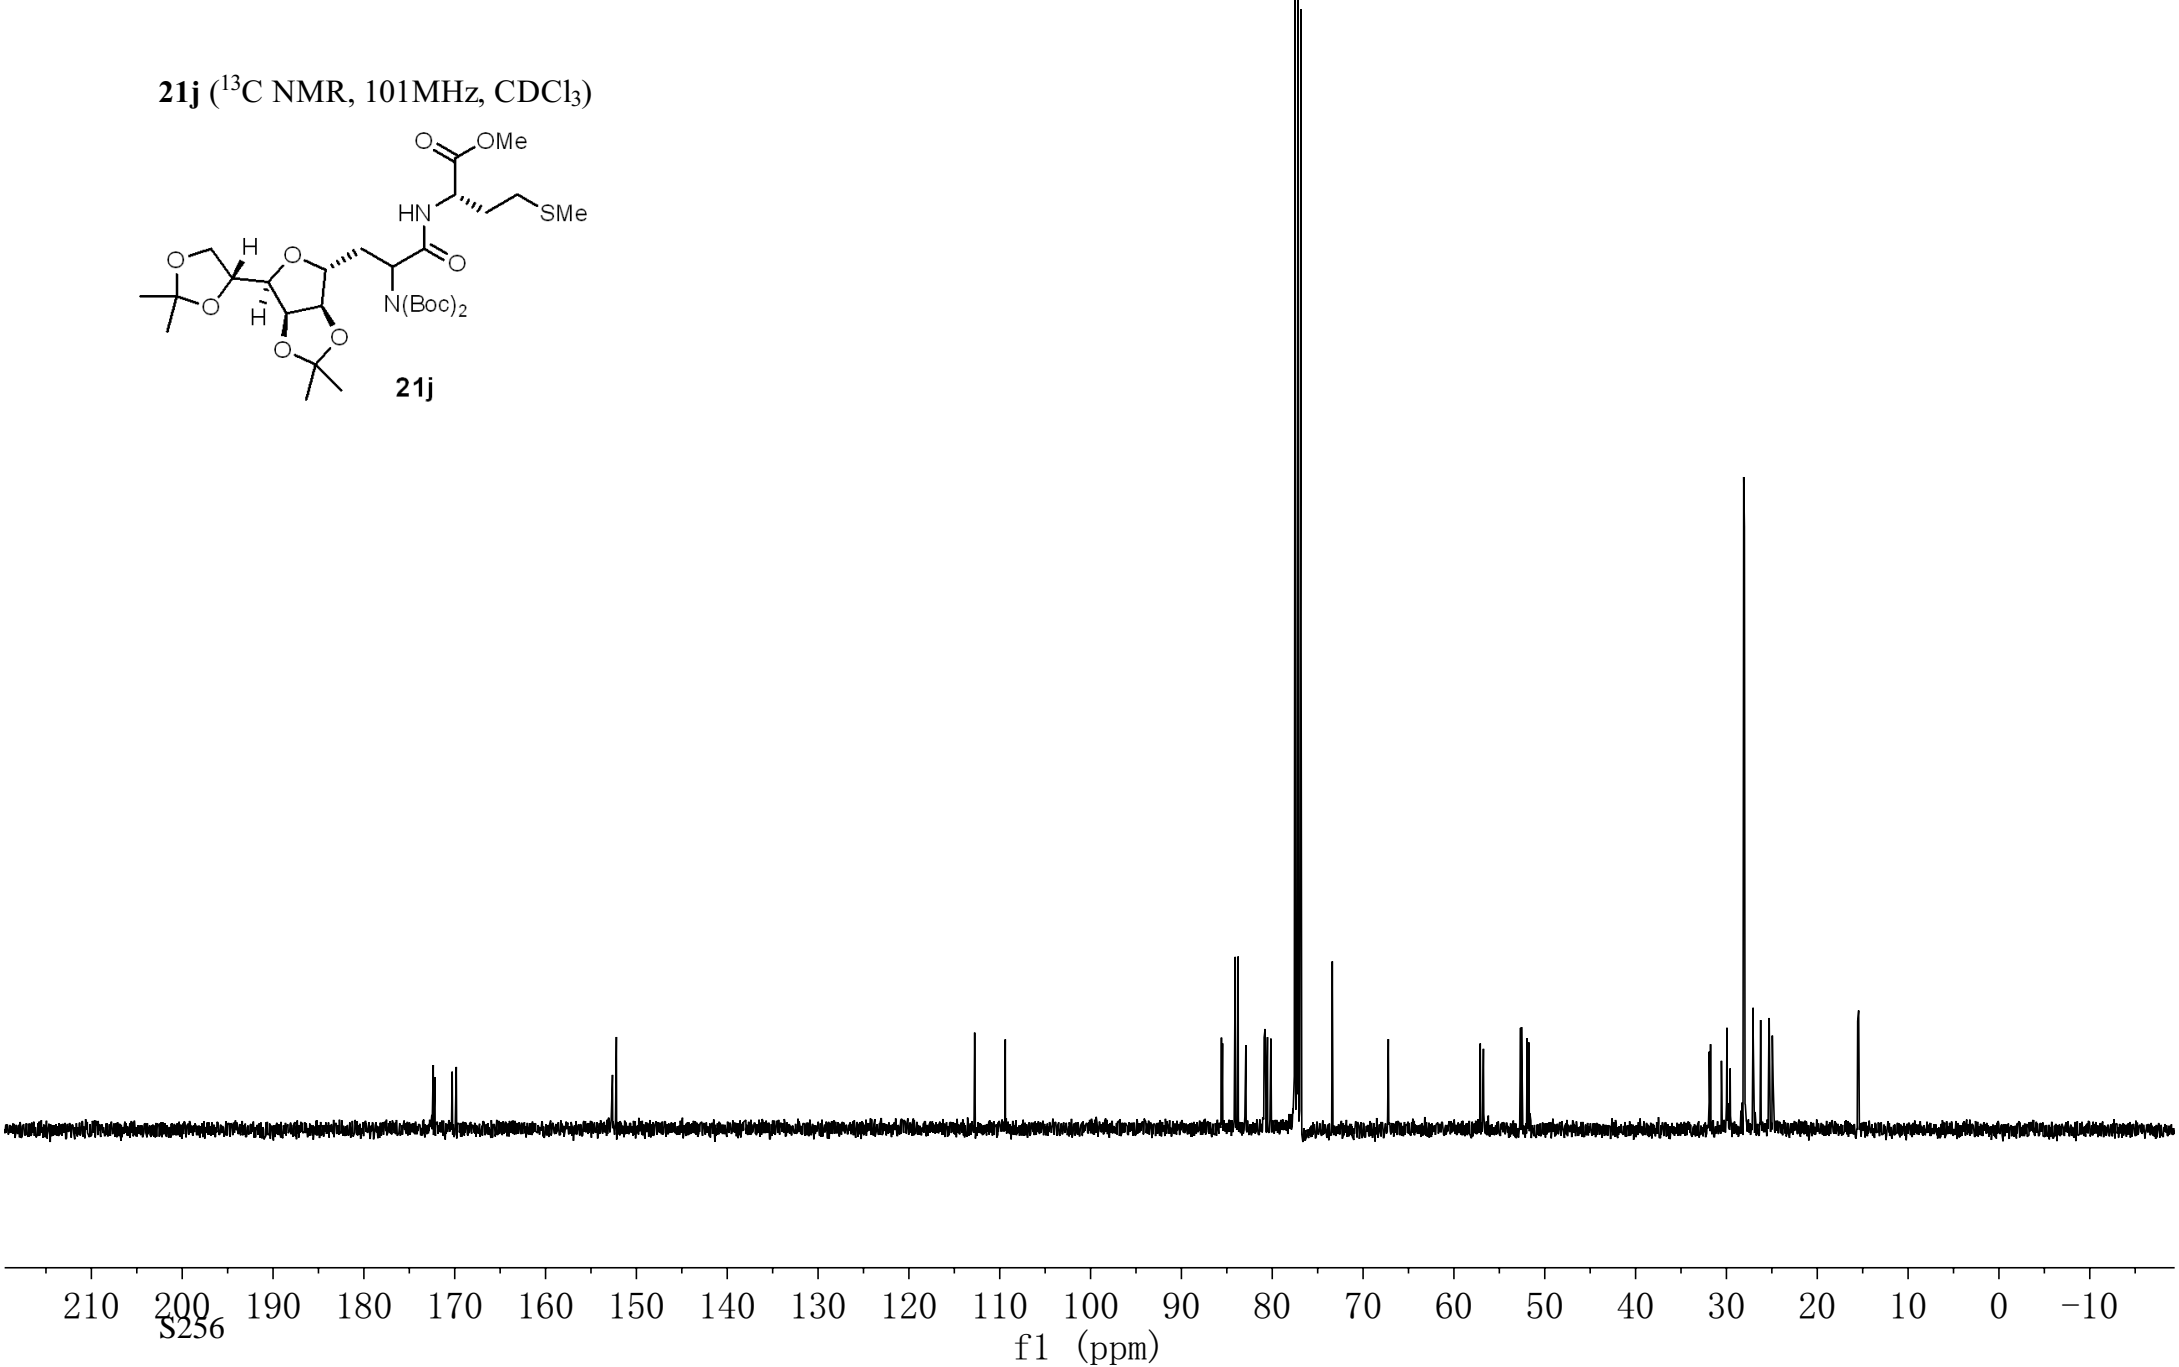

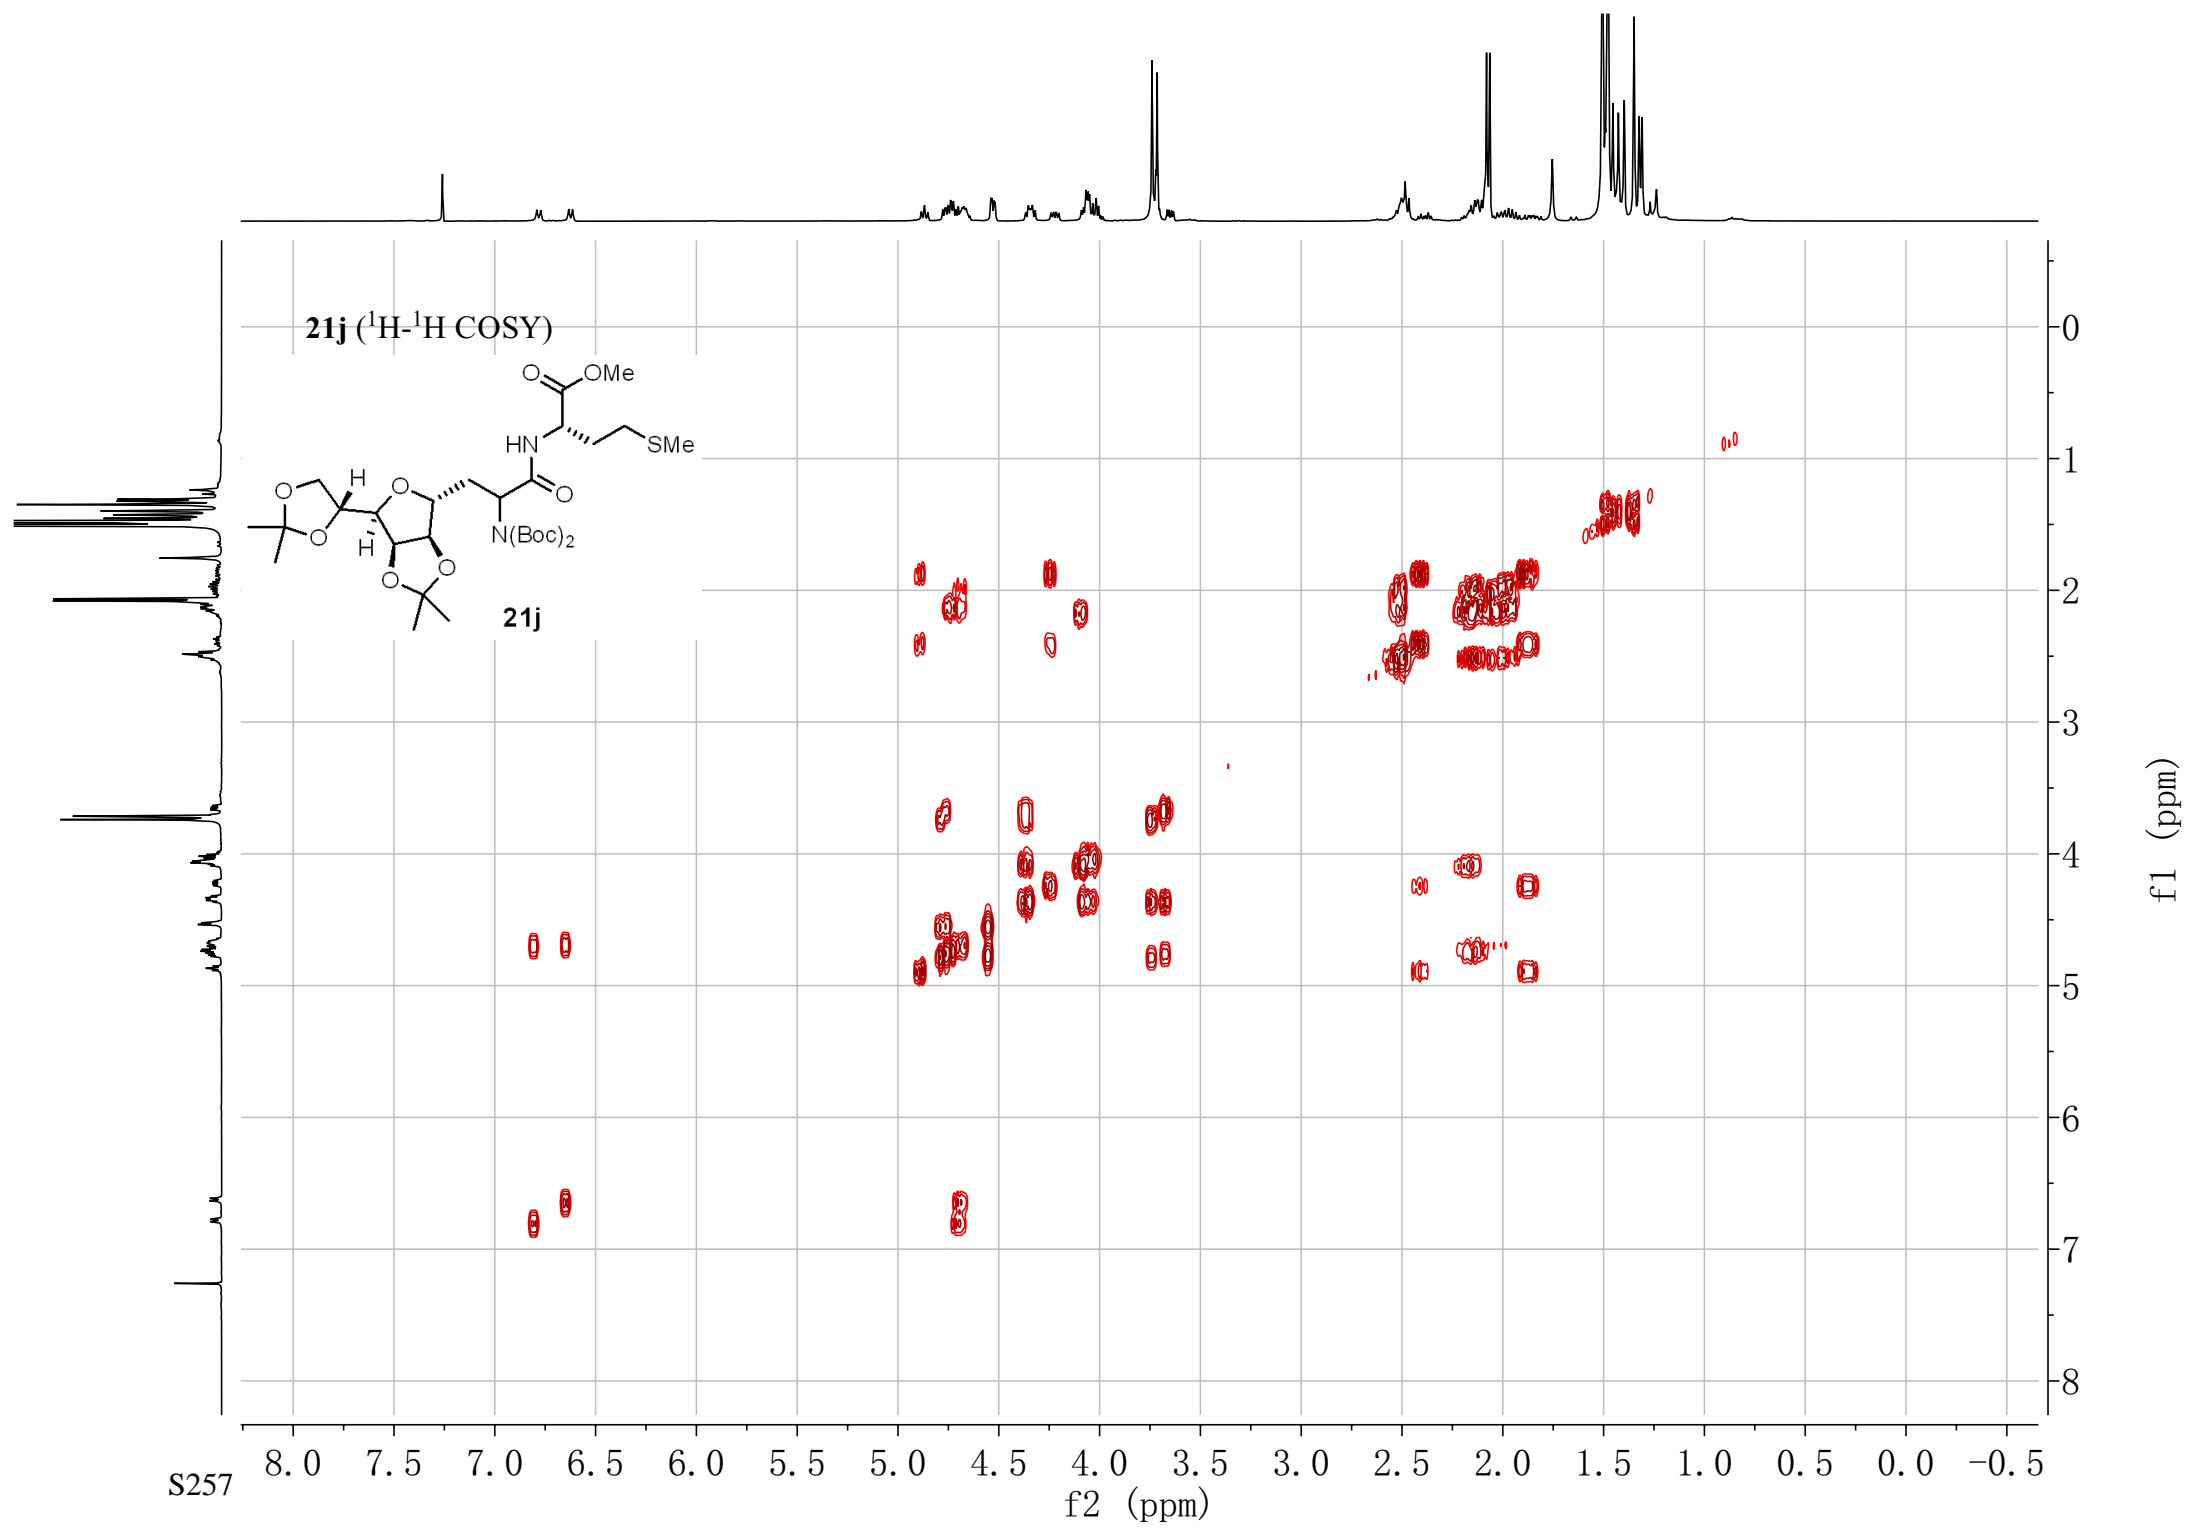

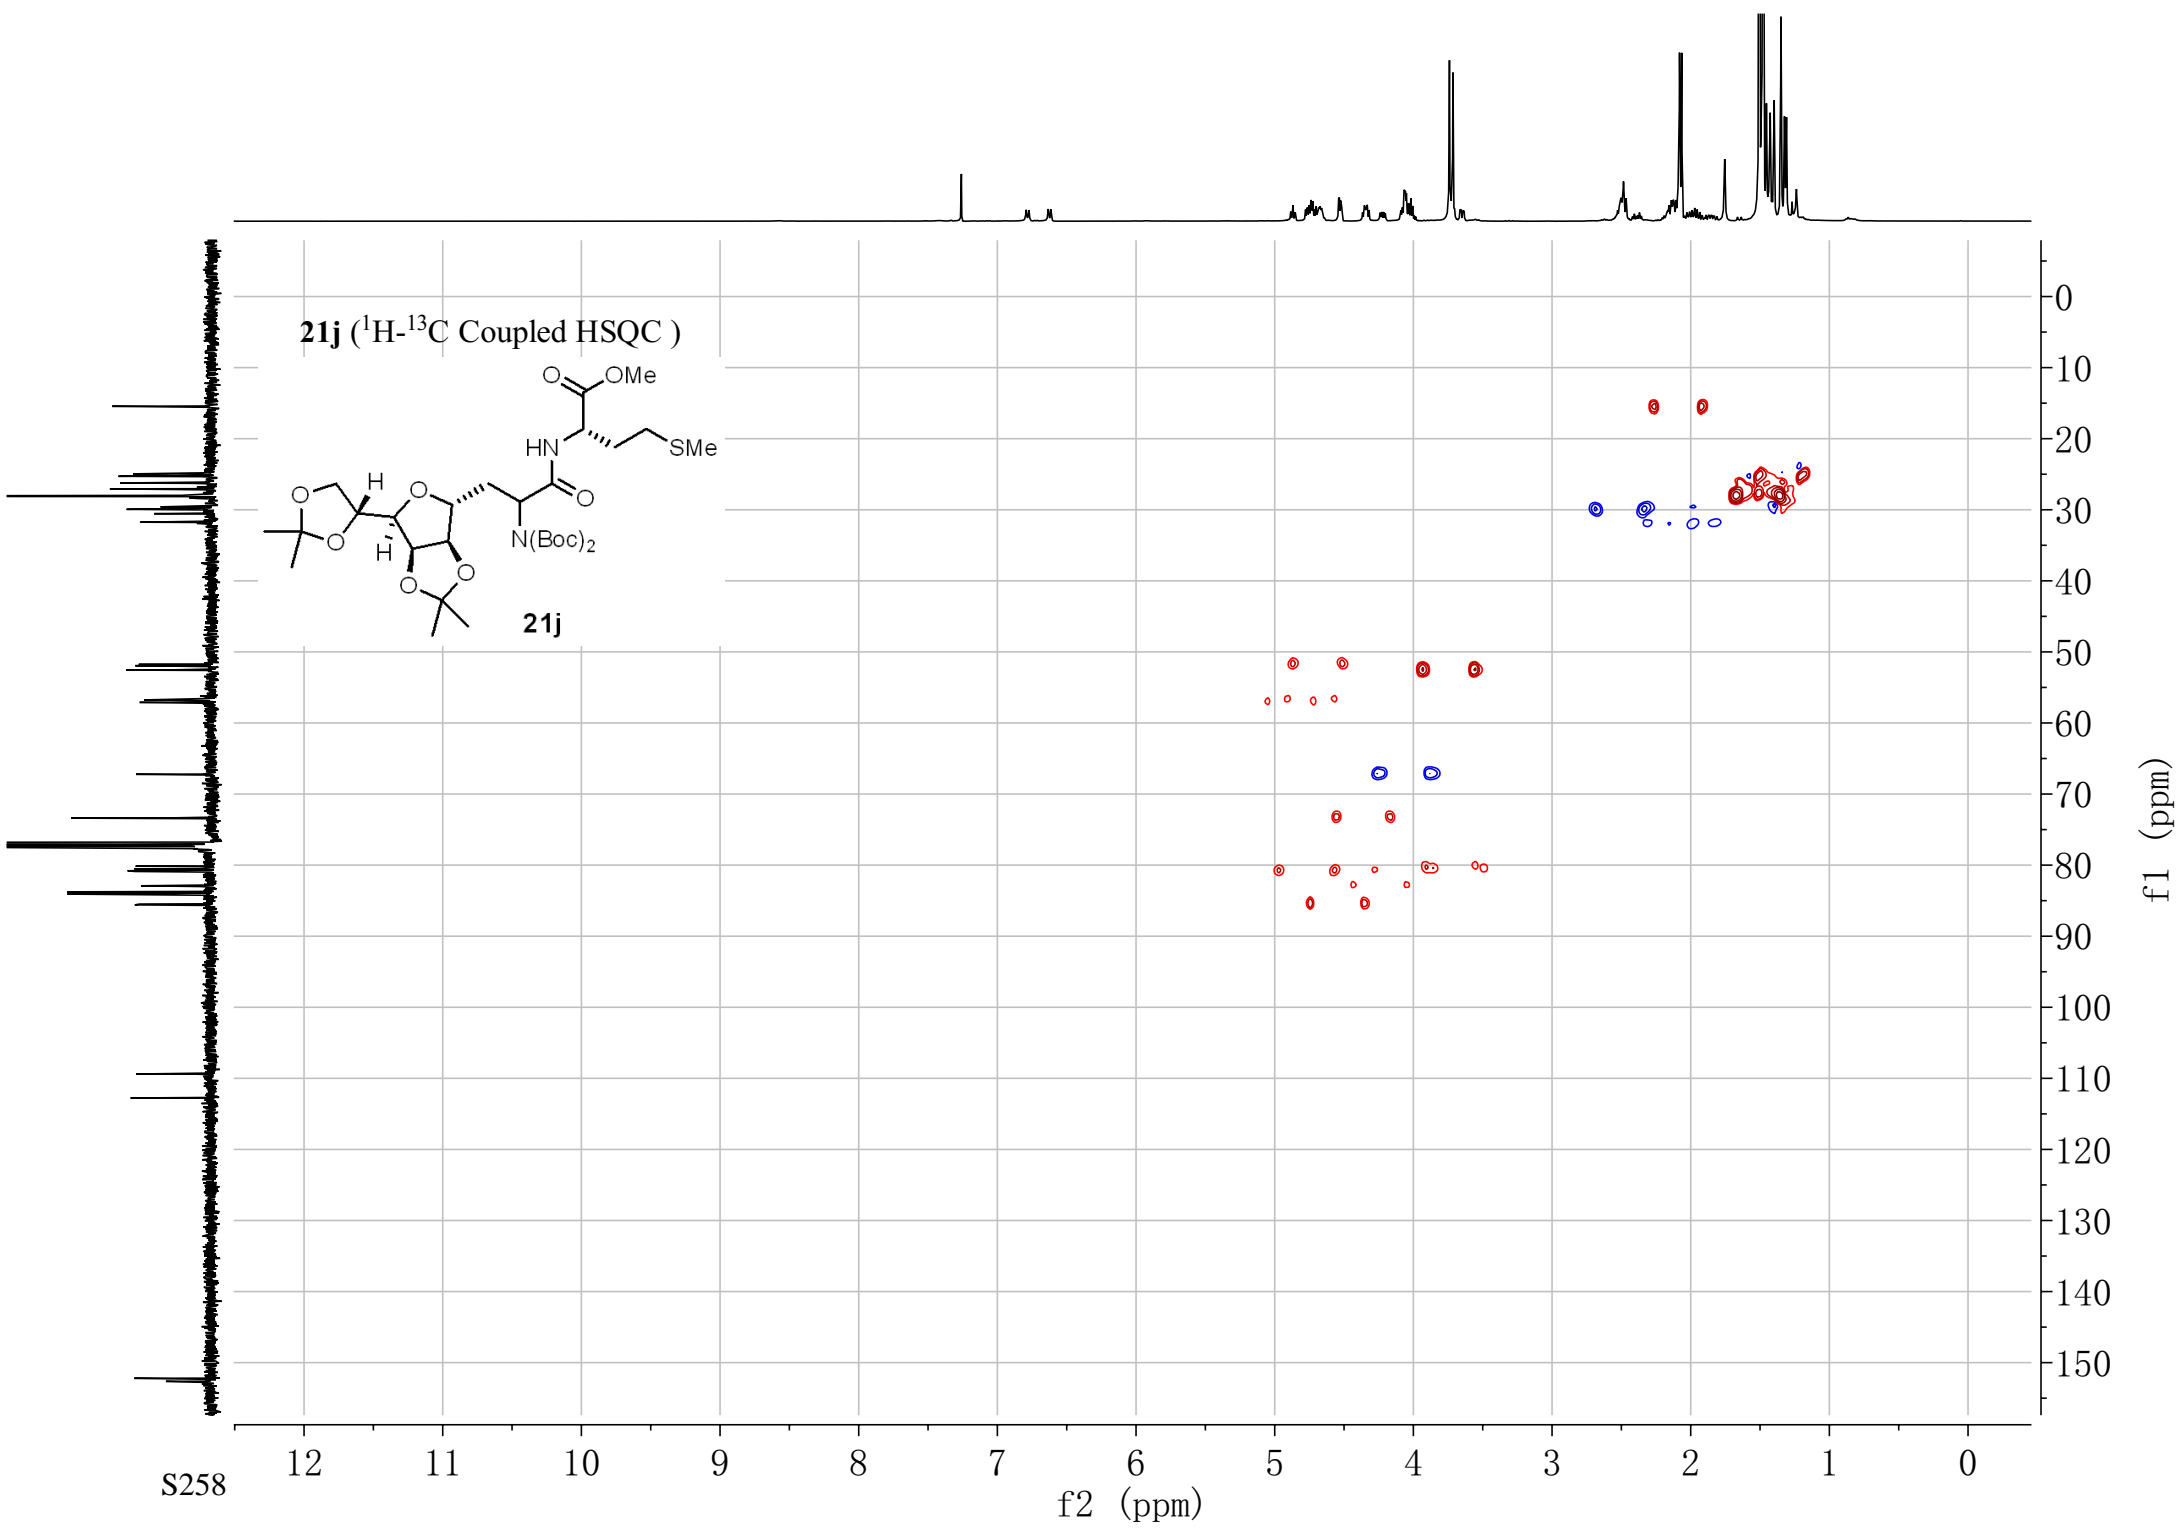

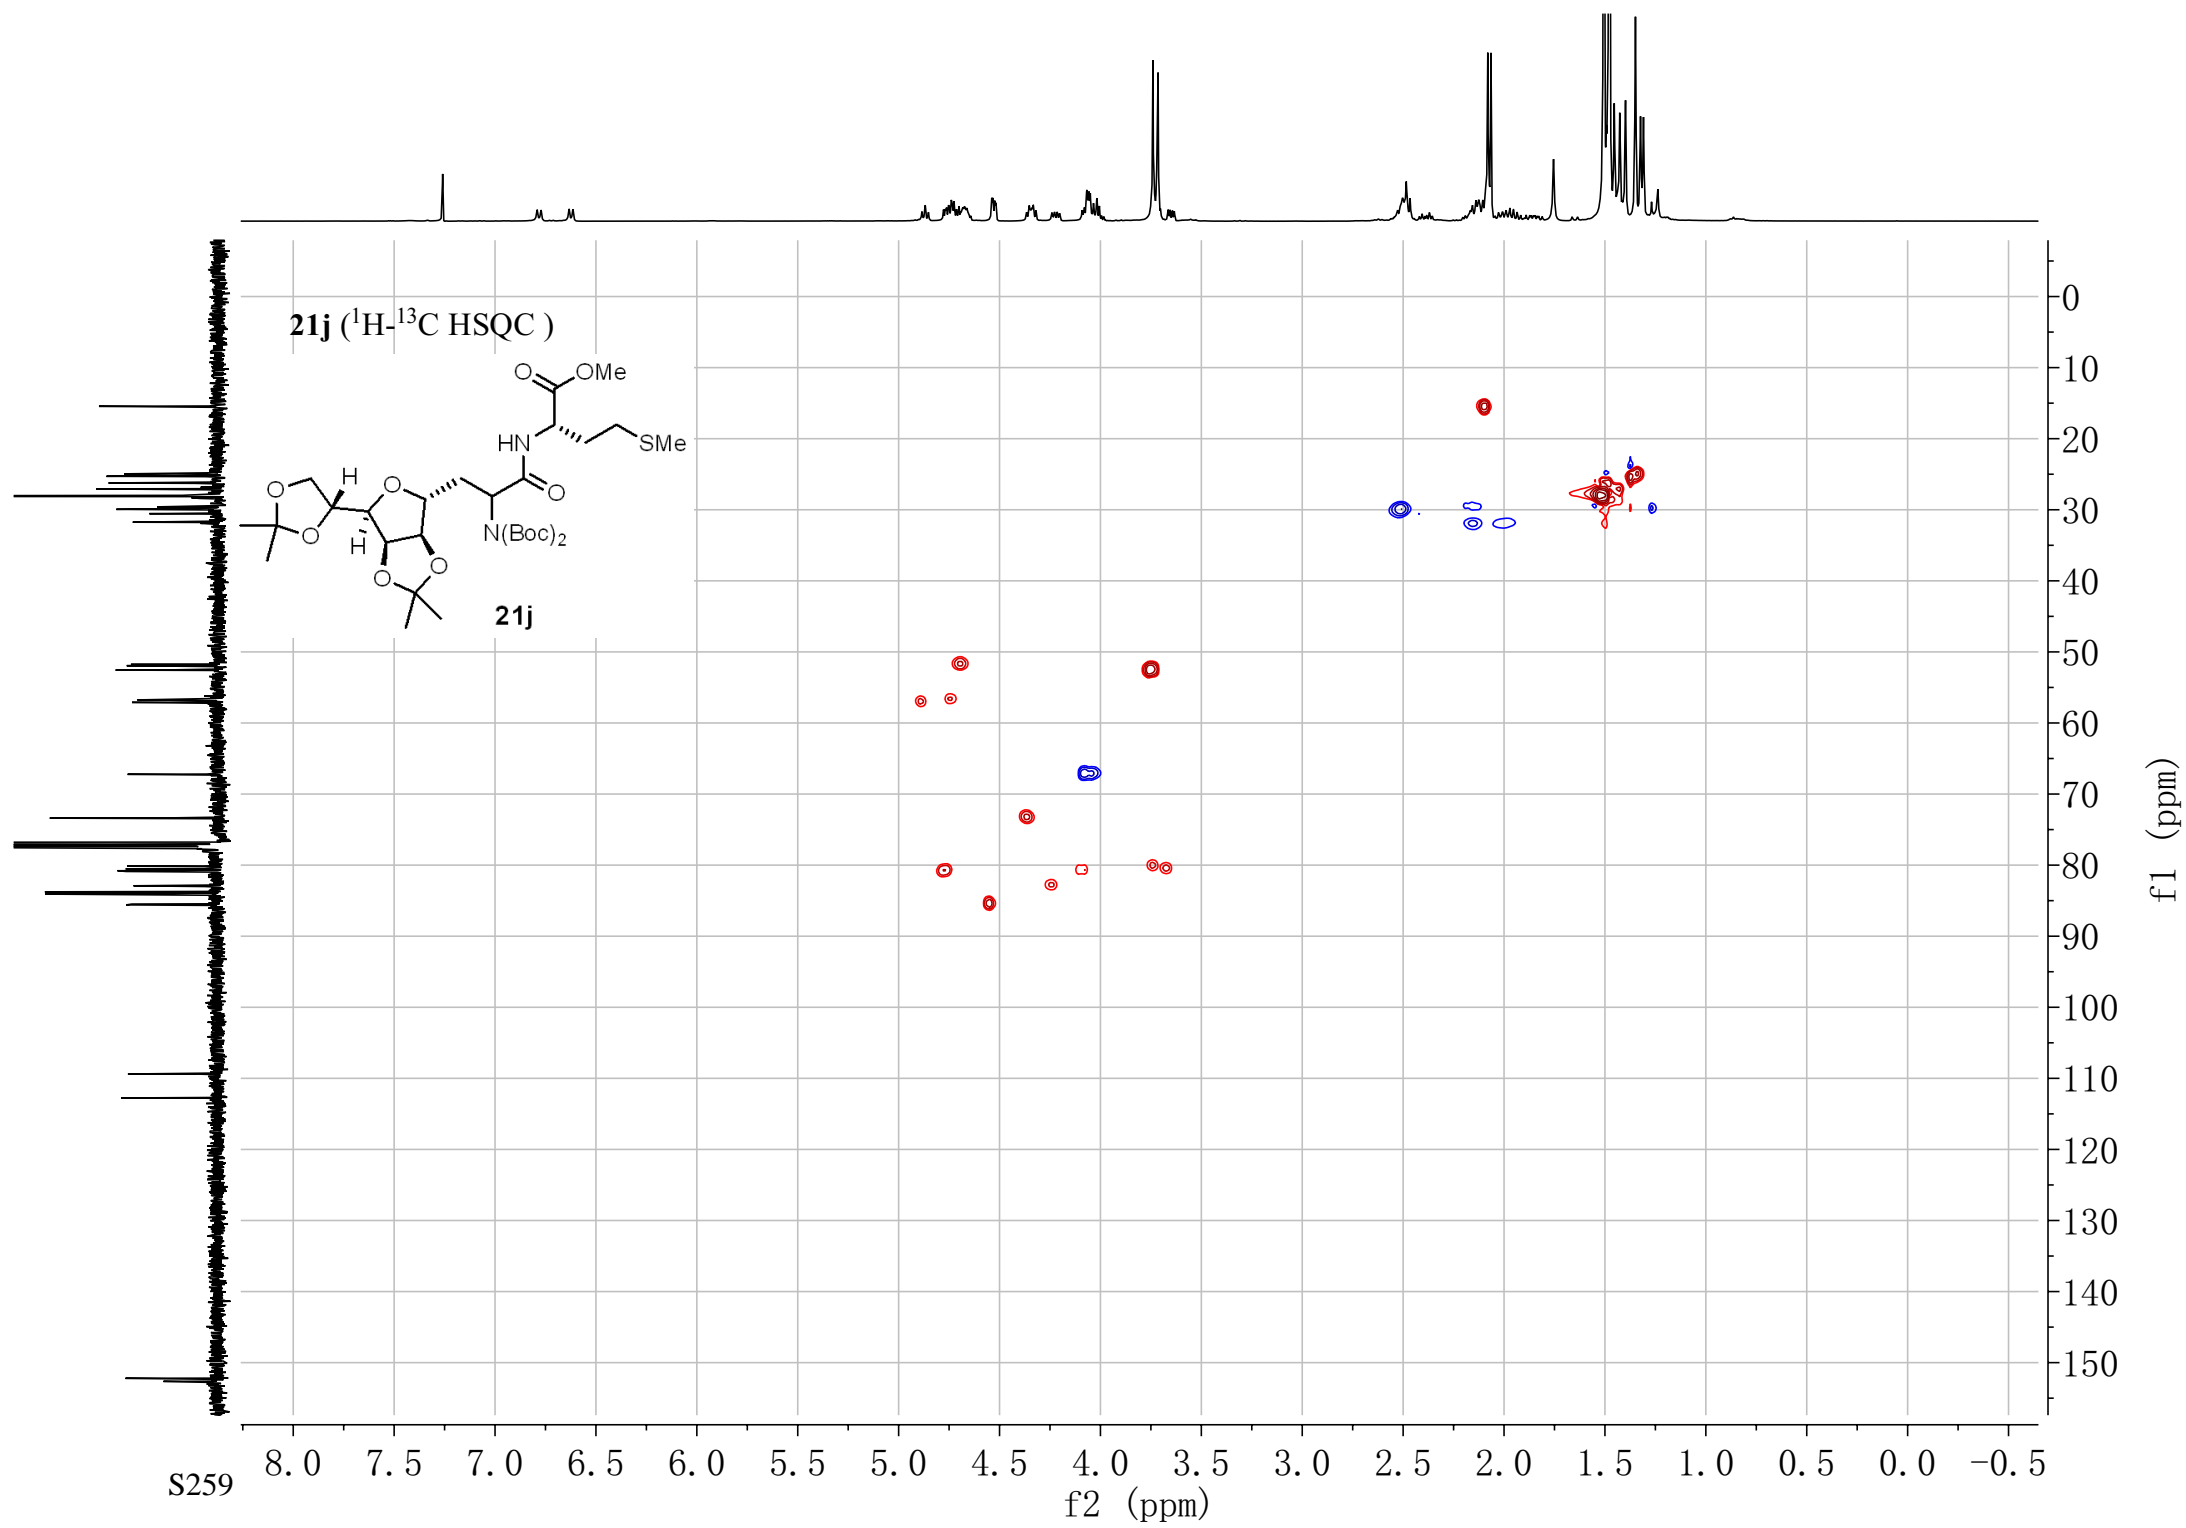

21k (<sup>1</sup>H NMR, 400MHz, CDCl<sub>3</sub>)

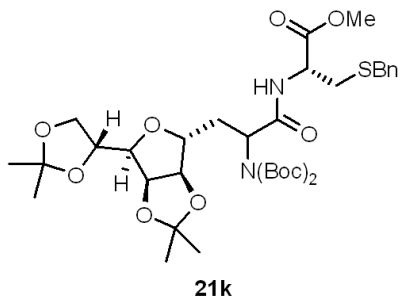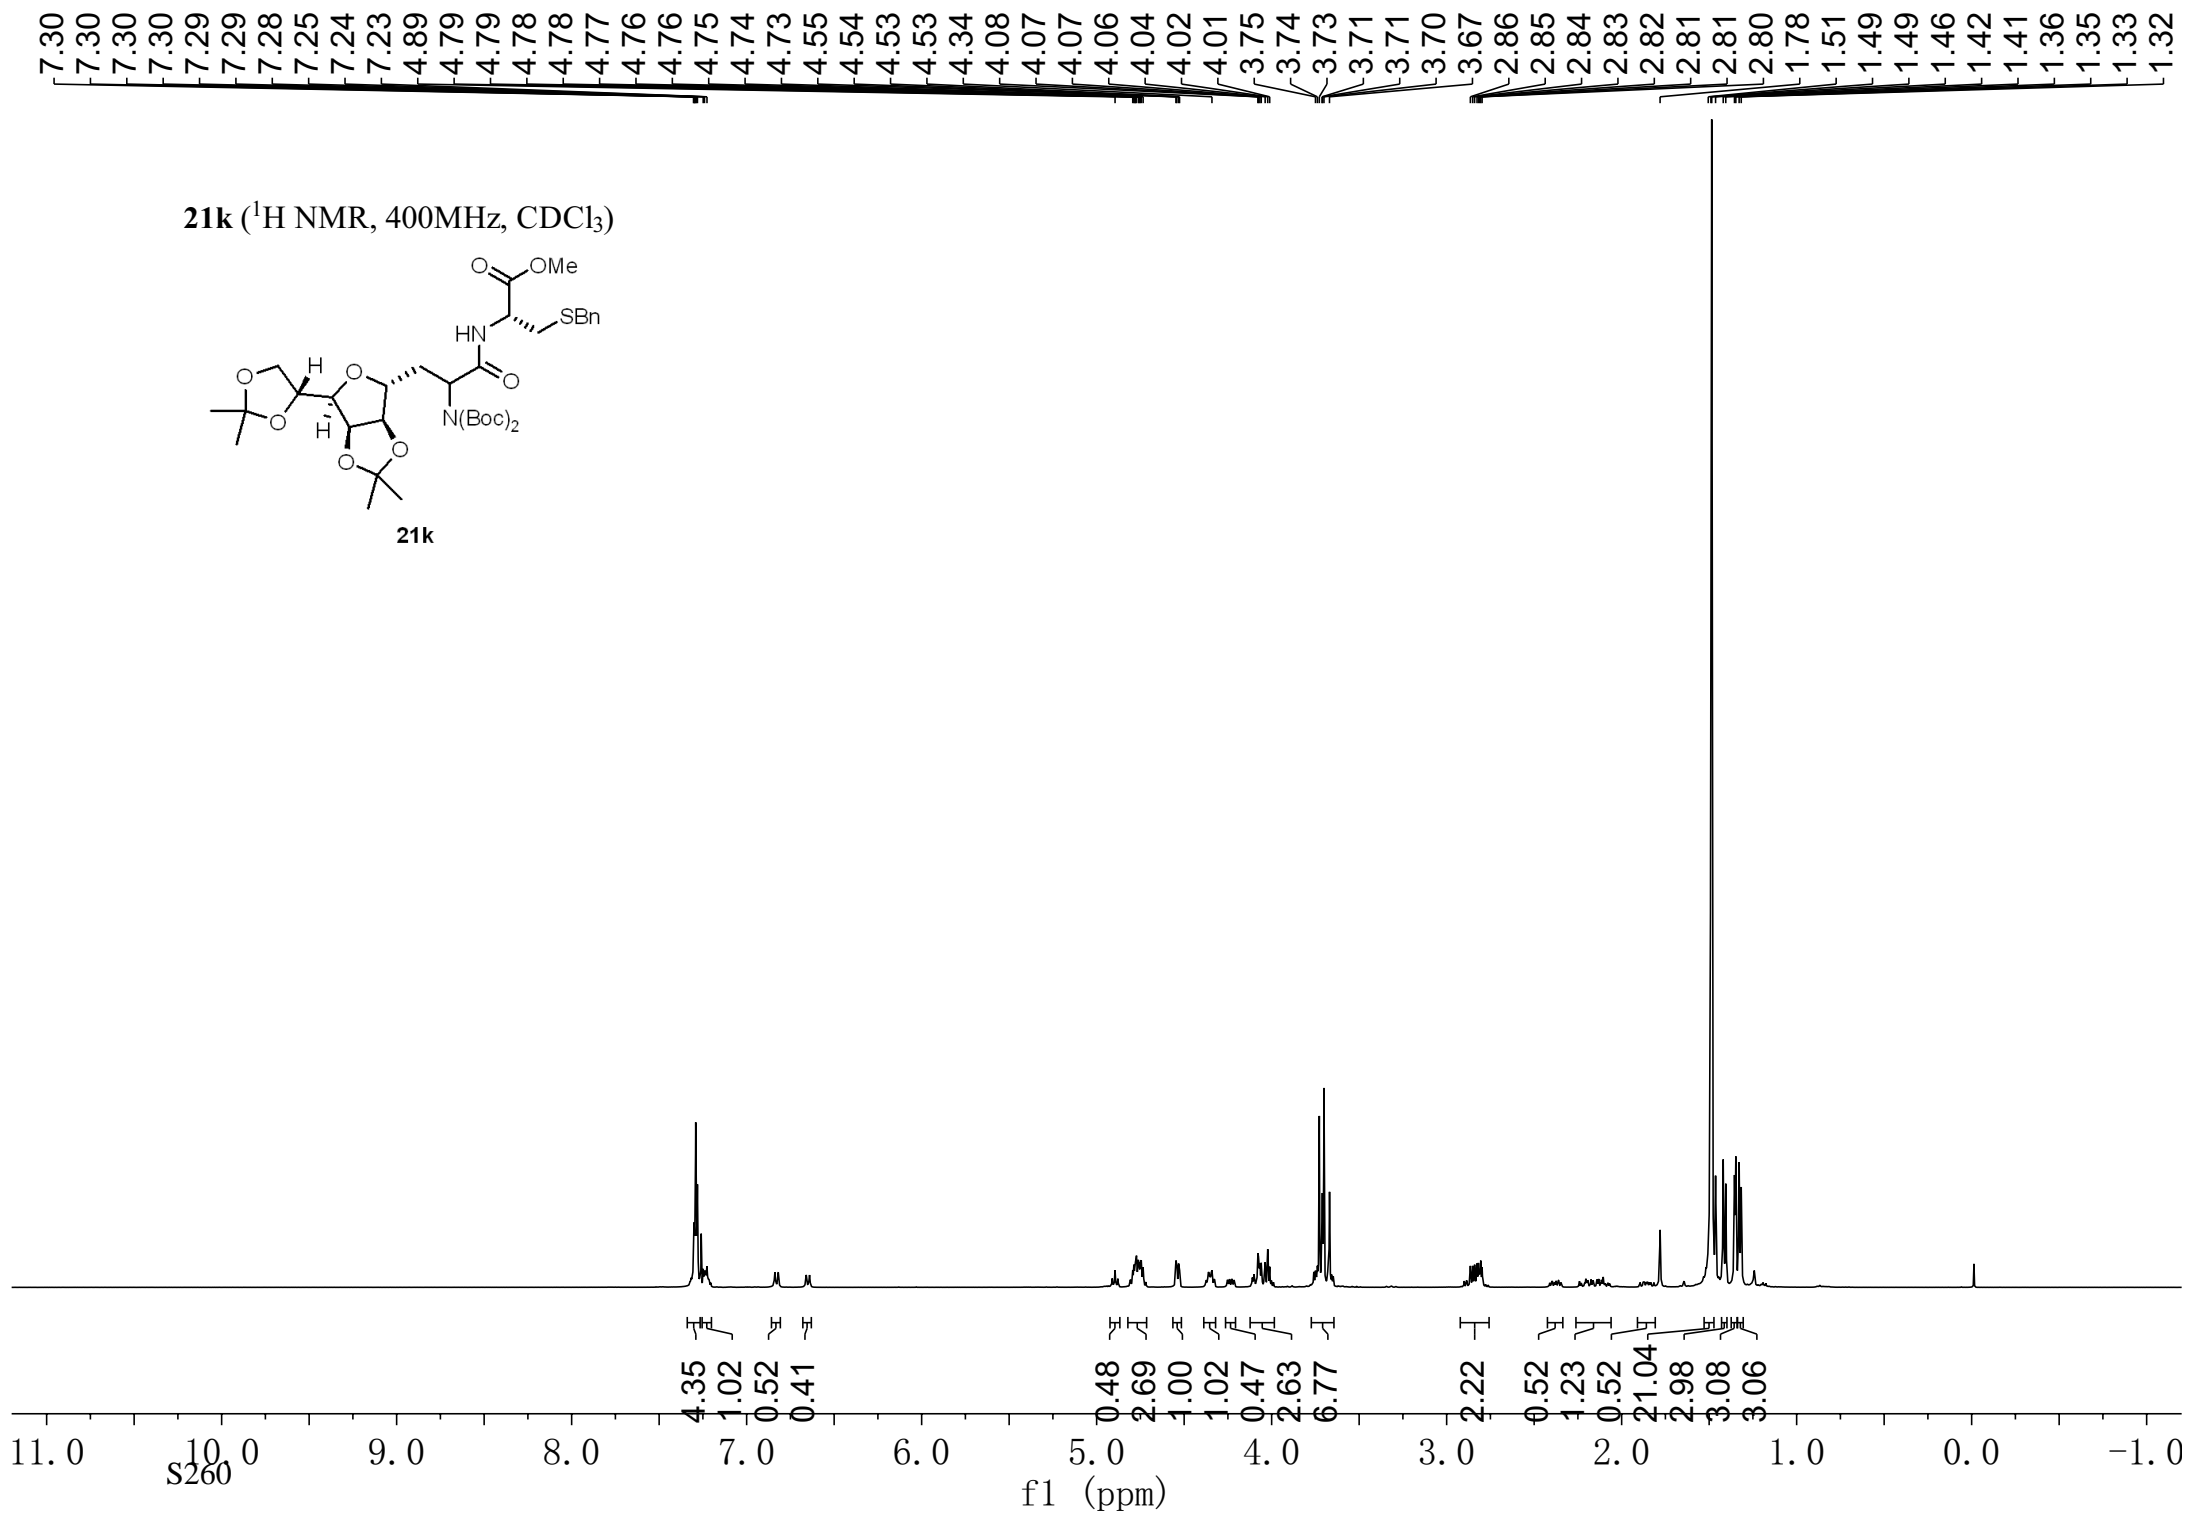

171.25  
171.04  
170.20  
169.81

152.48  
152.15

137.63  
137.57  
129.04  
129.00  
128.63  
127.29  
127.26

112.73  
112.68  
109.31  
109.25

85.52  
85.42  
83.98  
83.74  
82.75

80.86  
80.80  
80.74  
80.48  
80.12  
77.16  
73.35  
67.19  
56.90  
56.71  
52.68  
52.59  
51.96  
51.88  
36.60  
36.49  
28.06  
27.99  
27.03  
26.24  
26.20  
25.29  
25.27  
24.90  
24.83

21k (<sup>13</sup>C NMR, 101MHz, CDCl<sub>3</sub>)

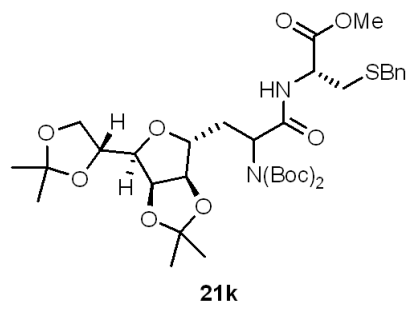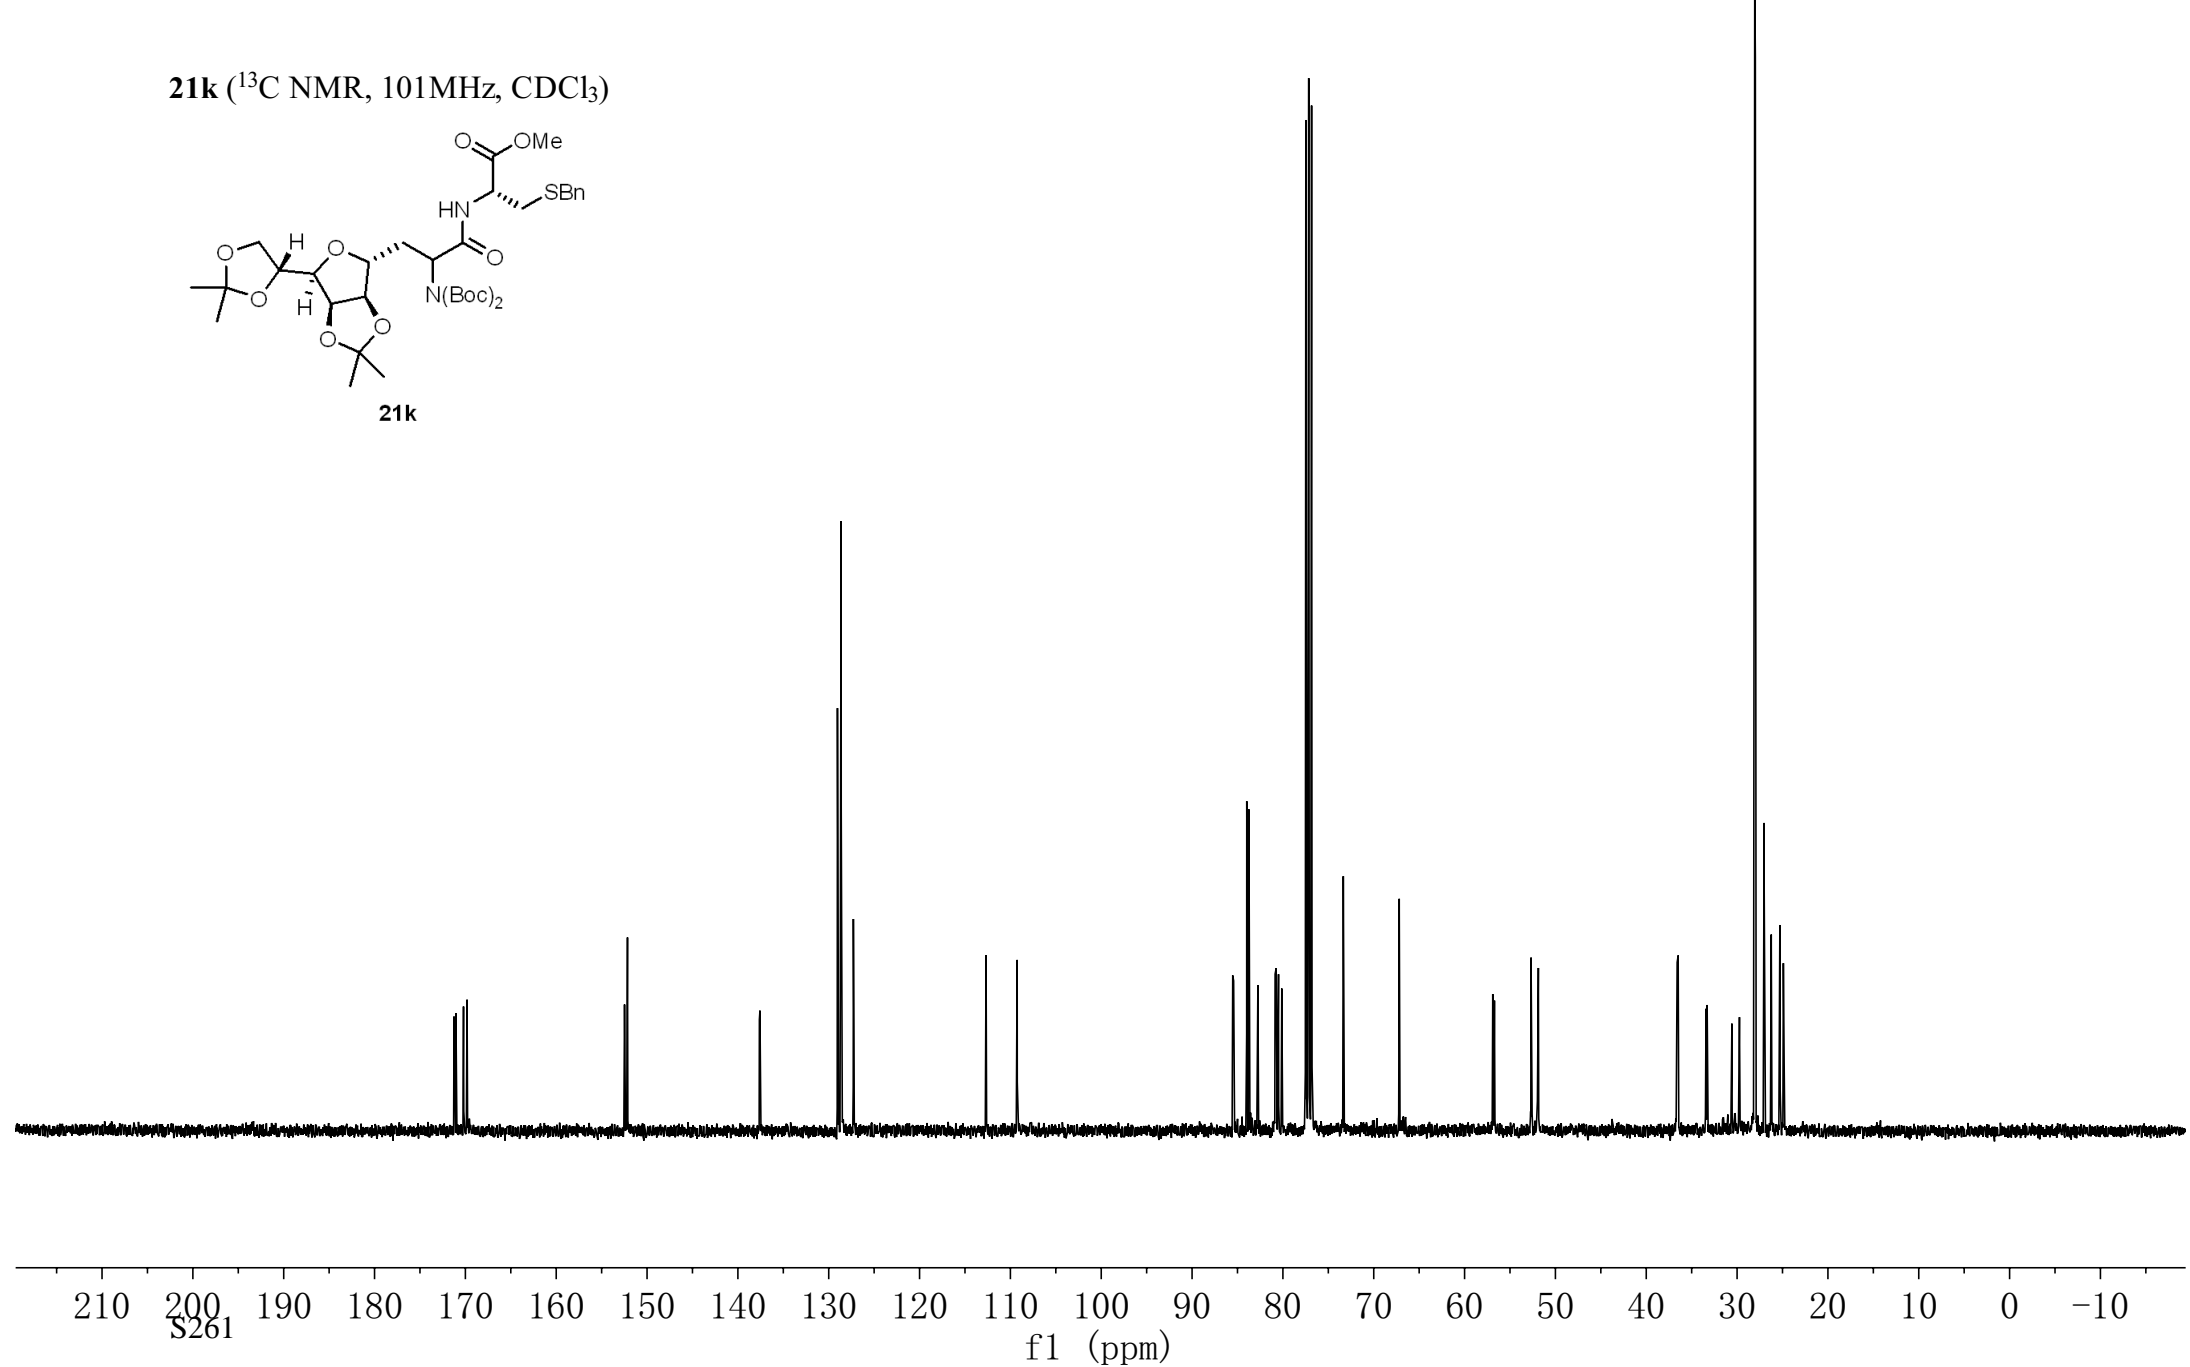





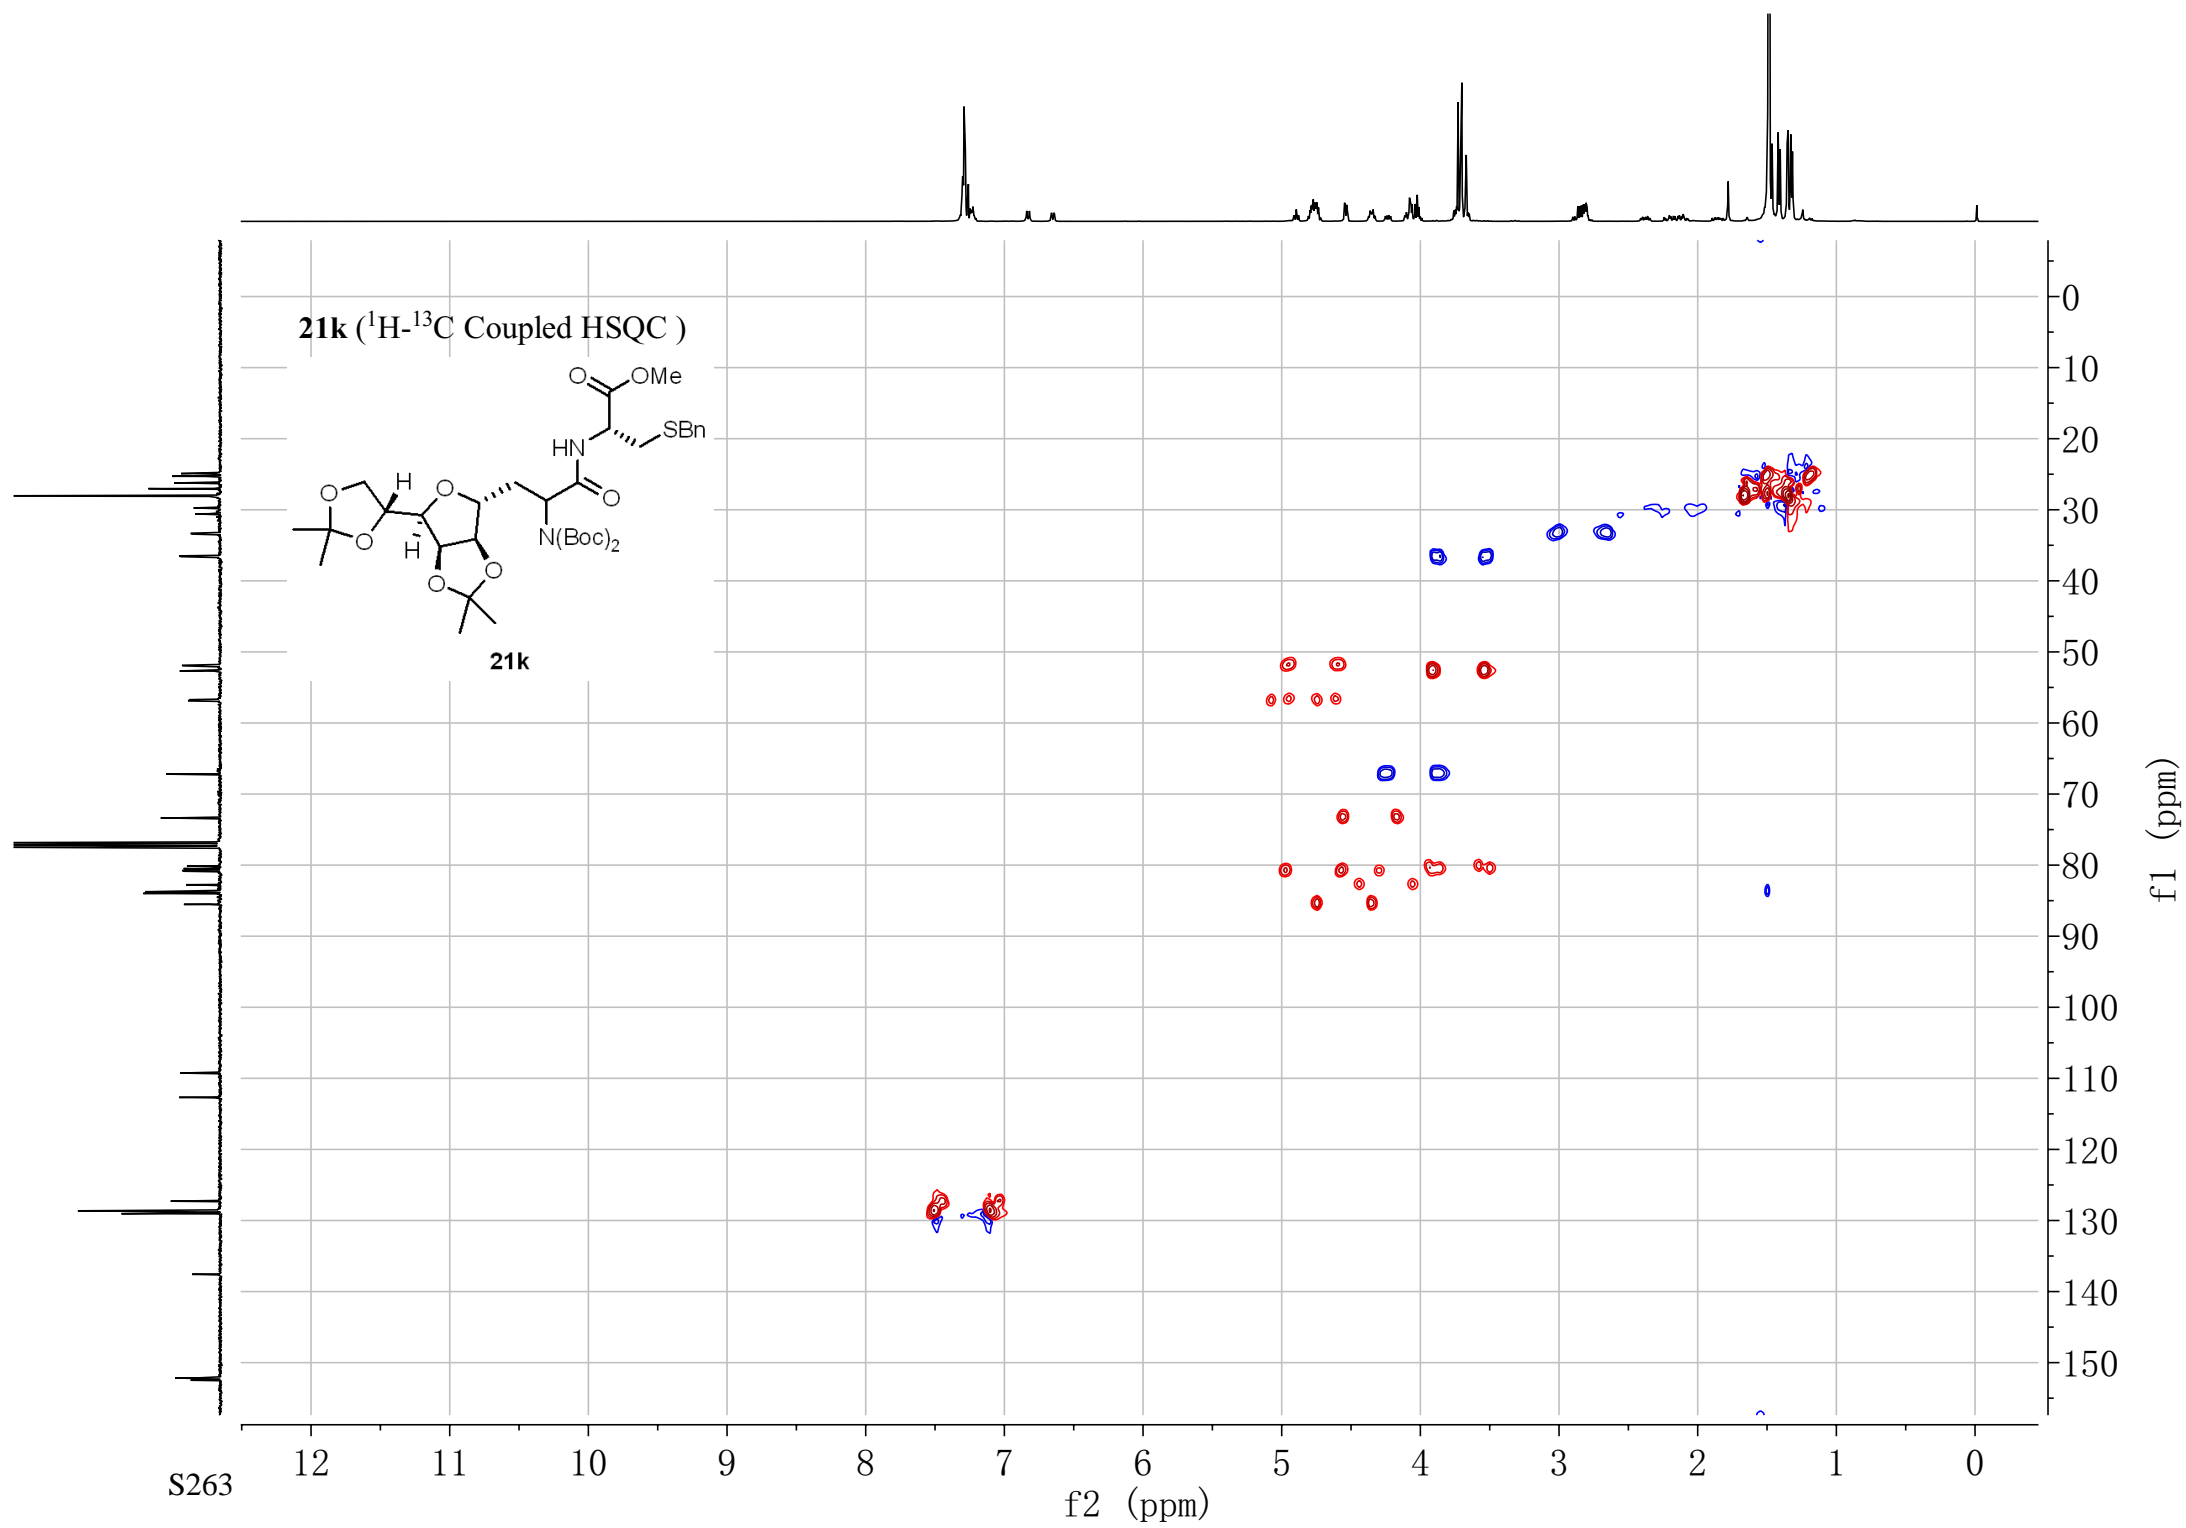

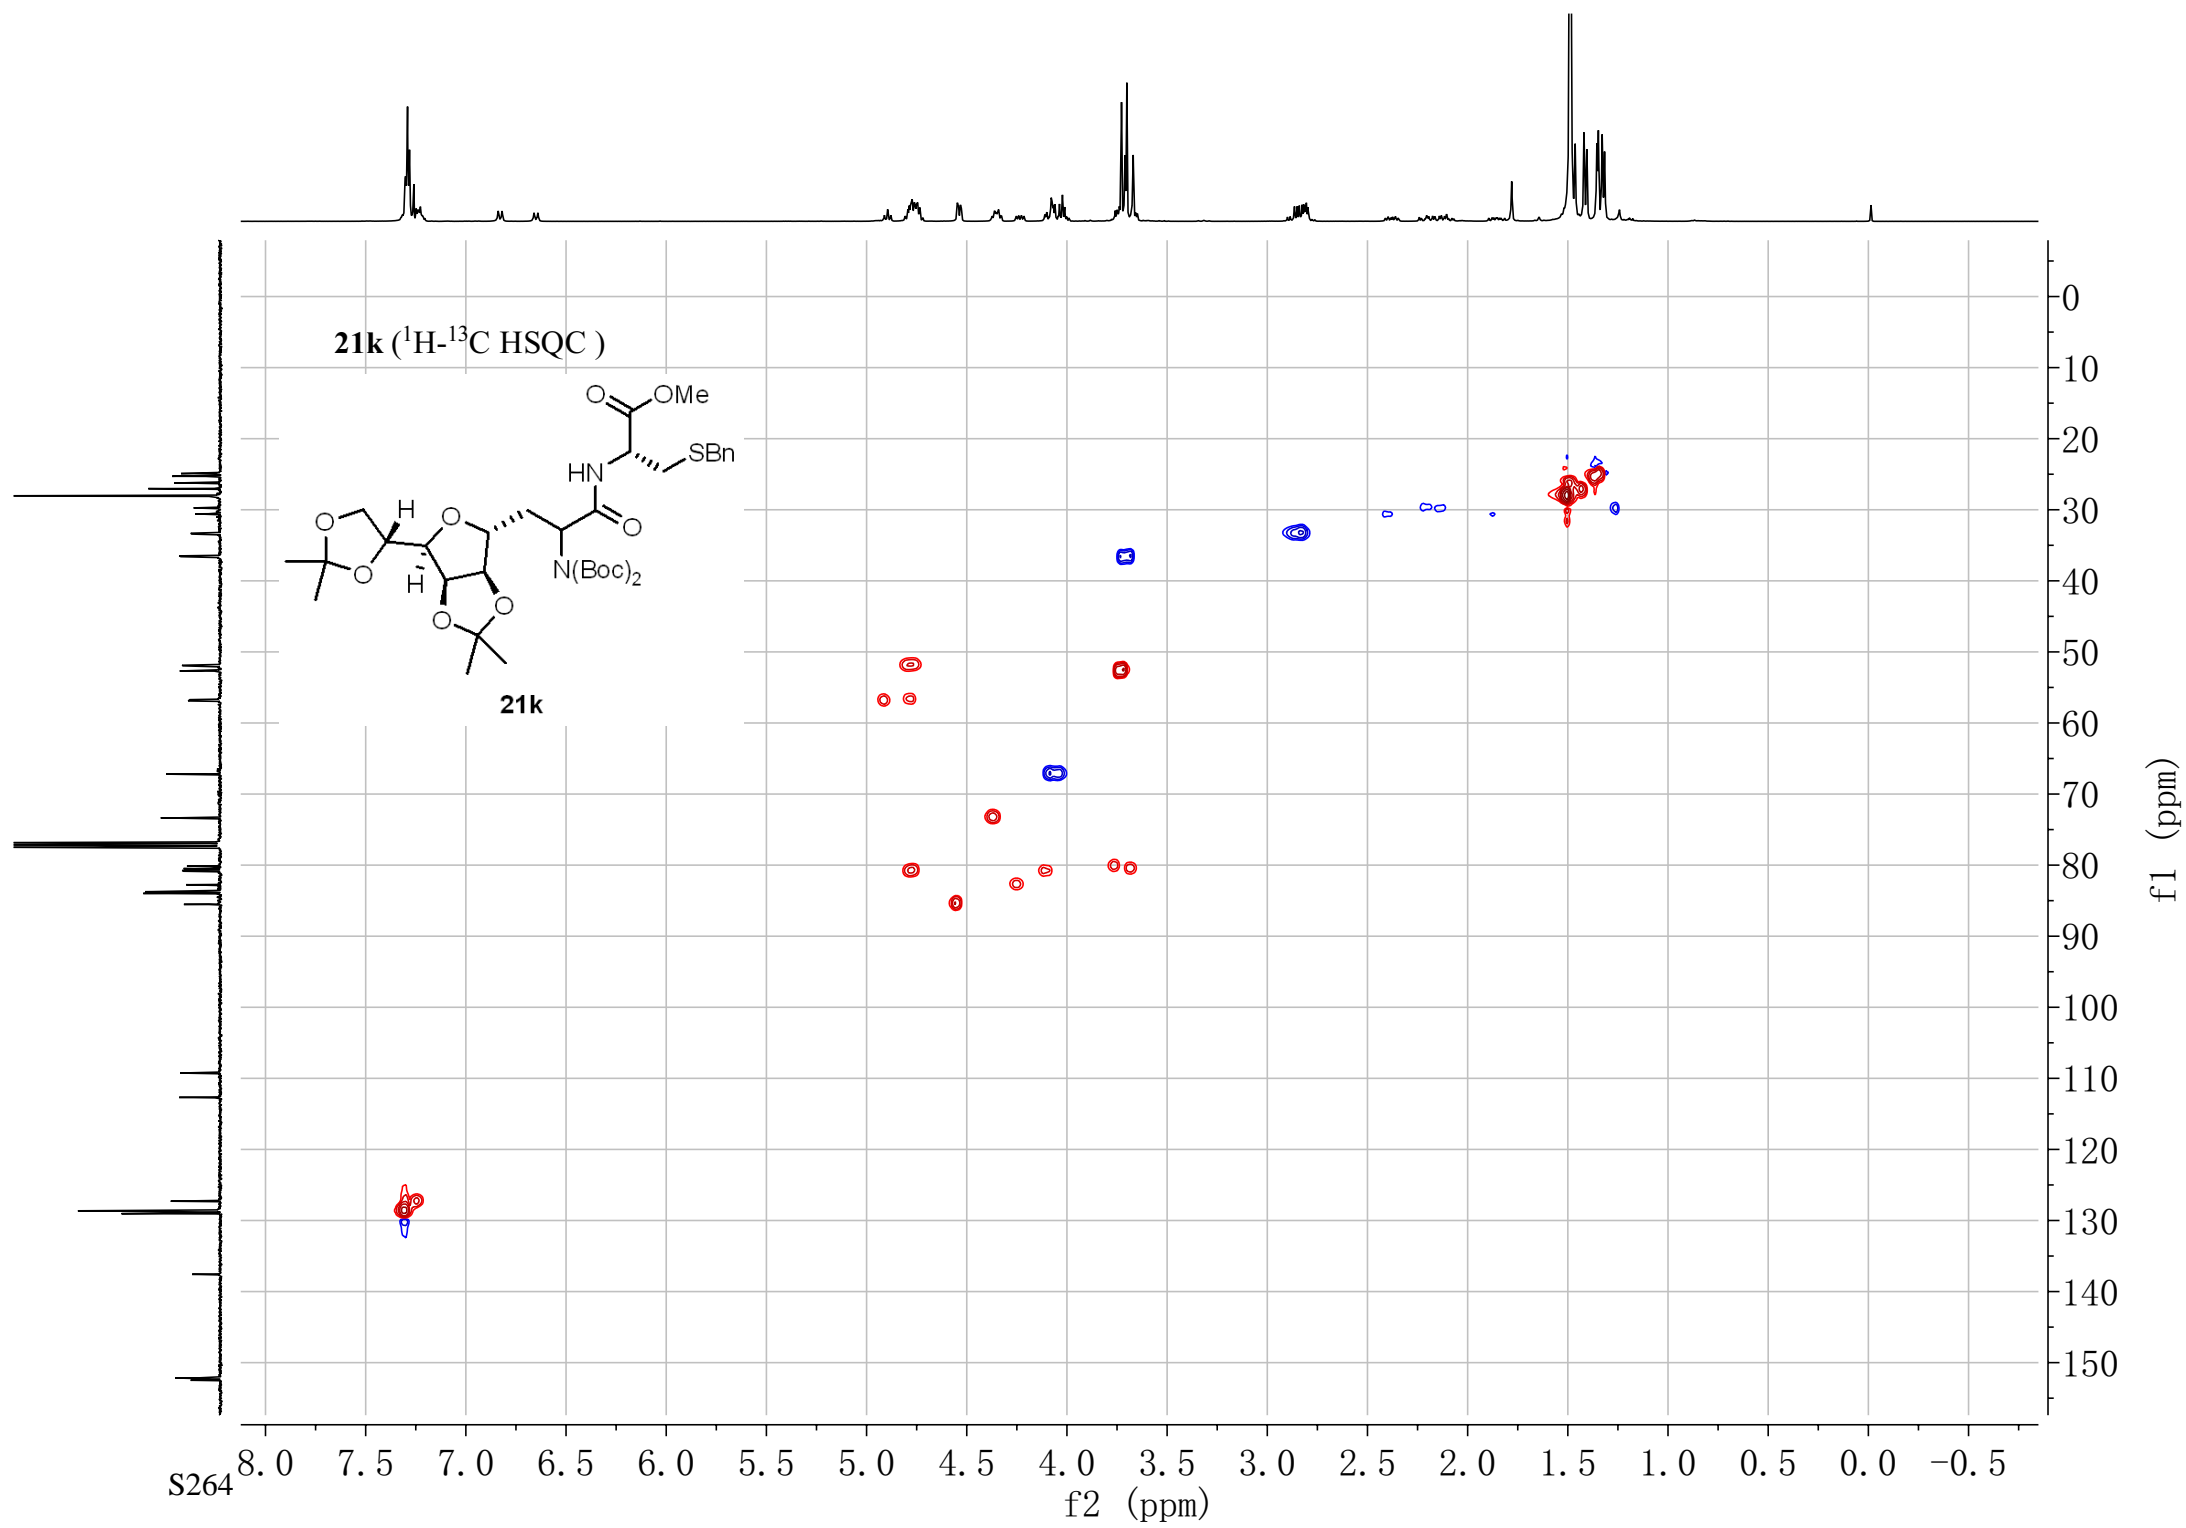

8.15  
7.53  
7.51  
7.34  
7.32  
7.18  
7.18  
7.17  
7.16  
7.15  
7.14  
7.12  
7.12  
7.10  
7.00  
7.00  
6.49  
6.47  
4.89  
4.89  
4.88  
4.88  
4.87  
4.85  
4.76  
4.75  
4.74  
4.74  
4.54  
4.52  
4.38  
4.37  
4.36  
4.36  
4.25  
4.22  
4.10  
4.09  
4.07  
3.69  
3.68  
3.67  
3.66  
3.65  
3.64  
3.63  
3.62  
3.31  
3.29  
2.32  
1.48  
1.48  
1.43  
1.42  
1.40  
1.37  
1.33  
1.31  
1.31

211 (<sup>1</sup>H NMR, 400MHz, CDCl<sub>3</sub>)

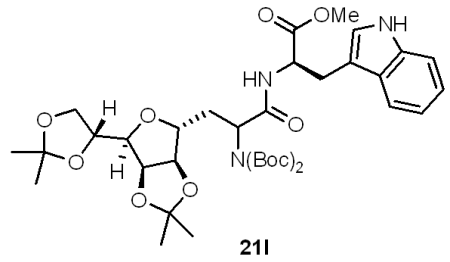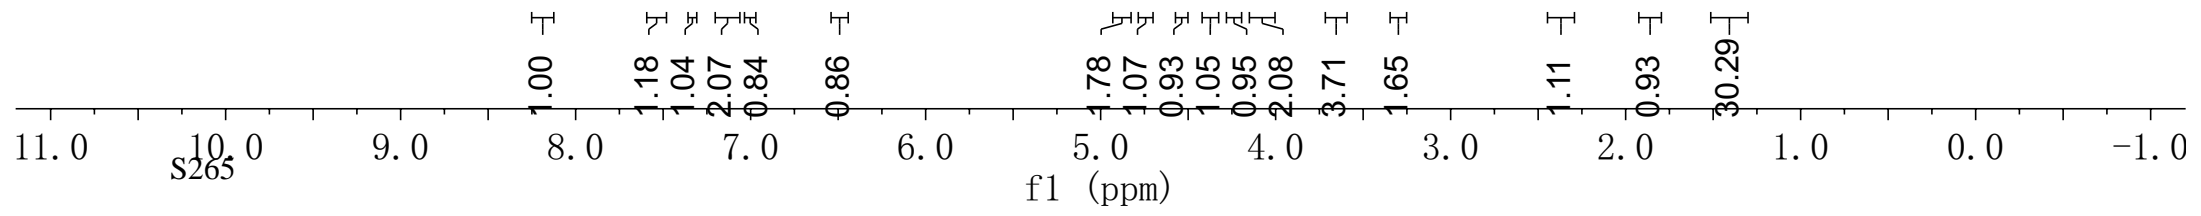

S265





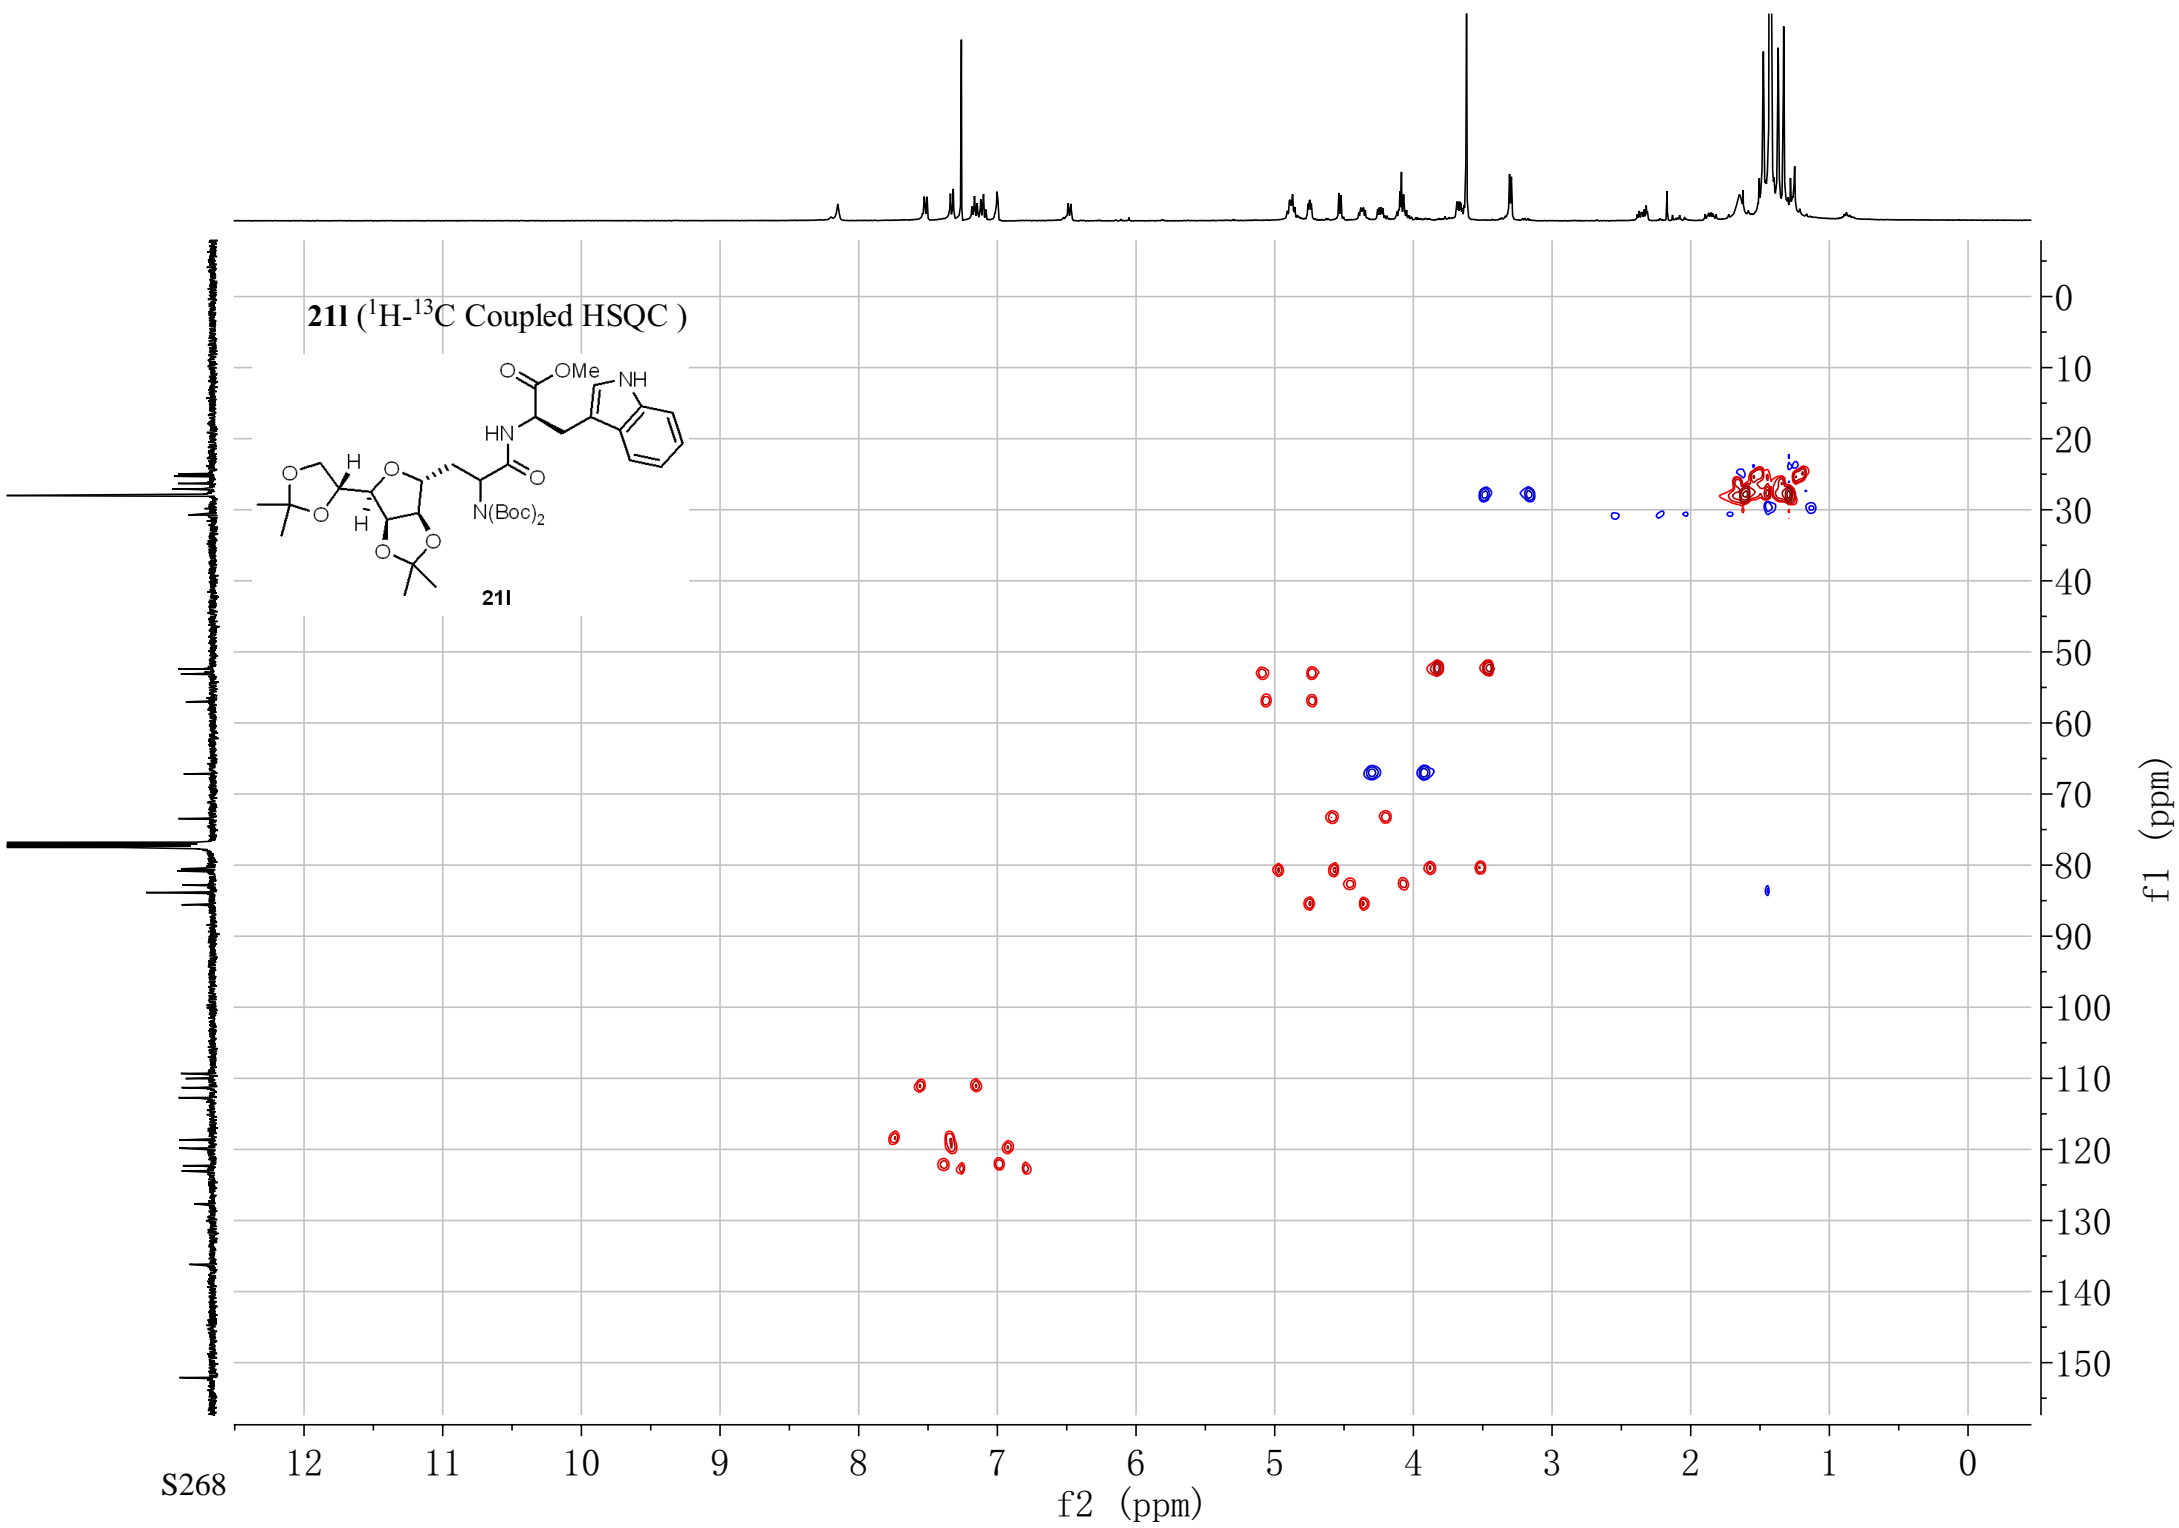





7.26  
6.50  
6.48  
6.18  
6.16  
4.81  
4.76  
4.75  
4.74  
4.73  
4.72  
4.54  
4.52  
4.35  
4.34  
4.34  
4.33  
4.27  
4.25  
4.25  
4.23  
4.06  
4.05  
4.04  
4.03  
4.02  
3.72  
3.71  
3.70  
3.66  
3.65  
3.64  
3.63  
1.85  
1.82  
1.81  
1.65  
1.63  
1.61  
1.60  
1.58  
1.56  
1.56  
1.53  
1.50  
1.48  
1.45  
1.43  
1.40  
1.35  
1.32  
1.31  
0.93  
0.91  
0.90  
0.89  
0.89  
0.88  
0.86

**21m** (<sup>1</sup>H NMR, 400MHz, CDCl<sub>3</sub>)

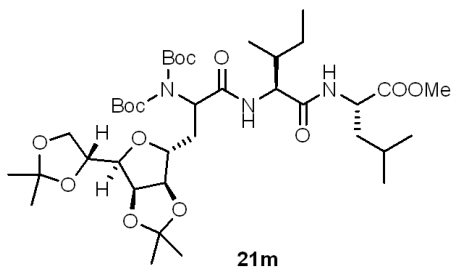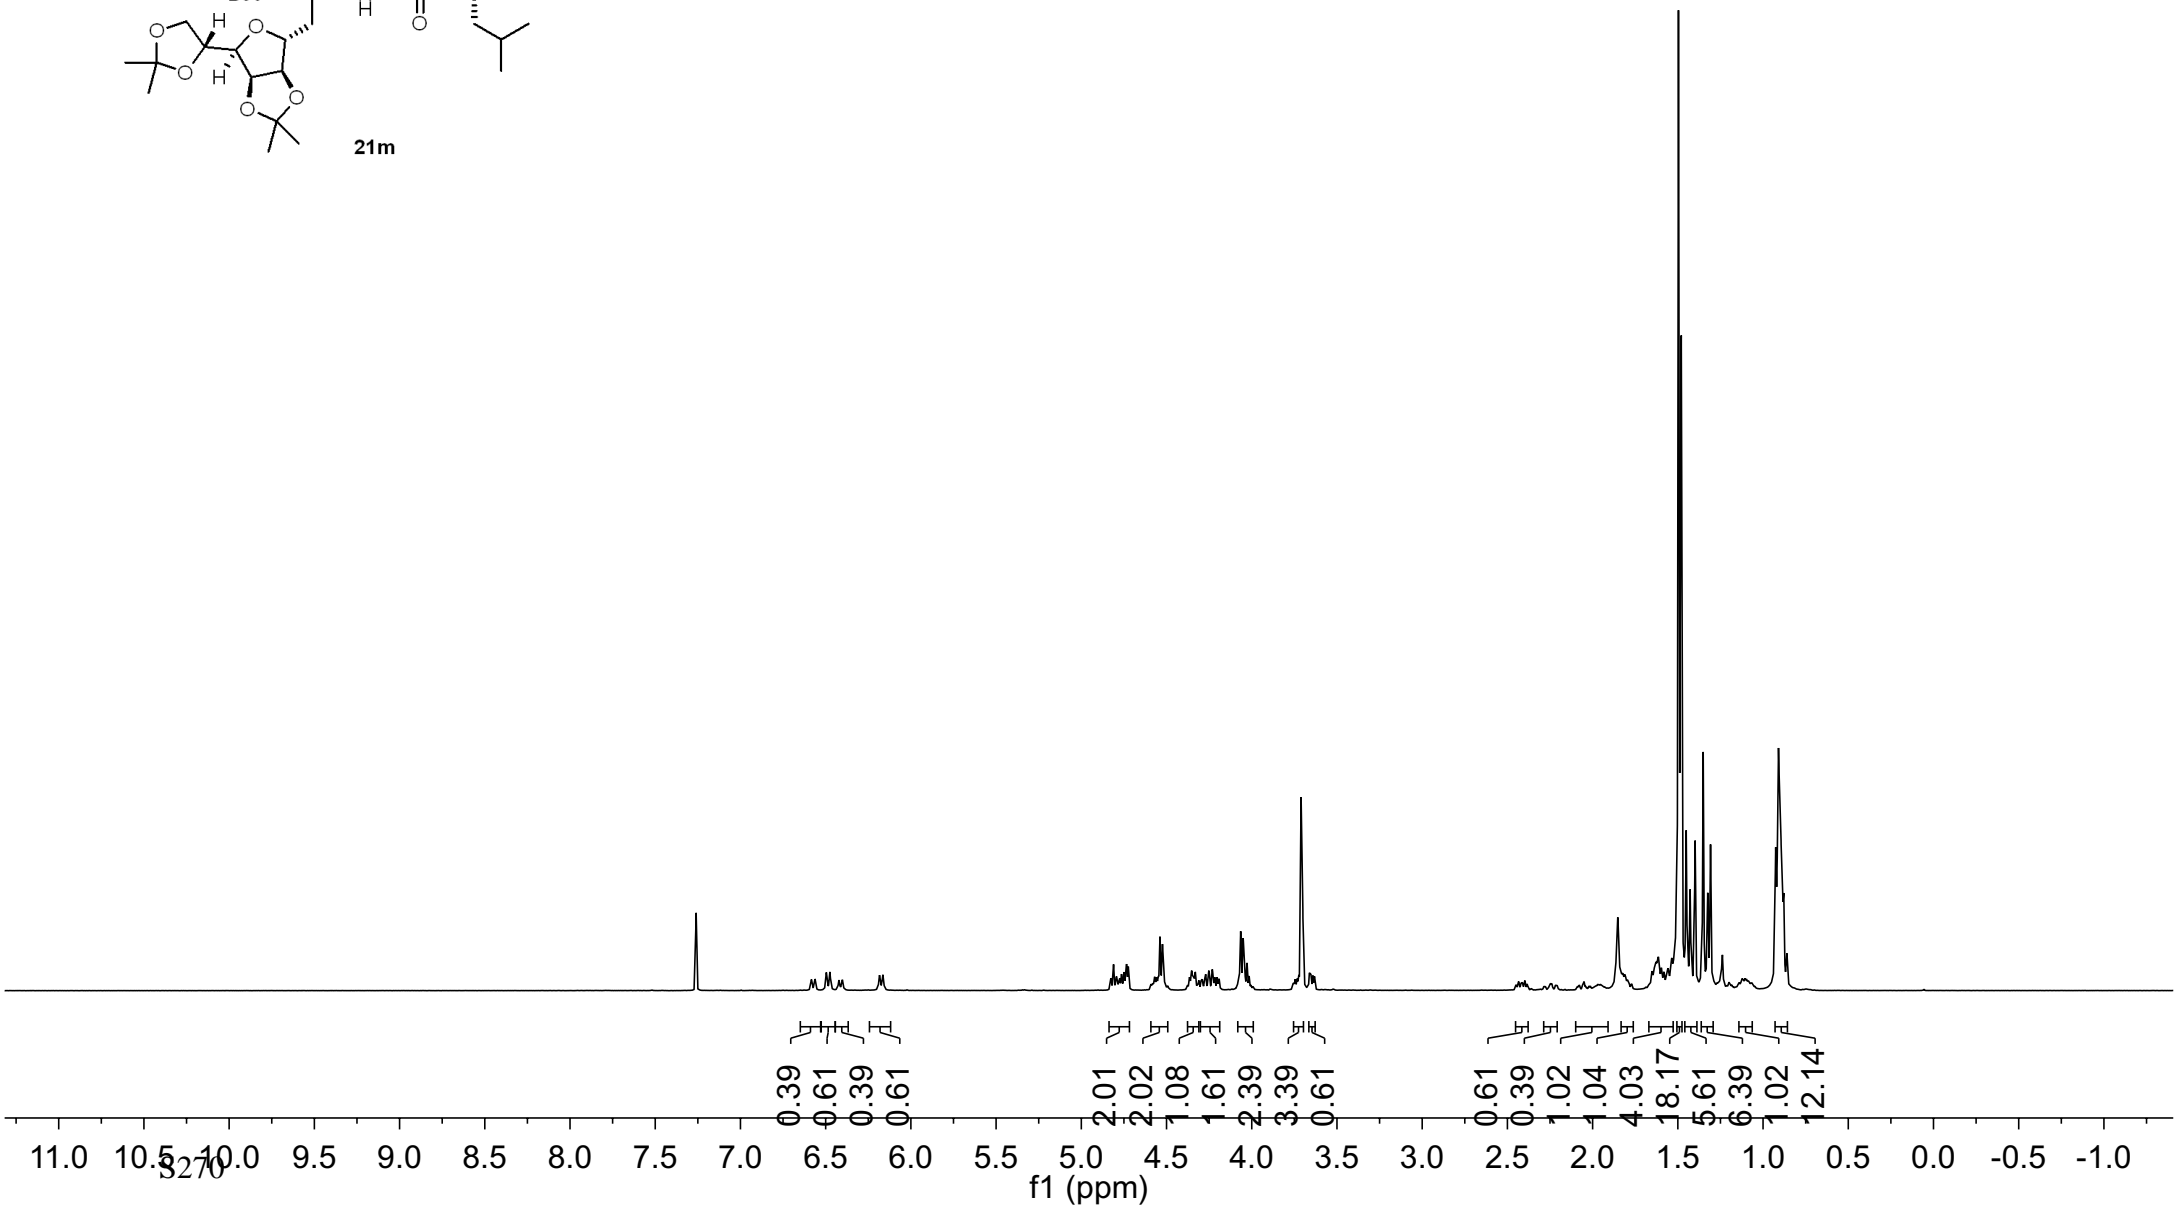

173.15  
170.75  
170.68  
170.41  
169.92  
152.70  
152.38  
112.75  
112.68  
109.44  
109.31  
85.59  
85.48  
84.07  
83.89  
82.83  
80.87  
80.76  
80.59  
80.51  
80.19  
77.48  
77.16  
76.84  
73.37  
67.32  
67.26  
57.95  
57.85  
57.00  
56.92  
52.40  
52.33  
50.90  
50.87  
41.37  
41.26  
37.42  
37.10  
30.63  
28.08  
28.01  
27.08  
27.03  
26.24  
26.22  
25.32  
25.30  
24.95  
24.90  
24.82  
22.88  
22.84  
22.02  
21.92  
15.63  
15.41  
11.62  
11.46

**21m** (<sup>13</sup>C NMR, 101MHz, CDCl<sub>3</sub>)

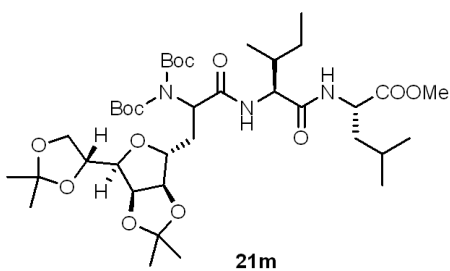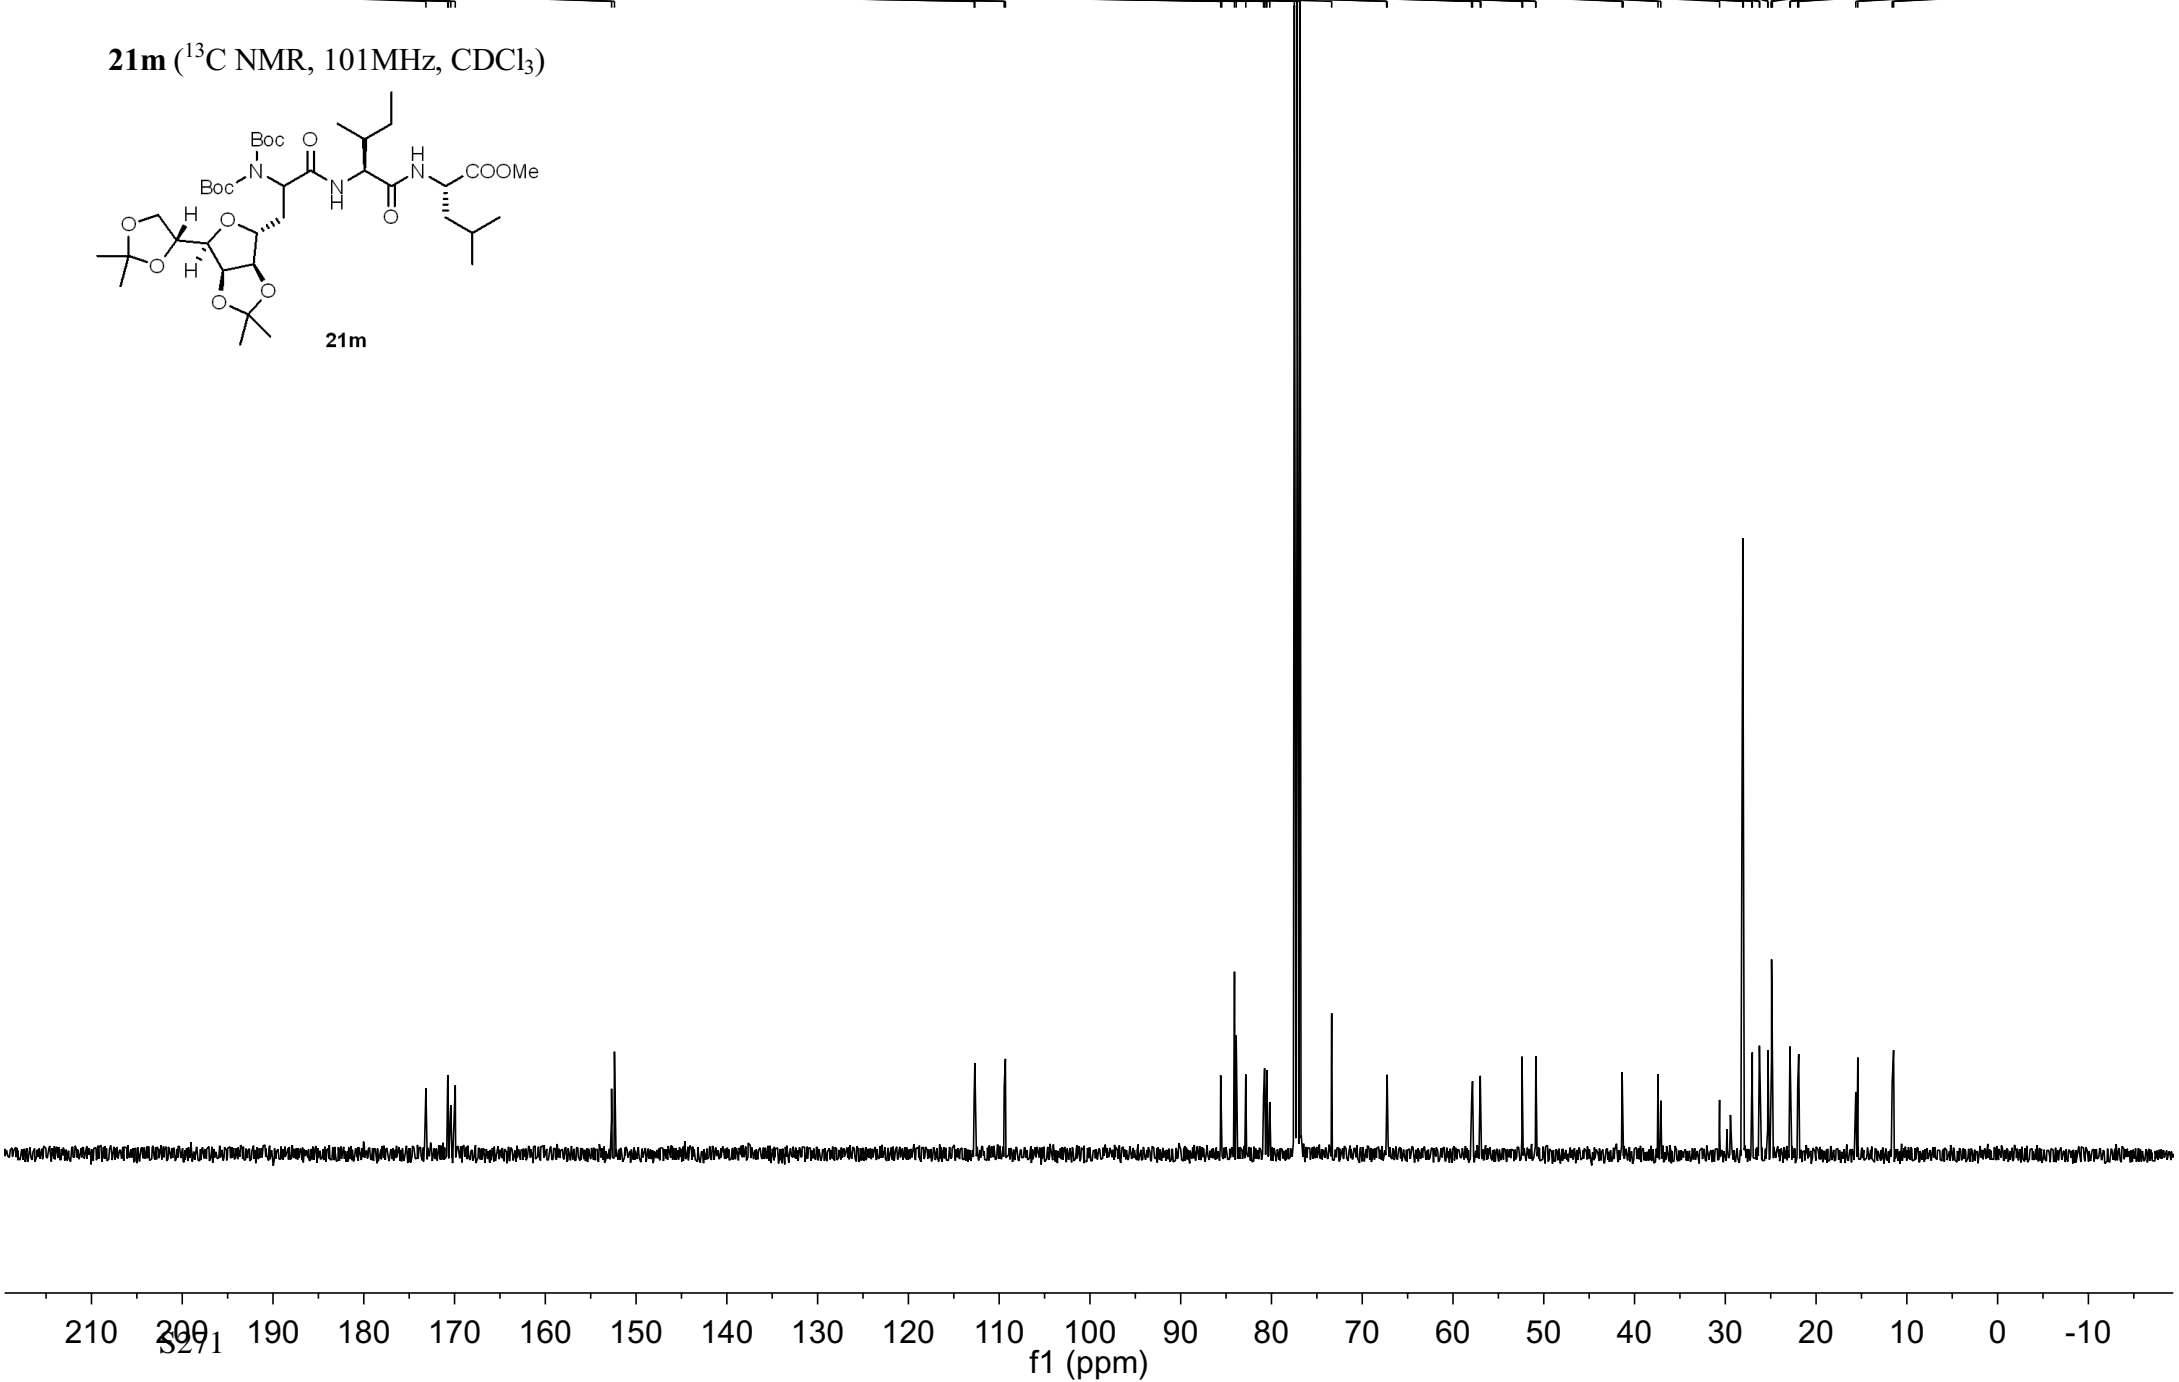

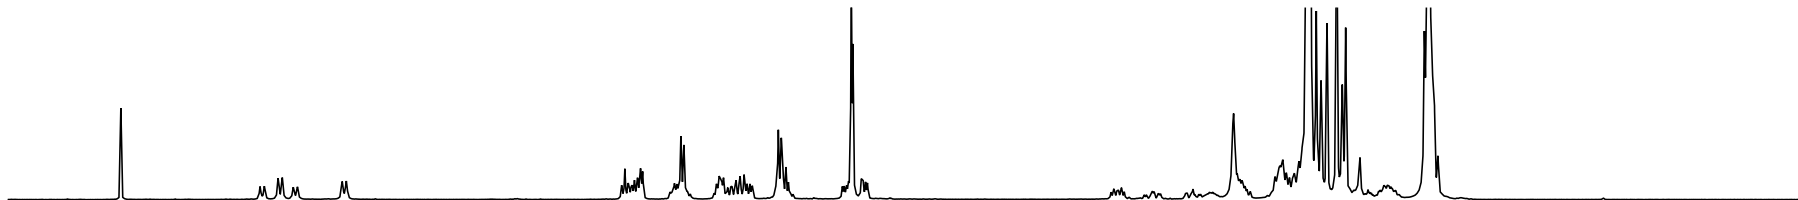

**21m** ( $^1\text{H} - ^1\text{H}$  COSY)

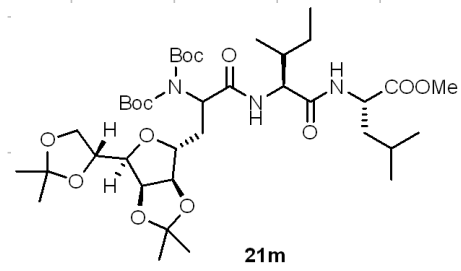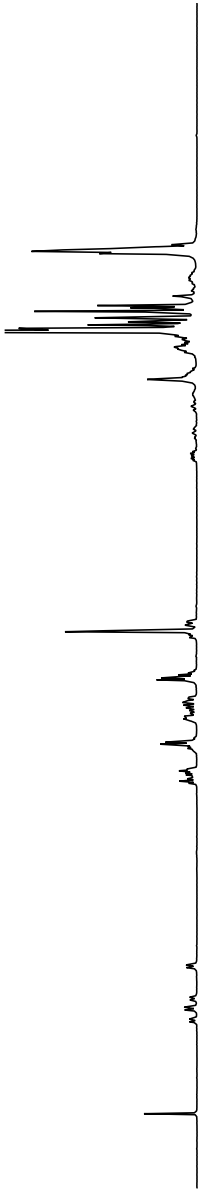

S272

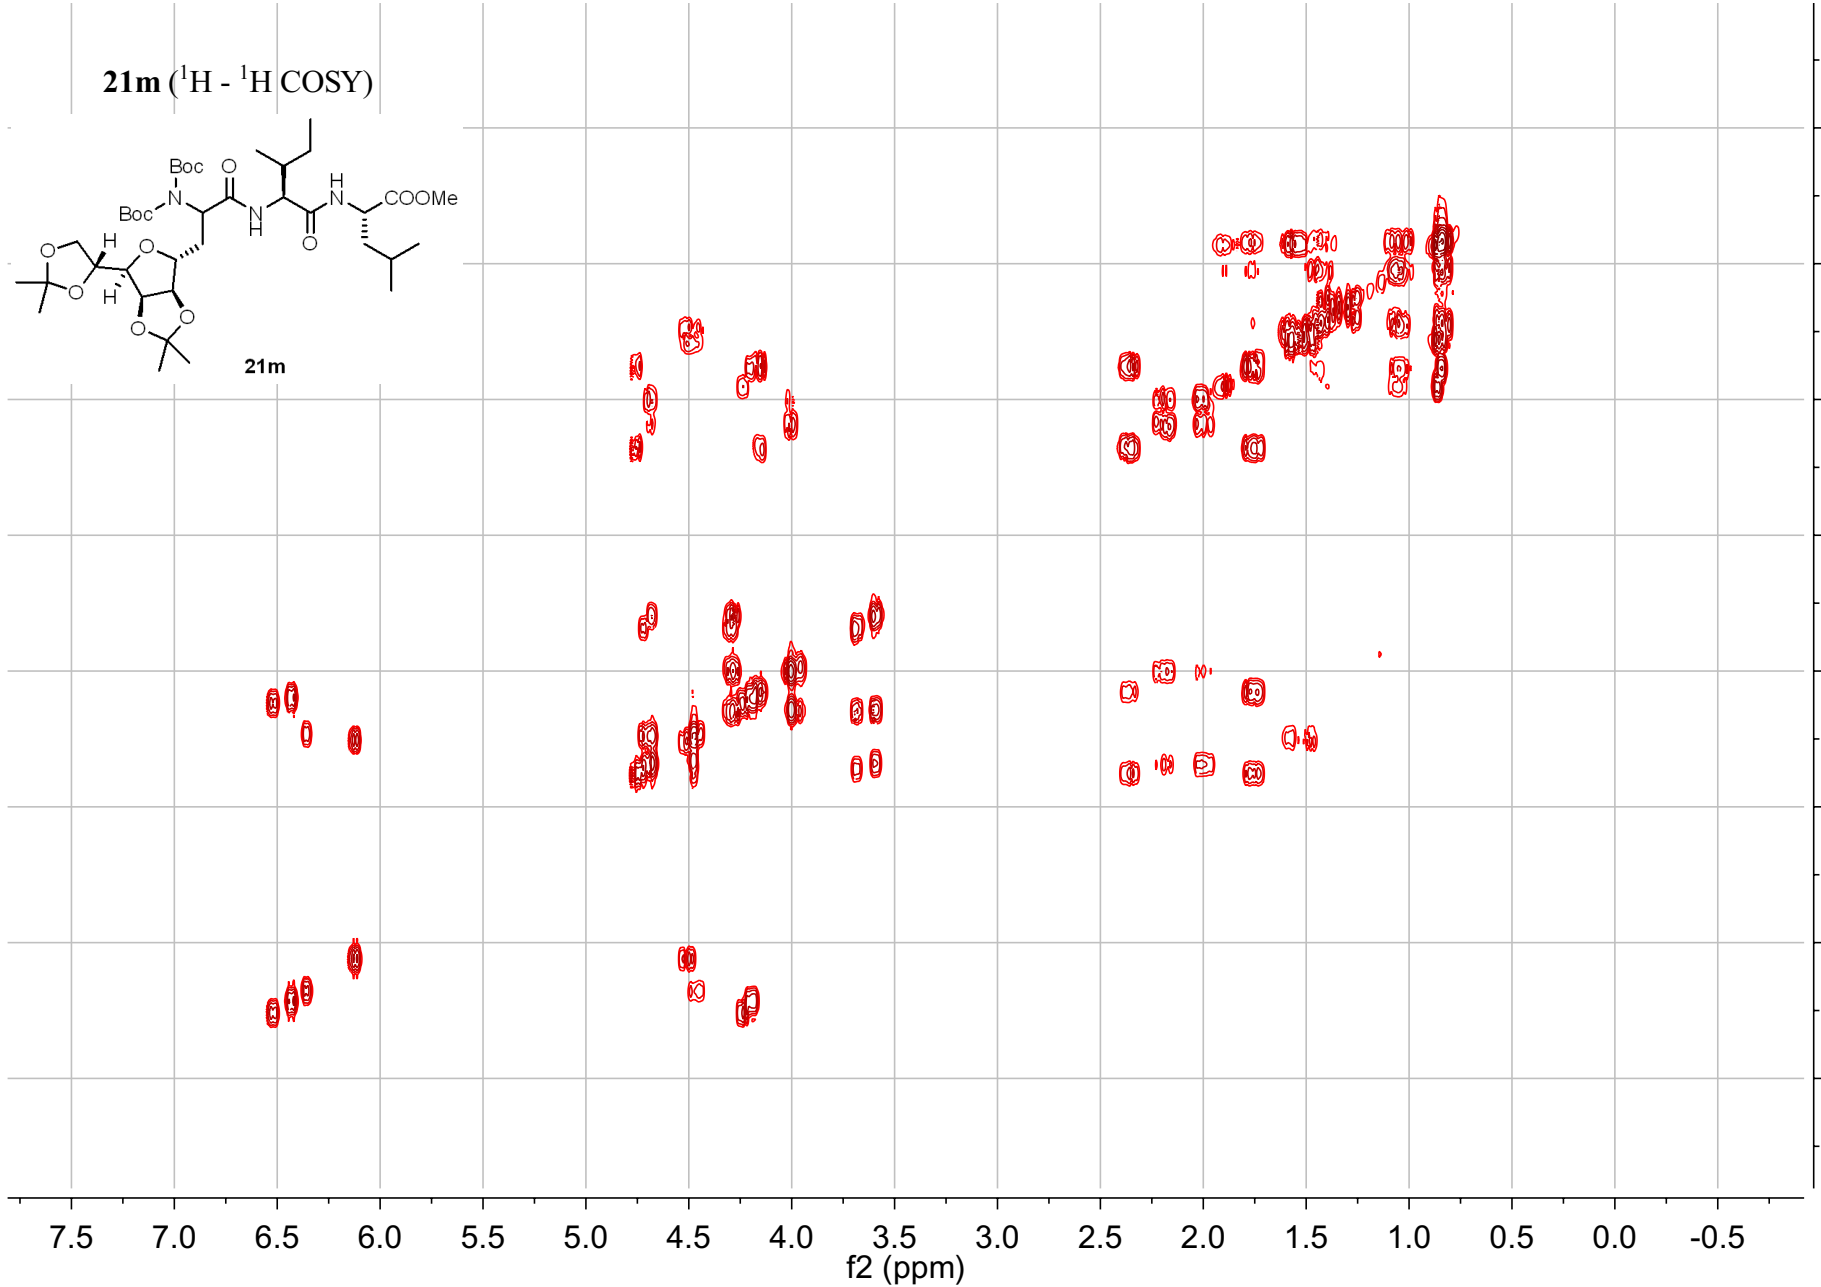

f1 (ppm)

f2 (ppm)



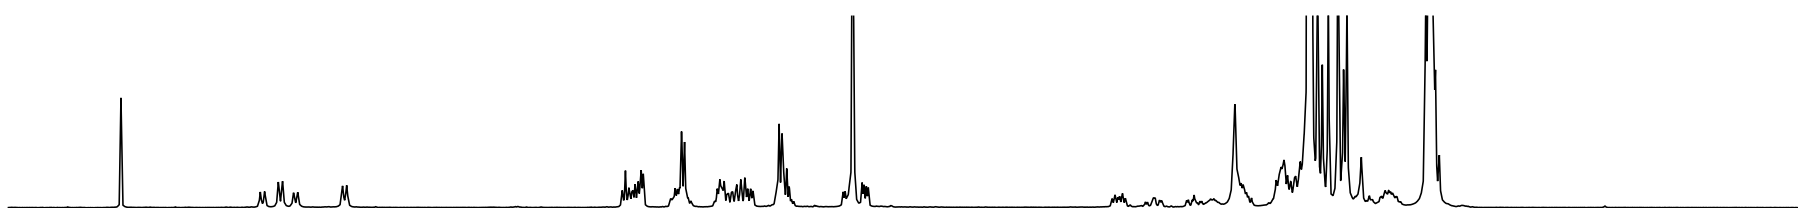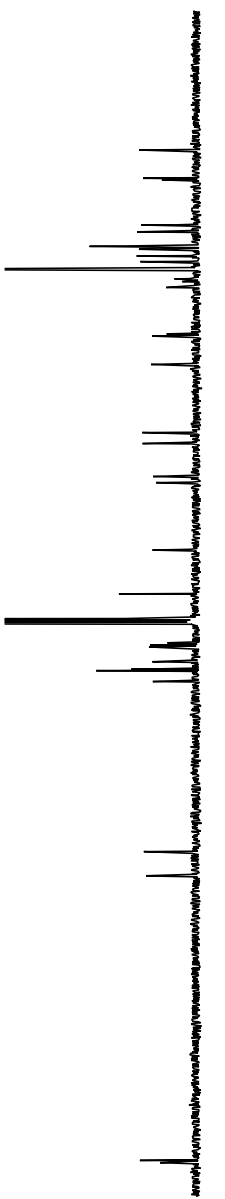

**21m** (<sup>1</sup>H - <sup>13</sup>C HSQC)

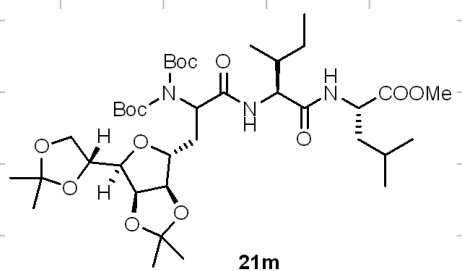

**21m**

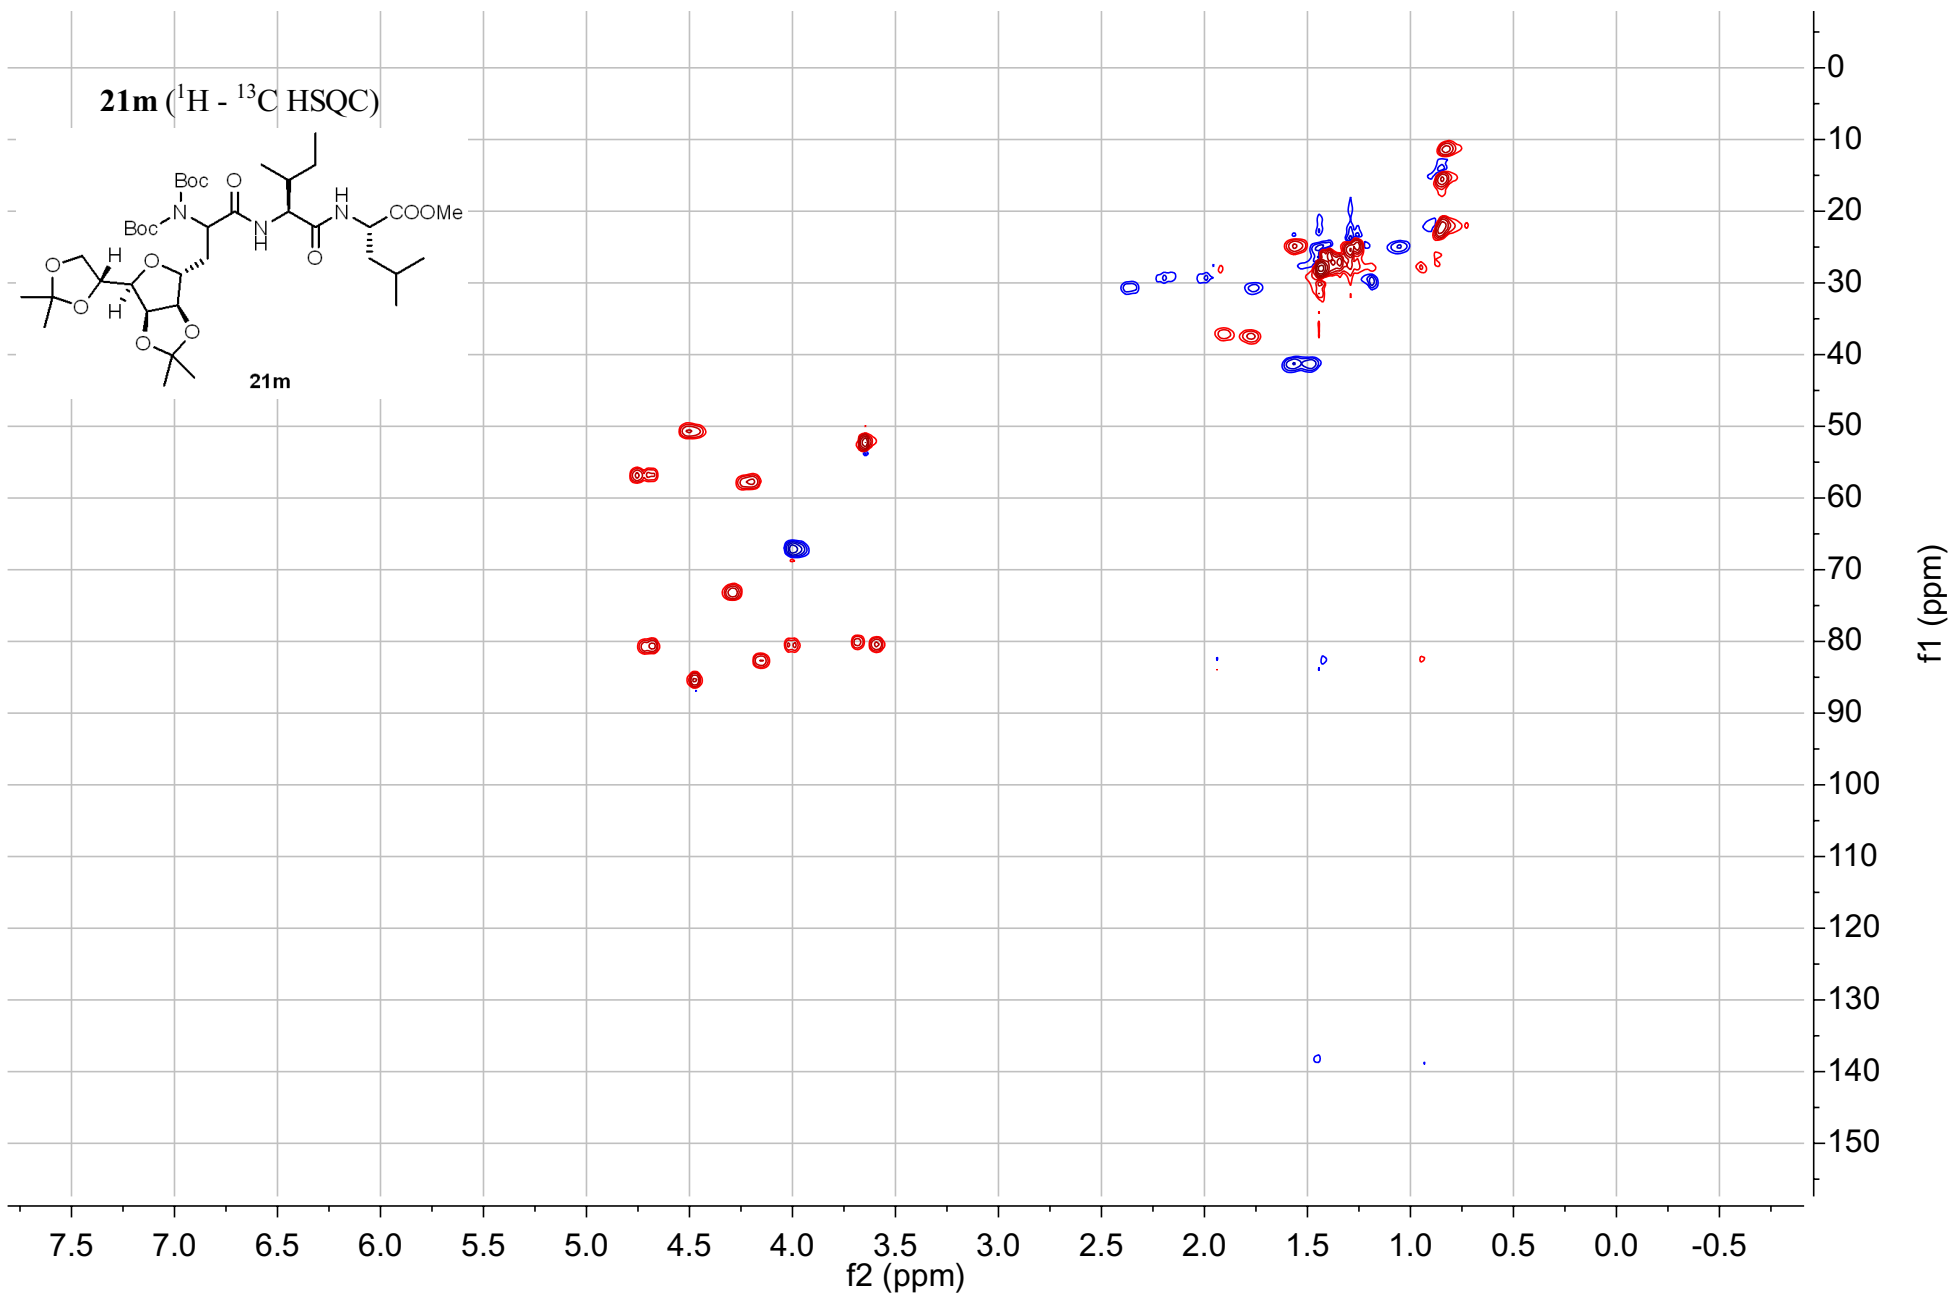

S274

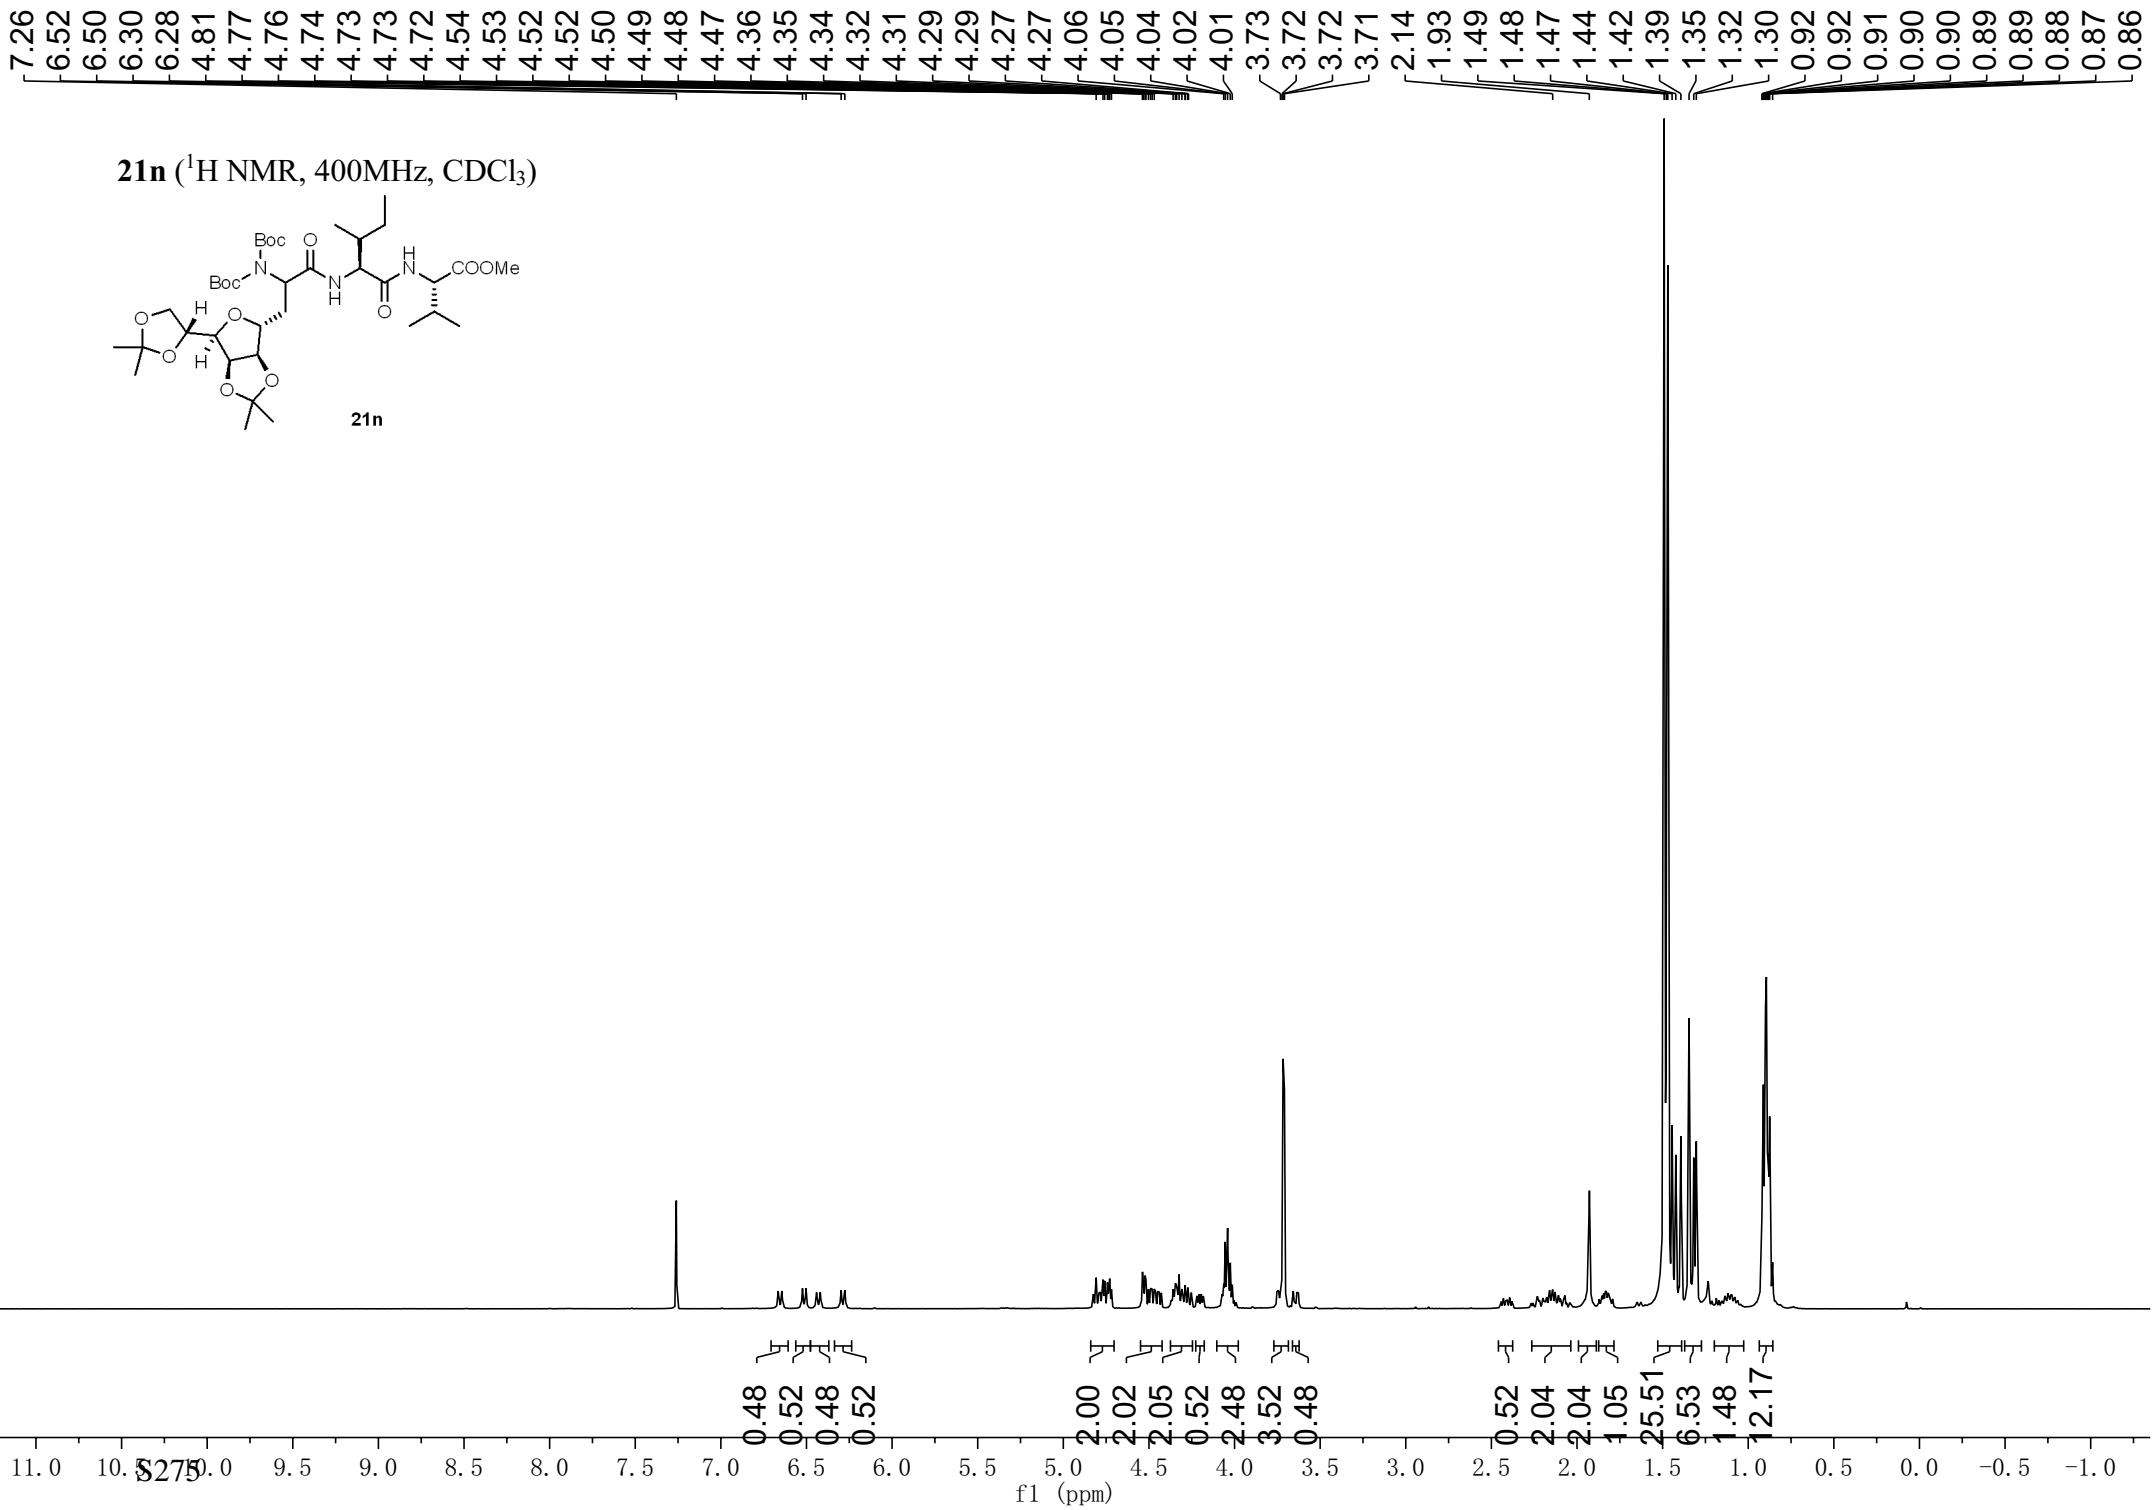

172.15  
170.88  
170.79  
170.47  
169.95  
152.65  
152.37  
112.73  
112.68  
109.43  
109.29  
85.60  
85.48  
84.06  
83.81  
82.88  
80.86  
80.78  
80.62  
80.50  
80.18  
77.48  
77.16  
76.84  
73.36  
67.31  
67.23  
58.03  
58.00  
57.42  
57.25  
57.12  
56.93  
52.27  
52.20  
37.34  
37.18  
31.16  
31.00  
30.54  
28.06  
28.00  
27.07  
27.02  
26.25  
26.21  
25.31  
25.29  
24.97  
24.95  
24.90  
24.80  
19.05  
18.09  
17.86  
15.58  
15.45  
11.58  
11.46

**21n** ( $^{13}\text{C}$  NMR, 101MHz,  $\text{CDCl}_3$ )

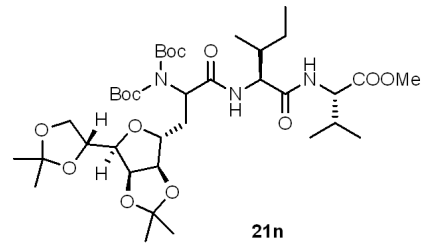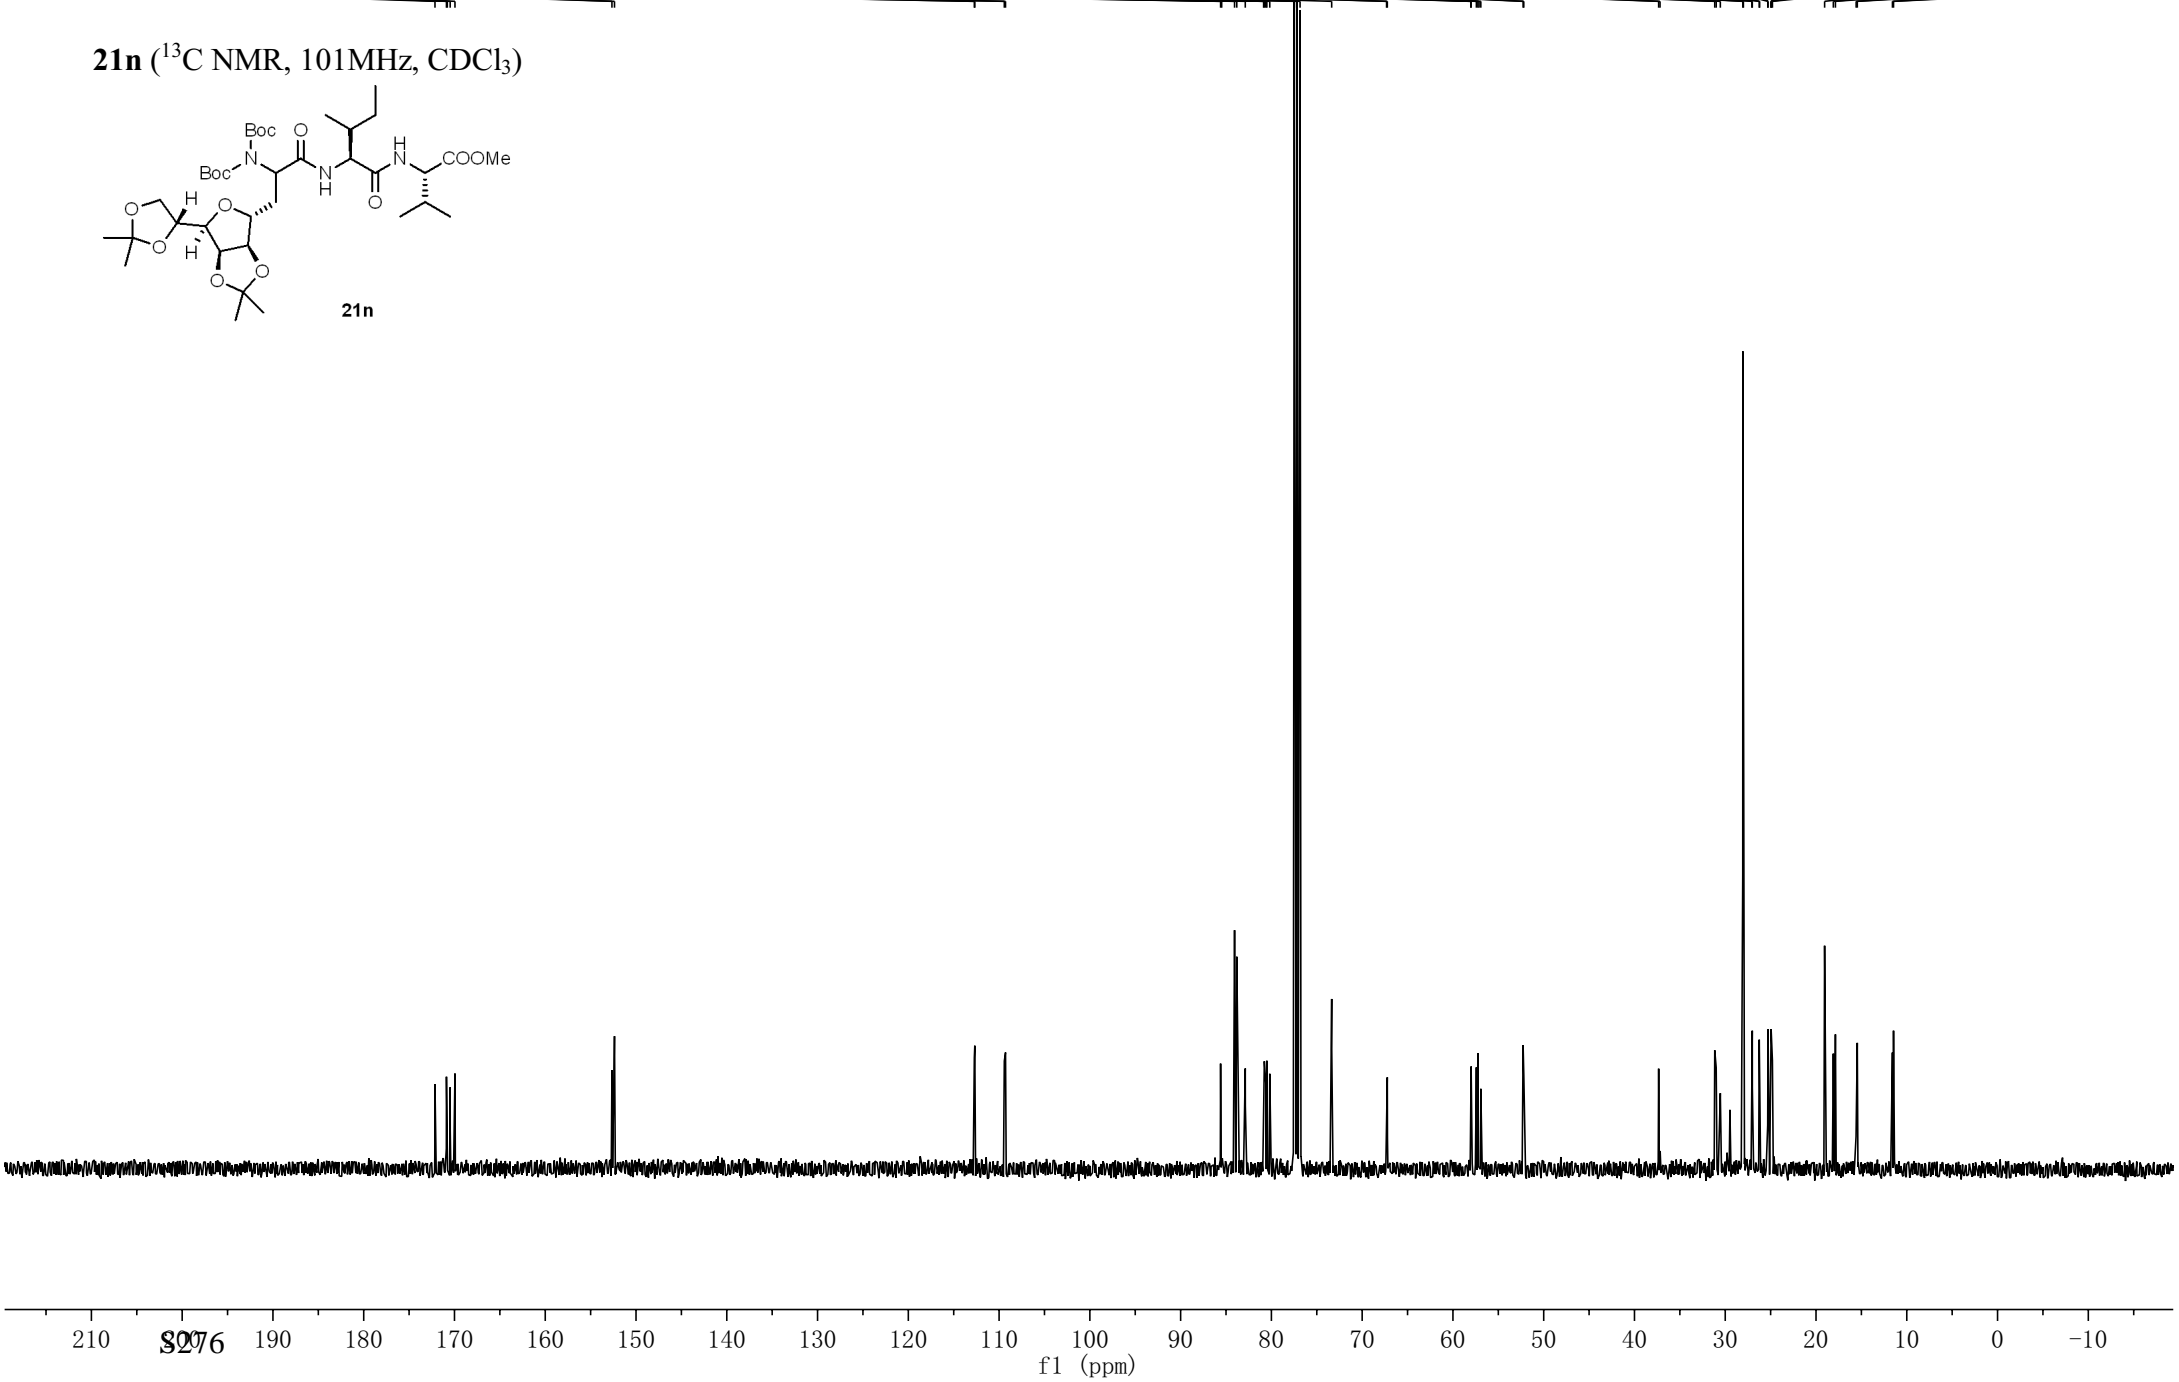

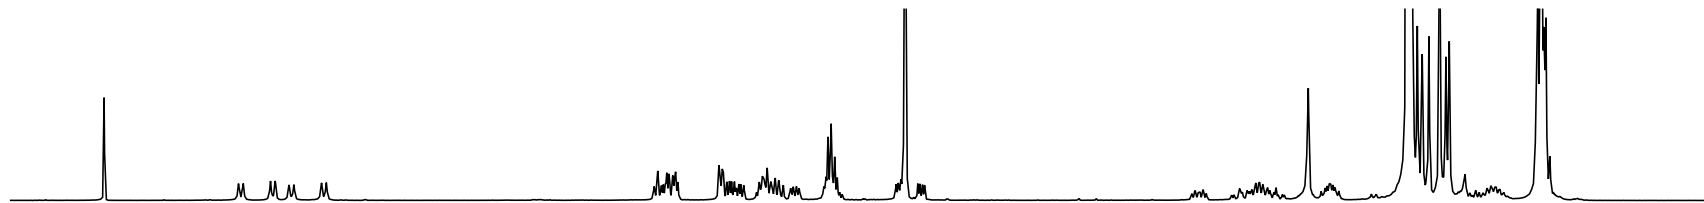

**21n** ( $^1\text{H} - ^1\text{H}$  COSY)

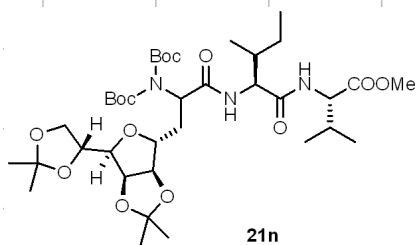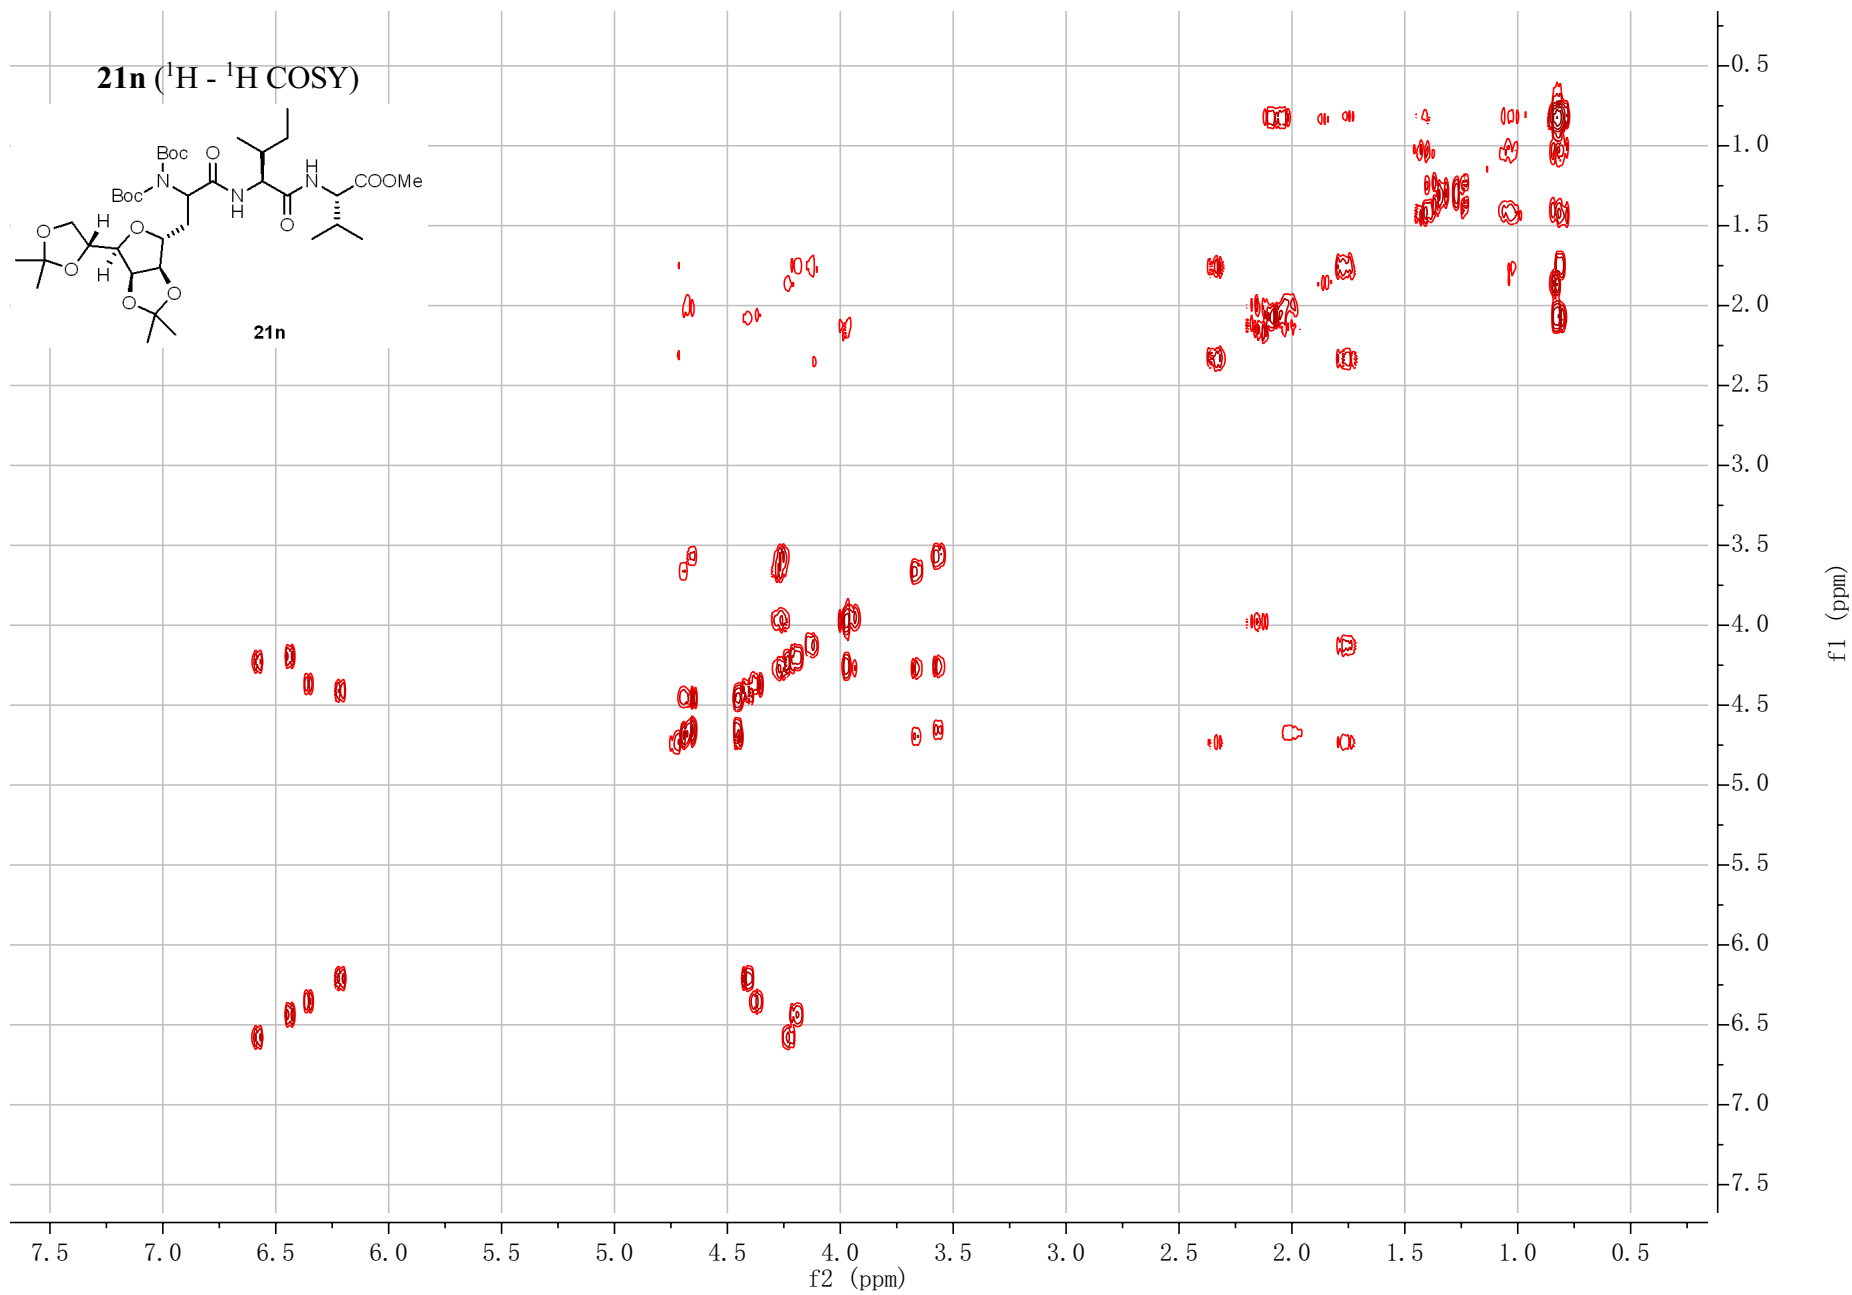







7.29  
7.28  
7.28  
7.27  
7.27  
7.27  
7.26  
7.26  
7.26  
7.23  
7.22  
7.21  
7.21  
7.19  
7.19  
7.17  
4.67  
4.66  
4.57  
4.53  
4.53  
4.00  
3.99  
3.92  
3.62  
3.61  
2.18  
1.95  
1.95  
1.94  
1.93  
1.93  
1.51  
1.49  
1.49  
1.48  
1.47  
1.47  
1.40  
1.38  
1.35  
1.34  
1.28  
1.26  
0.90  
0.90  
0.89  
0.88  
0.88  
0.87  
0.86  
0.86  
0.85  
0.84  
0.84  
0.84  
0.83  
0.82

**21o** ( $^1\text{H}$  NMR, 400MHz,  $\text{CDCl}_3$ )

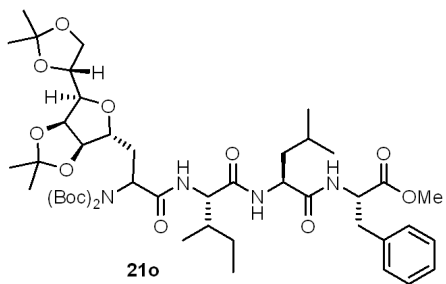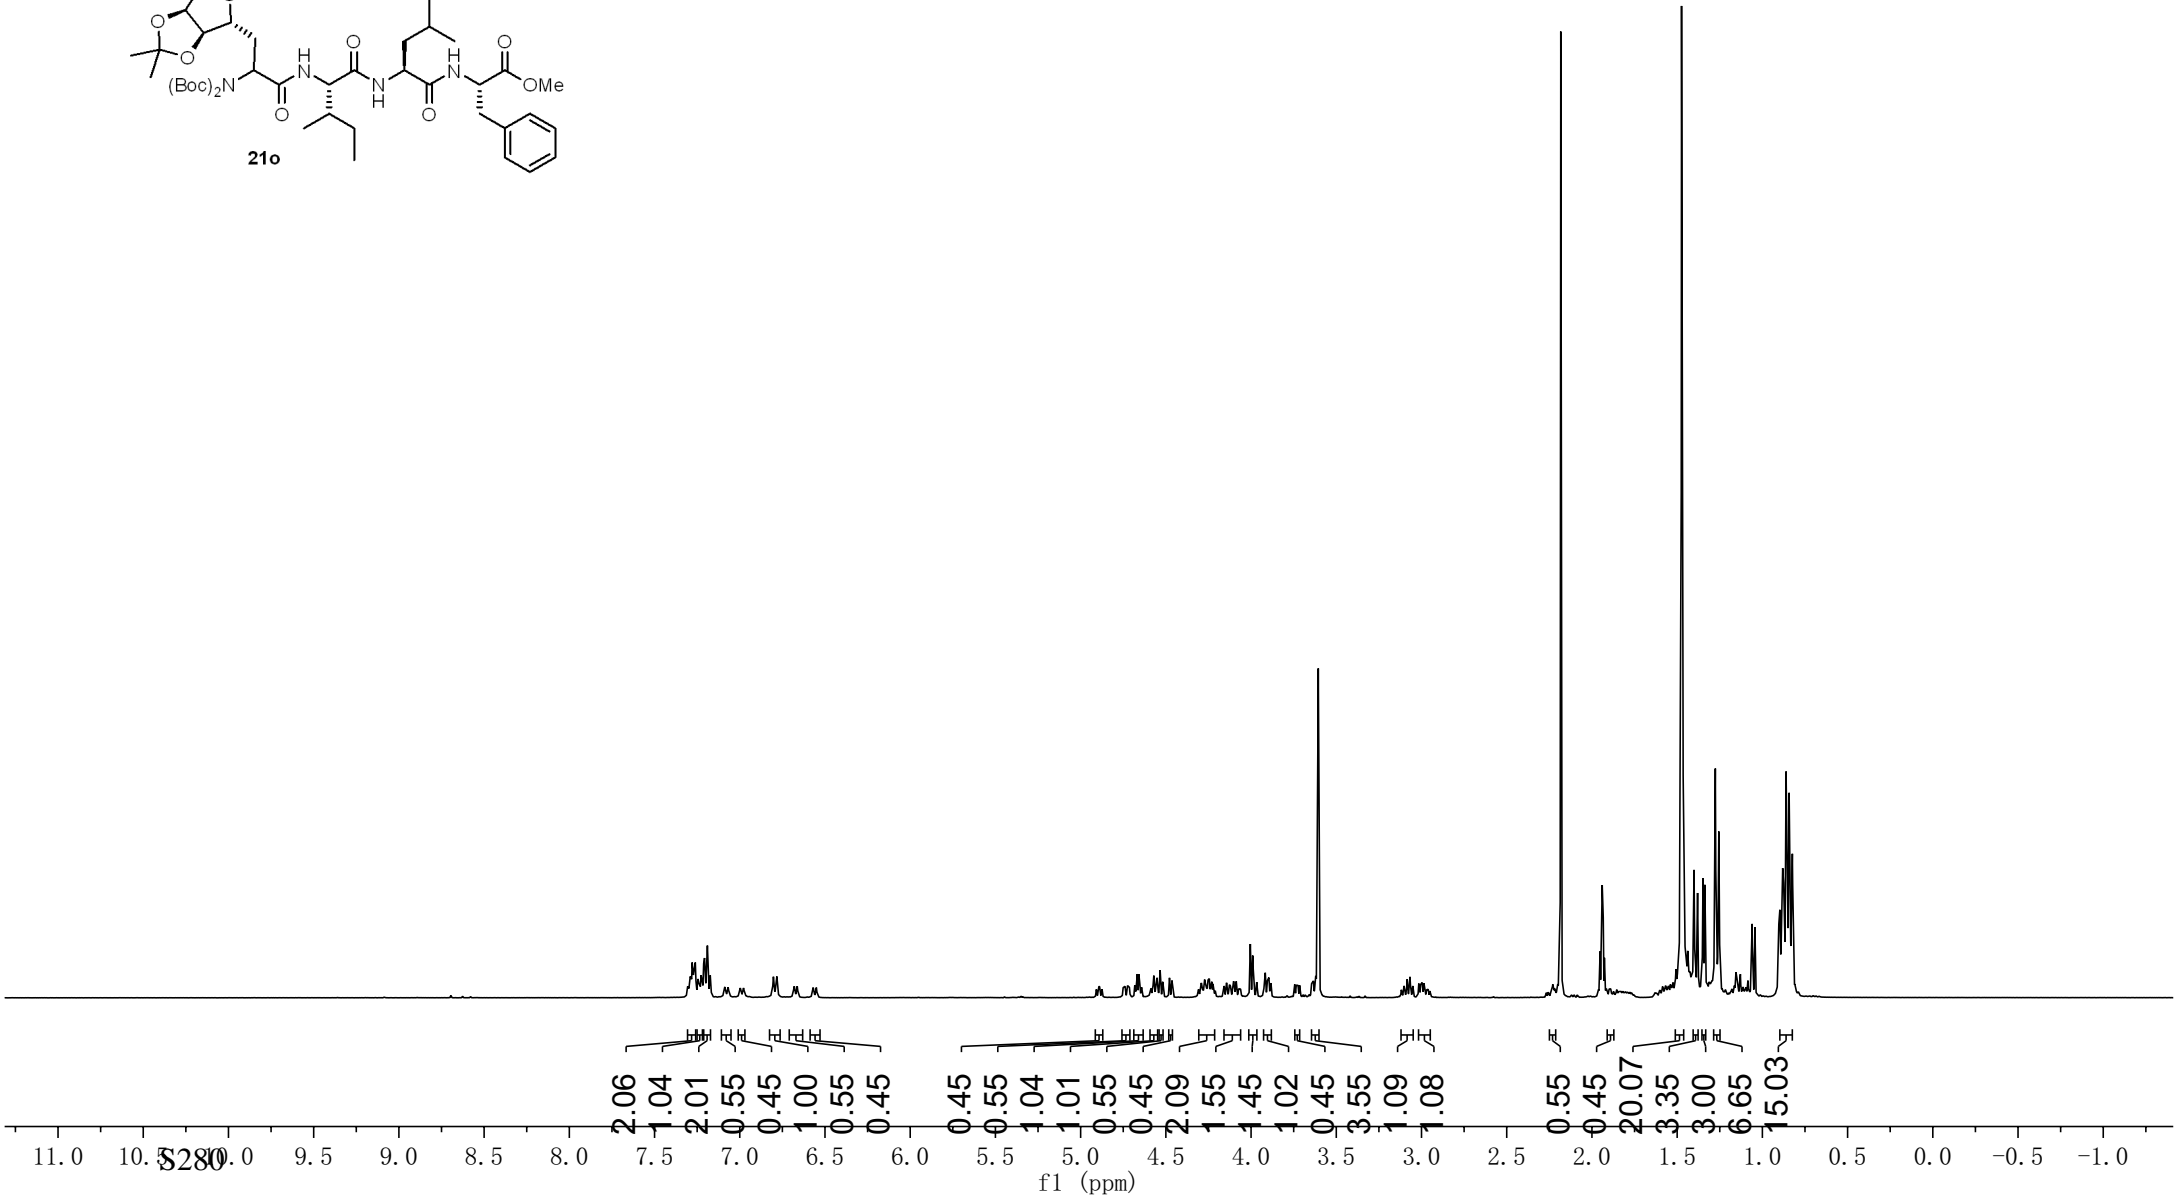

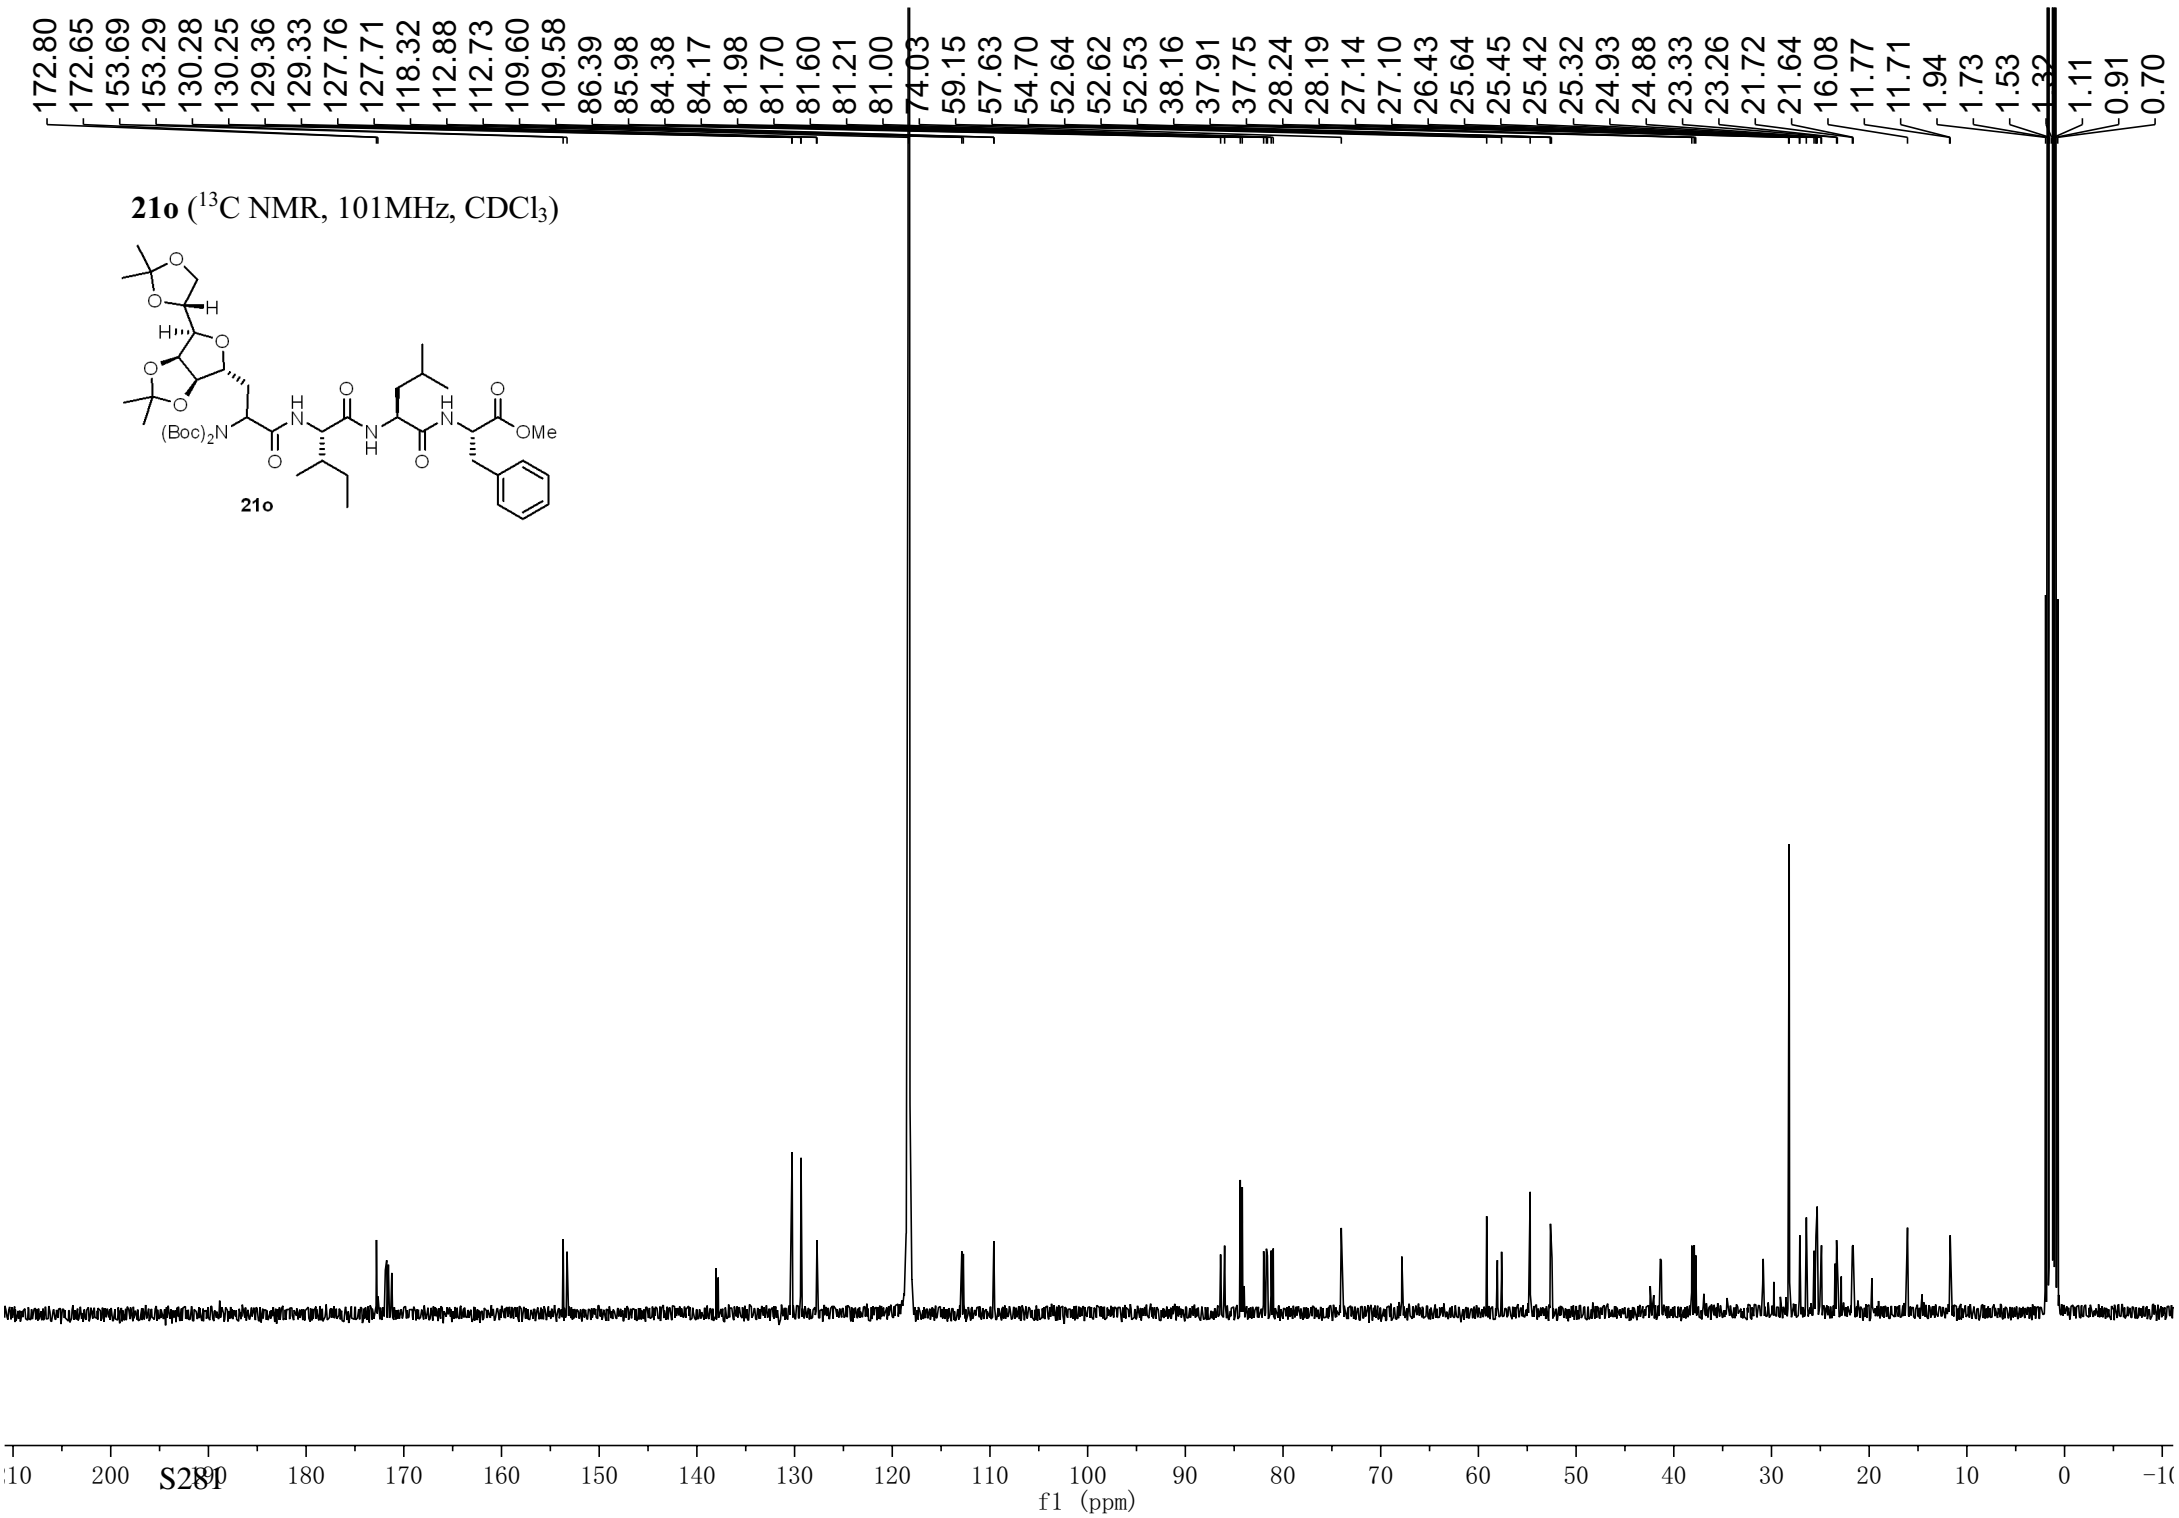

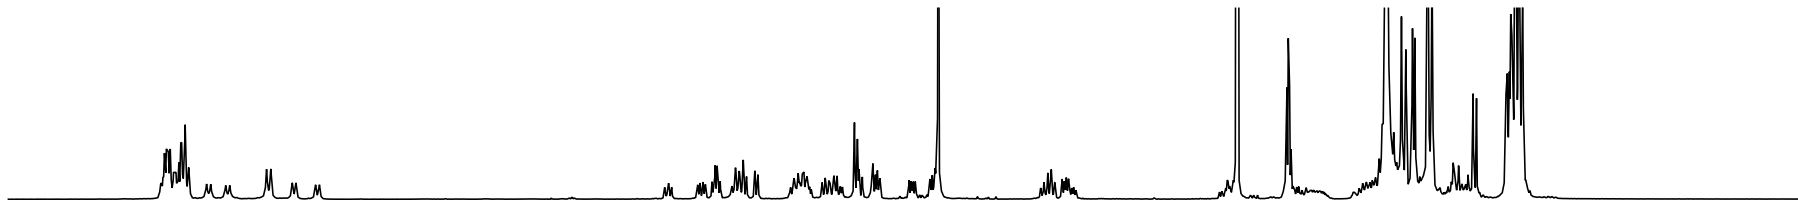

**21o** ( $^1\text{H} - ^1\text{H}$  COSY)

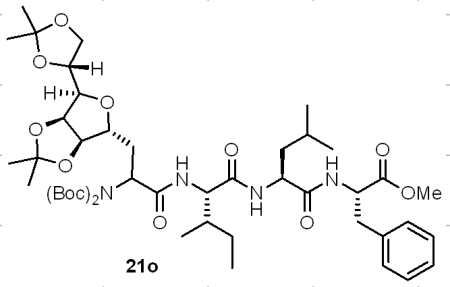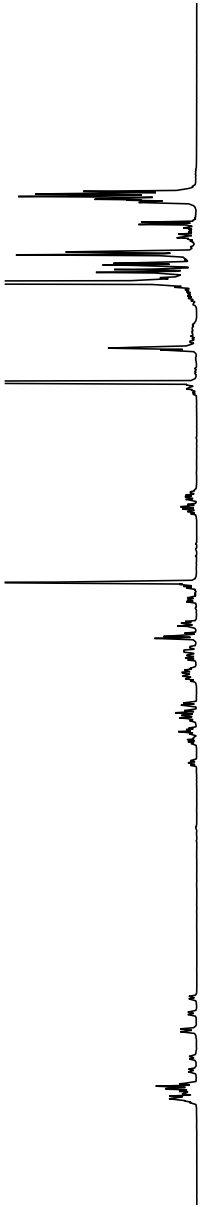

S282

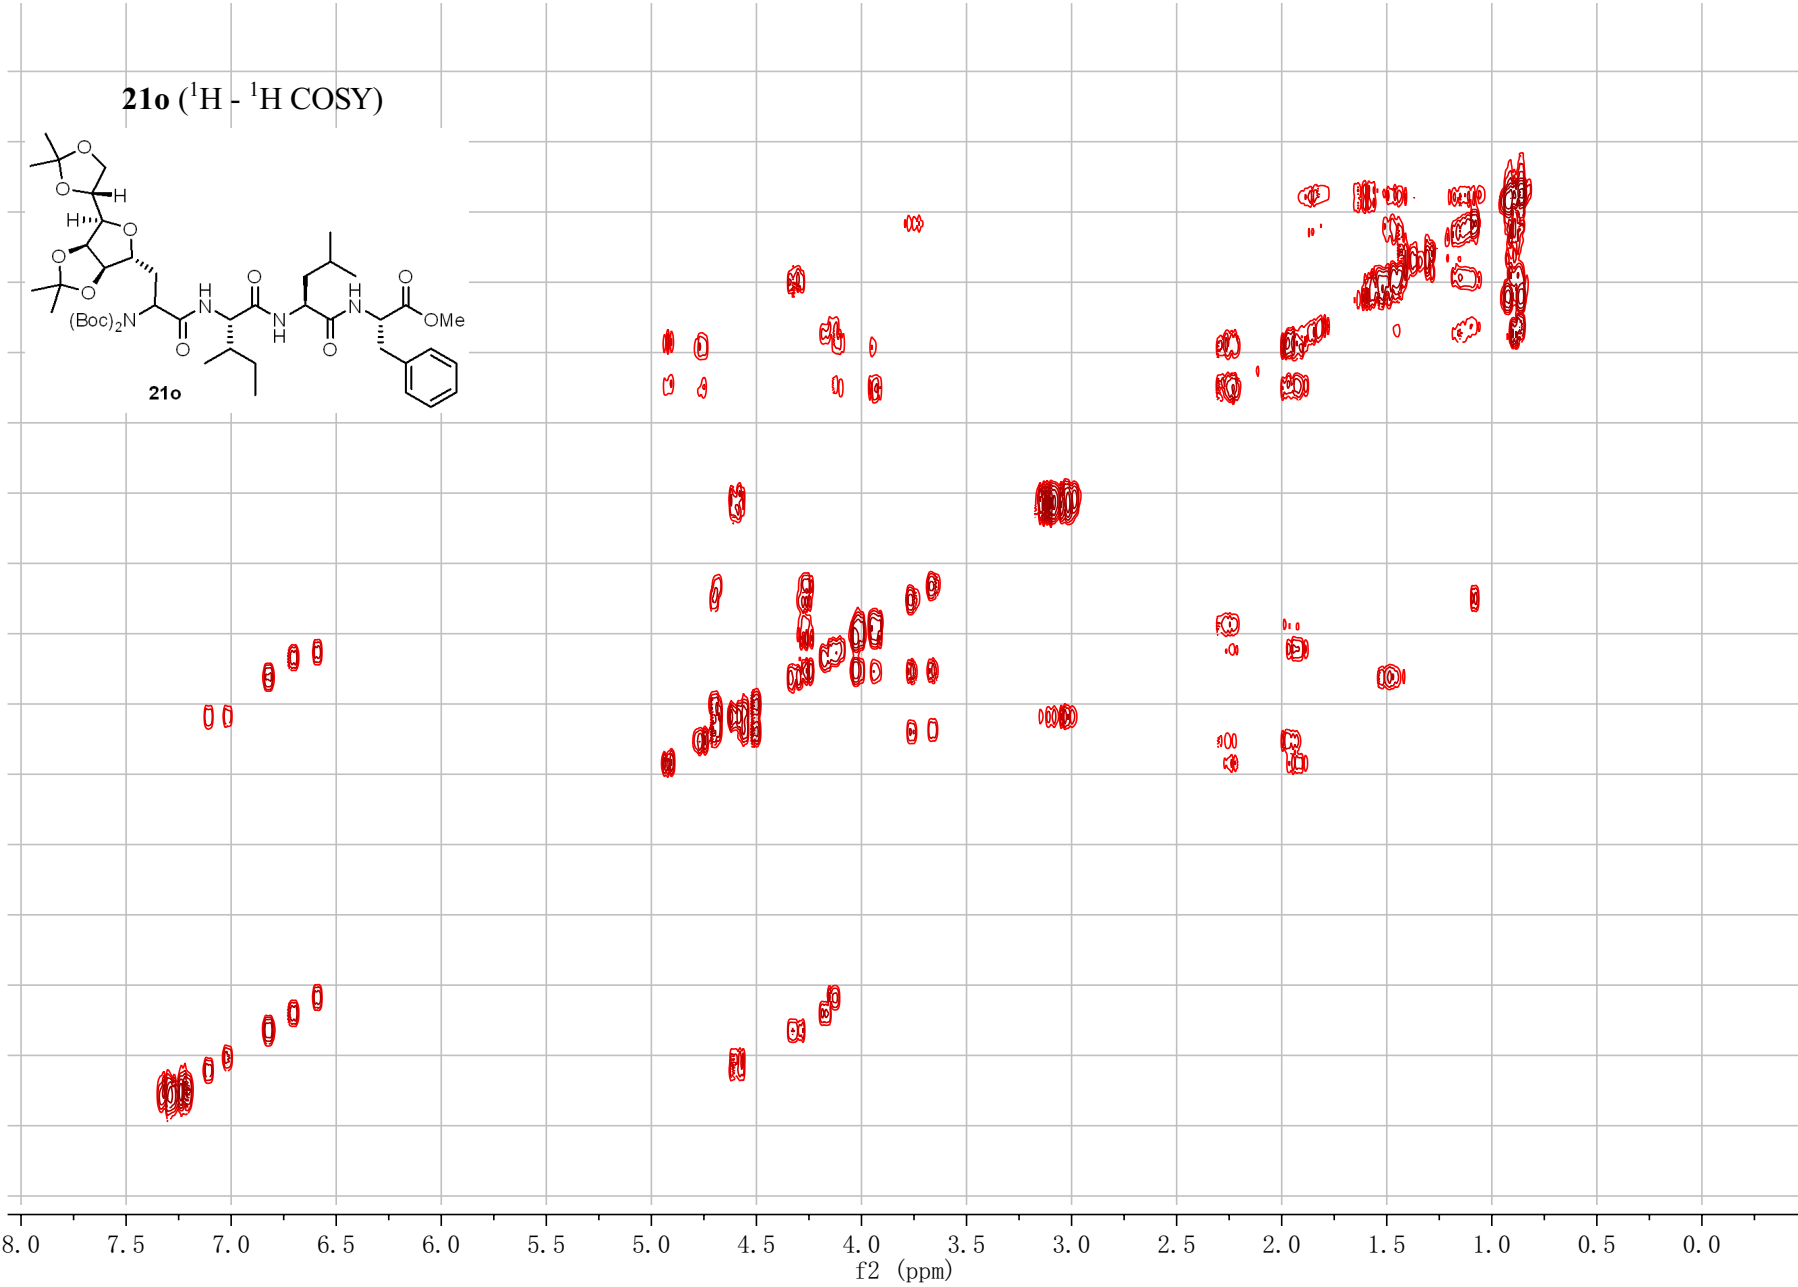

f1 (ppm)

f2 (ppm)

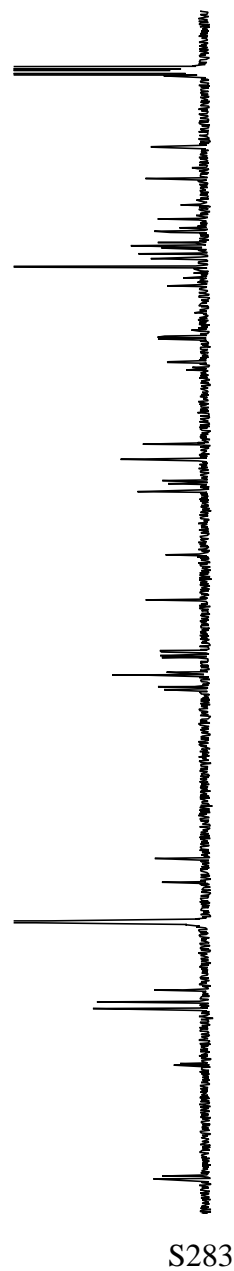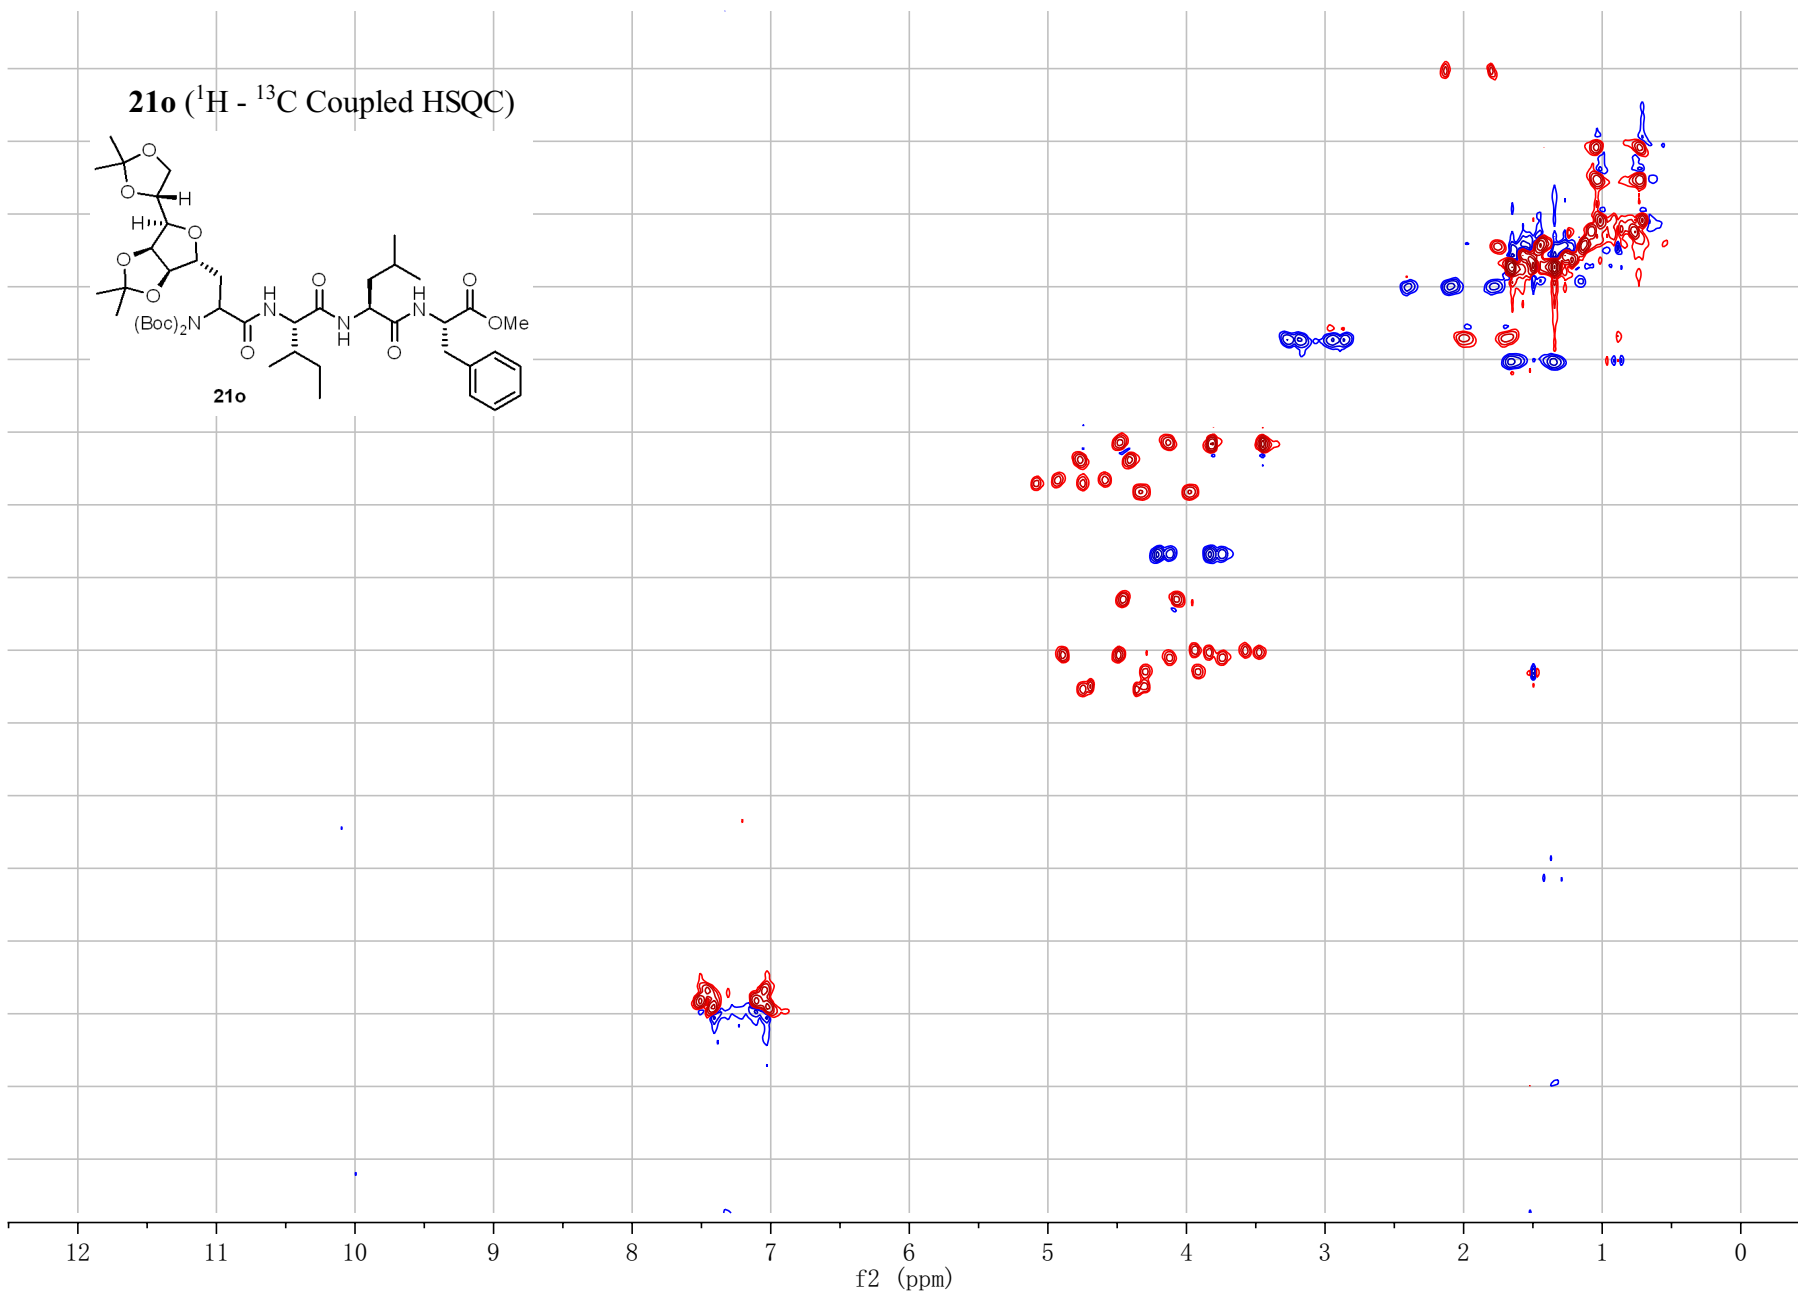

**21o** ( $^1\text{H} - ^{13}\text{C}$  Coupled HSQC)

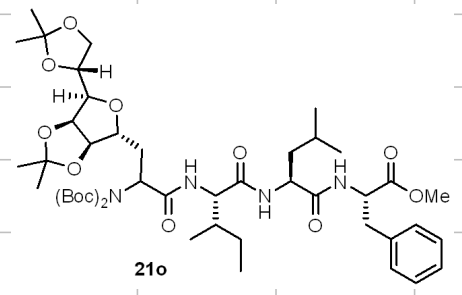

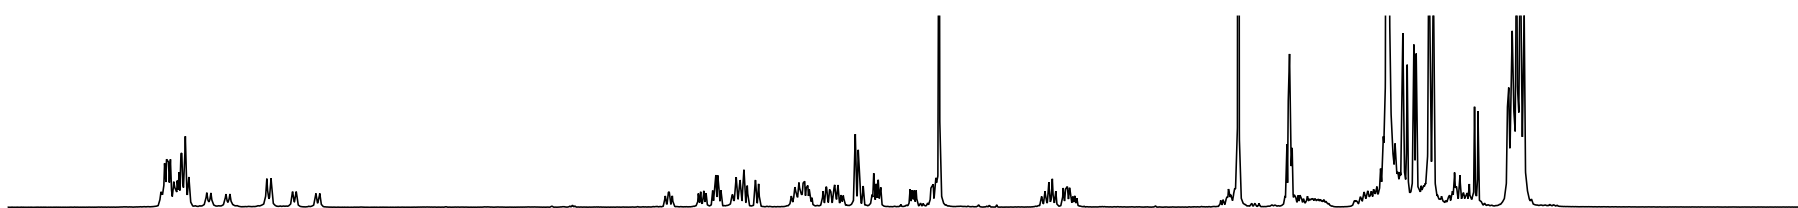

21o (<sup>1</sup>H - <sup>13</sup>C HSQC)

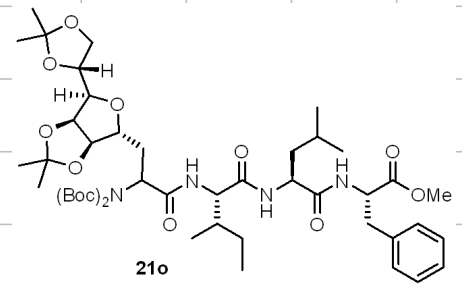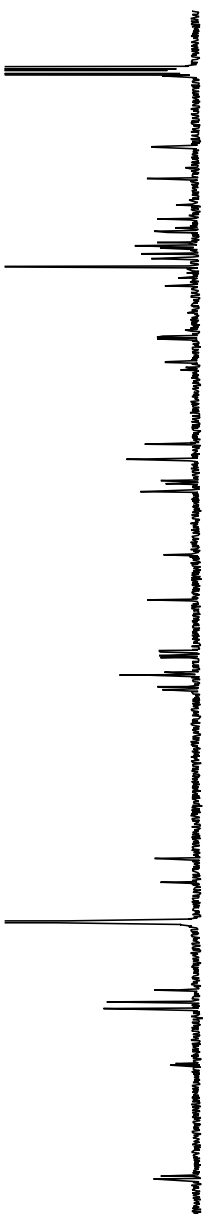

S284

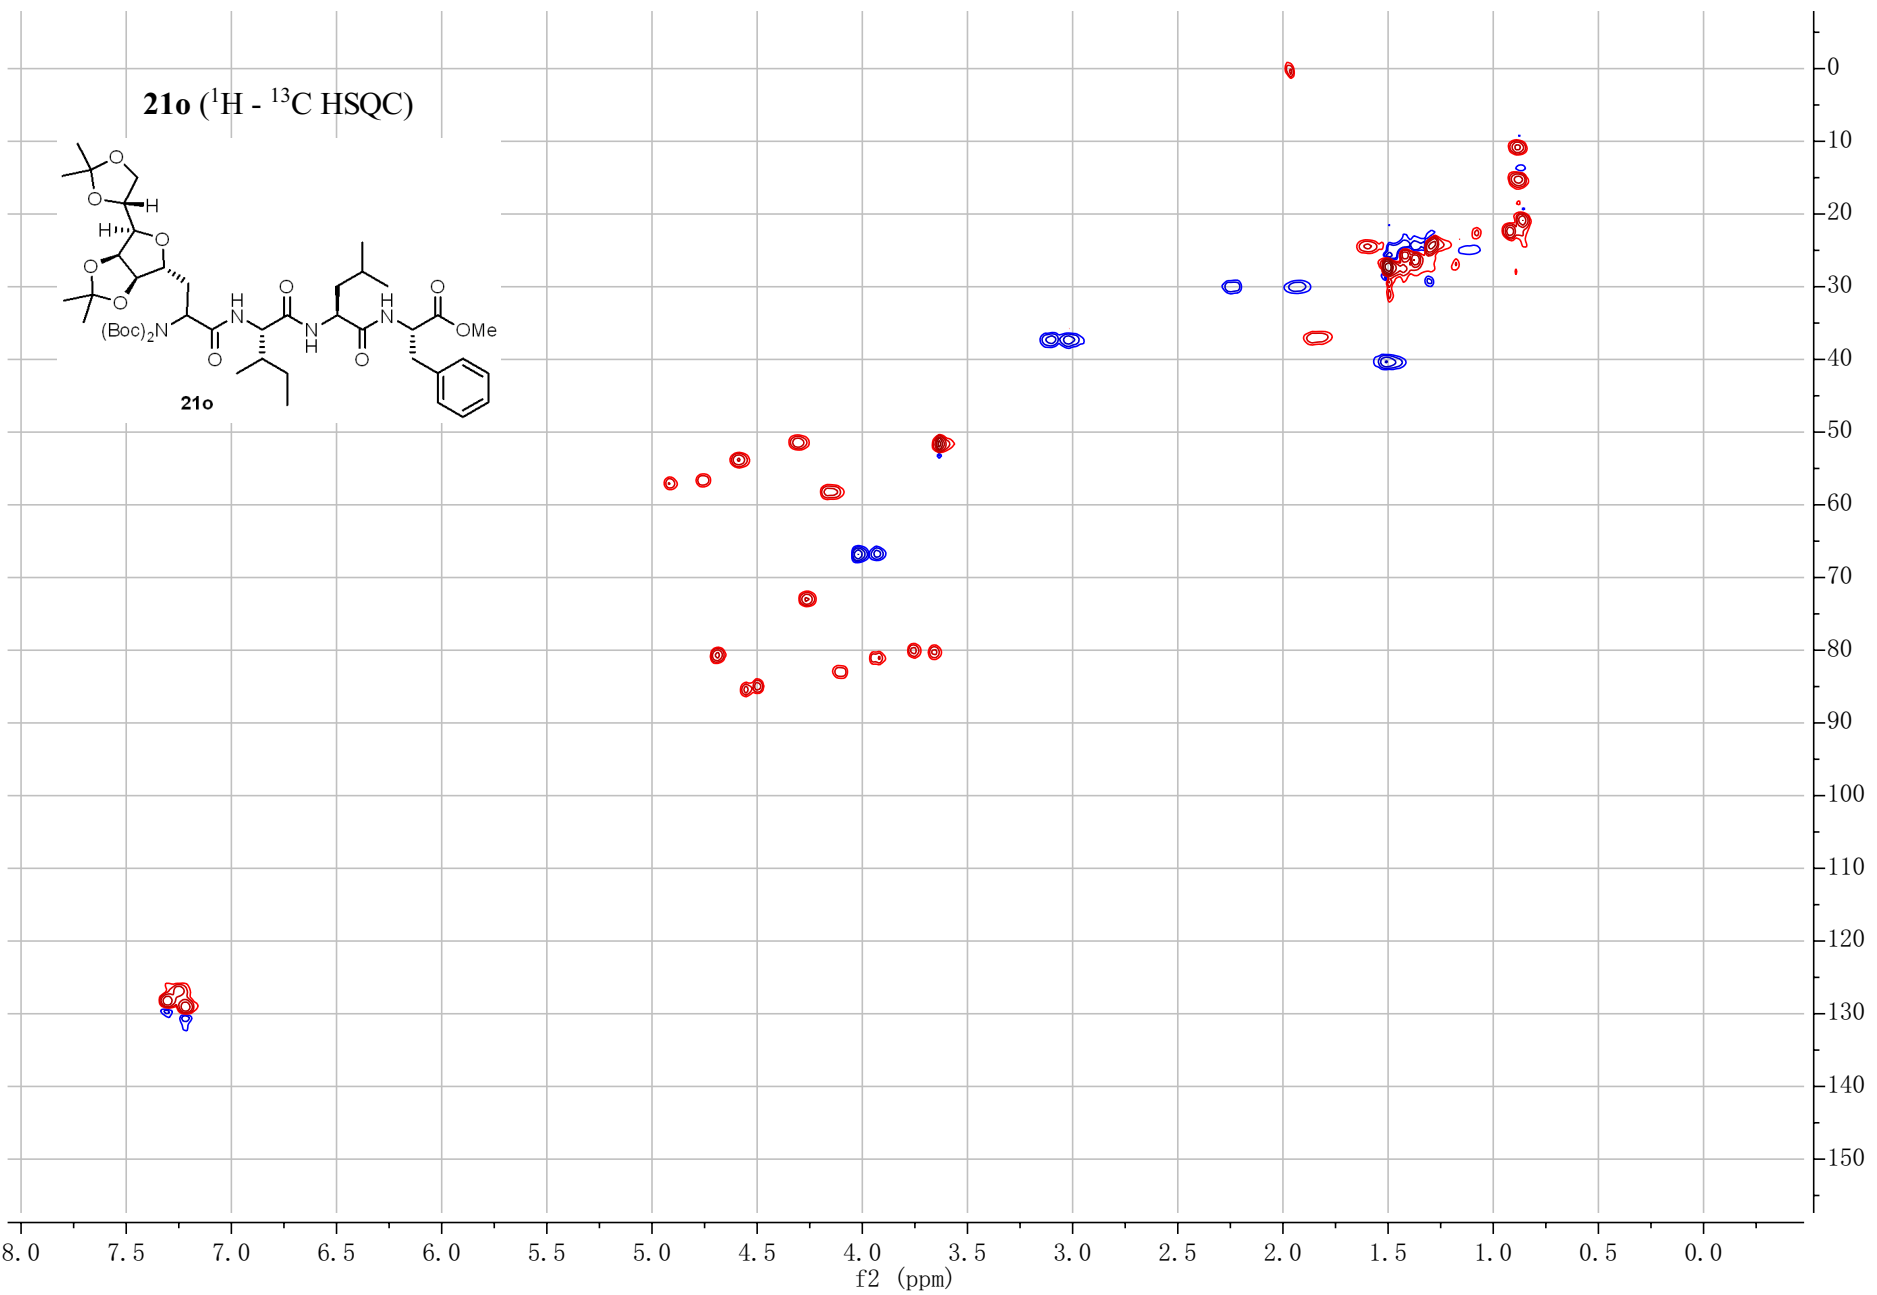

f1 (ppm)

f2 (ppm)

17c (<sup>1</sup>H NMR, 400MHz, CDCl<sub>3</sub>)

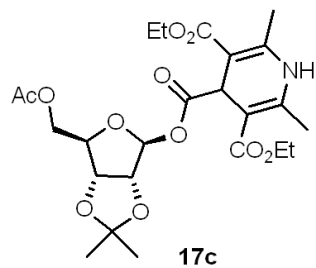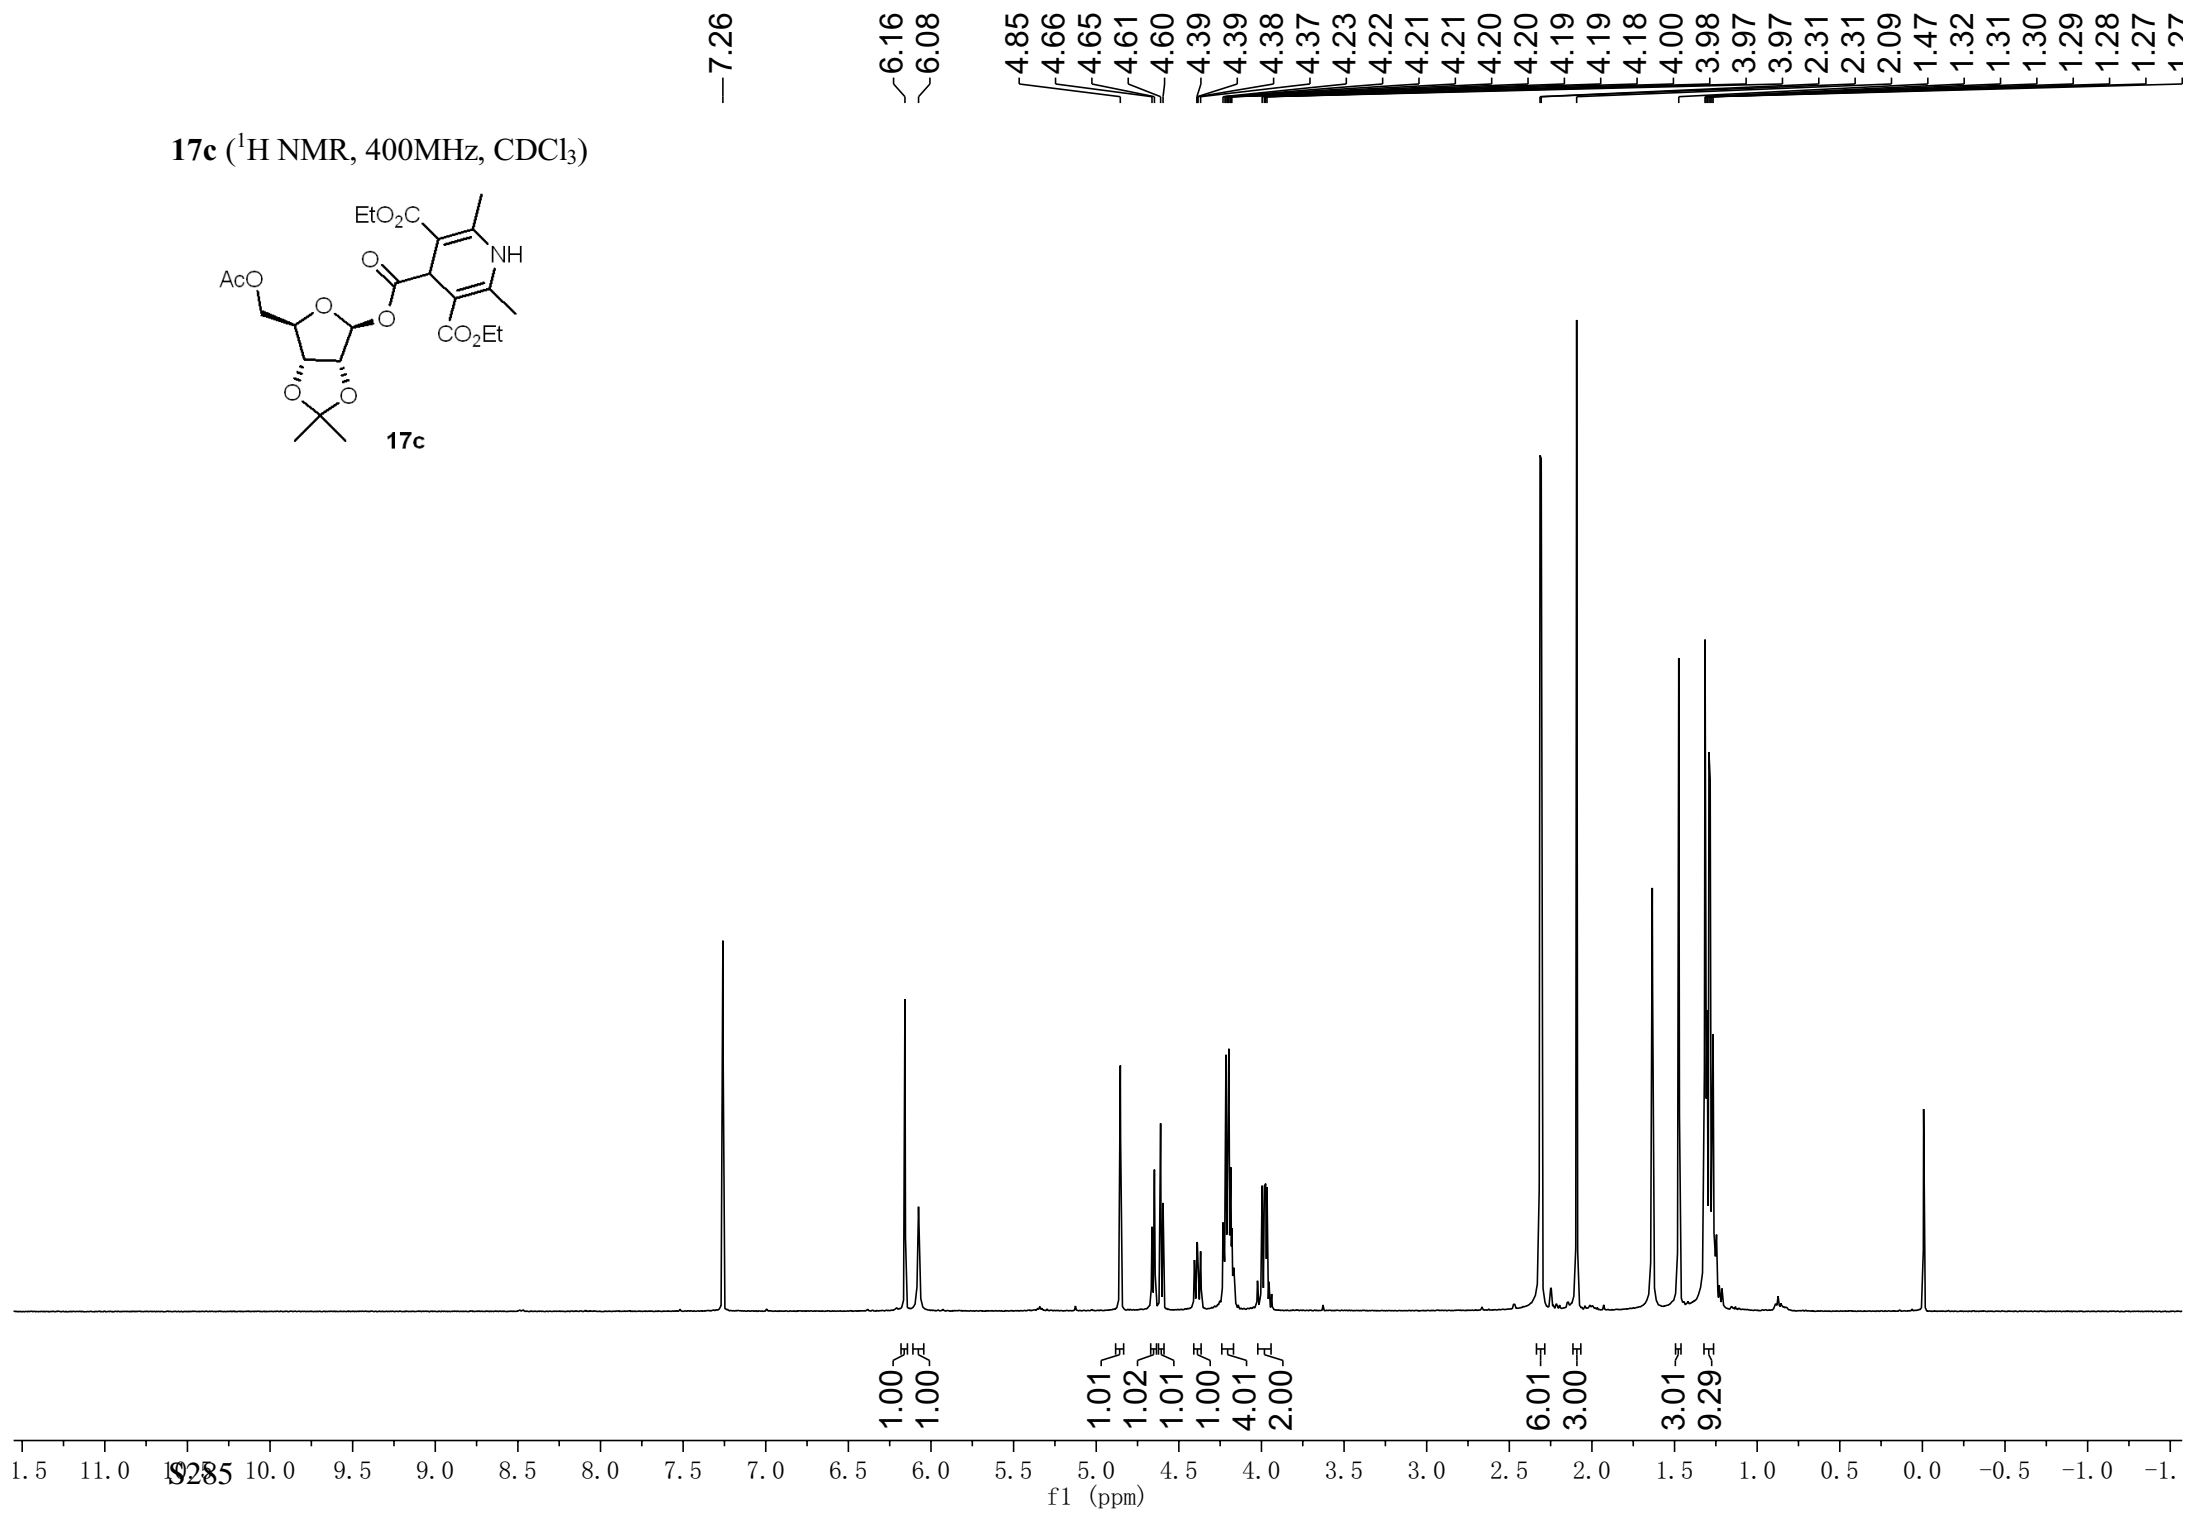



17c (<sup>13</sup>C NMR, 101MHz, CDCl<sub>3</sub>)

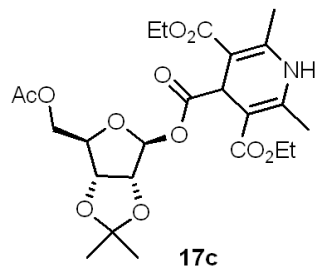

171.27  
170.83  
167.08  
167.06

146.12  
145.98

113.34

102.29  
98.42  
98.15

85.18  
85.15  
82.05

77.48  
77.16  
76.84

64.17  
60.30  
60.27

40.65

26.52  
25.19  
20.96  
19.51  
19.44  
14.55

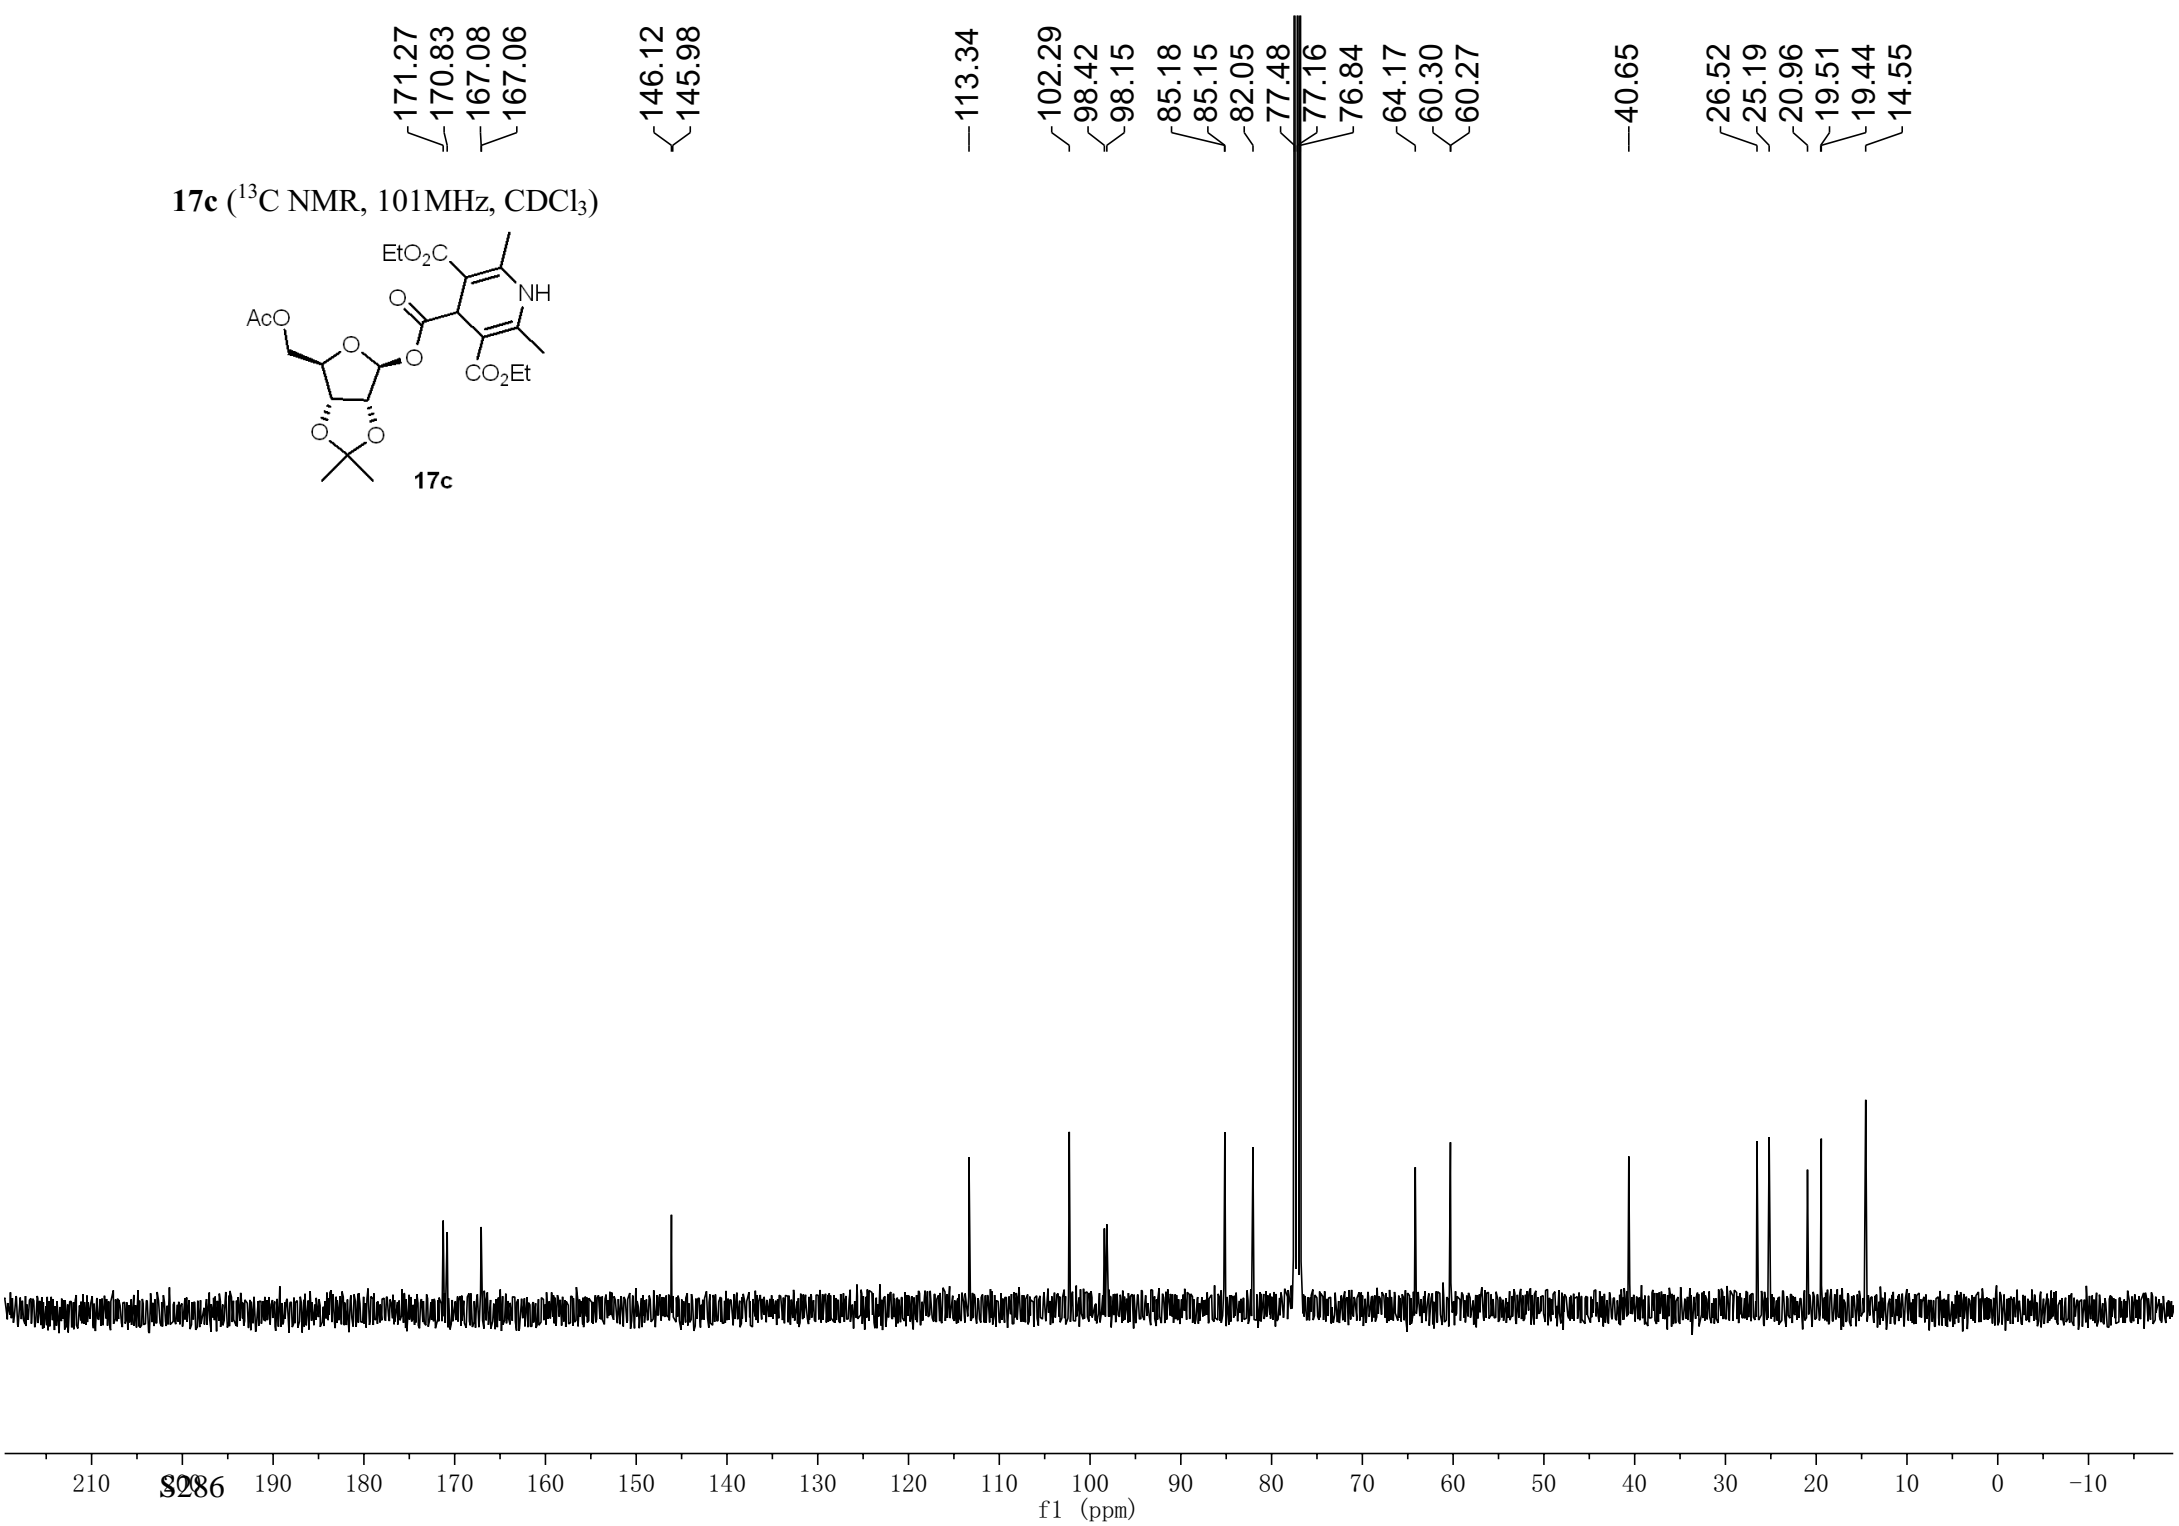

17e (<sup>1</sup>H NMR, 400MHz, CDCl<sub>3</sub>)

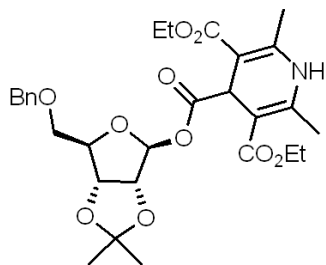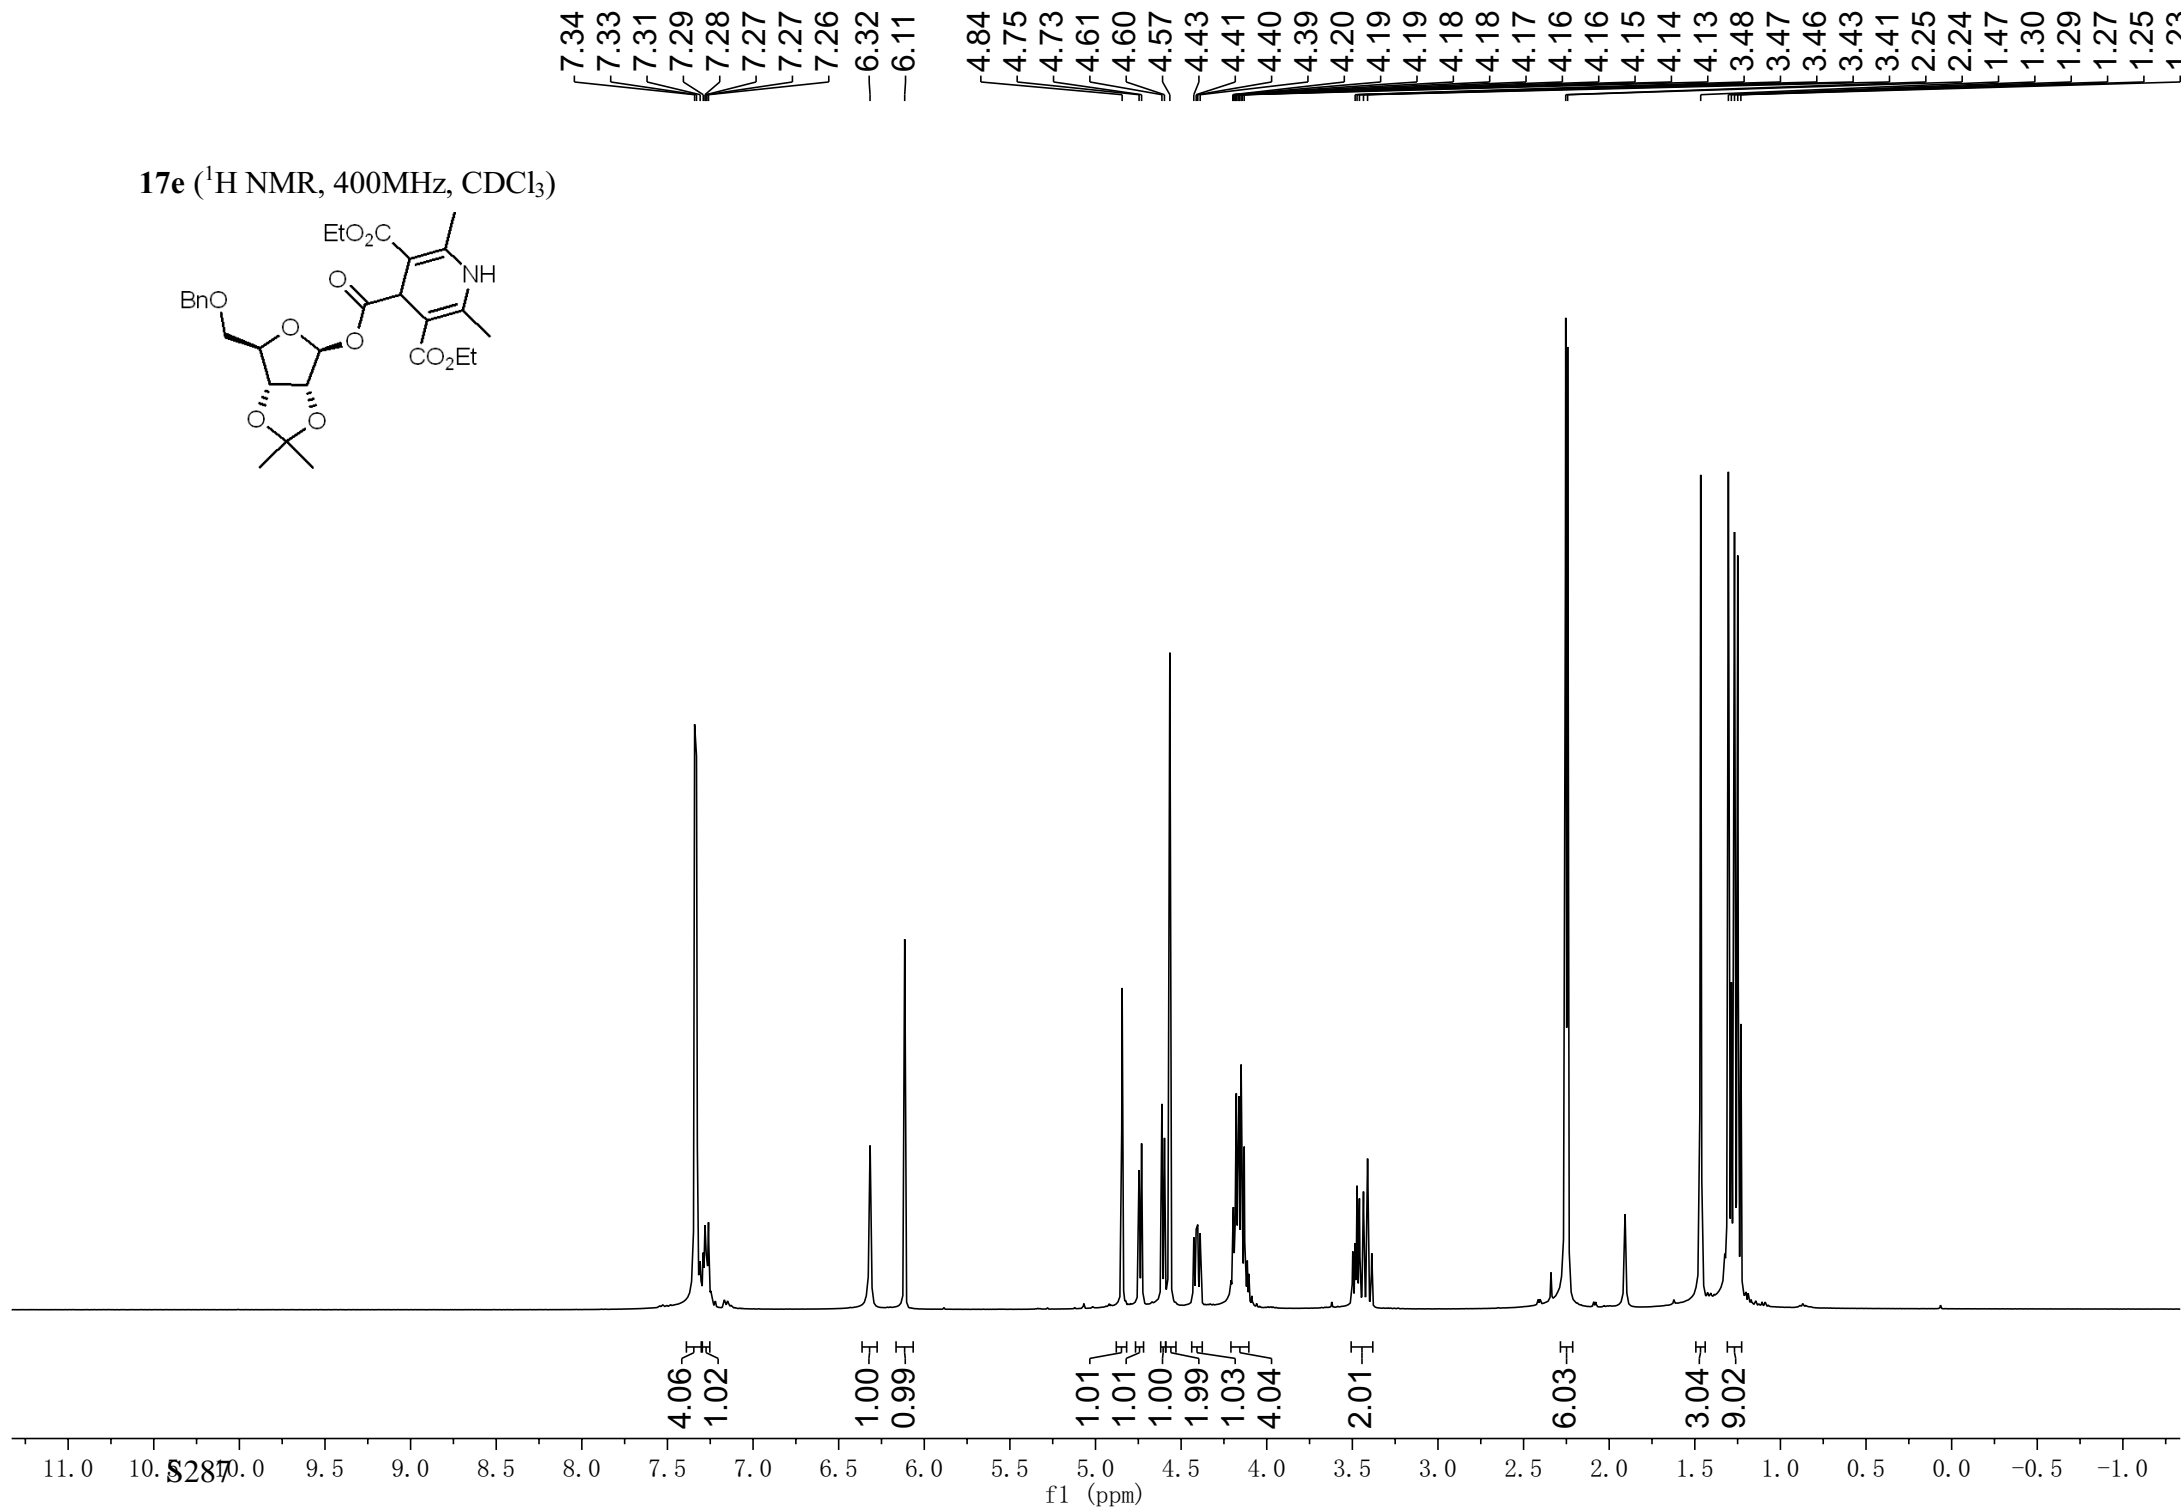

17e (<sup>13</sup>C NMR, 101MHz, CDCl<sub>3</sub>)

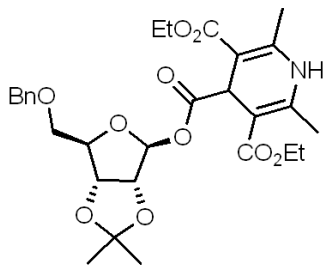

172.32  
167.14  
167.02

146.33  
146.12  
138.12

128.47  
127.77  
127.63

113.00

102.59  
98.09  
97.65

86.15  
85.12  
82.23

77.48  
77.16  
76.84

73.16  
70.26  
60.18  
60.11

40.39

26.50  
25.10  
19.21

19.19  
14.54  
14.52

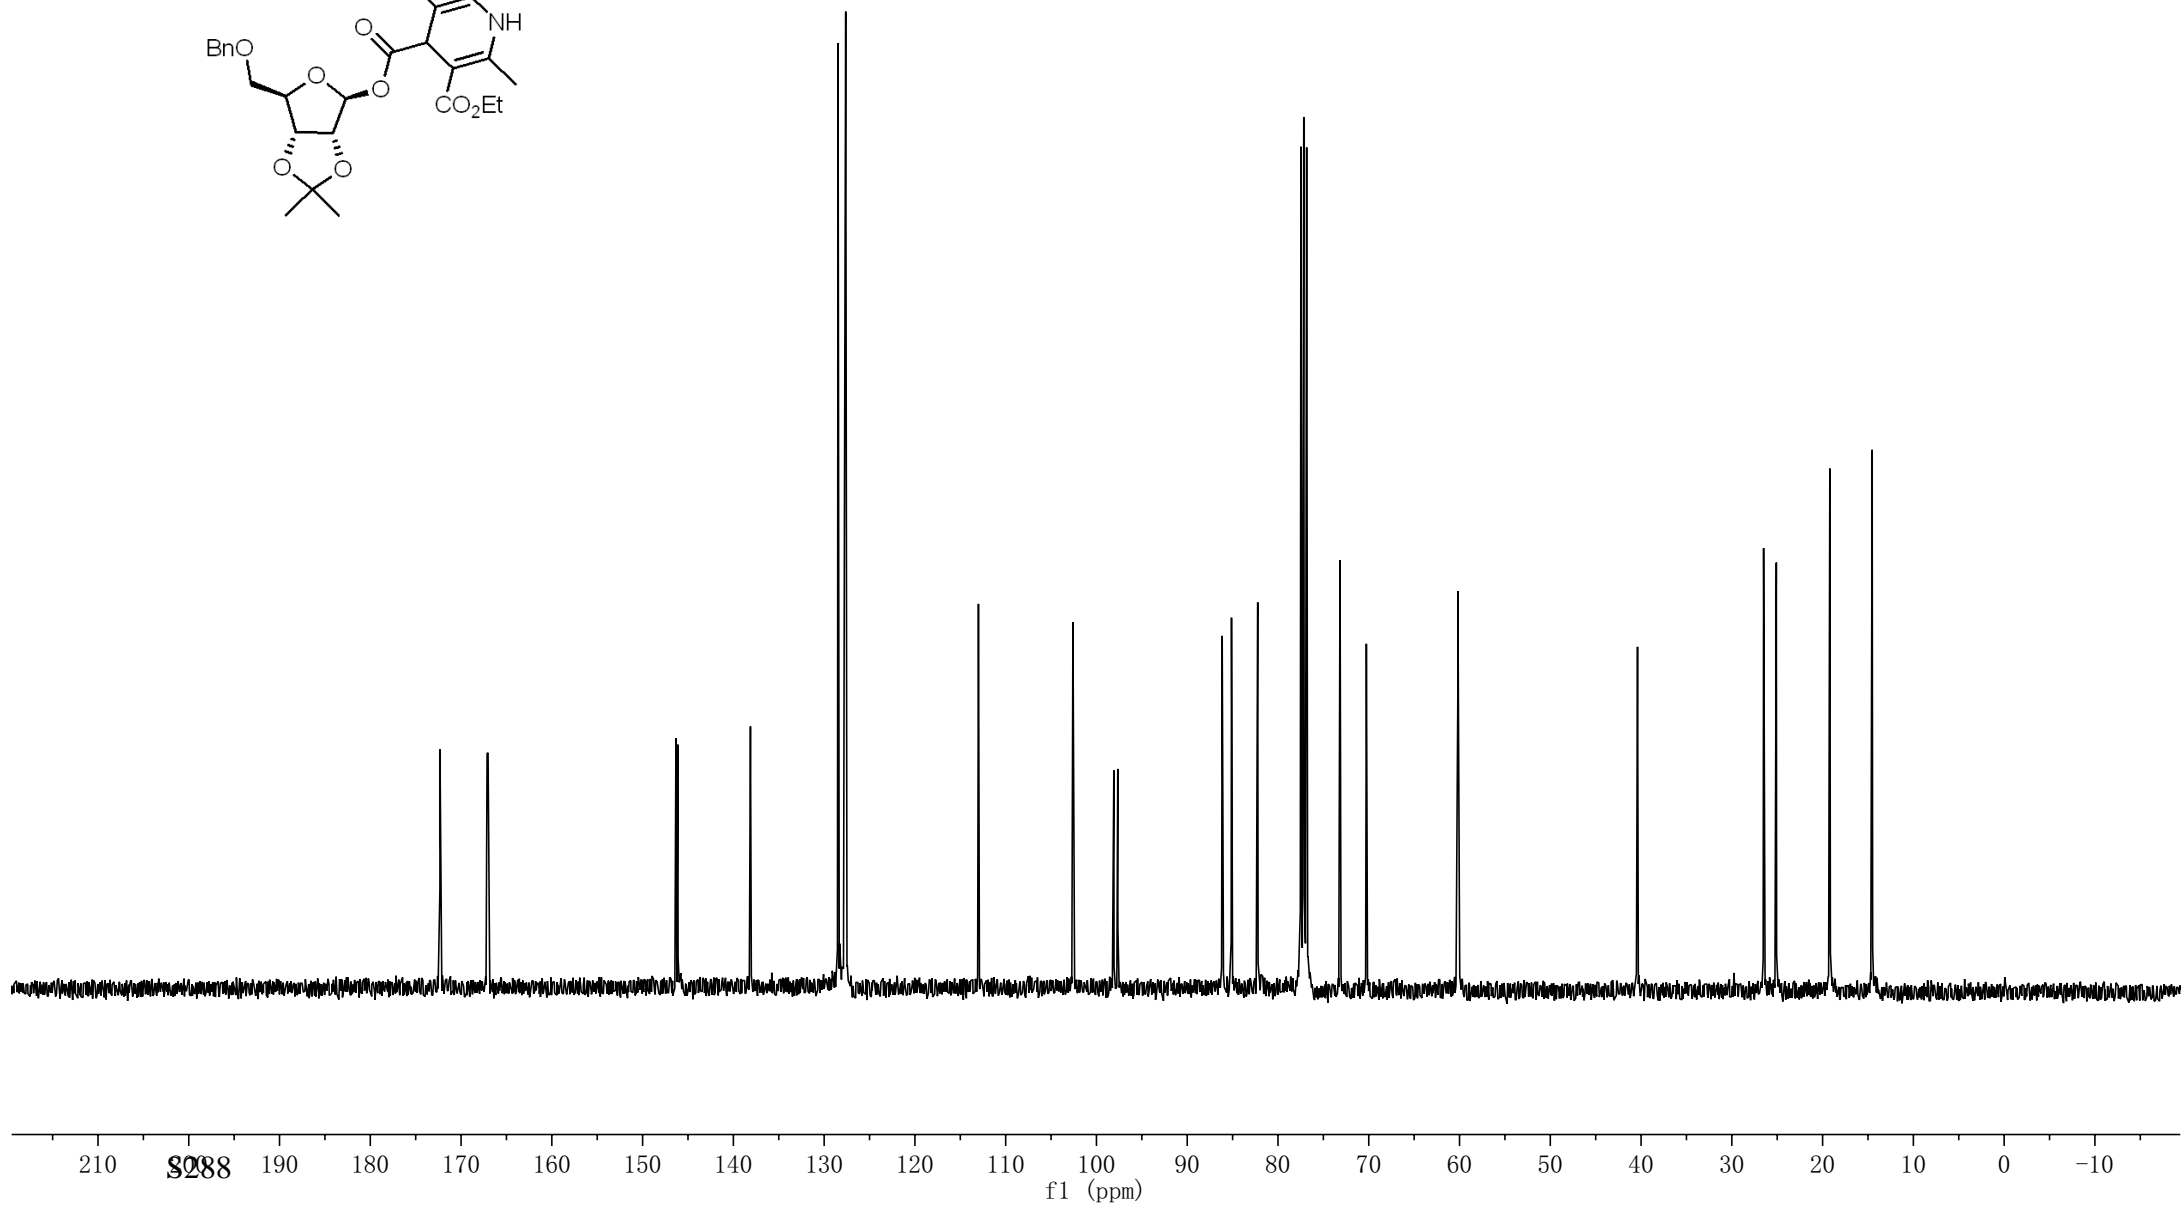

7.49  
7.48  
7.47  
7.46  
7.34  
7.33  
7.31  
7.31  
7.31  
7.30  
7.29  
7.28  
7.28  
7.27  
7.27  
7.26  
7.25  
7.24  
5.95  
5.52  
5.01  
4.93  
4.92  
4.91  
4.89  
4.67  
4.64  
4.62  
4.60  
4.46  
4.45  
4.20  
4.20  
4.19  
4.19  
4.18  
4.17  
4.17  
4.15  
4.15  
3.91  
3.91  
3.57  
3.55  
3.53  
3.52  
3.43  
3.42  
3.41  
2.28  
2.27  
1.34  
1.32  
1.31  
1.29  
1.27  
1.25  
1.24

**17p** (<sup>1</sup>H NMR, 400MHz, CDCl<sub>3</sub>)

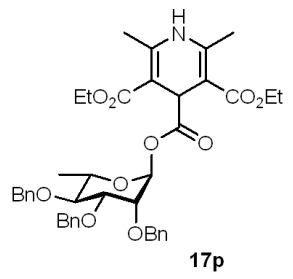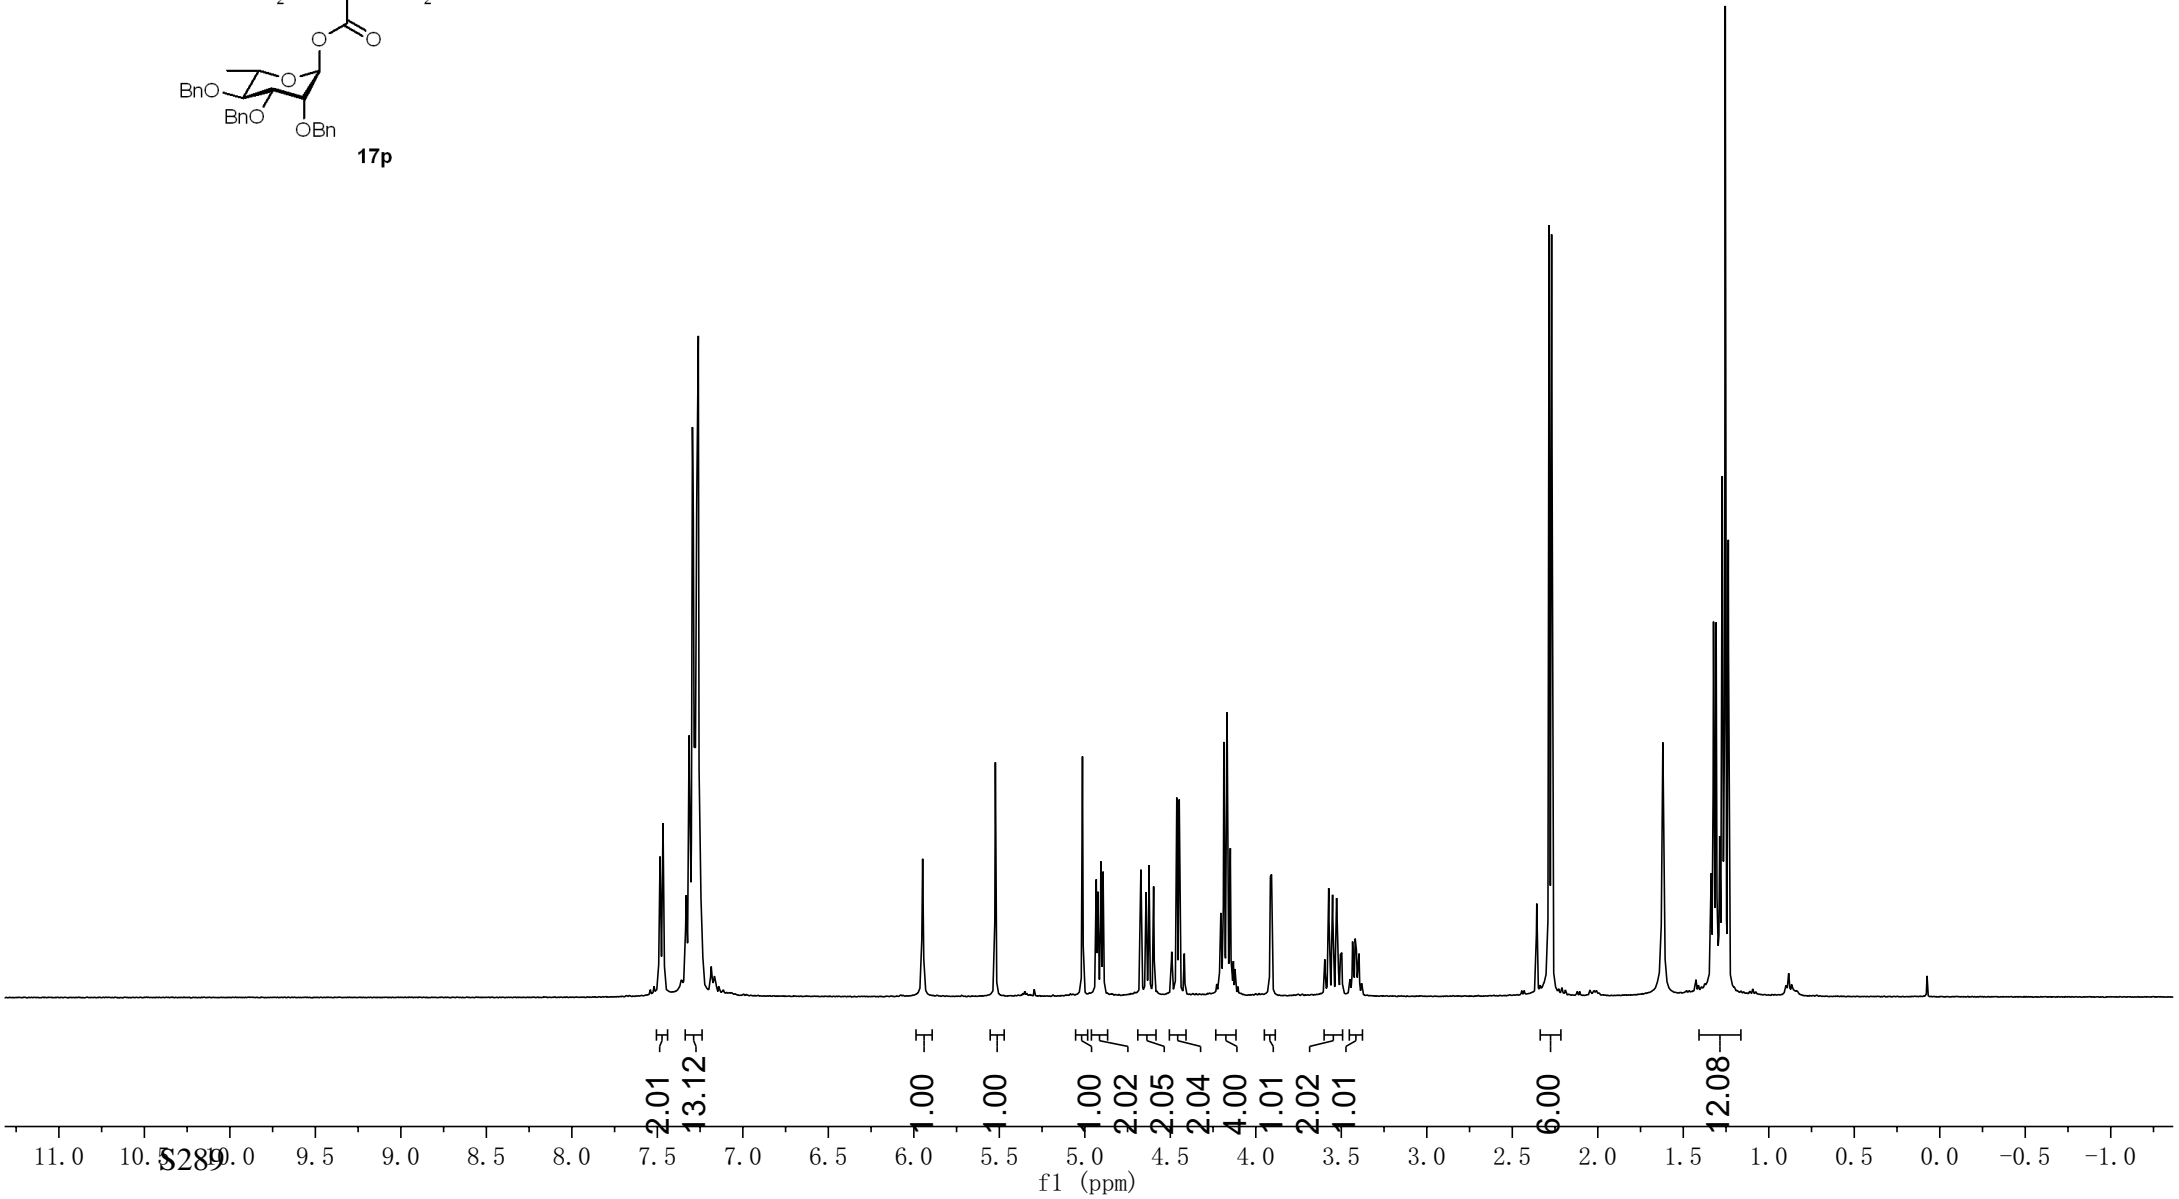

**17p** (<sup>13</sup>C NMR, 101MHz, CDCl<sub>3</sub>)

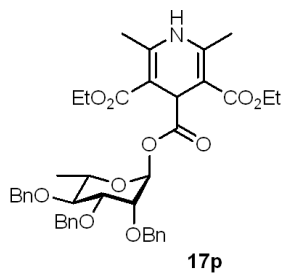

— 172.26  
— 167.09

146.08  
138.96  
138.50  
138.23  
128.49  
128.46  
128.33  
128.23  
128.05  
127.84  
127.72  
127.70  
127.57  
98.47  
98.33  
94.29  
81.83  
79.71  
77.48  
77.16  
76.84  
75.52  
74.58  
74.15  
72.91  
71.53  
60.37  
60.30  
40.84

19.54  
19.52  
18.00  
14.52  
14.48

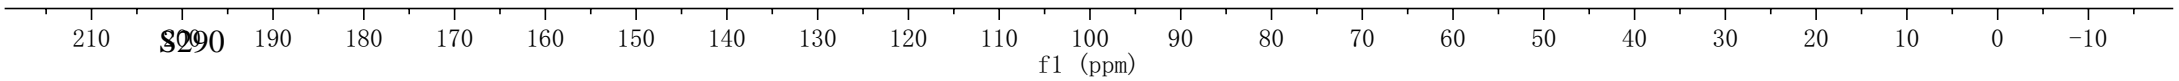

7.26  
6.17  
6.06  
5.92  
5.91  
5.71  
5.71  
5.39  
5.39  
5.38  
5.38  
5.18  
5.17  
5.16  
5.07  
5.04  
5.02  
5.01  
5.00  
4.94  
4.26  
4.25  
4.24  
4.24  
4.24  
4.23  
4.22  
4.21  
4.19  
4.18  
4.17  
4.16  
4.15  
2.36  
2.33  
2.31  
2.28  
2.20  
2.14  
2.06  
2.04  
1.98  
1.97  
1.33  
1.32  
1.31  
1.30  
1.30  
1.29  
1.28  
1.28  
1.27  
1.26  
1.26  
1.25  
1.24  
1.23  
1.19  
1.18

17q (<sup>1</sup>H NMR, 400MHz, CDCl<sub>3</sub>)

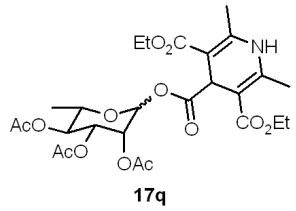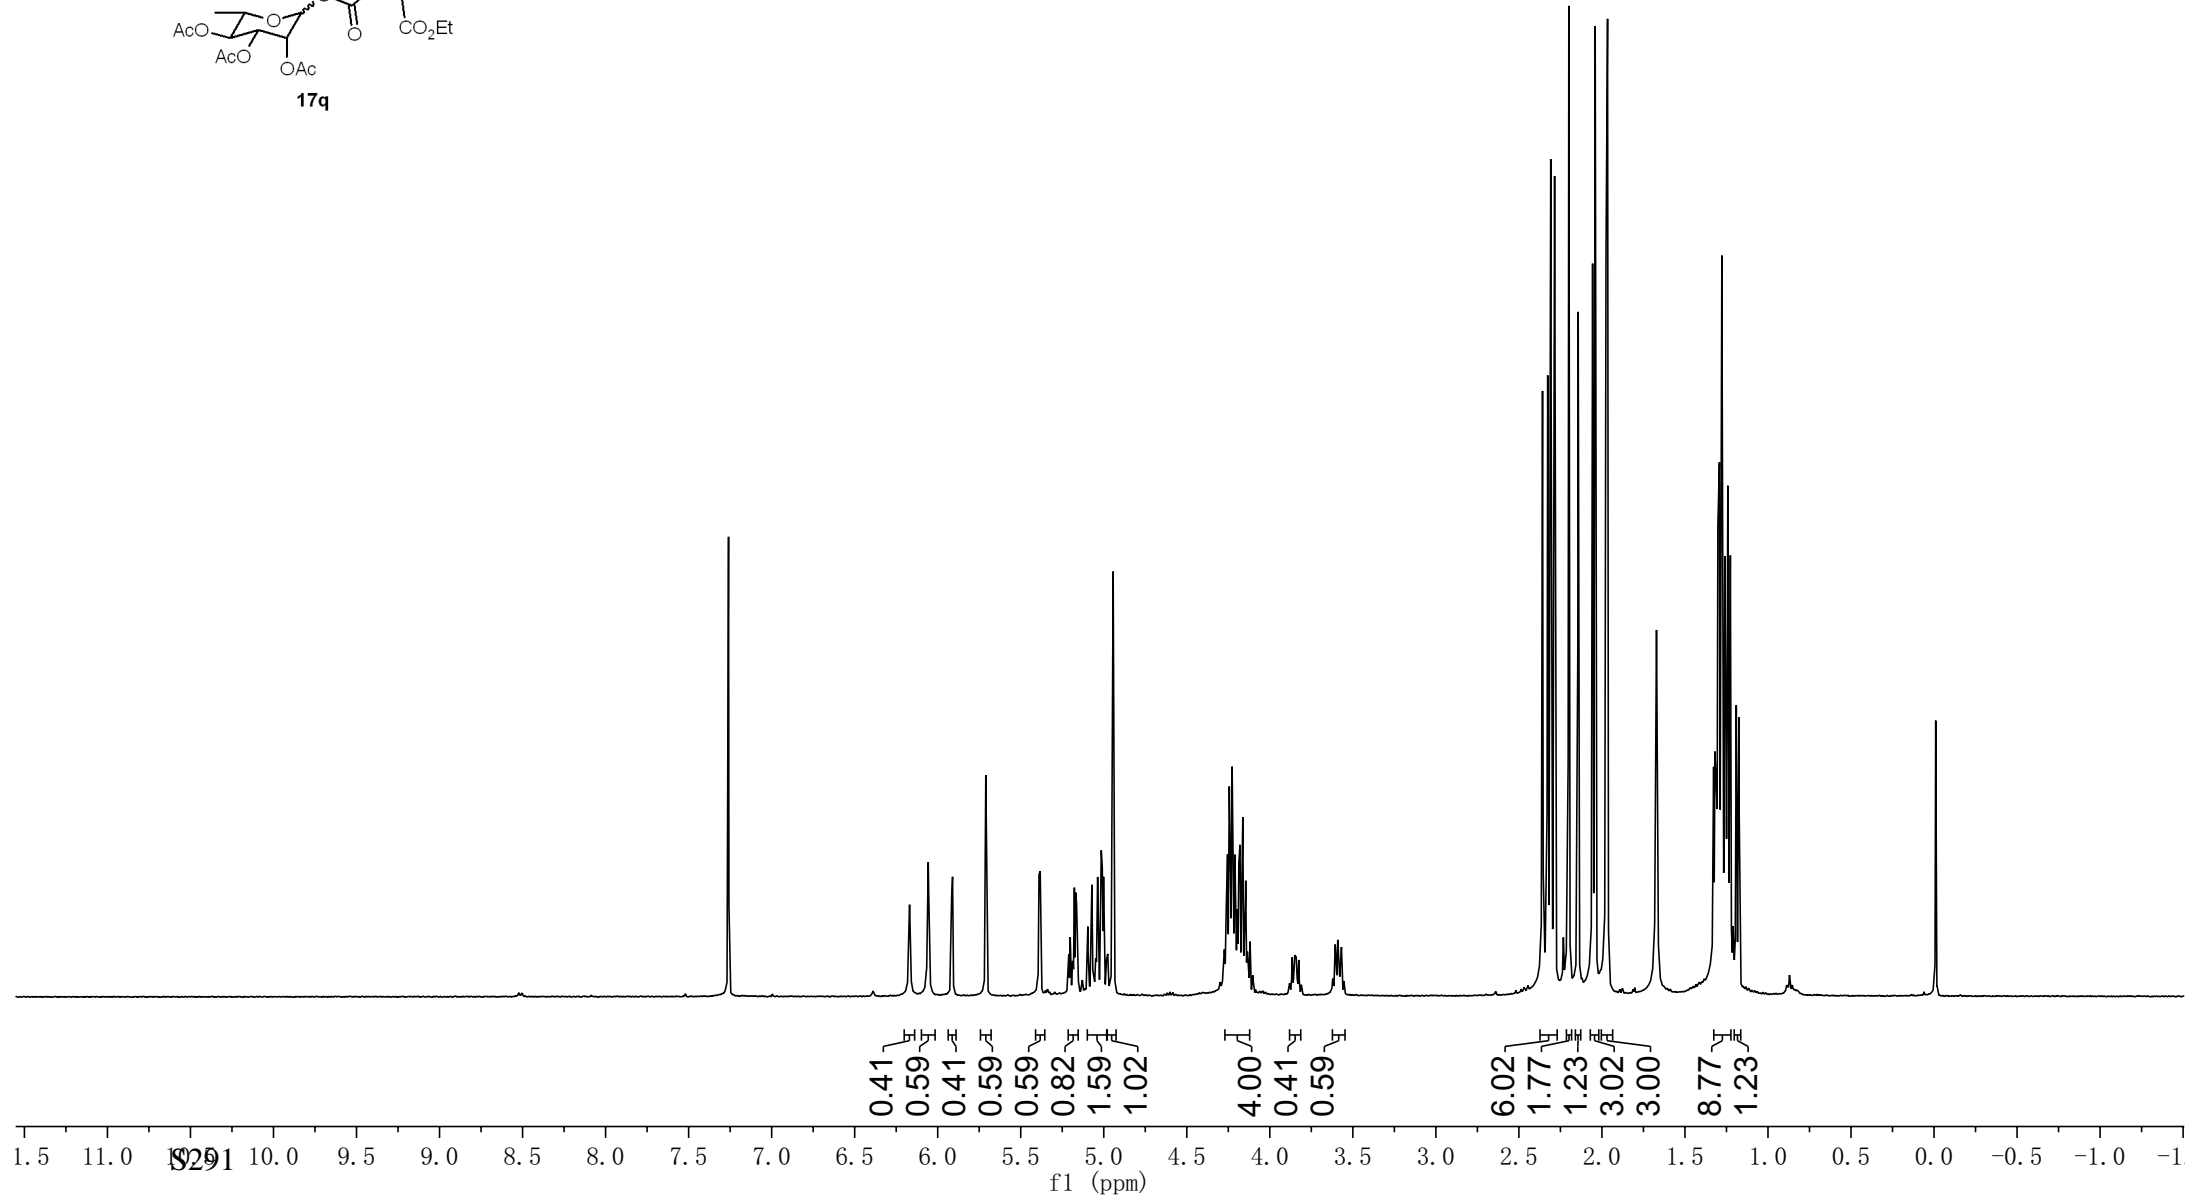

17q (<sup>13</sup>C NMR, 101MHz, CDCl<sub>3</sub>)

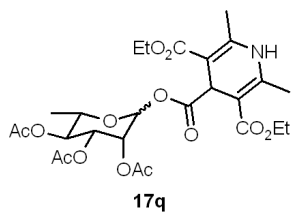

171.60  
170.59  
170.39  
170.11  
170.03  
167.01  
166.95

146.04  
145.98

98.15  
97.93  
90.81  
77.48  
77.16  
76.84  
71.52  
71.03  
70.57  
70.41  
69.02  
68.67  
68.36  
60.41  
60.24  
60.17

40.53  
40.22  
20.92  
20.81  
20.70  
19.44  
19.42  
19.35  
19.32  
17.53  
17.43  
14.51  
14.45

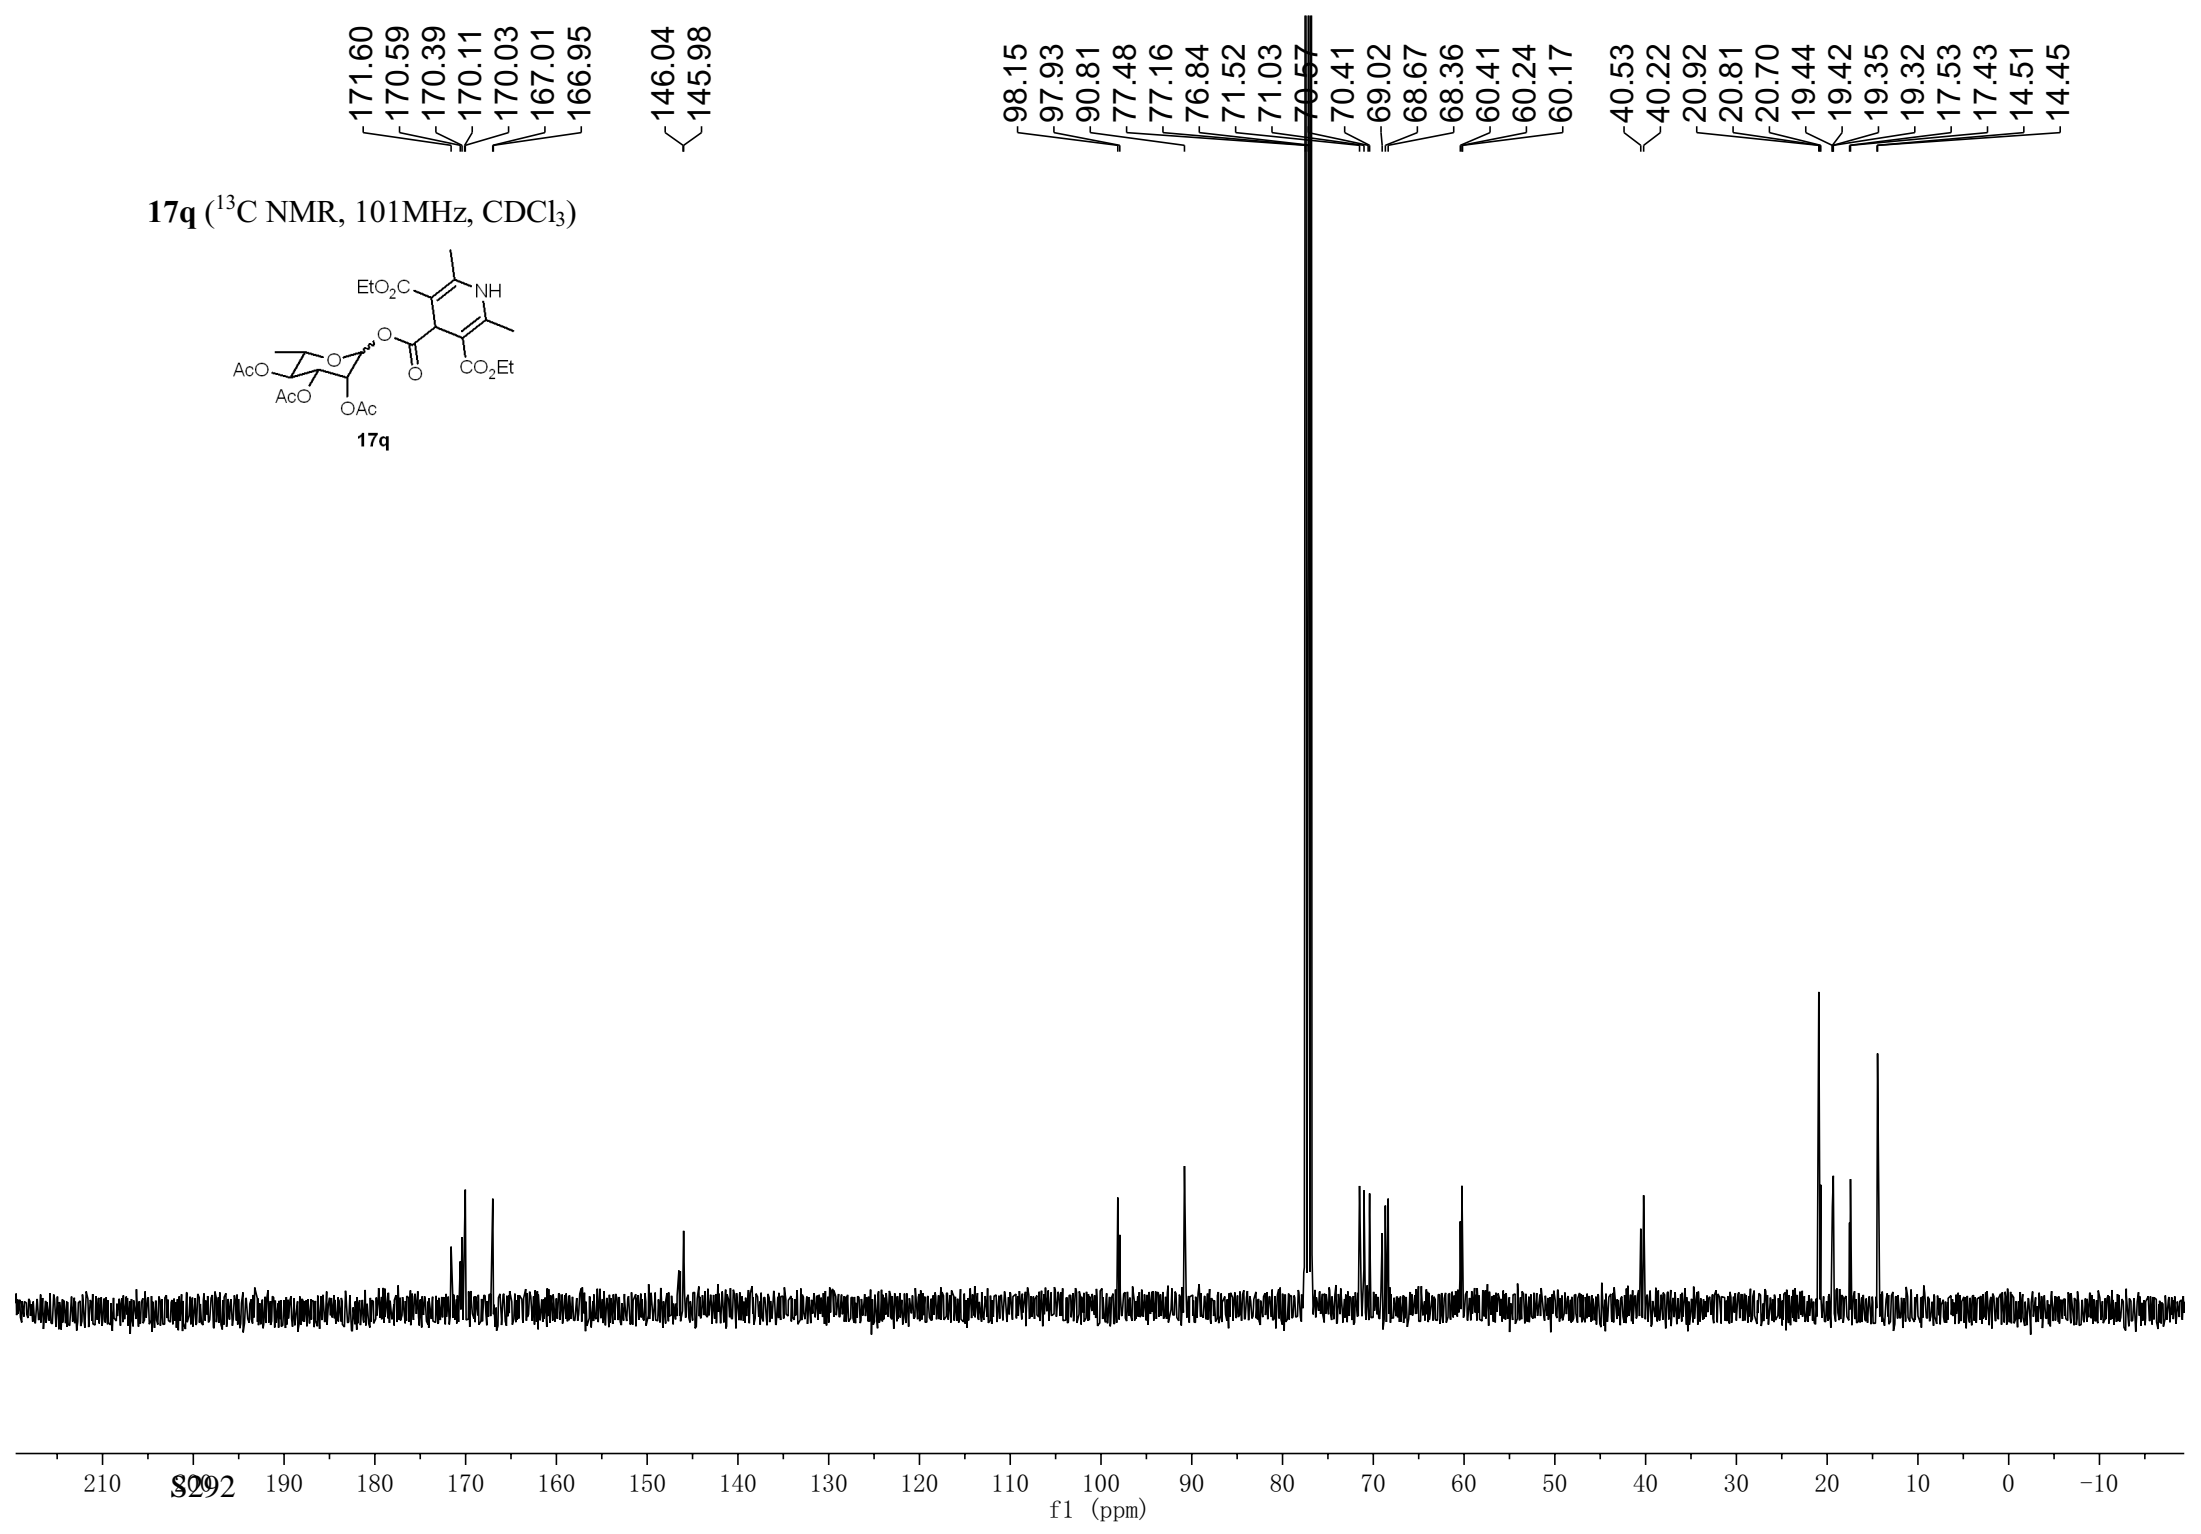

7.98  
7.98  
7.97  
7.96  
7.96  
7.95  
7.94  
7.94  
7.93  
7.93  
7.91  
7.91  
7.79  
7.67  
7.65  
7.65  
7.45  
7.45  
7.43  
7.43  
7.43  
7.42  
7.41  
7.41  
7.41  
7.40  
7.40  
7.39  
7.39  
7.38  
7.38  
7.37  
7.37  
7.37  
7.36  
7.36  
7.35  
7.34  
7.34  
7.33  
7.33  
7.33  
7.32  
7.32  
7.32  
7.30  
7.30  
7.28  
7.27  
7.27  
7.26  
7.25  
7.18  
7.16  
5.71  
4.65  
4.57  
3.92  
2.39  
1.10

**17sd** ( $^1\text{H}$  NMR, 400MHz,  $\text{CDCl}_3$ )

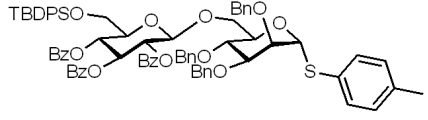

**17sd**

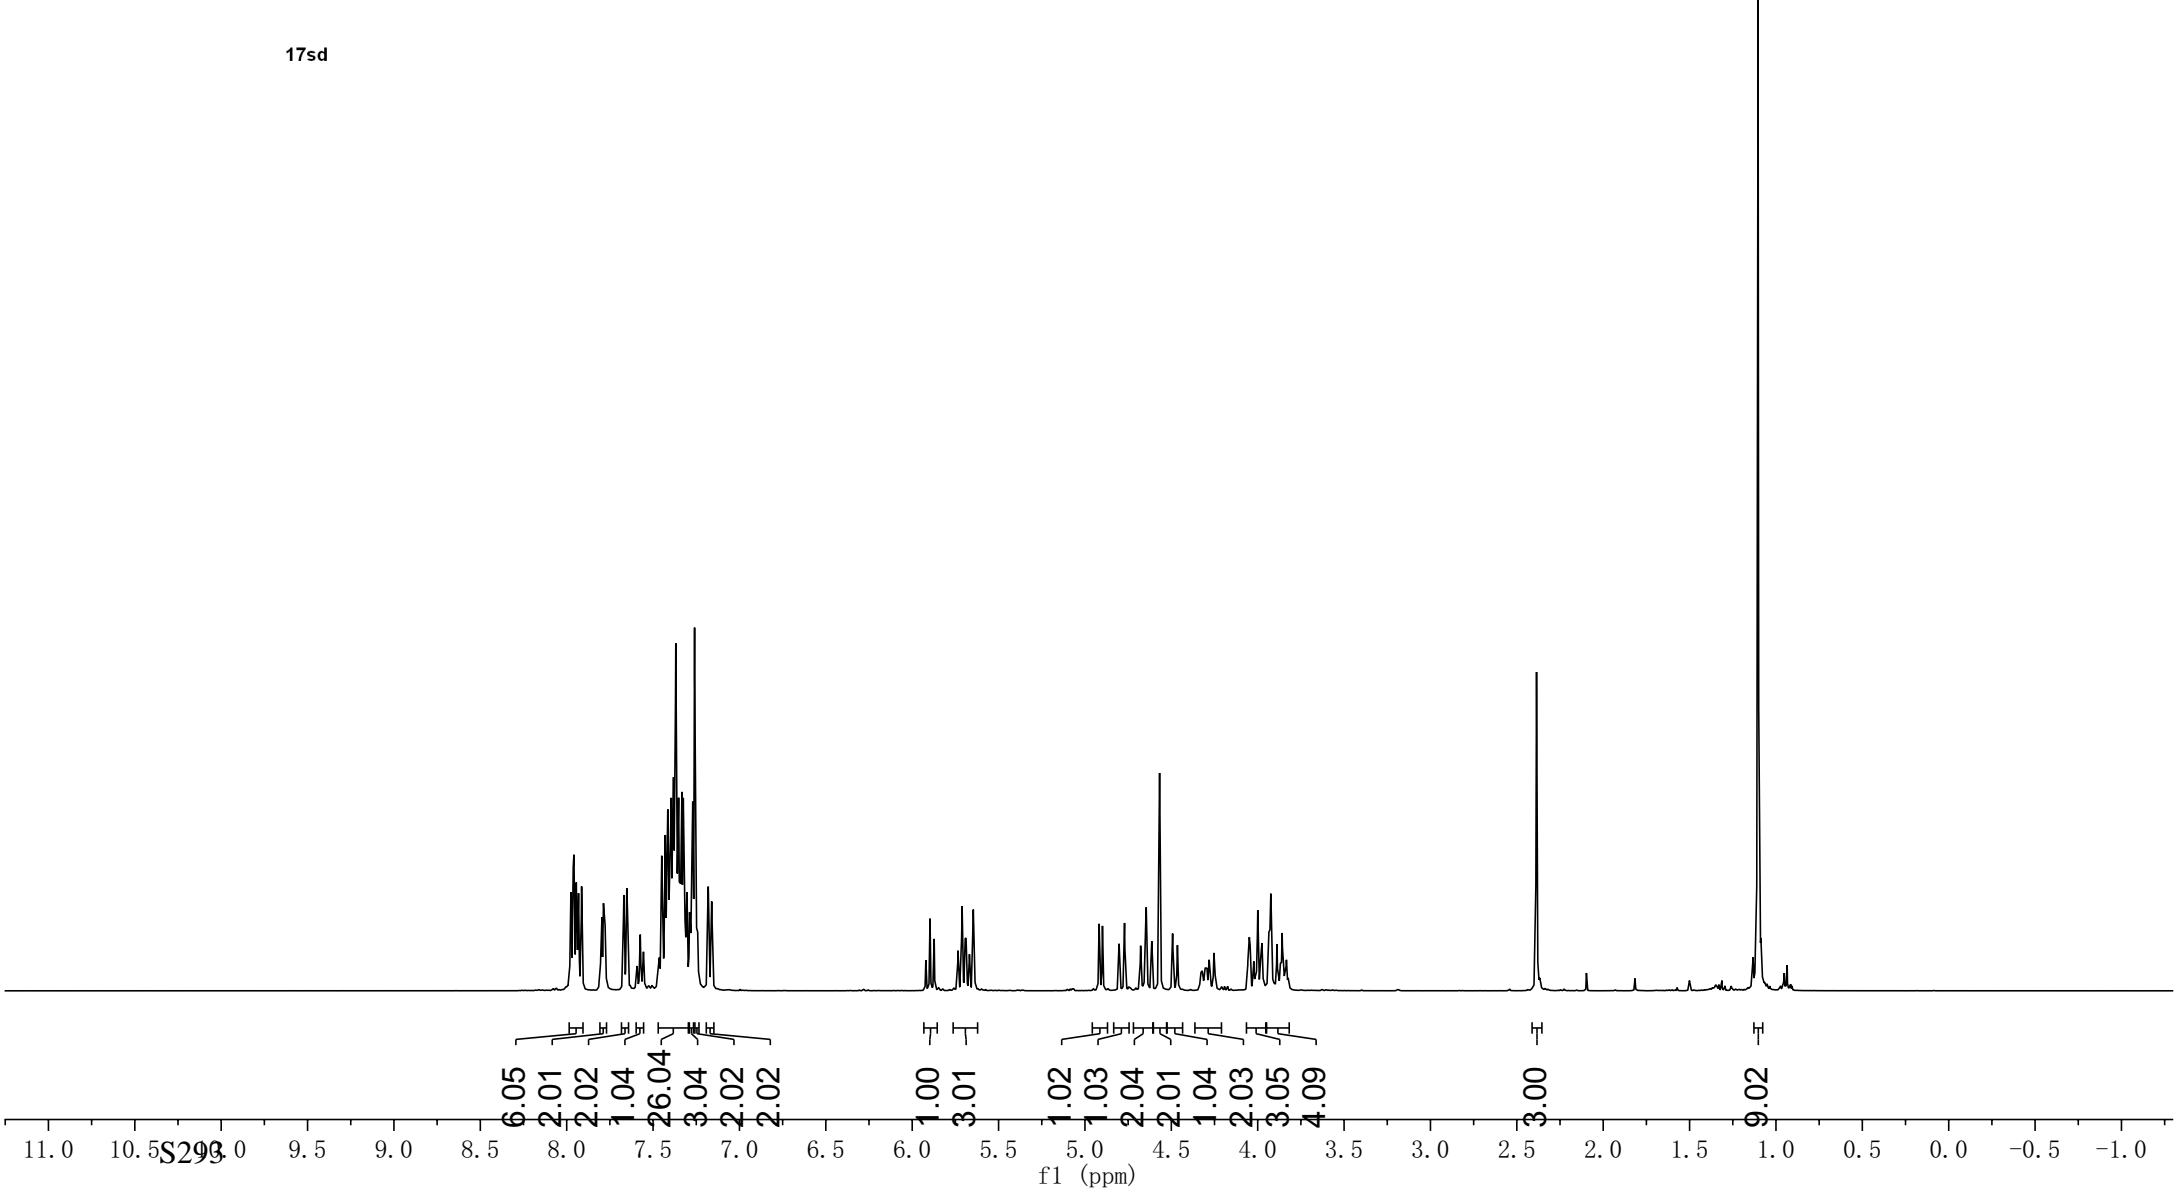



166.04  
 165.10  
 165.05  
 138.57  
 138.27  
 138.08  
 137.47  
 135.71  
 135.56  
 133.26  
 133.14  
 133.03  
 132.84  
 131.58  
 130.93  
 129.96  
 129.90  
 129.84  
 129.81  
 129.70  
 129.67  
 129.65  
 129.33  
 129.07  
 128.40  
 128.35  
 128.30  
 128.26  
 127.95  
 127.75  
 127.72  
 127.68  
 127.61  
 101.26  
 86.16  
 80.15  
 77.48  
 77.16  
 76.84  
 75.91  
 75.28  
 74.82  
 74.46  
 73.54  
 72.78  
 72.09  
 71.79  
 71.71  
 69.37  
 68.25  
 62.83  
 26.70  
 21.18  
 19.19

**17sd** (<sup>13</sup>C NMR, 101MHz, CDCl<sub>3</sub>)

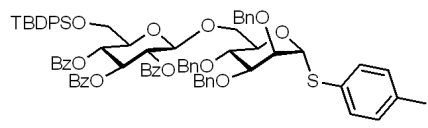

17sd

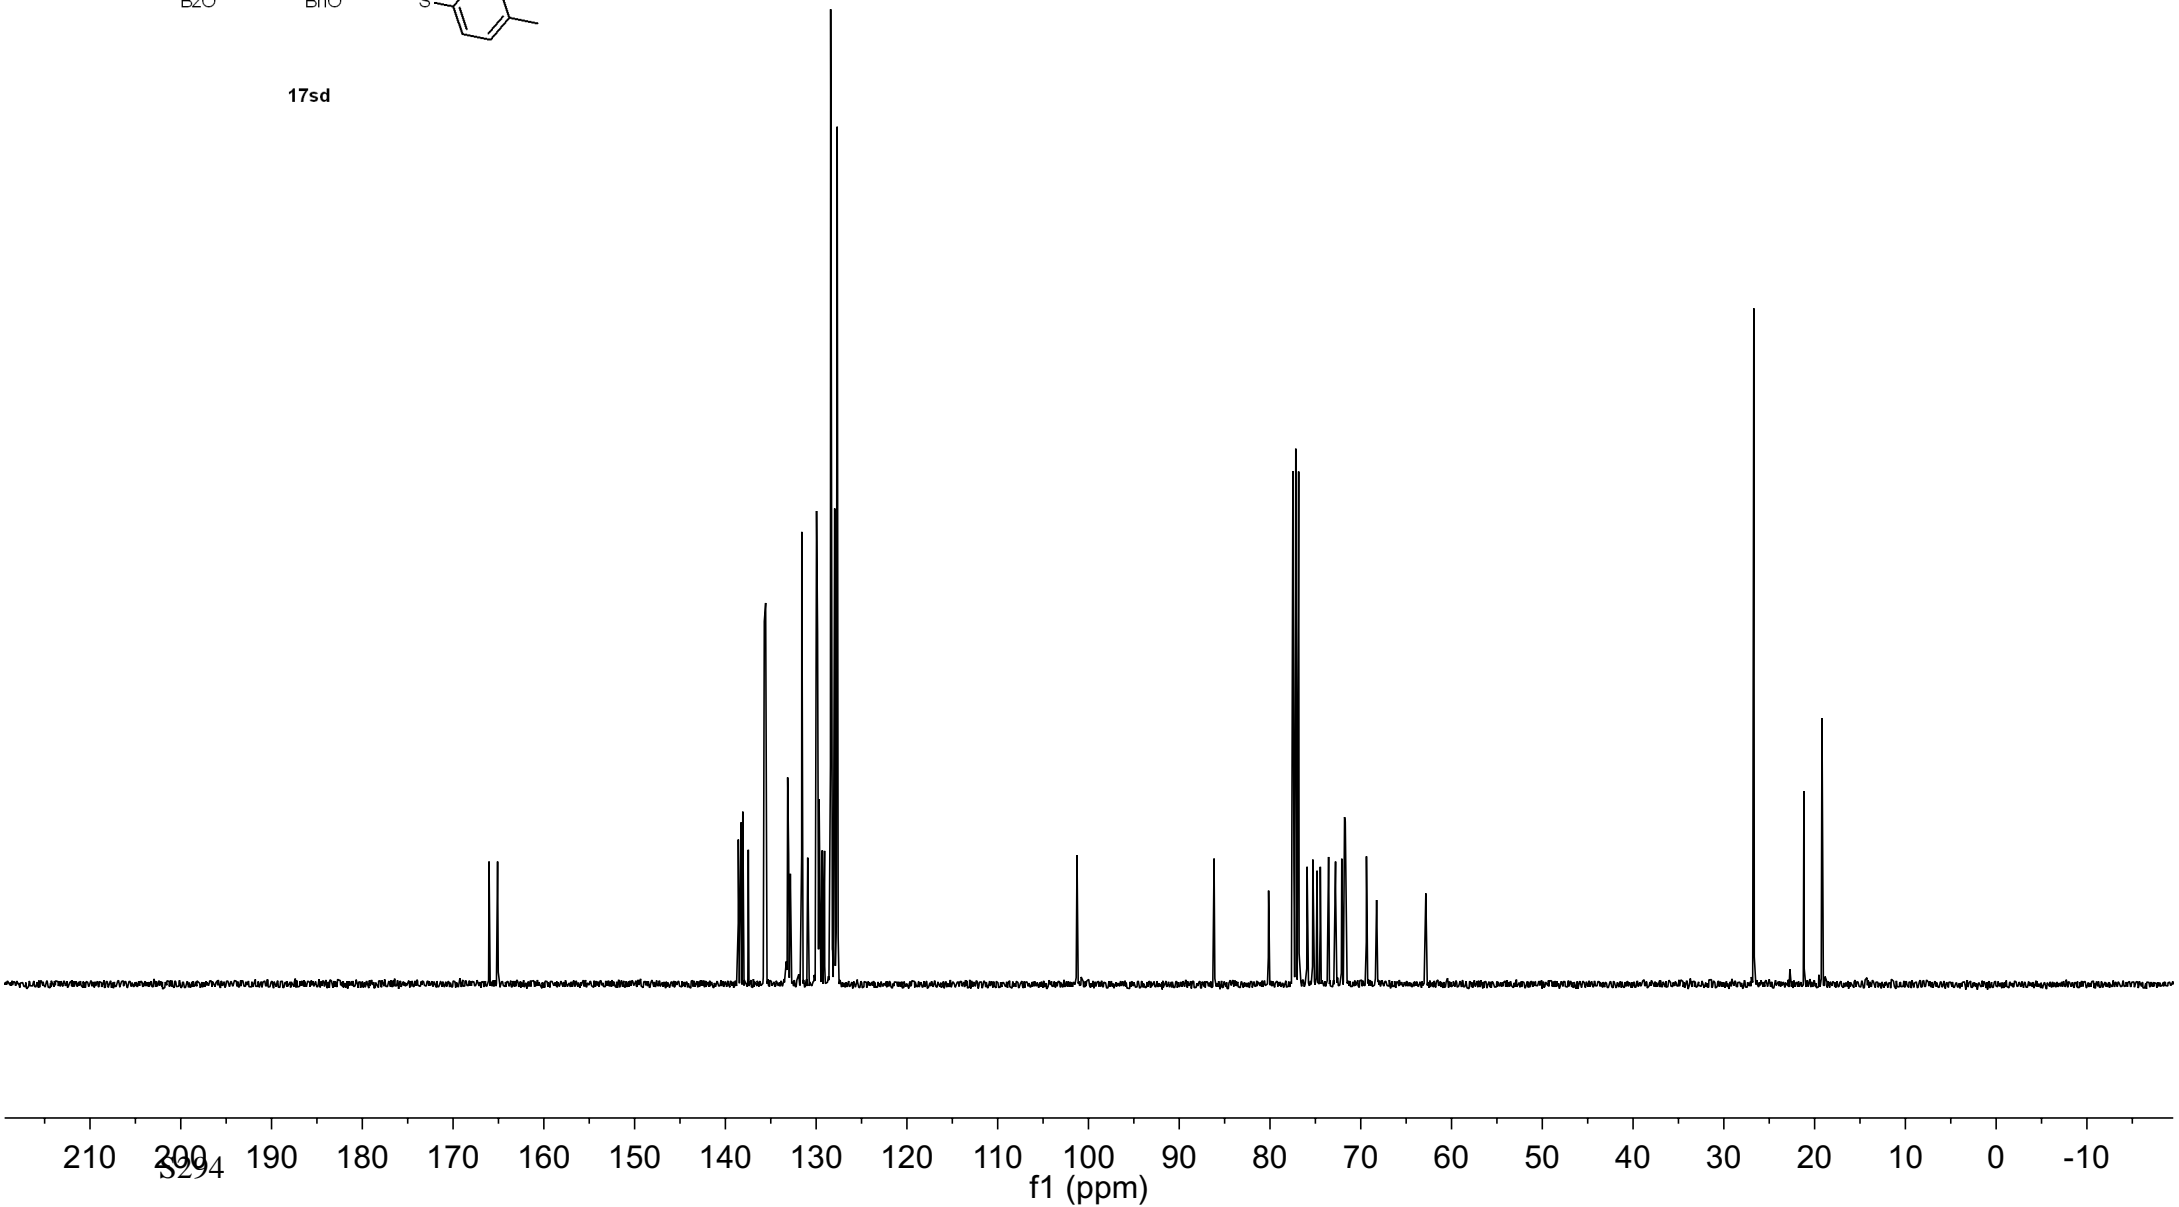

S294

7.92 7.92 7.91 7.90 7.89 7.89 7.89 7.87 7.87 7.77 7.64 7.62 7.62 7.60 7.57 7.57 7.55 7.55 7.49 7.42 7.38 7.37 7.37 7.36 7.36 7.35 7.35 7.35 7.34 7.33 7.33 7.32 7.32 7.31 7.31 7.30 7.30 7.30 7.29 7.29 7.27 7.26 7.25 7.25 7.24 7.24 5.56 5.33 4.43 4.39 2.66 2.21 1.40 1.39 1.37 1.29 1.27 1.26 1.08

**17s** ( $^1\text{H}$  NMR, 400MHz,  $\text{CDCl}_3$ )

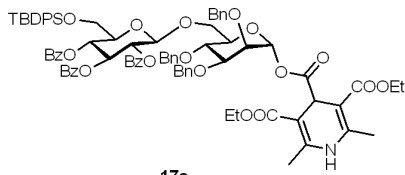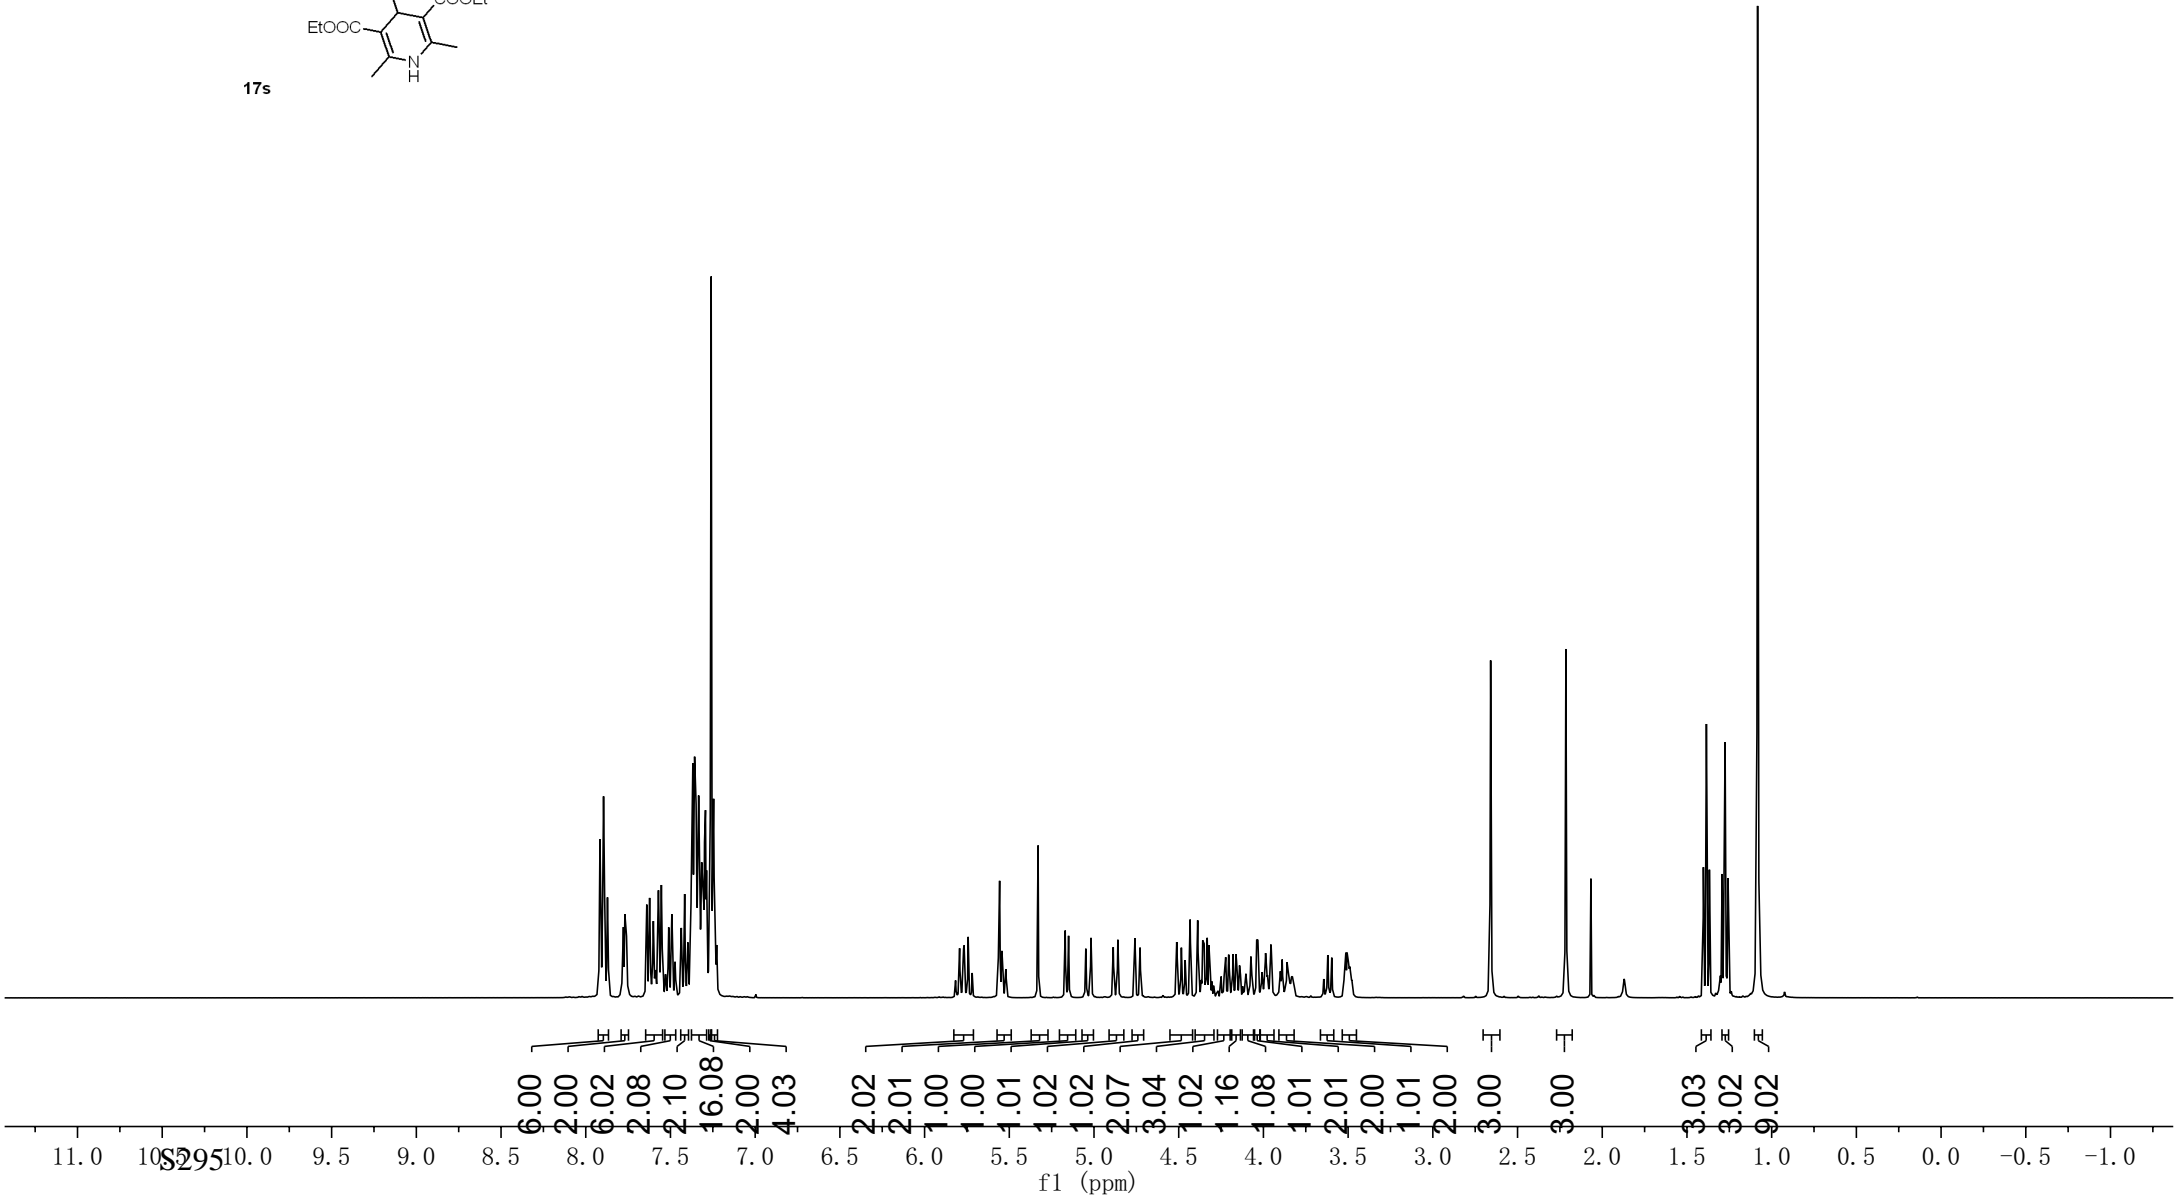

172.06  
 167.23  
 167.22  
 167.15  
 165.24  
 164.86  
 147.05  
 146.26  
 138.65  
 137.96  
 137.89  
 135.85  
 135.57  
 133.36  
 133.31  
 132.97  
 129.99  
 129.87  
 129.74  
 129.67  
 129.31  
 129.05  
 128.59  
 128.53  
 128.51  
 128.50  
 128.47  
 128.40  
 128.32  
 128.21  
 127.95  
 127.85  
 127.71  
 127.69  
 127.63  
 100.98  
 98.63  
 97.69  
 94.49  
 81.74  
 77.48  
 77.16  
 76.84  
 75.20  
 74.85  
 74.44  
 74.41  
 74.00  
 71.61  
 71.35  
 60.35  
 60.17  
 39.84  
 26.74  
 19.59  
 19.26  
 18.73  
 14.60  
 14.52

**17s** (<sup>13</sup>C NMR, 101MHz, CDCl<sub>3</sub>)

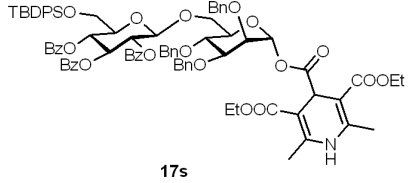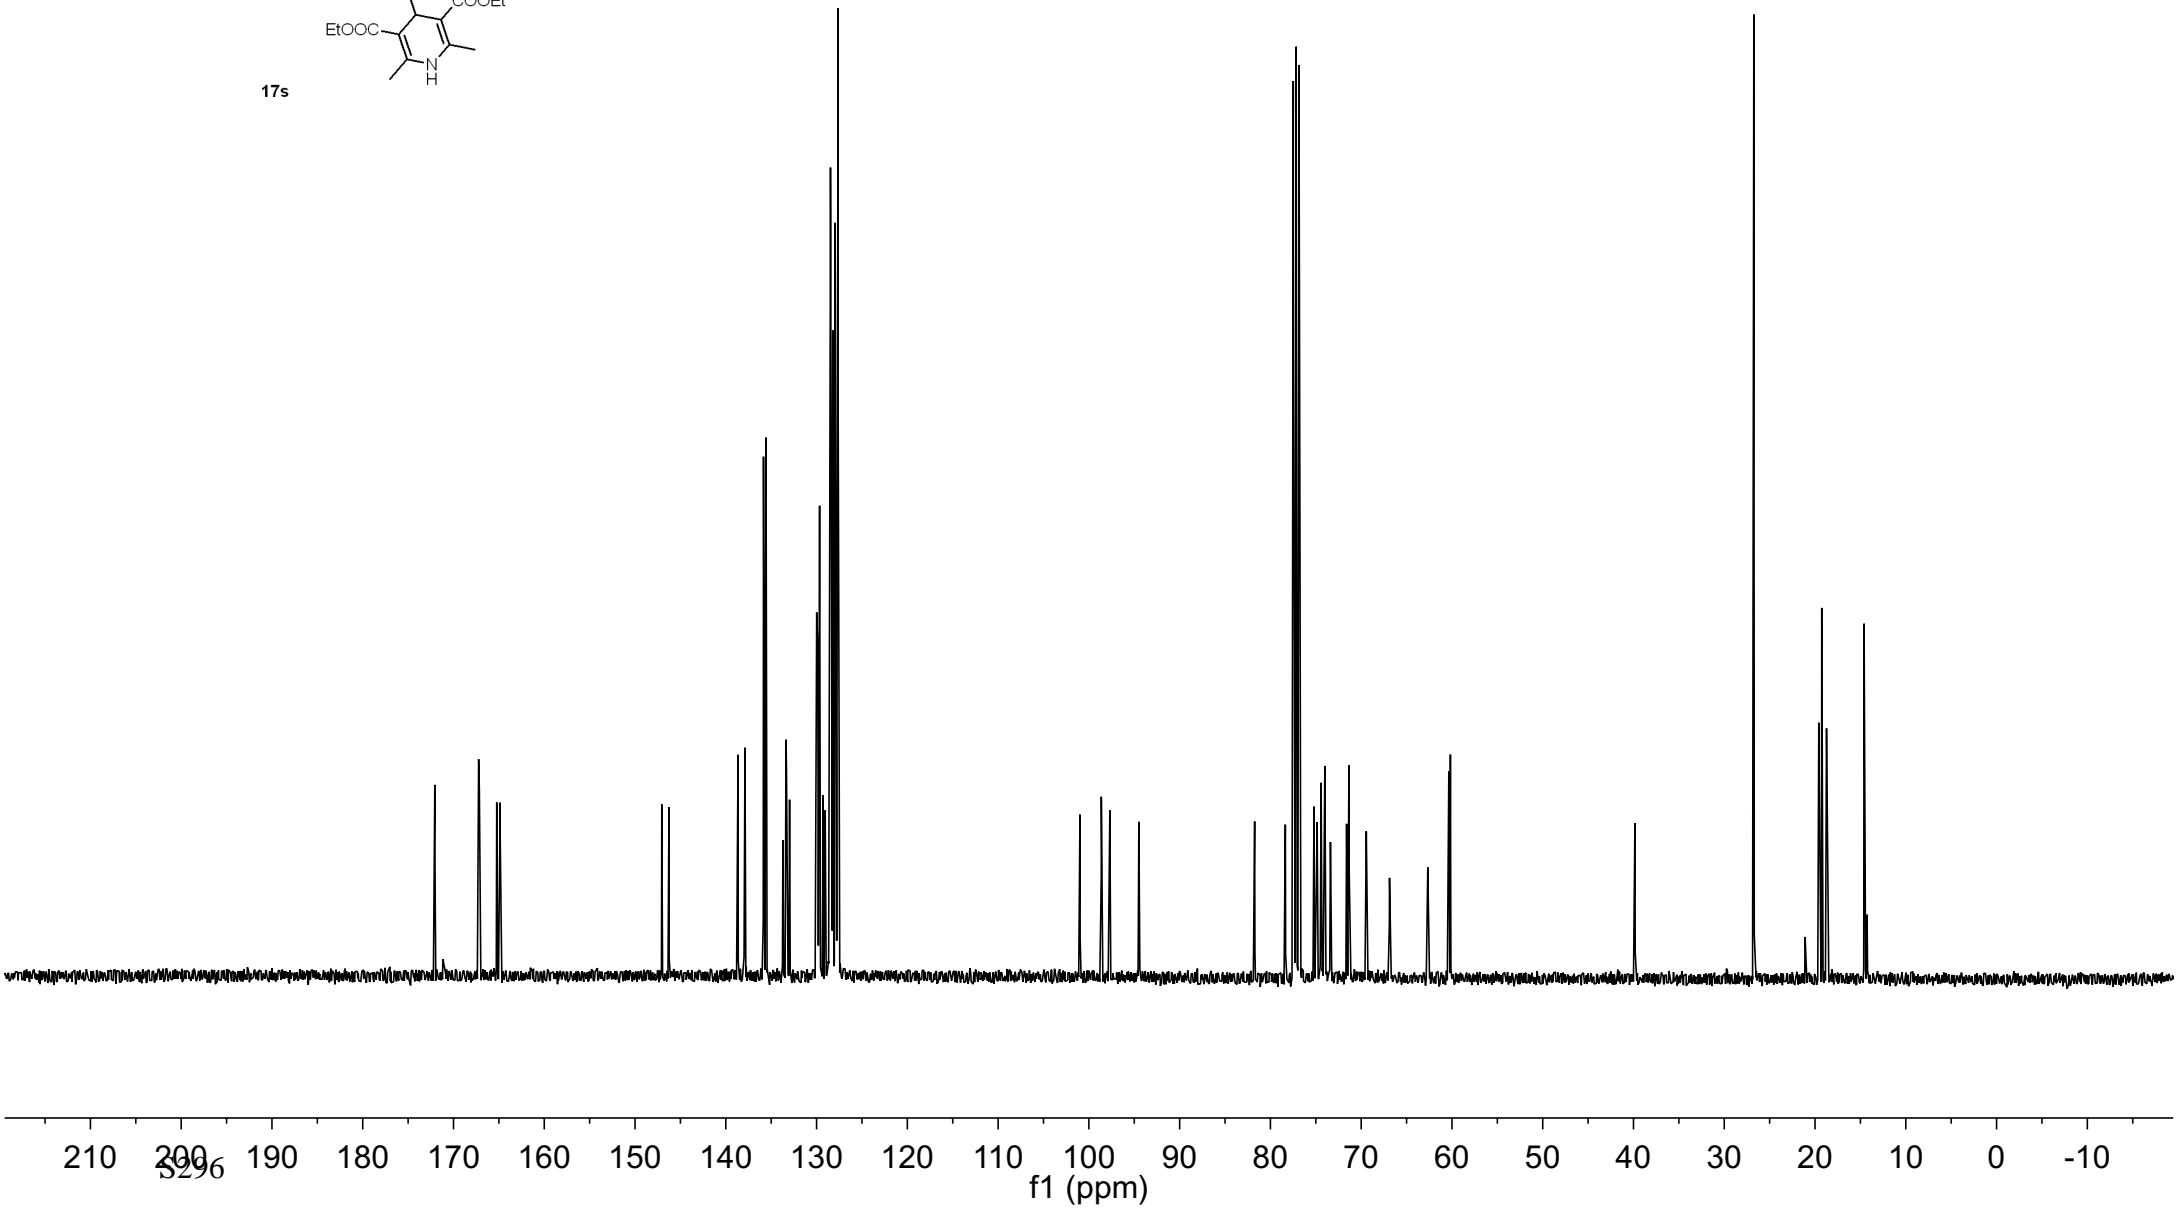

7.53  
7.51  
7.47  
7.46  
7.45  
7.41  
7.40  
7.40  
7.39  
7.39  
7.38  
7.37  
7.36  
7.36  
7.35  
7.35  
7.34  
7.34  
7.33  
7.33  
7.33  
7.32  
7.32  
7.31  
7.31  
7.30  
7.29  
7.29  
7.28  
7.27  
7.26  
7.18  
7.16  
7.16  
7.06  
7.04  
5.05  
5.02  
4.85  
4.85  
4.84  
4.77  
4.76  
4.74  
4.64  
4.62  
4.59  
4.59  
4.56  
4.52  
4.50  
4.47  
4.37  
4.30  
3.99  
3.98  
3.66  
3.45  
2.34

**17tb** (<sup>1</sup>H NMR, 400MHz, CDCl<sub>3</sub>)

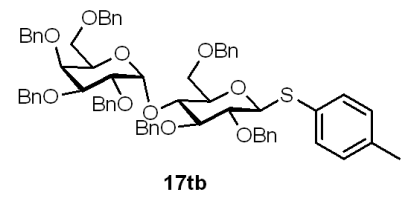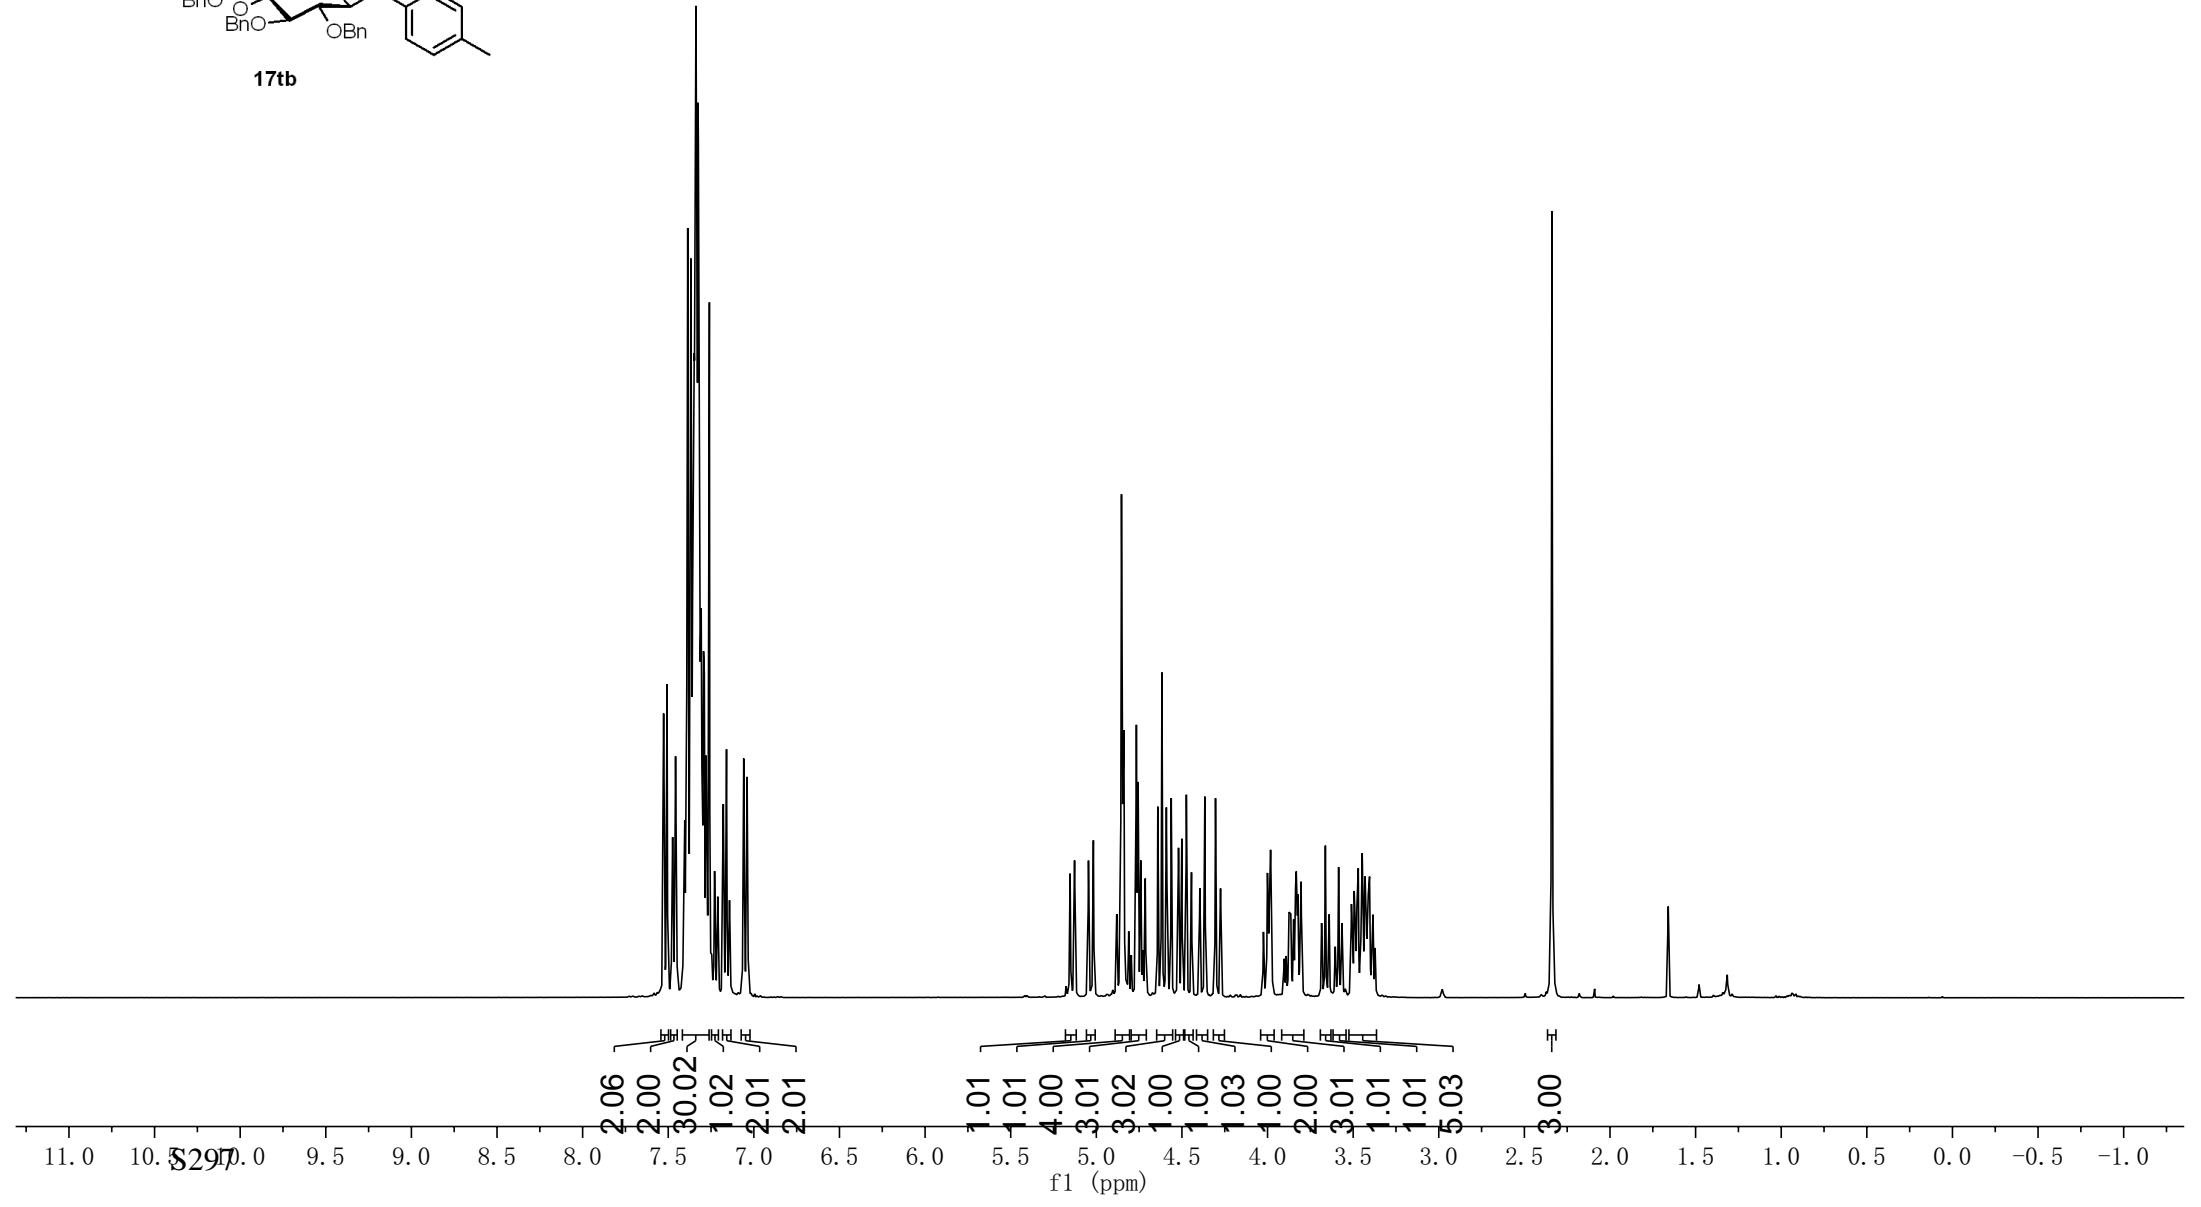

139.15  
139.02  
138.82  
138.65  
138.61  
138.17  
132.93  
129.72  
129.70  
128.49  
128.47  
128.46  
128.34  
128.32  
128.27  
128.26  
128.14  
128.00  
127.94  
127.83  
127.81  
127.63  
127.58  
127.57  
127.52  
127.48  
127.44  
127.39

87.62  
85.14  
82.66  
80.13  
80.10  
79.50  
77.48  
77.16  
76.84  
76.56  
75.72  
75.57  
75.43  
74.83  
73.69  
73.50  
73.13  
73.09  
72.70  
68.48  
68.11  
21.23

**17tb** ( $^{13}\text{C}$  NMR, 101MHz,  $\text{CDCl}_3$ )

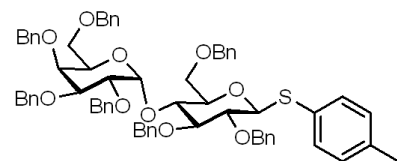

**17tb**

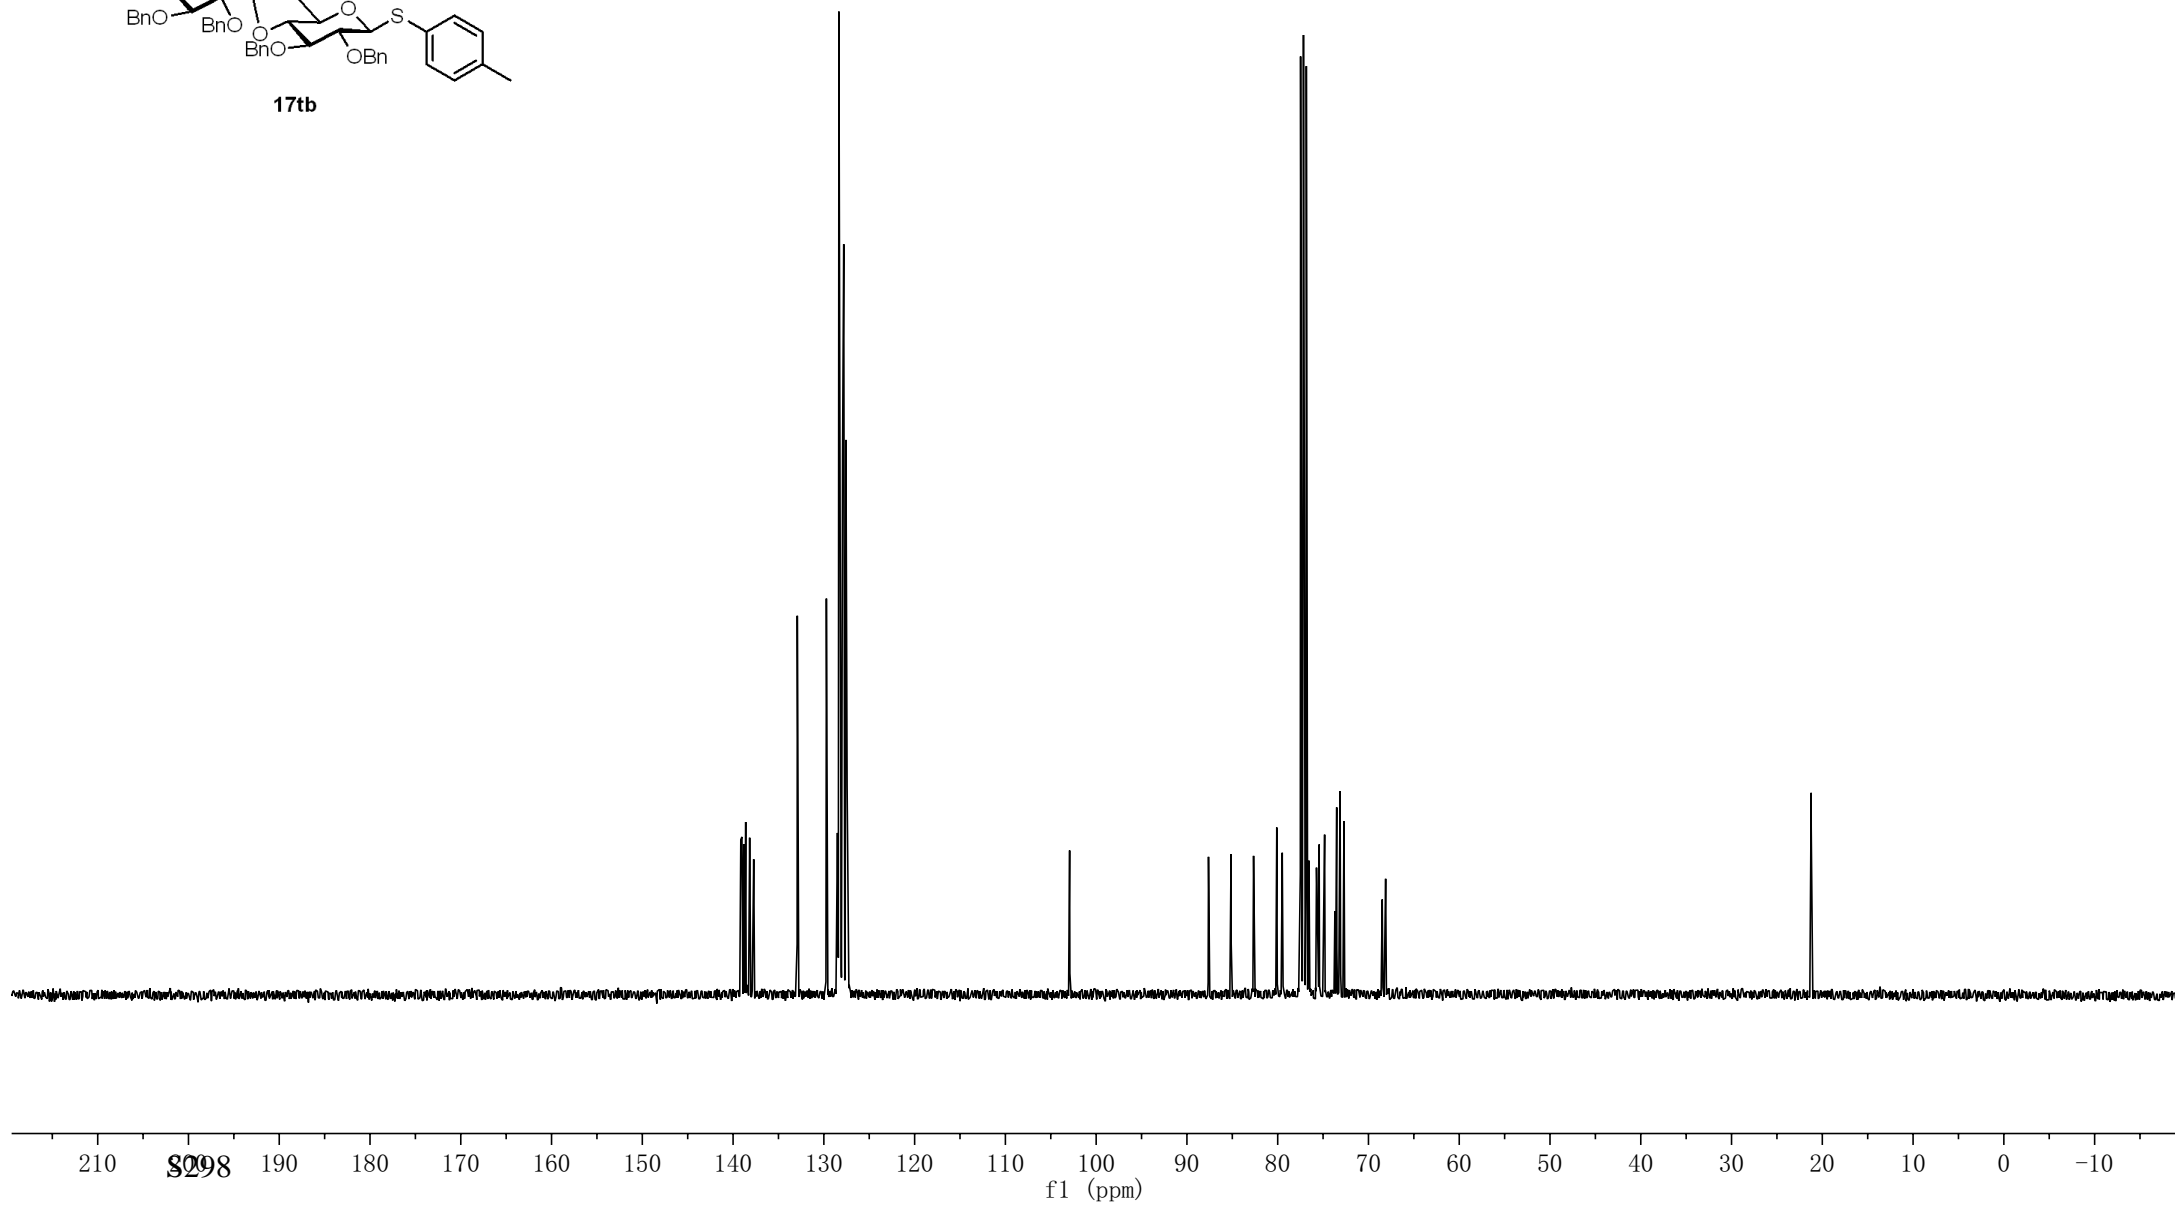

7.39 7.39 7.38 7.37 7.36 7.36 7.35 7.34 7.34 7.32 7.31 7.30 7.29 7.29 7.28 7.27 7.26 7.25 7.16 7.15 7.14 5.64 5.62 5.09 5.06 5.02 4.83 4.81 4.80 4.76 4.76 4.75 4.62 4.53 4.52 4.50 4.40 4.39 4.33 4.20 4.19 4.18 4.18 4.13 4.10 3.98 3.97 3.64 3.46 3.43 3.42 2.27 2.18 1.28 1.27 1.27 1.25 1.25 1.23

**17t** (<sup>1</sup>H NMR, 400MHz, CDCl<sub>3</sub>)

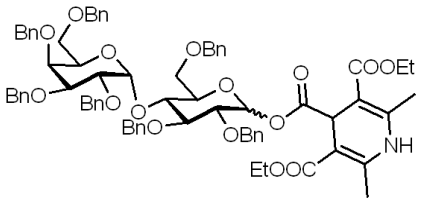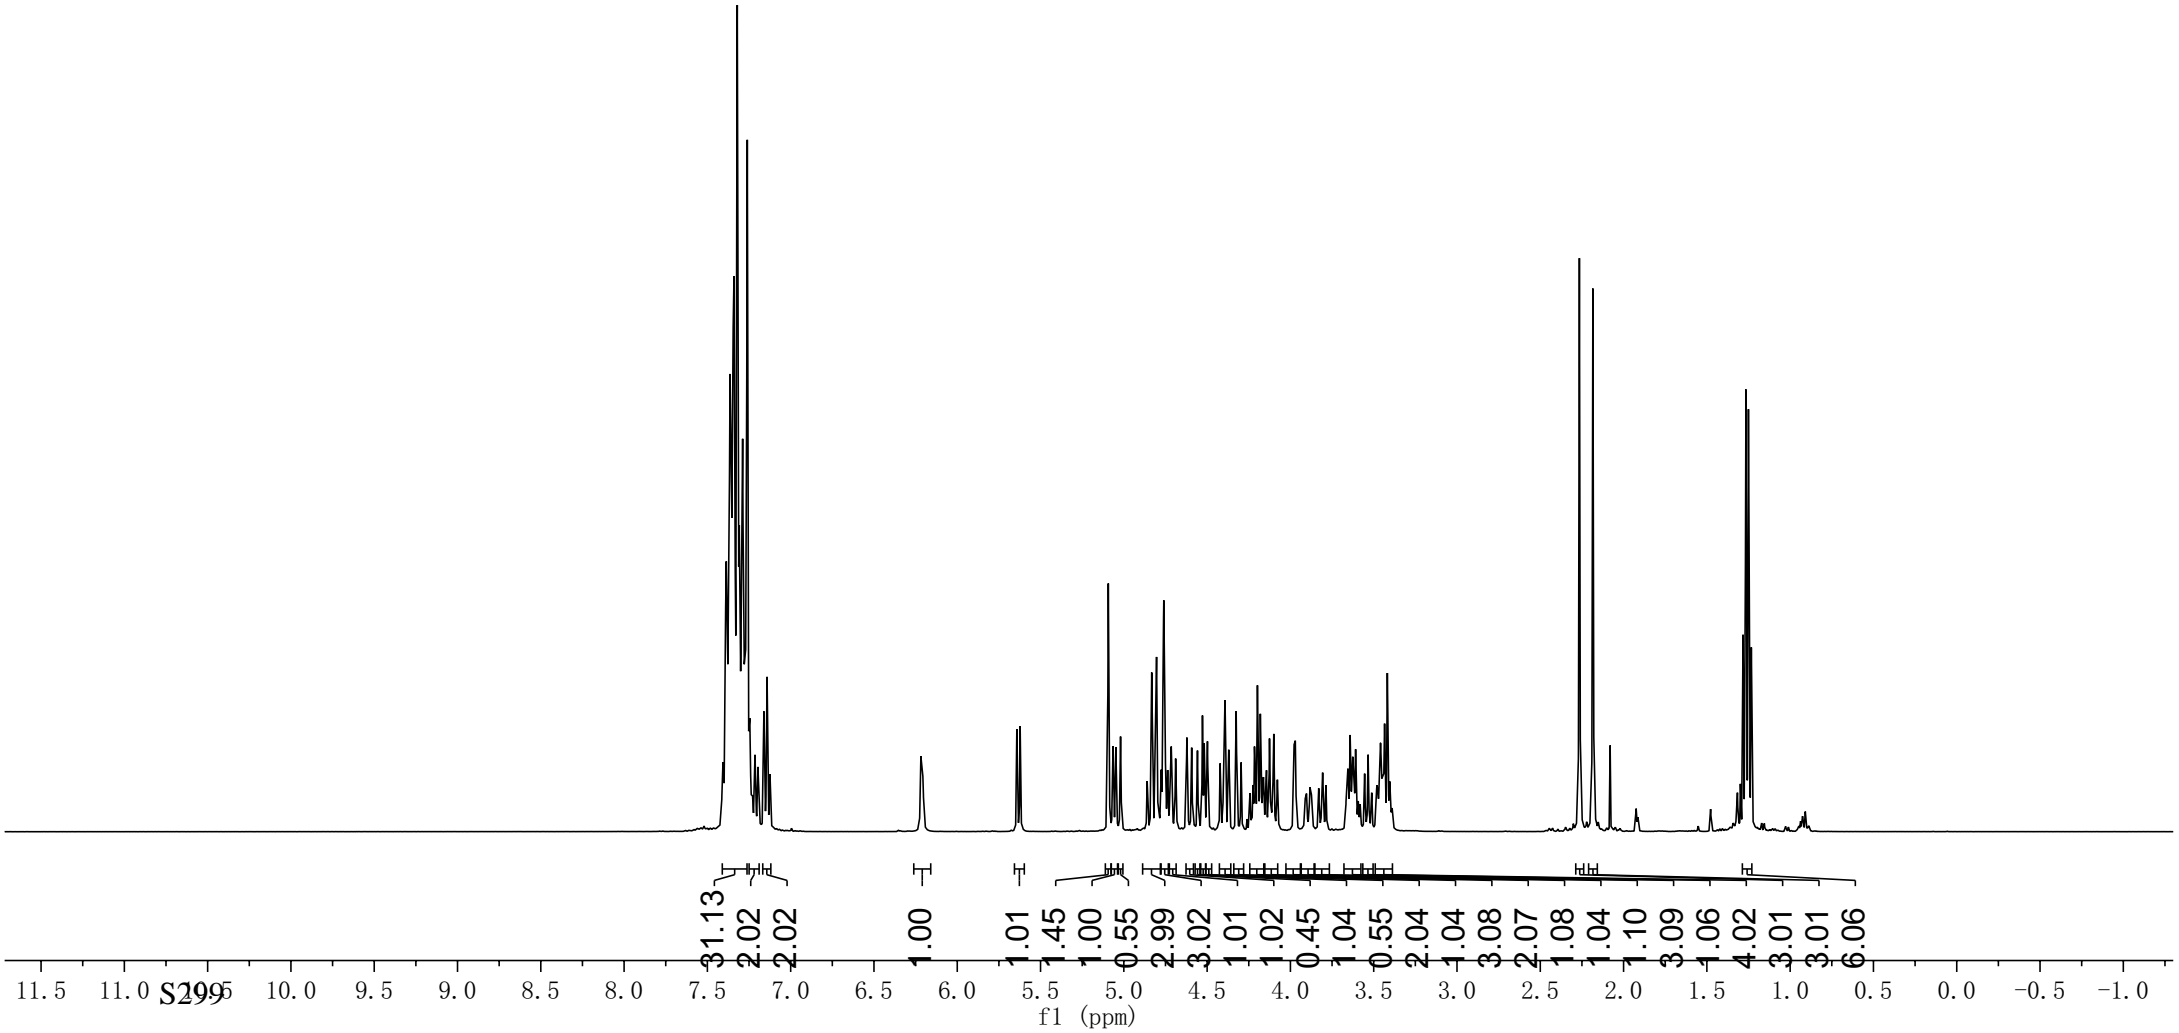

172.63  
167.07  
167.05  
146.17  
145.98  
139.12  
138.94  
138.71  
138.65  
138.59  
138.28  
138.11  
128.46  
128.42  
128.31  
128.29  
128.28  
128.22  
128.04  
128.00  
127.91  
127.78  
127.67  
127.62  
127.59  
127.53  
127.50  
127.47  
127.41  
127.24  
102.63  
98.03  
97.76  
94.82  
82.98  
82.55  
80.59  
80.01  
77.48  
77.16  
76.84  
75.97  
75.75  
75.56  
75.43  
74.79  
74.73  
73.73  
73.46  
73.08  
73.02  
72.67  
68.11  
60.12  
60.09  
40.45  
19.17  
19.10  
14.48

**17t** ( $^{13}\text{C}$  NMR, 101MHz,  $\text{CDCl}_3$ )

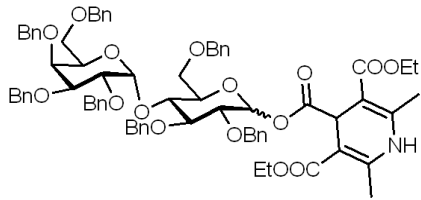

**17t**

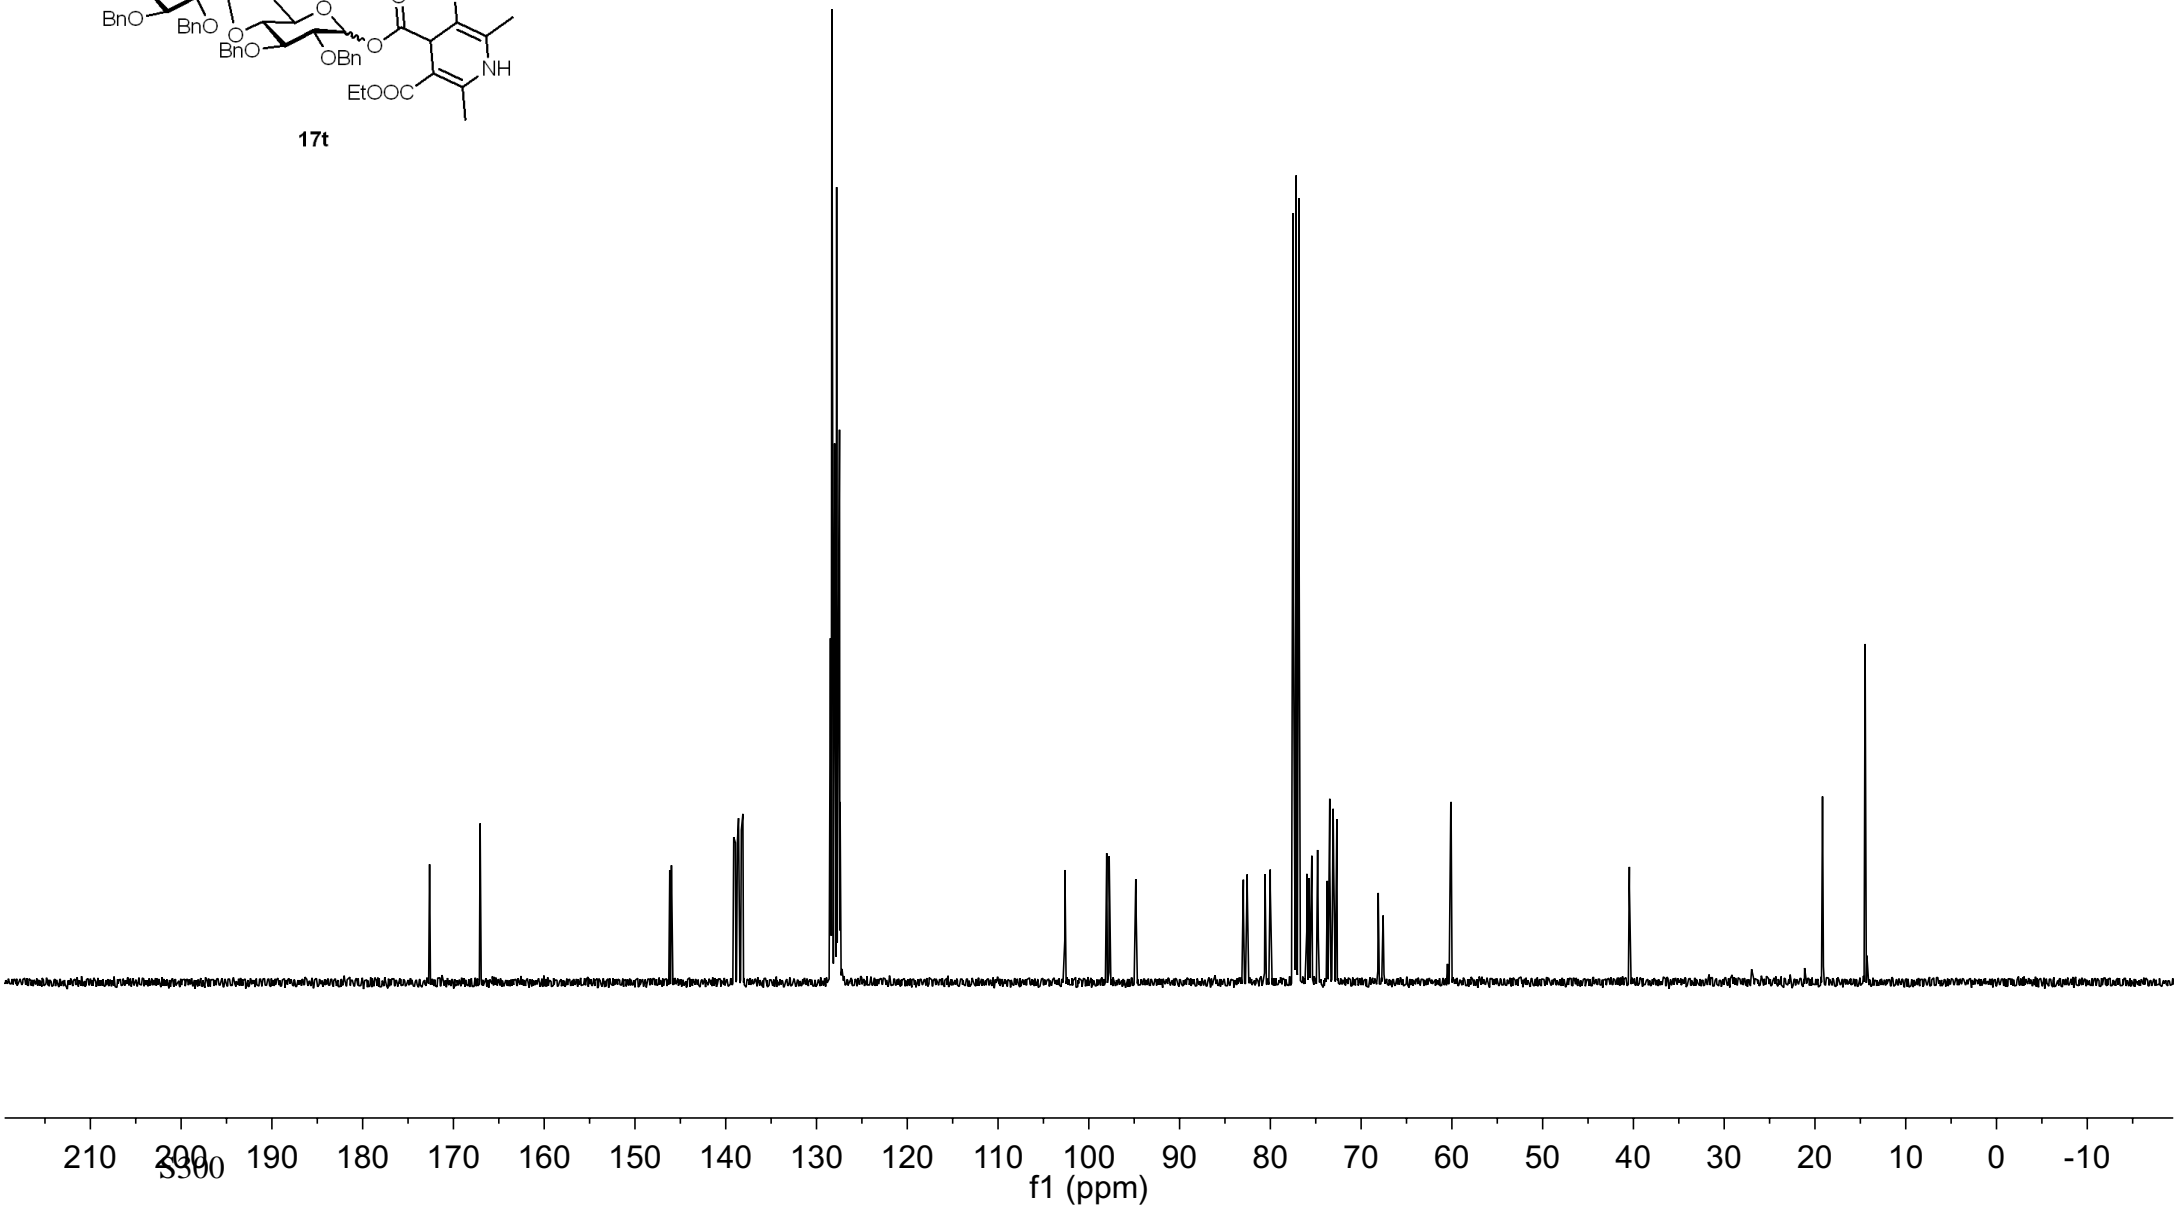

S90

7.38  
7.37  
7.36  
7.34  
7.33  
7.32  
7.31  
7.31  
7.30  
7.30  
7.29  
7.29  
7.28  
7.16  
7.14  
5.48  
5.48  
5.41  
5.40  
5.40  
5.38  
5.38  
5.20  
5.06  
5.00  
4.97  
4.89  
4.88  
4.87  
4.86  
4.85  
4.72  
4.69  
4.58  
4.57  
4.55  
4.50  
4.48  
4.24  
4.23  
4.04  
4.03  
4.00  
4.00  
3.99  
3.97  
3.95  
3.88  
3.86  
3.86  
3.85  
3.84  
2.34  
2.09  
2.08  
2.03  
2.01  
1.99  
1.91

**17ud** (<sup>1</sup>H NMR, 400MHz, CDCl<sub>3</sub>)

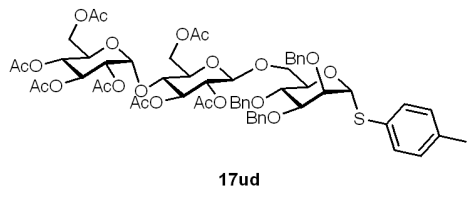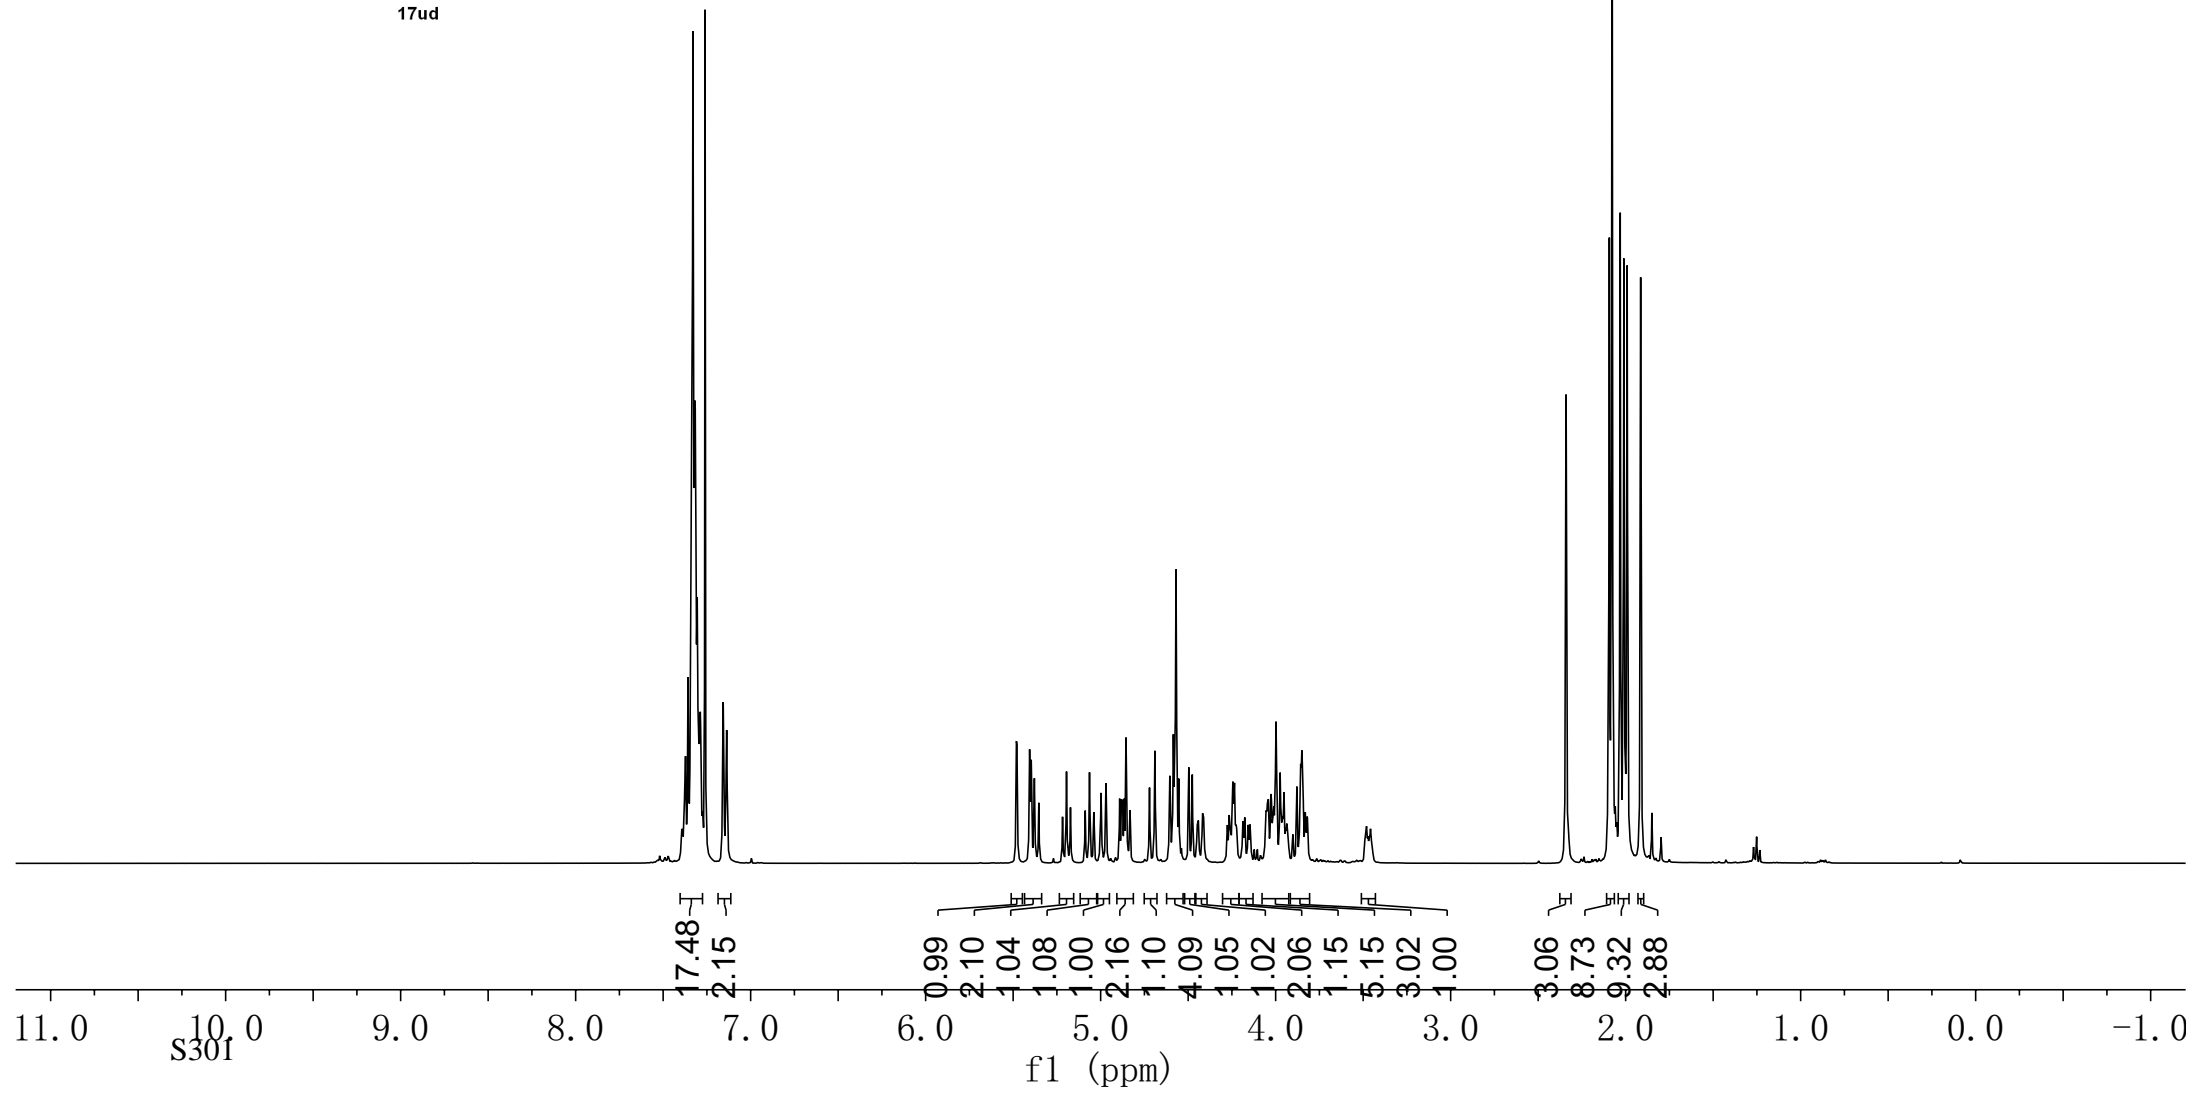



170.51  
170.49  
170.26  
169.94  
169.59  
169.41  
138.41  
138.02  
137.76  
137.73  
132.02  
130.69  
129.92  
128.55  
128.44  
128.42  
127.98  
127.89  
127.84  
127.79  
127.76  
100.26  
95.54  
86.34  
80.02  
77.16  
75.96  
75.54  
75.06  
74.62  
72.97  
72.74  
72.11  
71.89  
71.87  
71.77  
69.99  
69.34  
68.44  
68.42  
68.01  
62.81  
61.47  
21.11  
20.95  
20.81  
20.70  
20.64  
20.61  
20.57  
14.23

**17ud** ( $^{13}\text{C}$  NMR, 101MHz,  $\text{CDCl}_3$ )

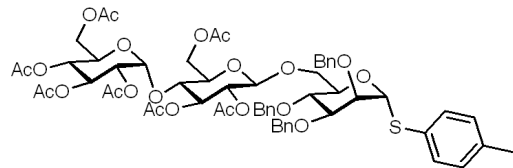

**17ud**

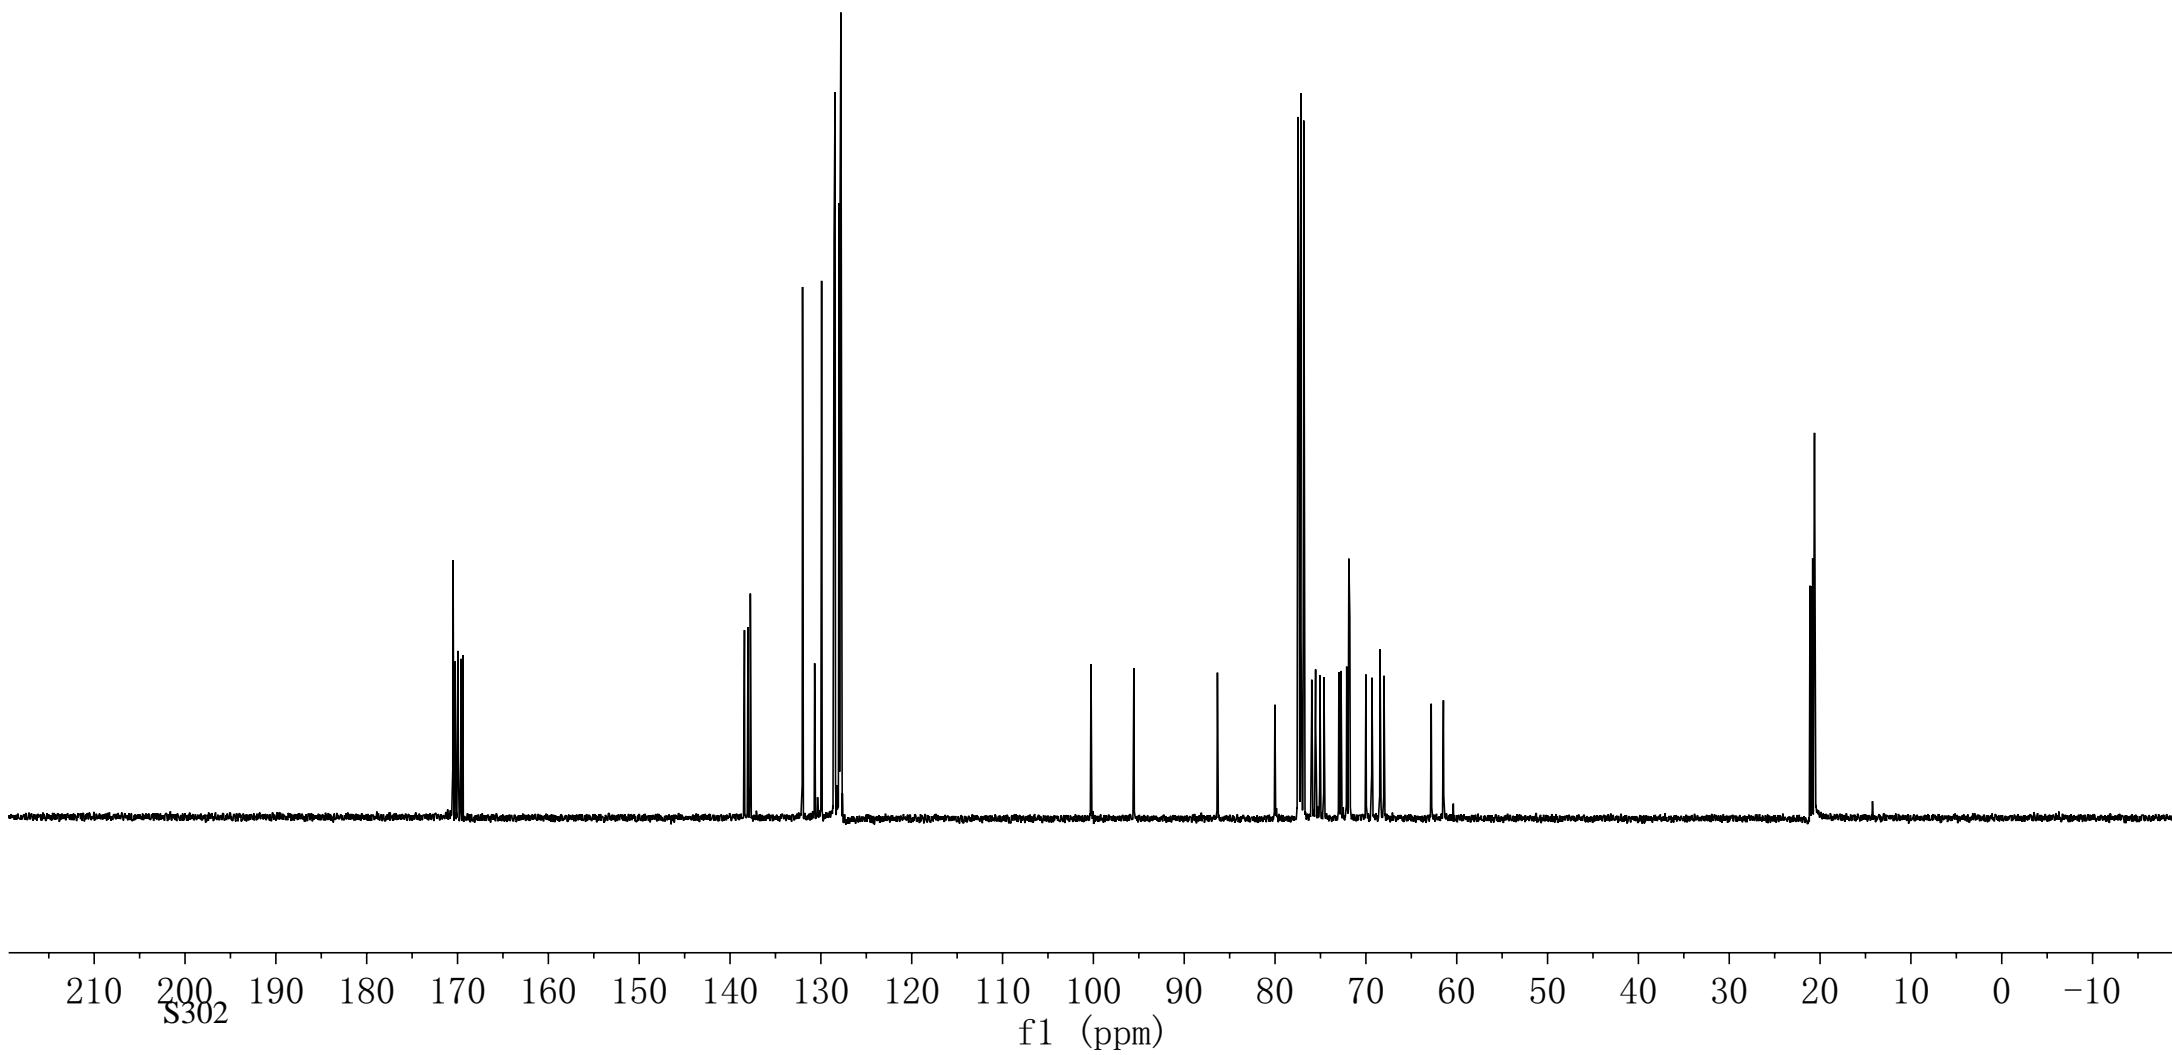

7.50  
7.49  
7.47  
7.47  
7.33  
7.32  
7.31  
7.31  
7.29  
7.29  
7.28  
7.28  
7.27  
7.27  
7.26  
7.25  
7.25  
7.24  
7.23  
7.23  
6.78  
5.54  
5.36  
5.35  
5.13  
5.06  
5.05  
4.92  
4.92  
4.89  
4.68  
4.56  
4.54  
4.53  
4.44  
4.40  
4.21  
4.20  
4.19  
4.18  
4.15  
4.13  
4.01  
3.94  
3.91  
2.36  
2.33  
2.11  
2.10  
2.05  
2.02  
2.02  
2.01  
1.92  
1.29  
1.27  
1.25  
1.24  
1.22

**17u** (<sup>1</sup>H NMR, 400MHz, CDCl<sub>3</sub>)

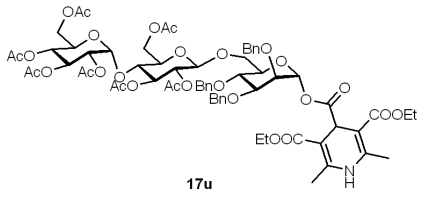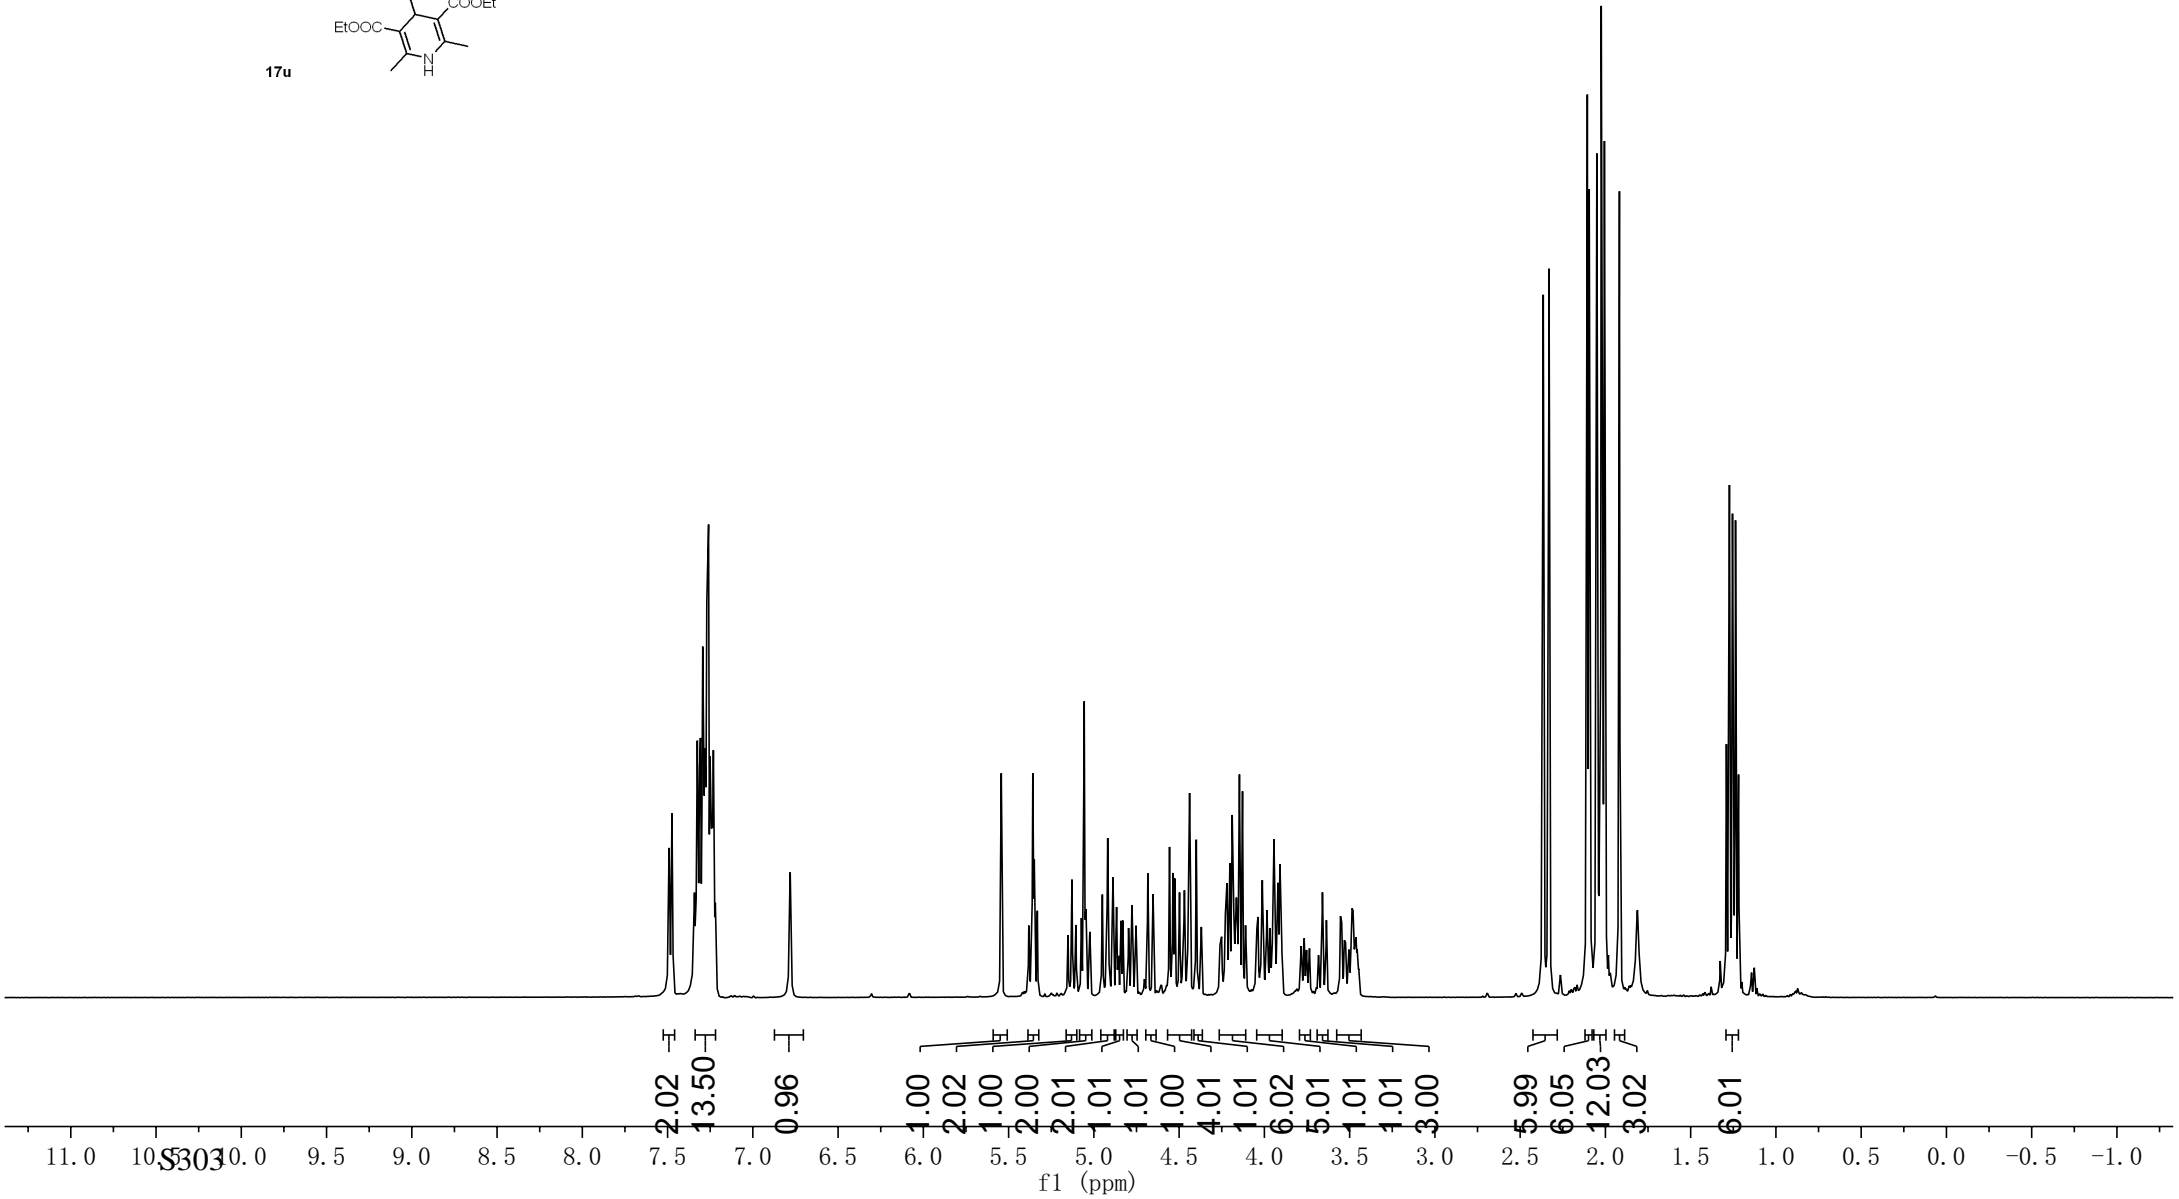

171.92  
171.04  
170.66  
170.48  
170.18  
170.07  
169.53  
167.08  
146.68  
145.84  
138.67  
138.18  
137.91  
128.55  
128.48  
128.37  
128.22  
127.97  
127.91  
127.80  
127.73  
127.68  
100.28  
98.23  
97.91  
95.74  
93.60  
81.67  
77.48  
77.16  
77.08  
76.84  
75.70  
75.07  
74.28  
73.97  
73.75  
73.09  
72.00  
71.92  
71.41  
70.31  
69.42  
68.61  
68.10  
61.57  
60.38  
60.21  
40.09  
21.16  
20.97  
20.80  
20.75  
20.70  
20.54  
19.55  
19.15  
14.55  
14.51

**17u** ( $^{13}\text{C}$  NMR, 101MHz,  $\text{CDCl}_3$ )

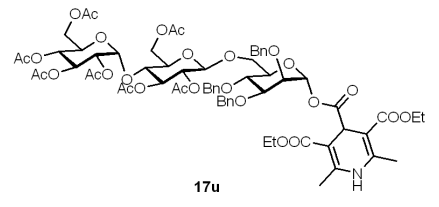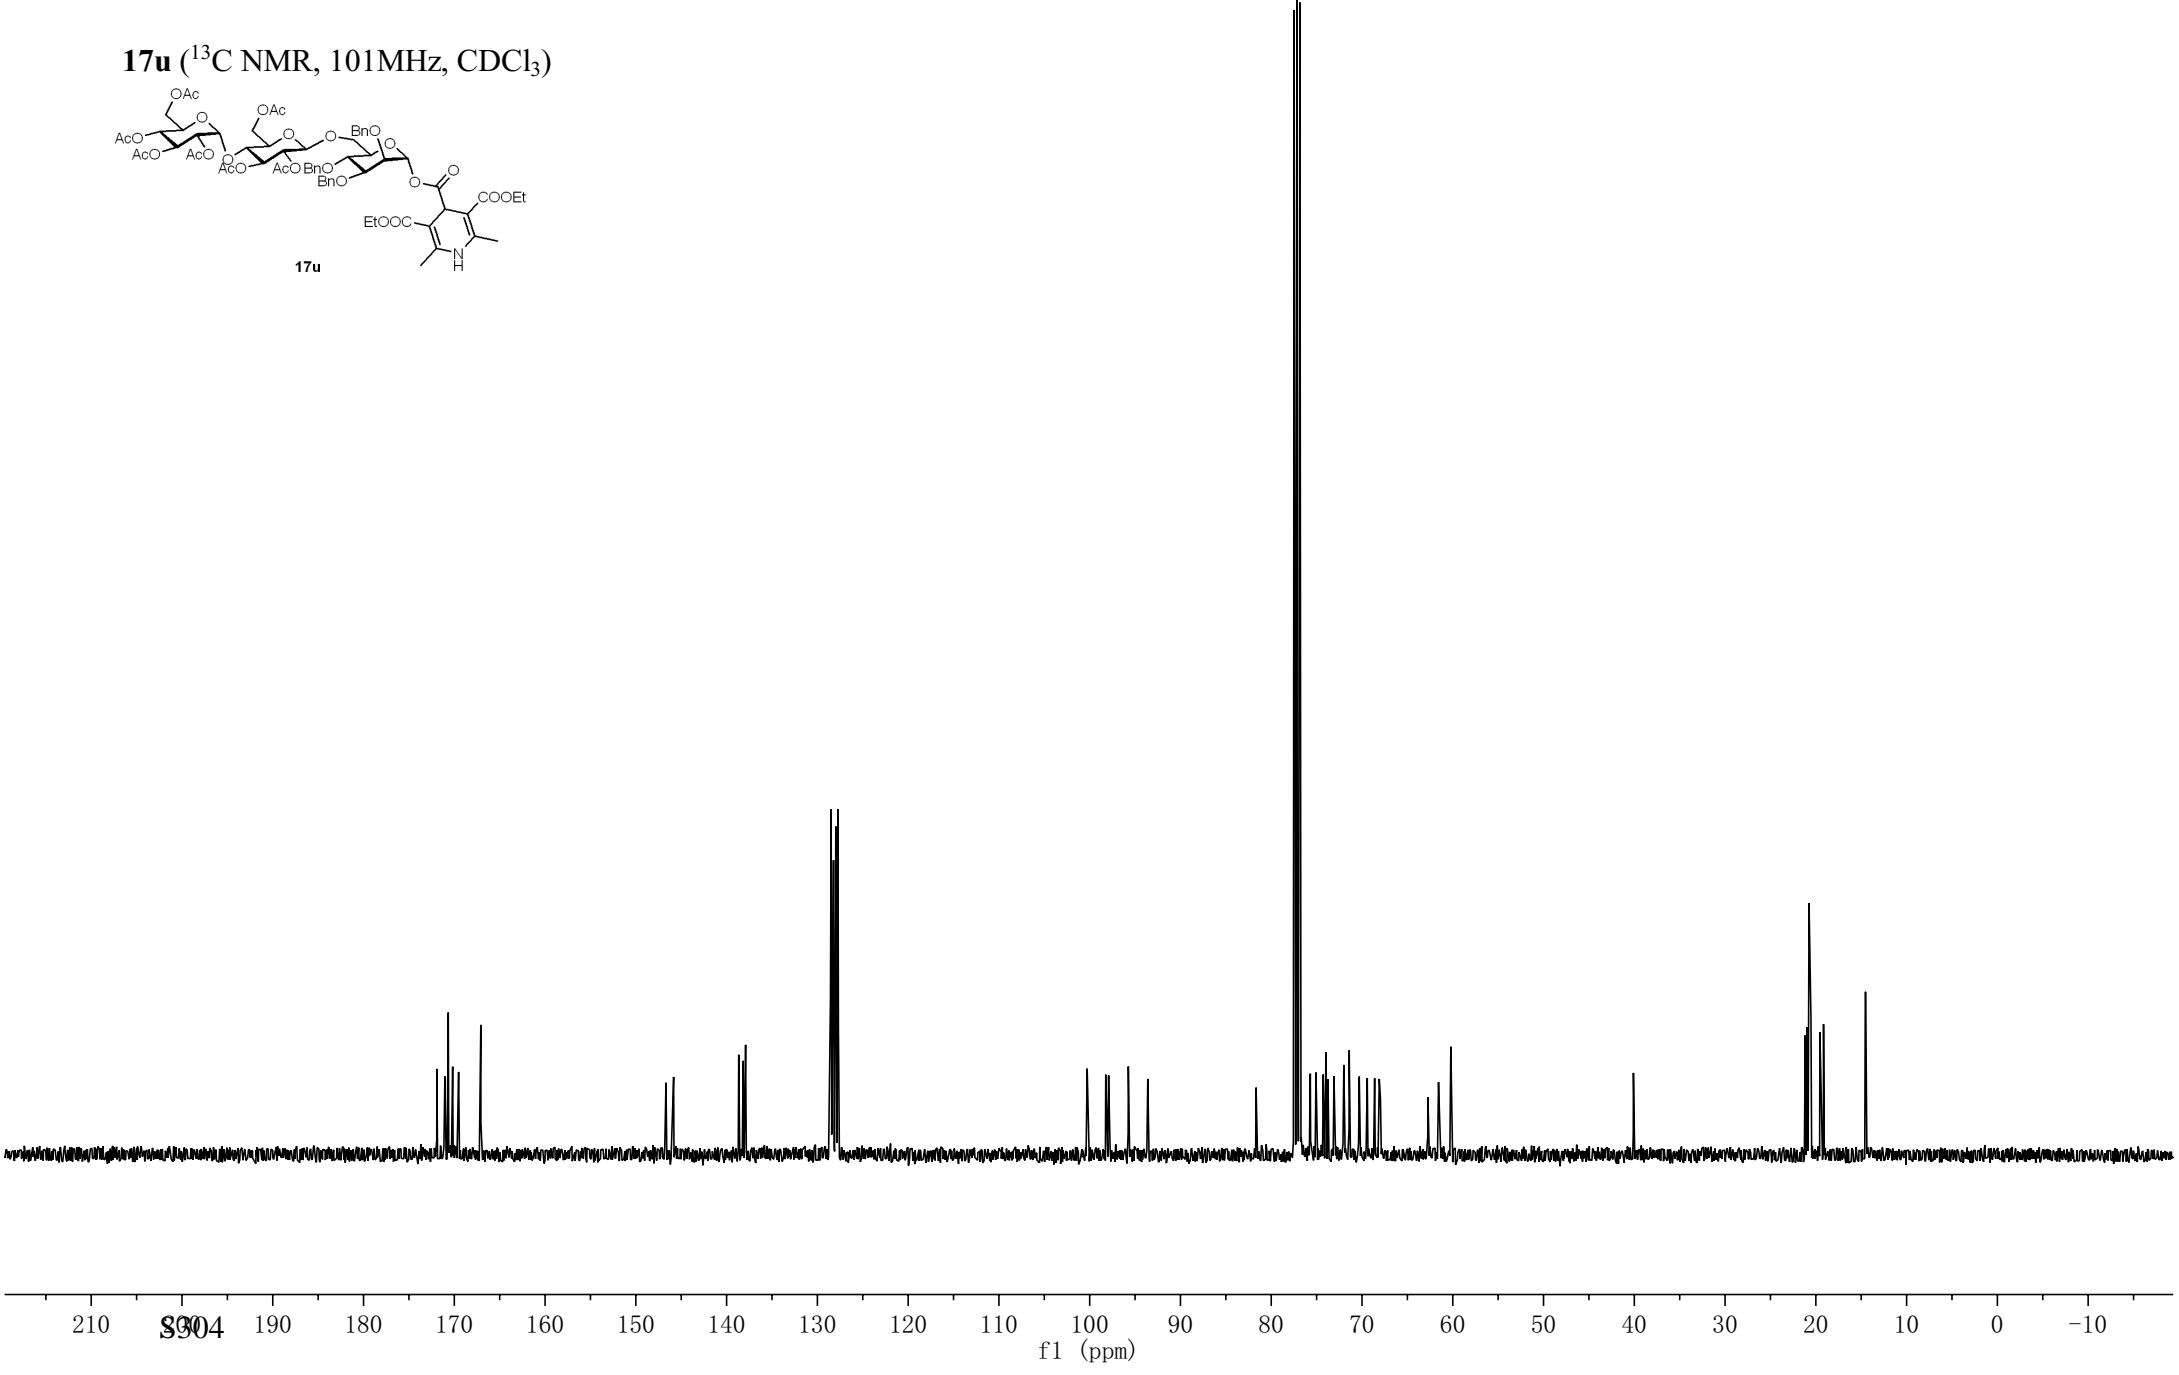

7.86  
7.86  
7.84  
7.84  
7.82  
7.81  
7.68  
7.67  
7.66  
7.65  
7.63  
7.63  
7.54  
7.50  
7.49  
7.49  
7.47  
7.47  
7.45  
7.40  
7.38  
7.36  
7.33  
7.31  
7.31  
7.18  
7.16  
5.97  
5.97  
5.51  
5.48  
5.33  
5.28  
5.23  
5.22  
5.22  
4.76  
4.75  
4.75  
4.74  
4.22  
4.02  
4.02  
4.00  
4.00  
3.78  
3.77  
3.76  
2.51  
2.51  
2.50  
2.50  
2.49  
2.31  
2.09  
2.00  
1.98  
1.93  
1.92  
1.89

**17wd** (<sup>1</sup>H NMR, 400MHz, DMSO-d<sub>6</sub>)

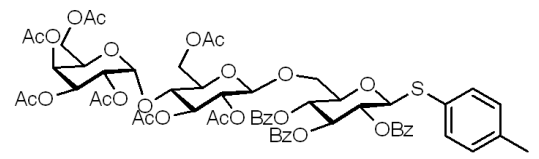

**17wd**

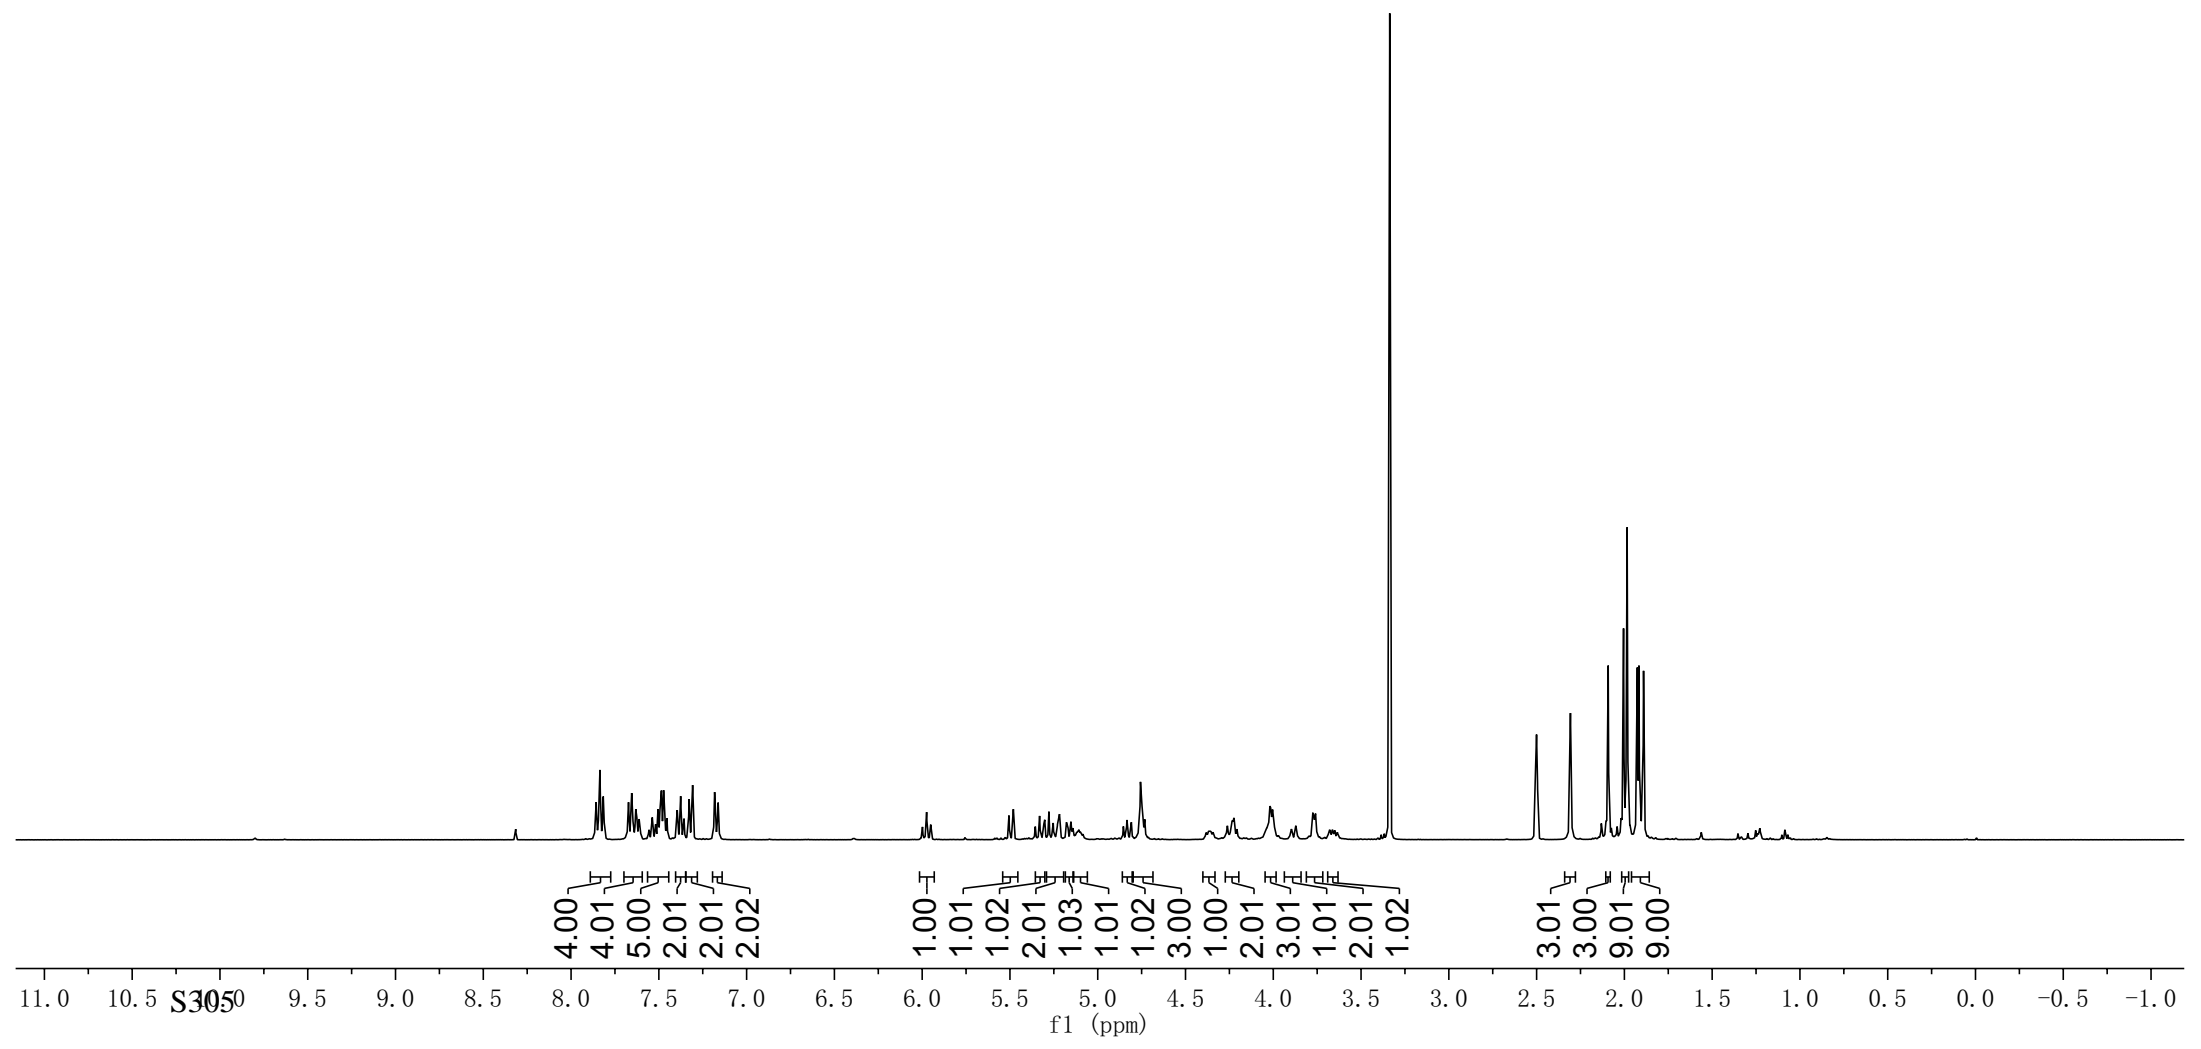

170.58  
170.36  
170.34  
169.97  
169.81  
169.67  
169.53  
165.51  
165.04  
164.94  
137.83  
134.34  
131.83  
130.27  
129.68  
129.44  
129.35  
129.30  
129.21  
129.08  
128.95  
128.87  
100.38  
99.65  
84.32  
74.69  
72.94  
72.14  
70.74  
70.12  
69.34  
-61.30  
40.61  
40.40  
40.19  
39.98  
39.77  
39.56  
39.35  
21.13  
20.92  
20.88  
20.82  
20.77  
20.74

**17wd** ( $^{13}\text{C}$  NMR, 101MHz,  $\text{DMSO-}d_6$ )

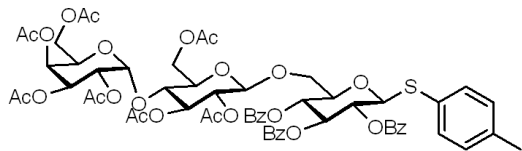

**17wd**

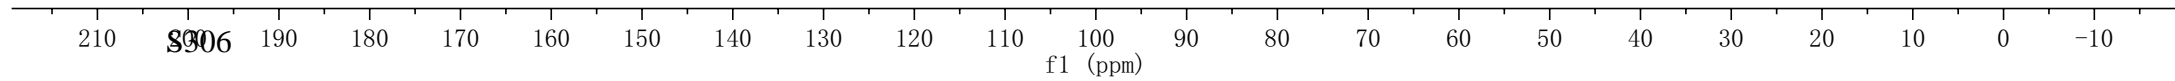



171.32  
171.08  
170.72  
170.70  
170.51  
139.49  
139.39  
139.36  
134.61  
133.03  
130.91  
130.39  
130.31  
130.09  
130.03  
129.58  
129.51  
129.49  
129.27  
129.21  
129.09  
128.80  
128.68  
128.62  
128.55  
128.47  
128.38  
118.26  
101.47  
101.43  
87.03  
77.07  
74.63  
73.66  
73.41  
73.09  
72.86  
72.05  
72.02  
71.64  
71.44  
70.06  
69.93  
68.06  
61.96  
21.15  
21.10  
21.06  
21.02  
20.89  
20.83  
20.69  
1.88  
1.67  
1.47  
1.26  
1.05  
0.85  
0.64

**19a** ( $^{13}\text{C}$  NMR, 101MHz,  $\text{CD}_3\text{CN}$ )

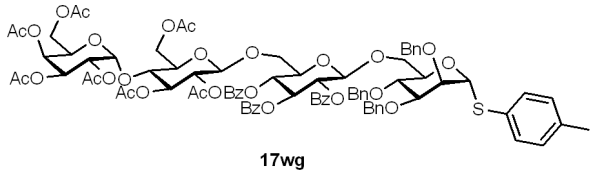

20 210 190 180 170 160 150 140 130 120 110 100 90 80 70 60 50 40 30 20 10 0 -10

f1 (ppm)

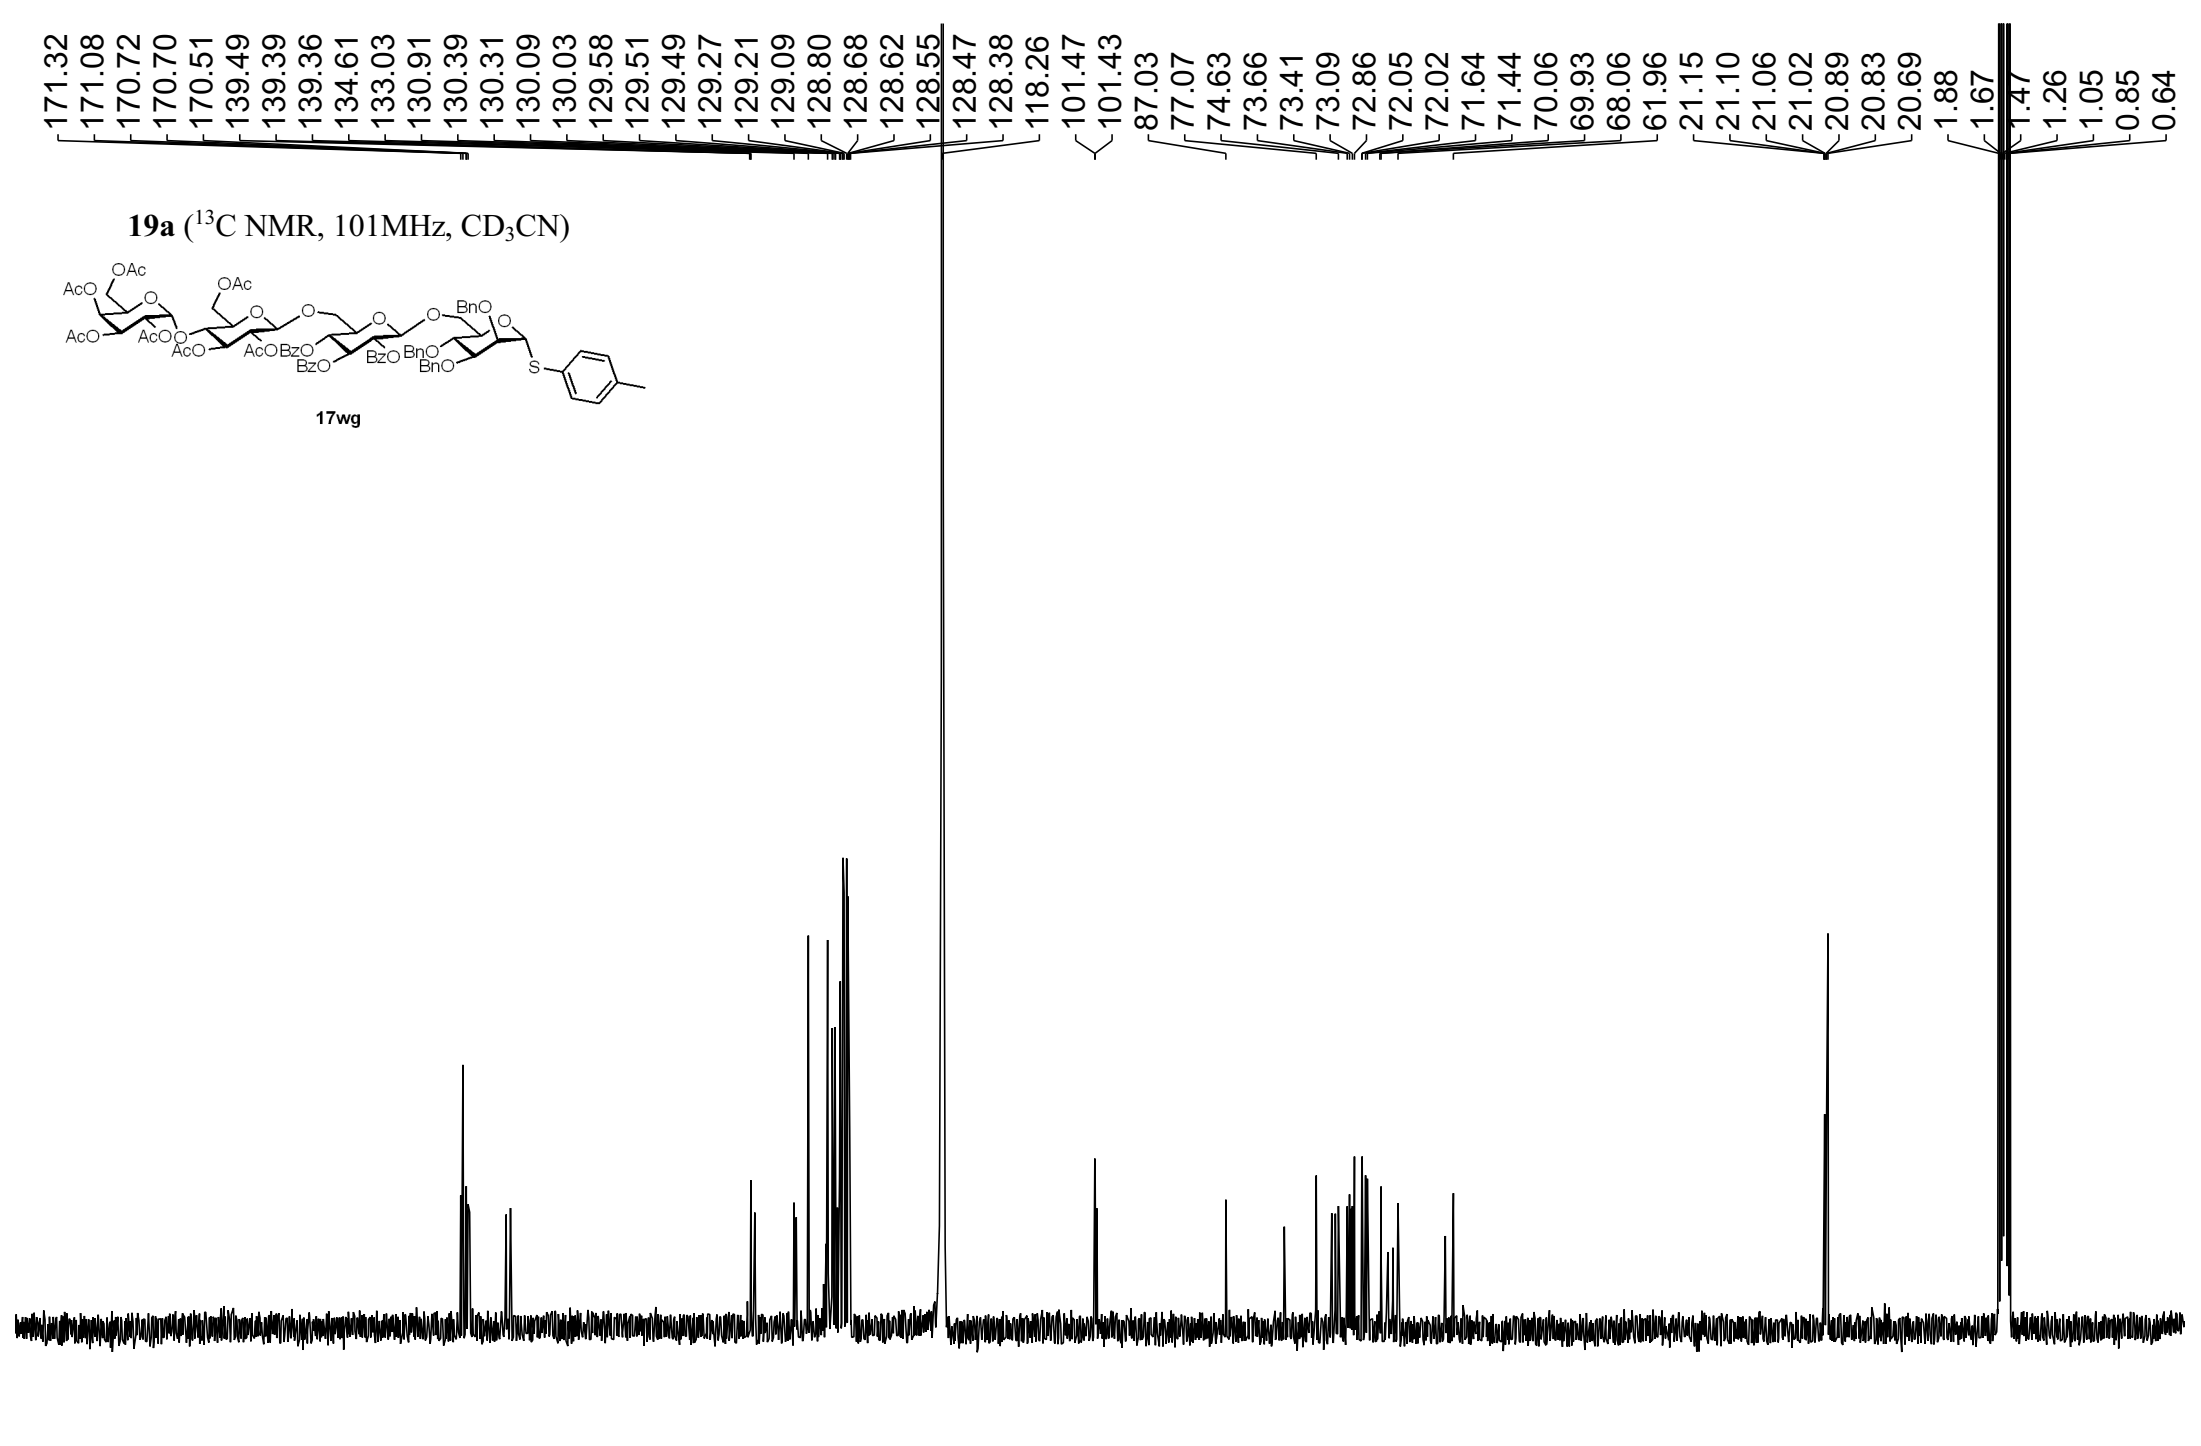

7.86  
7.84  
7.83  
7.82  
7.82  
7.81  
7.80  
7.80  
7.79  
7.79  
7.48  
7.48  
7.39  
7.33  
7.32  
7.31  
7.31  
7.31  
7.29  
7.29  
7.28  
7.28  
7.27  
7.27  
7.26  
7.25  
7.25  
7.24  
7.24  
7.20  
7.20  
7.19  
7.18  
7.18  
5.46  
5.26  
5.09  
4.92  
4.32  
4.29  
4.29  
2.63  
2.16  
2.12  
2.07  
2.06  
2.05  
2.03  
2.03  
2.02  
1.95  
1.36  
1.35  
1.33  
1.33  
1.31  
1.30  
1.28  
1.28  
1.25

**17w** (<sup>1</sup>H NMR, 400MHz, CDCl<sub>3</sub>)

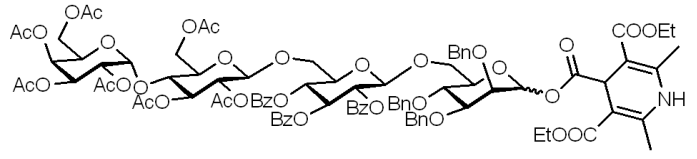

**17w, major α**

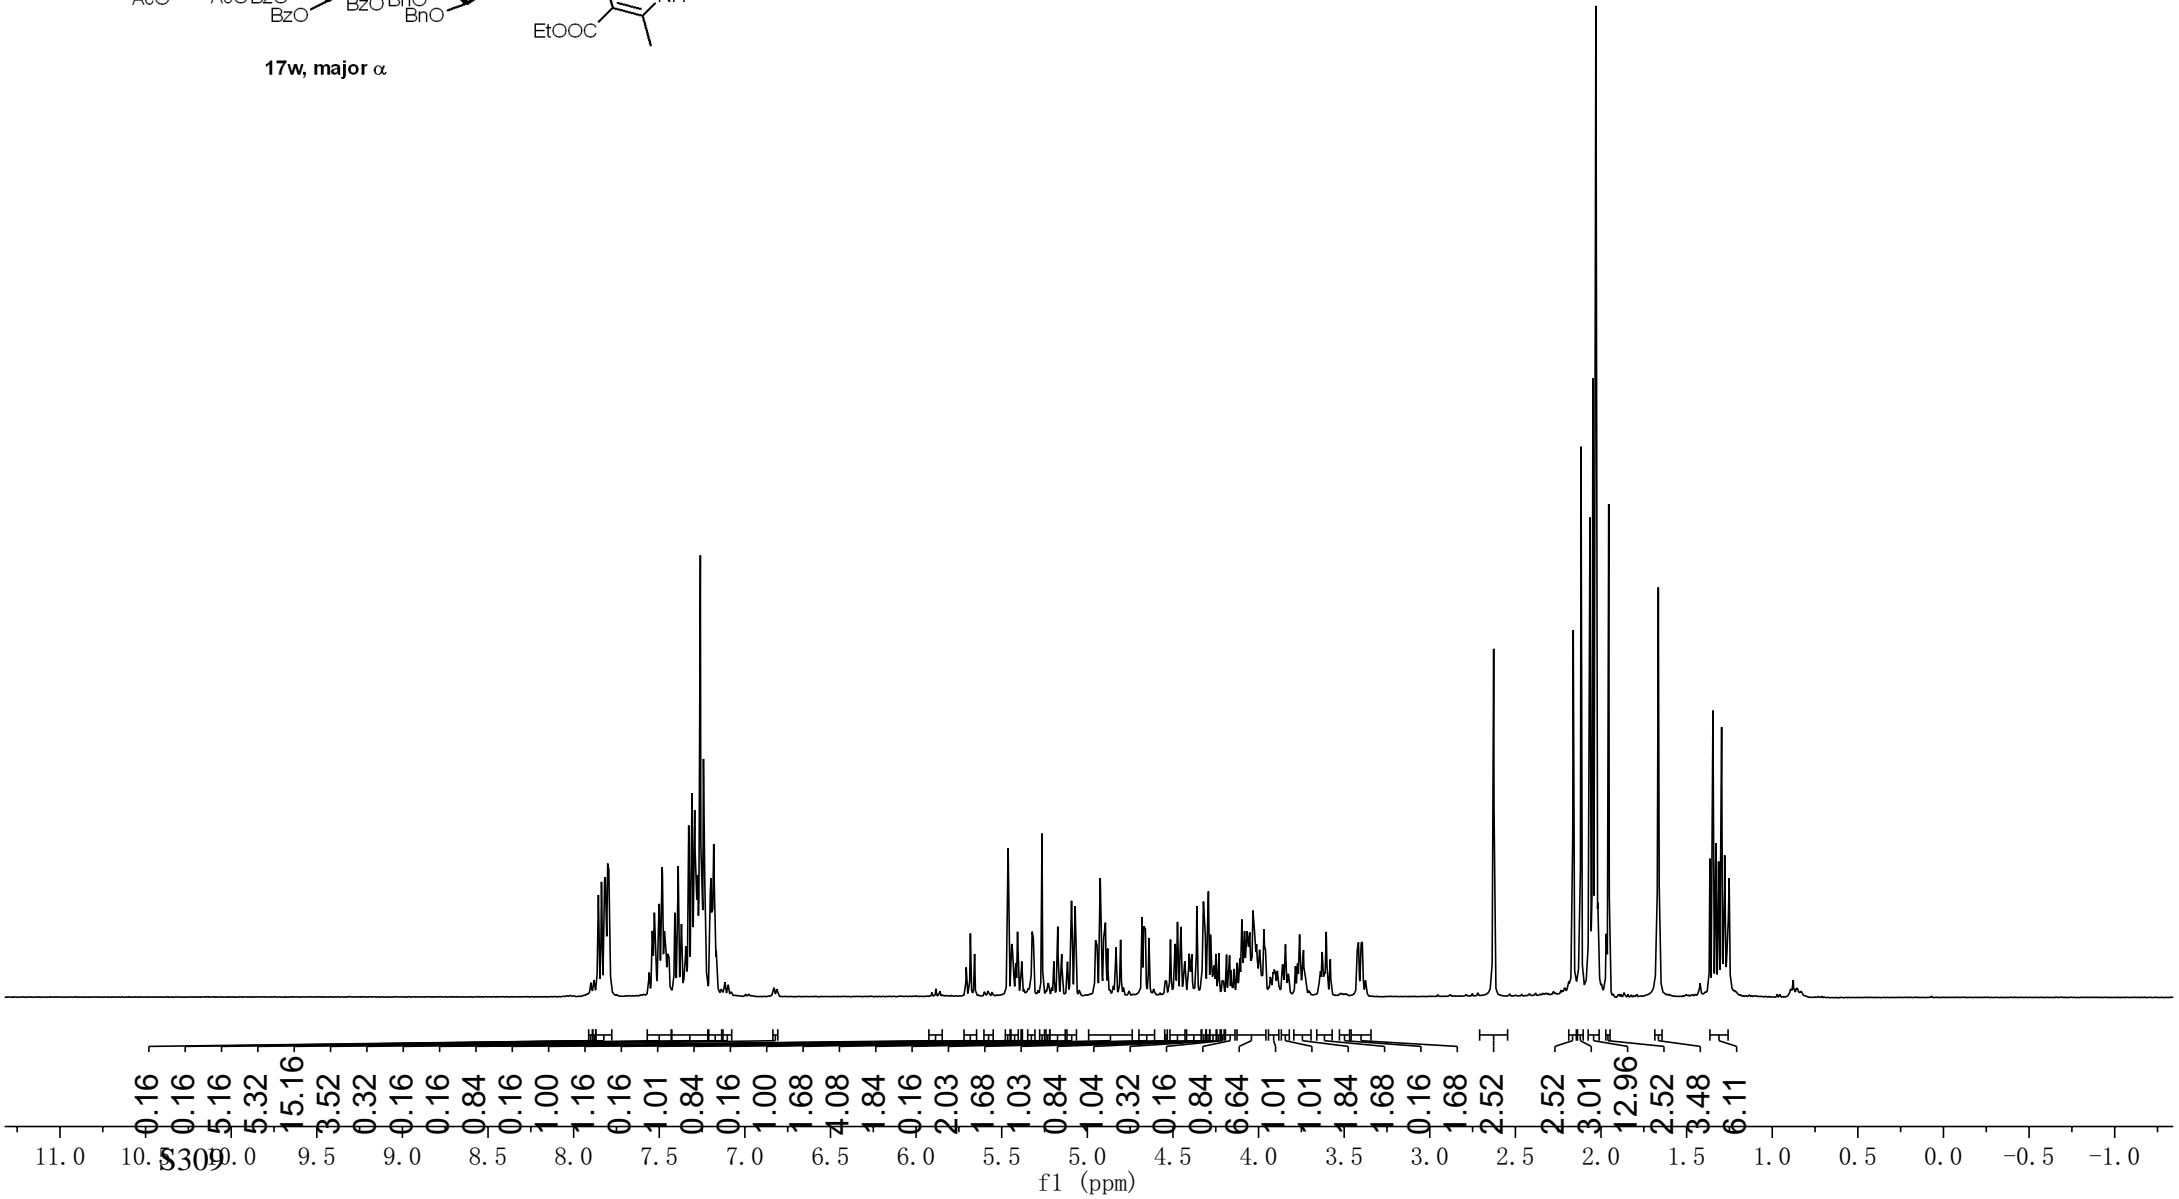



172.11  
170.57  
170.50  
170.31  
170.21  
170.14  
169.74  
169.24  
167.29  
167.27  
166.99  
165.11  
146.98  
138.57  
138.14  
137.93  
133.77  
129.99  
129.83  
129.78  
128.86  
128.79  
128.69  
128.62  
128.51  
128.44  
128.39  
128.33  
128.03  
127.83  
127.73  
127.67  
101.21  
97.75  
77.48  
77.16  
76.84  
76.43  
75.27  
74.04  
72.87  
72.70  
71.41  
71.11  
70.76  
69.17  
66.72  
60.92  
60.53  
60.29  
20.96  
20.92  
20.78  
20.75  
20.65  
19.73  
18.76  
14.65  
14.63

**17w** (<sup>13</sup>C NMR, 101MHz, CDCl<sub>3</sub>)

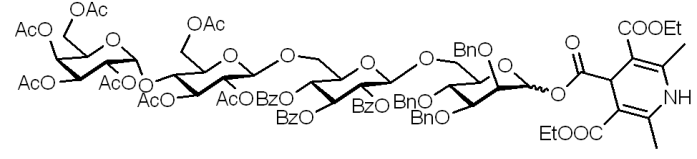

**17w, major  $\alpha$**

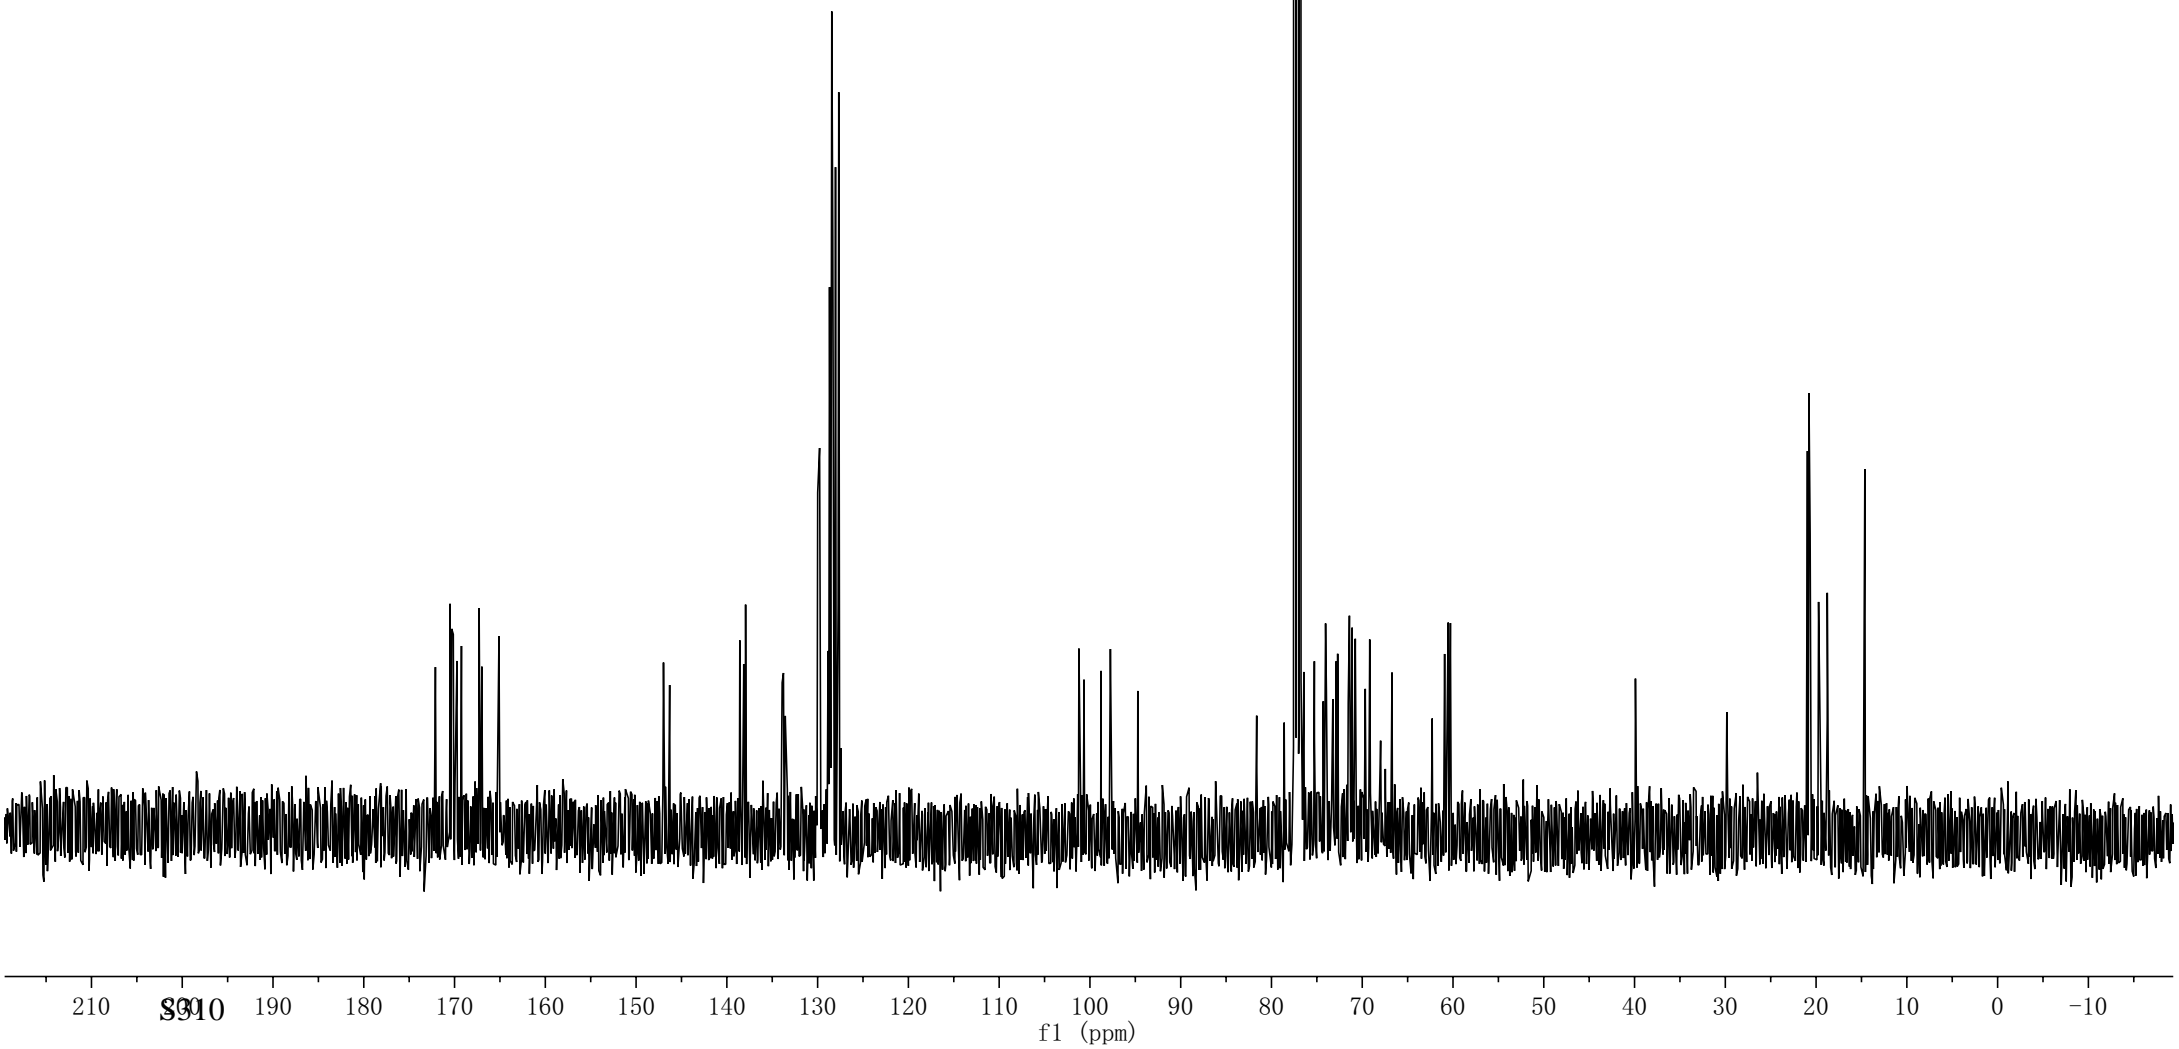

8.11  
8.10  
7.97  
7.96  
7.50  
7.50  
7.49  
7.48  
7.48  
7.32  
7.31  
7.31  
7.30  
7.29  
7.29  
7.28  
7.28  
7.27  
7.26  
7.25  
7.23  
6.98  
6.96  
6.09  
5.62  
4.97  
4.94  
4.91  
4.90  
4.71  
4.68  
4.62  
4.62  
4.59  
4.59  
4.55  
4.52  
4.14  
4.12  
4.10  
4.08  
4.07  
4.02  
3.97  
3.96  
3.91  
3.89  
3.64  
2.67  
2.24  
2.21  
1.23  
1.21  
1.19  
1.19  
1.17  
1.15  
1.11  
1.09

17x (<sup>1</sup>H NMR, 400MHz, CDCl<sub>3</sub>)

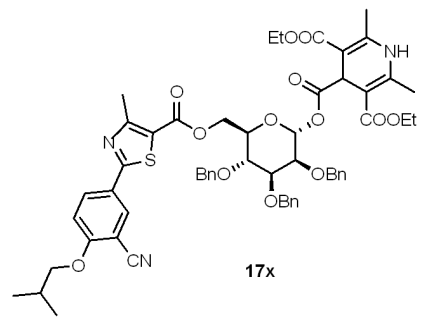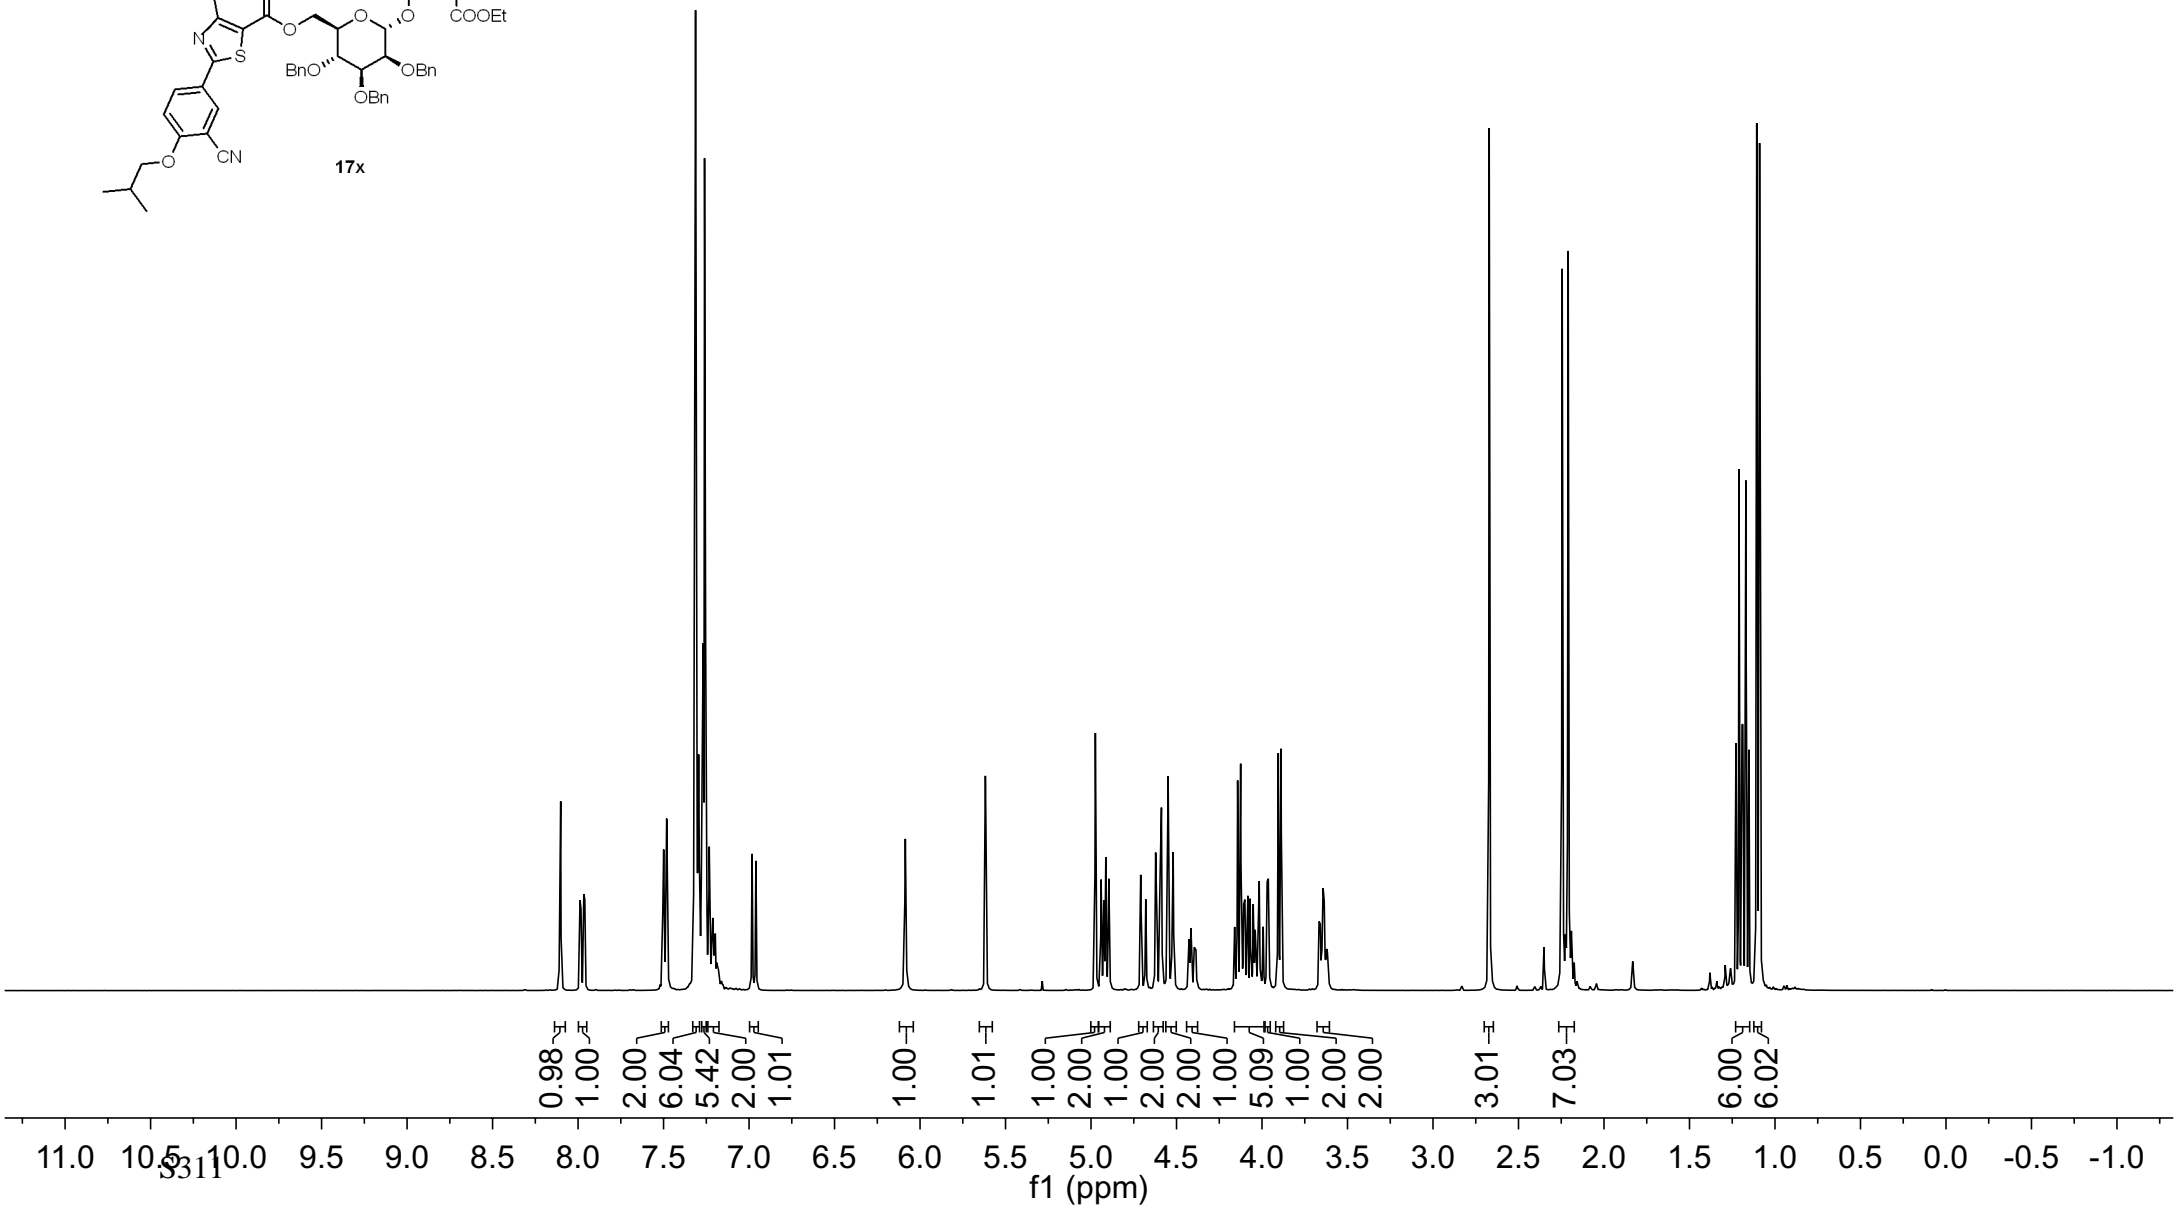

172.14  
167.46  
166.98  
166.91  
162.52  
161.72  
161.39  
146.19  
146.13  
138.94  
137.89  
137.87  
132.83  
132.10  
128.53  
128.47  
128.33  
128.29  
128.24  
127.92  
127.89  
127.80  
127.72  
127.49  
126.02  
121.90  
115.52  
112.61  
102.87  
98.15  
98.08  
93.99  
81.72  
77.47  
77.16  
76.84  
75.71  
75.11  
74.28  
74.06  
74.02  
73.35  
71.63  
63.70  
60.21  
60.18  
40.81  
28.23  
19.38  
19.31  
19.14  
17.64  
14.46  
14.36

17x (<sup>13</sup>C NMR, 101MHz, CDCl<sub>3</sub>)

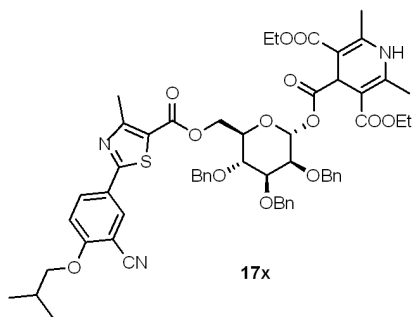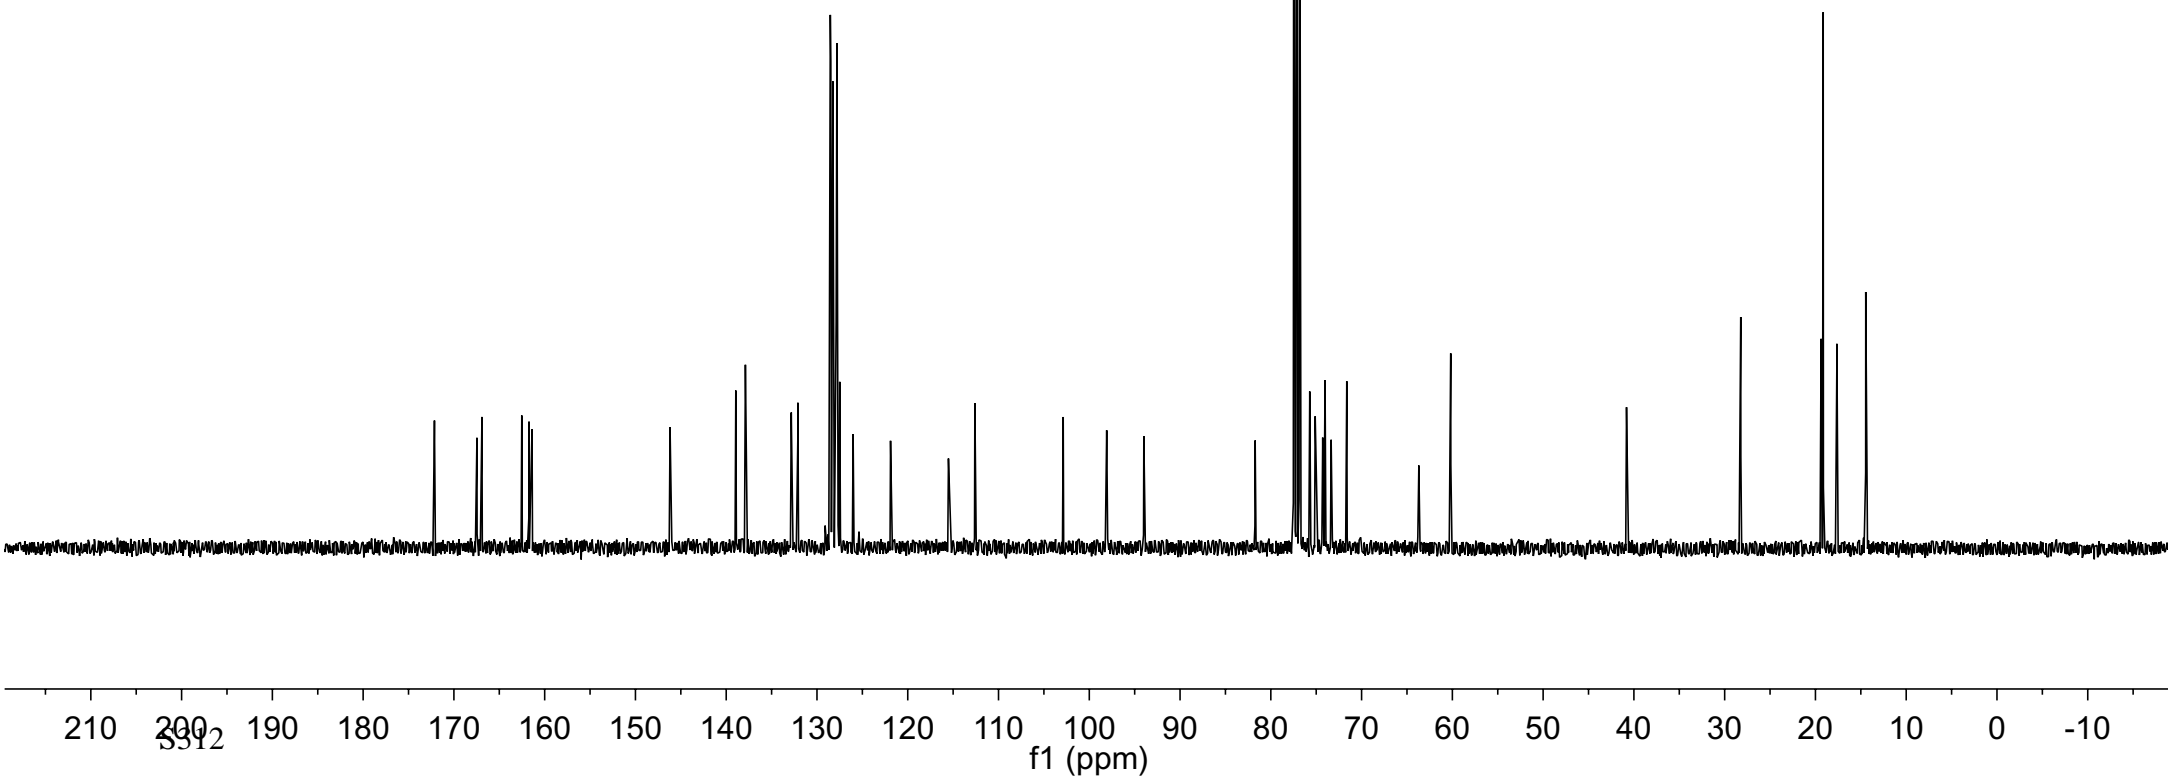

8.07  
8.06  
7.50  
7.49  
7.47  
7.47  
7.45  
7.36  
7.34  
7.34  
7.32  
7.30  
7.30  
7.29  
7.28  
7.28  
7.27  
7.27  
7.27  
7.26  
7.26  
7.25  
7.25  
7.20  
7.19  
7.18  
7.00  
6.98  
6.44  
5.59  
5.59  
5.13  
5.03  
4.89  
4.81  
4.78  
4.66  
4.49  
4.46  
4.42  
4.40  
4.19  
4.19  
4.17  
4.17  
4.13  
3.94  
3.94  
3.83  
3.60  
3.60  
2.31  
2.28  
1.28  
1.26  
1.25  
1.24  
1.23  
1.21

17y (<sup>1</sup>H NMR, 400MHz, CDCl<sub>3</sub>)

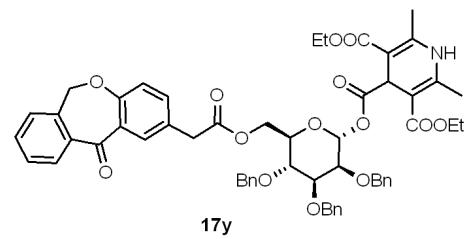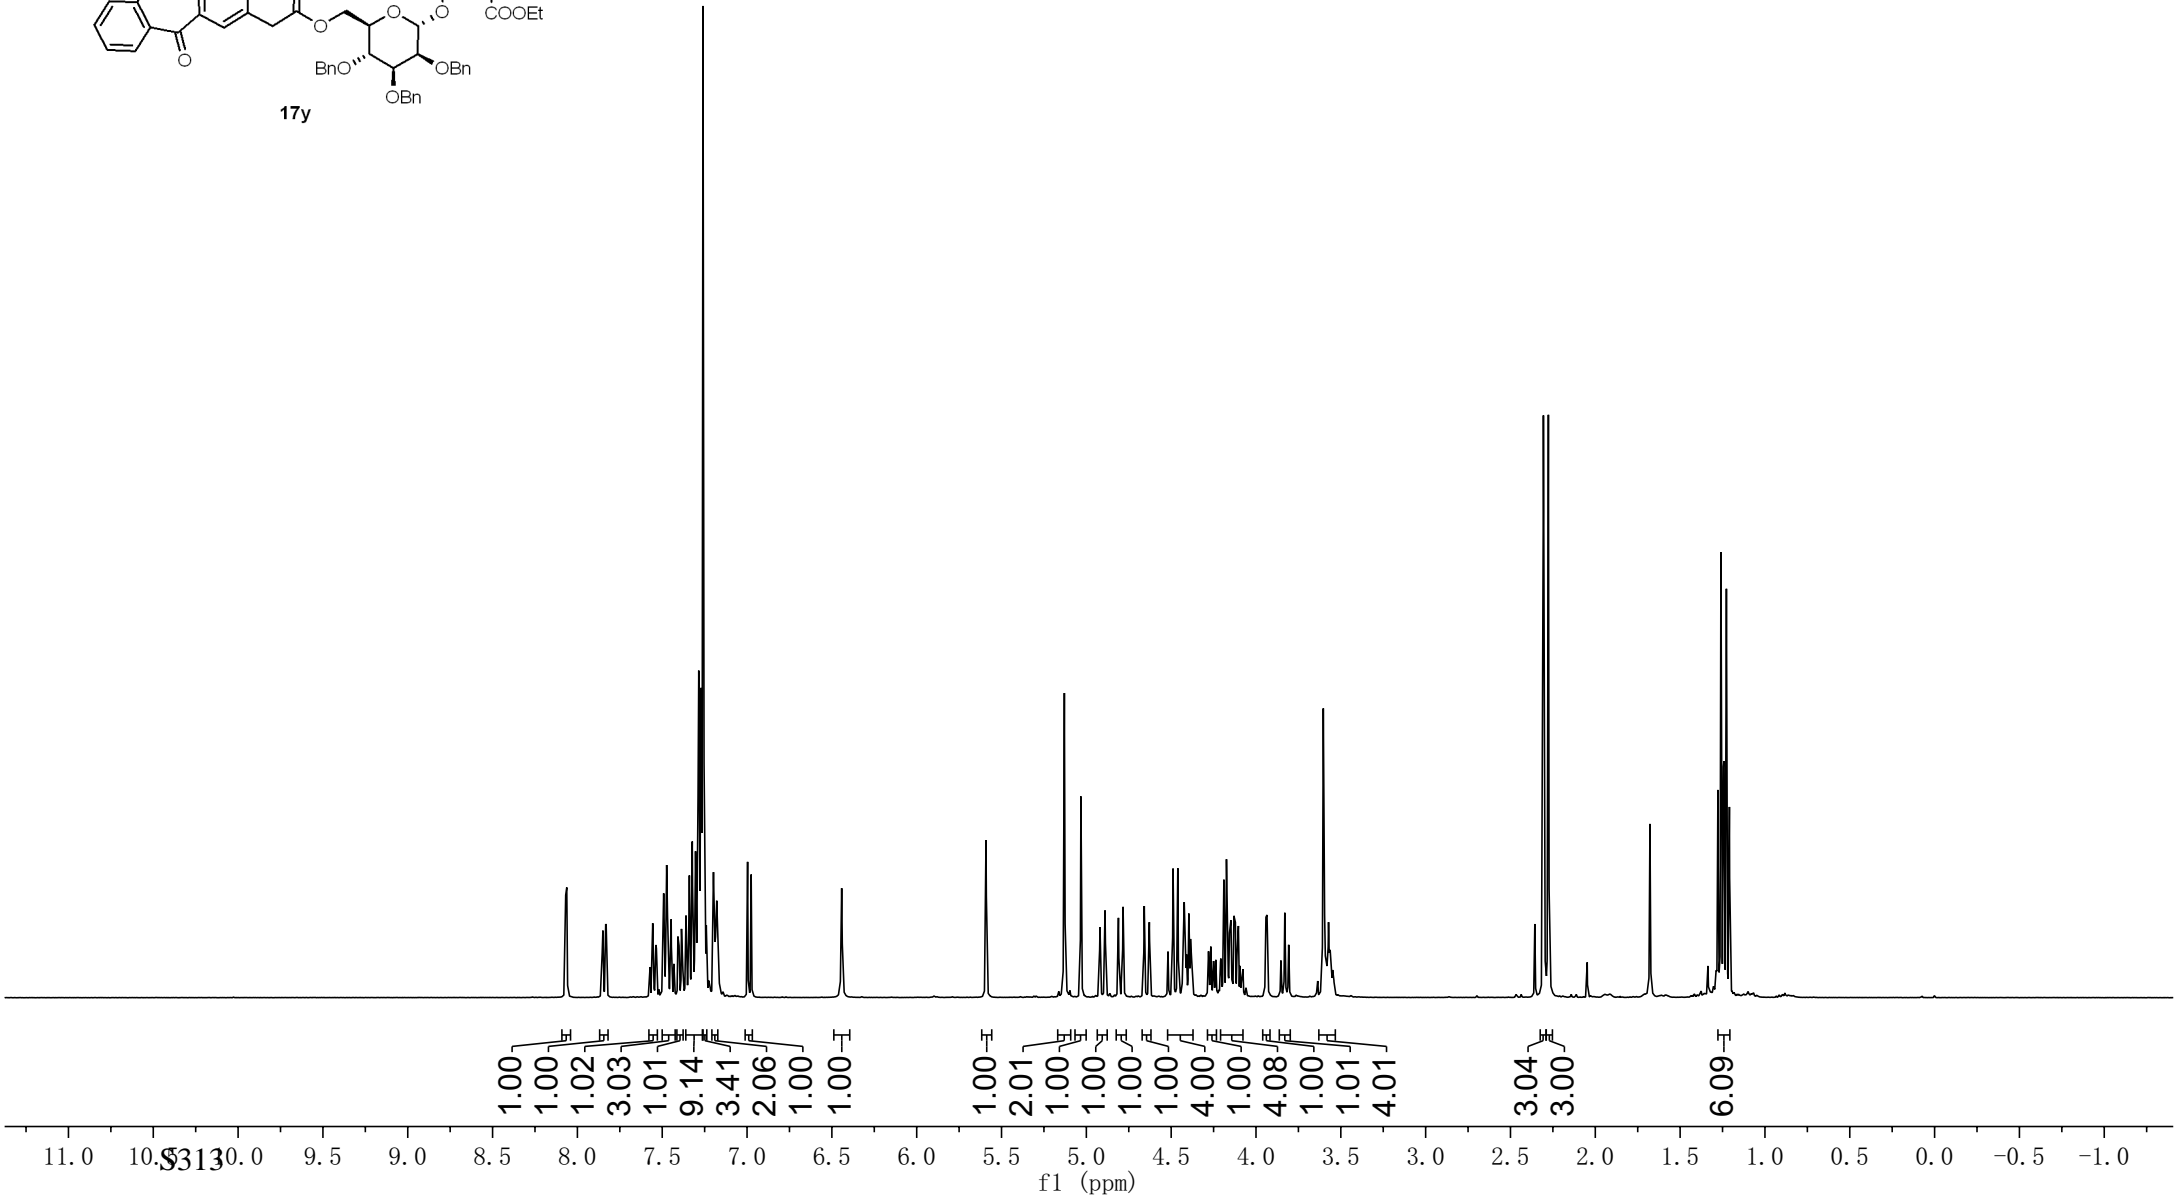

17y (<sup>13</sup>C NMR, 101MHz, CDCl<sub>3</sub>)

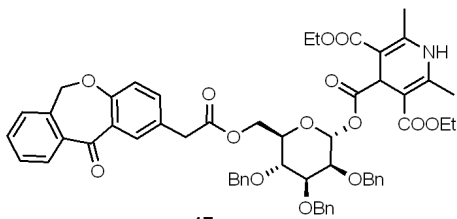

191.11  
172.01  
171.22  
167.11  
167.08  
160.67

146.40  
140.43  
138.90  
138.05  
137.99  
136.95  
135.74  
132.96  
132.48  
129.61  
129.39  
128.53  
128.51  
128.34  
128.21  
127.98  
127.95  
127.92  
127.60  
127.71  
127.62  
121.33  
98.30  
93.95  
81.43  
77.48  
77.16  
76.84  
75.07  
74.30  
73.99  
73.94  
73.88  
73.72  
71.51  
60.30  
60.26  
40.65  
40.04  
19.43  
19.40  
14.53  
14.17

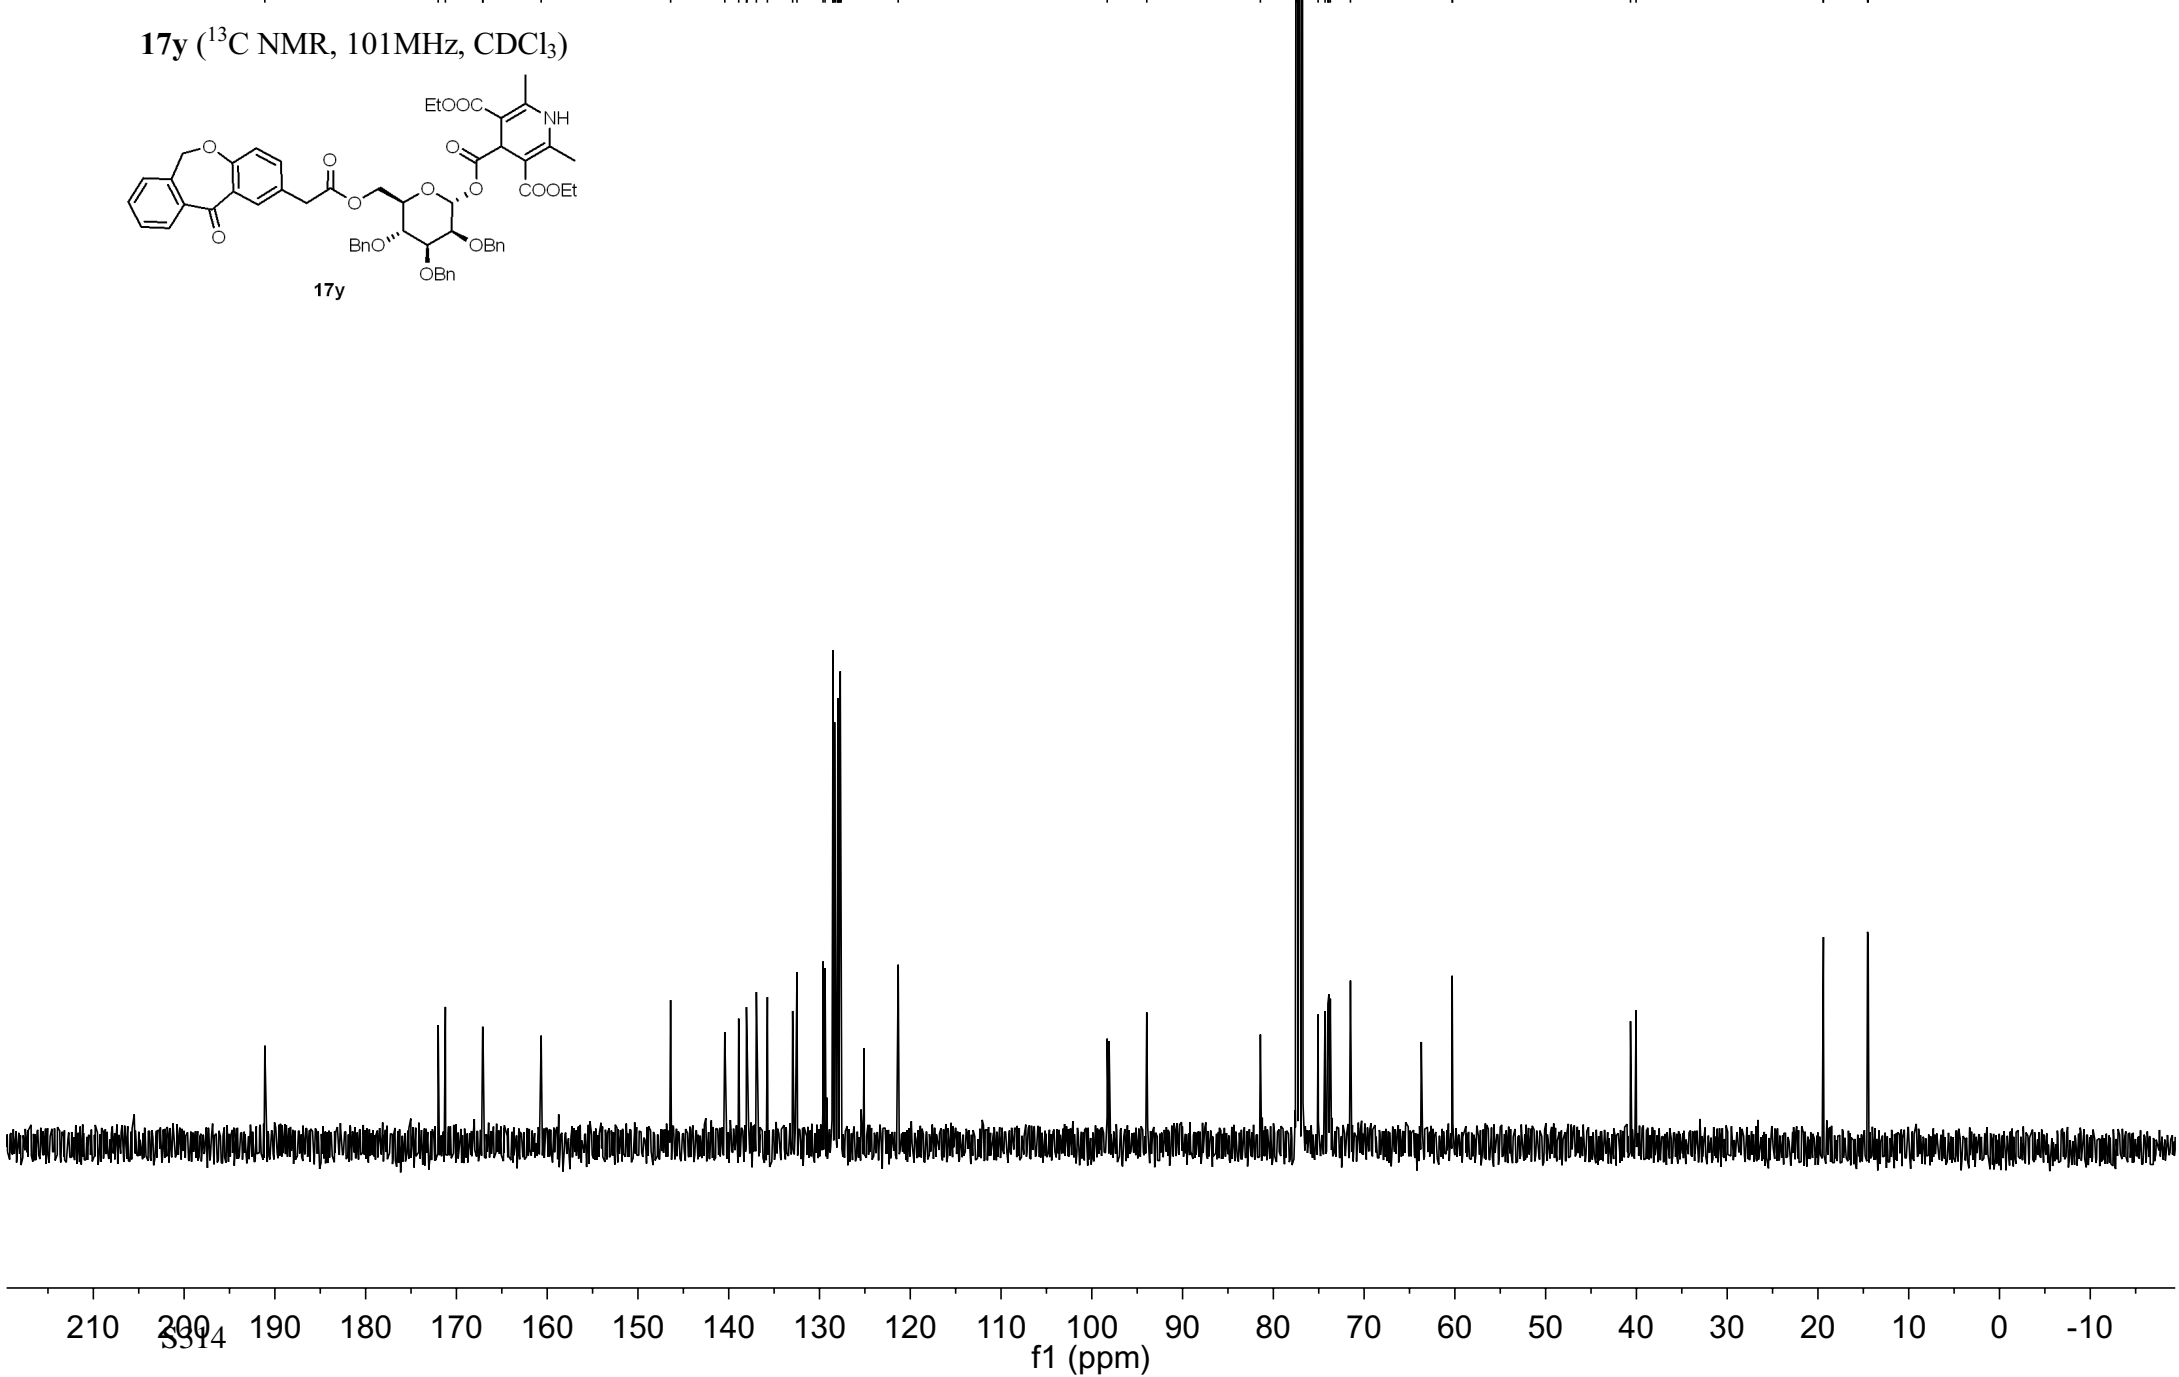

7.62 7.62 7.60 7.60 7.58 7.57 7.56 7.55 7.49 7.48 7.46 7.46 7.36 7.35 7.34 7.34 7.33 7.33 7.32 7.32 7.31 7.31 7.31 7.30 7.30 7.29 7.29 7.28 7.28 7.26 7.26 7.24 7.24 7.24 6.81 5.60 5.60 5.02 4.89 4.89 4.86 4.68 4.56 4.53 4.50 4.47 4.18 4.17 3.14 3.14 3.12 2.87 2.24 2.23 1.28 1.26 1.24 1.22 1.21

17z (<sup>1</sup>H NMR, 400MHz, CDCl<sub>3</sub>)

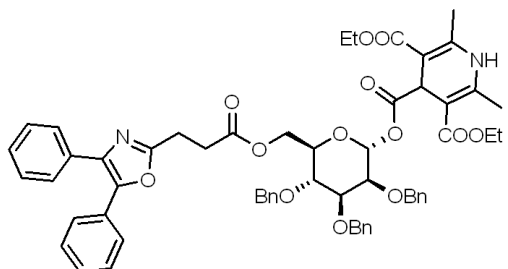

17z

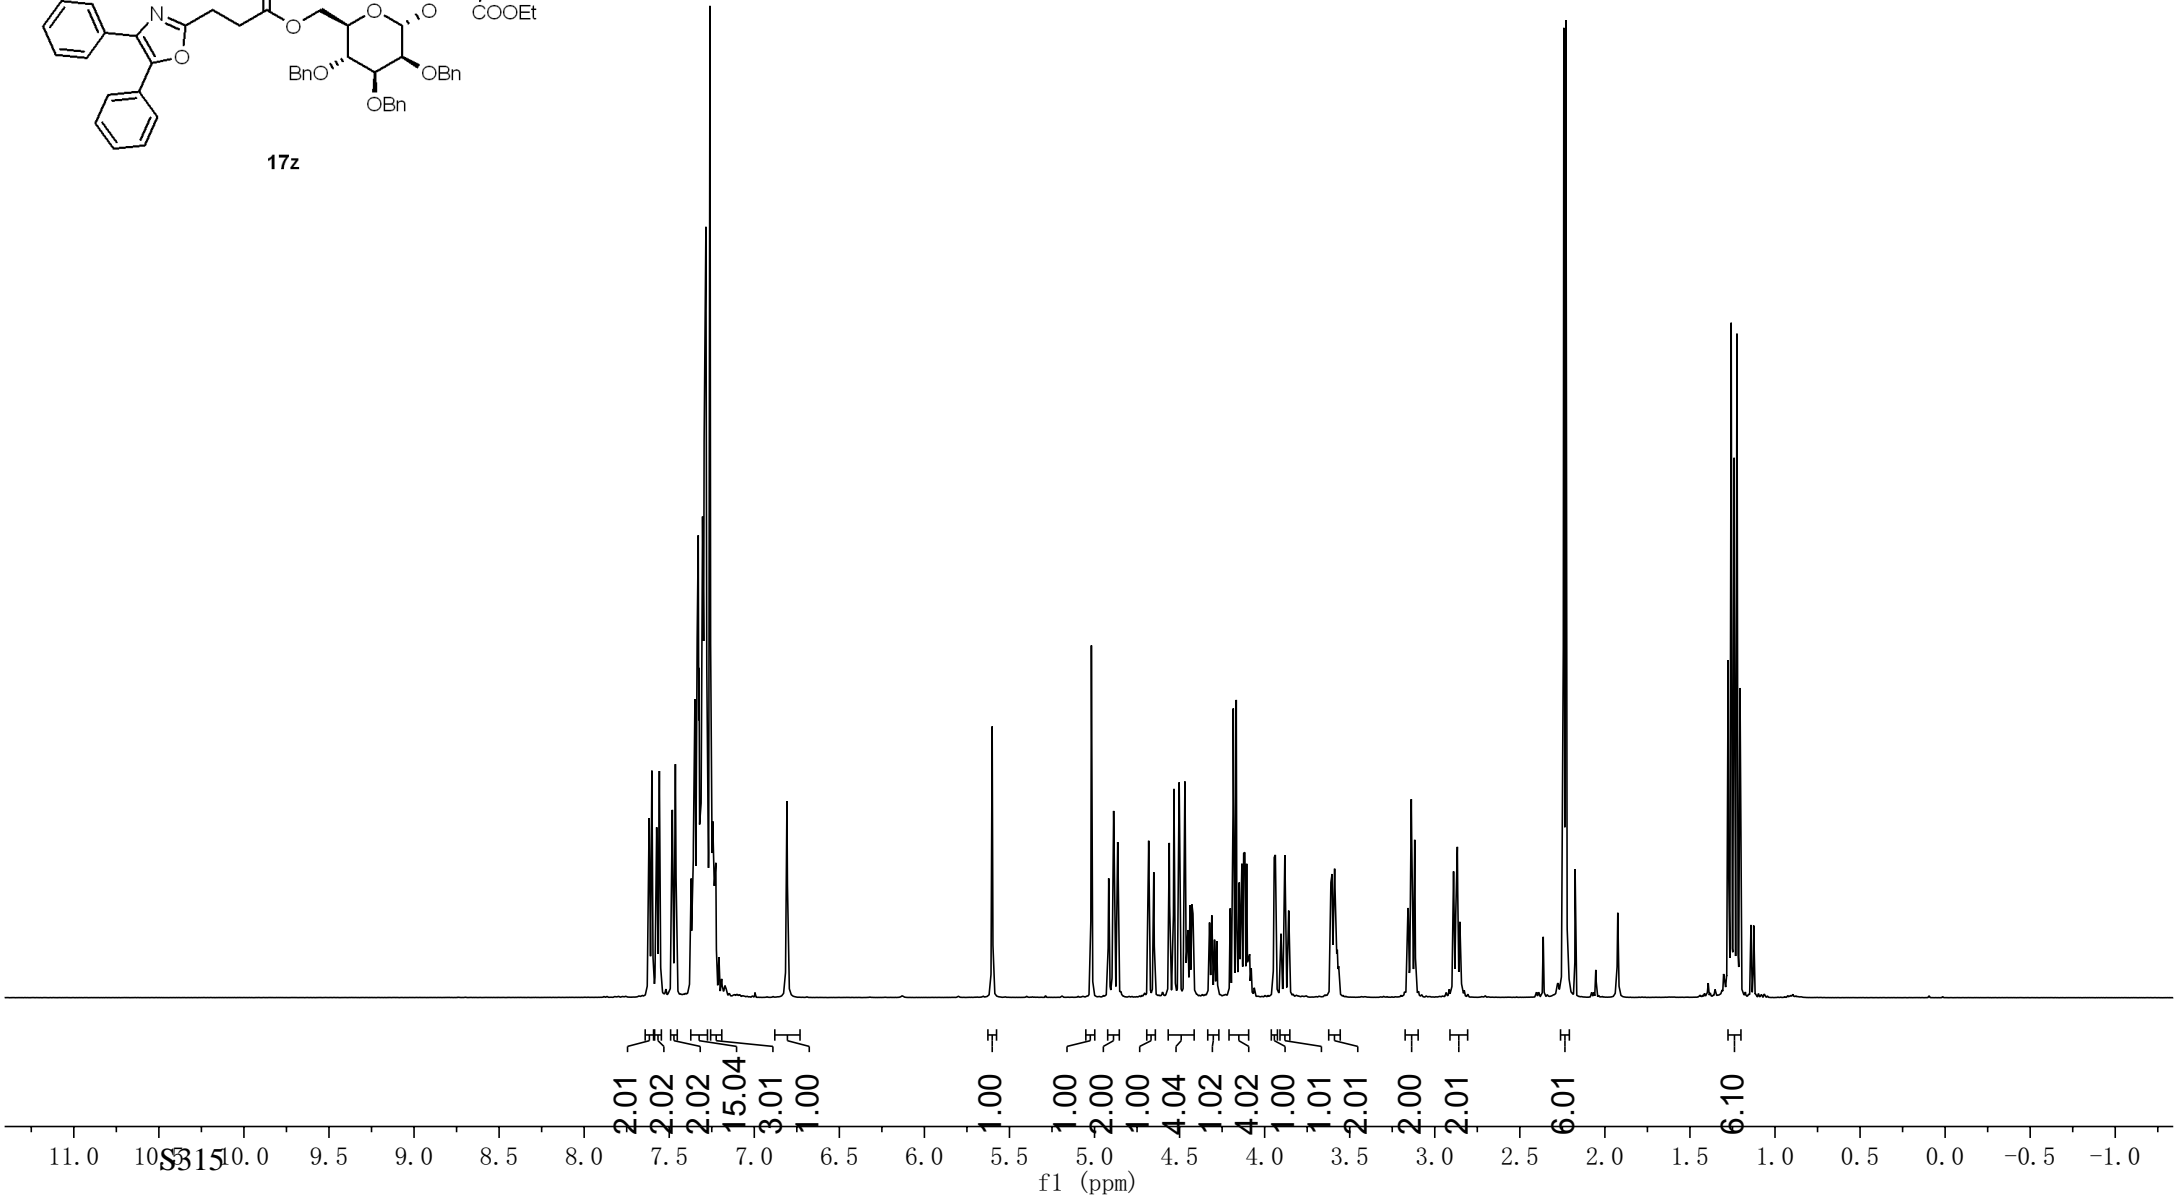

17z (<sup>13</sup>C NMR, 101MHz, CDCl<sub>3</sub>)

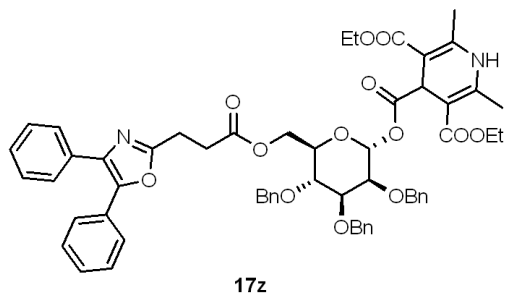

171.99  
171.57  
167.06  
167.00  
161.93  
146.60  
146.50  
145.59  
138.76  
137.97  
135.04  
132.37  
128.87  
128.75  
128.69  
128.60  
128.50  
128.48  
128.26  
128.24  
127.99  
127.92  
127.78  
127.71  
127.53  
126.53  
98.07  
97.83  
93.77  
81.40  
77.48  
77.16  
76.84  
75.07  
74.12  
73.94  
73.69  
73.66  
71.50  
63.38  
60.23  
60.18  
40.52  
31.20  
23.62  
19.20  
19.14  
14.49  
14.42

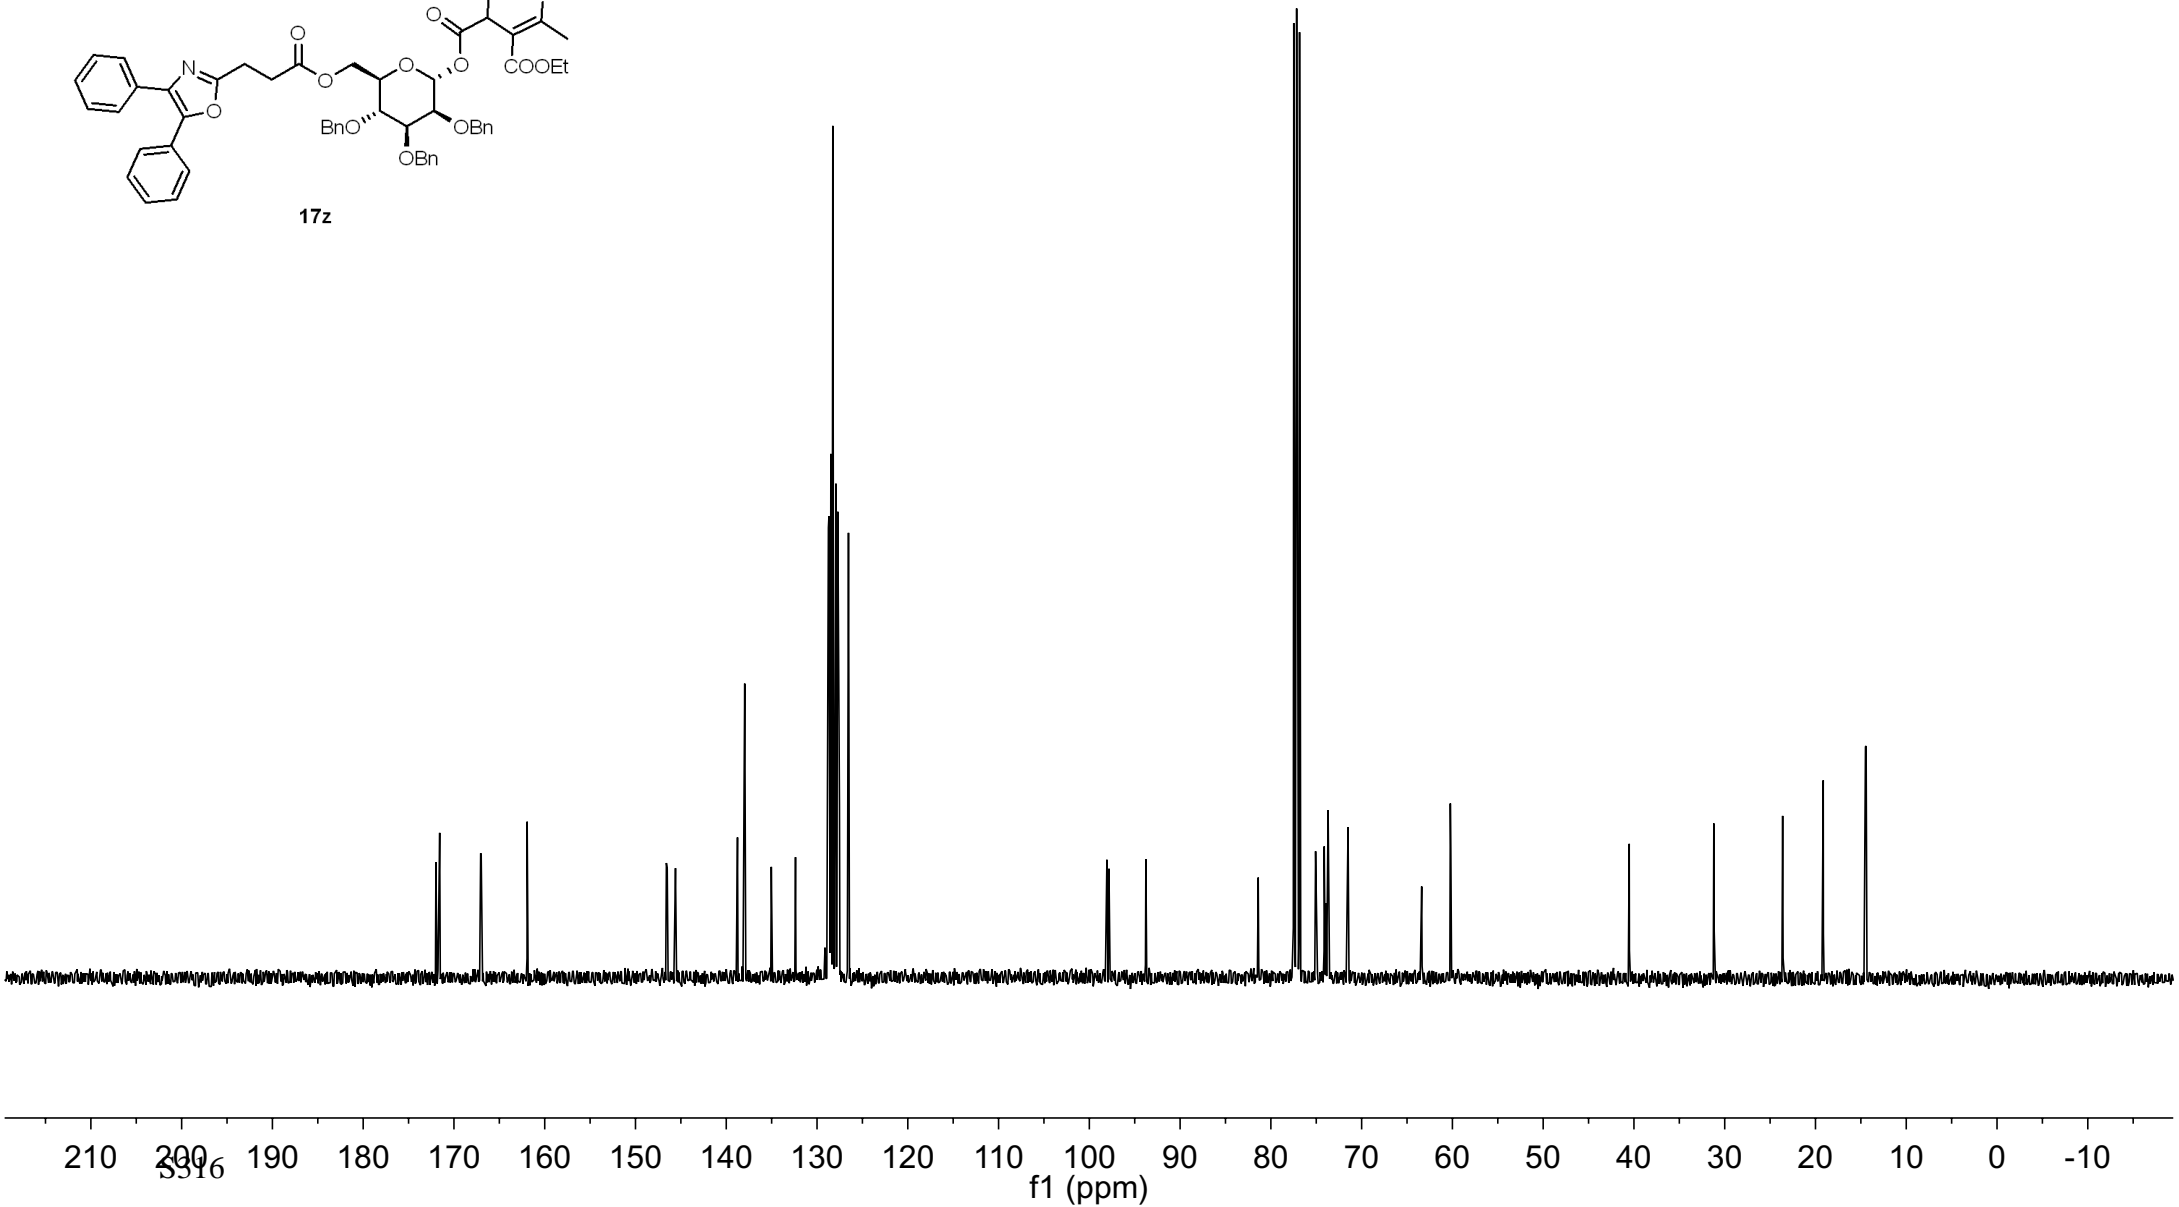

8.54  
8.53  
8.01  
8.01  
7.80  
7.78  
7.77  
7.64  
7.58  
7.58  
7.57  
7.56  
7.56  
7.36  
7.36  
7.35  
7.35  
7.34  
7.33  
7.33  
7.32  
7.31  
7.30  
7.30  
7.29  
7.28  
7.26  
7.03  
7.01  
6.24  
5.71  
4.99  
4.98  
4.77  
4.67  
4.64  
4.63  
4.60  
4.18  
4.16  
4.04  
3.93  
3.92  
2.24  
2.23  
2.23  
2.18  
2.17  
2.15  
1.85  
1.84  
1.84  
1.24  
1.22  
1.21  
1.15  
1.13  
1.12  
1.11

**17aa** (<sup>1</sup>H NMR, 400MHz, CDCl<sub>3</sub>)

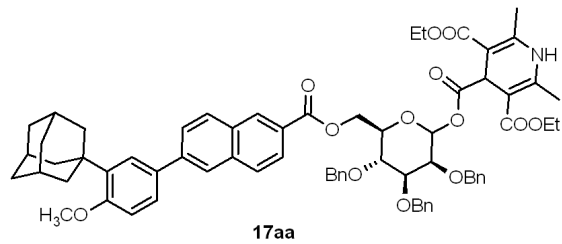

**17aa**

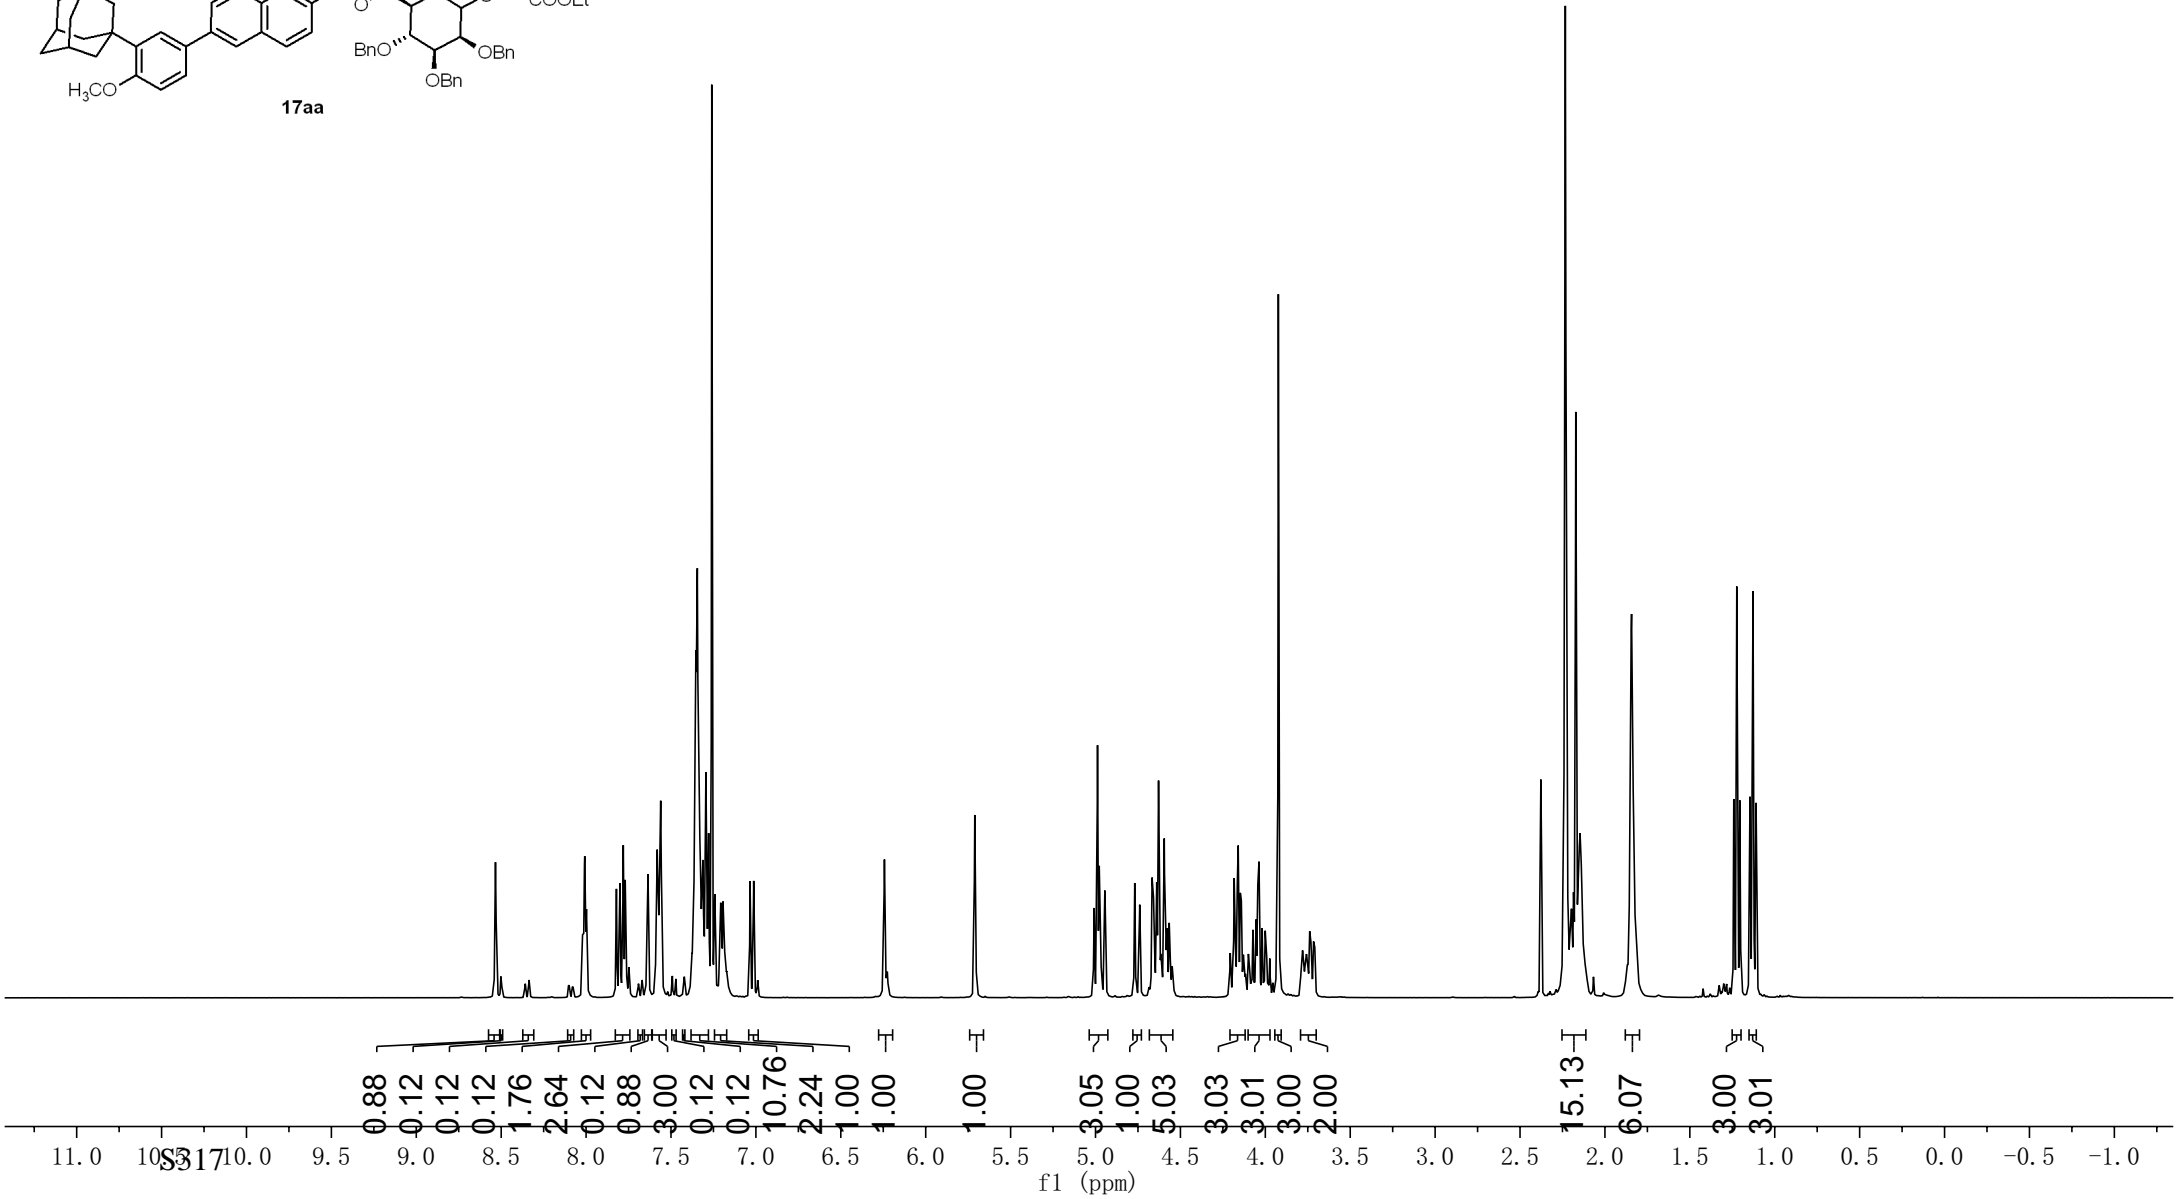



172.31  
 167.03  
 166.94  
 166.60  
 159.01  
 146.14  
 146.01  
 141.44  
 139.09  
 138.02  
 137.92  
 136.03  
 132.71  
 131.24  
 131.17  
 130.02  
 128.55  
 128.52  
 128.42  
 128.39  
 128.36  
 128.24  
 127.96  
 127.88  
 127.82  
 127.81  
 127.52  
 126.82  
 126.45  
 126.09  
 125.86  
 125.80  
 124.75  
 112.21  
 98.25  
 98.20  
 94.02  
 81.63  
 77.48  
 77.16  
 76.84  
 75.17  
 74.41  
 74.33  
 74.06  
 73.62  
 71.75  
 60.26  
 60.22  
 55.29  
 40.86  
 40.71  
 37.32  
 37.24  
 29.21  
 19.45  
 19.34  
 14.49  
 14.36

**17aa** ( $^{13}\text{C}$  NMR, 101MHz,  $\text{CDCl}_3$ )

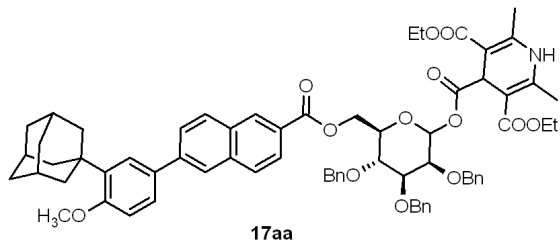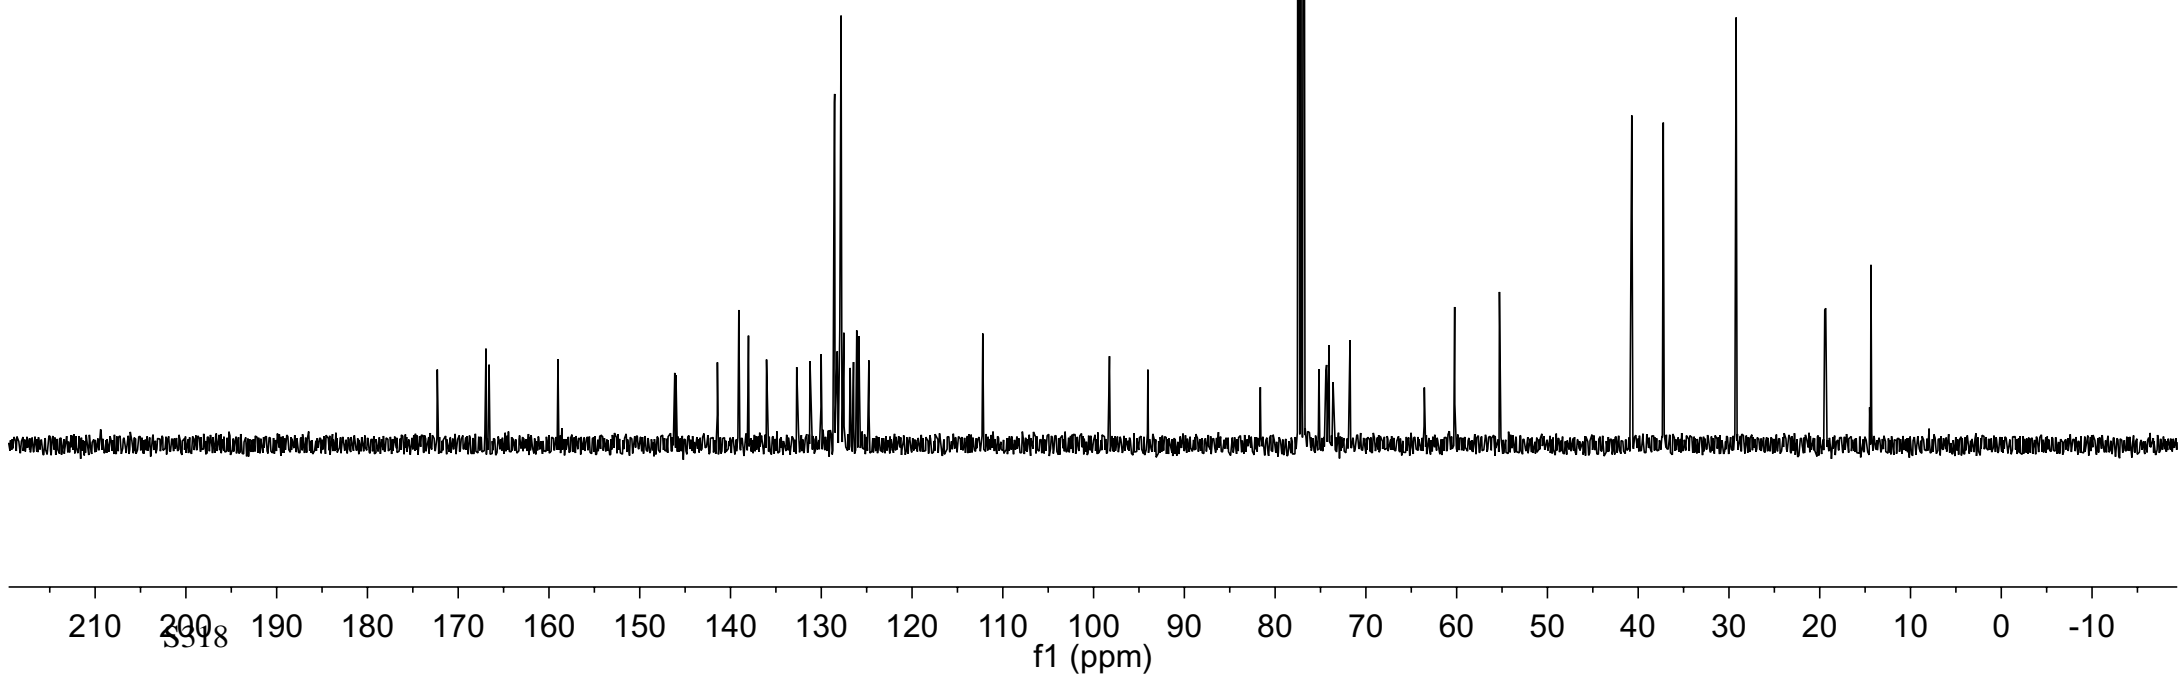

7.26  
6.48  
5.94  
4.92  
4.22  
4.21  
4.21  
4.20  
4.20  
4.19  
4.19  
4.18  
4.18  
4.17  
4.17  
4.16  
4.16  
4.15  
4.15  
3.76  
3.75  
3.62  
3.62  
3.62  
2.27  
1.75  
1.74  
1.74  
1.73  
1.73  
1.73  
1.72  
1.72  
1.71  
1.71  
1.70  
1.68  
1.67  
1.65  
1.64  
1.64  
1.63  
1.63  
1.62  
1.62  
1.62  
1.61  
1.61  
1.60  
1.59  
1.54  
1.30  
1.29  
1.28  
1.27  
1.27  
1.26

**30a** (<sup>1</sup>H NMR, 400MHz, CDCl<sub>3</sub>)

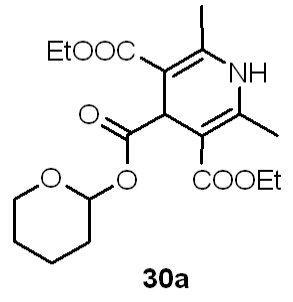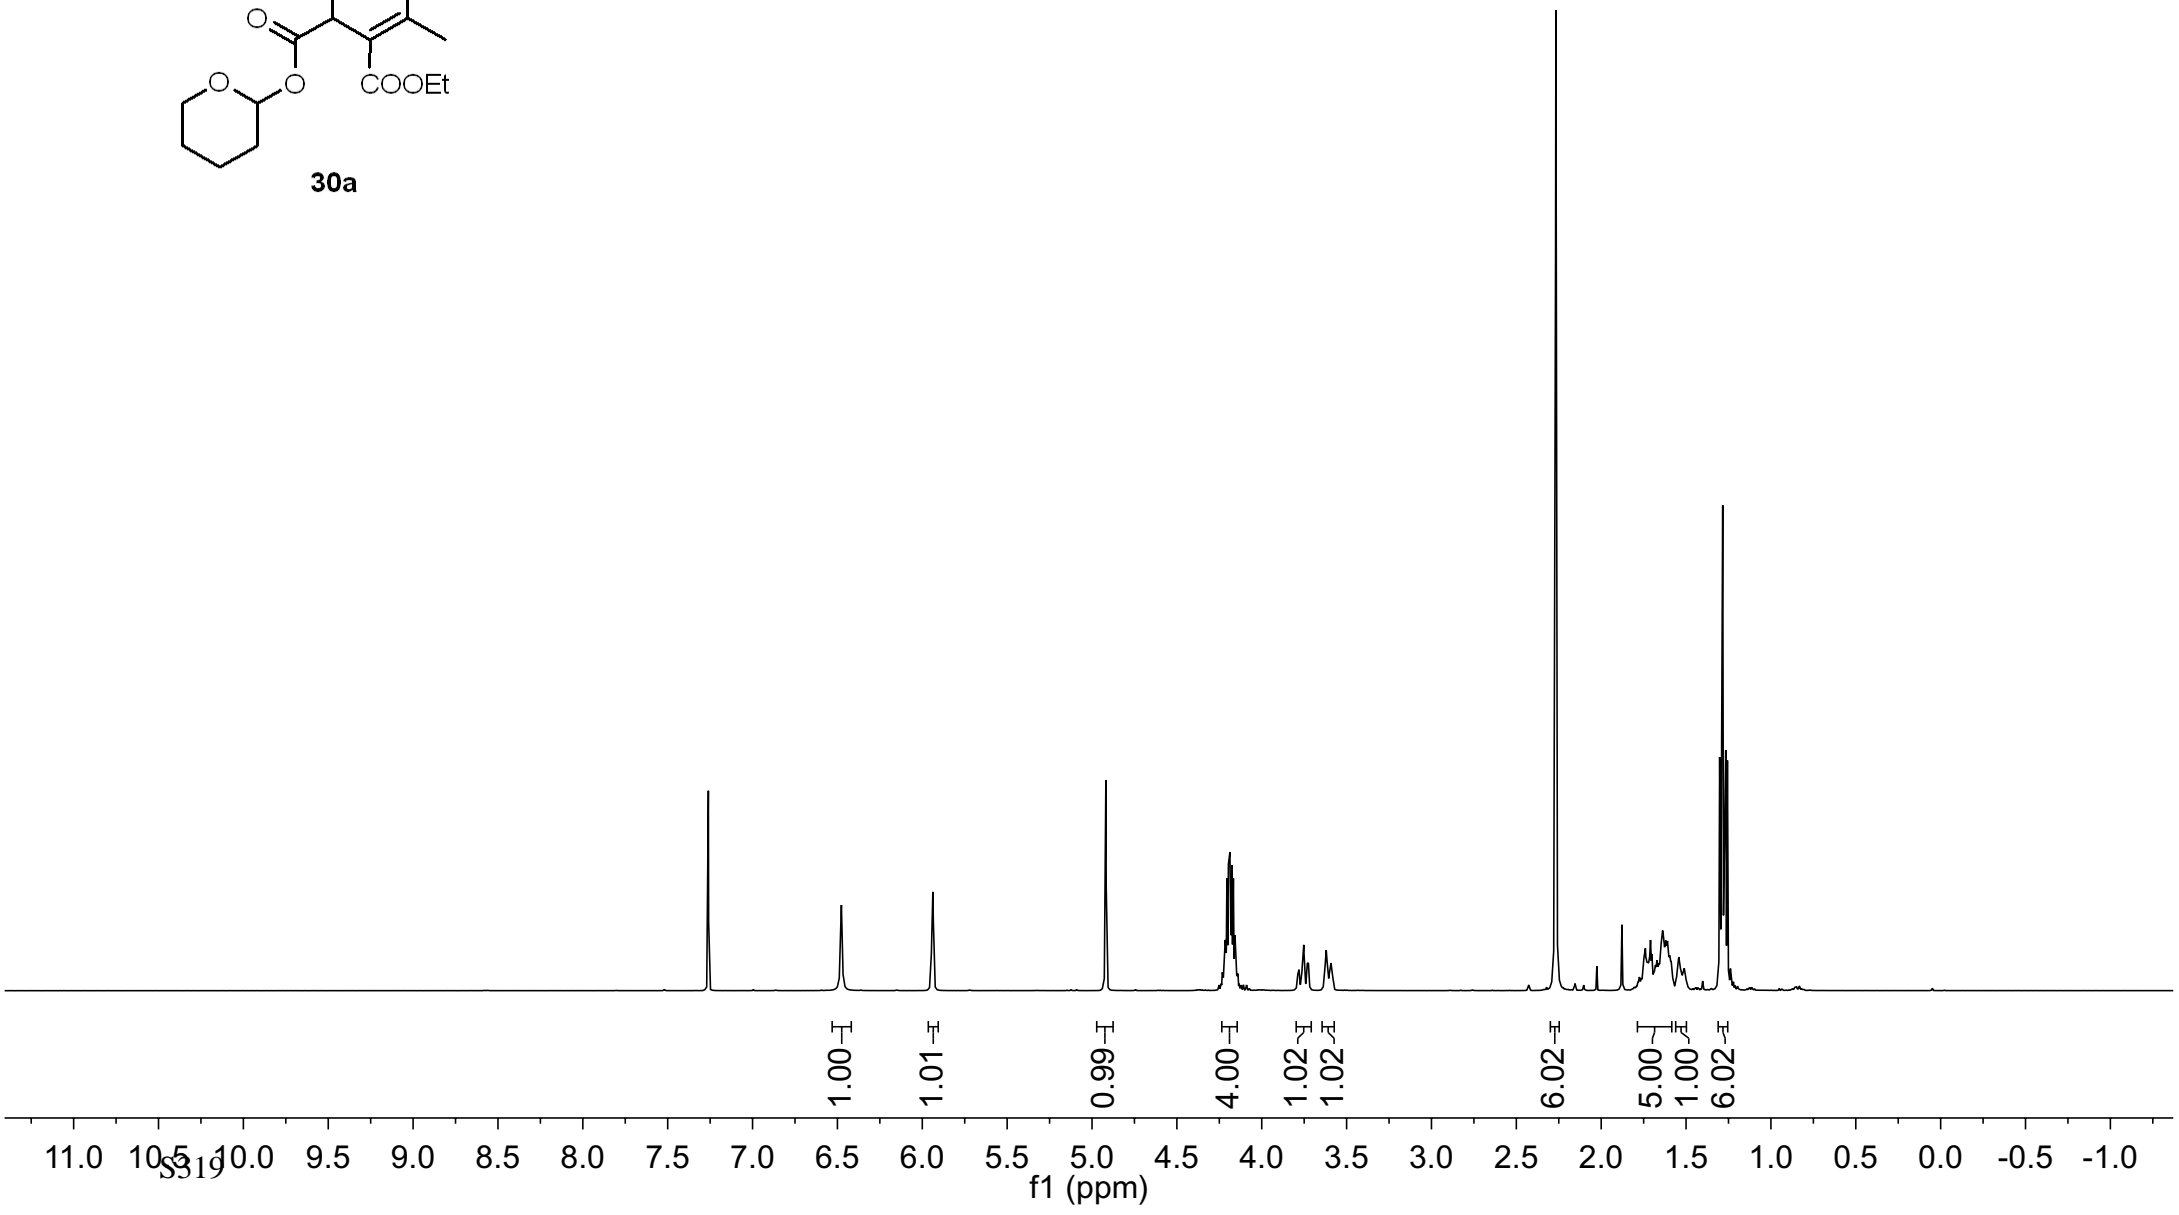

**30a** ( $^{13}\text{C}$  NMR, 101MHz,  $\text{CDCl}_3$ )

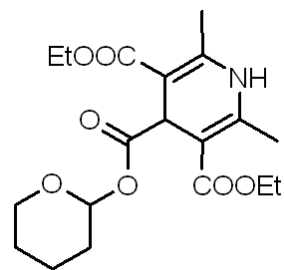

**30a**

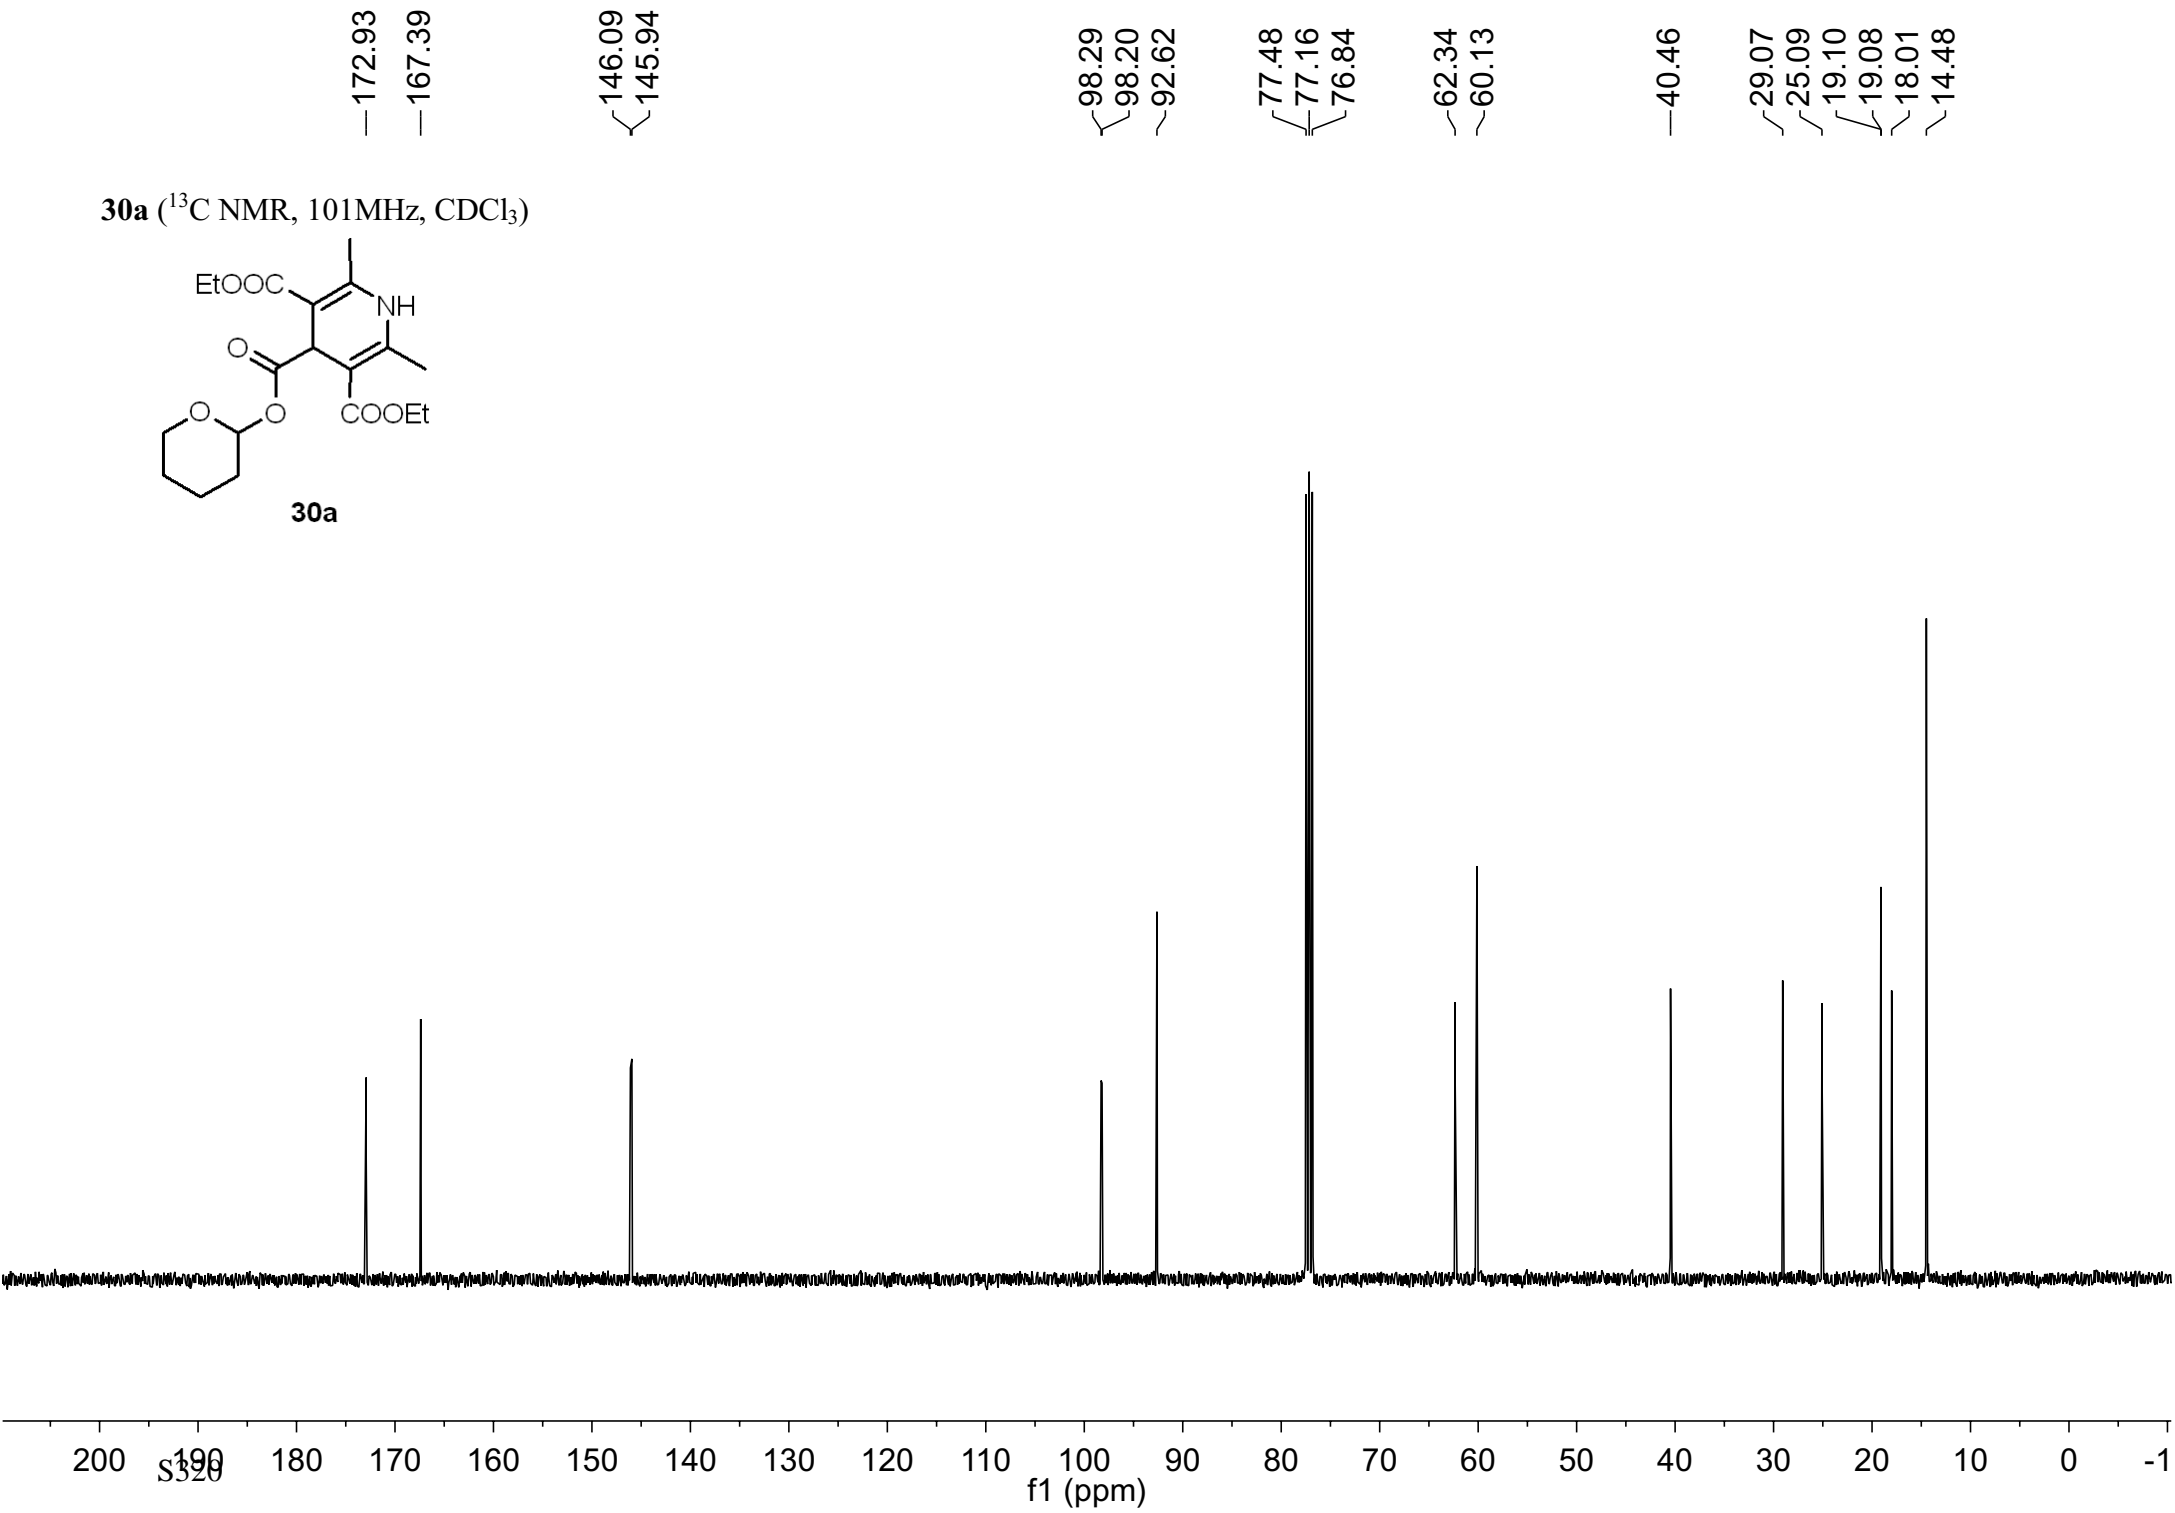

6.77  
4.79  
4.69  
4.68  
4.68  
4.67  
4.66  
4.18  
4.18  
4.17  
4.16  
4.16  
4.14  
4.14  
4.13  
4.13  
4.12  
2.23  
1.73  
1.72  
1.71  
1.70  
1.69  
1.68  
1.67  
1.66  
1.66  
1.64  
1.64  
1.63  
1.63  
1.62  
1.61  
1.46  
1.45  
1.44  
1.43  
1.42  
1.42  
1.41  
1.41  
1.40  
1.39  
1.38  
1.37  
1.35  
1.35  
1.34  
1.33  
1.32  
1.31  
1.30  
1.29  
1.28  
1.26  
1.24  
1.24  
1.22  
1.22

**30b** ( $^1\text{H}$  NMR, 400MHz,  $\text{CDCl}_3$ )

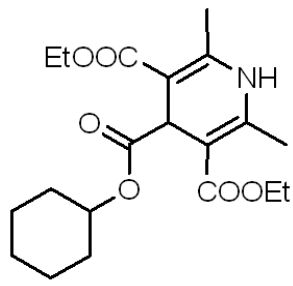

**30b**

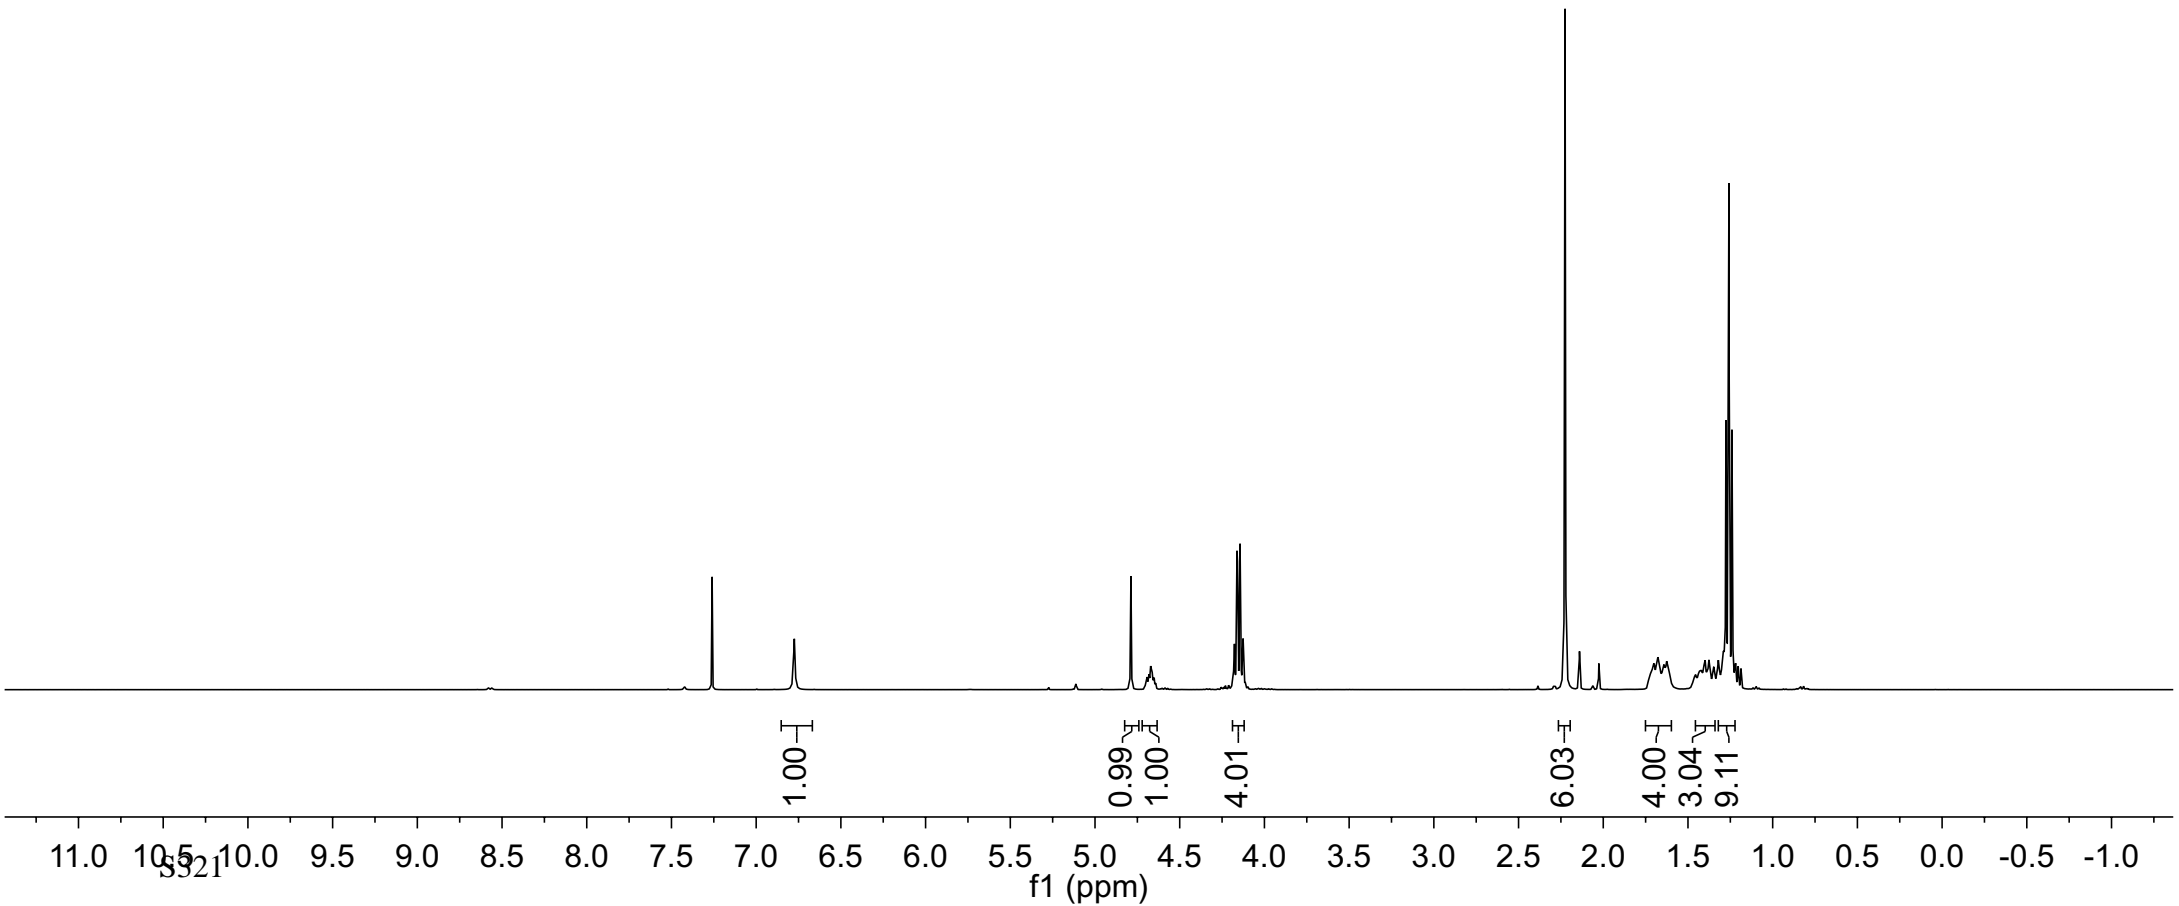

**30b** (<sup>13</sup>C NMR, 101MHz, CDCl<sub>3</sub>)

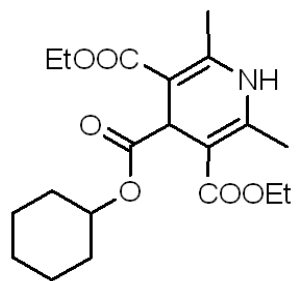

**30b**

—174.10

—167.48

—145.91

—98.44

77.48

77.16

76.84

72.77

—59.96

—40.84

—31.40

—25.46

—23.33

—18.89

—14.47

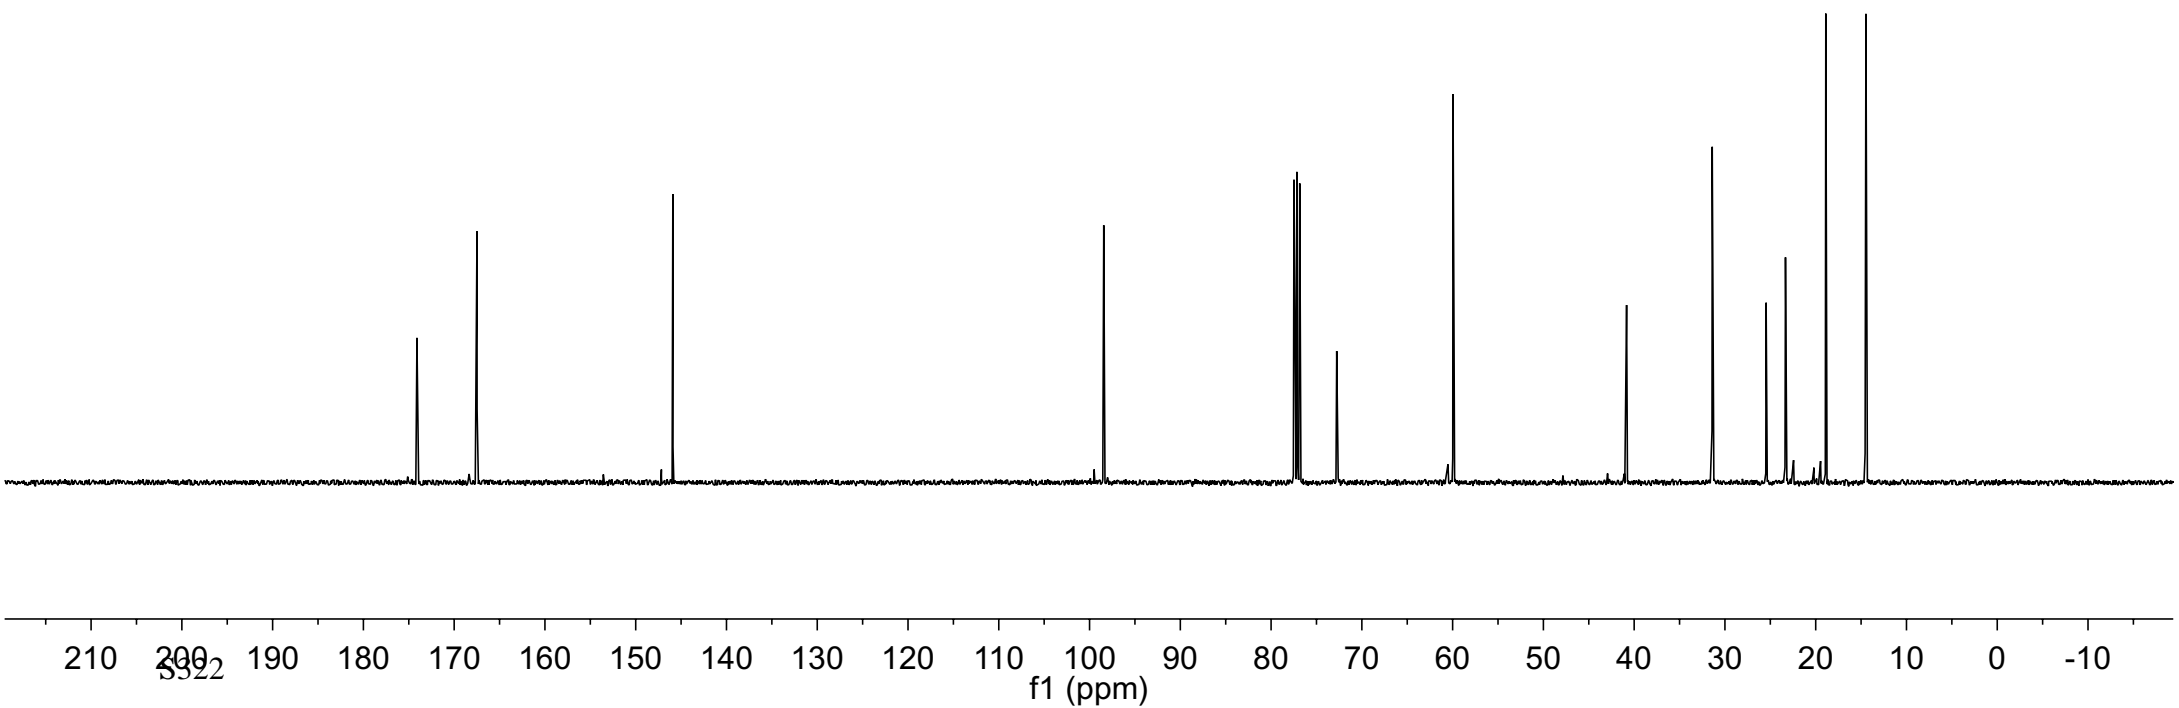

7.28  
7.27  
7.27  
7.25  
7.25  
7.24  
7.21  
7.21  
7.21  
7.20  
7.19  
7.19  
7.17  
7.17  
7.16  
7.15  
7.15  
5.95  
5.95  
5.78  
5.77  
5.08  
5.06  
5.05  
5.04  
3.78  
3.57  
3.55  
3.53  
3.52  
3.49  
3.48  
3.45

**20e** ( $^1\text{H}$  NMR, 400MHz,  $\text{CDCl}_3$ )

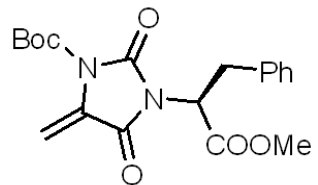

**20e**

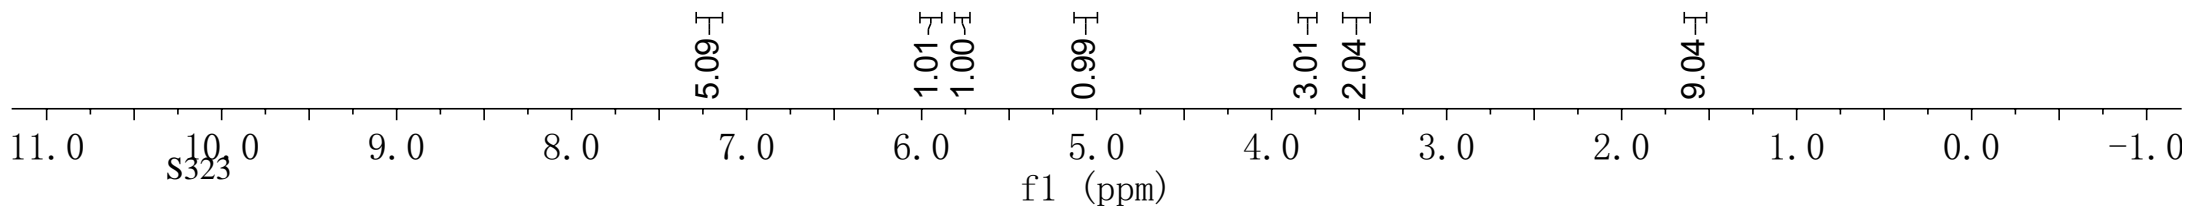

**20e** ( $^{13}\text{C}$  NMR, 101MHz,  $\text{CDCl}_3$ )

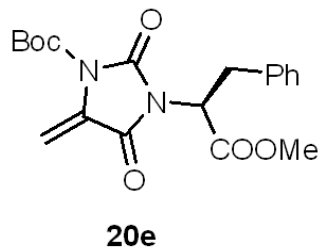

—168.40  
—160.40  
~149.54  
~147.69  
/136.21  
/131.53  
/128.80  
/128.78  
/127.12

—105.69

—85.58

—77.16

~54.18

~53.14

—33.94

27.99

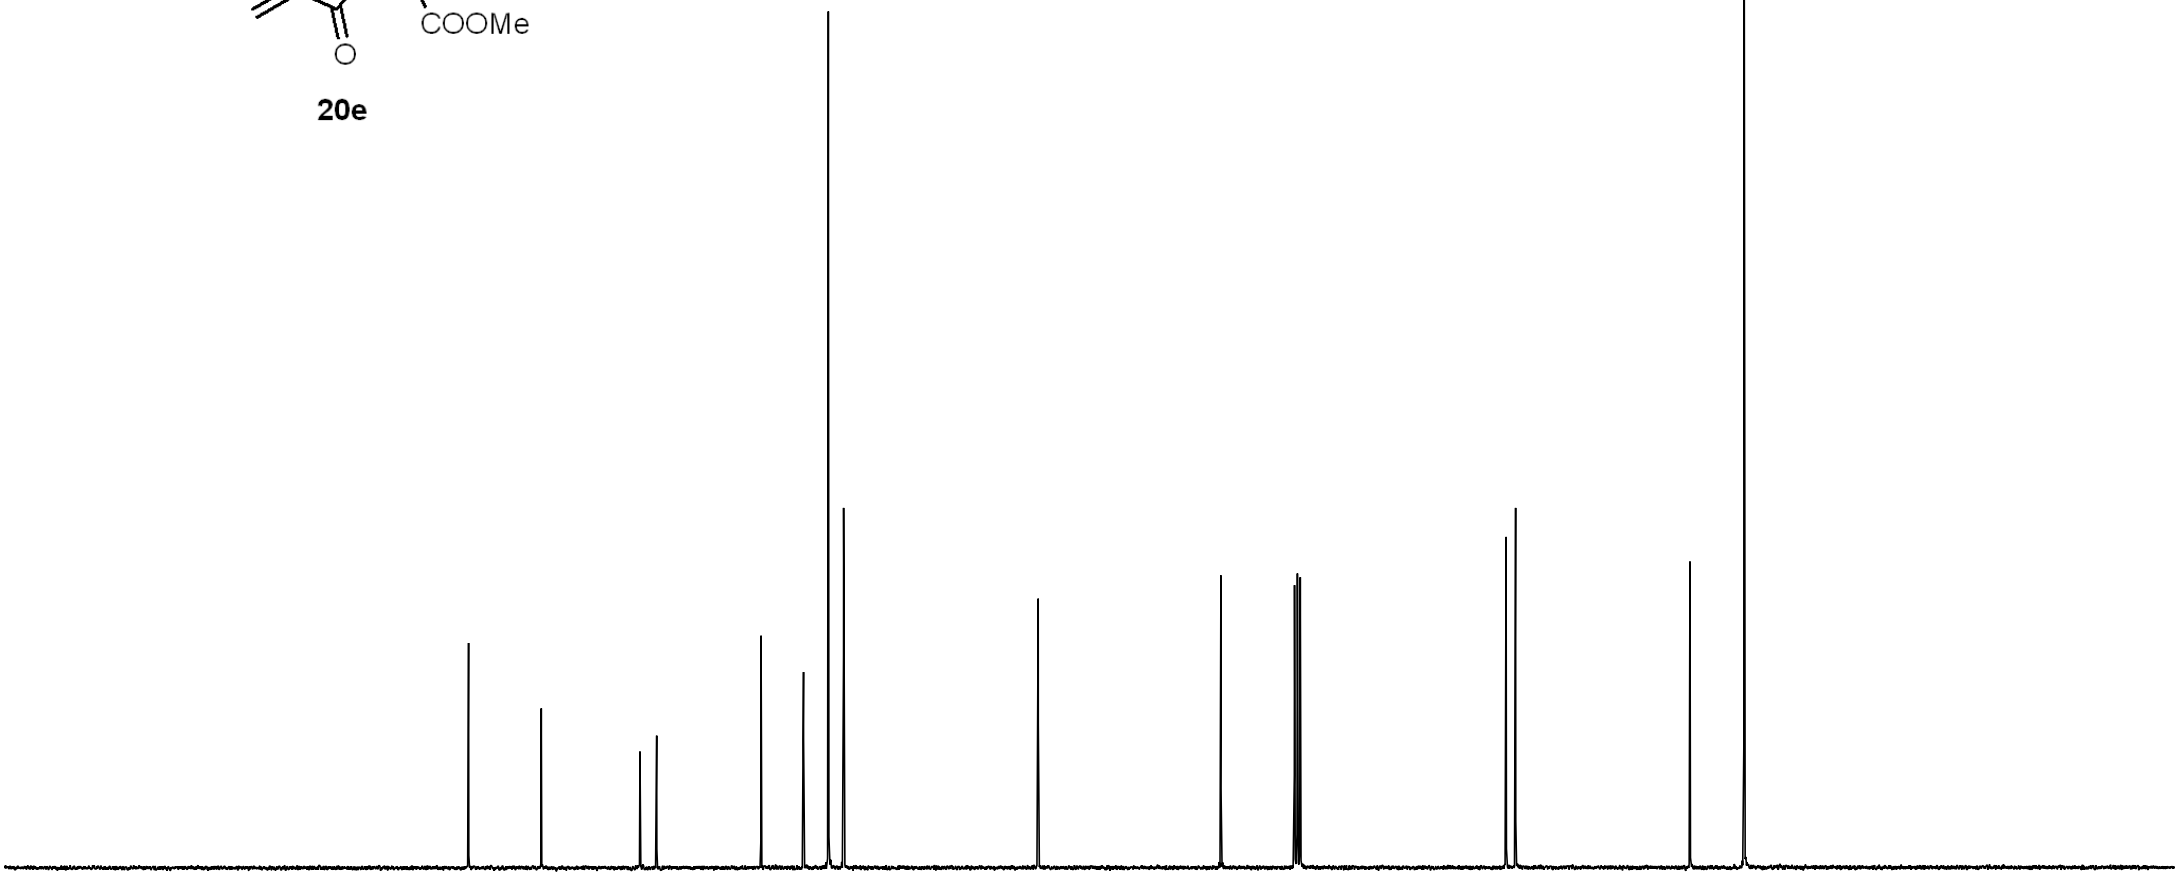

210 200 190 180 170 160 150 140 130 120 110 100 90 80 70 60 50 40 30 20 10 0 -10

S324

f1 (ppm)

7.42  
7.41  
7.41  
7.40  
7.40  
7.39  
7.38  
7.38  
7.38  
7.37  
7.36  
7.36  
7.35  
7.34  
7.32  
7.30  
7.17  
7.17  
7.15  
7.15  
6.88  
6.88  
6.87  
6.86  
6.42  
5.41  
5.27  
5.26  
5.25  
5.23  
5.20  
5.19  
5.05  
5.03  
5.02  
5.00  
3.72  
3.46  
3.45  
3.43  
3.41  
3.17  
3.15  
3.14  
3.11  
1.47  
1.42

**20f** (<sup>1</sup>H NMR, 400MHz, CDCl<sub>3</sub>)

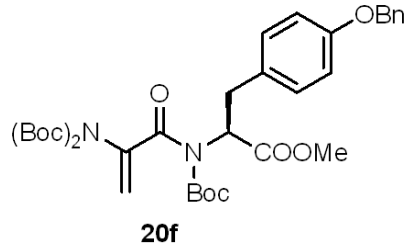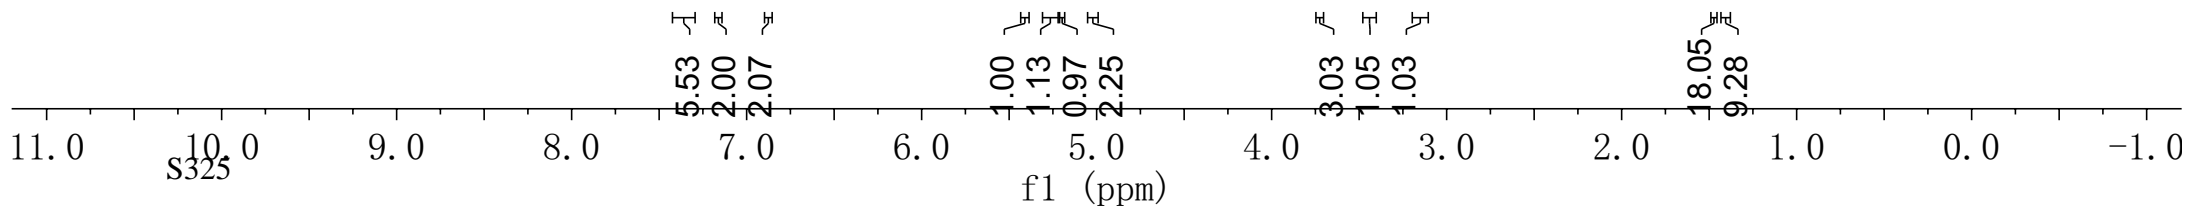



**20f** ( $^{13}\text{C}$  NMR, 101MHz,  $\text{CDCl}_3$ )

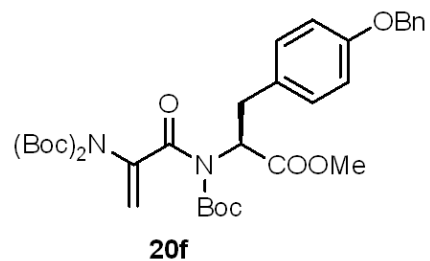

~170.70  
~168.12  
~157.64  
~151.66  
~151.04  
138.20  
137.16  
130.59  
130.38  
130.02  
128.61  
127.97  
127.50  
127.46  
118.46  
114.89

~84.69  
~83.93  
~83.41  
~77.16  
~70.01

~59.04  
~52.32

~35.17  
~27.90  
~27.77

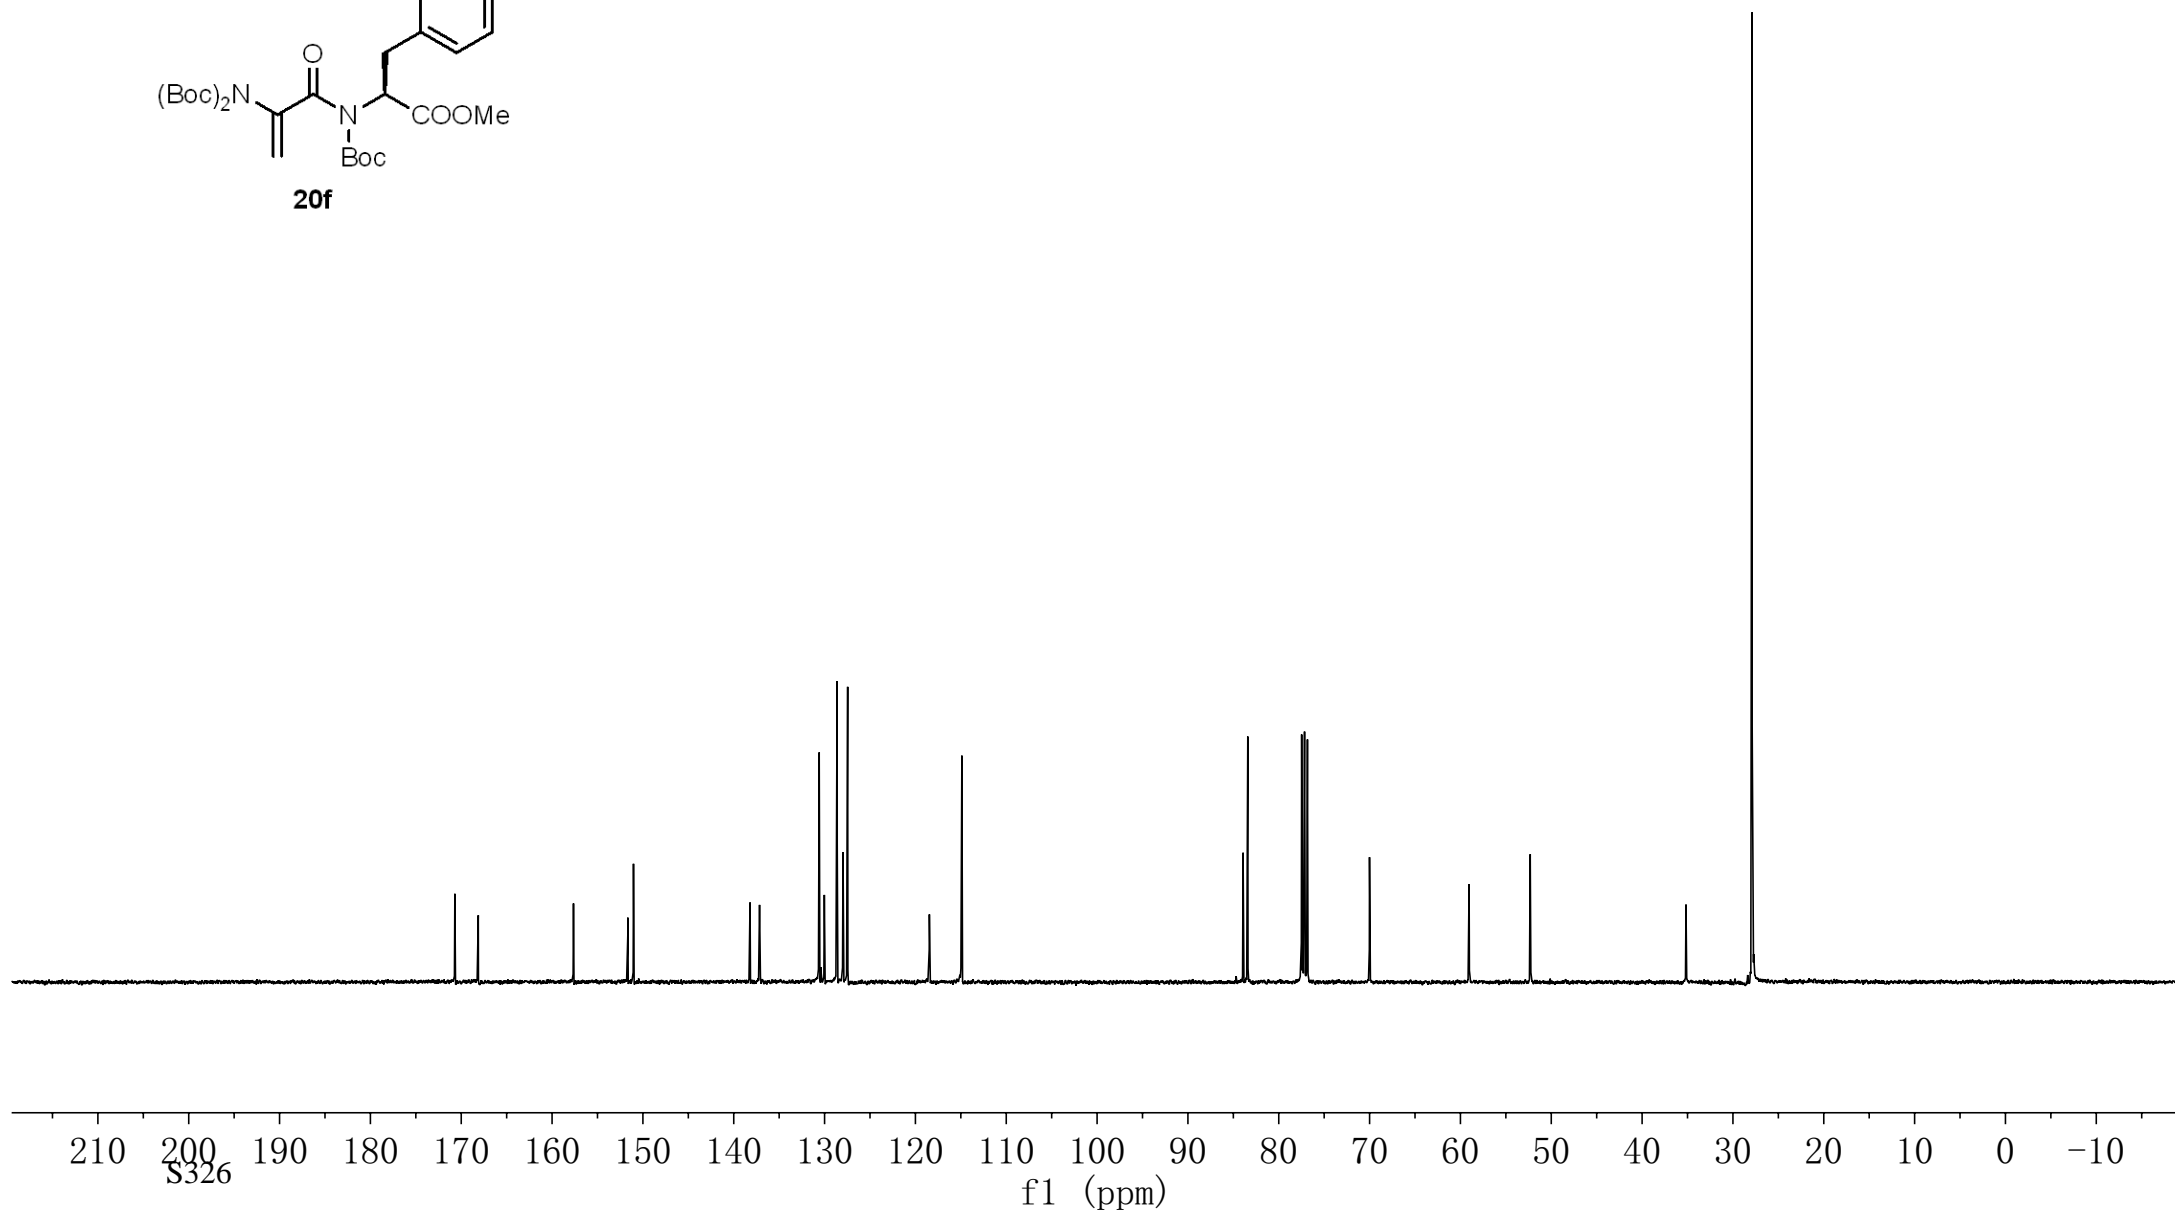

20g (<sup>1</sup>H NMR, 400MHz, CDCl<sub>3</sub>)

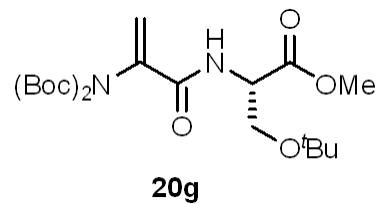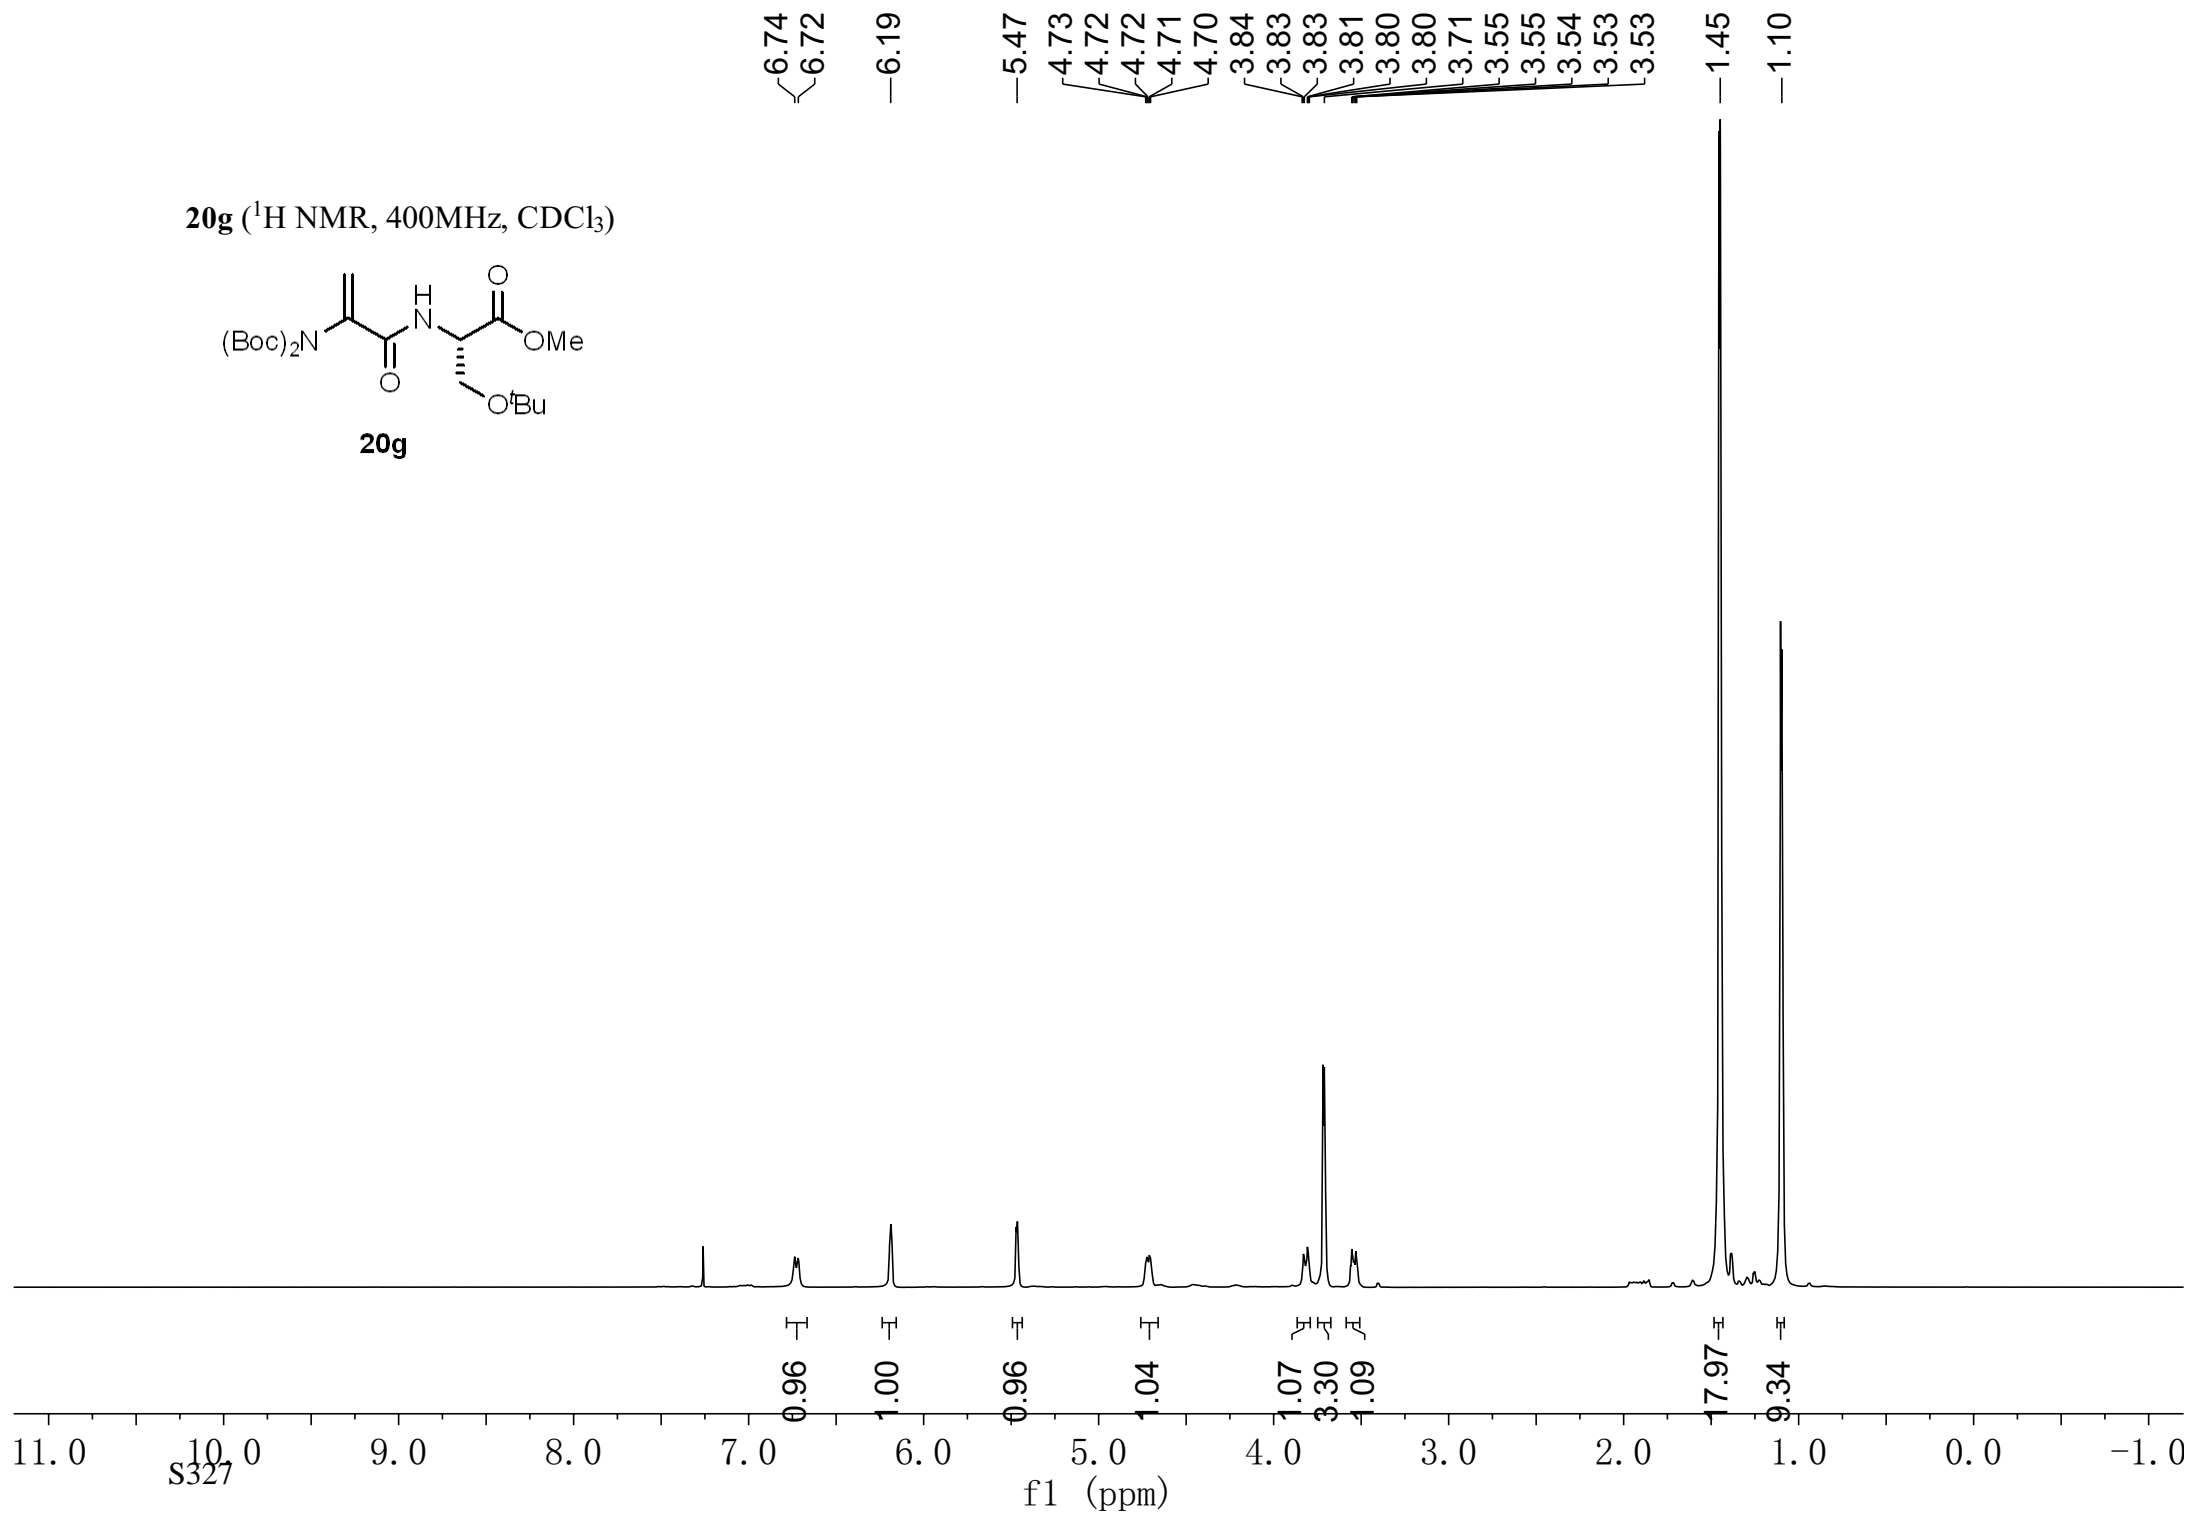

**20g** ( $^{13}\text{C}$  NMR, 101MHz,  $\text{CDCl}_3$ )

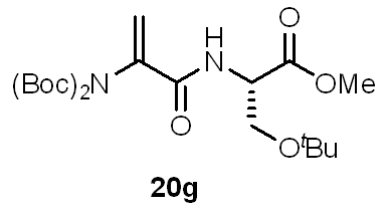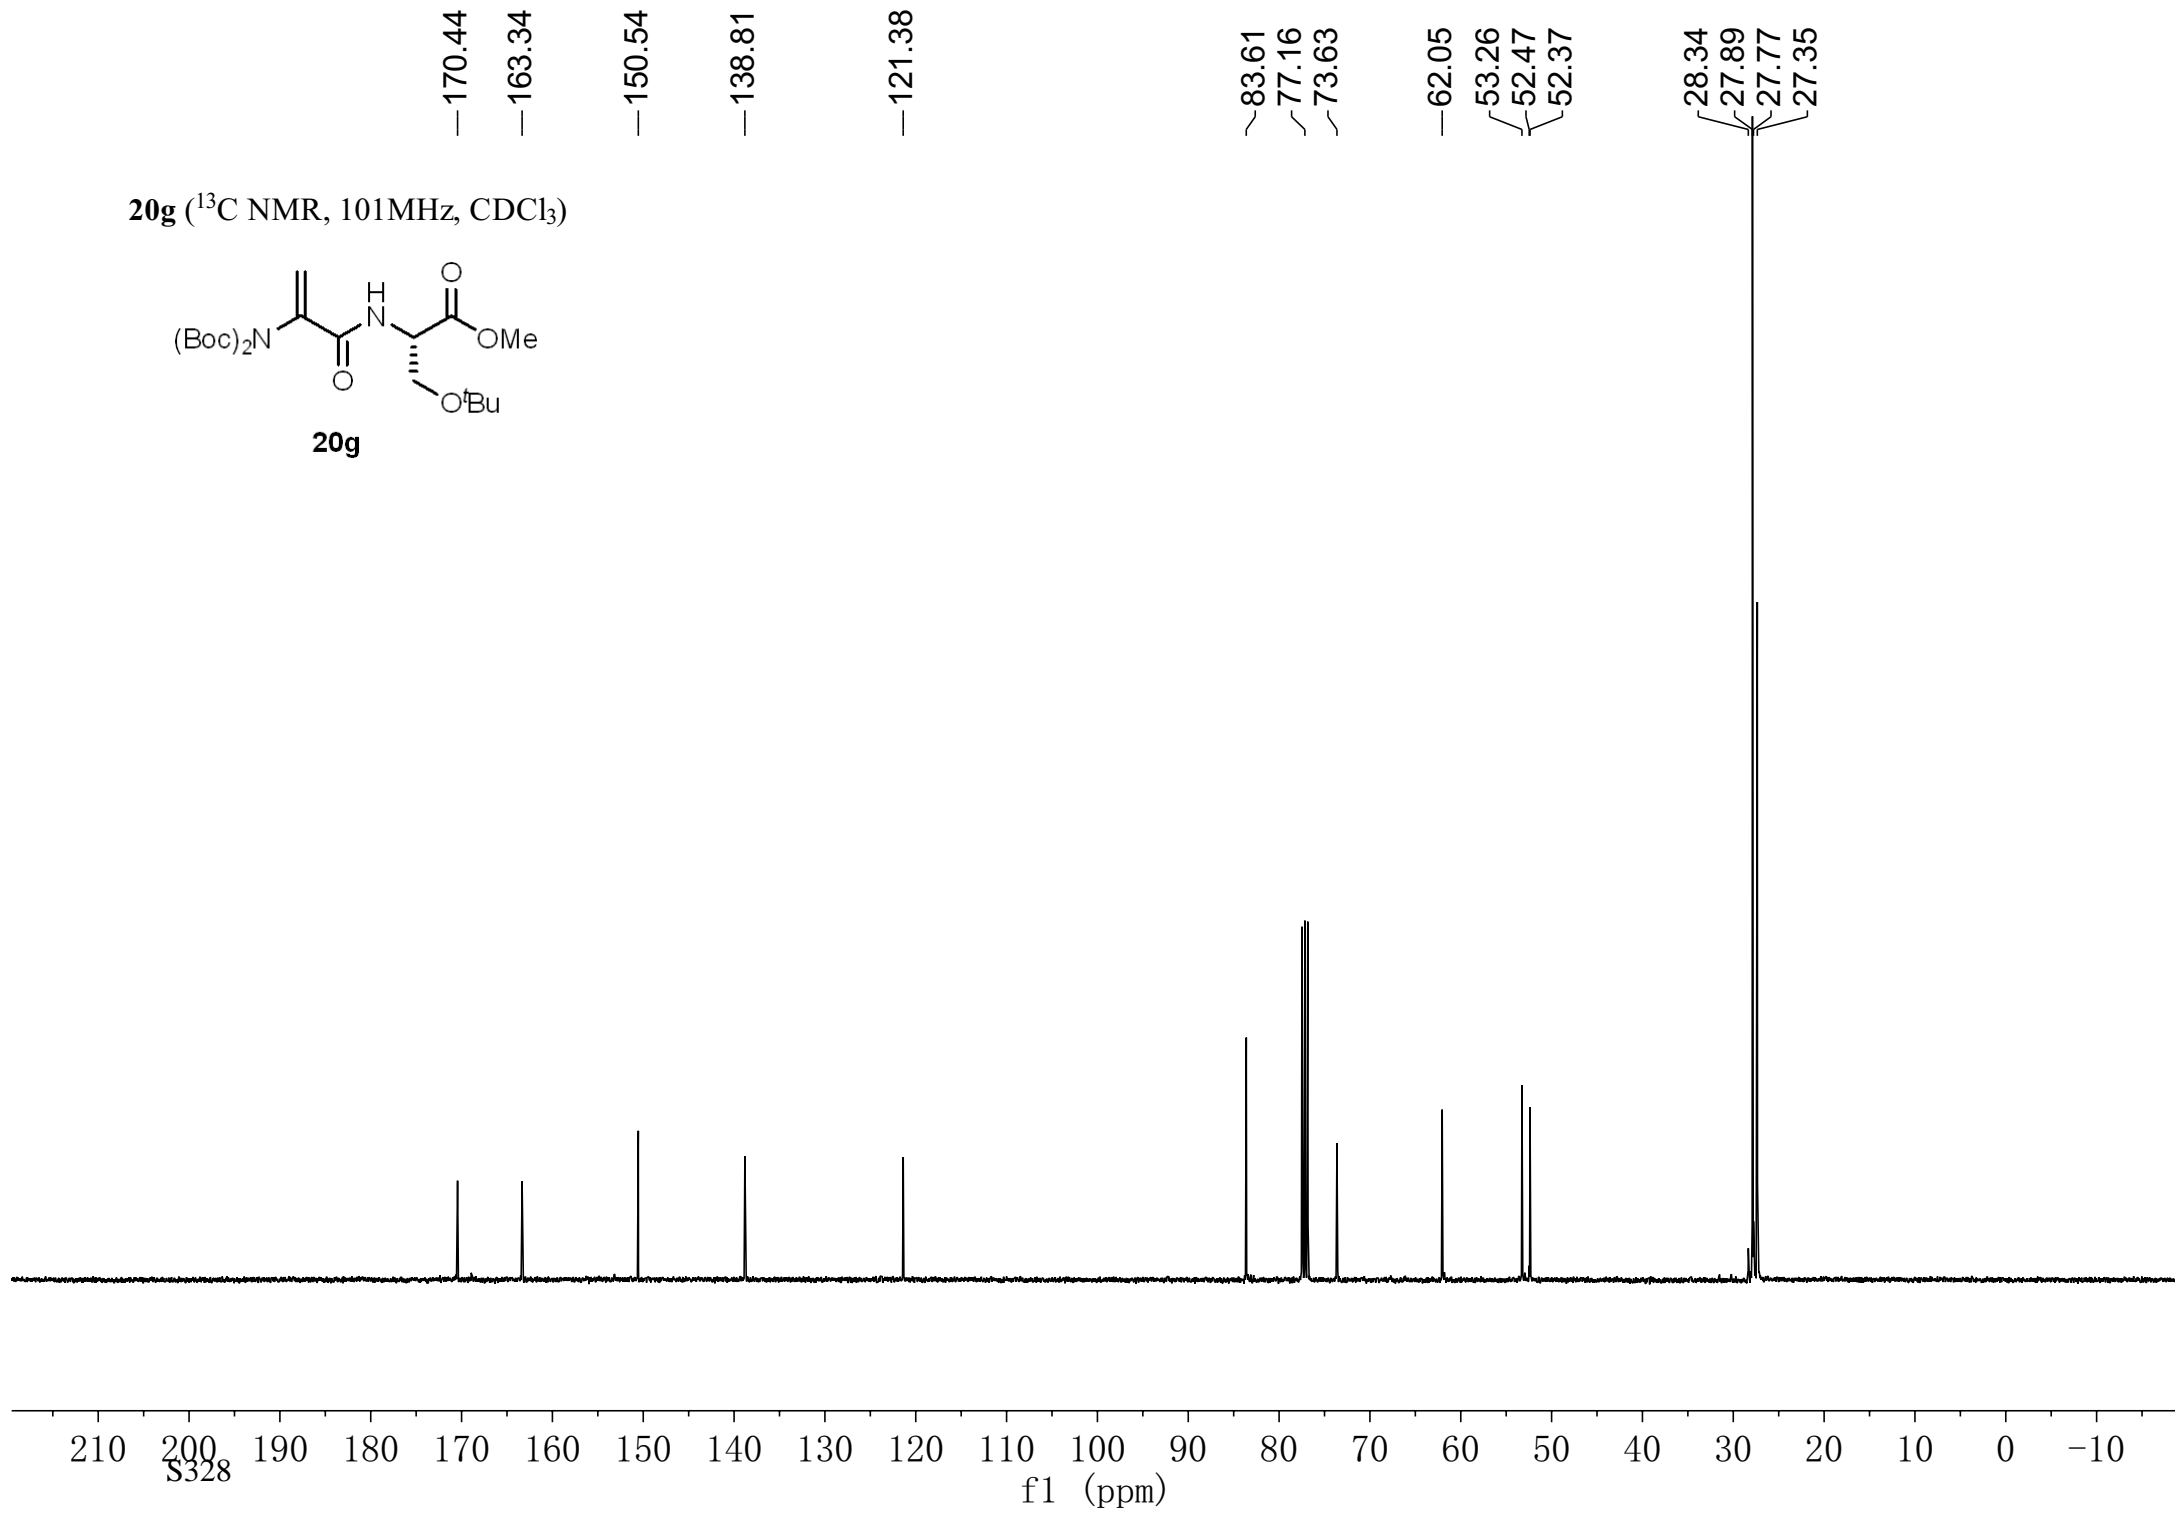

**20i** ( $^1\text{H}$  NMR, 400MHz,  $\text{CDCl}_3$ )

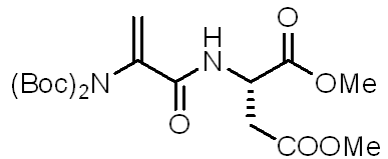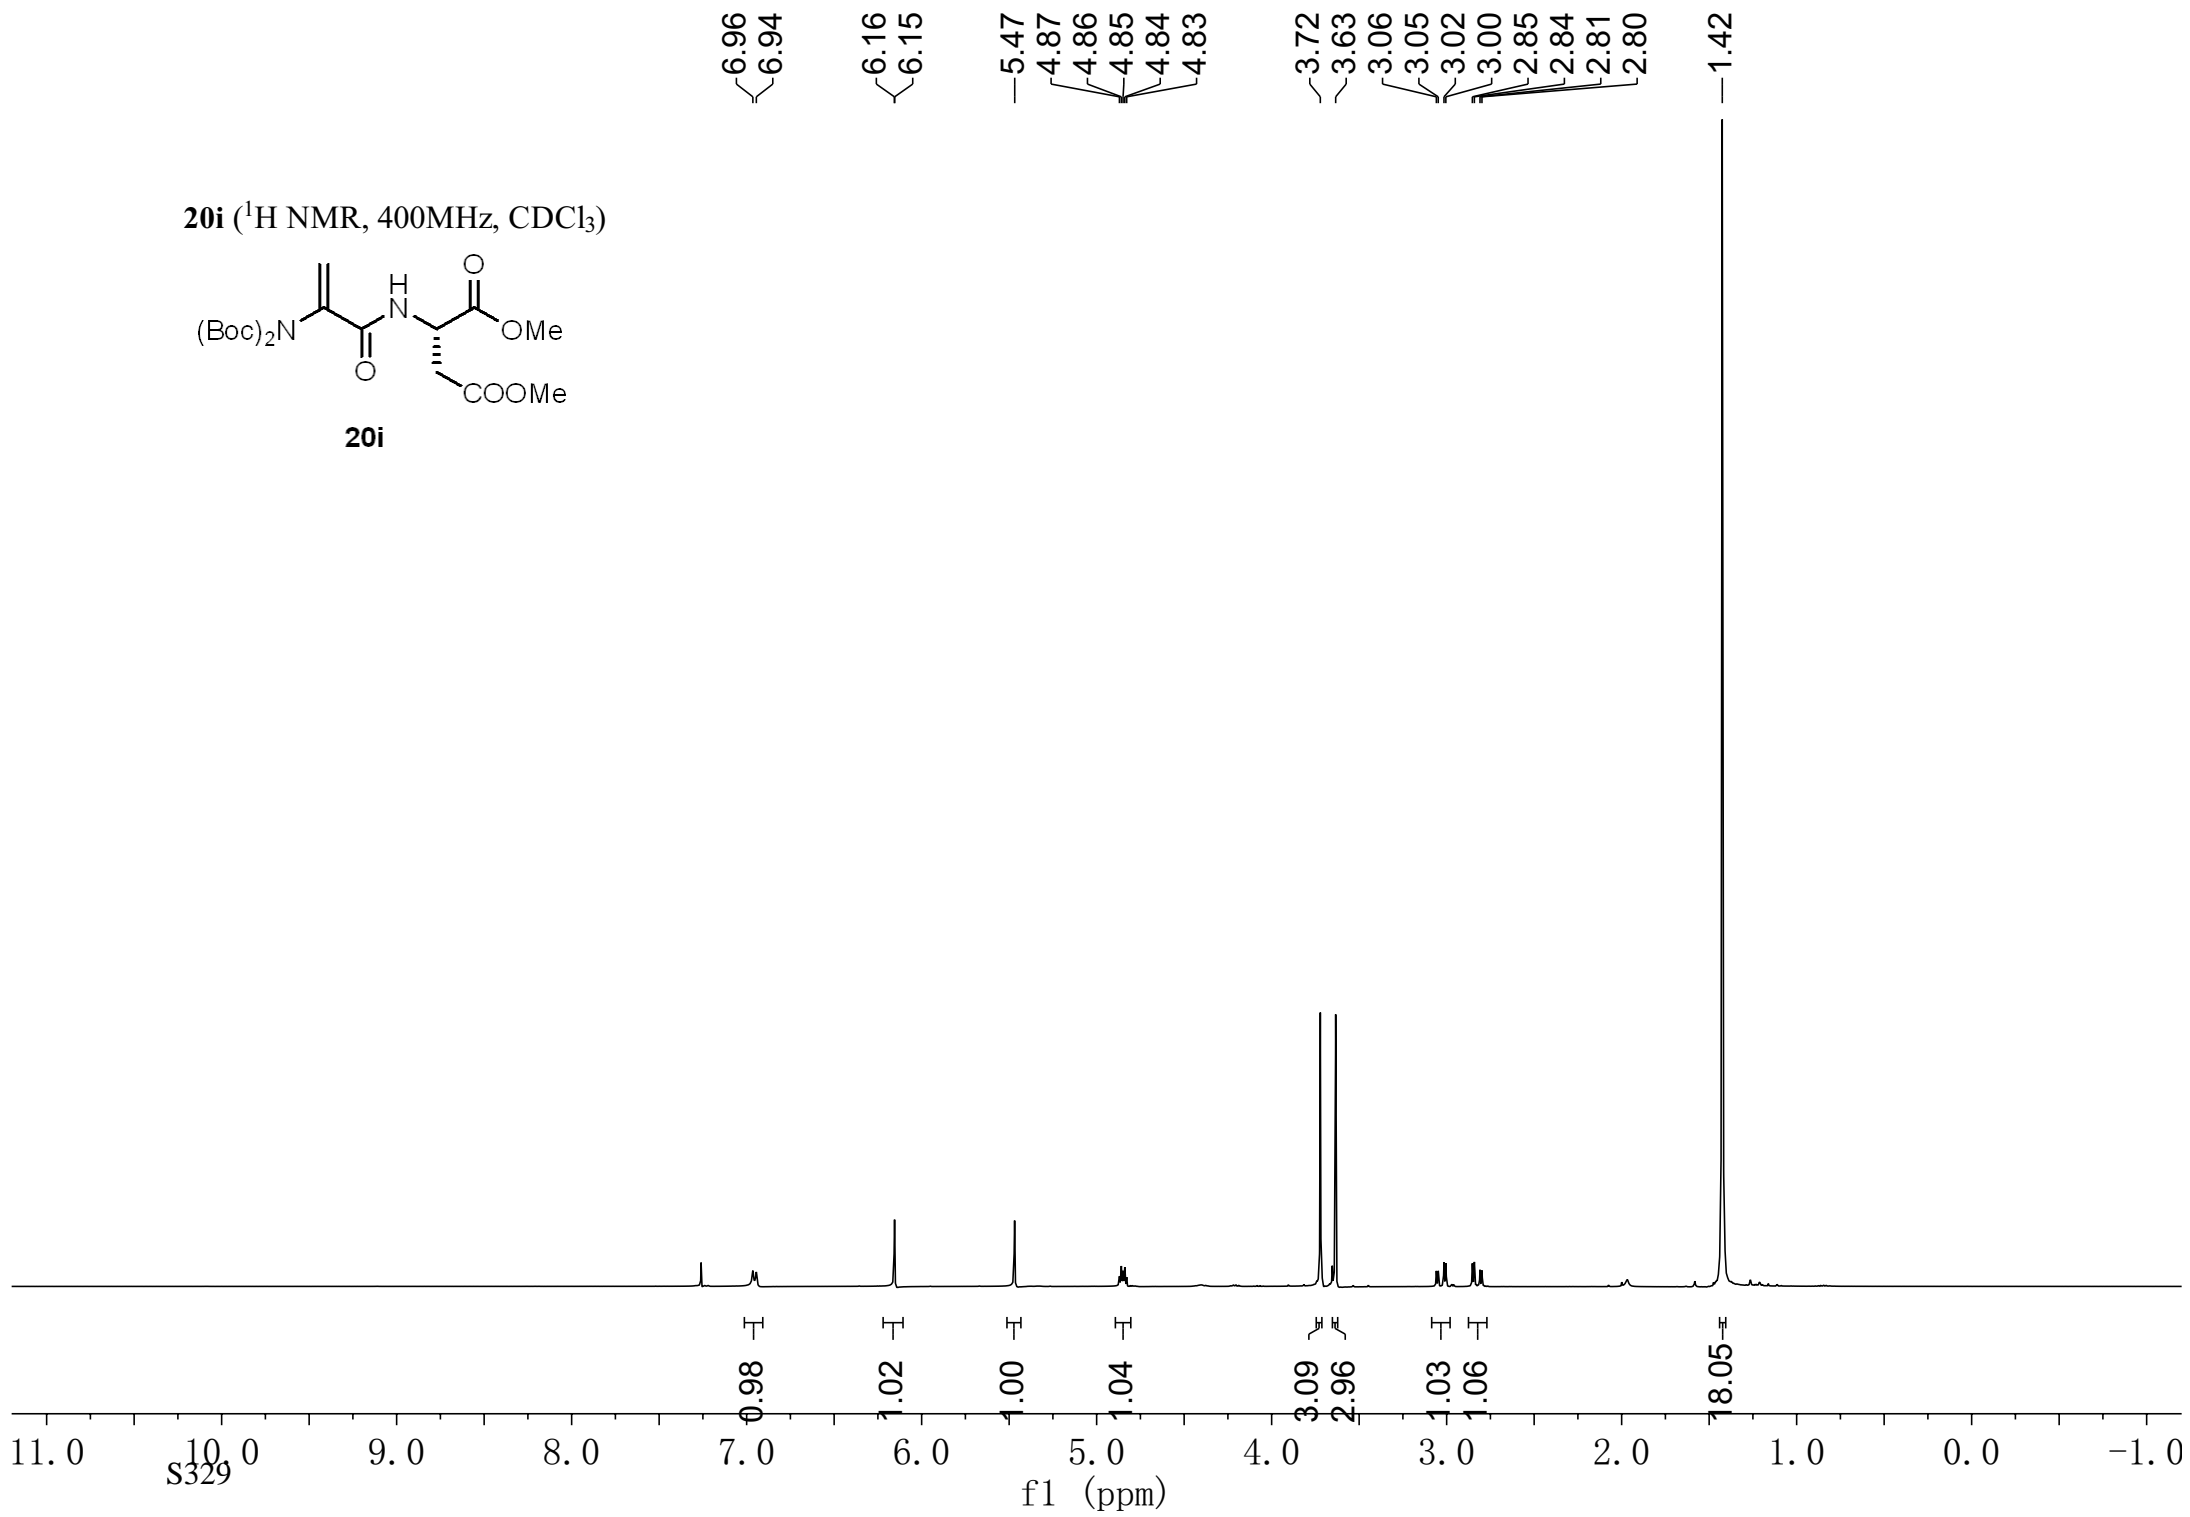

**20i** ( $^{13}\text{C}$  NMR, 101MHz,  $\text{CDCl}_3$ )

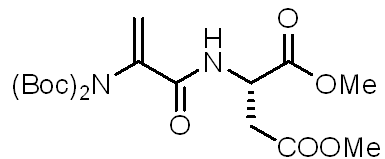

171.27  
170.72  
169.05  
163.25  
— 150.48  
— 138.58  
— 121.49  
— 83.64  
— 77.16  
52.87  
52.06  
48.82  
36.02  
28.26  
27.81  
27.71

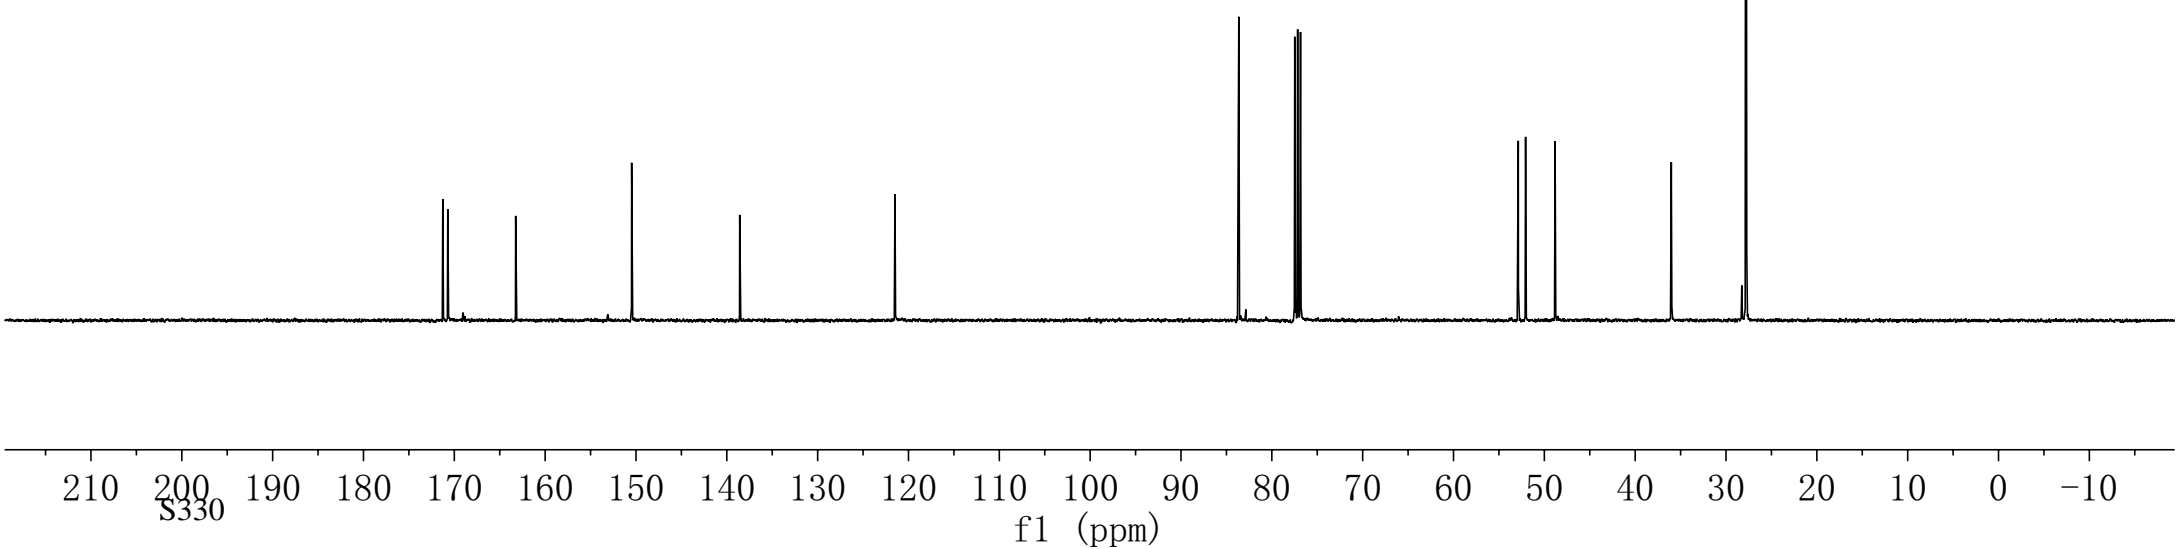

**20j** (<sup>1</sup>H NMR, 400MHz, CDCl<sub>3</sub>)

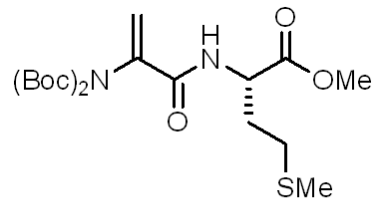

**20j**

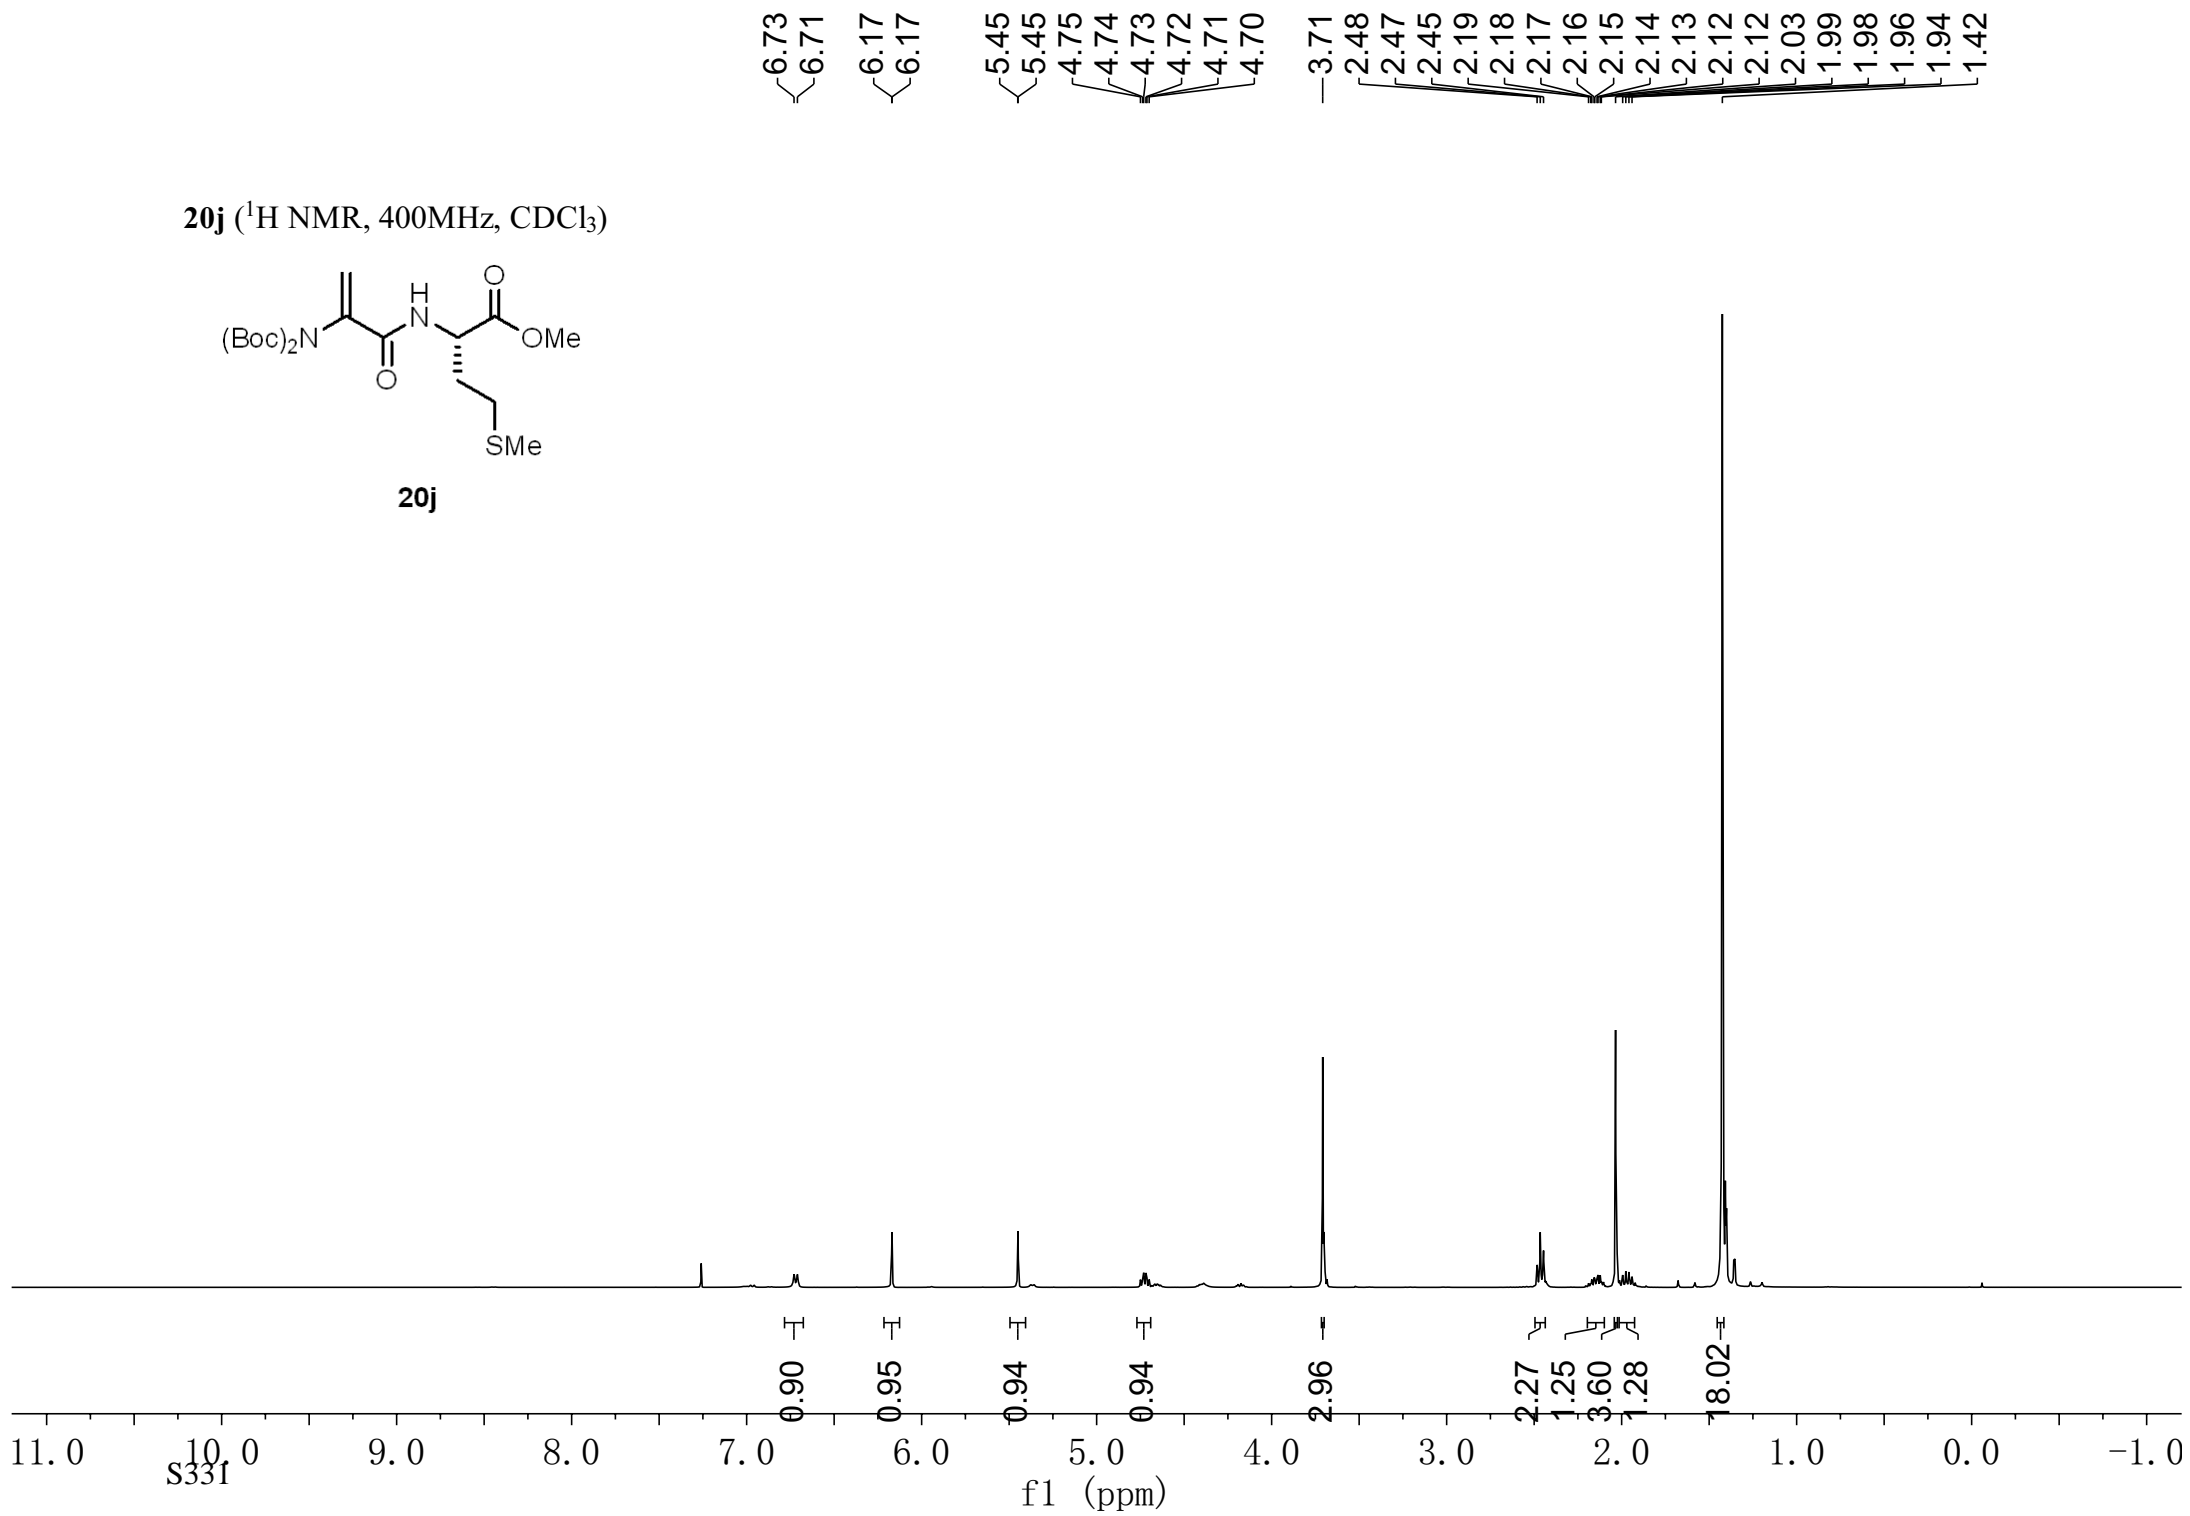

**20j** (<sup>13</sup>C NMR, 101MHz, CDCl<sub>3</sub>)

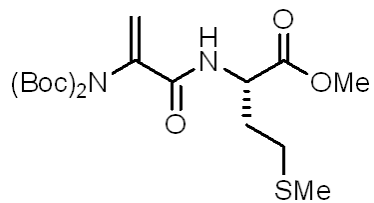

**20j**

—171.89 —163.21 —150.55 —138.60 —121.44 —83.73 —82.86 —77.16 —52.56 —51.77 —31.53 —29.83 —28.25 —27.84 —27.68 —15.37

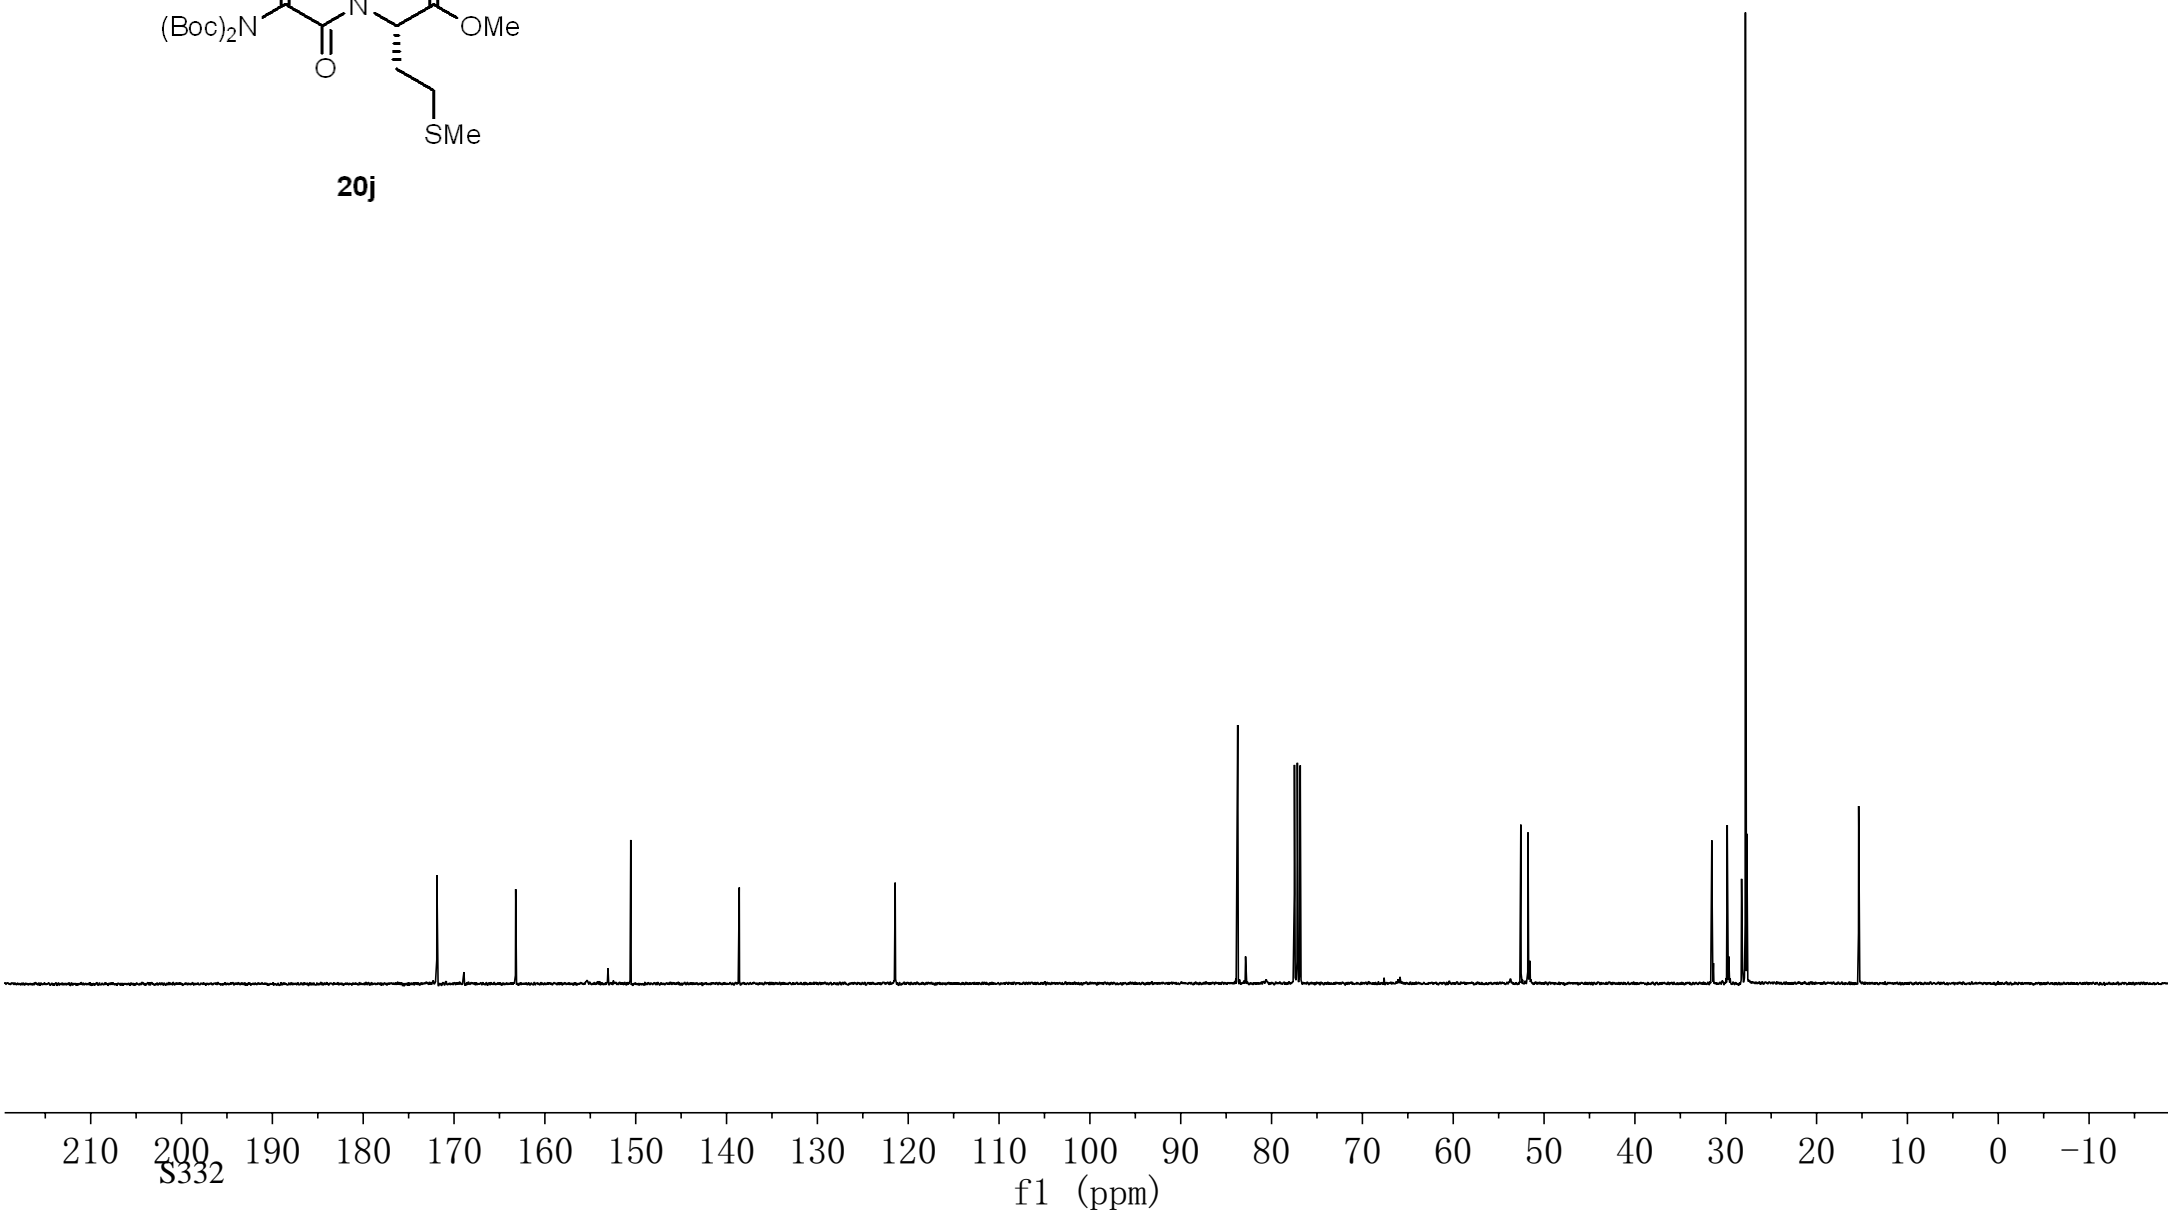

7.31  
7.31  
7.30  
7.29  
7.29  
7.28  
7.28  
7.26  
6.75  
6.73

—6.20

—5.50  
4.85  
4.84  
4.84  
4.83  
4.82

3.72  
3.68  
2.94  
2.93  
2.90  
2.89  
2.84  
2.83  
2.81  
2.79

—1.45

**20k** (<sup>1</sup>H NMR, 400MHz, CDCl<sub>3</sub>)

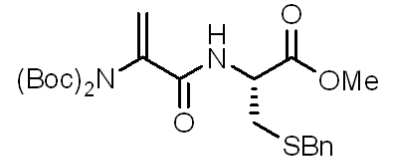

**20k**

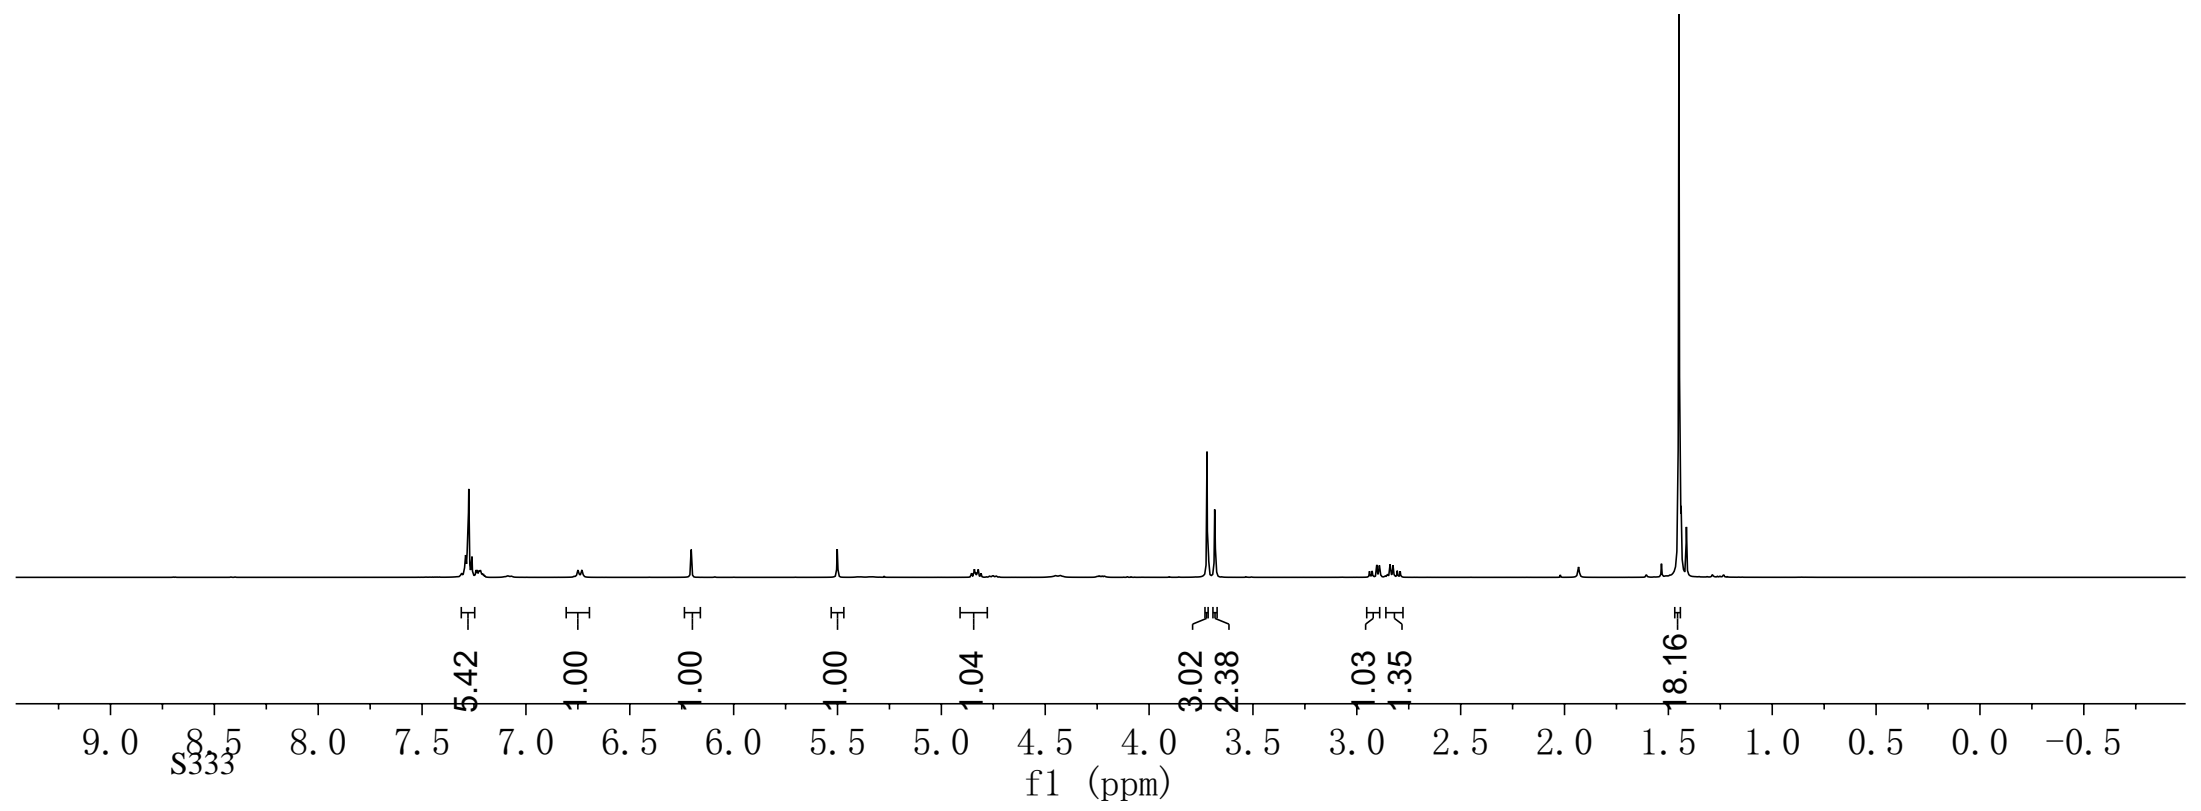



170.88  
169.10  
169.03  
163.32  
— 150.57  
138.61  
137.53  
129.01  
128.63  
127.29  
121.64

83.81  
82.90  
77.16

52.70  
51.96  
36.67  
36.50  
33.30  
33.11  
28.32  
27.88  
27.74  
27.69

**20k** (<sup>13</sup>C NMR, 101MHz, CDCl<sub>3</sub>)

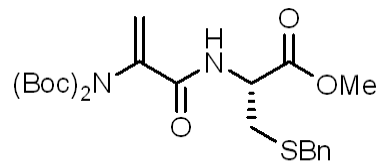

**20k**

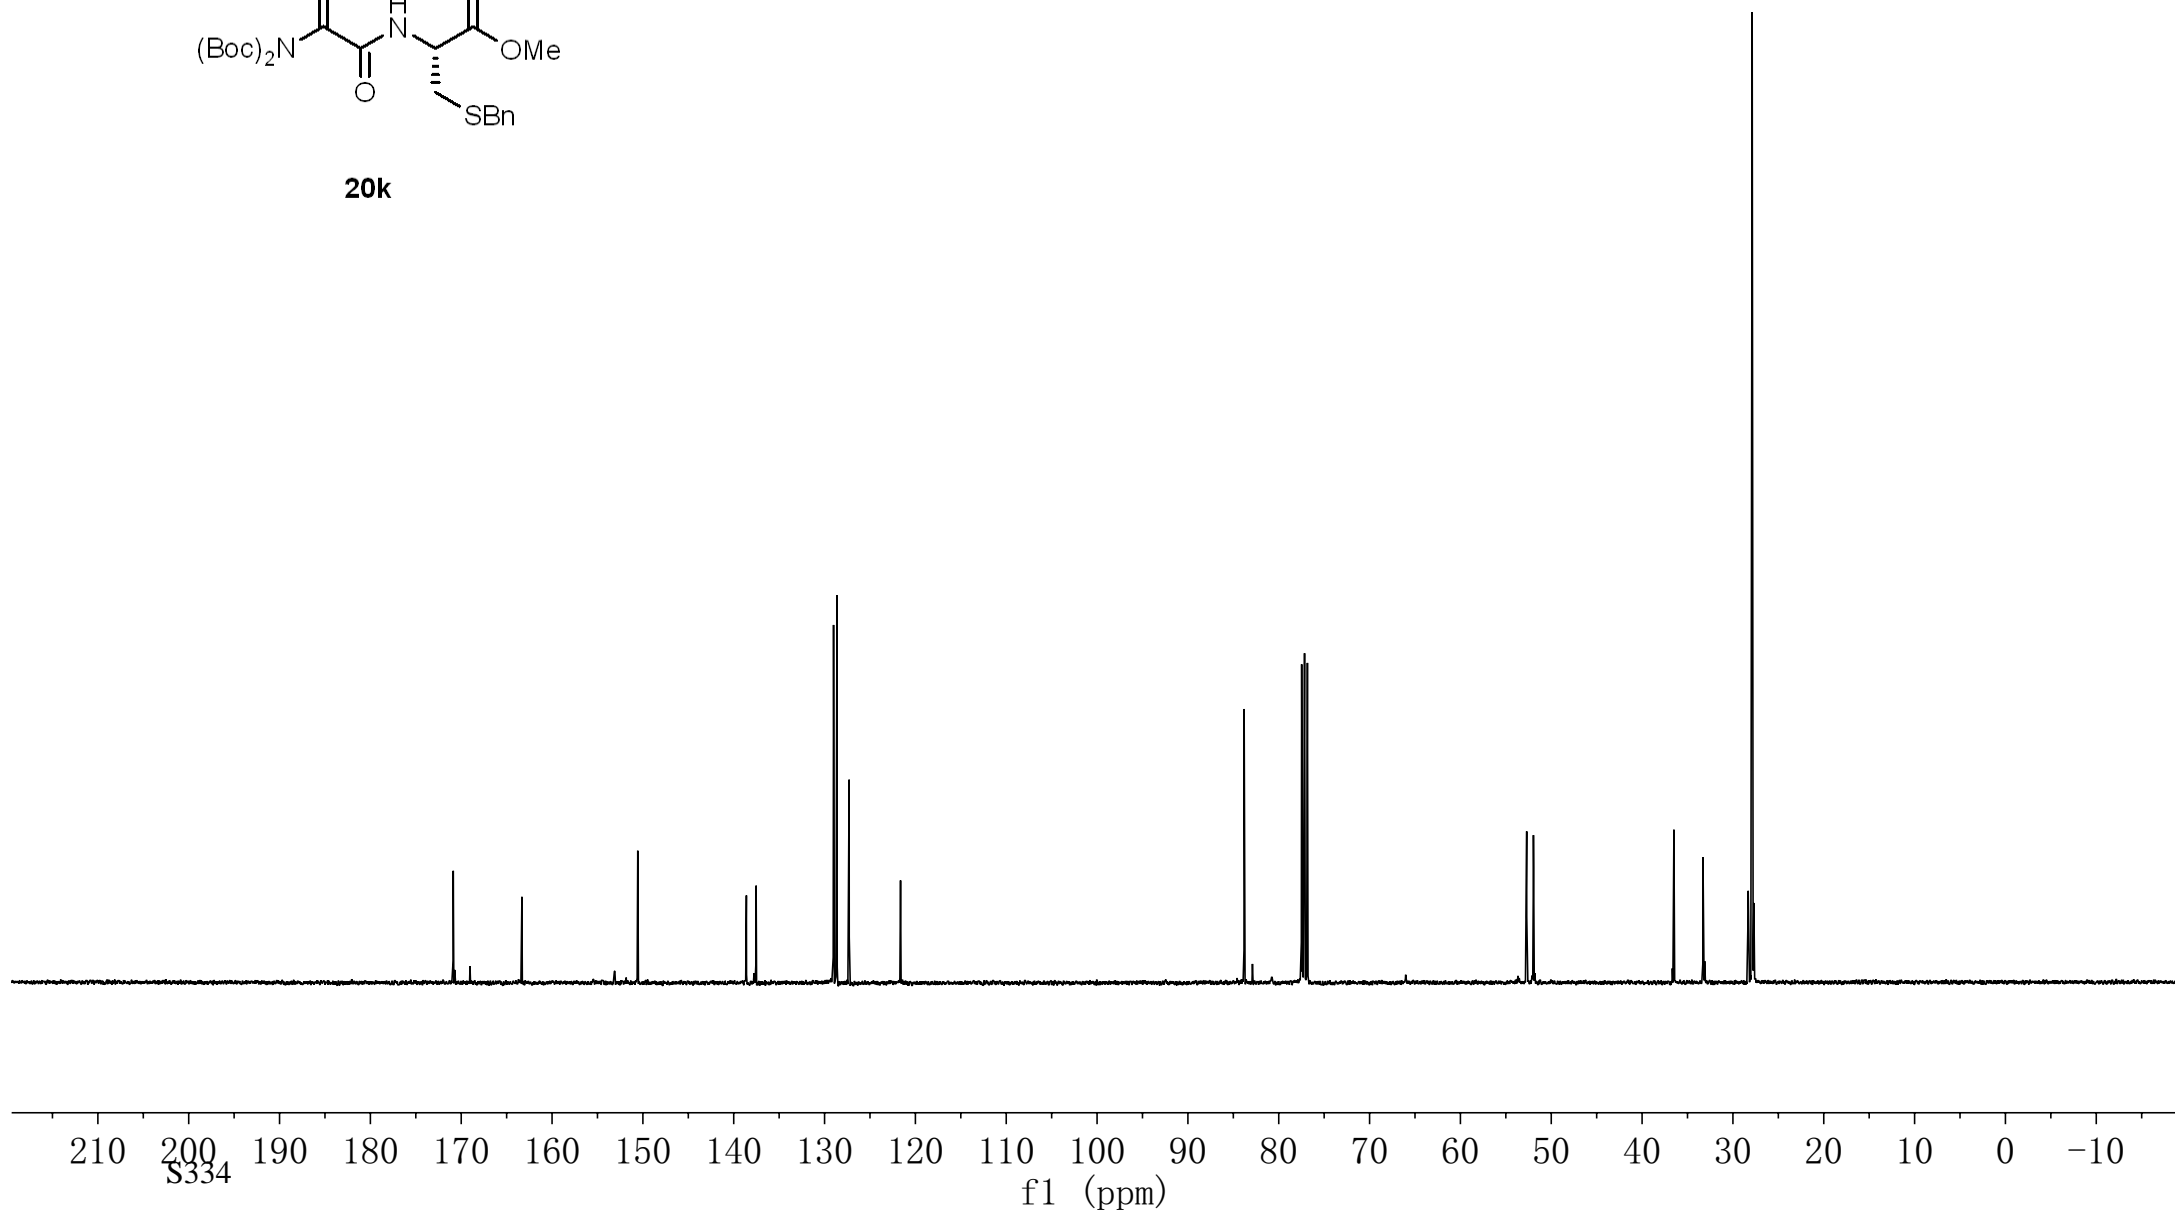

7.26  
6.75  
6.71  
6.69  
6.26  
5.46  
4.50  
4.48  
4.45  
4.43  
3.70  
2.17  
2.15  
2.15  
2.14  
2.13  
2.12  
2.12  
2.10  
2.10  
2.09  
1.41  
1.30  
1.29  
1.29  
1.28  
1.27  
1.25  
1.24  
1.23  
1.23  
1.22  
1.21  
1.21  
1.15  
1.14  
1.13  
1.12  
1.12  
1.11  
1.10  
1.09  
1.08  
1.07  
1.07  
1.05  
1.05  
0.90  
0.89  
0.88  
0.87  
0.86  
0.86  
0.85  
0.84  
0.83

20m (<sup>1</sup>H NMR, 400MHz, CDCl<sub>3</sub>)

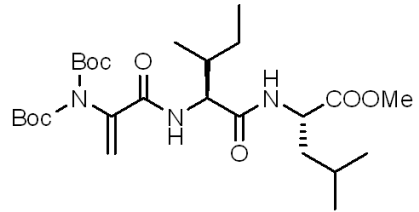

20m

16  
15  
14  
13  
12  
11  
10  
9  
8  
7  
6  
5  
4  
3  
2  
1  
0  
-1  
-2  
-3

2.00  
0.94  
0.95  
2.05  
3.08  
1.09  
1.01  
18.15  
1.14  
1.13  
14.30

f1 (ppm)

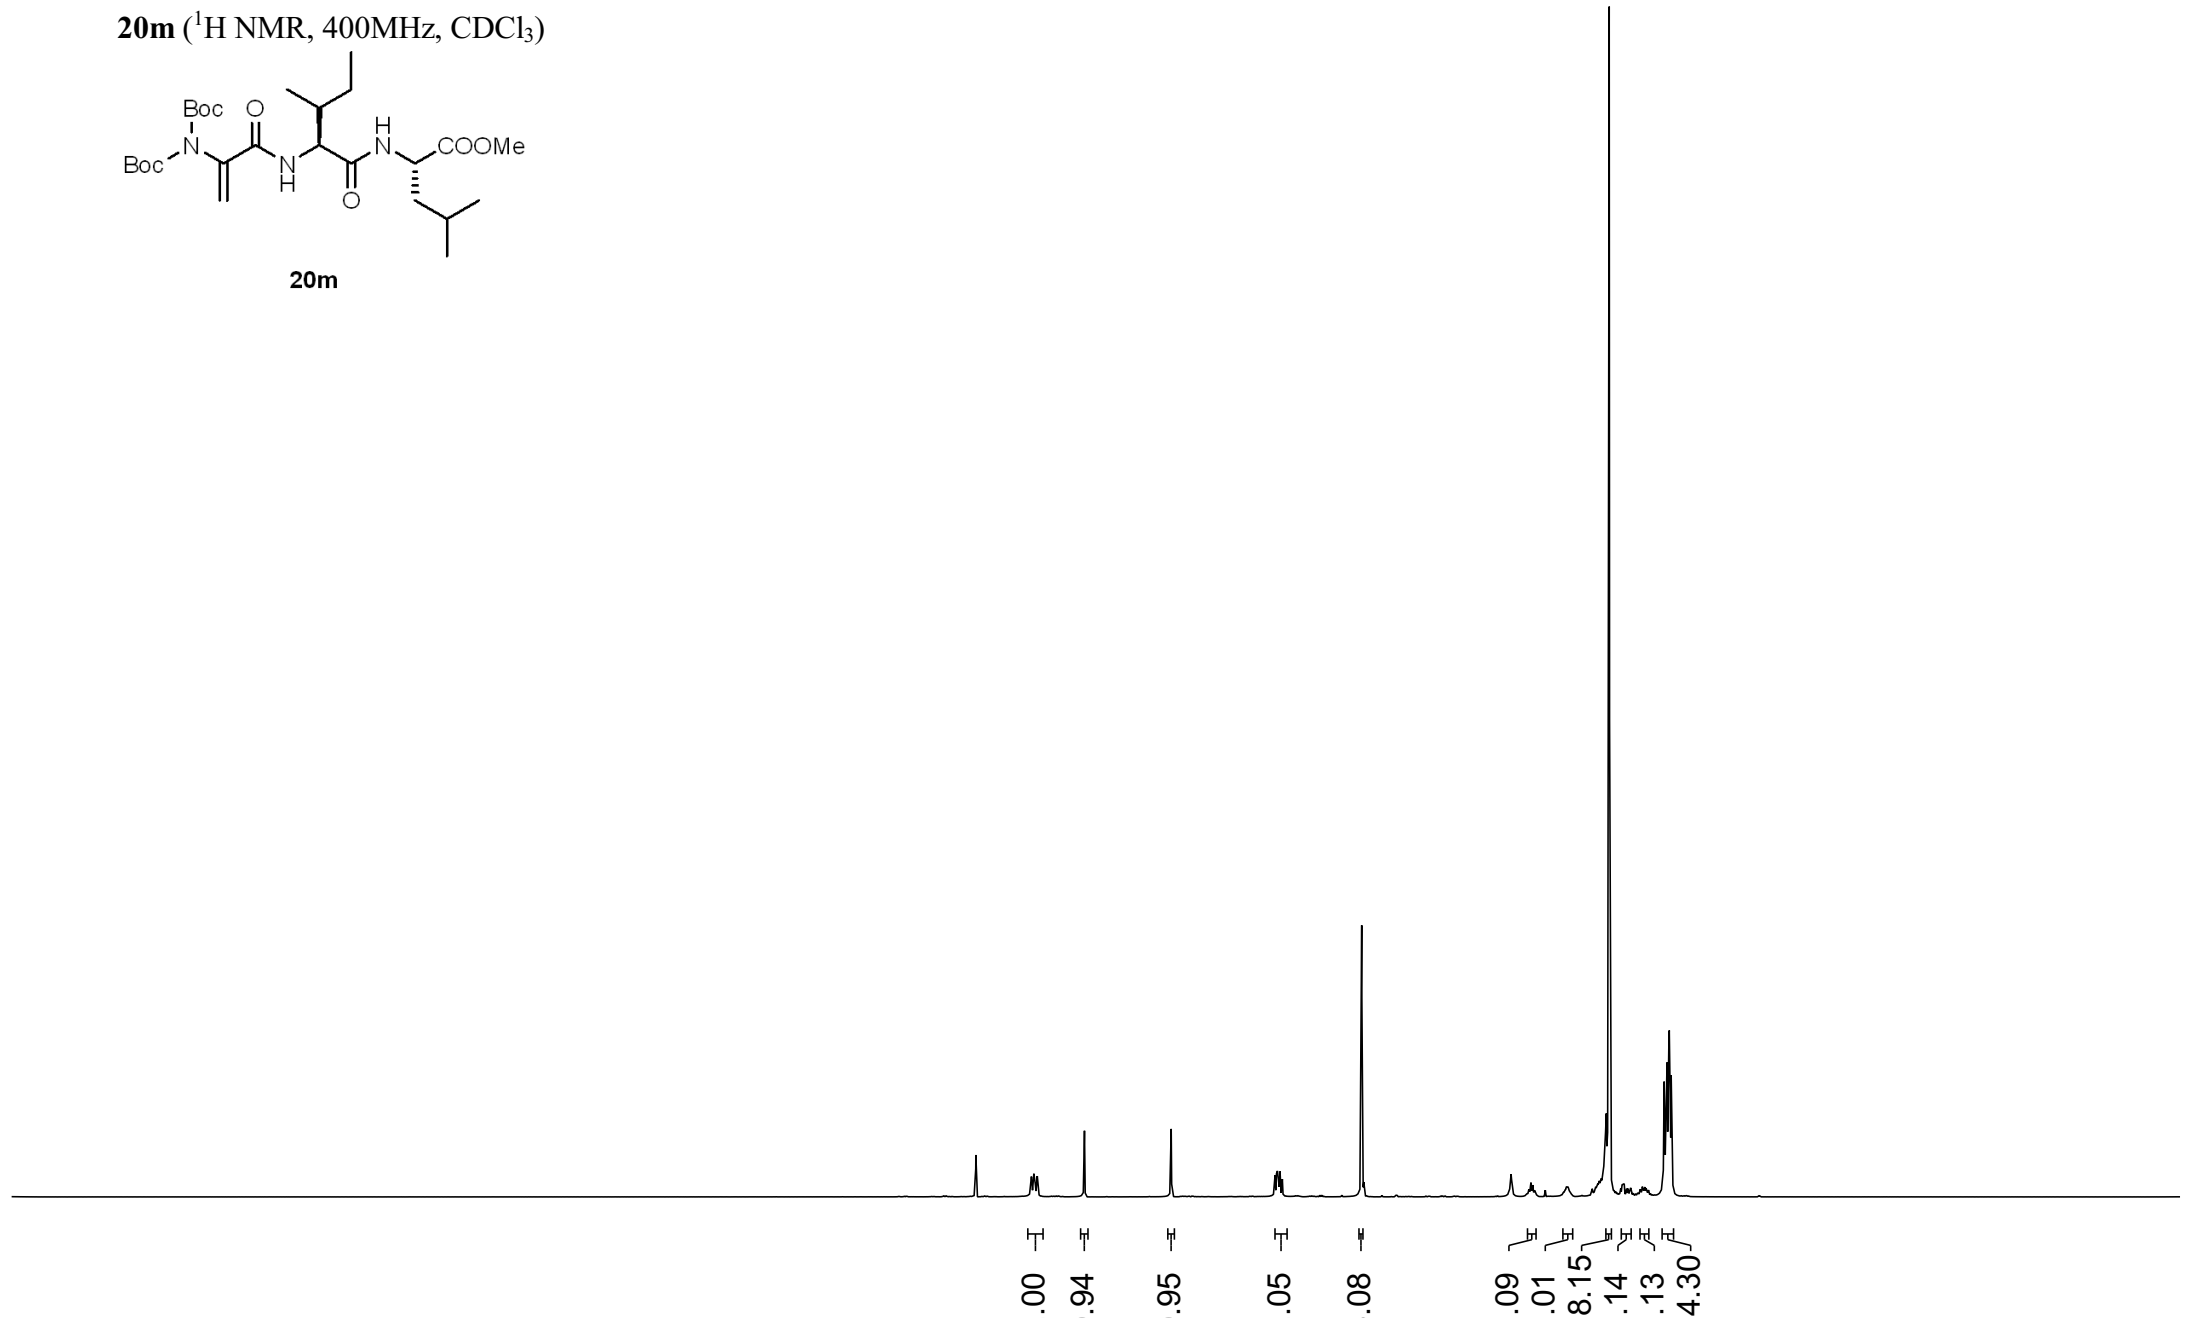

**20m** (<sup>13</sup>C NMR, 101MHz, CDCl<sub>3</sub>)

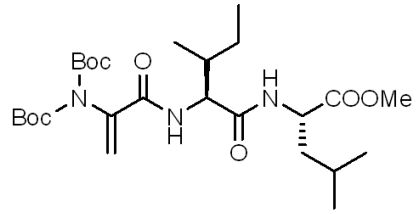

**20m**

172.16  
170.87  
170.79  
163.31  
— 150.66  
— 138.85  
— 121.81

83.81  
77.48  
77.16  
76.84  
— 67.87  
57.97  
57.39  
57.29  
52.35  
52.29  
52.26  
37.81  
31.11  
31.08  
28.28  
28.23  
27.90  
25.00  
19.11  
19.05  
18.02  
17.86  
15.51  
15.39  
11.39  
11.20

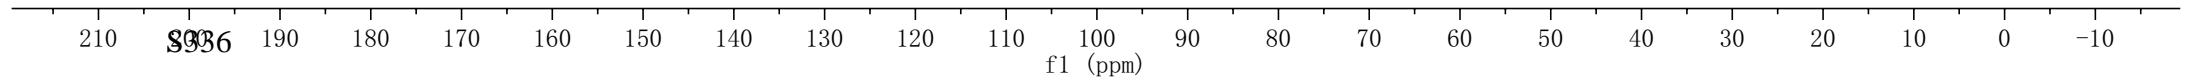

7.26  
6.65  
6.63  
6.22  
6.20  
6.18  
5.49  
4.61  
4.60  
4.59  
4.58  
4.57  
4.56  
4.38  
4.36  
4.36  
4.34  
3.73  
1.91  
1.90  
1.89  
1.89  
1.88  
1.87  
1.86  
1.85  
1.84  
1.58  
1.56  
1.55  
1.54  
1.54  
1.53  
1.52  
1.51  
1.51  
1.50  
1.49  
1.48  
1.48  
1.46  
1.41  
1.40  
0.95  
0.94  
0.92  
0.91  
0.89  
0.89

**20n** (<sup>1</sup>H NMR, 400MHz, CDCl<sub>3</sub>)

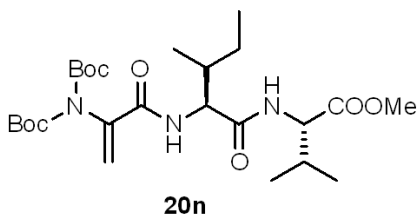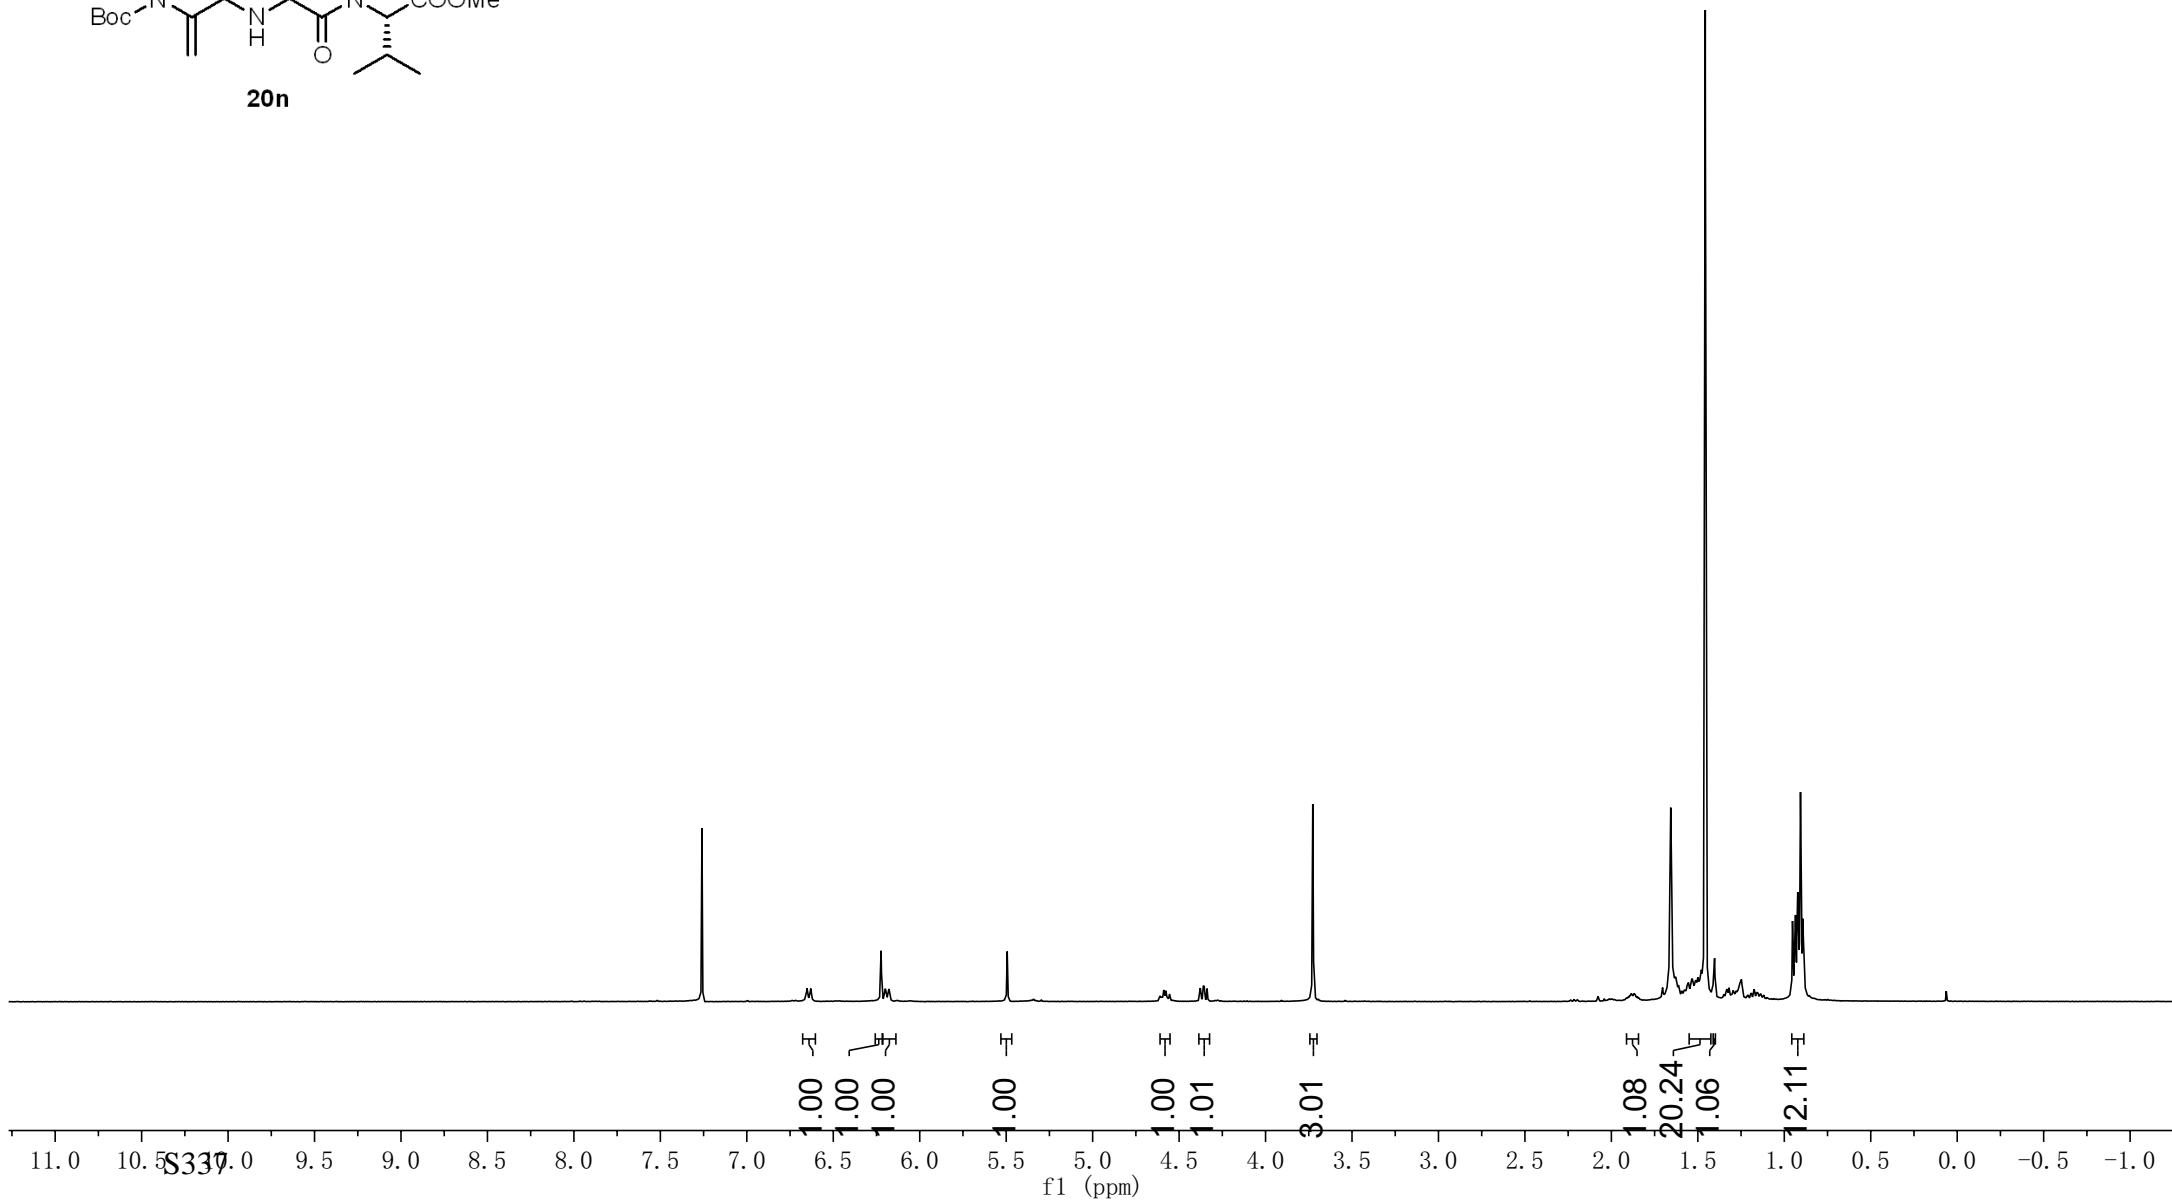

**20n** (<sup>13</sup>C NMR, 101MHz, CDCl<sub>3</sub>)

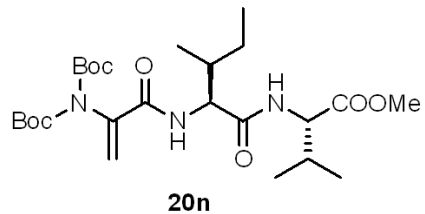

~173.11  
~170.61  
~163.35

—150.72

—138.88

—121.66

83.86  
77.48  
77.16  
76.84

~57.88  
~52.47  
~50.88

—41.53  
—37.87

27.94  
24.97  
24.86  
22.89  
21.98  
15.42  
11.36

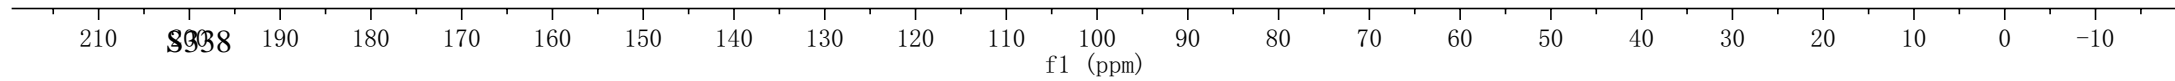

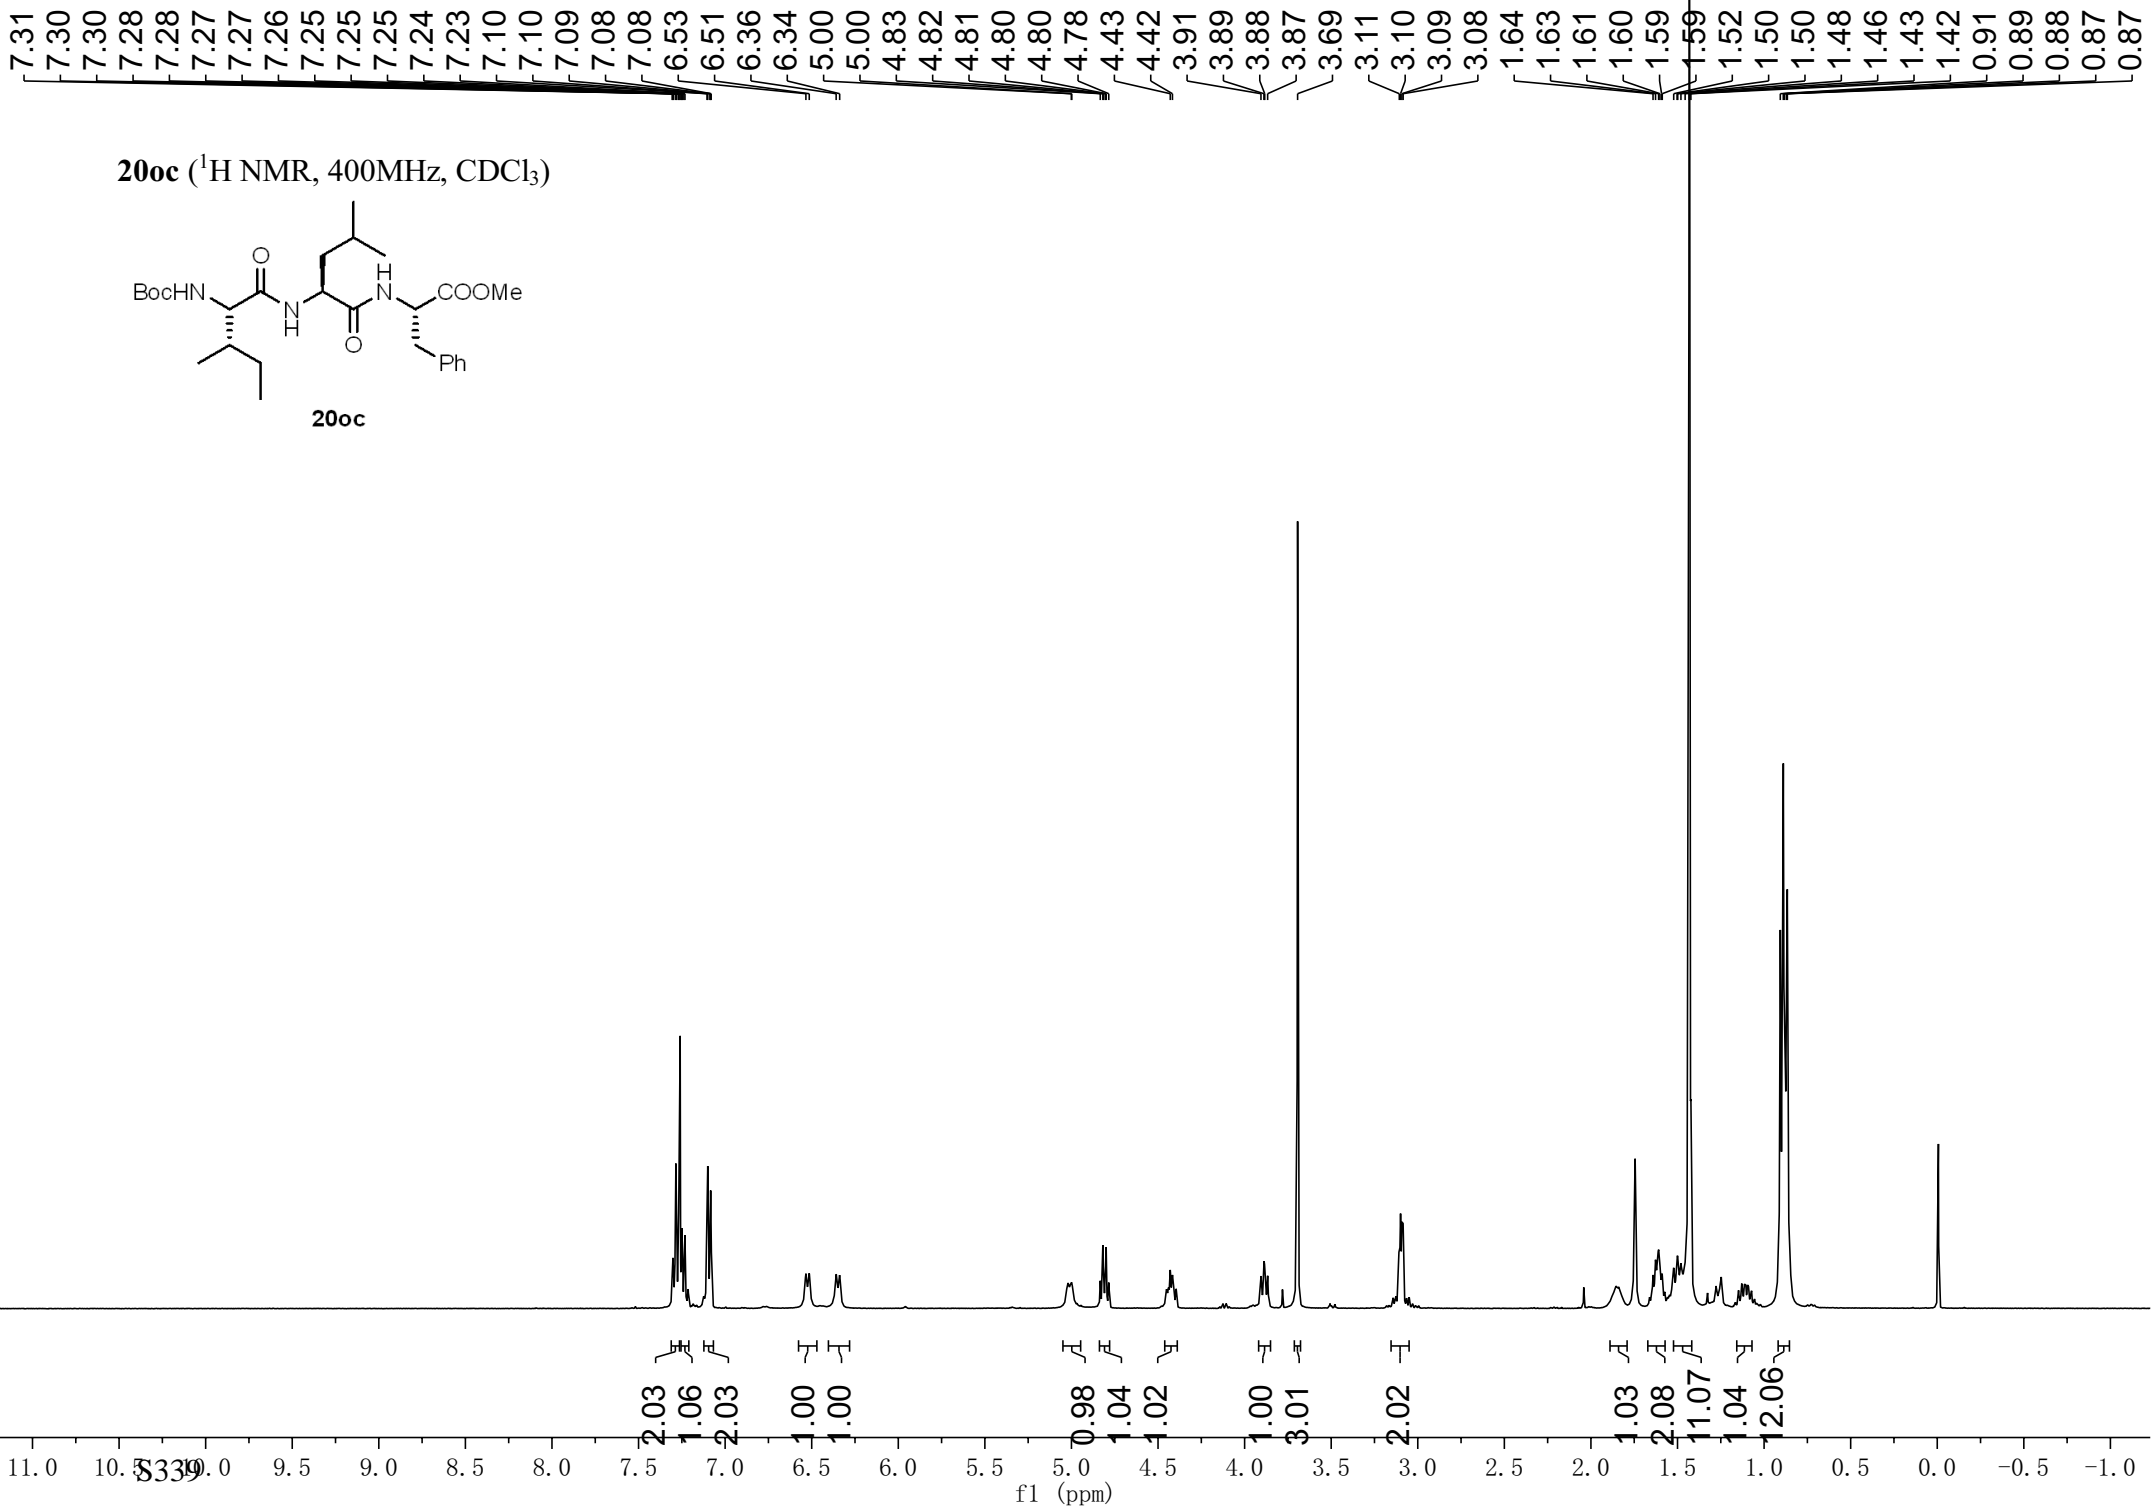

**20oc** (<sup>13</sup>C NMR, 101MHz, CDCl<sub>3</sub>)

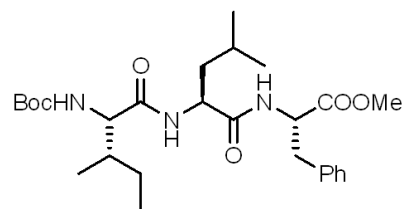

**20oc**

171.84  
171.71  
171.44

135.78  
129.37  
128.75  
127.31

80.22  
77.48  
77.16  
76.84

59.46  
53.43  
52.46  
51.75

41.20  
37.97  
36.92  
28.41  
24.87  
24.71  
23.01  
22.03  
15.71  
11.44

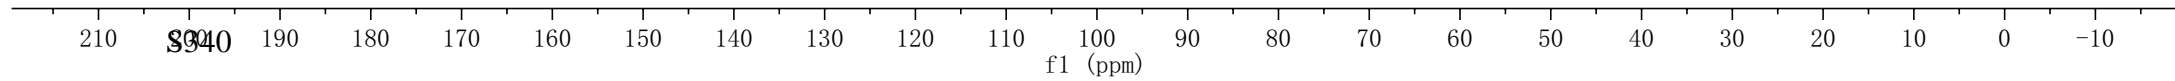

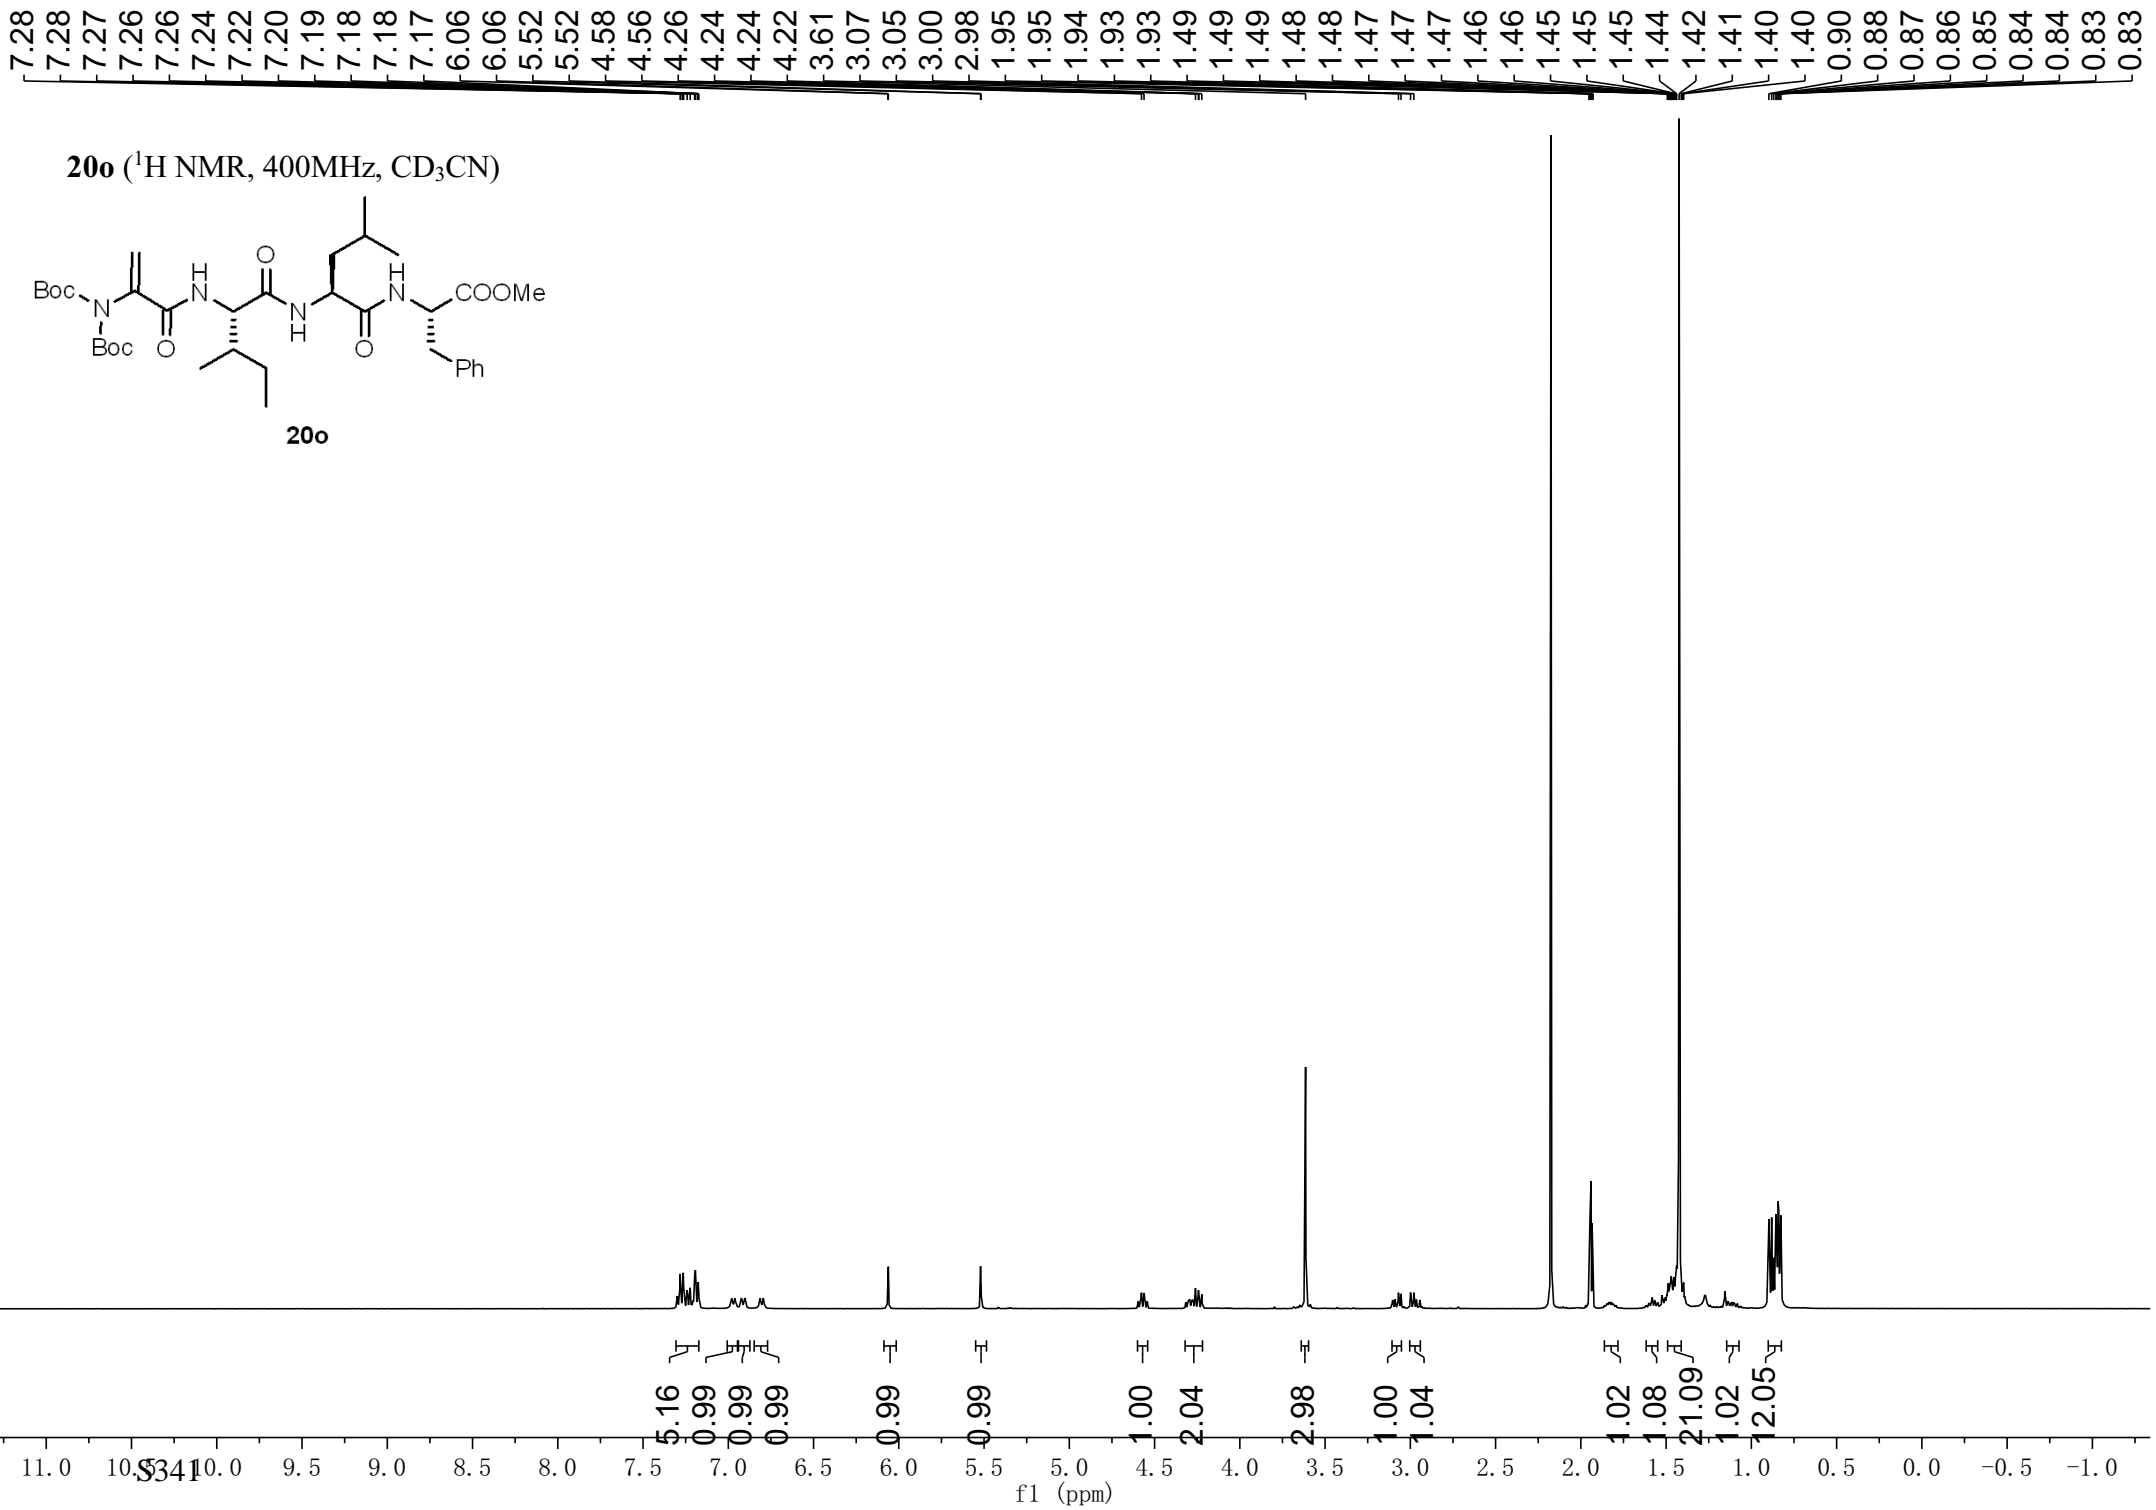



**20o** (<sup>13</sup>C NMR, 101MHz, CD<sub>3</sub>CN)

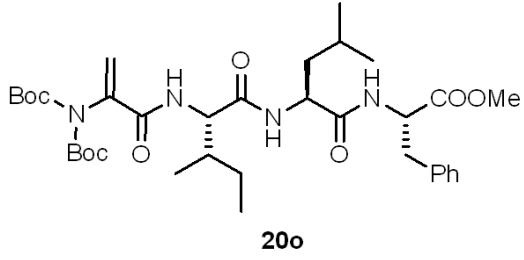

172.65  
172.59  
171.62  
164.56

151.71

140.05

137.74

130.22

129.31

127.69

121.01

118.26

83.86

58.78

54.64

52.59

52.44

41.52

38.02

37.91

27.97

25.57

25.24

23.18

21.84

15.89

11.41

1.67

1.46

1.26

1.05

0.84

0.61

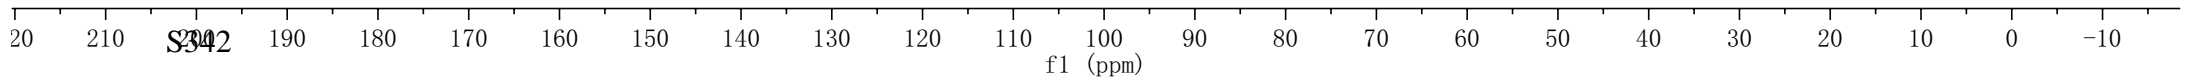

23 (<sup>1</sup>H NMR, 400MHz, CDCl<sub>3</sub>)

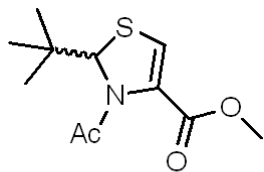

23

~7.26  
~7.11

~5.77

~3.74

~2.01

~0.83

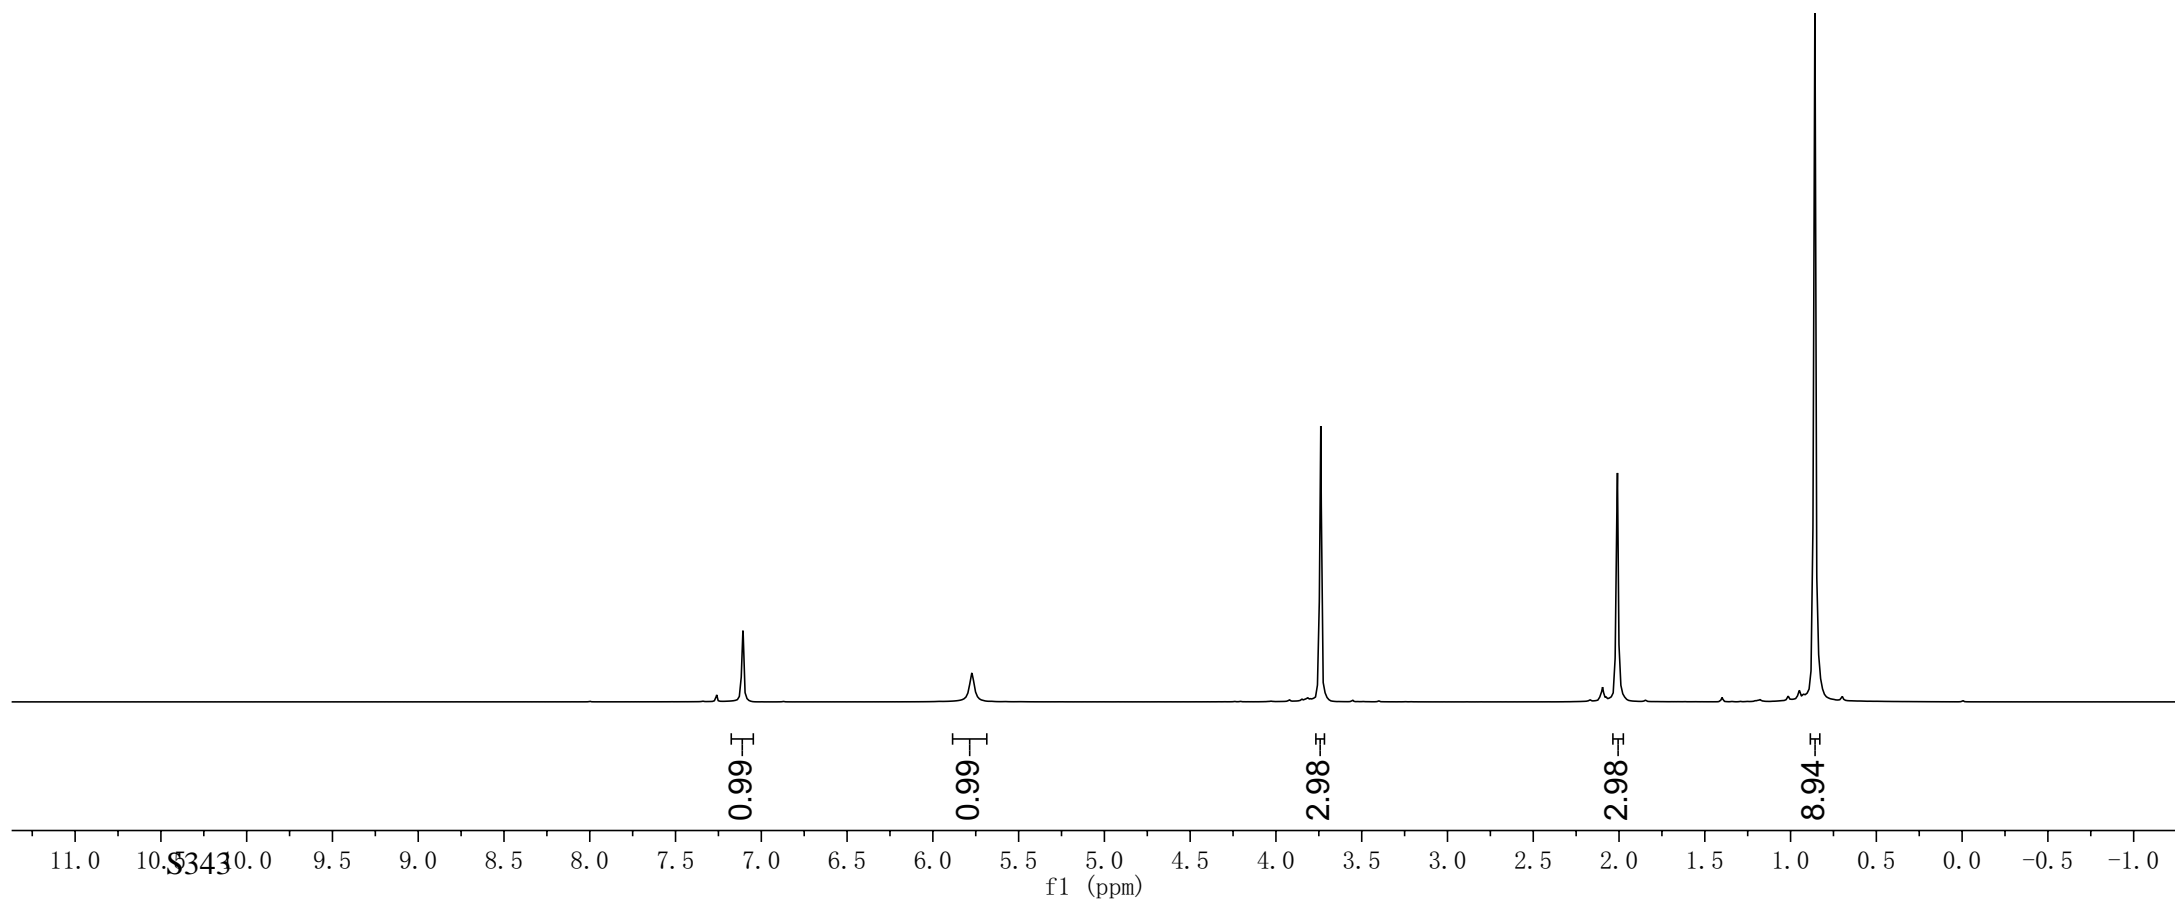

23 (<sup>13</sup>C NMR, 101MHz, CDCl<sub>3</sub>)

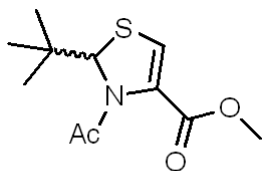

23

—173.21

—160.18

~131.44  
~129.52

78.34  
77.48  
77.16  
76.84

—52.21

—38.67

~24.37  
~22.33

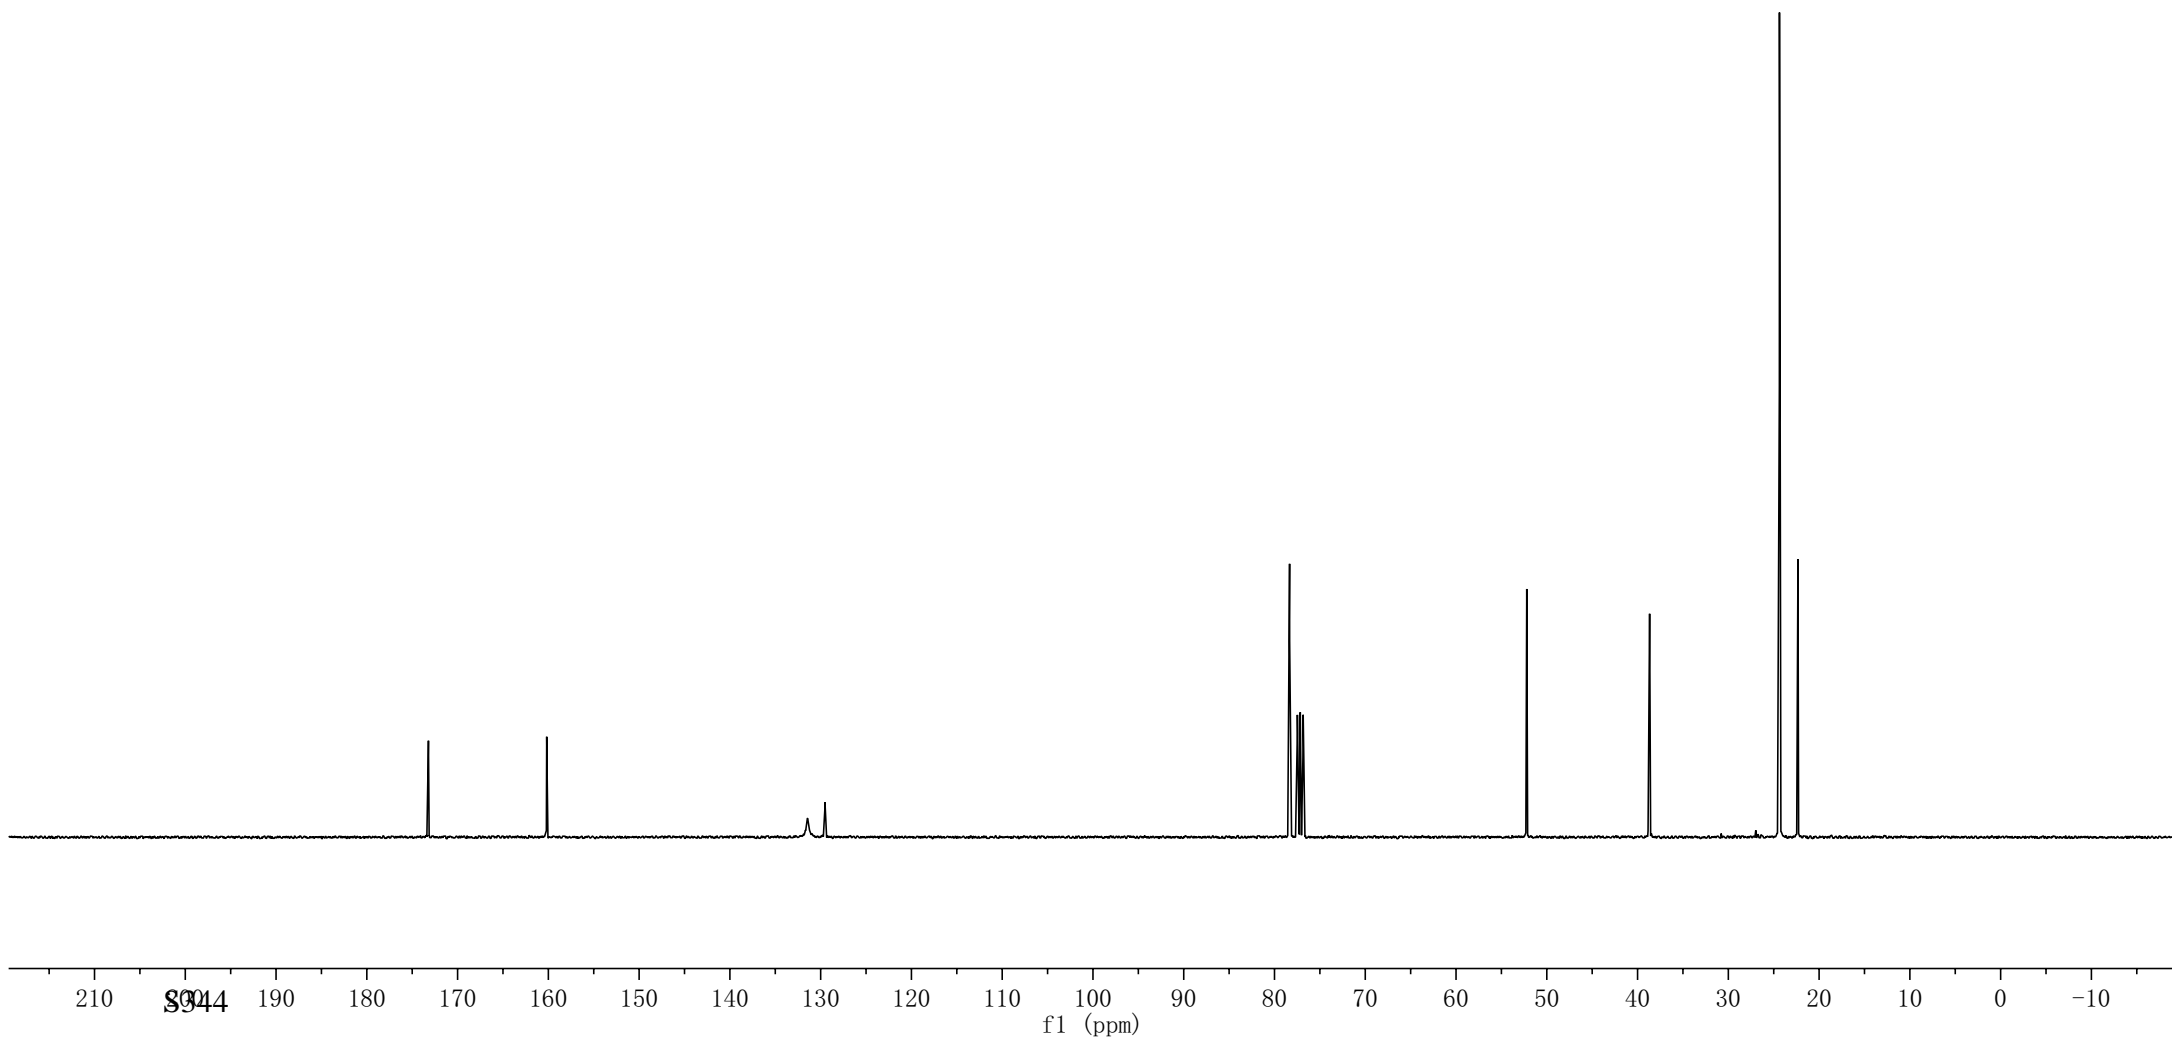

7.38  
7.38  
7.37  
7.36  
7.36  
7.26  
5.57  
5.22  
5.19  
5.18  
5.15  
5.15  
4.39  
4.38  
4.37  
4.36  
2.19  
1.91  
1.90  
1.88  
1.88  
1.75  
1.74  
1.71  
1.43  
1.42  
1.41  
1.41  
1.41  
1.40  
1.39  
1.39  
1.38  
1.38  
1.37  
1.37  
1.36  
1.35  
1.29  
1.28  
1.28  
1.27  
1.27  
1.26  
1.26  
1.25  
1.03  
0.96  
0.94  
0.93  
0.91  
0.90  
0.89  
0.87  
0.86  
0.85  
0.81  
0.81  
0.78

**22b** ( $^1\text{H}$  NMR, 400MHz,  $\text{CDCl}_3$ )

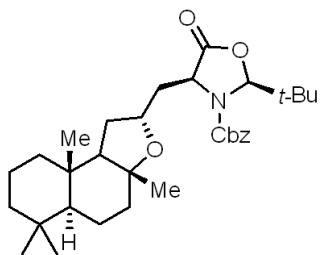

**22b**

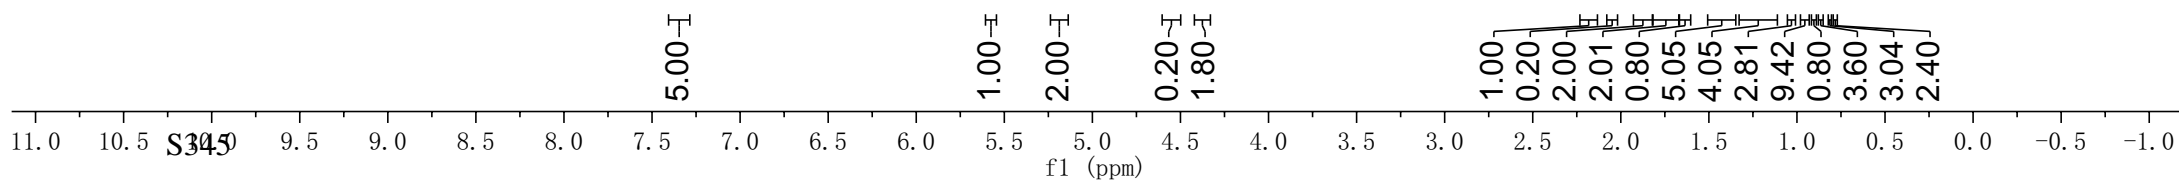

**22b** ( $^{13}\text{C}$  NMR, 101MHz,  $\text{CDCl}_3$ )

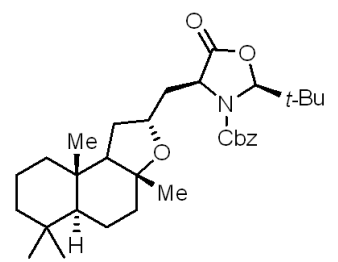

**22b**

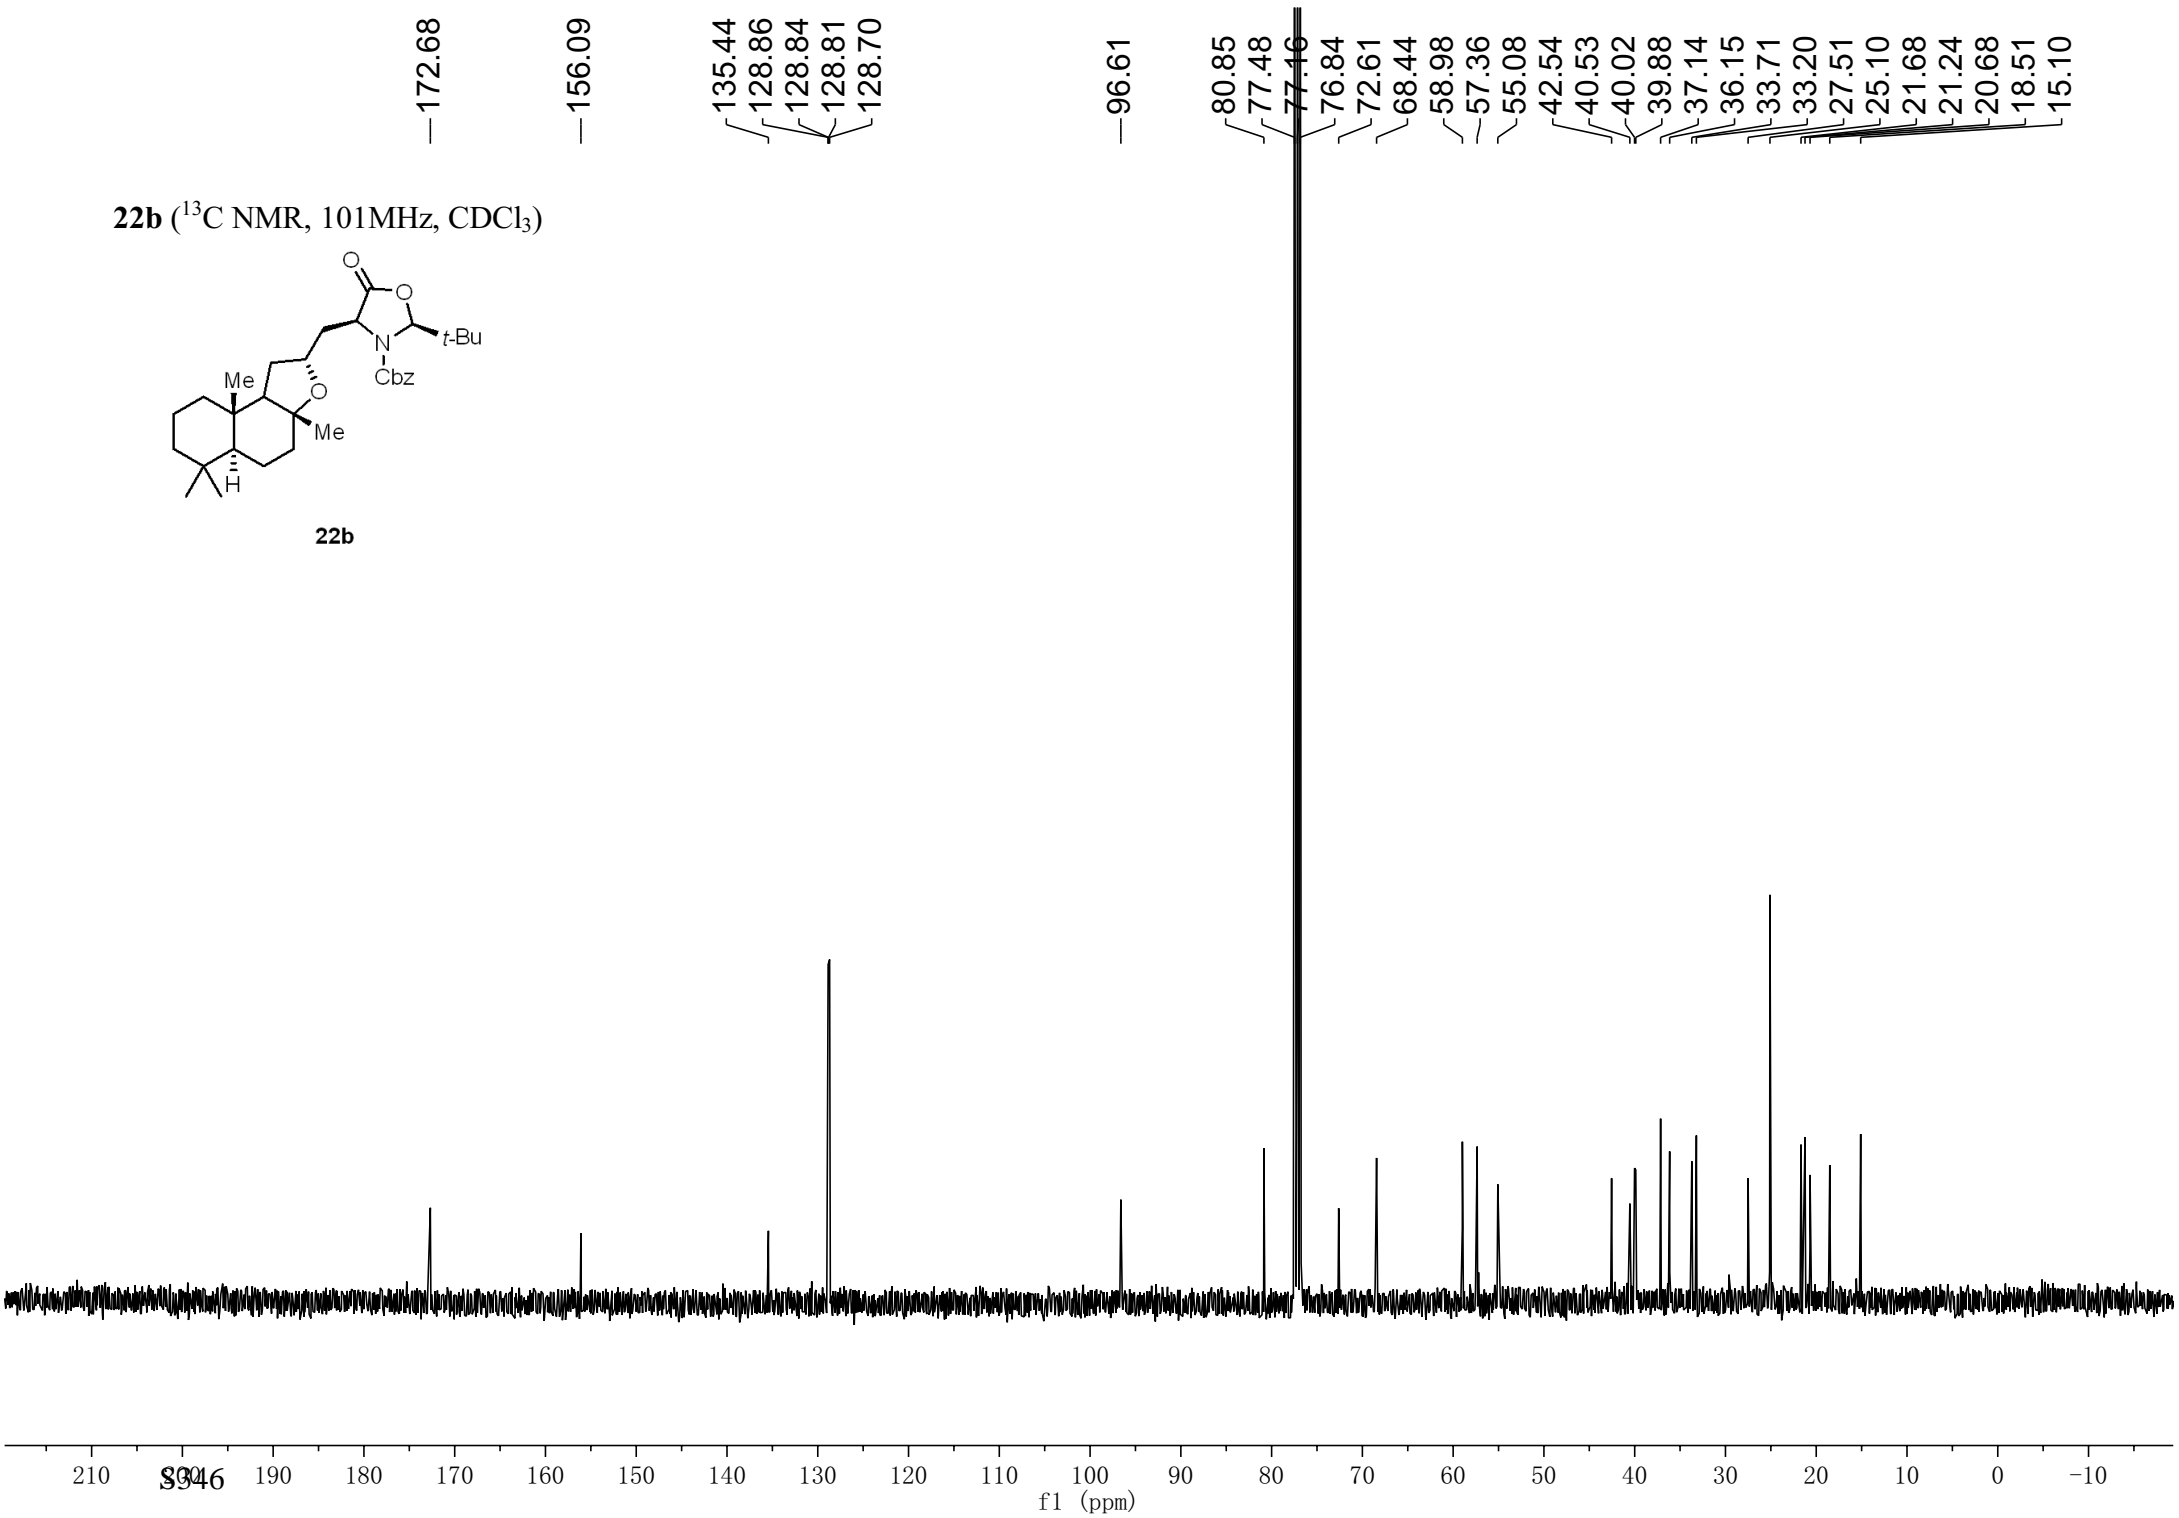

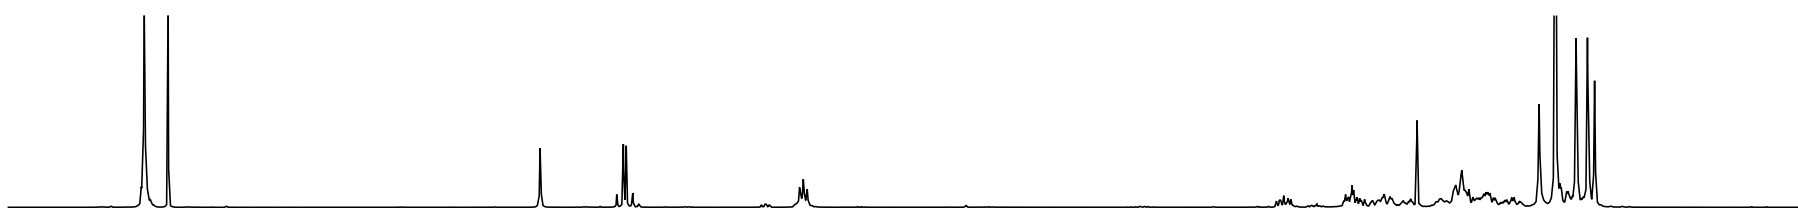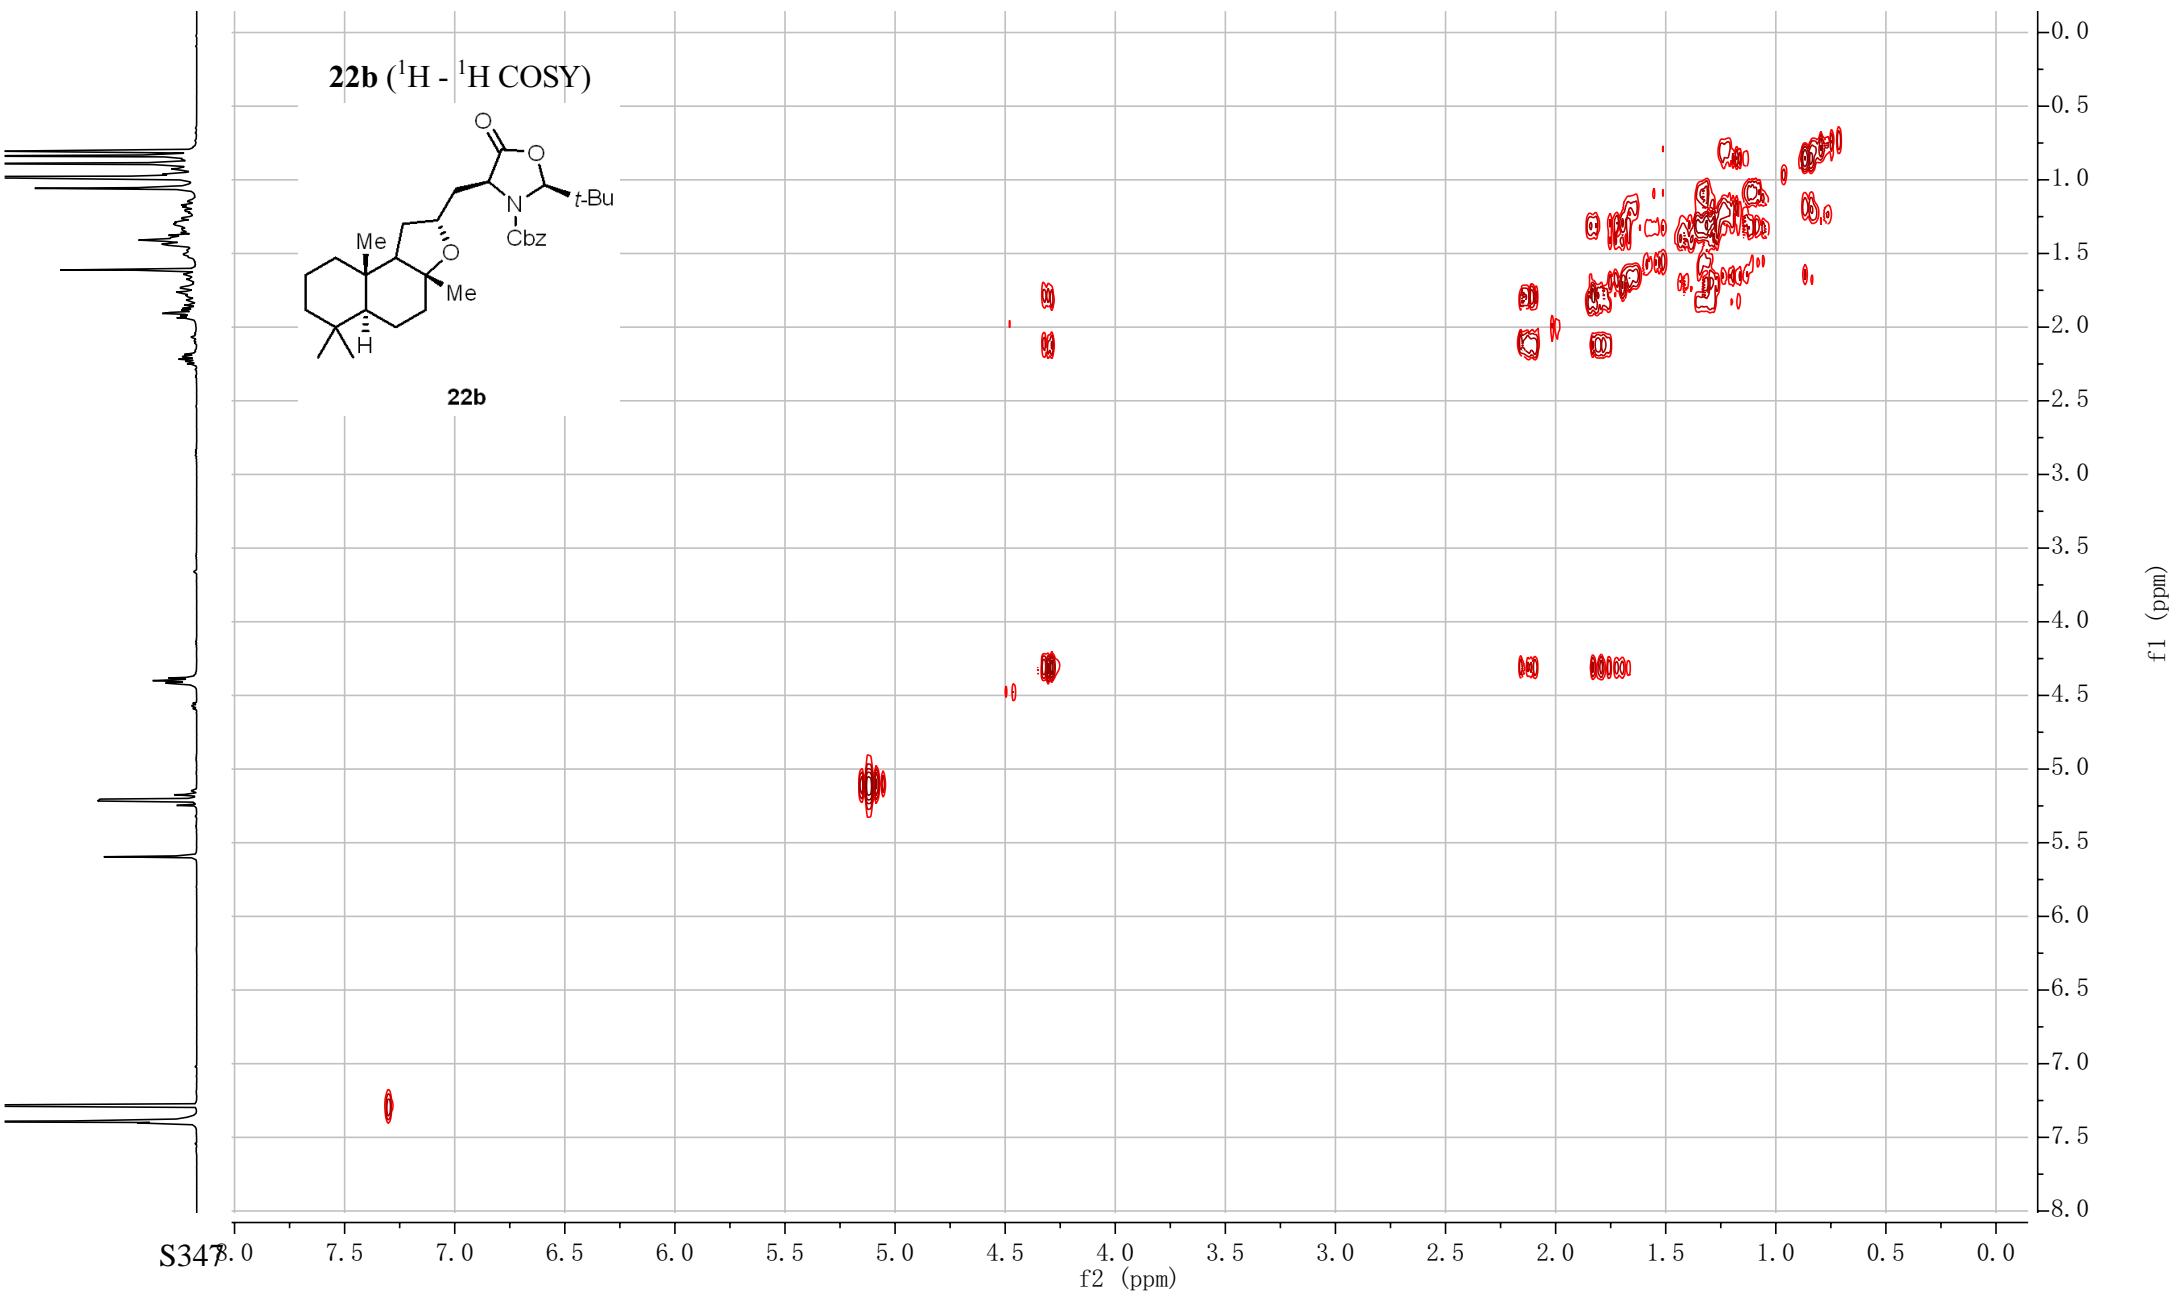

S347

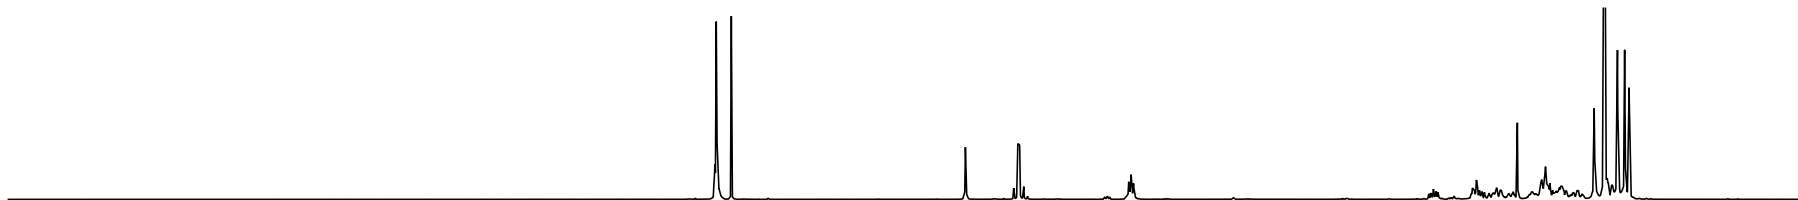

**22b** (<sup>1</sup>H - <sup>13</sup>C Coupled HSQC)

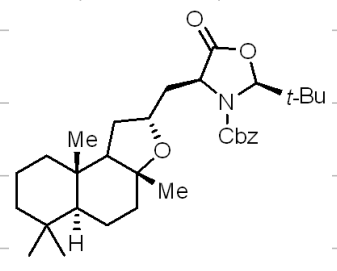

**22b**

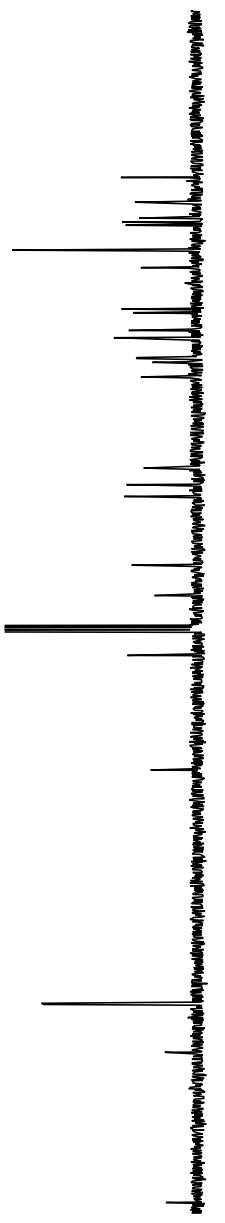

S348

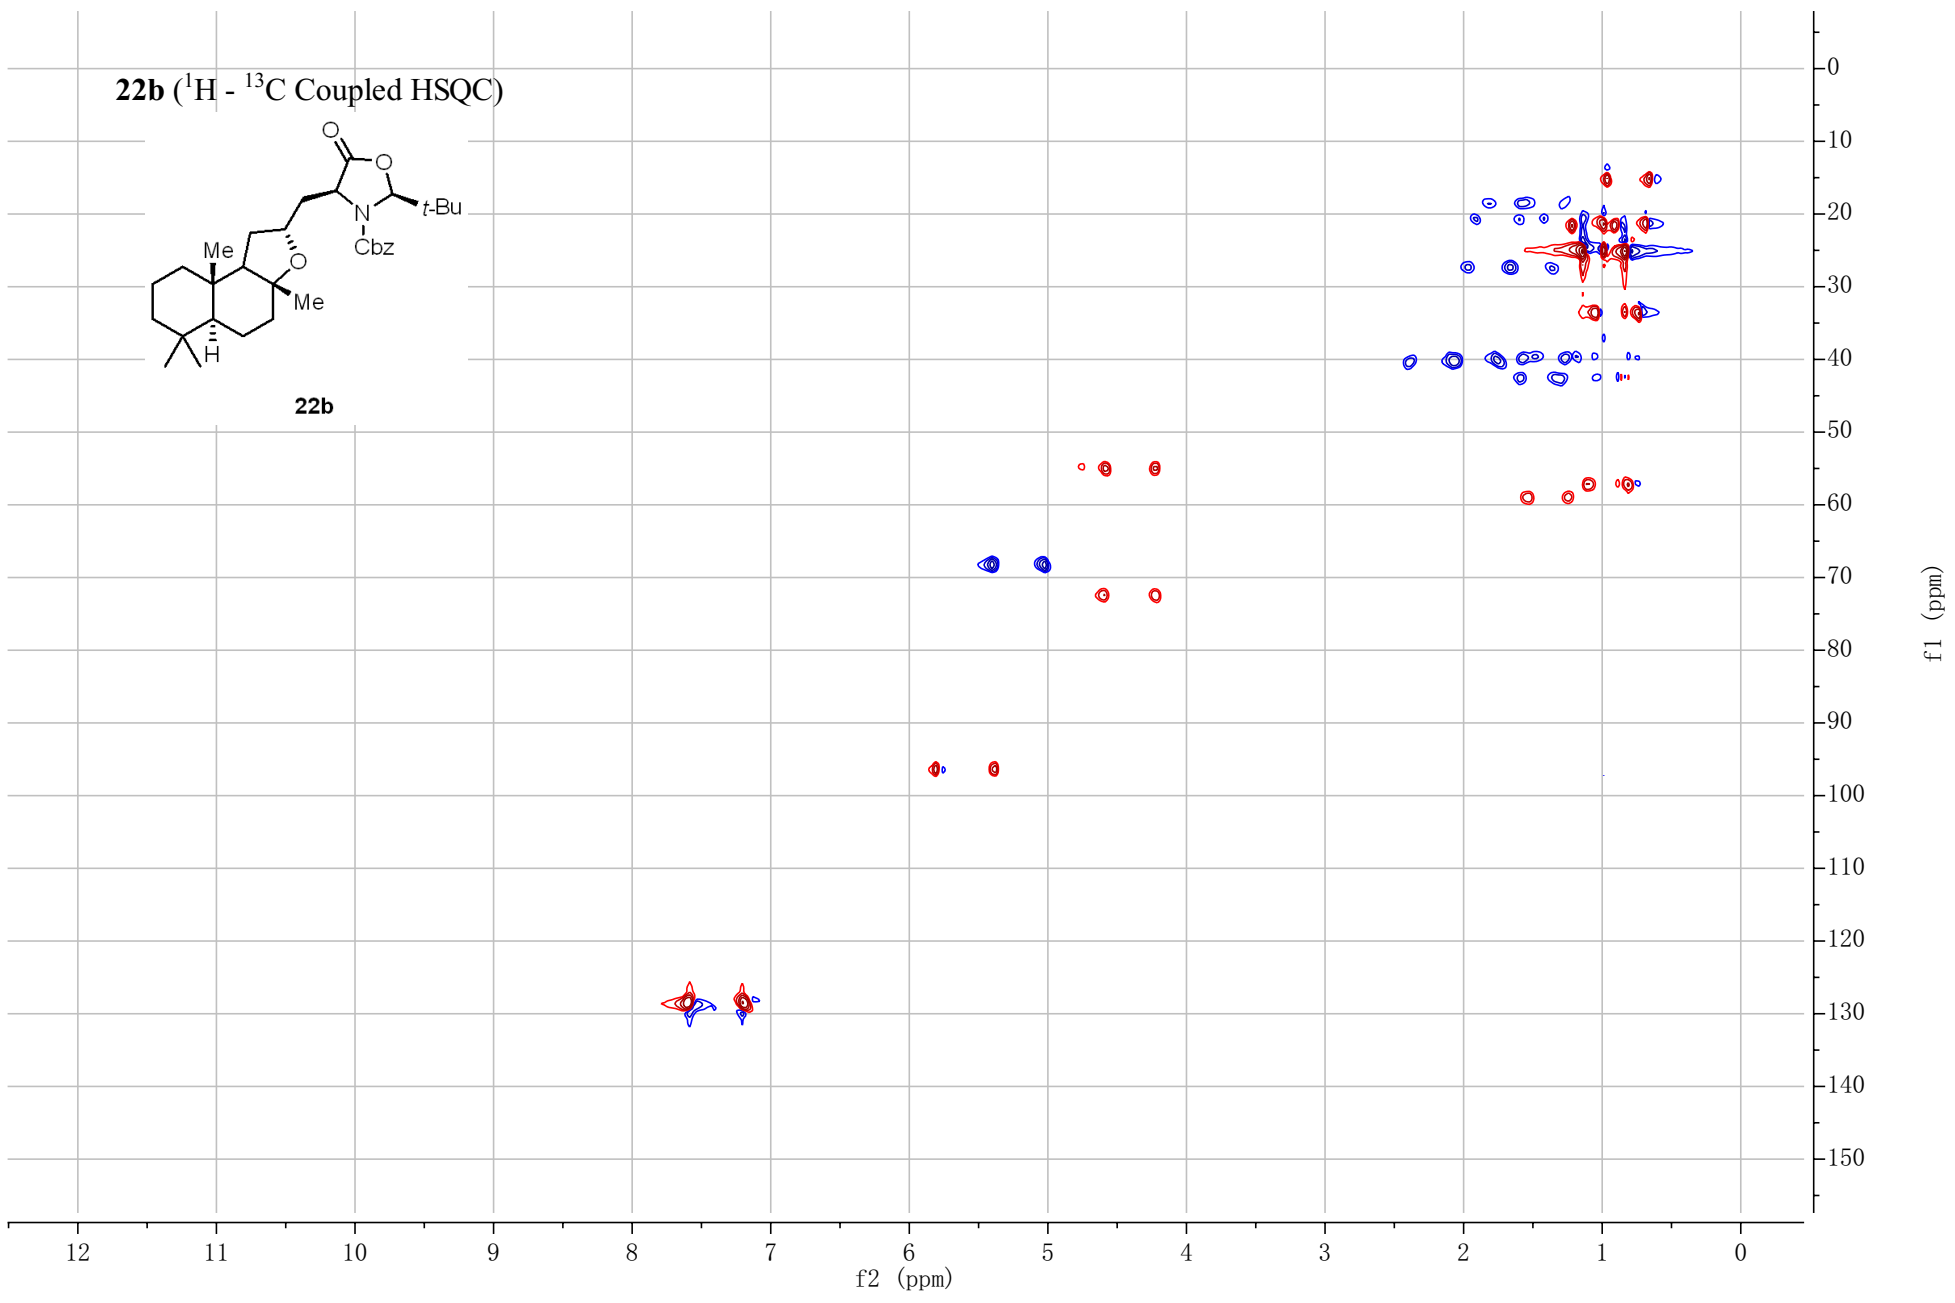

f2 (ppm)

f1 (ppm)

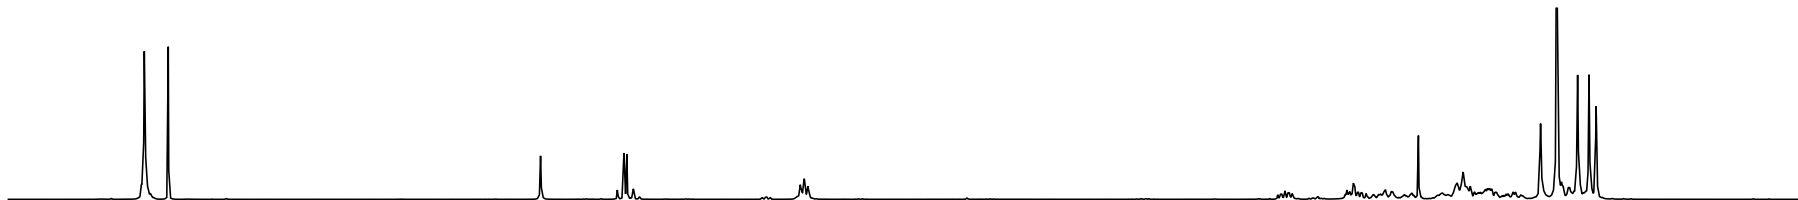

22b (<sup>1</sup>H - <sup>13</sup>C HSQC)

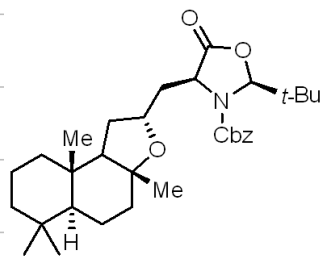

22b

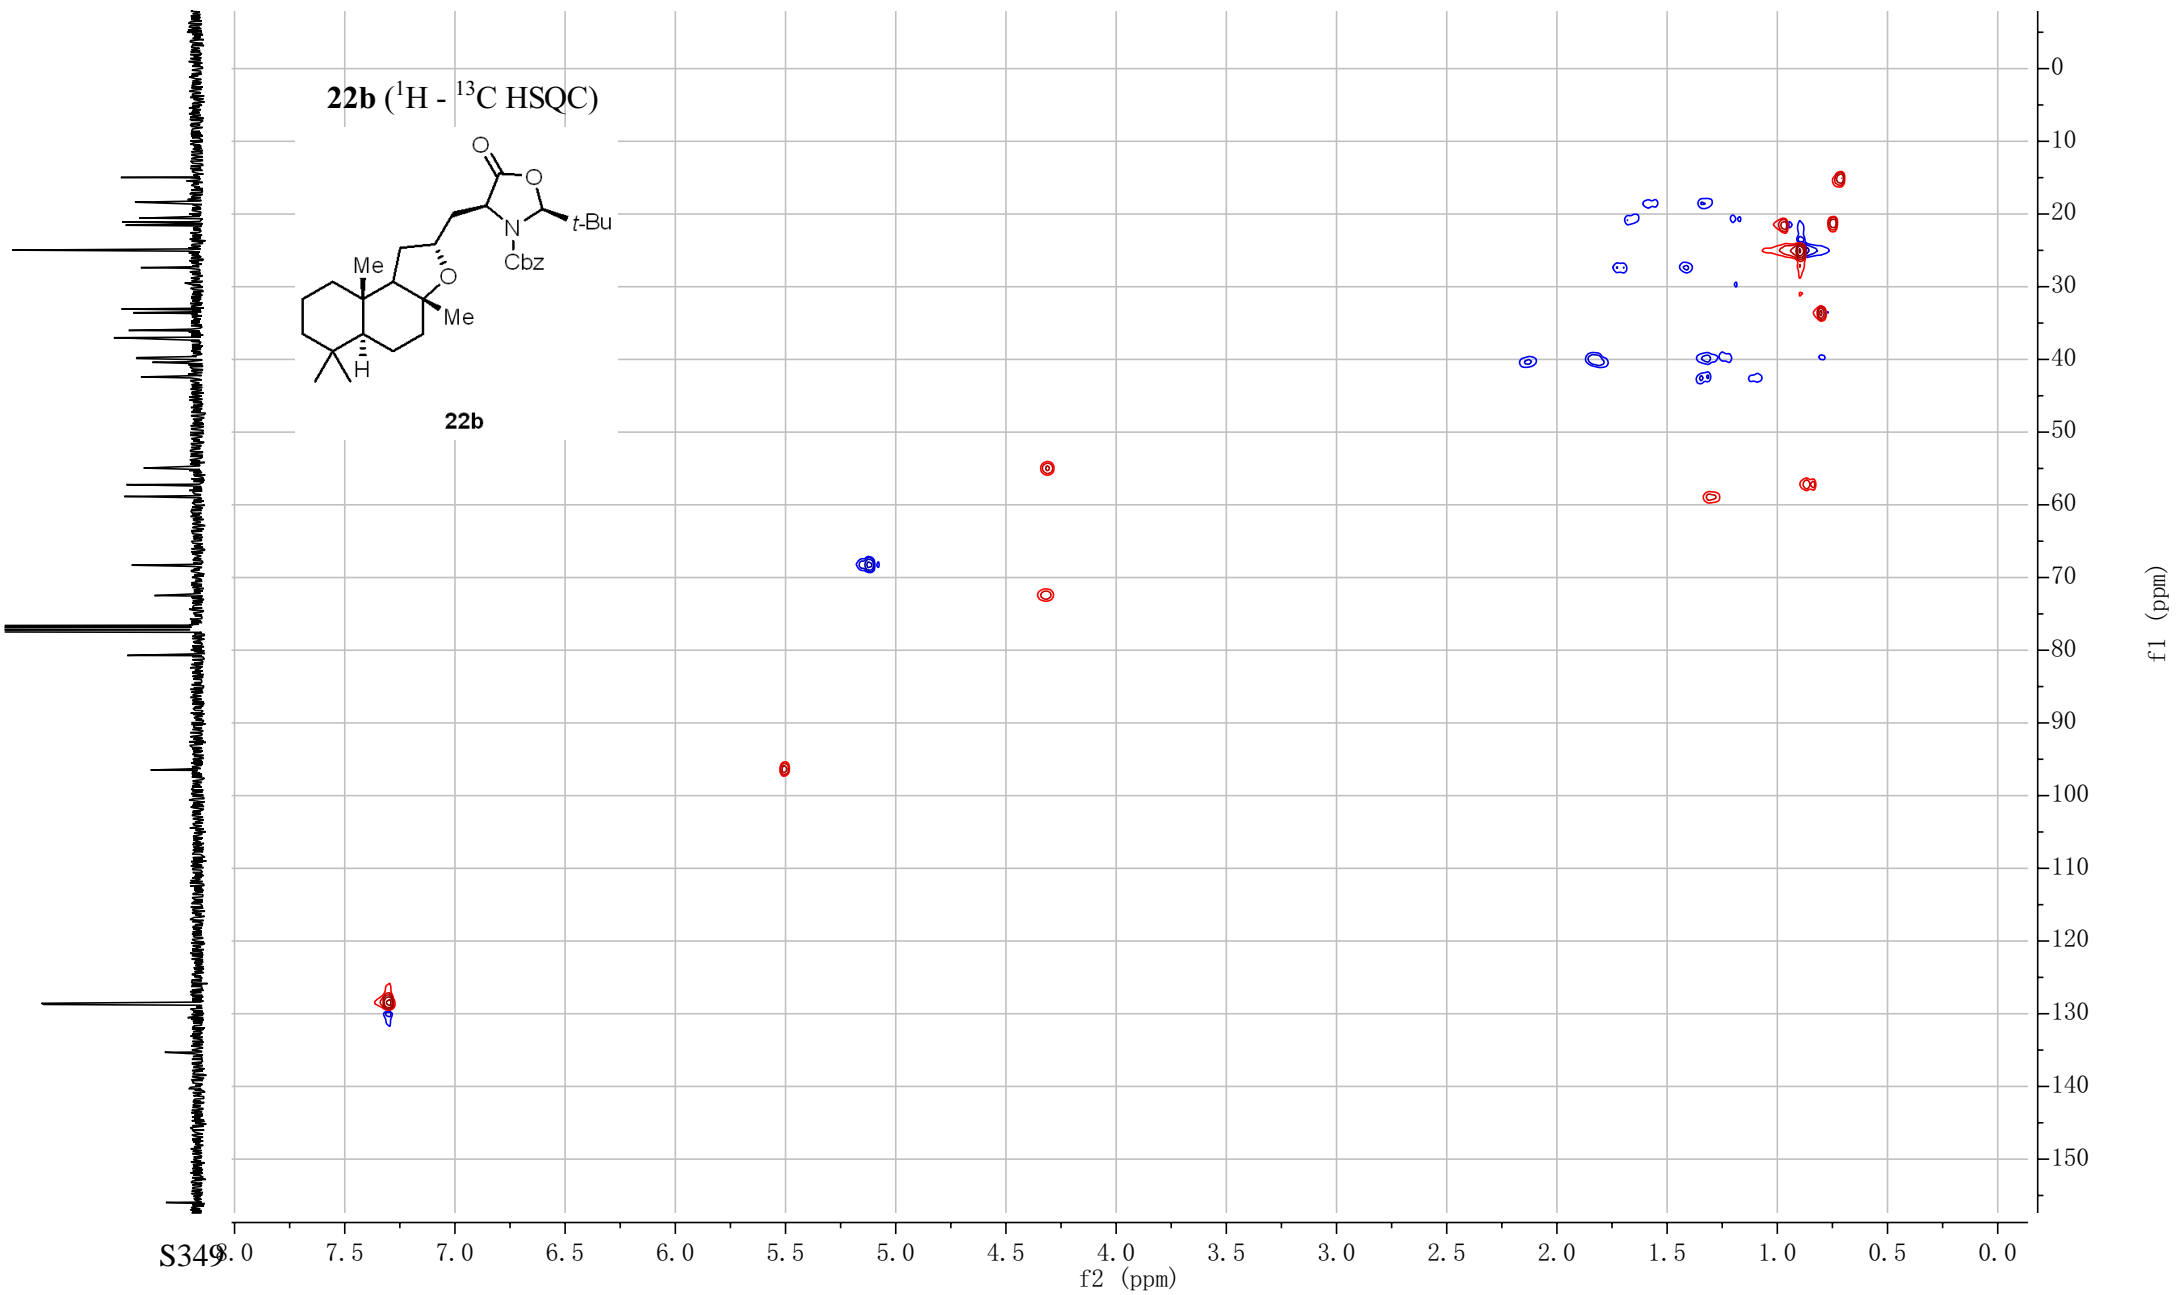

S349



5.41  
5.17  
5.16  
4.79  
4.79  
4.78  
4.77  
4.75  
4.75  
4.74  
4.73  
4.26  
4.26  
4.25  
4.25  
4.20  
4.18  
4.16  
4.15  
4.15  
4.14  
4.13  
4.12  
4.11  
4.09  
4.08  
4.08  
4.07  
4.06  
4.04  
3.97  
3.96  
3.93  
3.92  
3.91  
3.90  
3.81  
3.80  
3.79  
3.78  
3.77  
3.72  
3.67  
2.51  
2.50  
2.50  
2.50  
2.49  
2.20  
2.11  
1.39  
1.32  
1.31  
1.27  
1.26  
1.25  
1.23  
0.97  
0.82

24 (<sup>1</sup>H NMR, 400MHz, DMSO-d<sub>6</sub>)

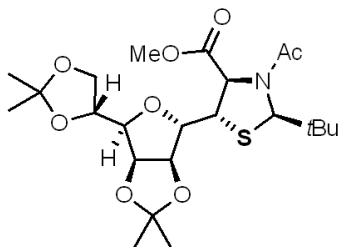

24

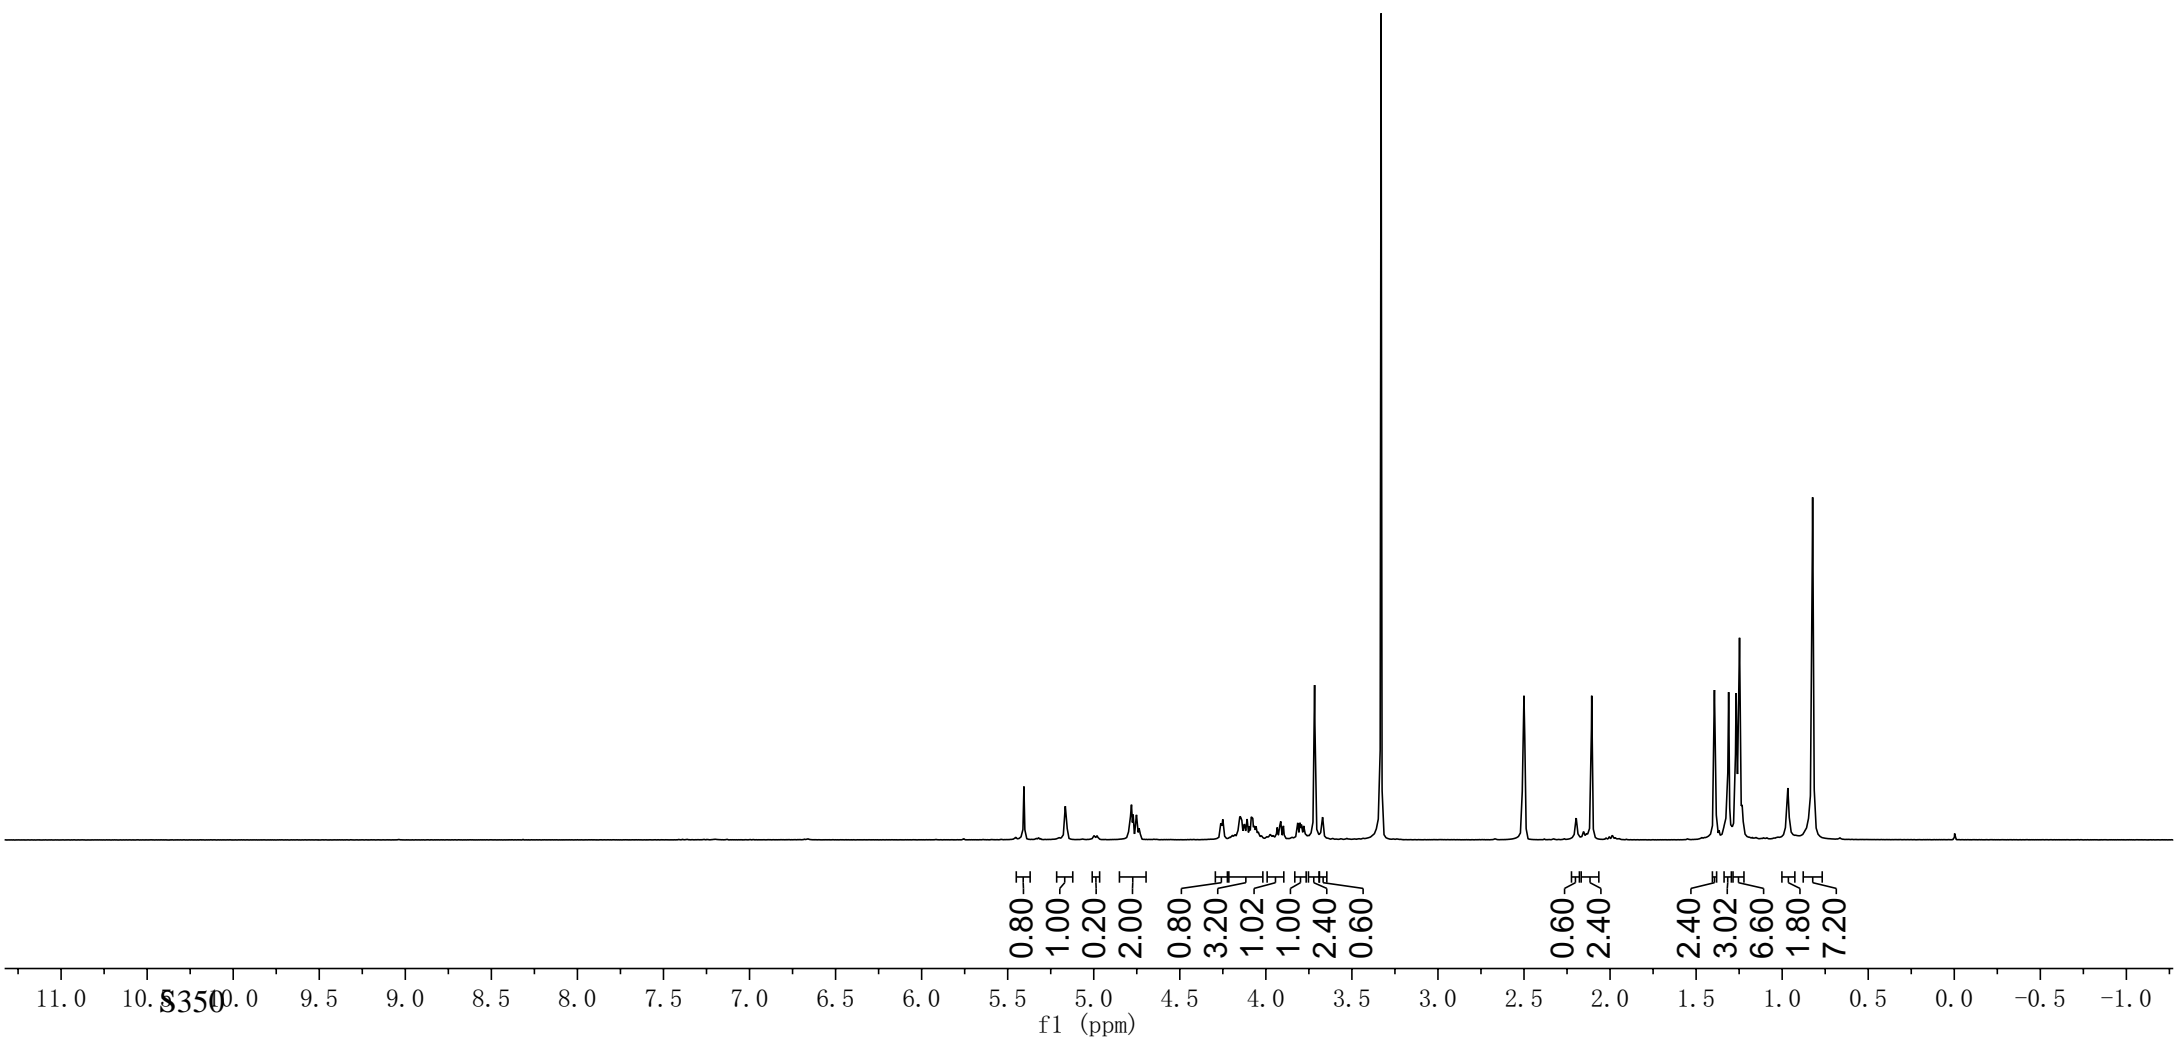

24 (<sup>13</sup>C NMR, 101MHz, DMSO-*d*<sub>6</sub>)

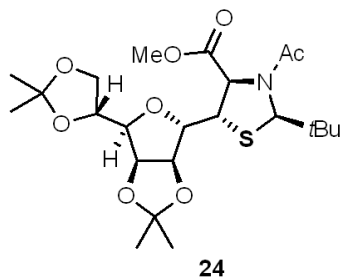

171.50  
170.42

111.77  
108.10

86.61  
84.06  
83.31  
80.89  
72.82  
71.93  
67.19  
66.08

52.71  
49.94  
40.15  
39.94  
39.73  
39.52  
39.31  
39.10  
38.89  
37.84  
26.58  
26.55  
26.27  
25.23  
24.62  
23.39

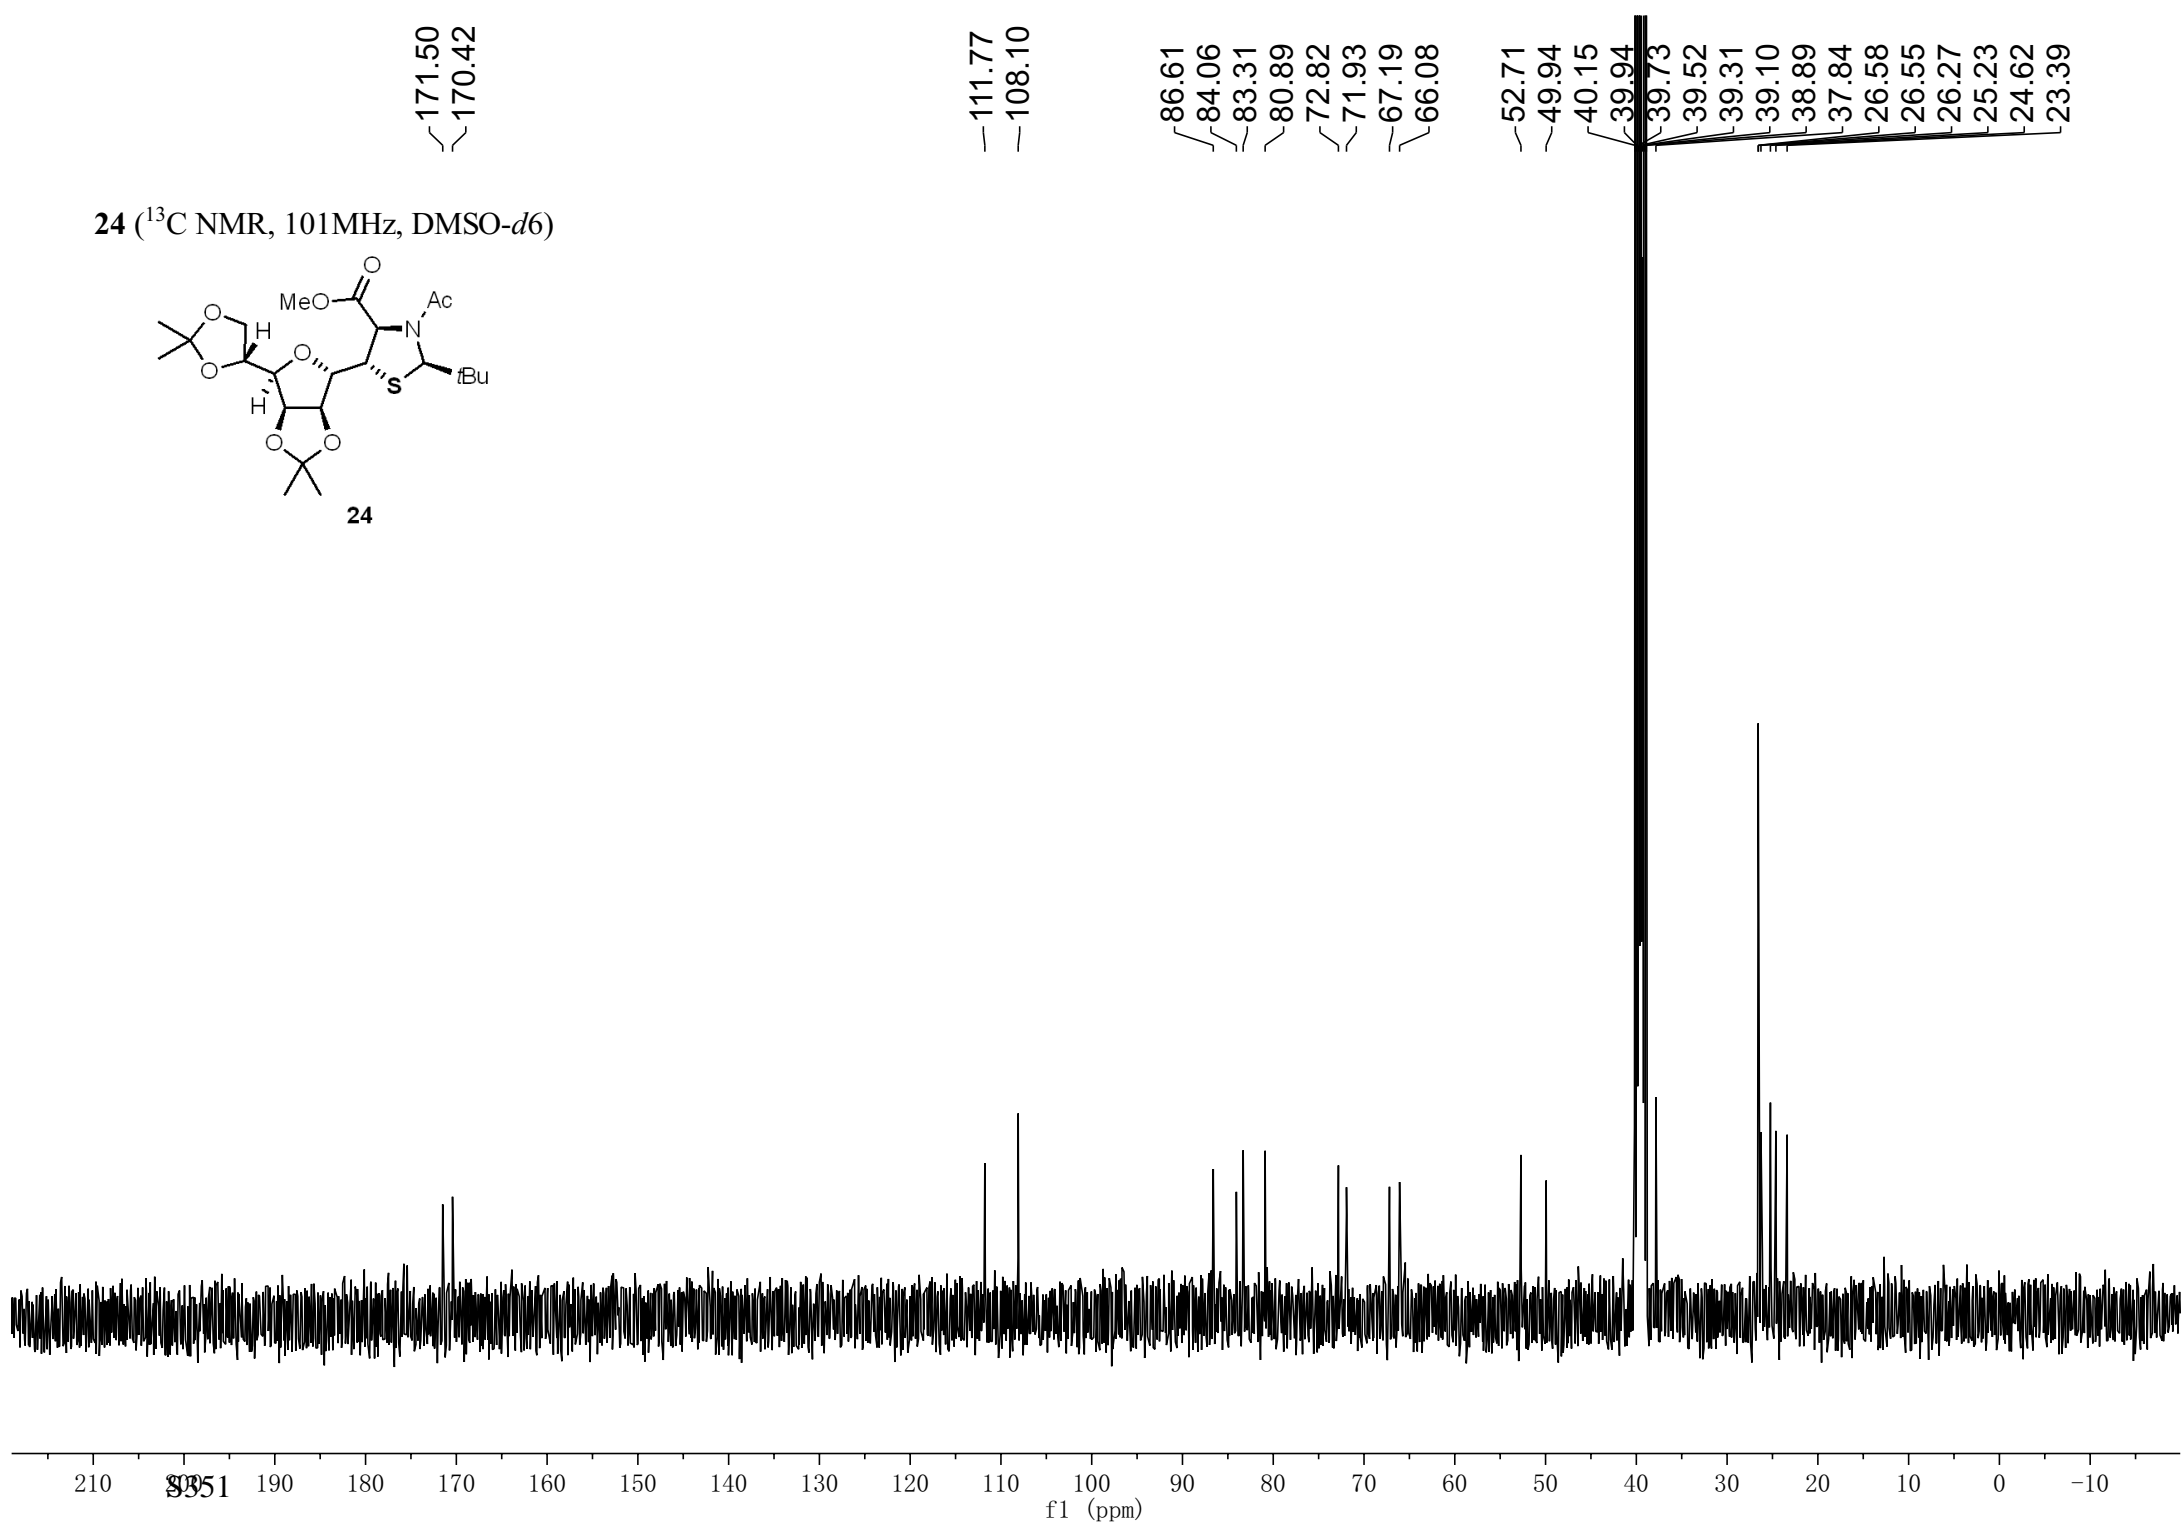

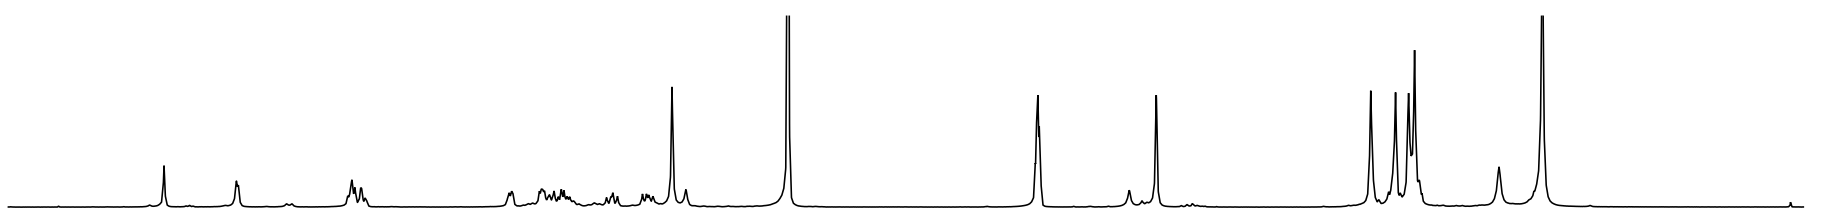

24 (<sup>1</sup>H - <sup>1</sup>H COSY)

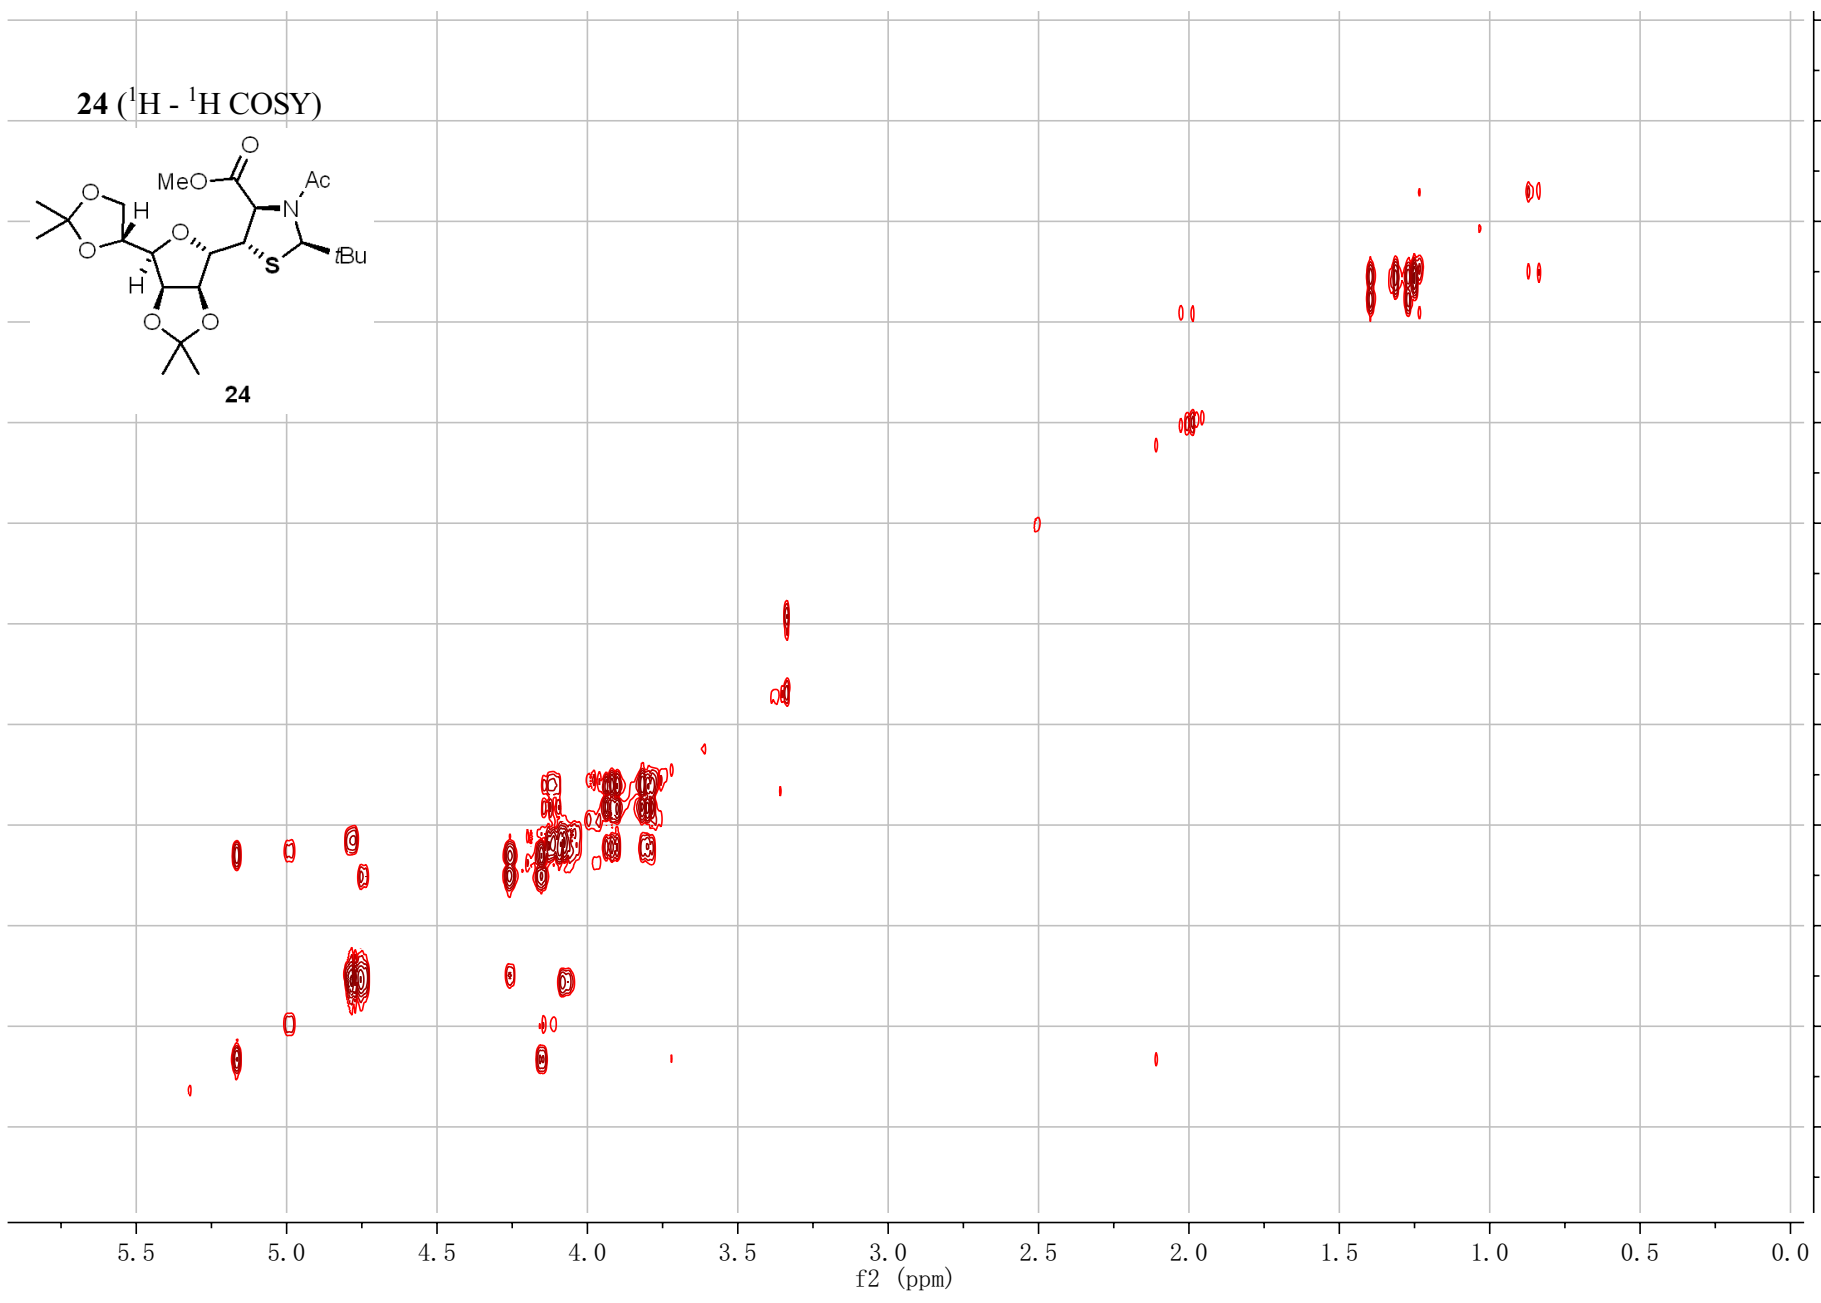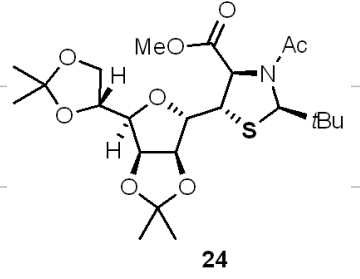

S352

f1 (ppm)

f2 (ppm)

24 (<sup>1</sup>H - <sup>13</sup>C Coupled HSQC)

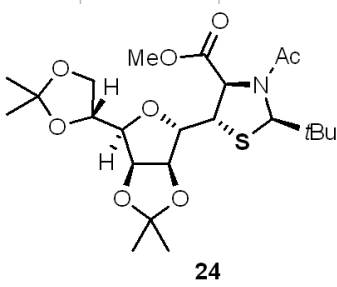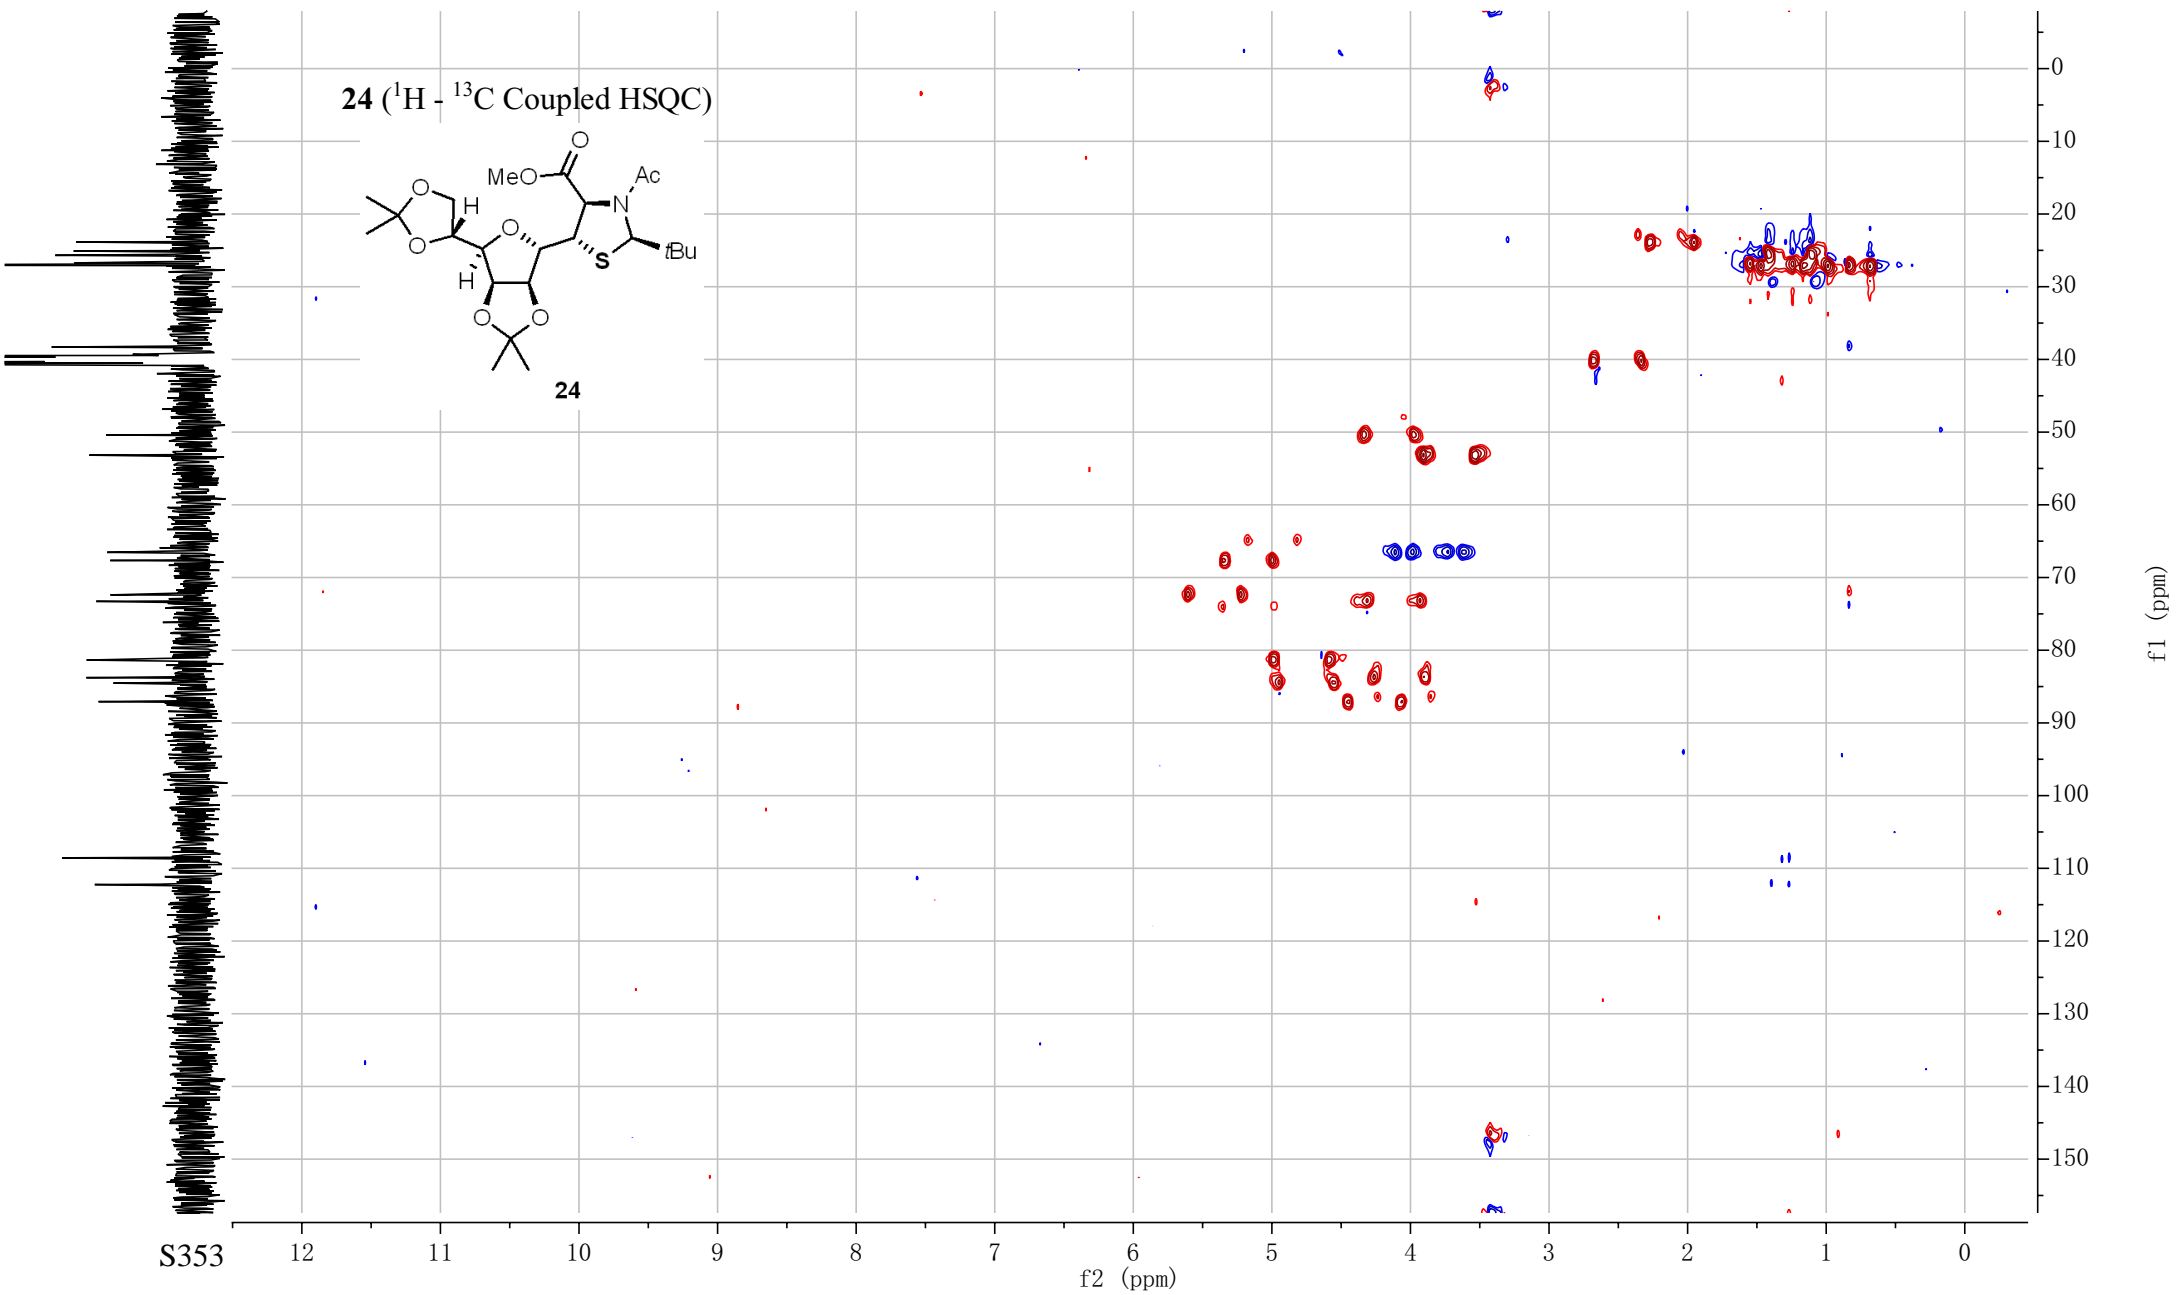

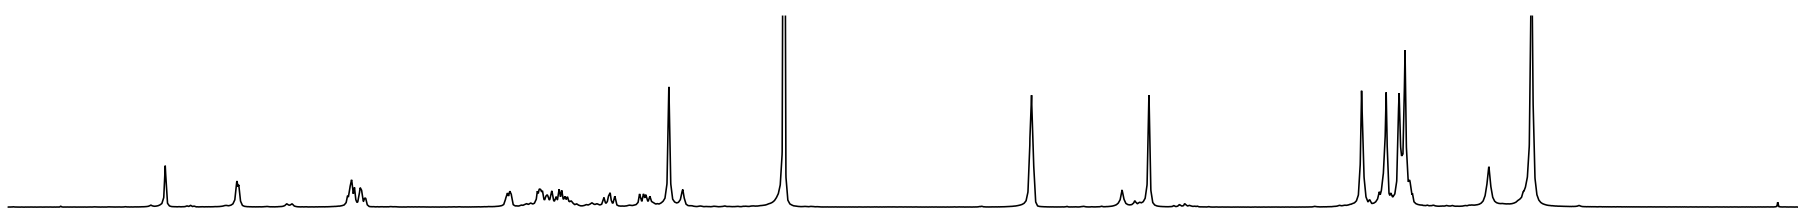

24 (<sup>1</sup>H - <sup>13</sup>C HSQC)

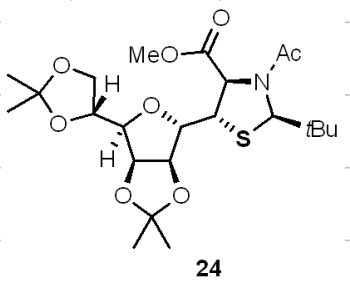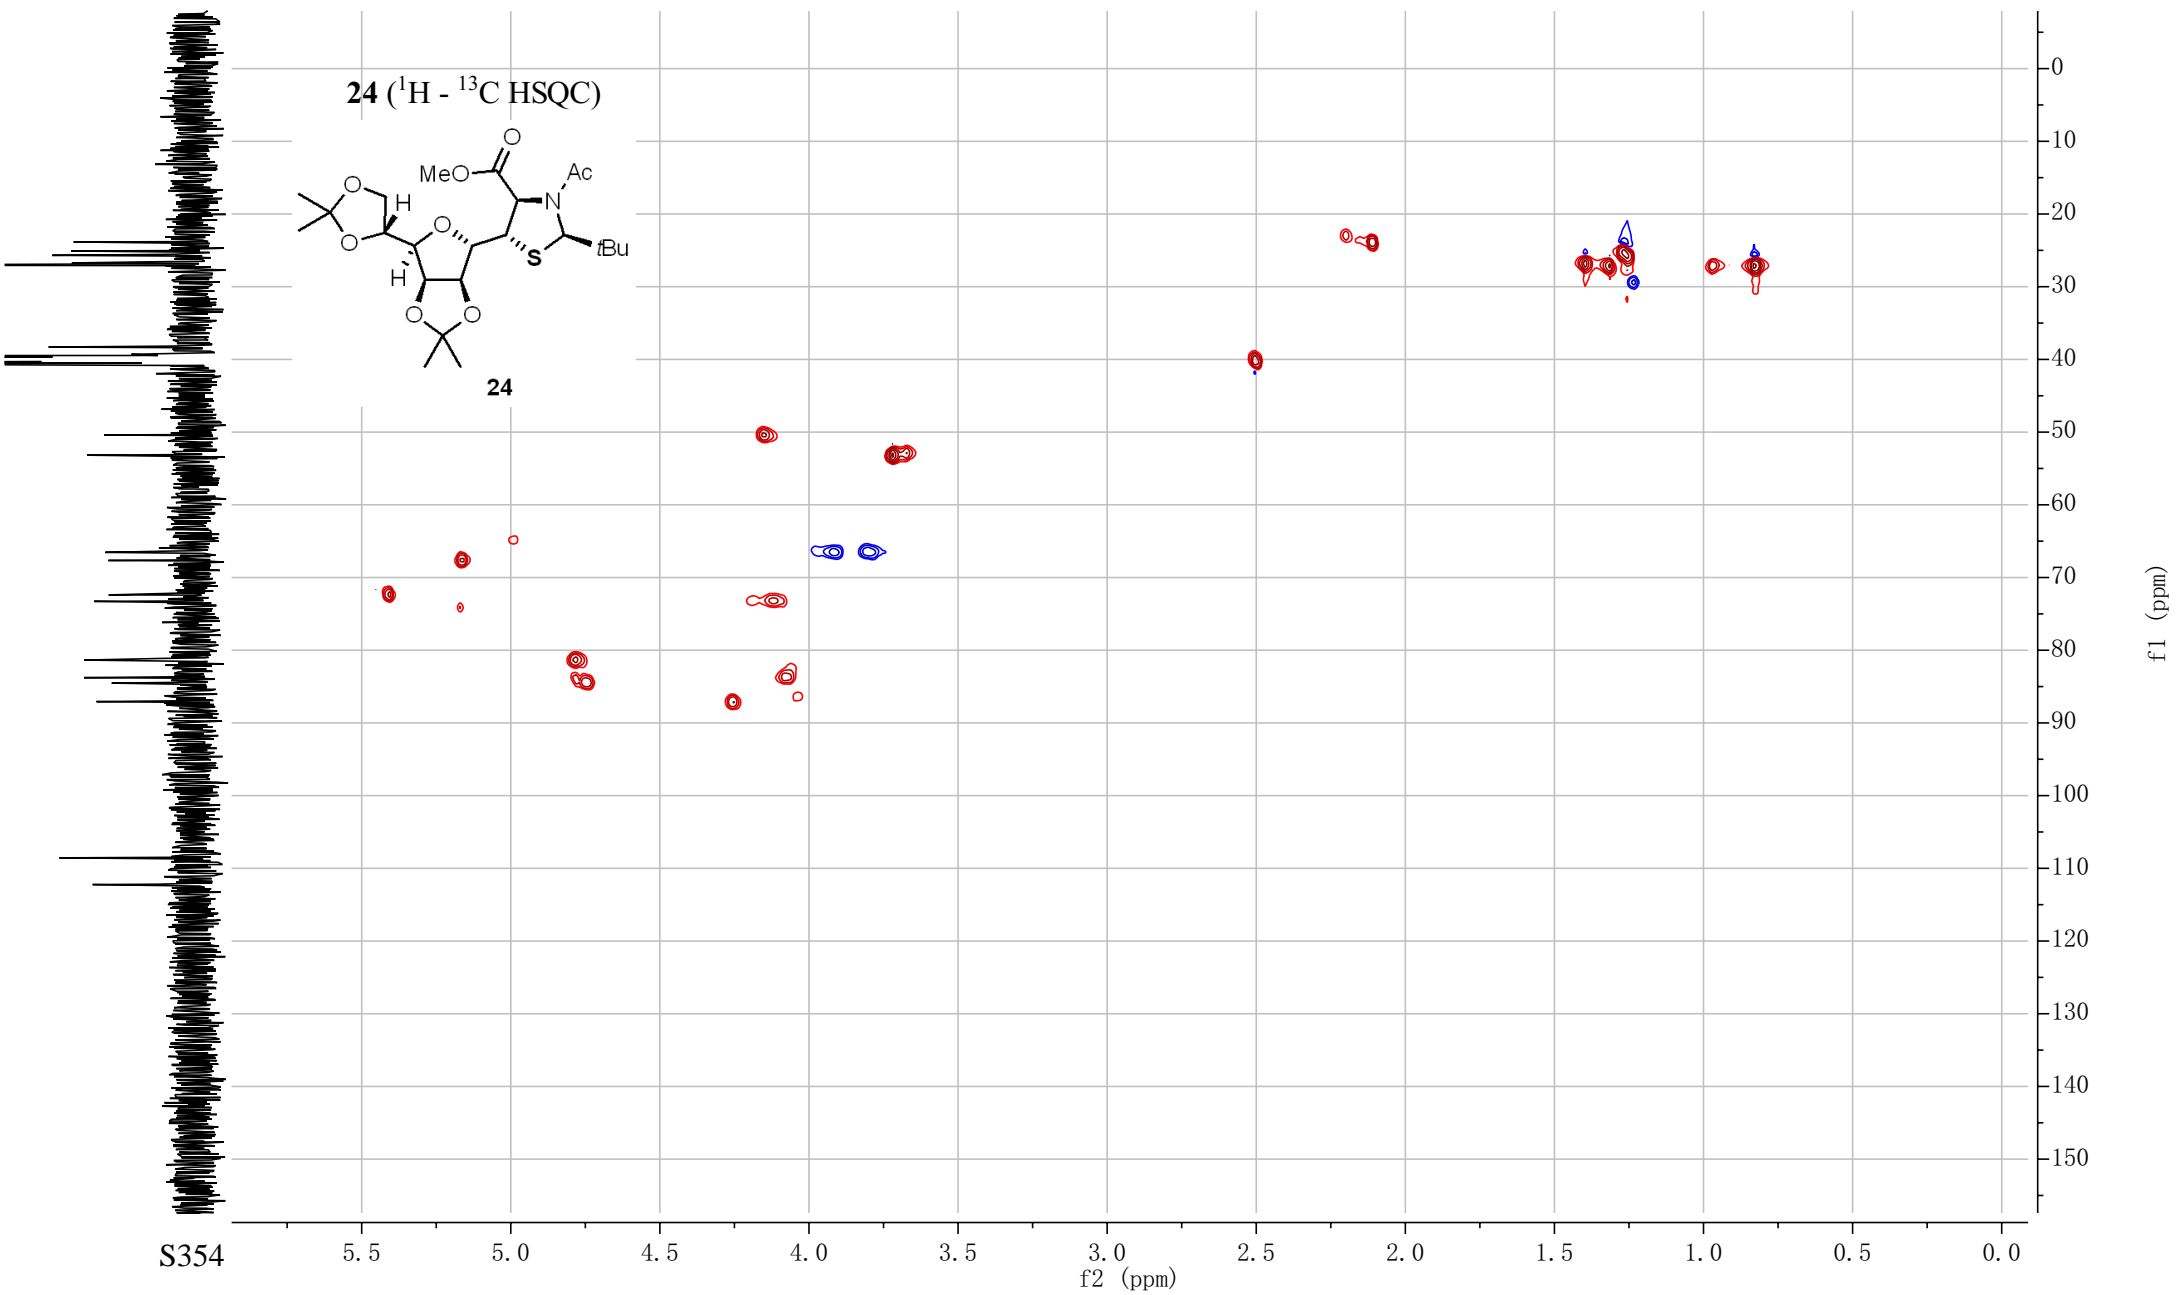

S354

f2 (ppm)

f1 (ppm)

5.09  
5.08  
4.82  
4.81  
4.81  
4.80  
4.76  
4.76  
4.75  
4.75  
4.22  
4.20  
4.19  
4.18  
4.17  
4.17  
4.16  
4.14  
4.13  
4.12  
4.12  
3.97  
3.96  
3.95  
3.94  
3.85  
3.84  
3.83  
3.82  
3.74  
2.52  
2.51  
2.51  
2.50  
2.50  
2.15  
1.43  
1.35  
1.30  
1.30  
1.28  
0.91  
0.91

24 (<sup>1</sup>H NMR, 500MHz, DMSO-d<sub>6</sub>, 85°C)

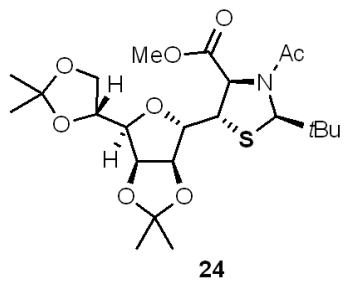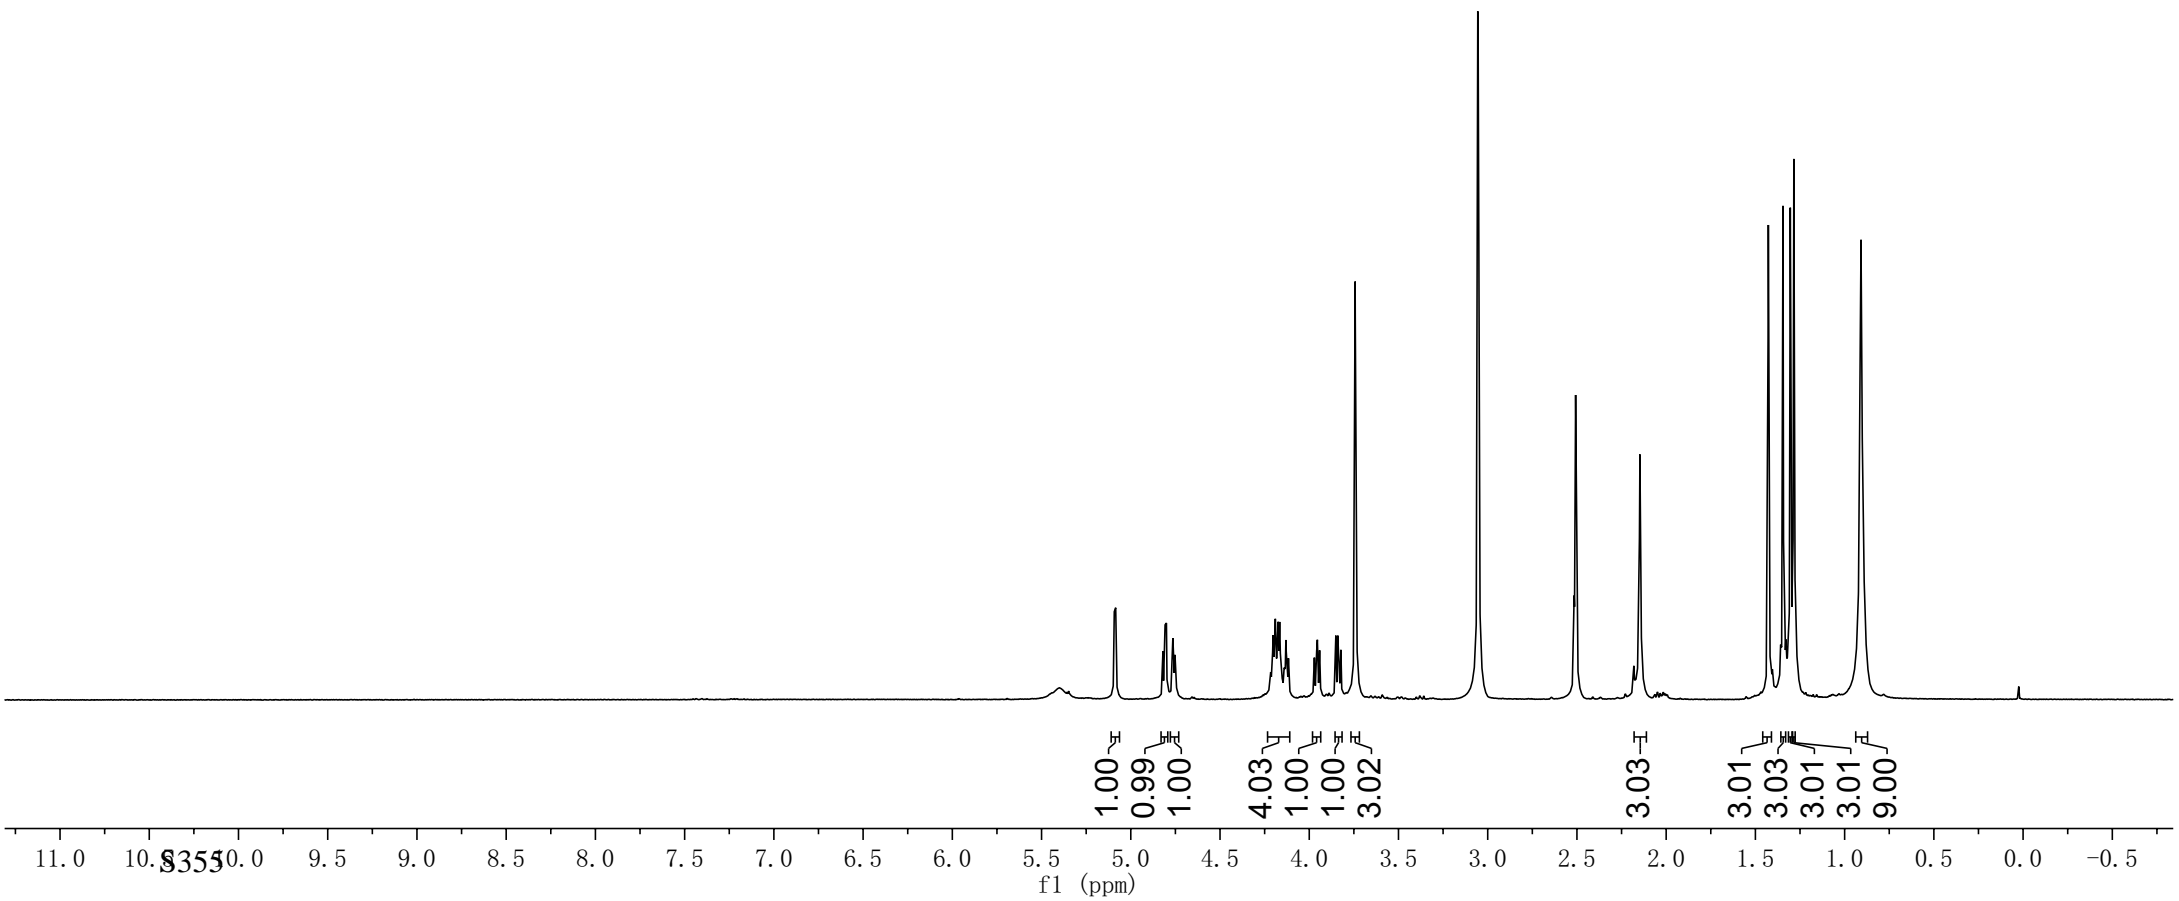

7.33  
7.32  
7.31  
7.30  
7.30  
7.29  
7.28  
7.28  
7.27  
7.26  
7.25  
7.24  
7.24  
7.23  
7.18  
7.18  
7.17  
7.16  
7.16  
6.14  
6.13  
5.06  
4.65  
4.62  
4.54  
4.53  
4.51  
4.50  
4.48  
4.47  
4.46  
4.45  
4.43  
4.37  
4.36  
4.22  
4.21  
4.20  
3.91  
3.90  
3.89  
3.88  
3.87  
3.77  
3.75  
3.74  
3.73  
3.72  
3.71  
3.70  
3.60  
3.59  
3.58  
3.57  
3.56  
2.19  
2.09  
2.09  
2.08

25 (<sup>1</sup>H NMR, 400MHz, CDCl<sub>3</sub>)

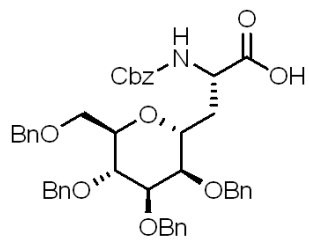

25

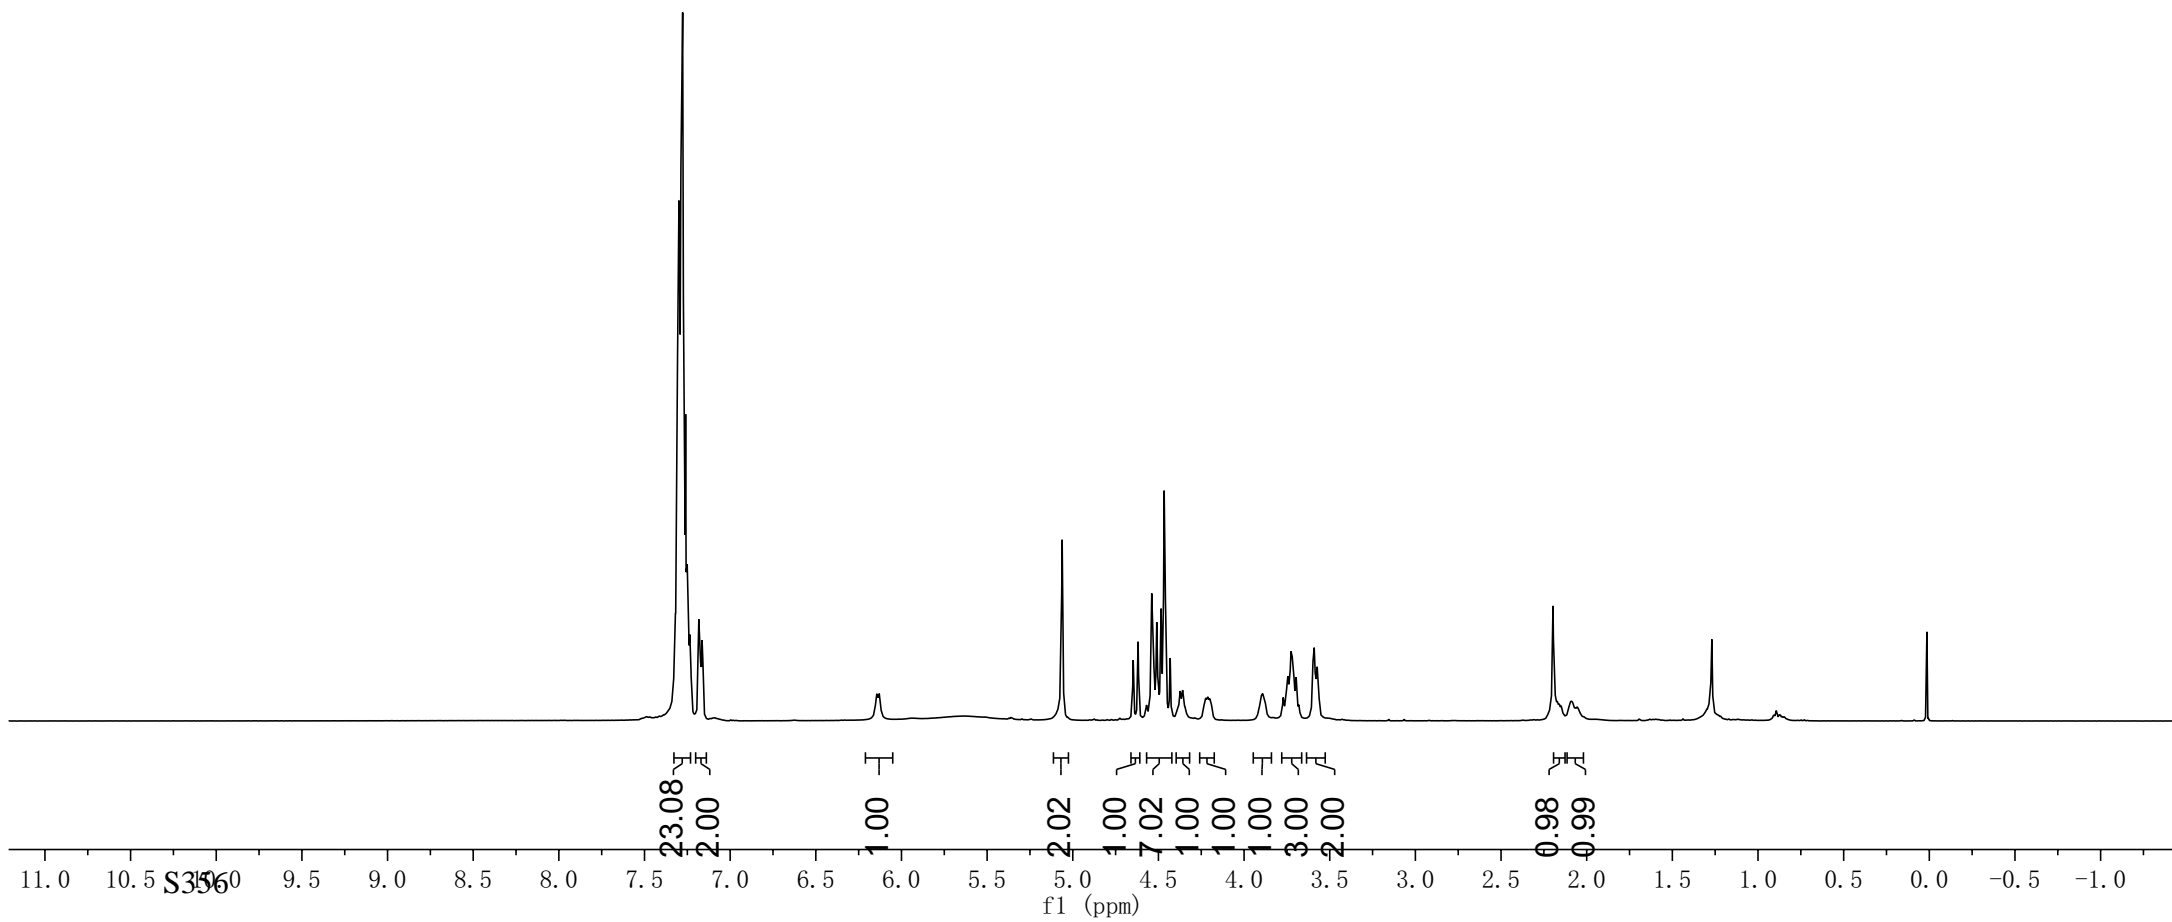

**25** ( $^{13}\text{C}$  NMR, 101MHz,  $\text{CDCl}_3$ )

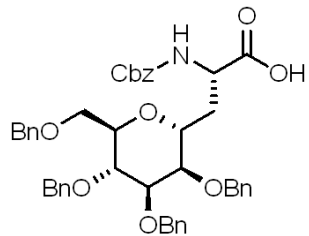

**25**

175.05  
156.27  
138.16  
138.10  
137.88  
136.53  
128.59  
128.52  
128.50  
128.15  
128.11  
128.06  
128.02  
127.98  
127.89  
127.87  
127.84  
77.48  
77.16  
76.84  
76.34  
74.87  
73.70  
73.29  
72.31  
71.86  
69.72  
68.85  
66.92  
52.29  
34.70

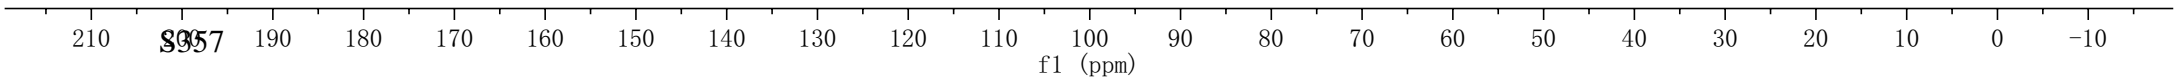



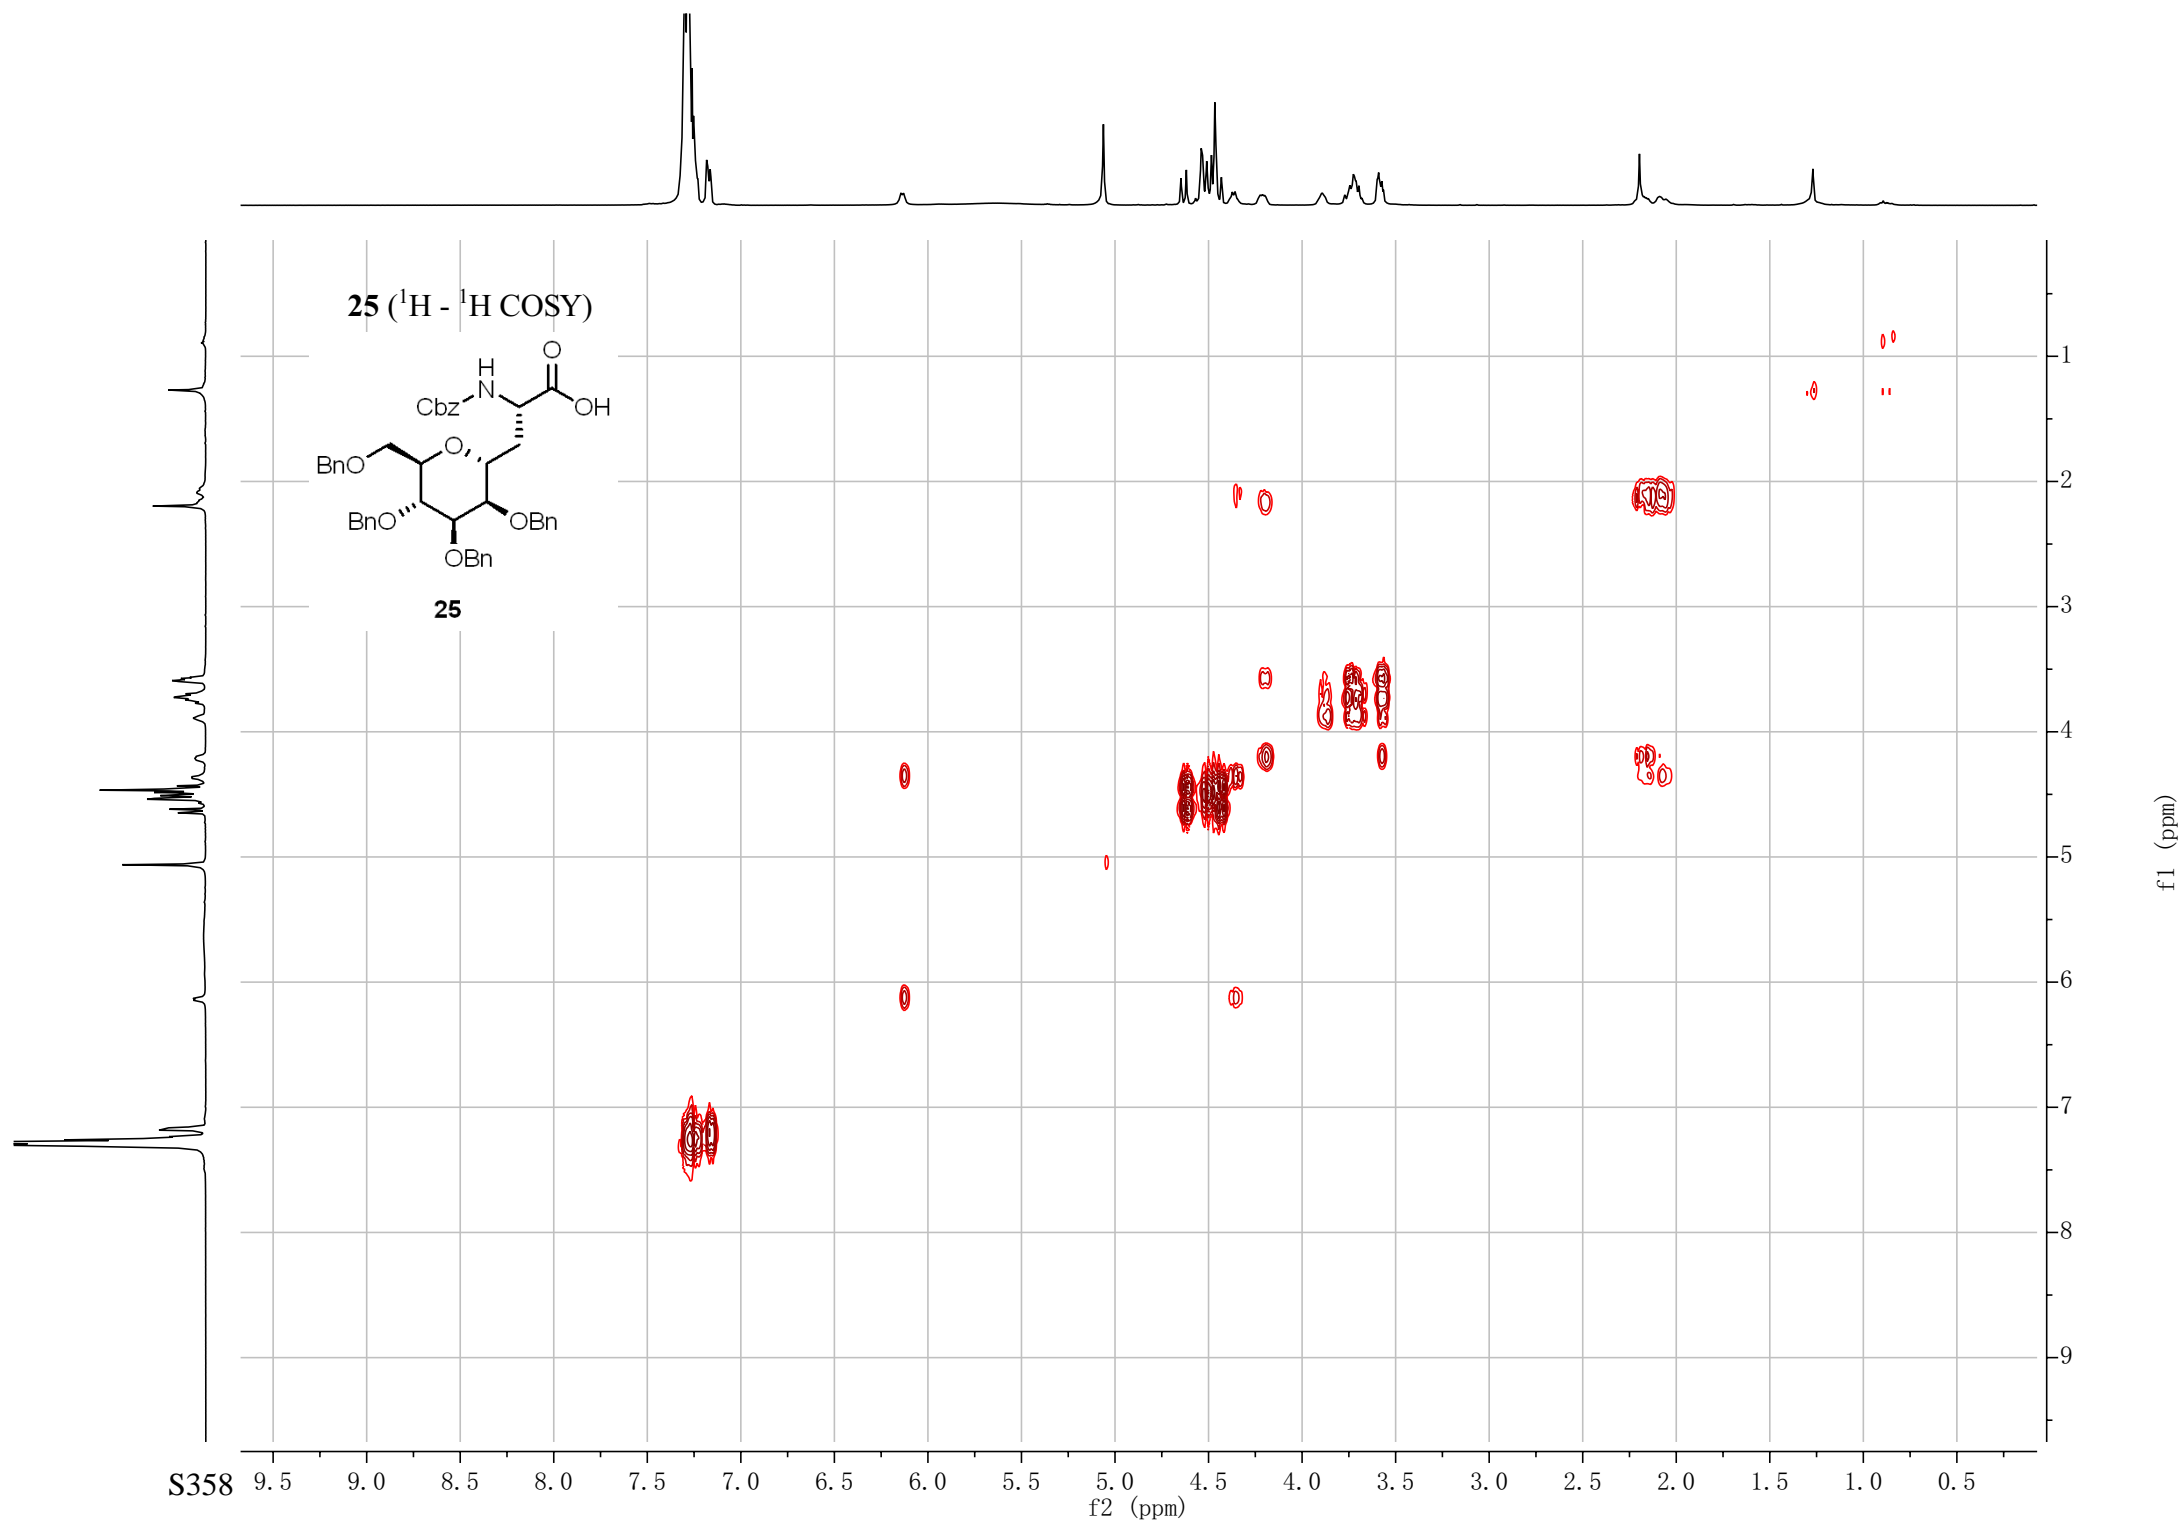

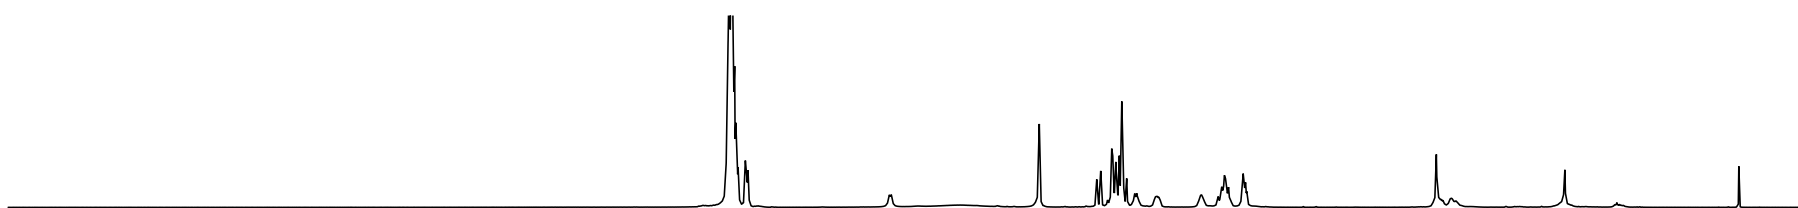

25 (<sup>1</sup>H - <sup>13</sup>C Coupled HSQC)

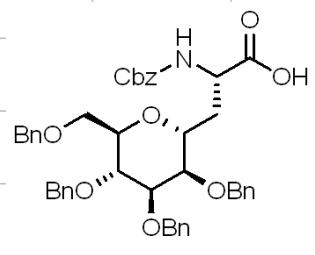

25

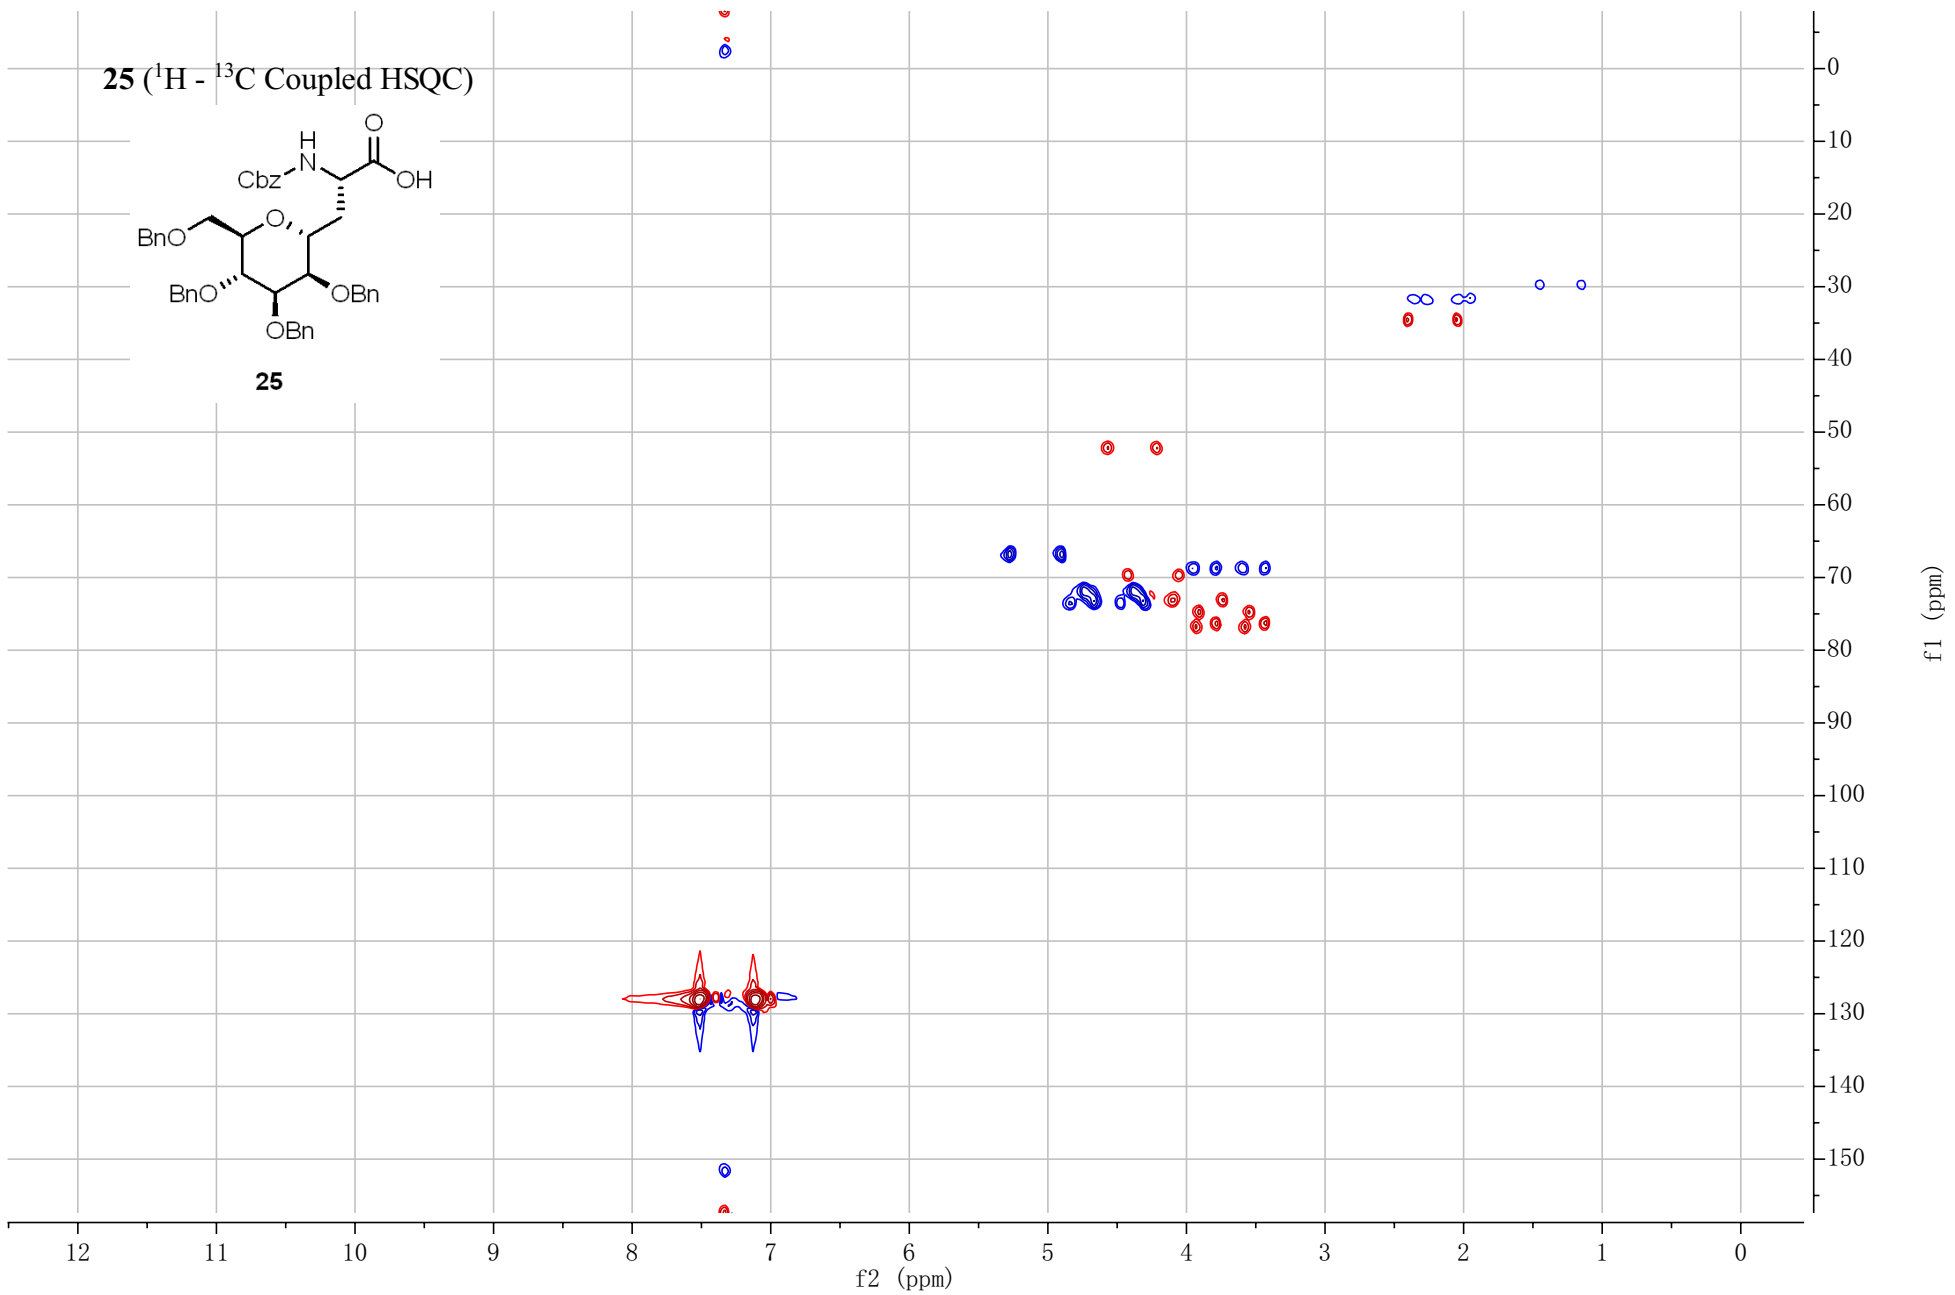

S359

f2 (ppm)

f1 (ppm)

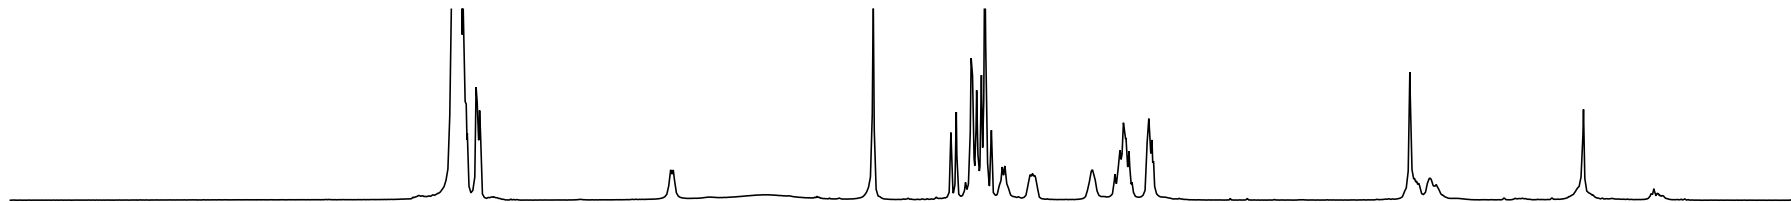

25 ( $^1\text{H} - ^{13}\text{C}$  HSQC)

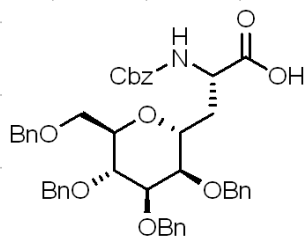

25

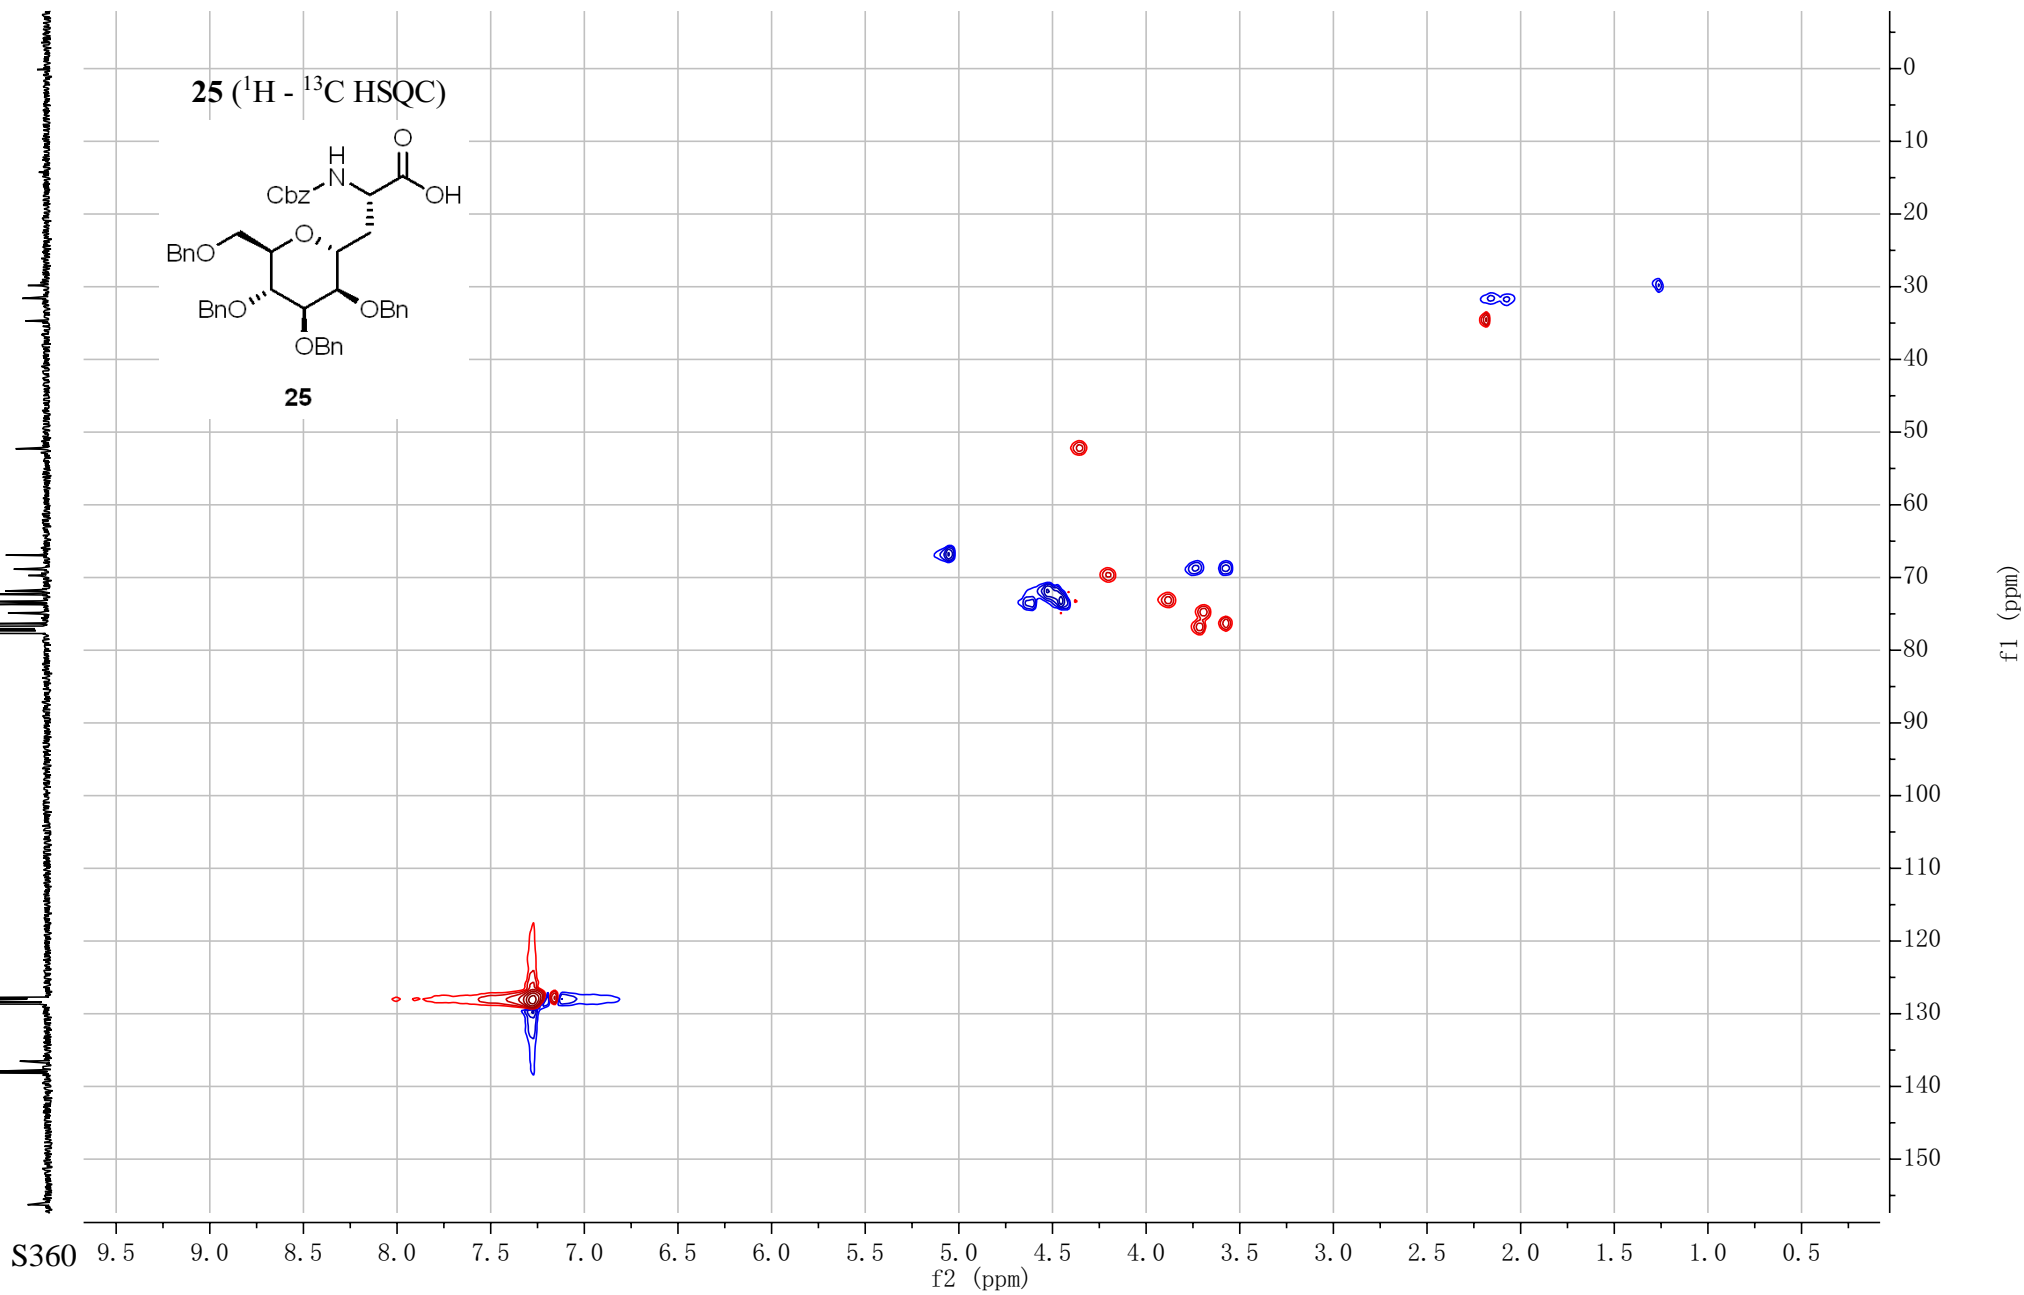

S360

f2 (ppm)

f1 (ppm)

7.35  
7.34  
7.34  
7.33  
7.33  
7.33  
7.32  
7.32  
7.31  
7.30  
7.30  
7.29  
7.29  
7.28  
7.28  
7.27  
7.27  
7.25  
7.25  
7.24  
7.22  
7.22  
7.21  
7.19  
7.18  
7.17  
7.12  
7.11  
5.04  
4.66  
4.63  
4.63  
4.62  
4.61  
4.57  
4.55  
4.52  
4.52  
4.51  
4.49  
4.49  
4.46  
4.43  
3.86  
3.85  
3.84  
3.83  
3.82  
3.71  
3.69  
3.62  
3.62  
3.58  
3.57  
1.95  
1.95  
1.94  
1.93  
1.93

**26** (<sup>1</sup>H NMR, 400MHz, CD<sub>3</sub>CN)

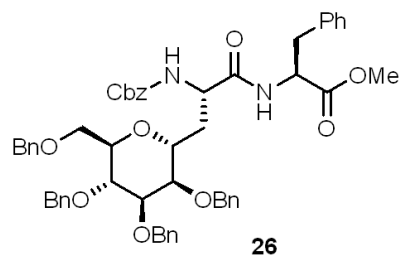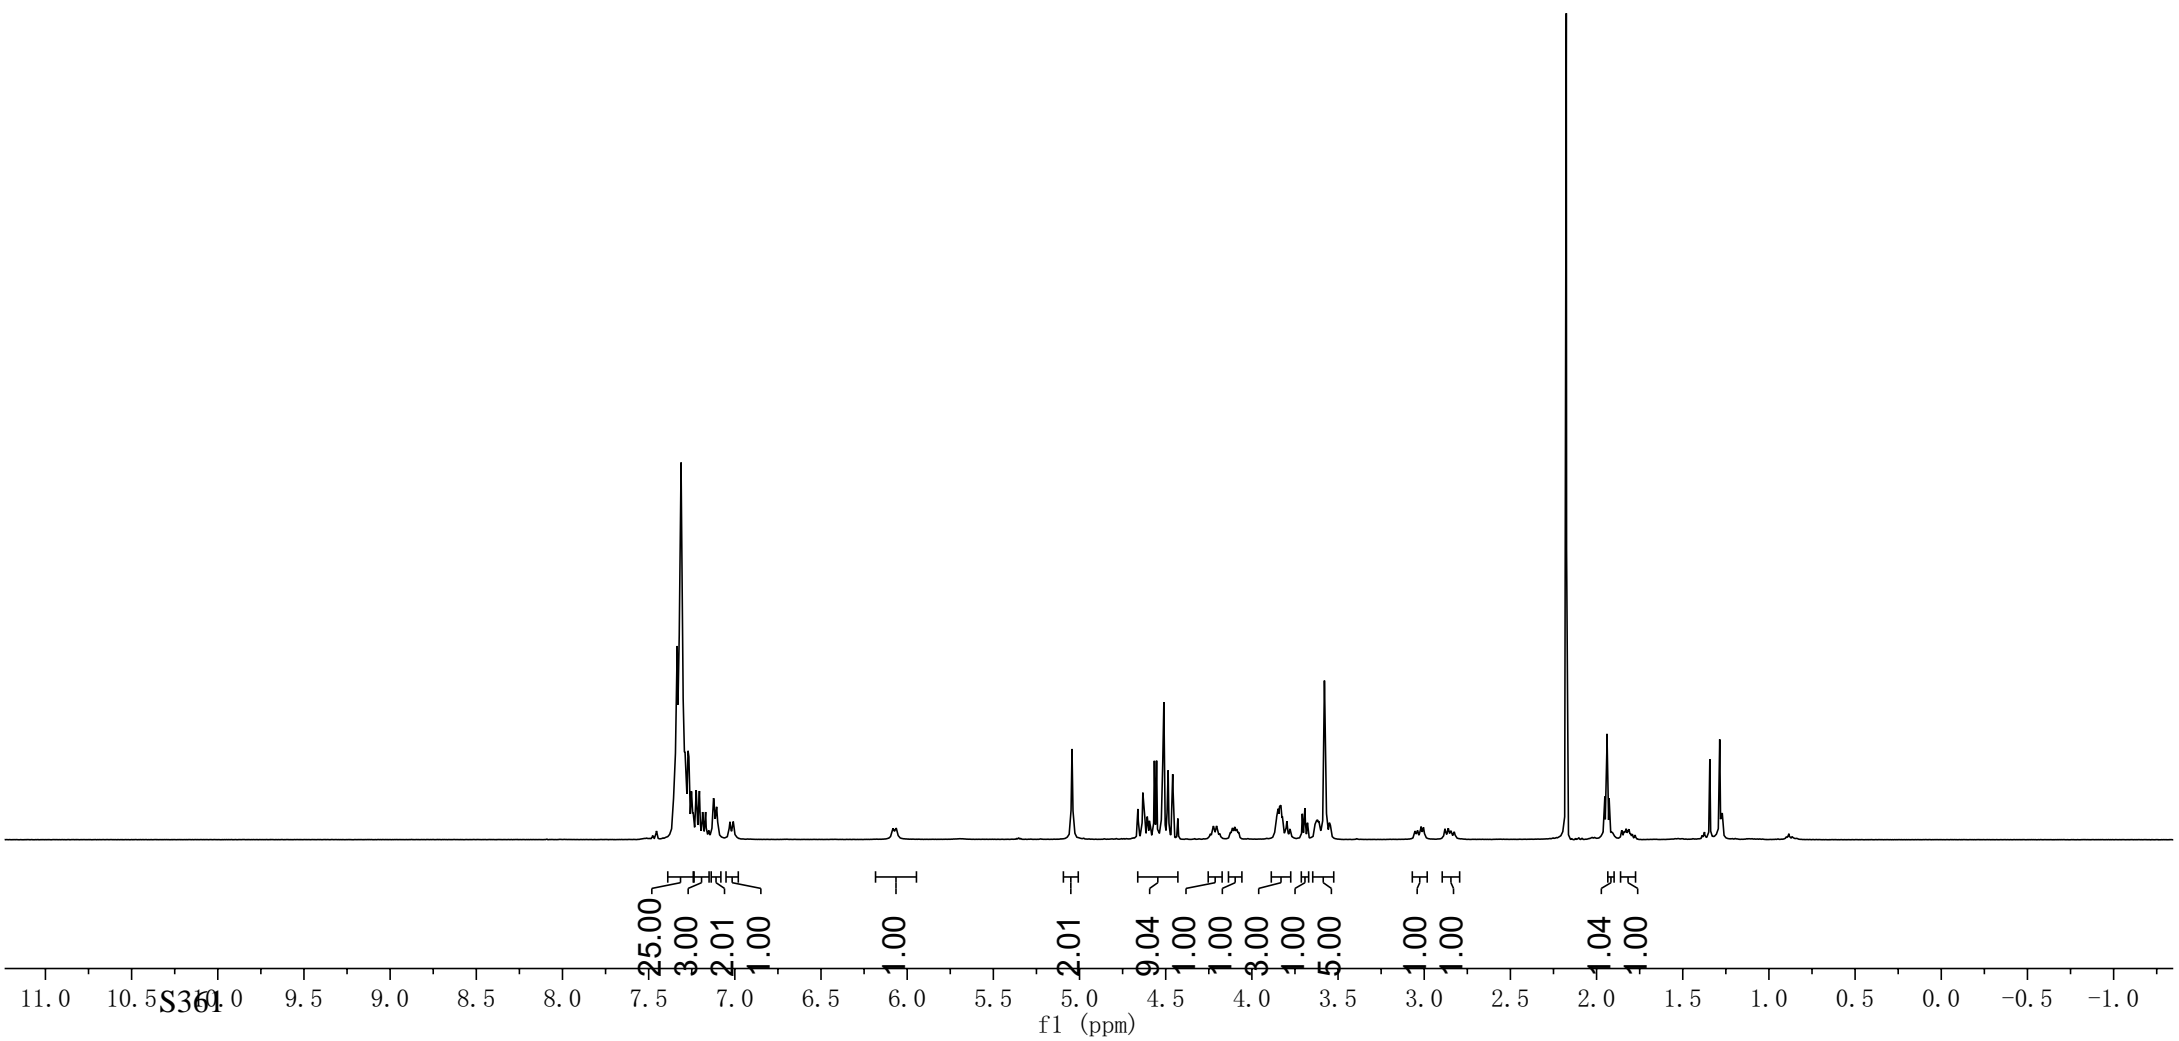

26 (<sup>13</sup>C NMR, 101MHz, CD<sub>3</sub>CN)

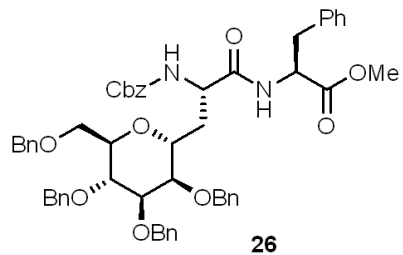

172.55  
172.05  
156.79  
139.56  
139.52  
139.44  
138.00  
137.68  
130.17  
129.39  
129.30  
129.27  
129.25  
129.23  
128.92  
128.84  
128.82  
128.80  
128.75  
128.71  
128.51  
128.45  
127.68  
118.26  
77.17  
75.61  
74.10  
73.96  
73.32  
72.71  
72.06  
70.07  
69.24  
67.12  
54.47  
53.47  
52.68  
37.97  
31.51  
1.88  
1.67  
1.46  
1.26  
1.05  
0.84  
0.64

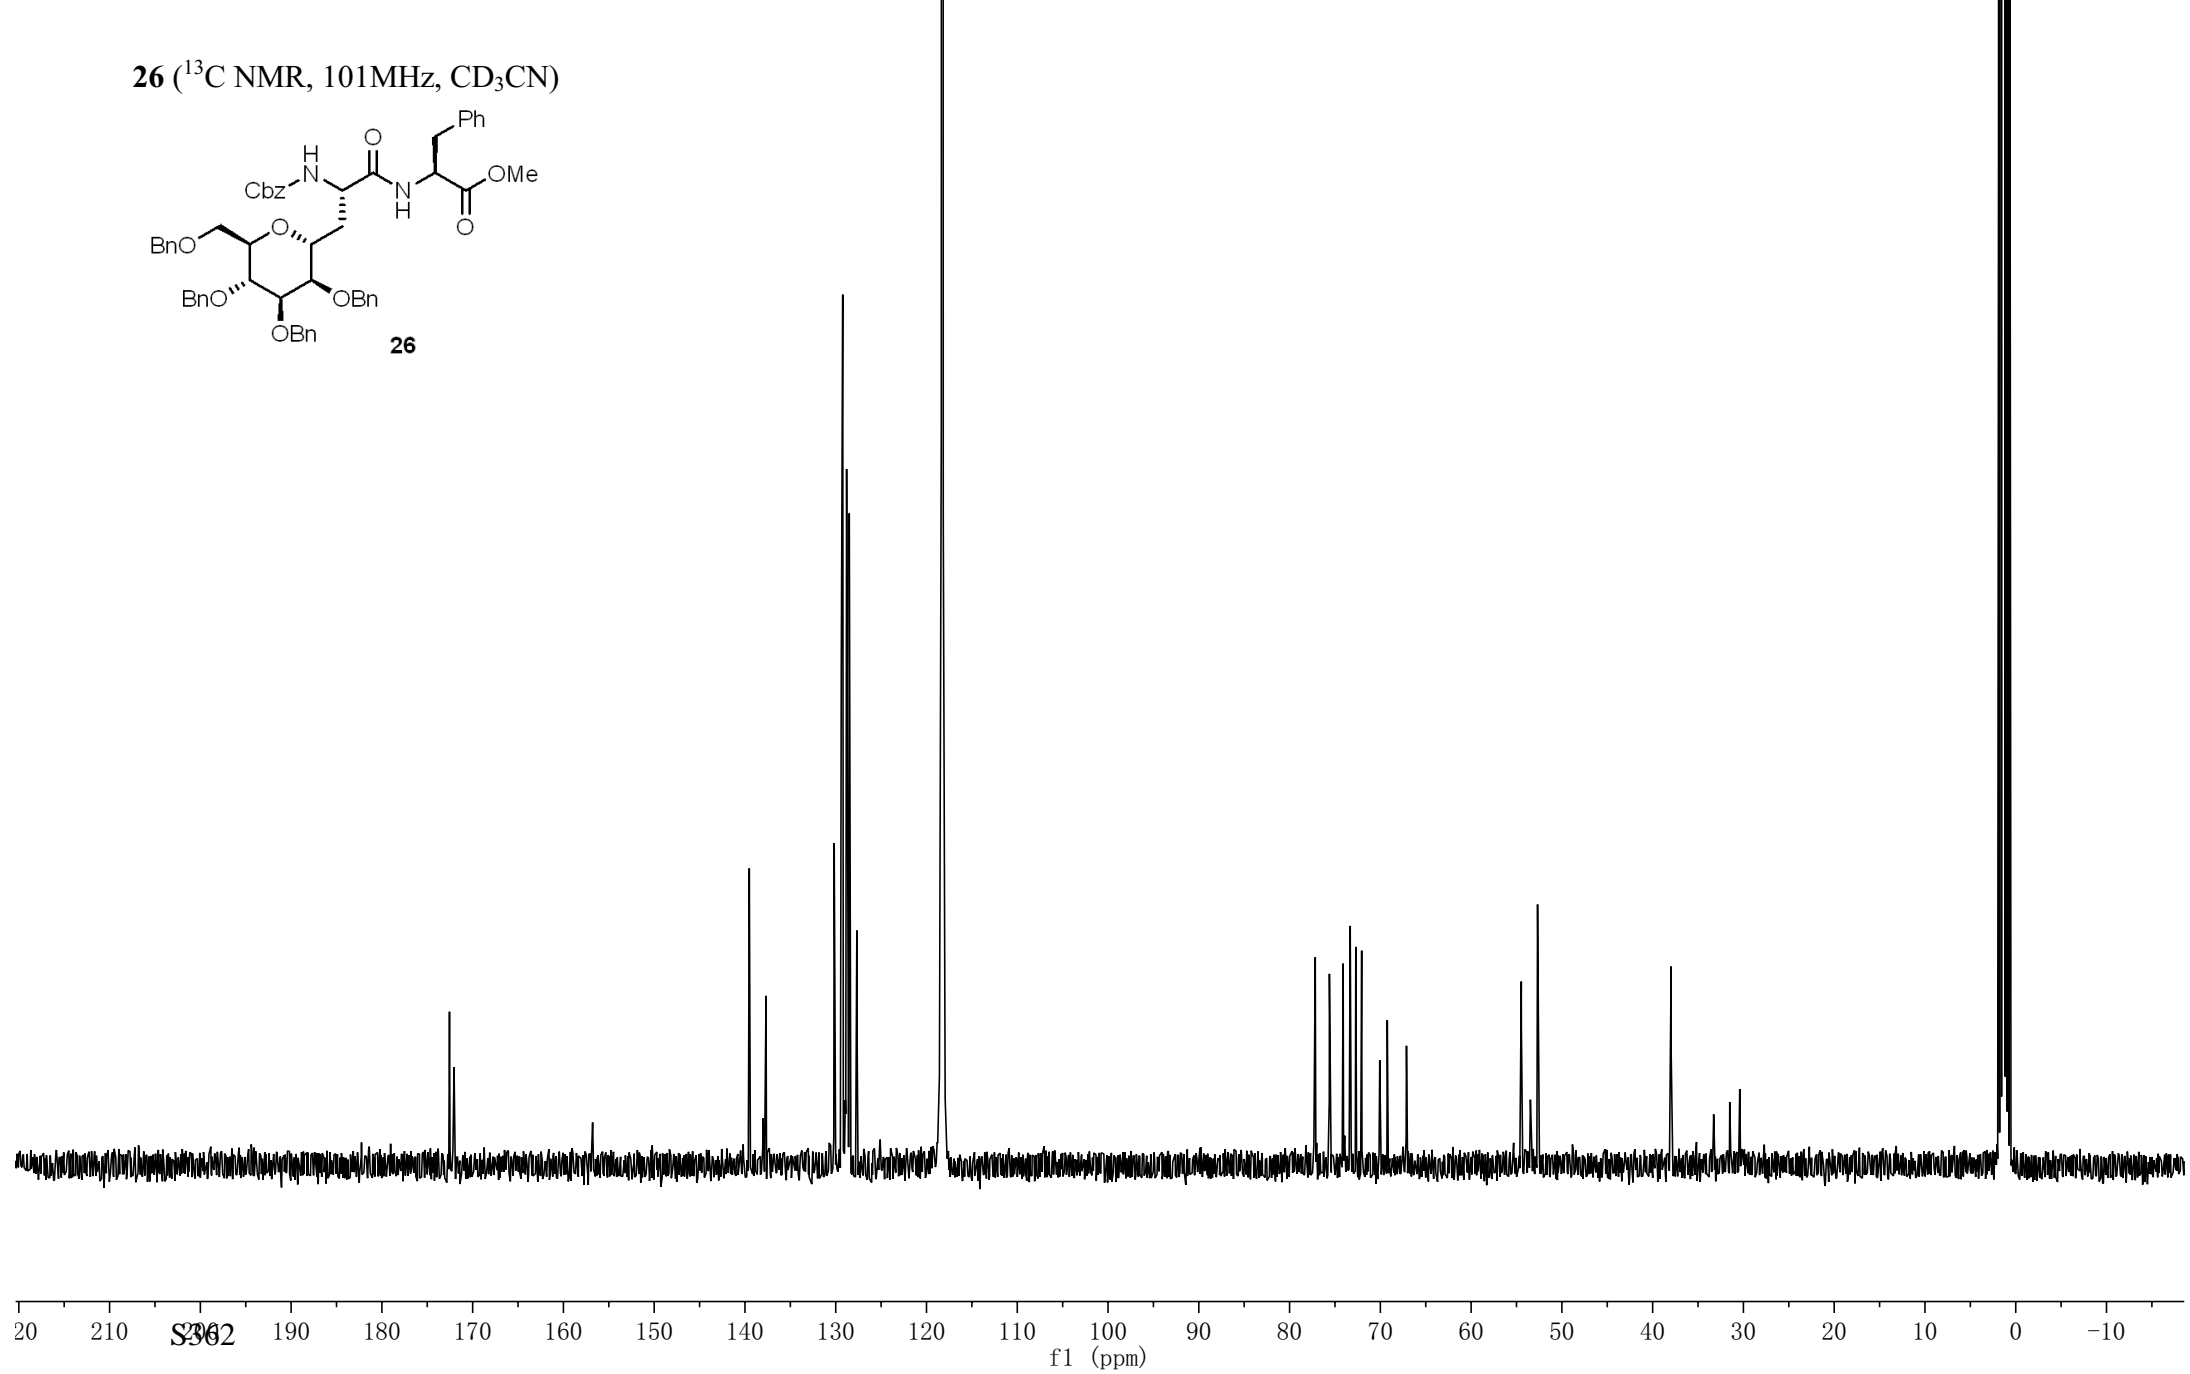

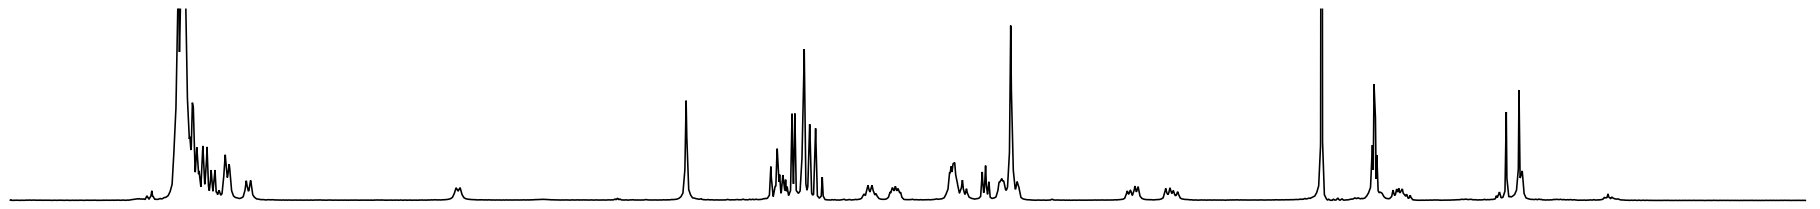

**26** ( $^1\text{H} - ^1\text{H}$  COSY)

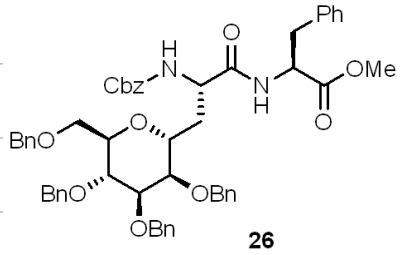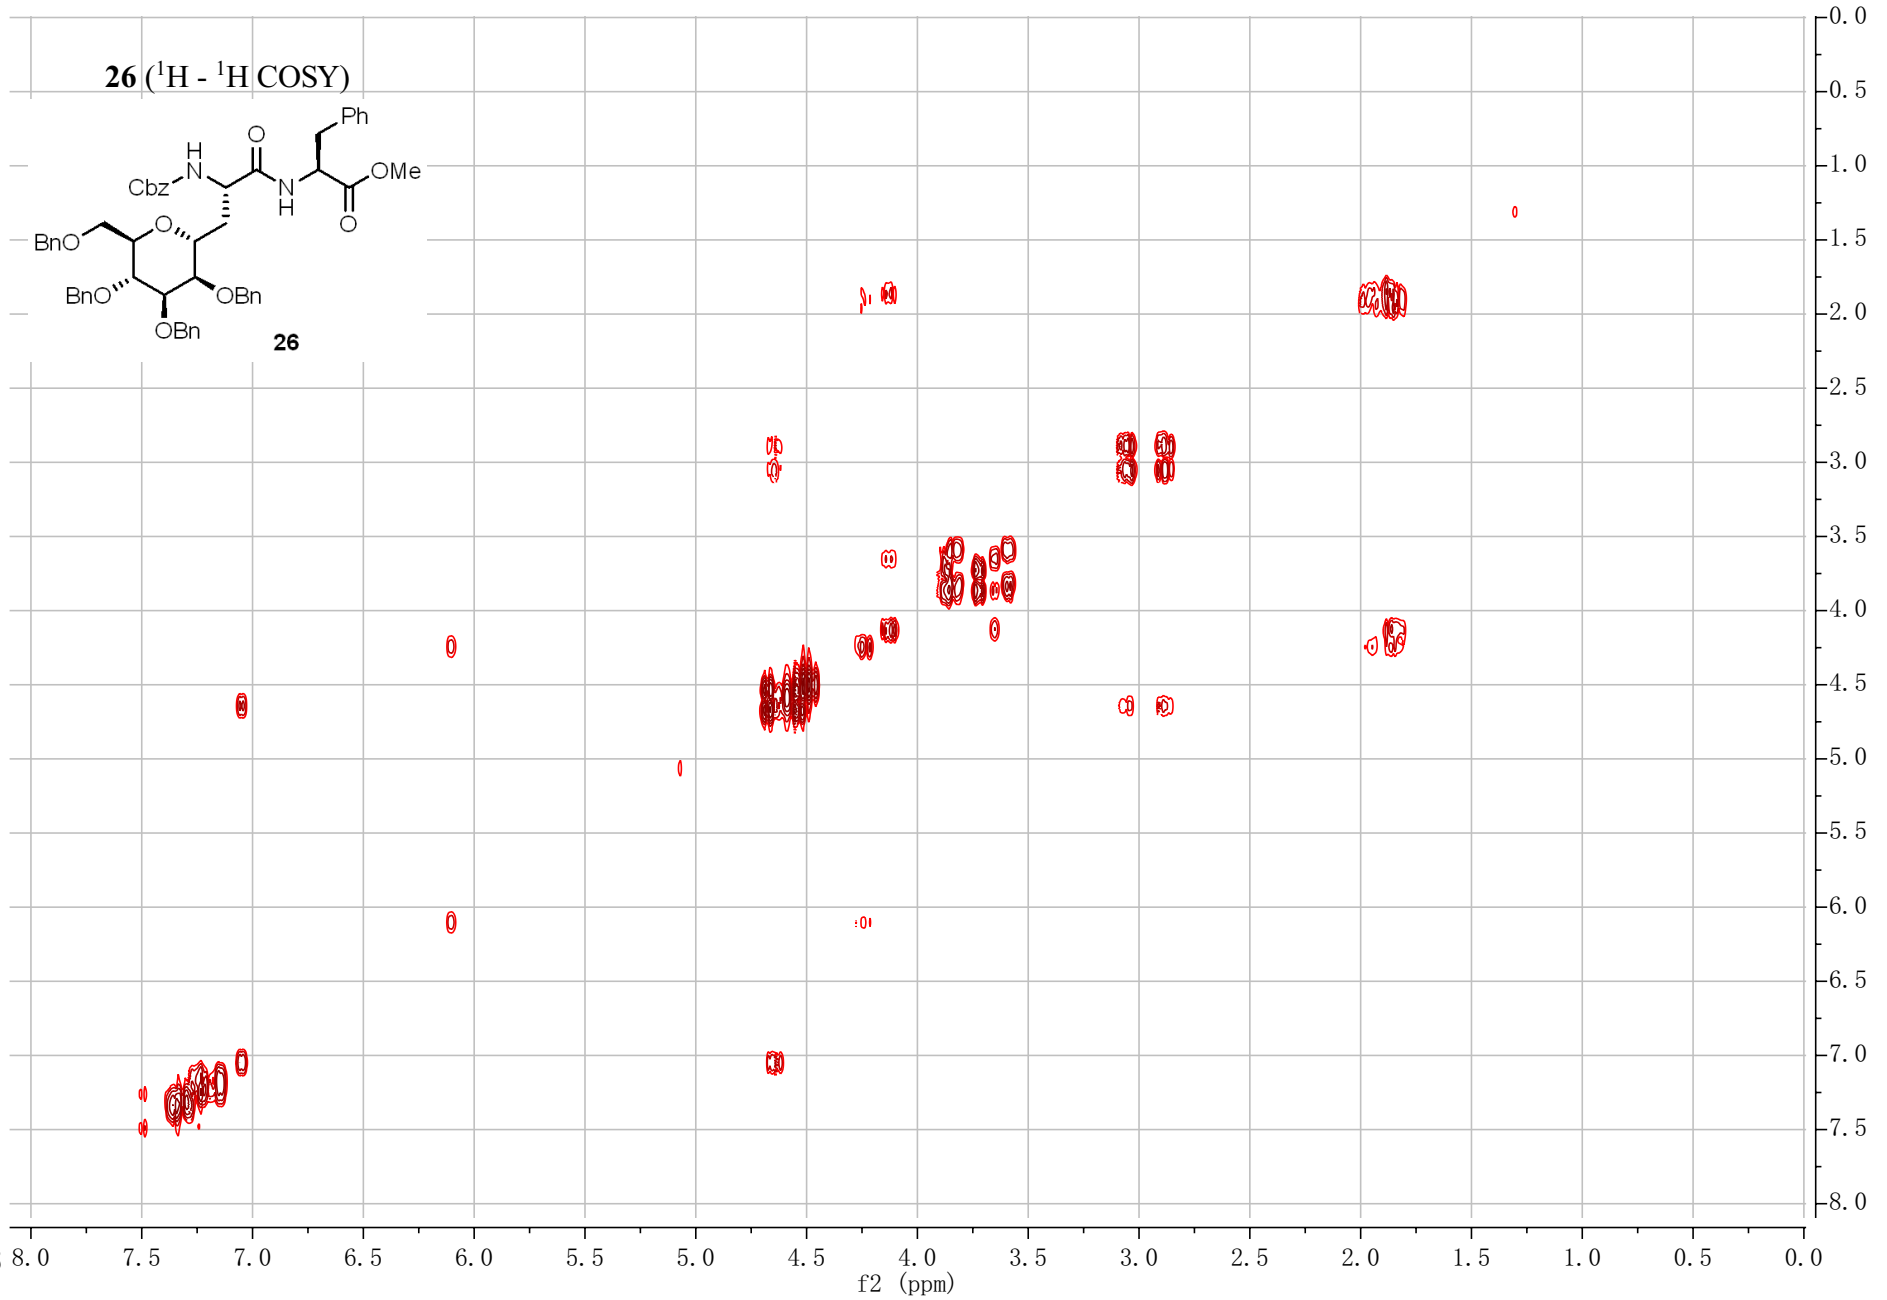

S363

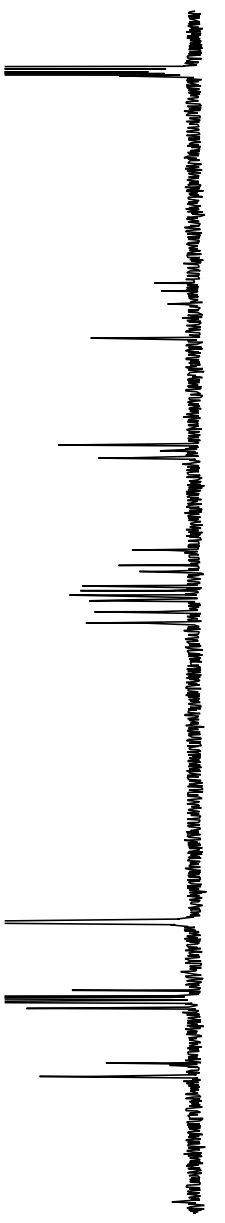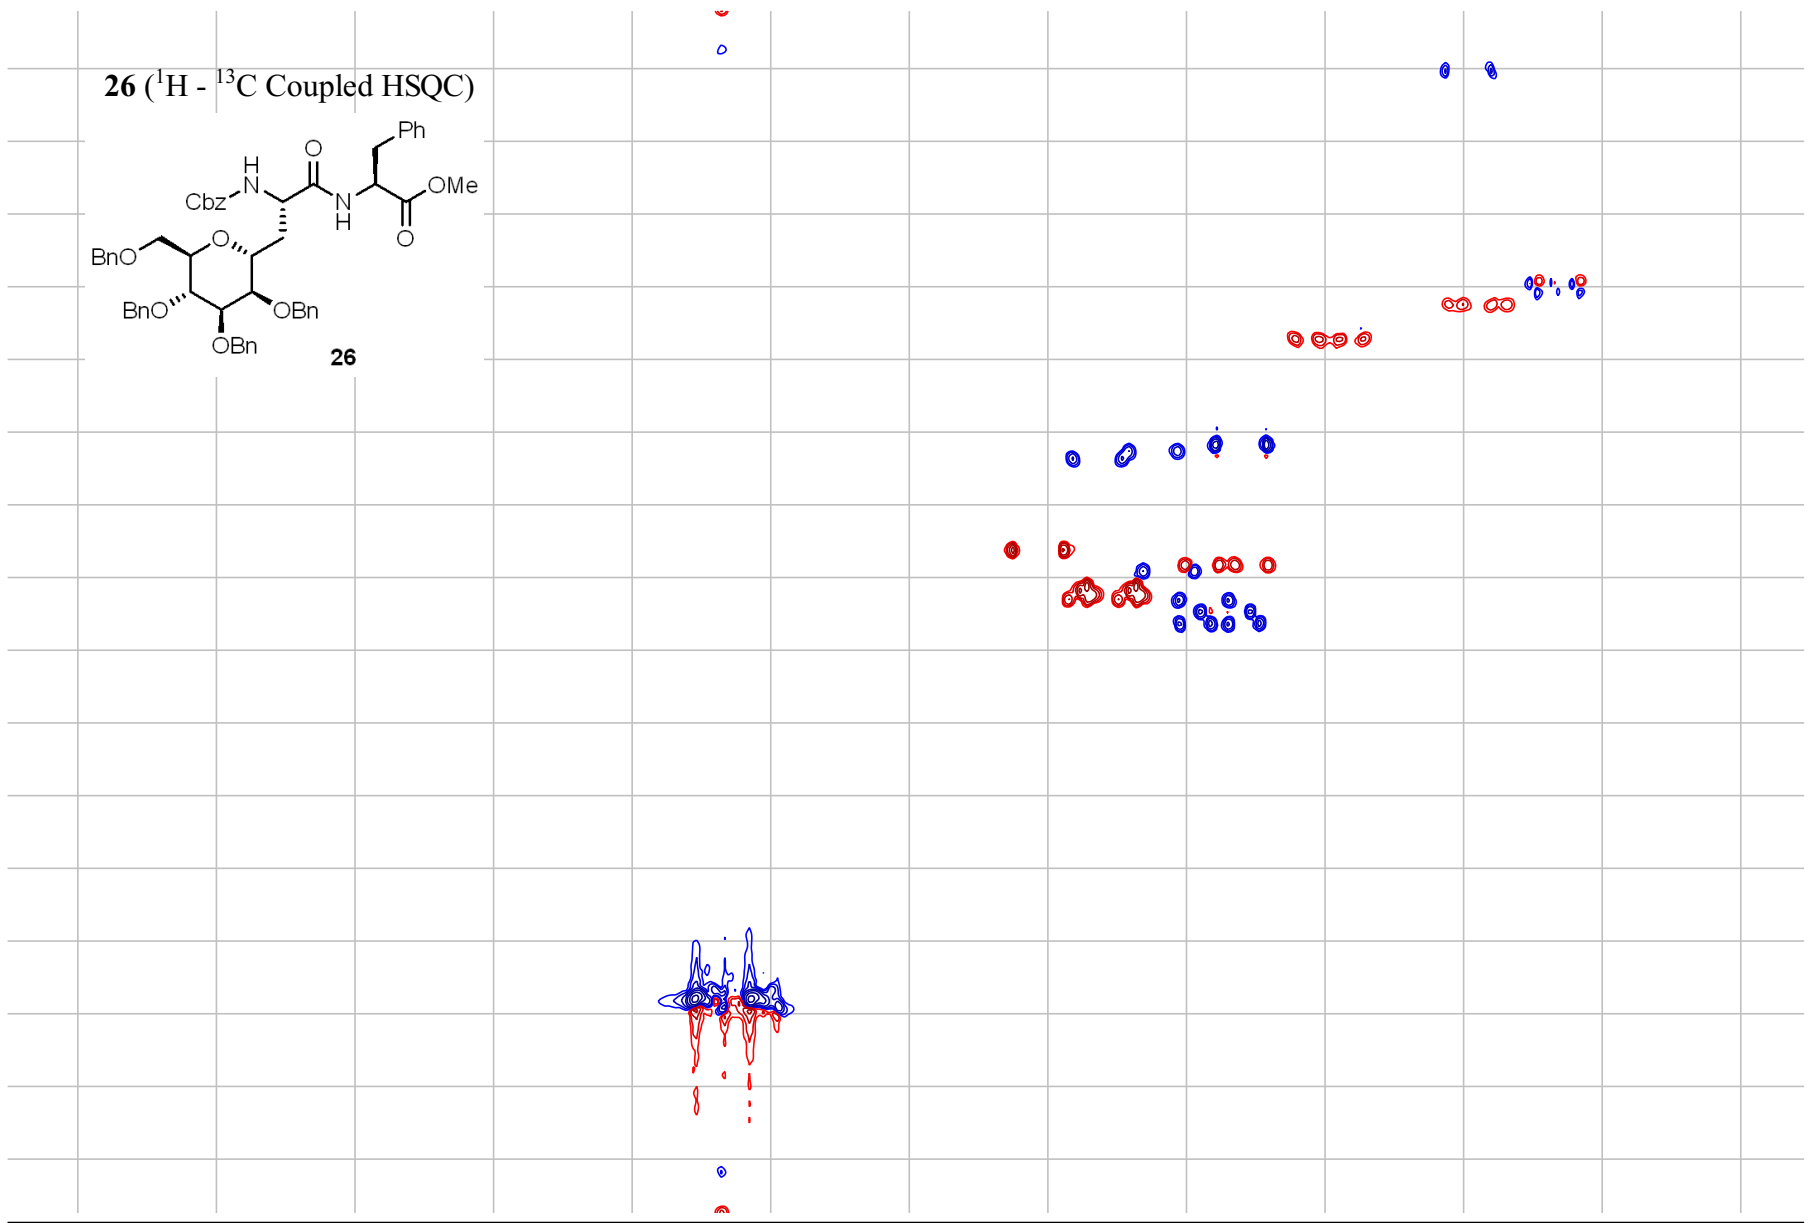

26 (<sup>1</sup>H - <sup>13</sup>C Coupled HSQC)

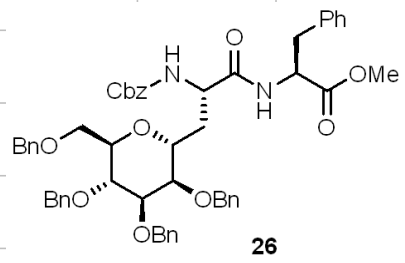

26

S364

f2 (ppm)

f1 (ppm)

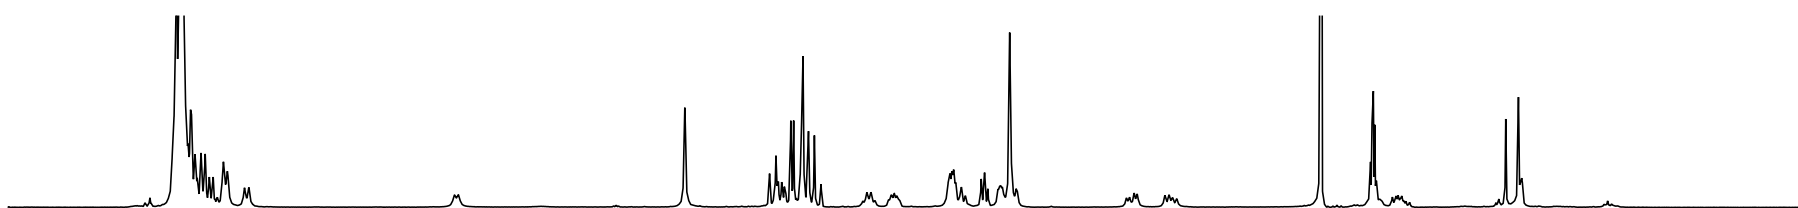

26 (<sup>1</sup>H - <sup>13</sup>C HSQC)

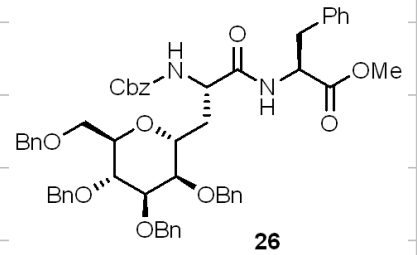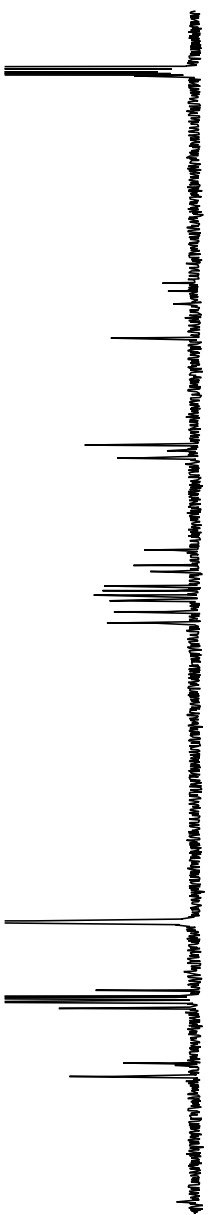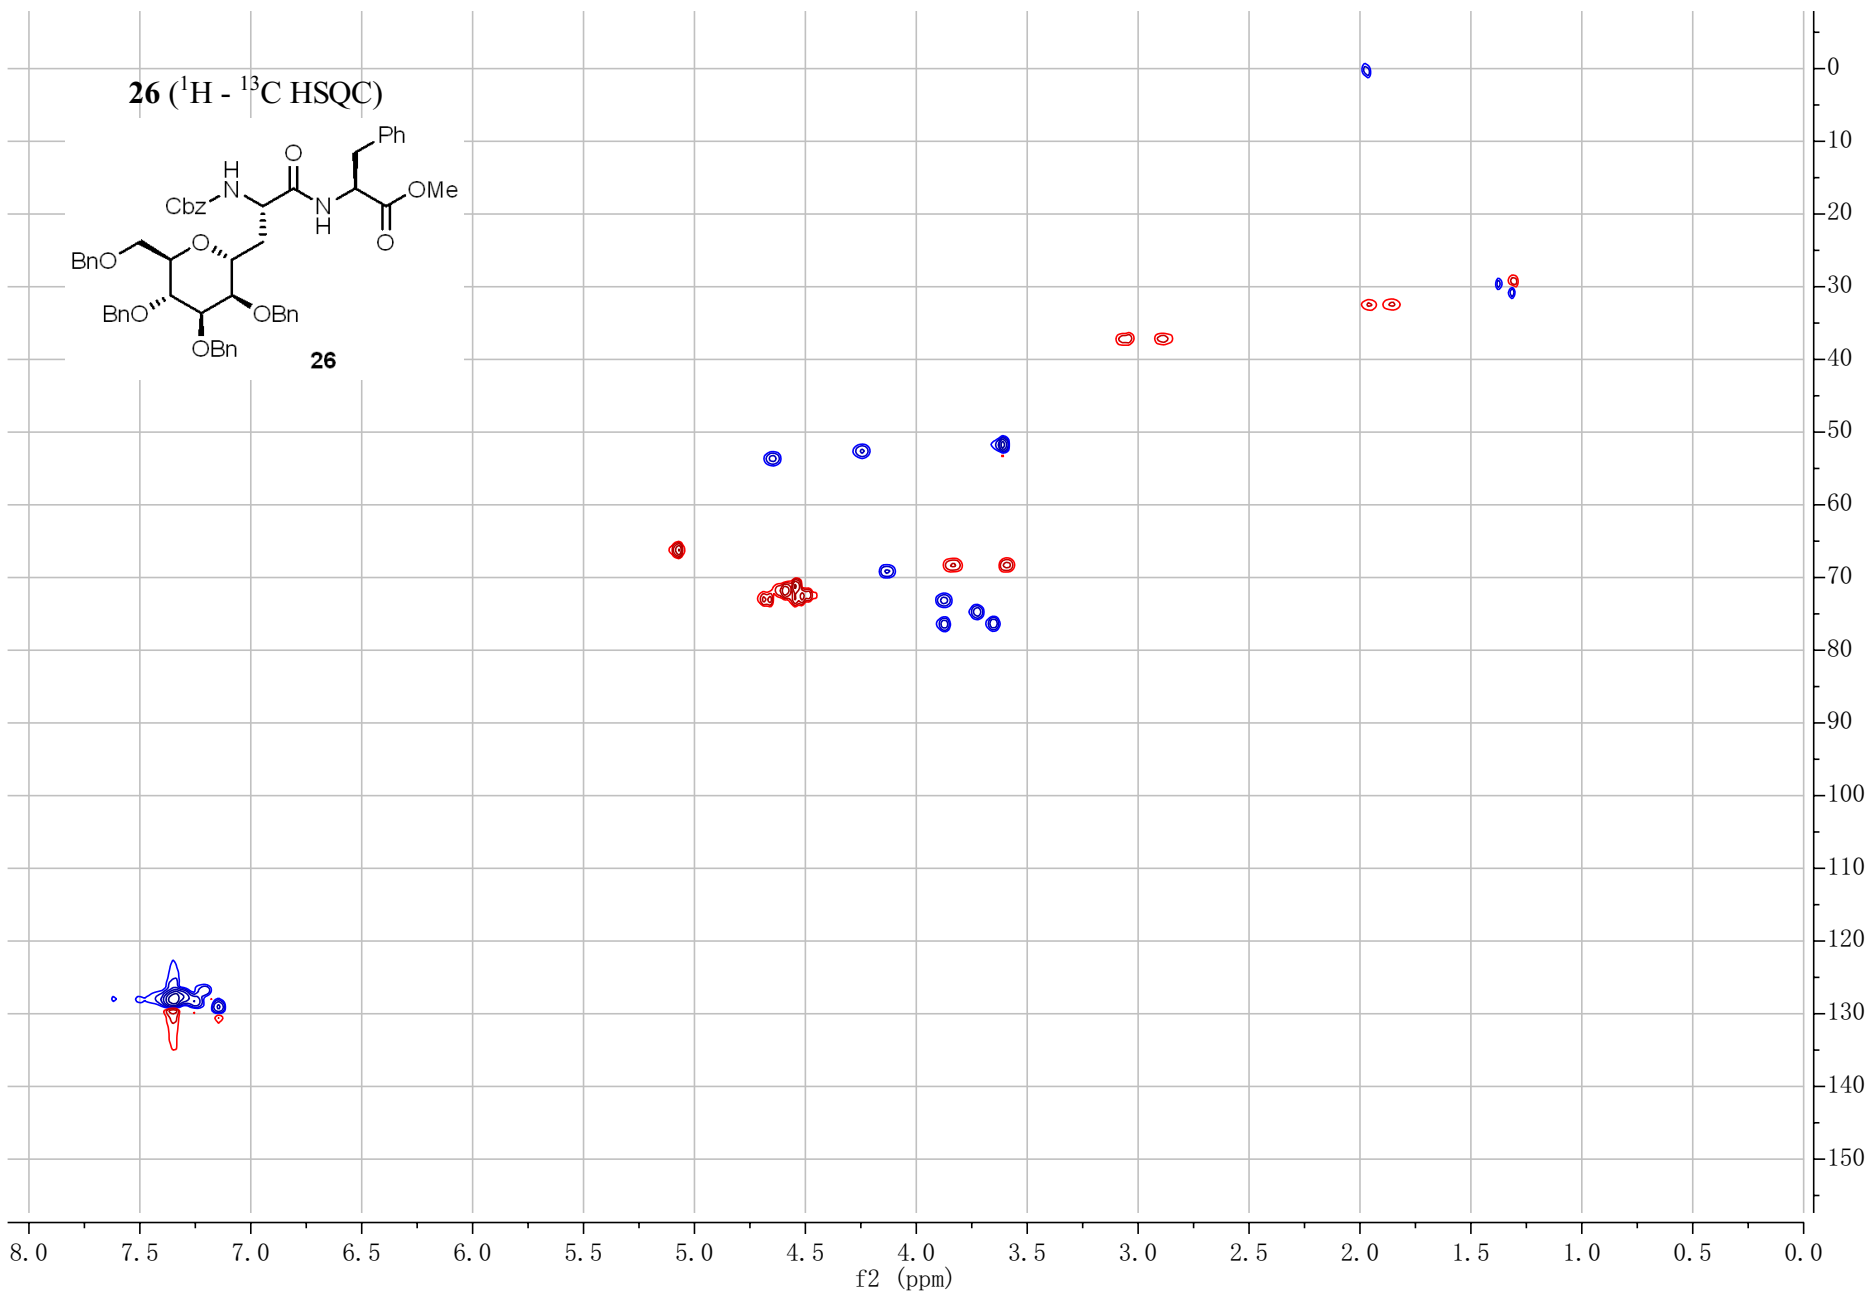

S365

f2 (ppm)

f1 (ppm)



7.39  
7.38  
7.38  
7.37  
7.37  
7.36  
7.35  
7.35  
7.34  
7.33  
5.57  
5.54  
5.24  
5.21  
5.21  
5.18  
5.16  
5.16  
5.12  
4.78  
4.77  
4.77  
4.76  
4.57  
4.56  
4.55  
4.54  
4.43  
4.42  
4.41  
4.40  
4.40  
4.39  
4.38  
4.12  
4.10  
4.09  
4.07  
4.05  
4.04  
4.03  
3.84  
3.83  
3.82  
3.81  
2.02  
1.99  
1.98  
1.96  
1.93  
1.91  
1.90  
1.50  
1.43  
1.38  
1.33  
0.94  
0.06

**d-19a** (<sup>1</sup>H NMR, 400MHz, CDCl<sub>3</sub>)

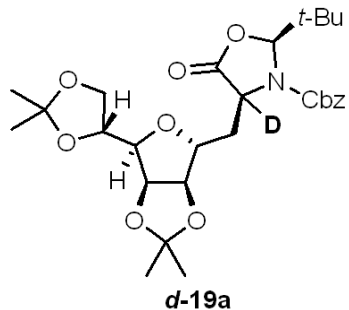

11.0  
10.0  
9.0  
8.0  
7.0  
6.0  
5.0  
4.0  
3.0  
2.0  
1.0  
0.0  
-1.0

f1 (ppm)

5.14  
1.00  
2.03  
0.99  
1.82  
1.05  
2.11  
0.89  
1.88  
3.21  
3.13  
3.19  
3.00  
9.37

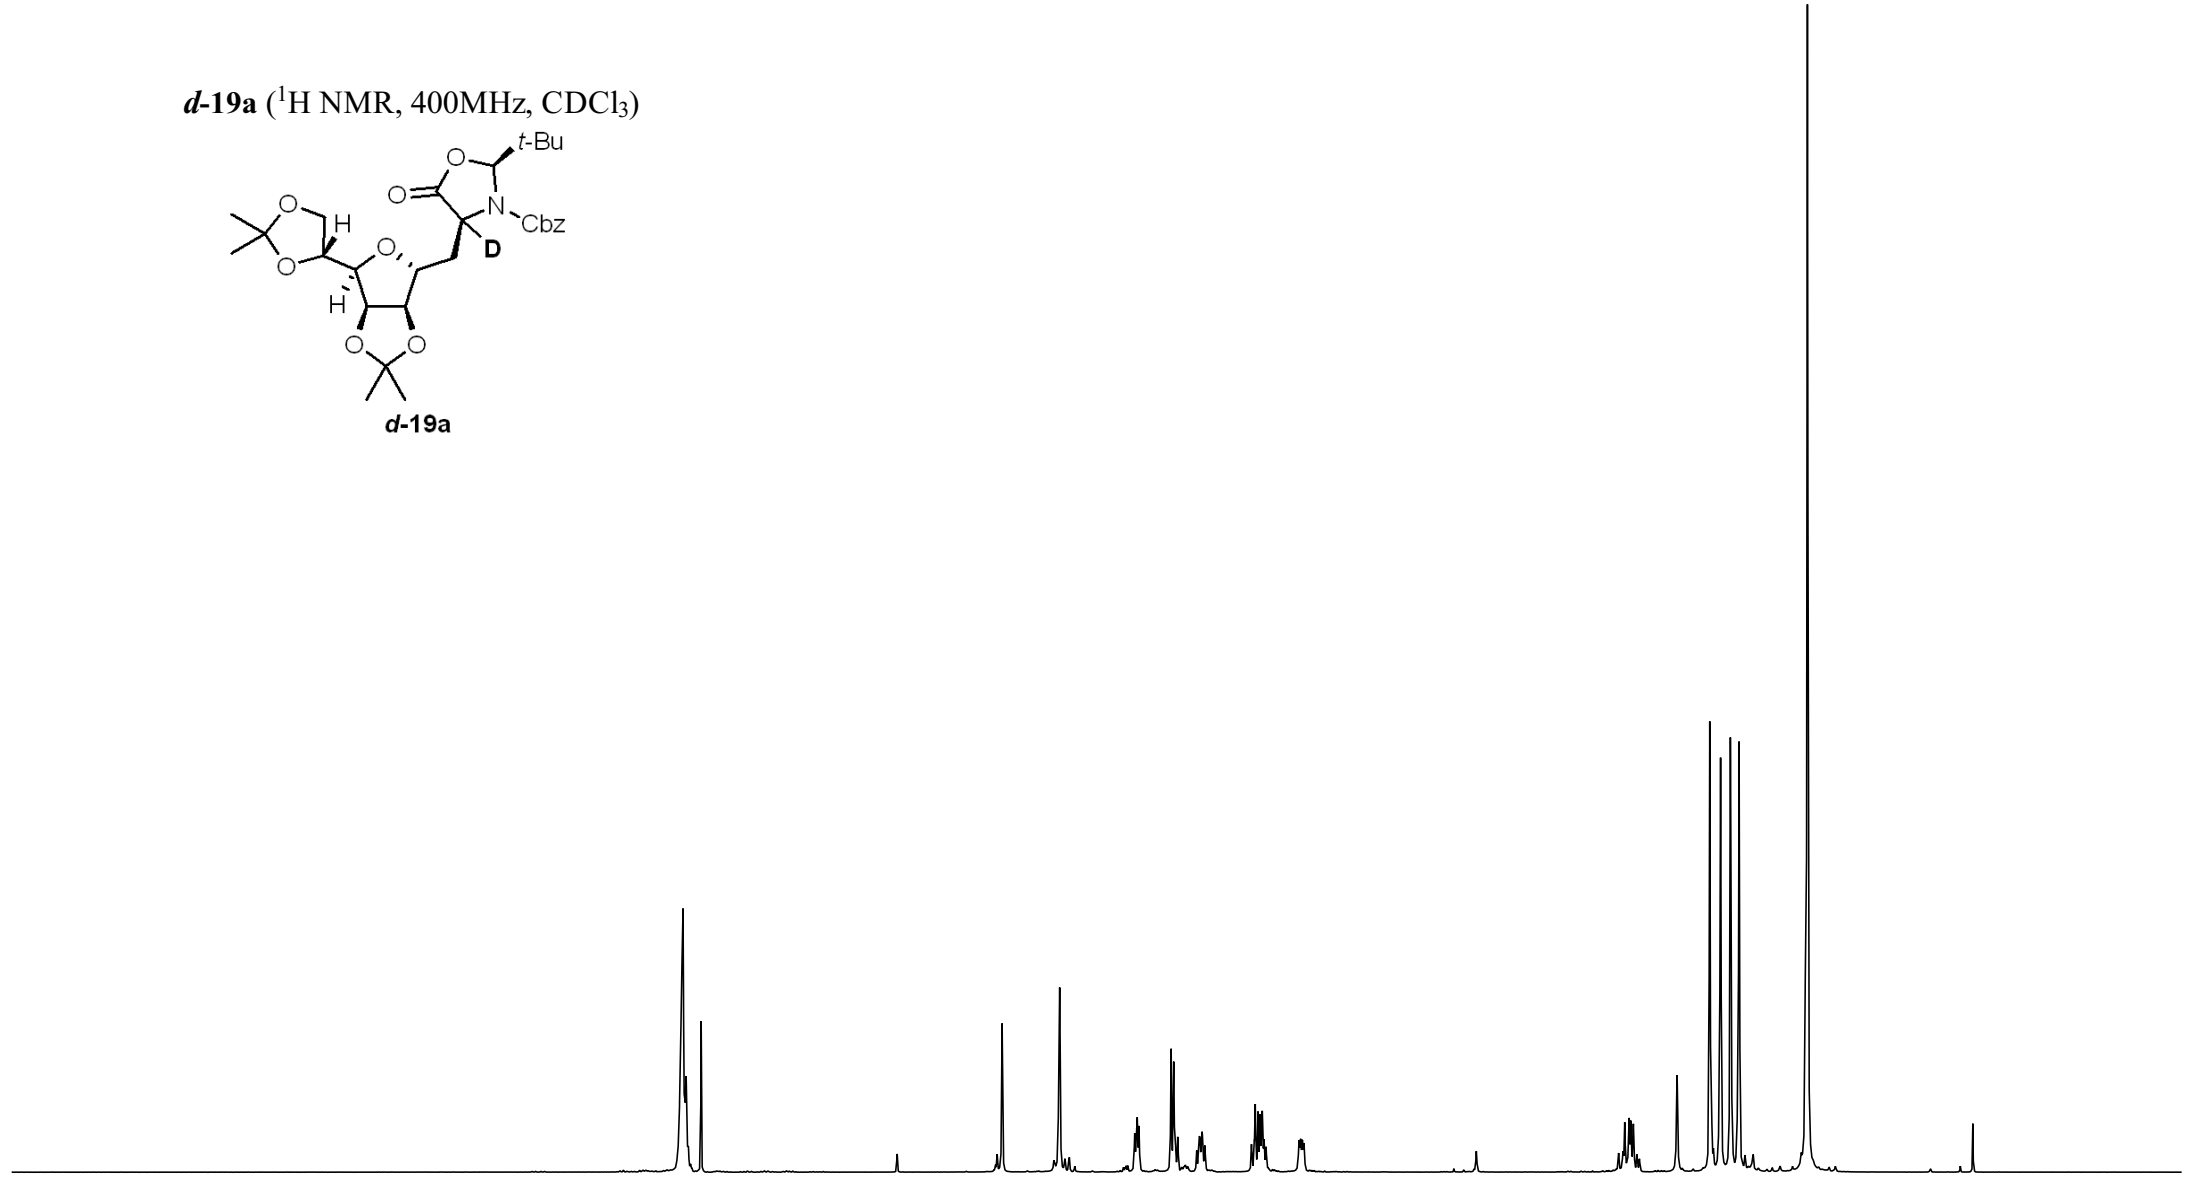

**d-19a** ( $^{13}\text{C}$  NMR, 101MHz,  $\text{CDCl}_3$ )

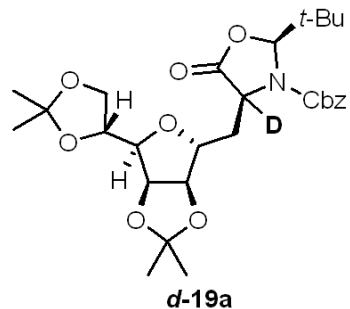

— 172.25

— 155.80

— 128.79

— 128.74

— 112.91

— 109.30

— 96.46

85.09

80.70

80.53

80.49

77.16

76.92

76.84

73.41

68.41

67.13

53.99

37.18

33.75

27.05

26.21

25.32

24.94

24.80

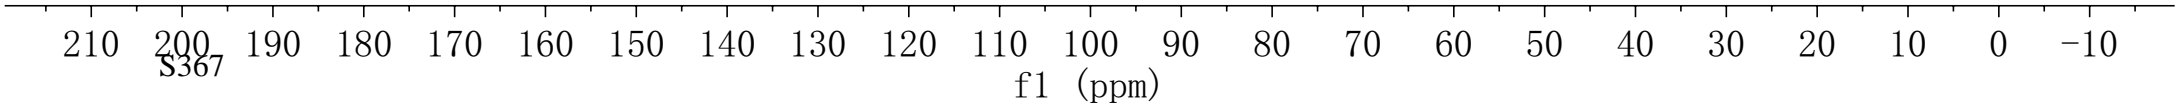

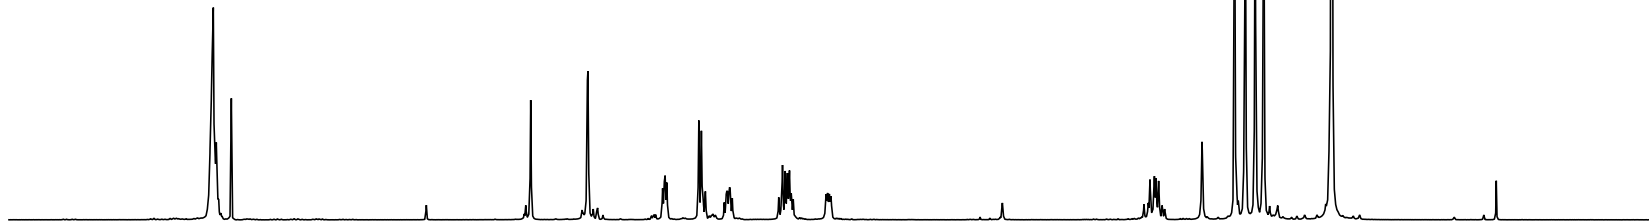

*d-19a* ( $^1\text{H}$ - $^1\text{H}$  COSY)

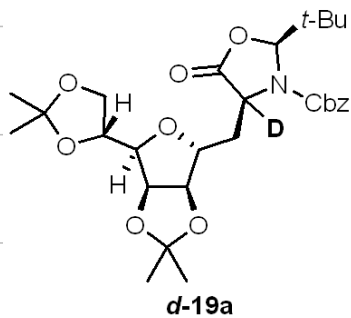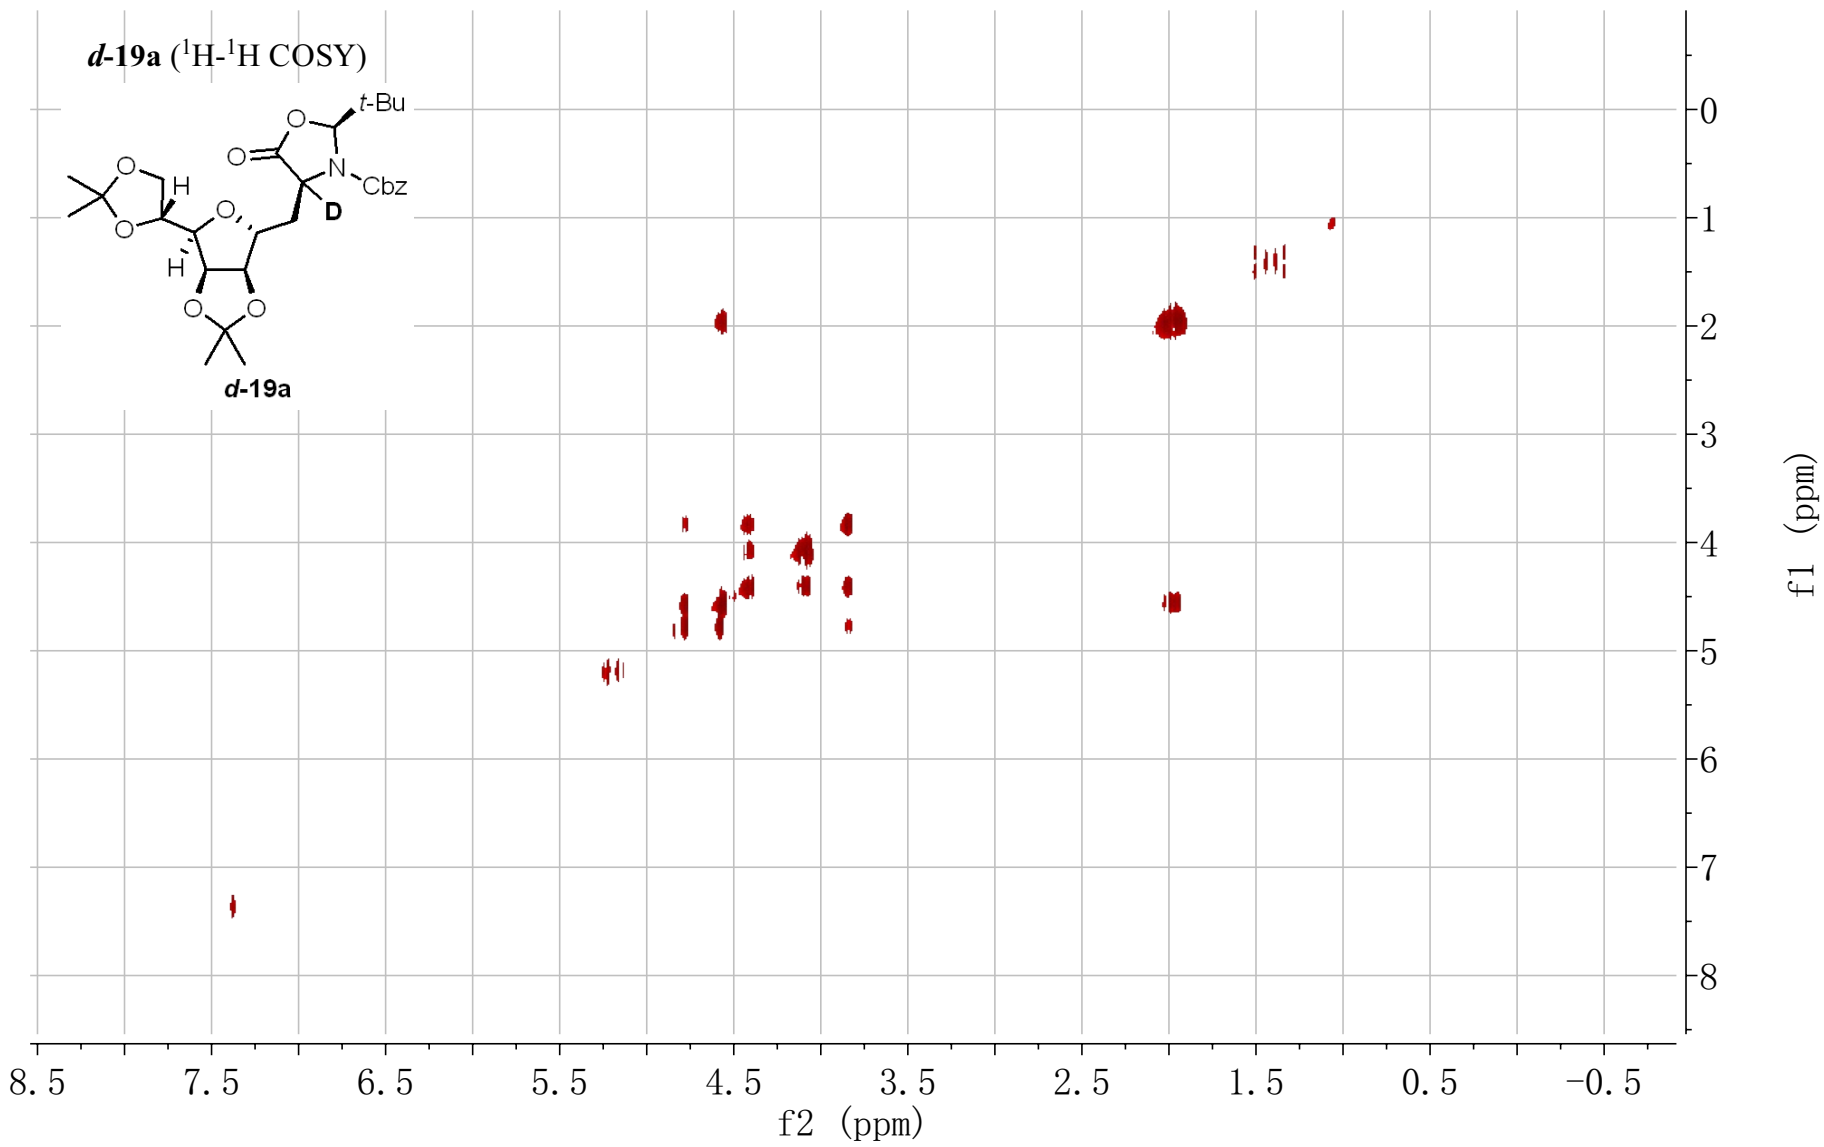

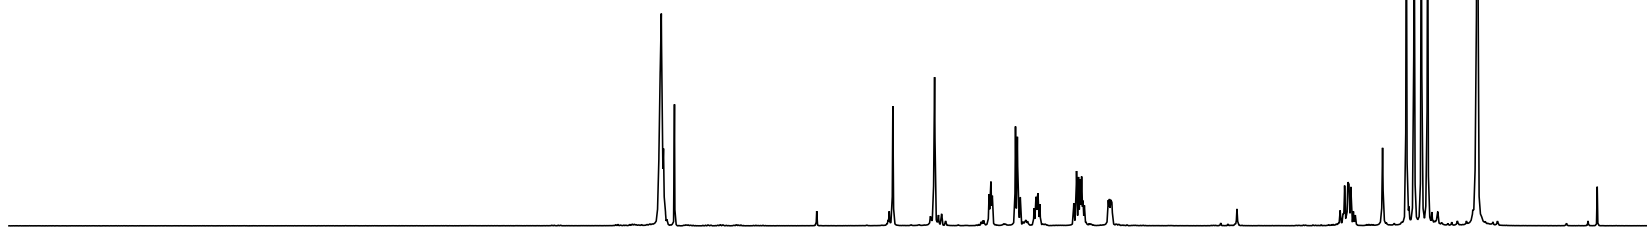

*d-19a* (<sup>1</sup>H-<sup>13</sup>C Coupled HSQC)

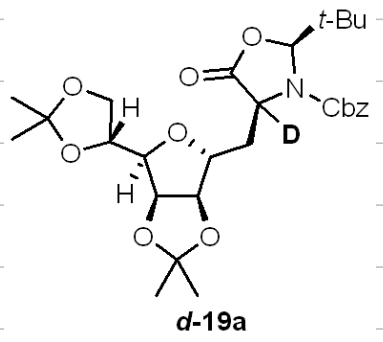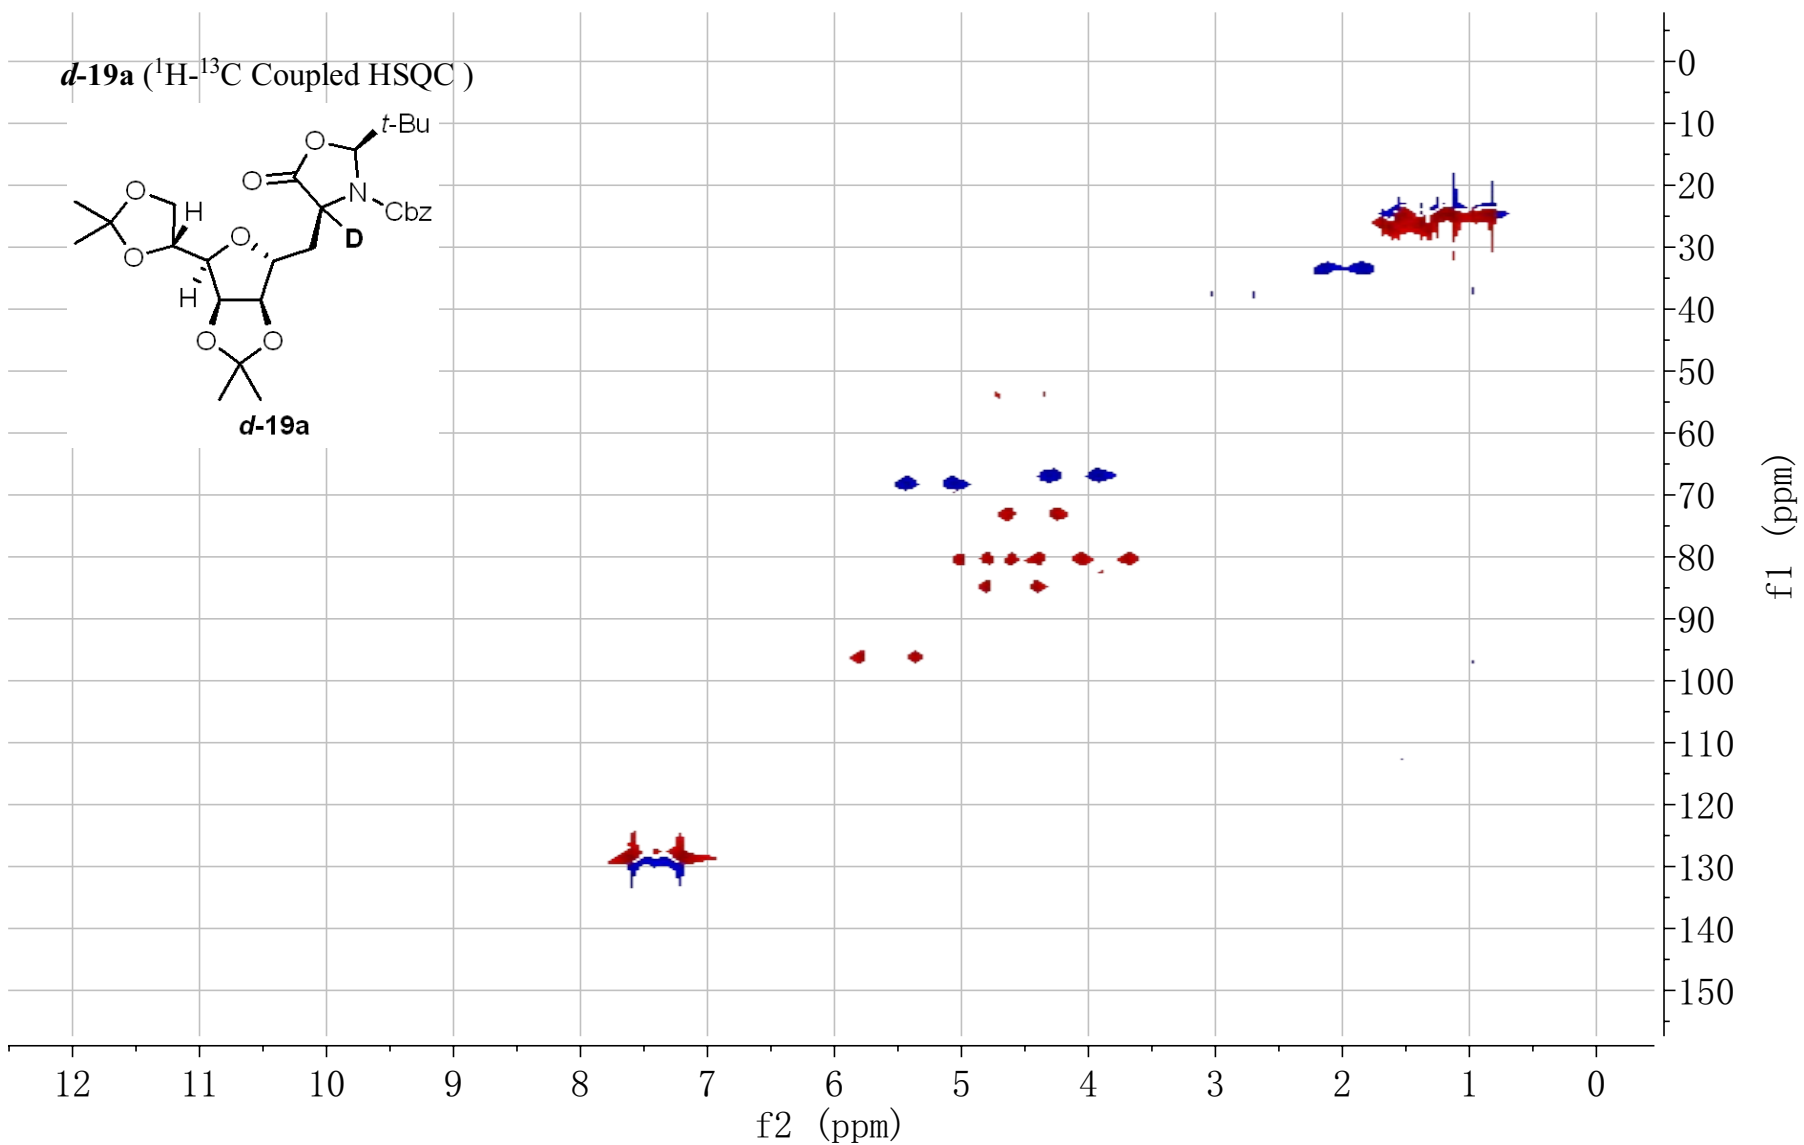

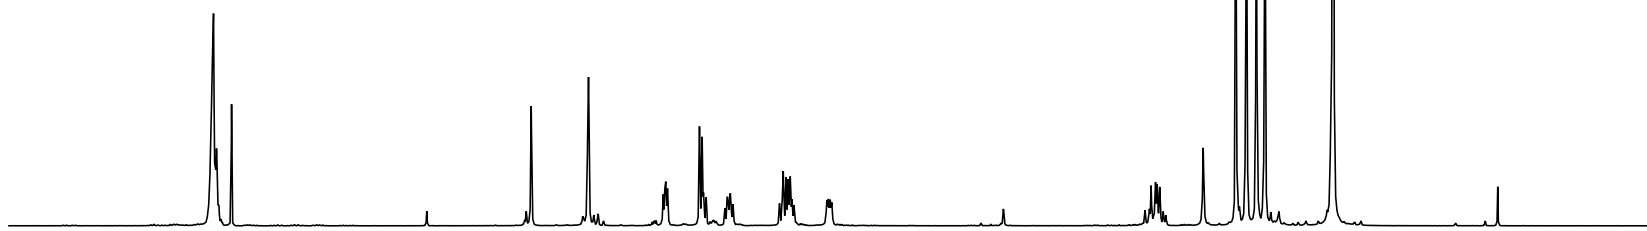

*d-19a* ( $^1\text{H}$ - $^{13}\text{C}$  HSQC)

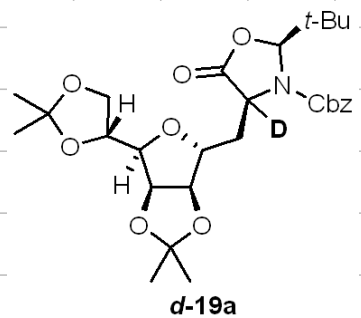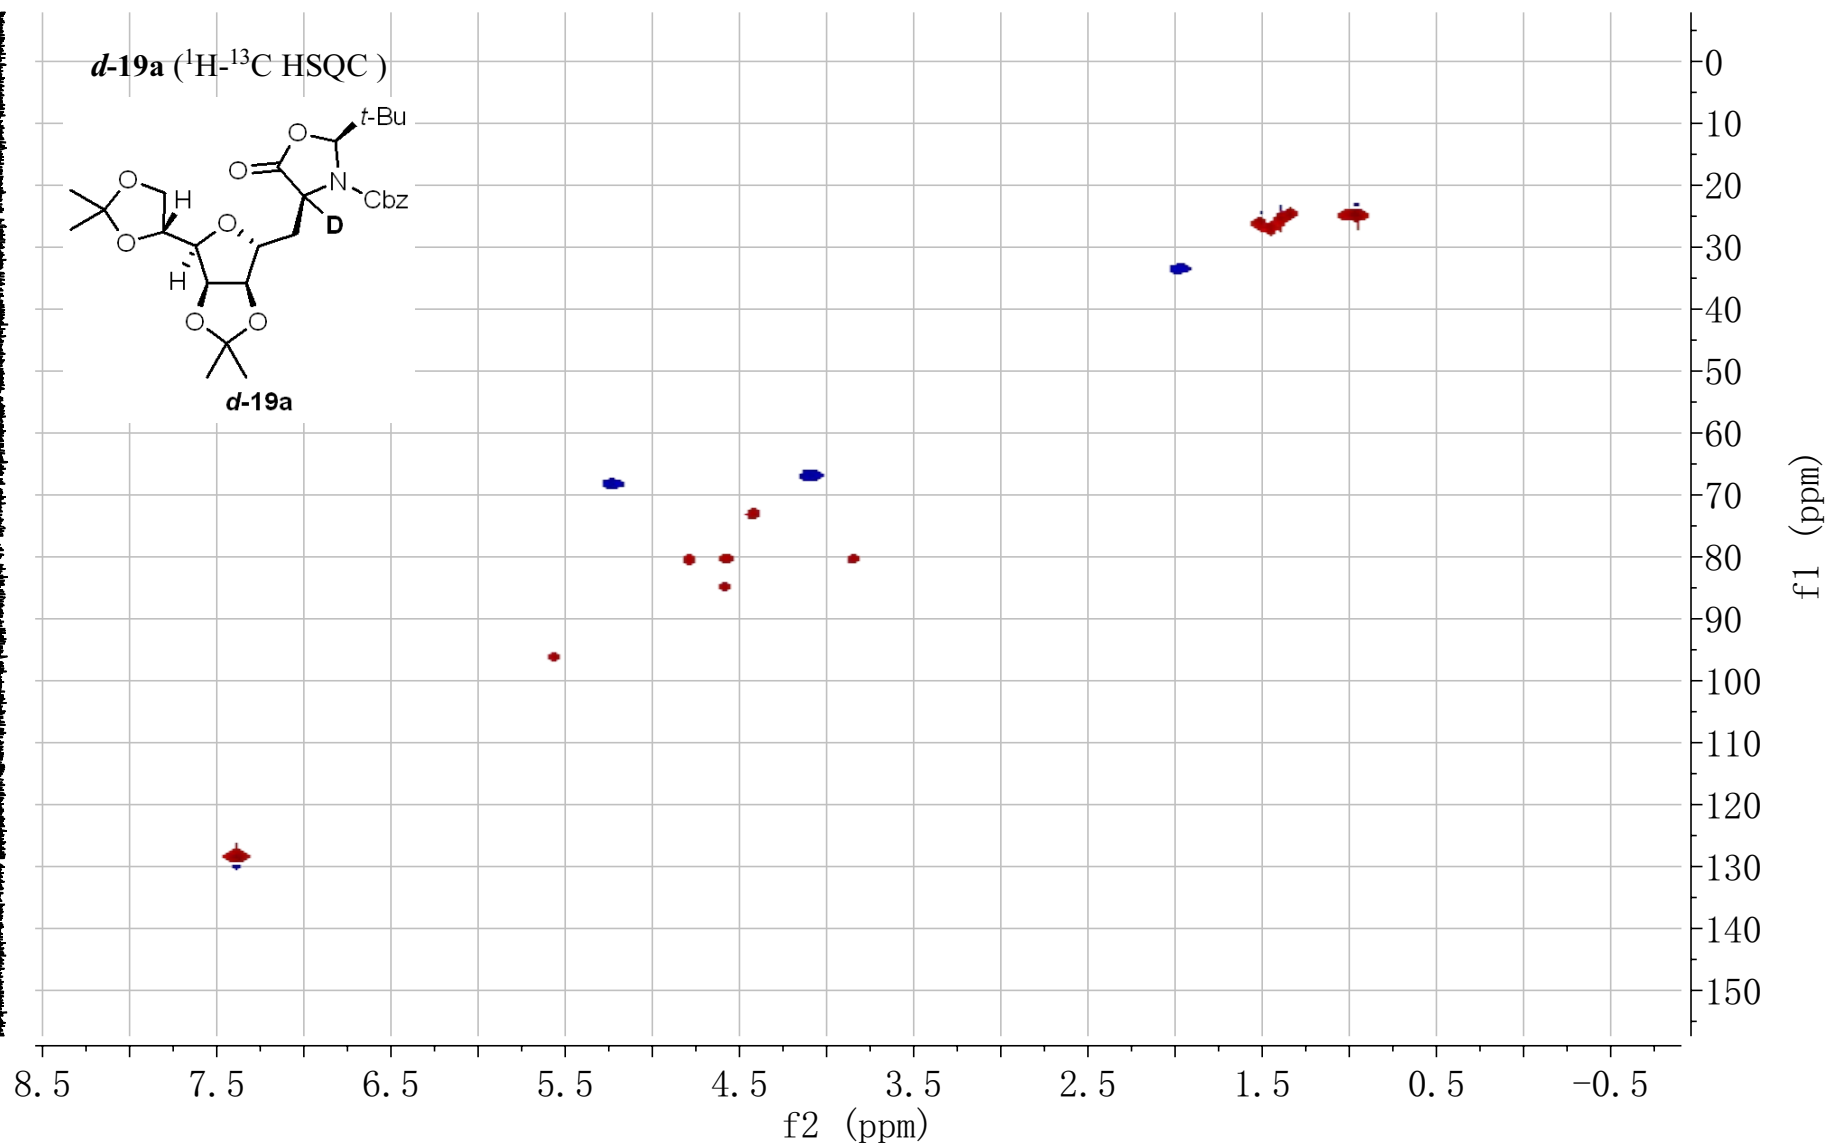

S370

7.39  
7.39  
7.38  
7.37  
7.37  
7.37  
7.36  
7.36  
7.35  
7.35  
7.26  
5.58  
5.23  
5.20  
5.16  
5.13  
4.57  
4.56  
4.55  
4.54  
3.84  
3.53  
3.52  
2.14  
2.13  
2.12  
2.11  
2.10  
2.09  
2.07  
1.83  
1.82  
1.81  
1.80  
1.80  
1.78  
1.78  
1.77  
1.75  
1.57  
1.56  
1.54  
1.53  
1.52  
1.51  
1.51  
1.44  
1.43  
1.43  
1.42  
1.42  
1.41  
1.40  
1.40  
1.37  
1.26  
1.23  
1.22  
0.95

**31a** (<sup>1</sup>H NMR, 400MHz, CDCl<sub>3</sub>)

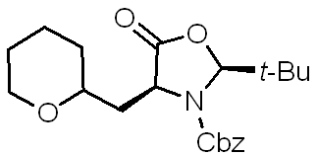

**31a**

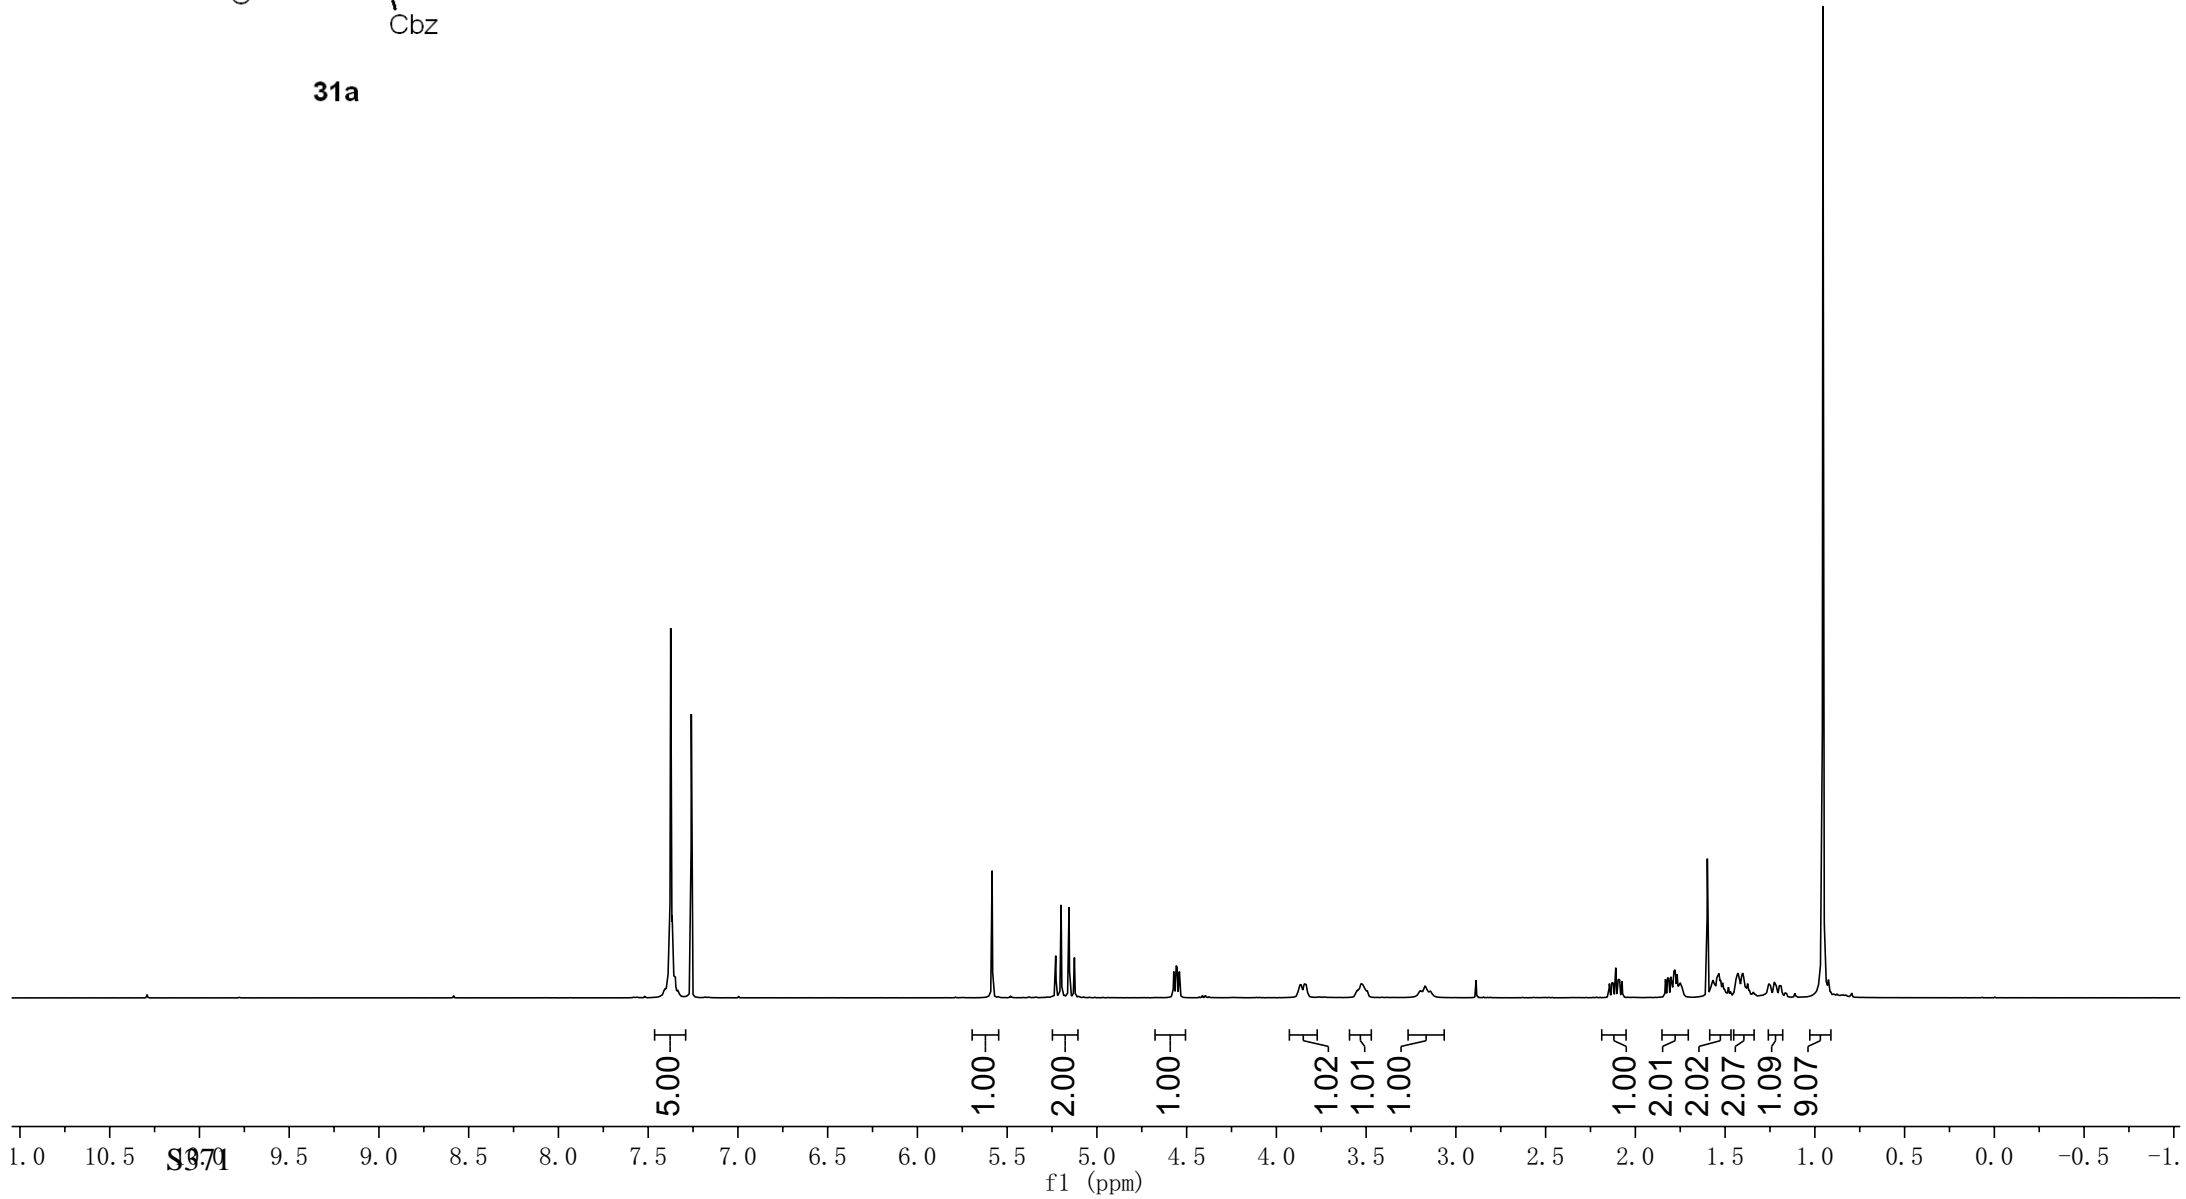

**31a** ( $^{13}\text{C}$  NMR, 101MHz,  $\text{CDCl}_3$ )

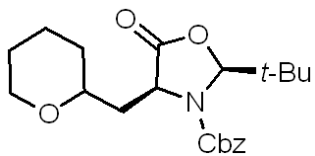

**31a**

—173.16

—156.35

—135.39

—96.63

77.48

77.16

76.84

73.90

68.57

68.35

—54.23

—40.81

—37.06

31.89

26.01

25.07

—23.41

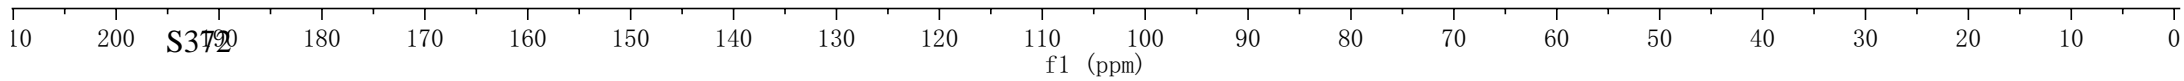

Supplement: d3sc01995k1.pdf [file d3sc01995k1.pdf]
